# Supplementary material
Source: publisher figshare collection journal article supplement (https://gsajournals.figshare.com/articles/dataset/_/11908326)

**Figure S1:** Alignments of male and female lake trout linkage maps to the Arctic Char chromosomes. The following figures display the linkage map position on the Y-axis and the chromosomal position on the X-axis for the two chromosomes with the most alignments for a given linkage groups. Figure headings list the lake trout linkage group first (sna1-42) and the Arctic Char chromosome to which they align second. The male linkage map is displayed in red and the female linkage map is displayed in blue.

sna1 vs. NC\_036855.1

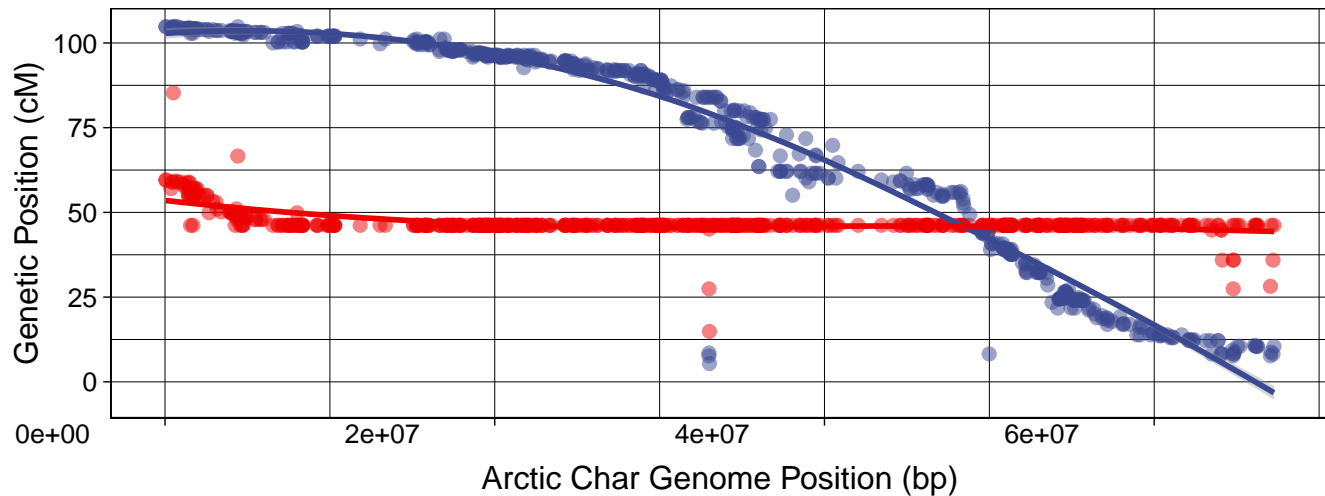

sna1 vs. NC\_036850.1

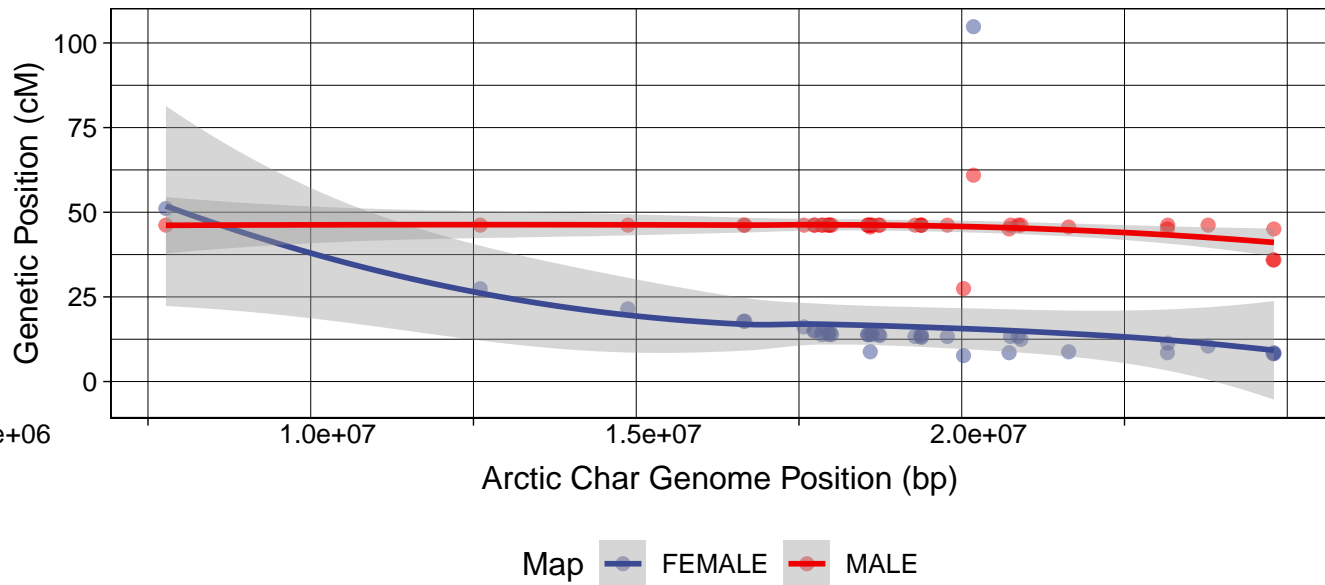

sna2 vs. NC\_036838.1

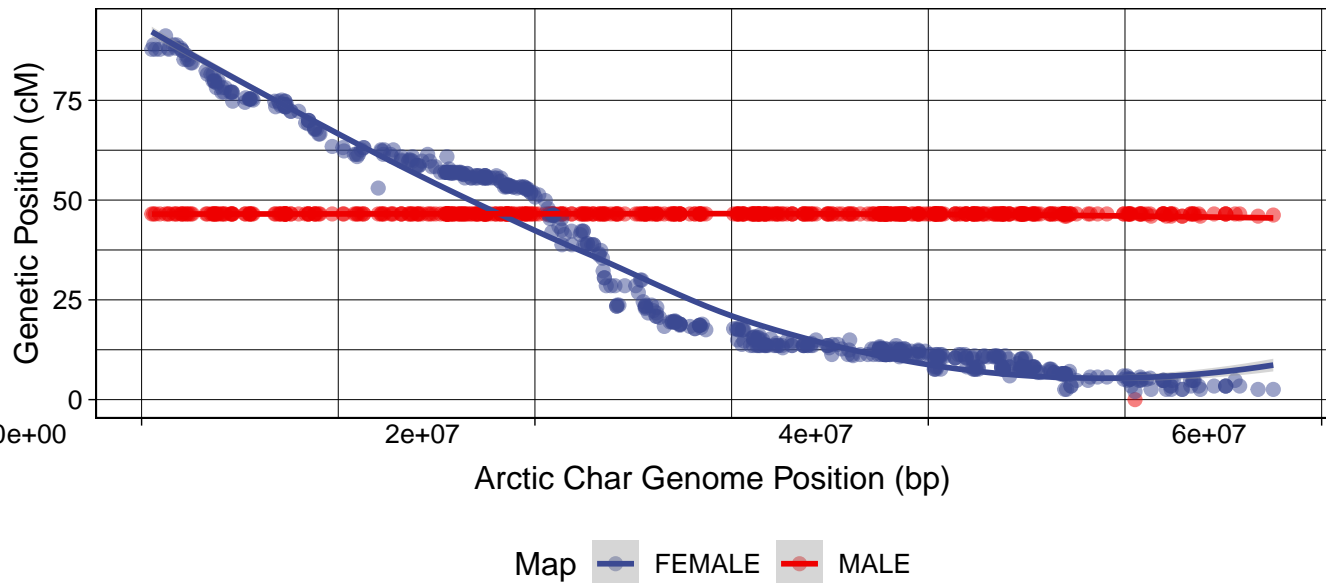

sna2 vs. NW\_019942505.1

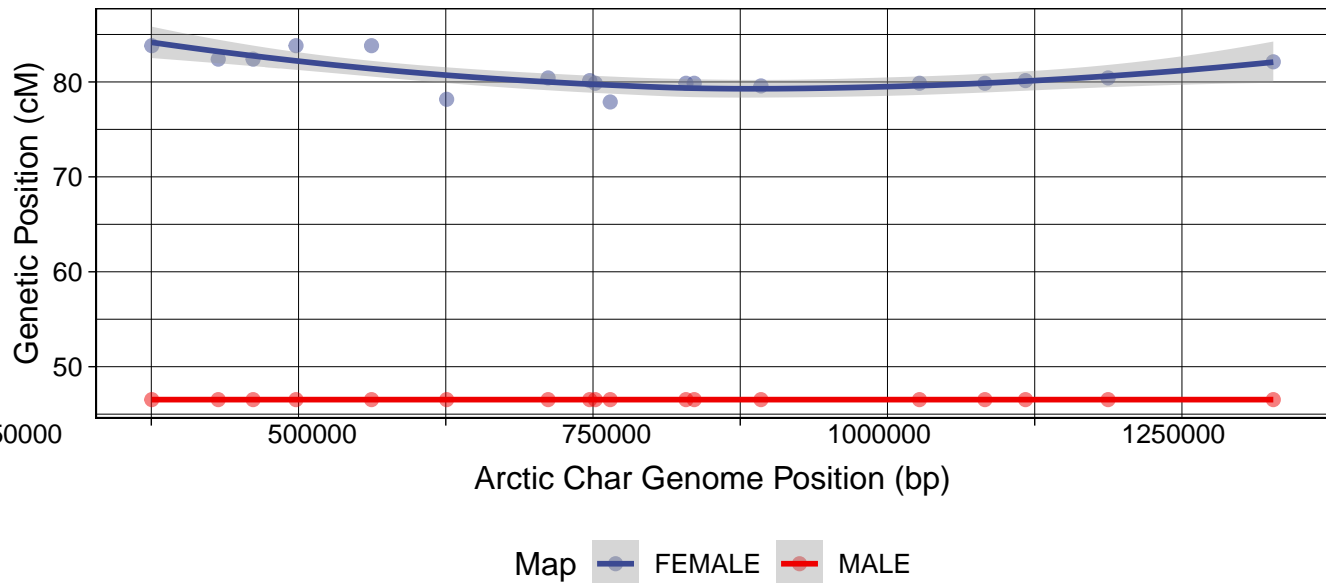

sna3 vs. NC\_036860.1

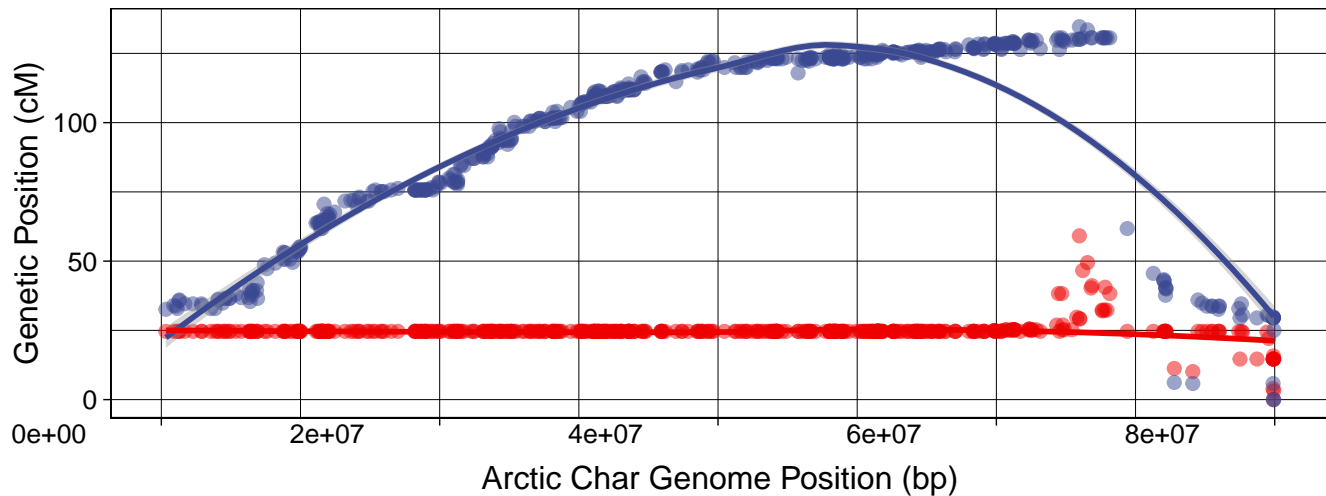

sna3 vs. NW\_019942726.1

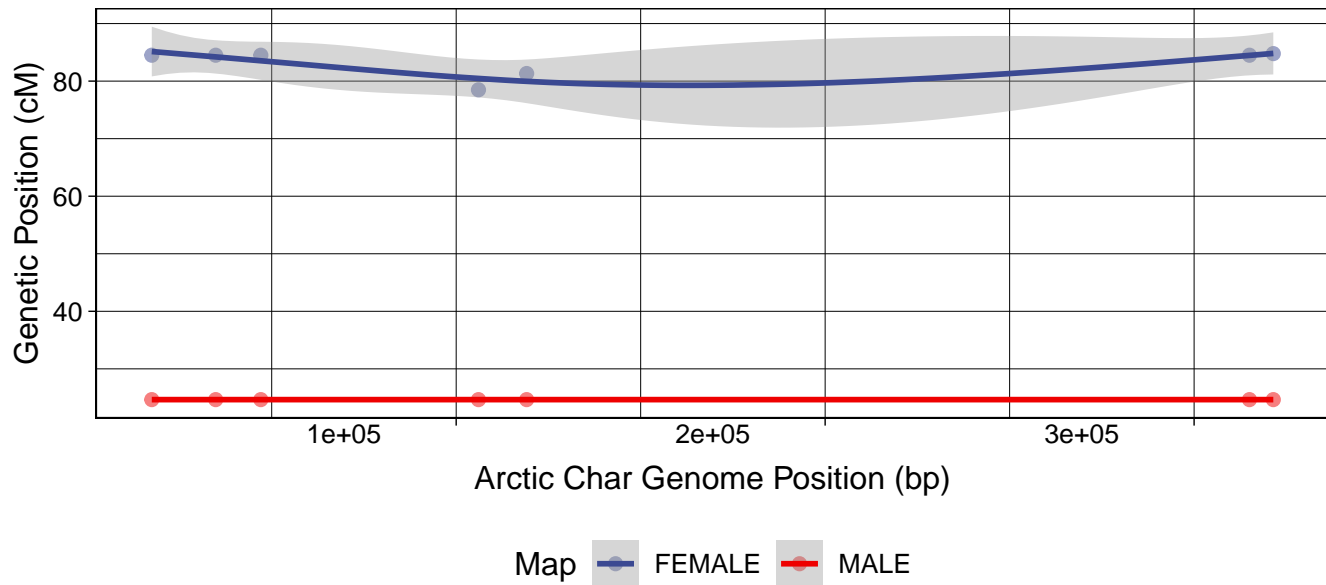

sna4 vs. NC\_036858.1

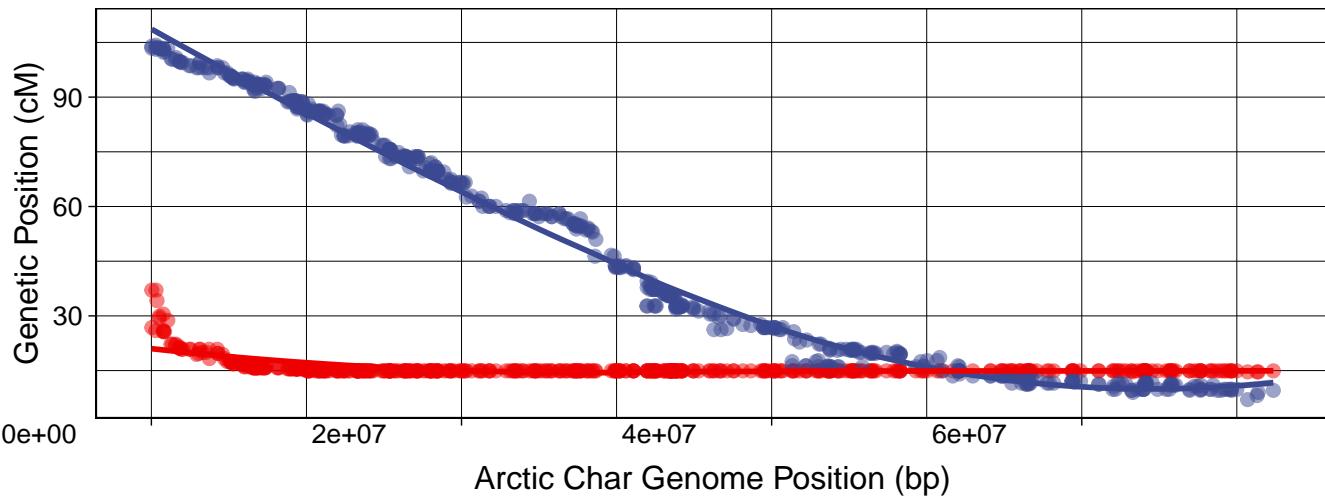

sna4 vs. NW\_019942656.1

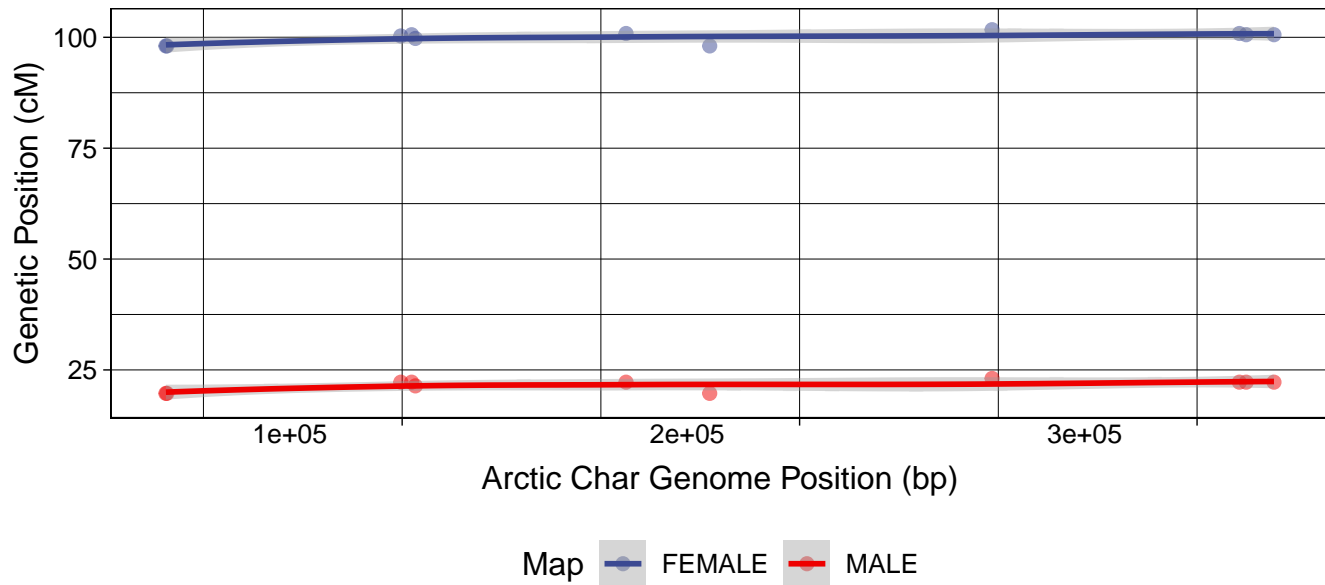

sna5 vs. NC\_036846.1

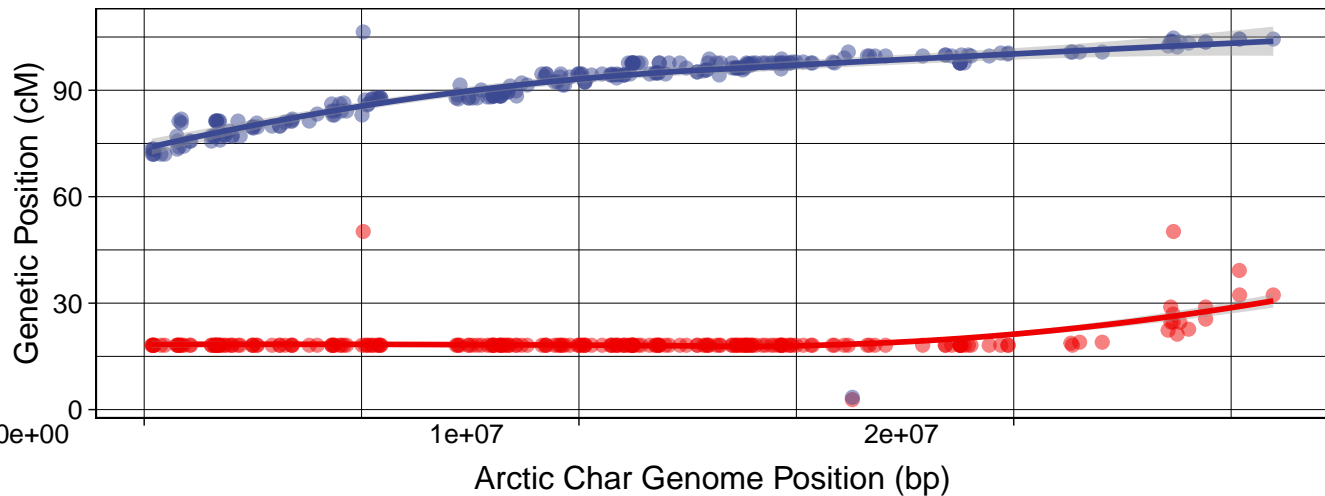

sna5 vs. NC\_036845.1

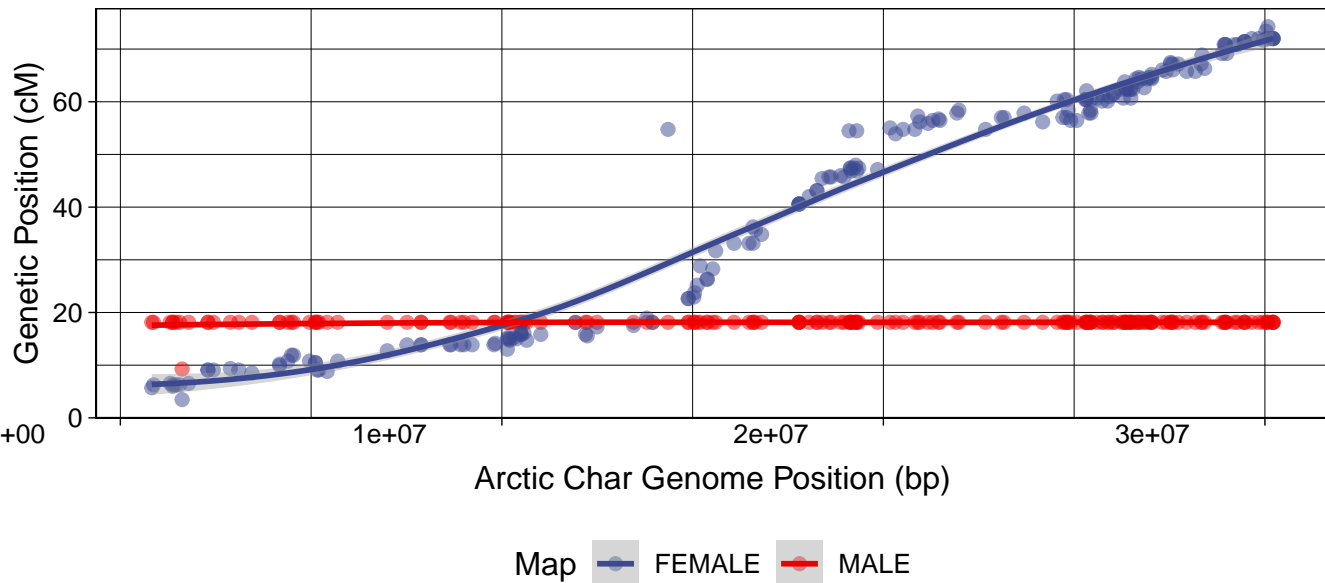

sna6 vs. NC\_036840.1

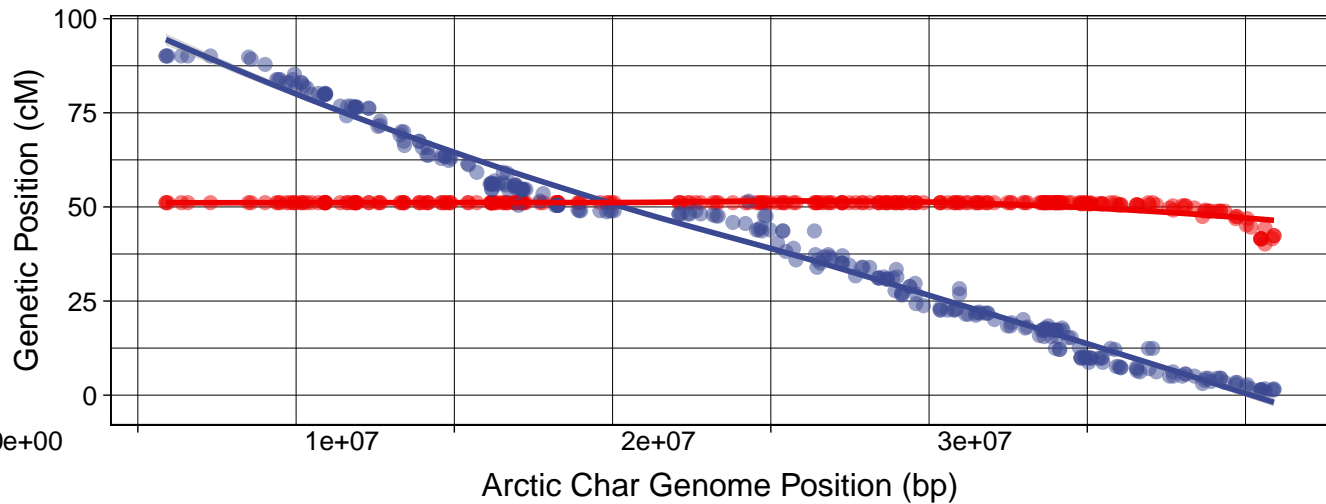

sna6 vs. NC\_036864.1

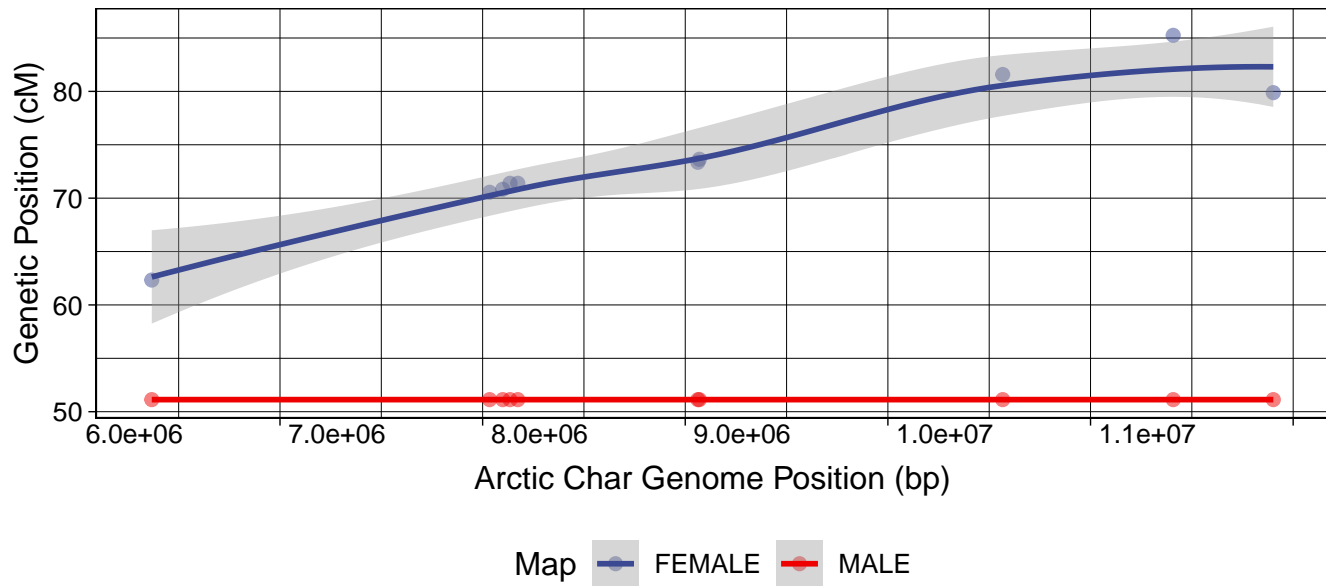

sna7 vs. NC\_036867.1

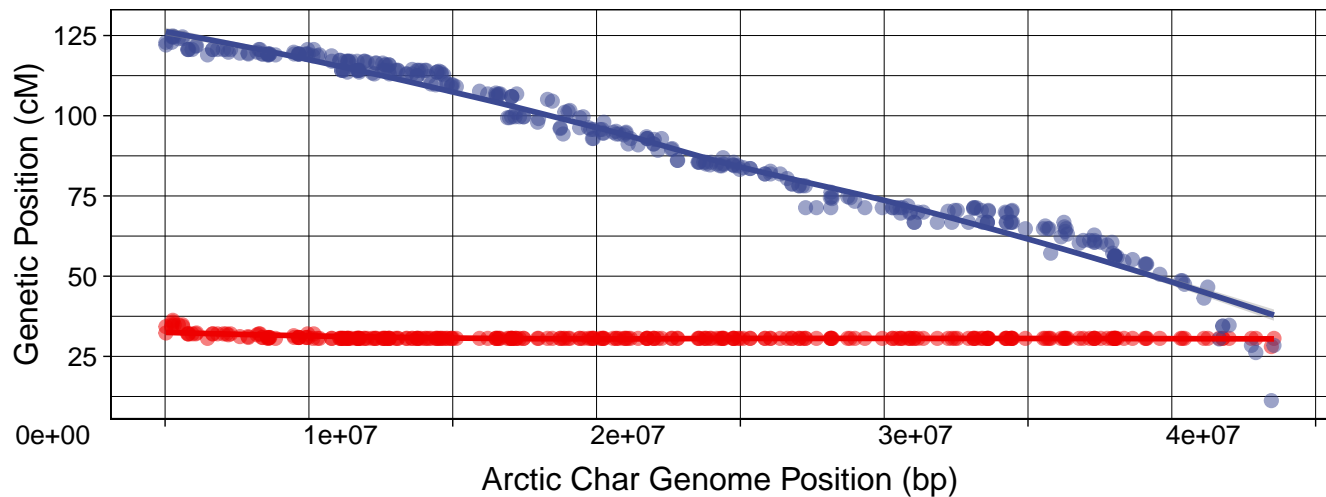

sna7 vs. NC\_036852.1

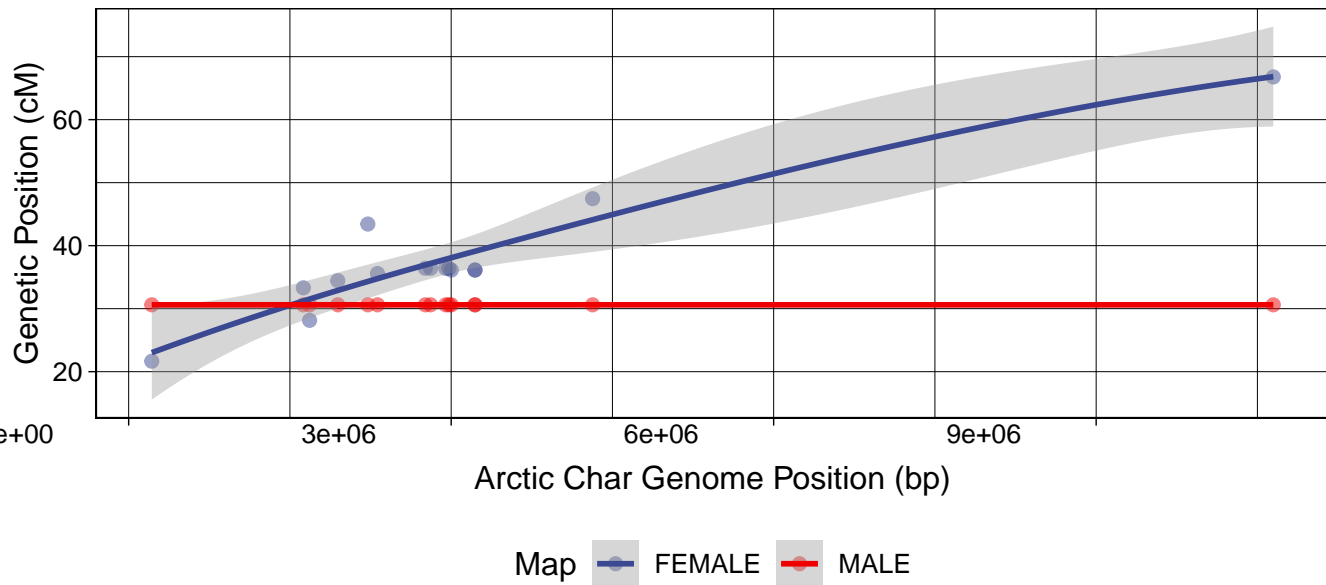



sna8 vs. NC\_036853.1

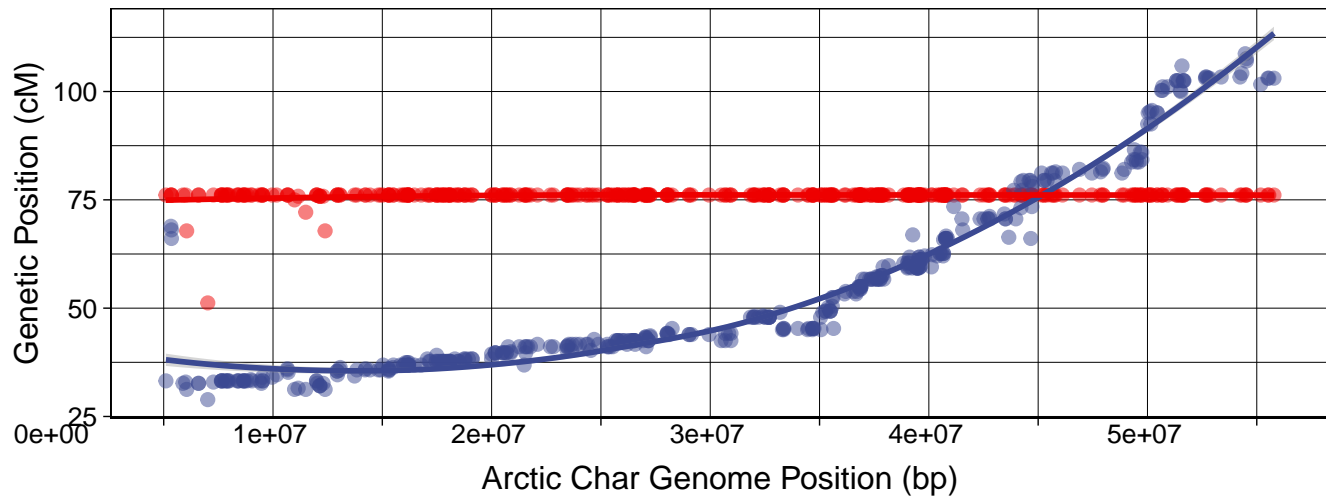

sna8 vs. NC\_036838.1

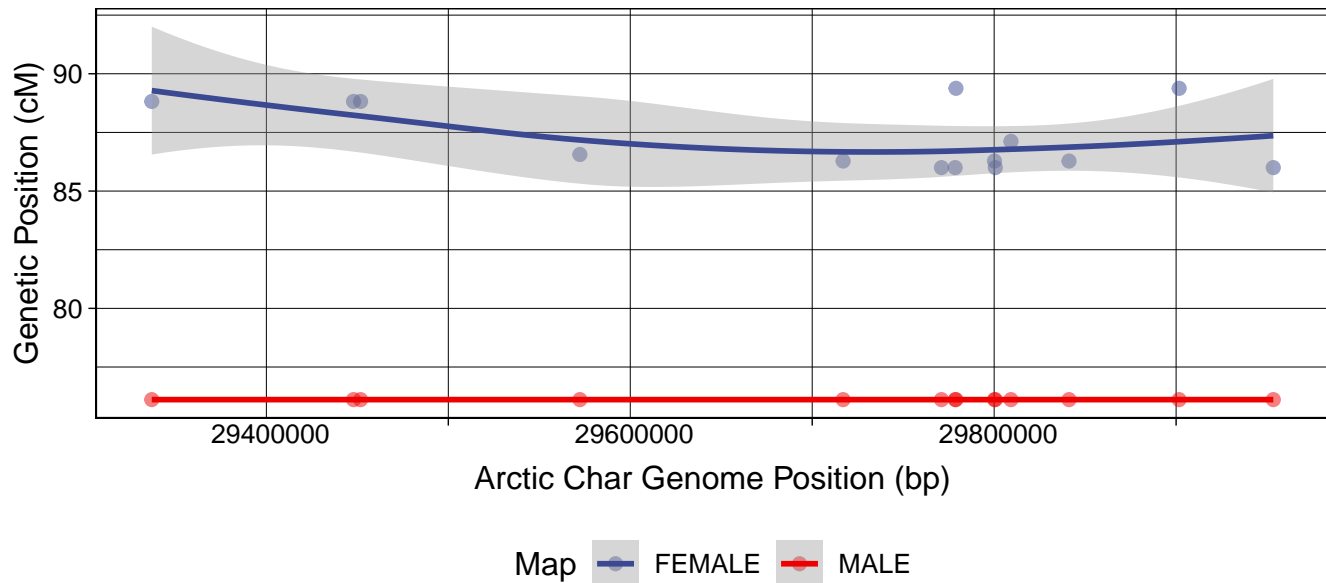

sna9 vs. NC\_036866.1

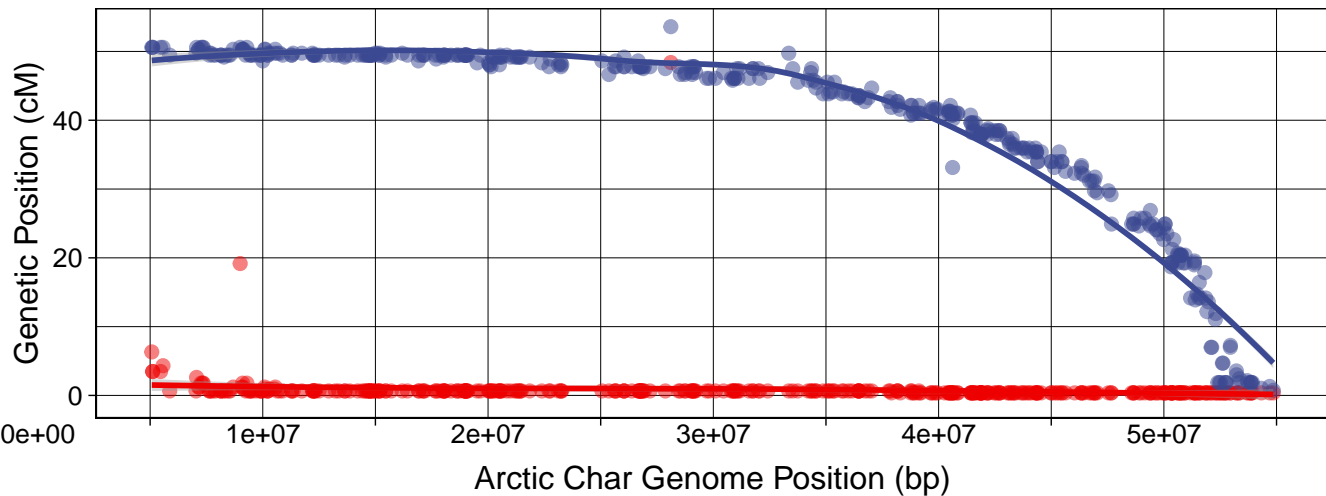

sna9 vs. NW\_019942811.1

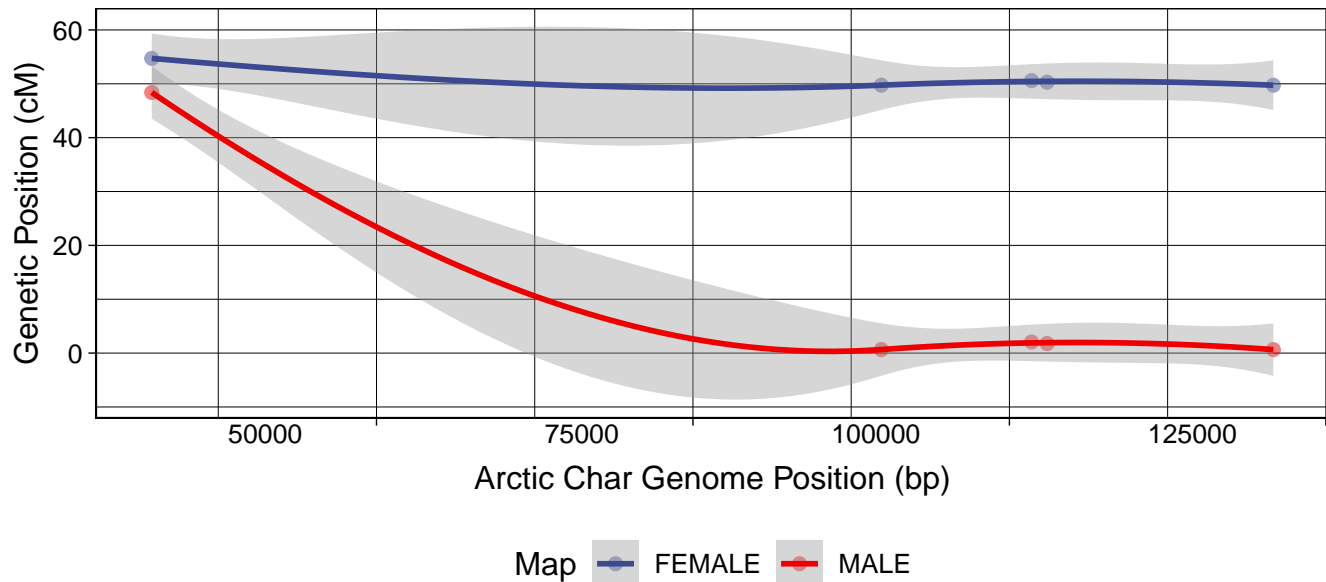

sna10 vs. NC\_036856.1

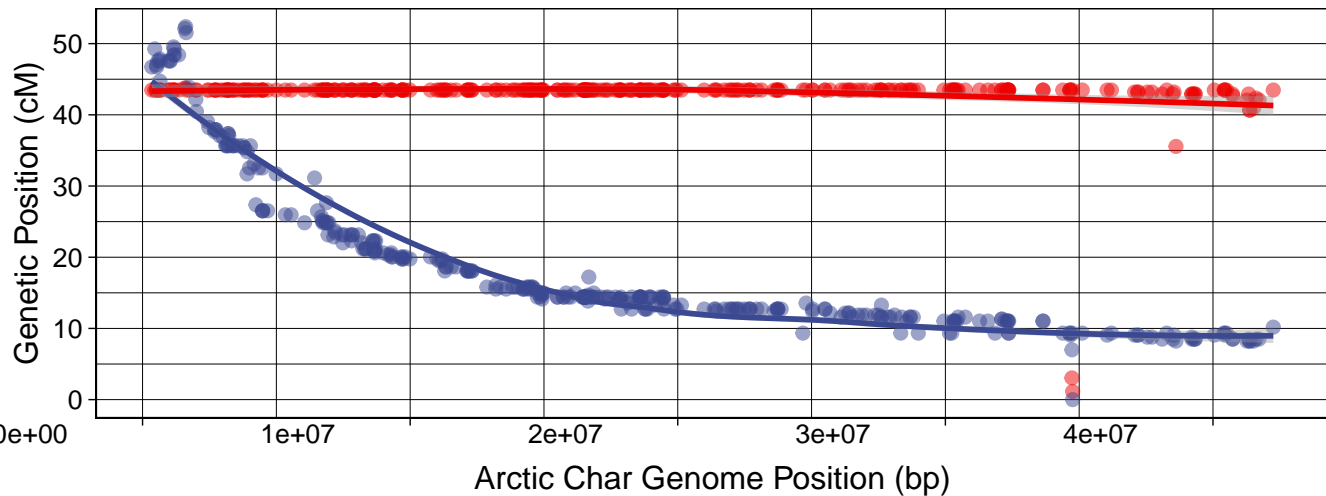

sna10 vs. NC\_036843.1

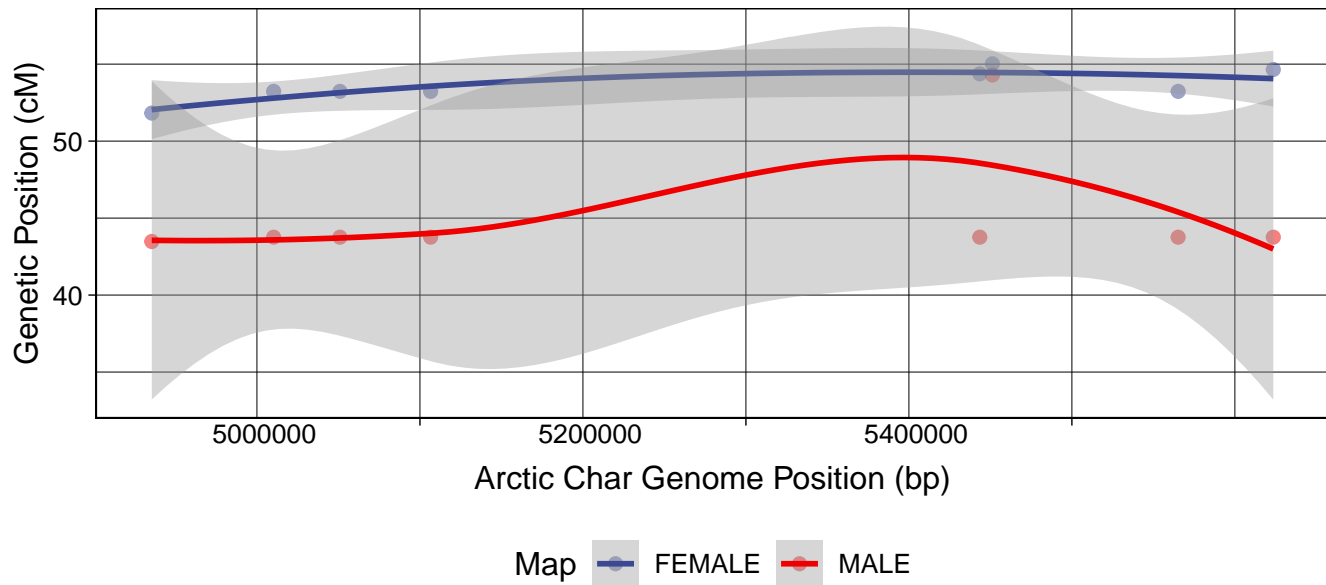

sna11 vs. NC\_036871.1

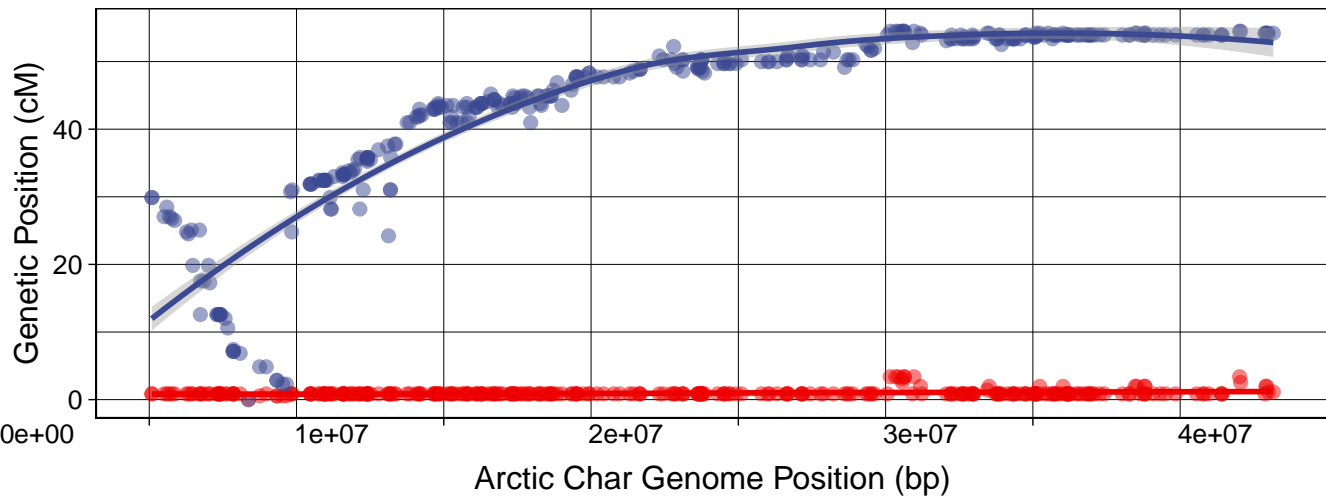

sna11 vs. NW\_019942692.1

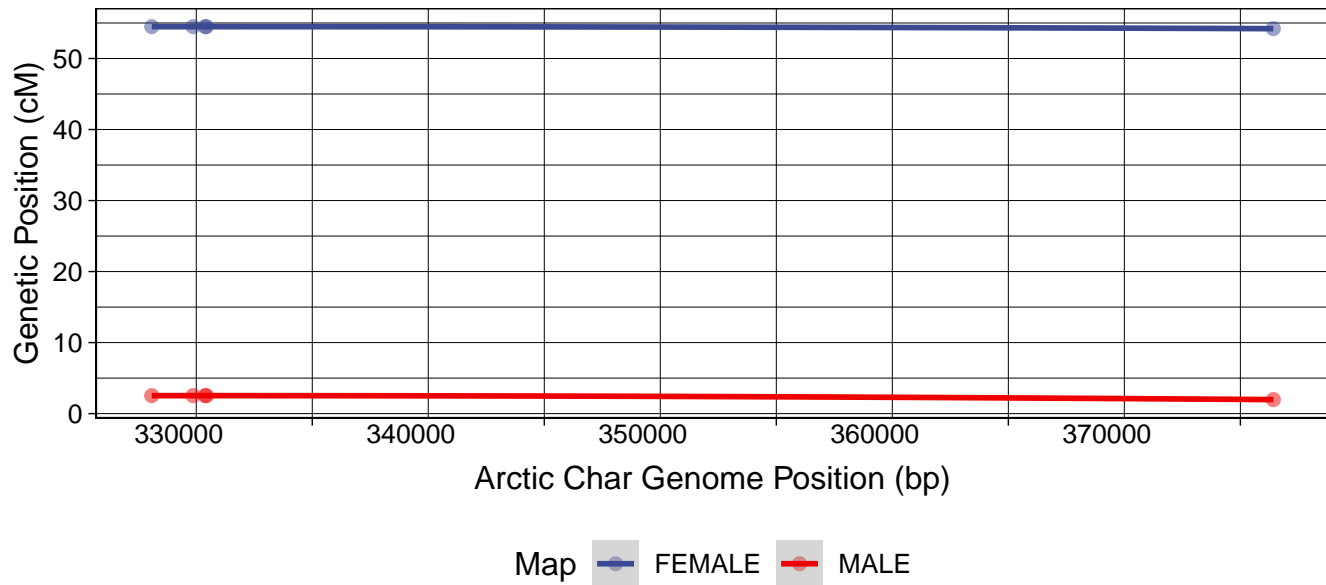

sna12 vs. NC\_036863.1

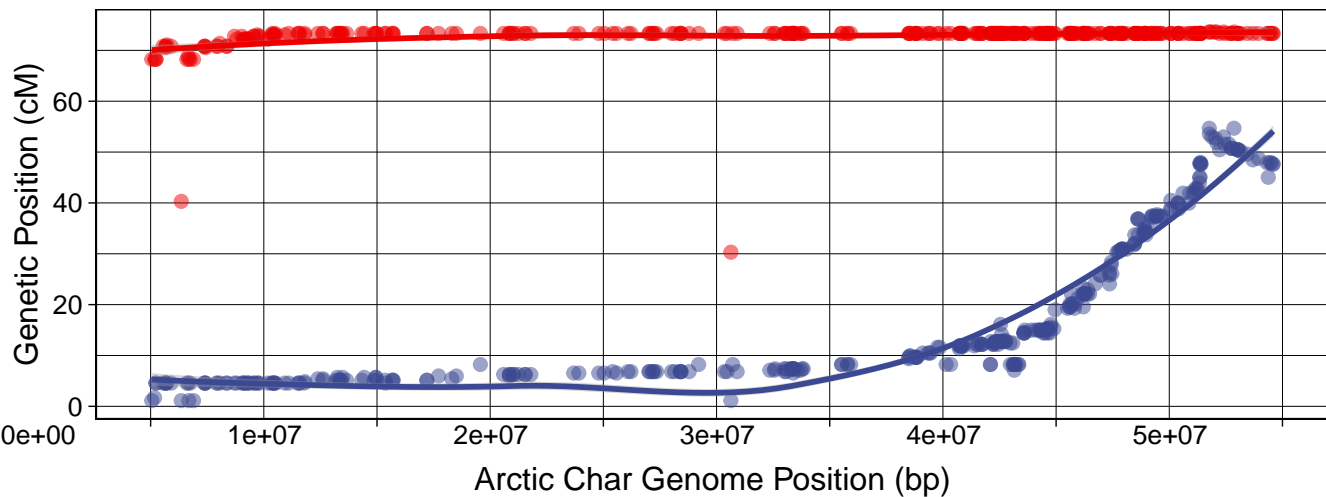

sna12 vs. NW\_019943072.1

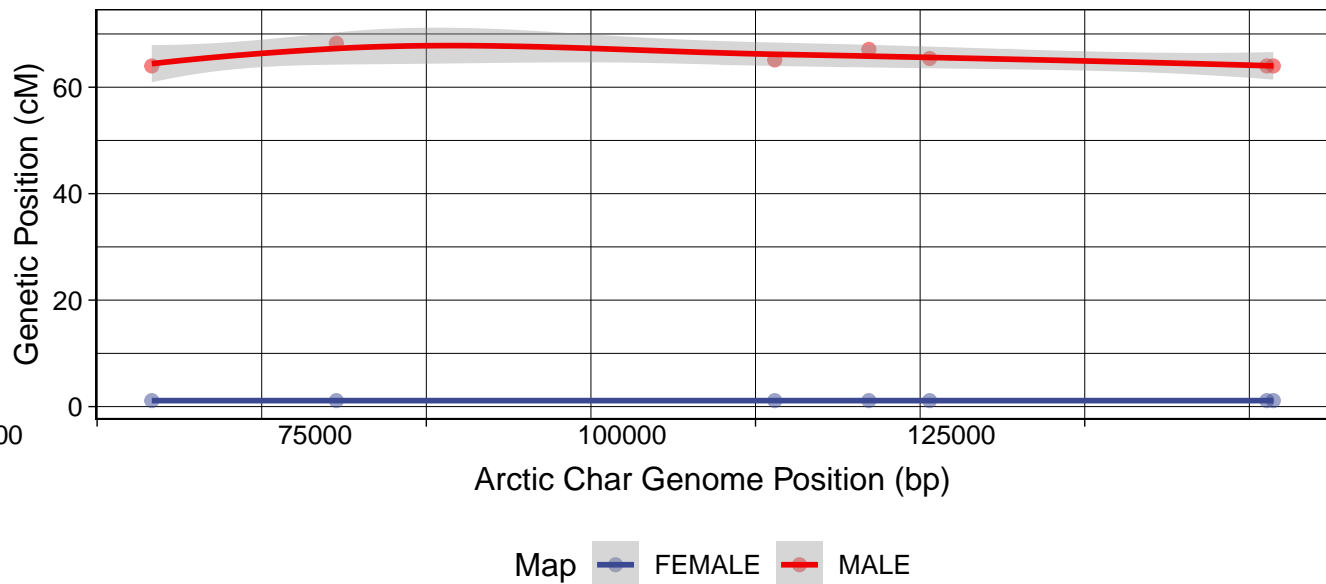

sna13 vs. NC\_036839.1

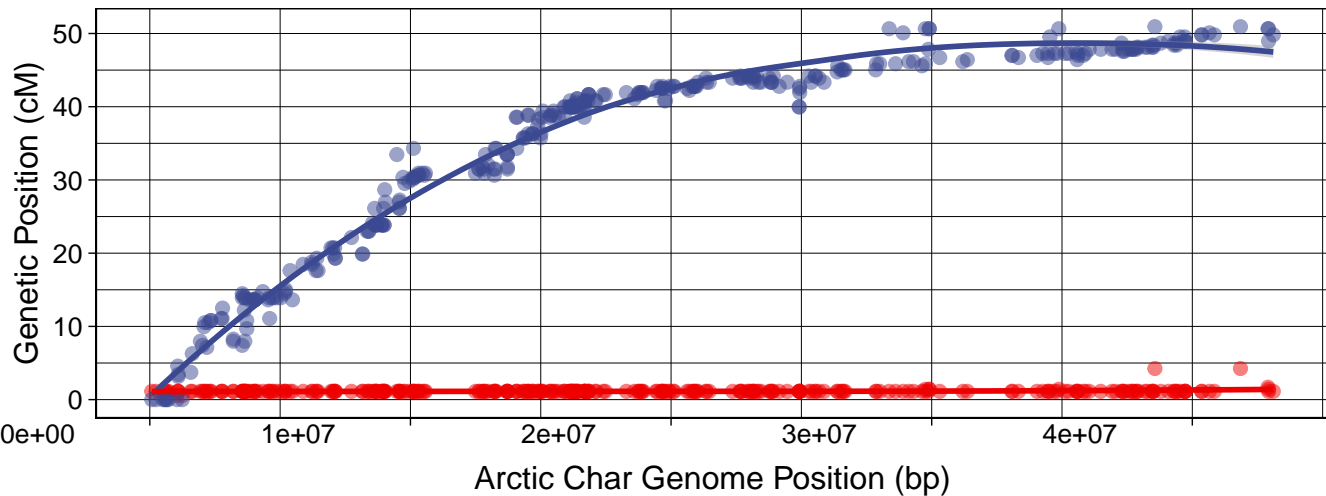

sna13 vs. NW\_019942557.1

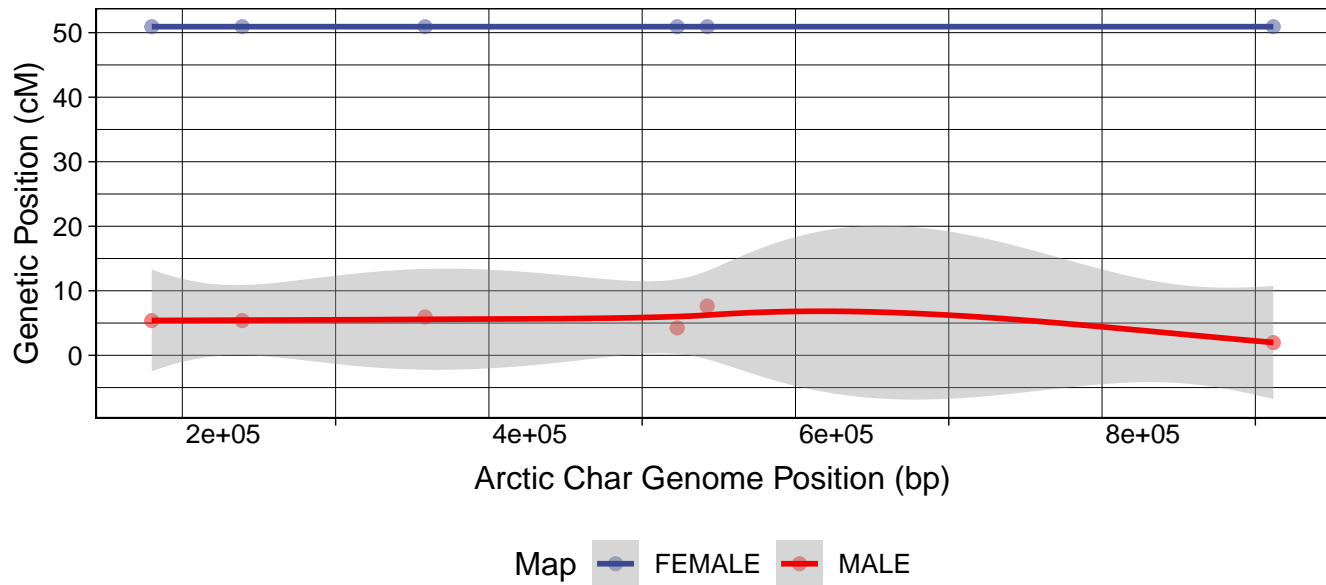

sna14 vs. NC\_036847.1

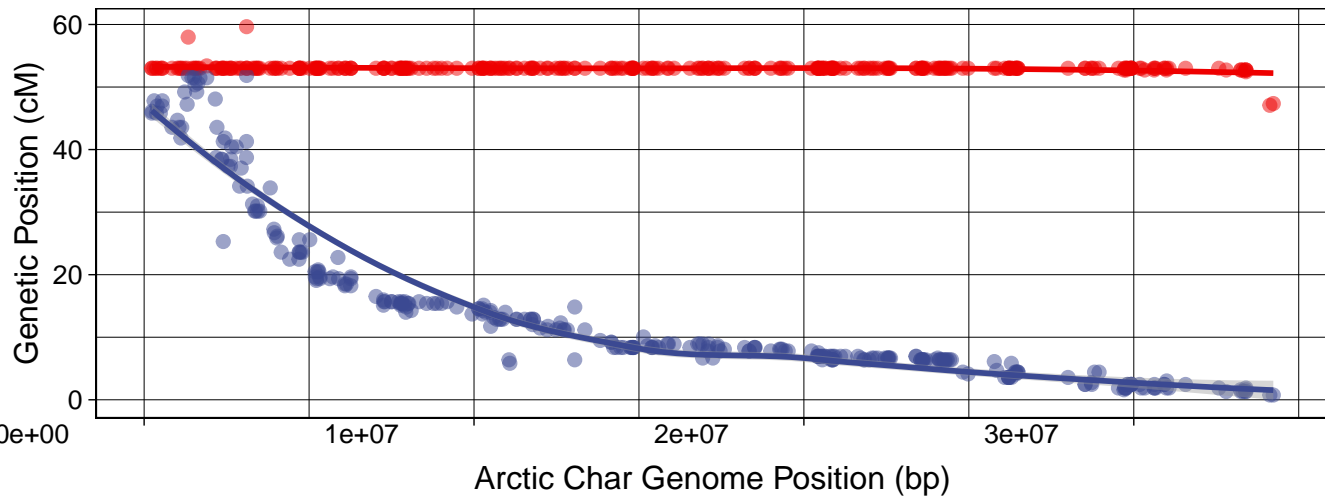

sna14 vs. NW\_019942696.1

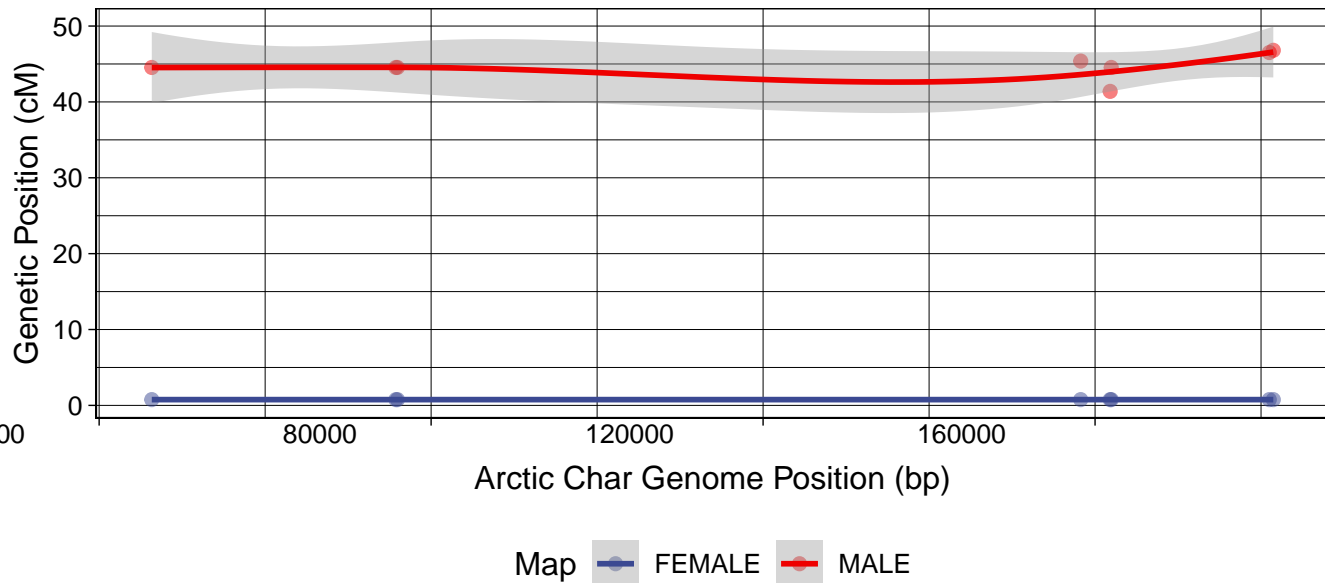

sna15 vs. NC\_036849.1

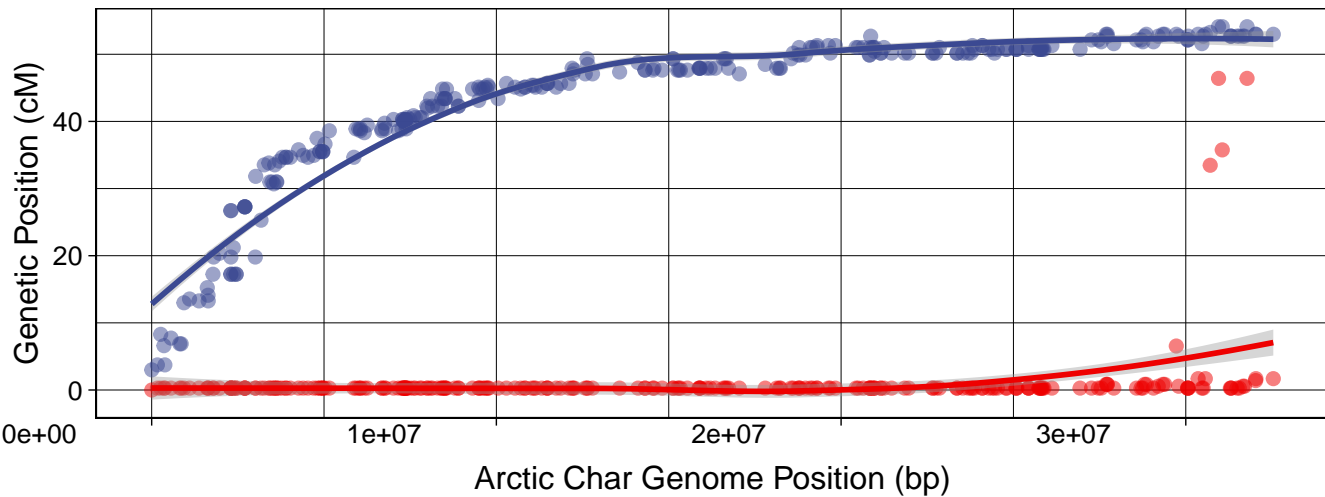

sna15 vs. NW\_019942507.1

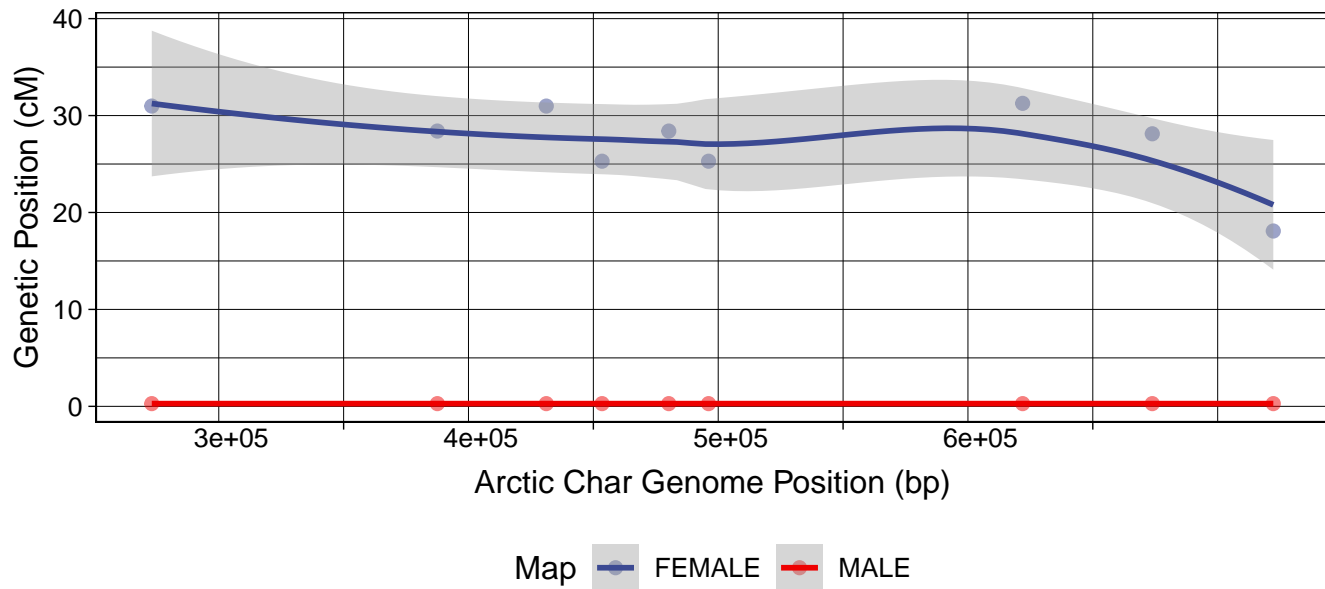



sna16 vs. NC\_036857.1

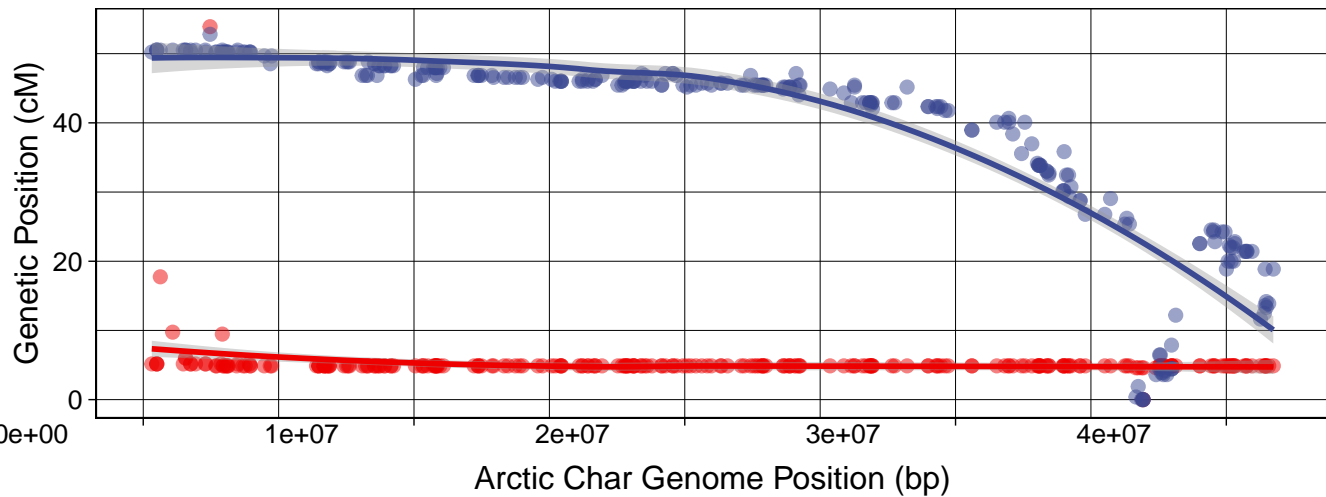

sna16 vs. NW\_019943867.1

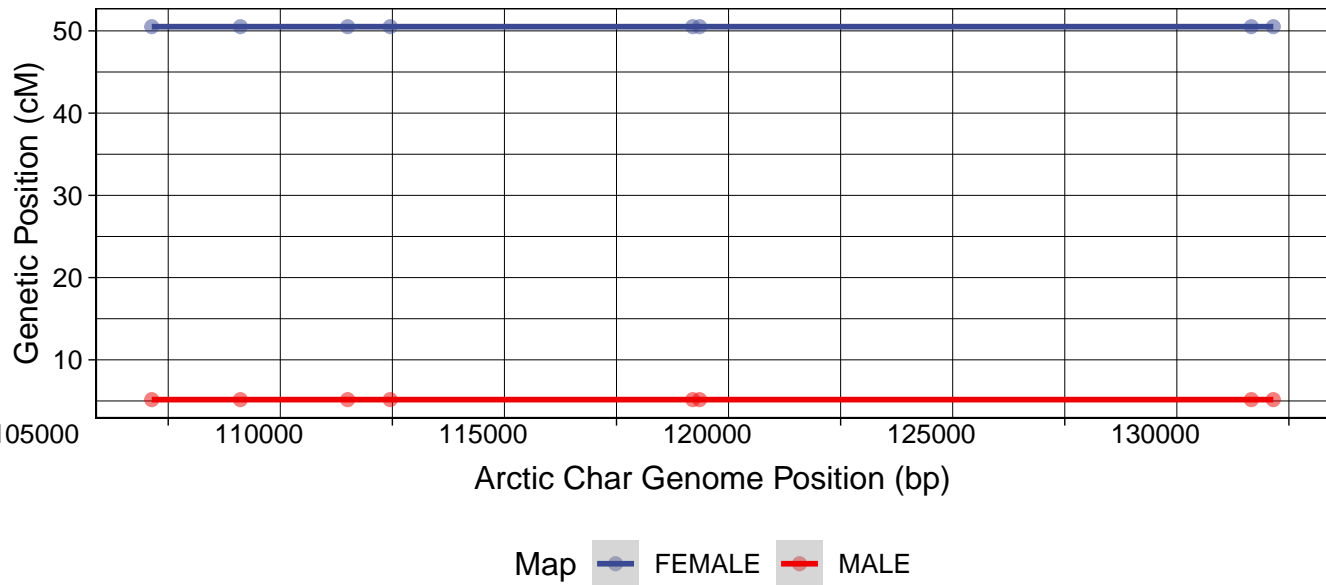

sna17 vs. NC\_036848.1

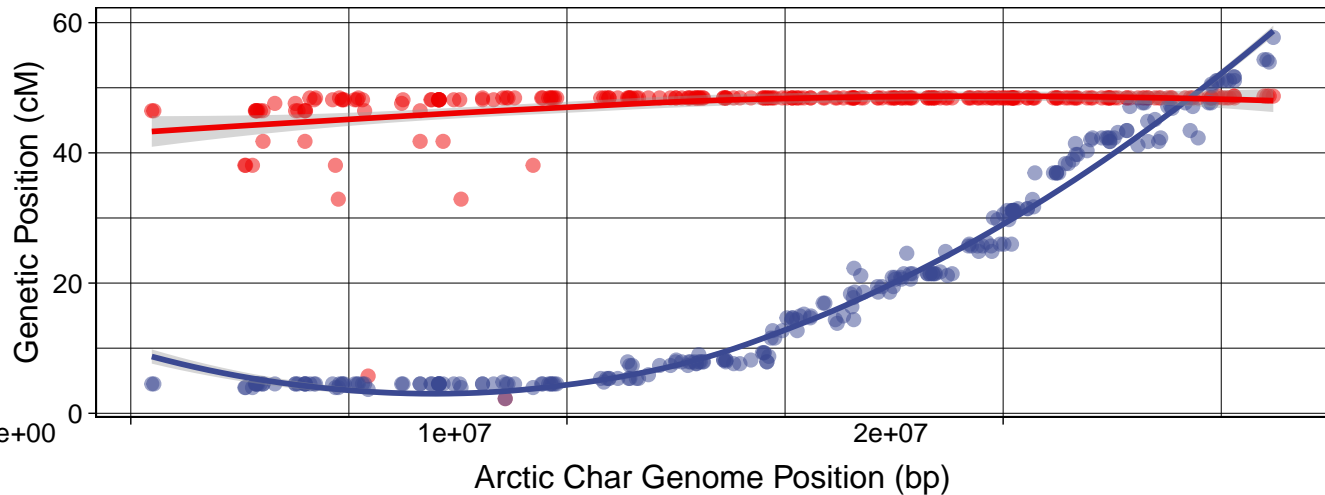

sna17 vs. NC\_036846.1

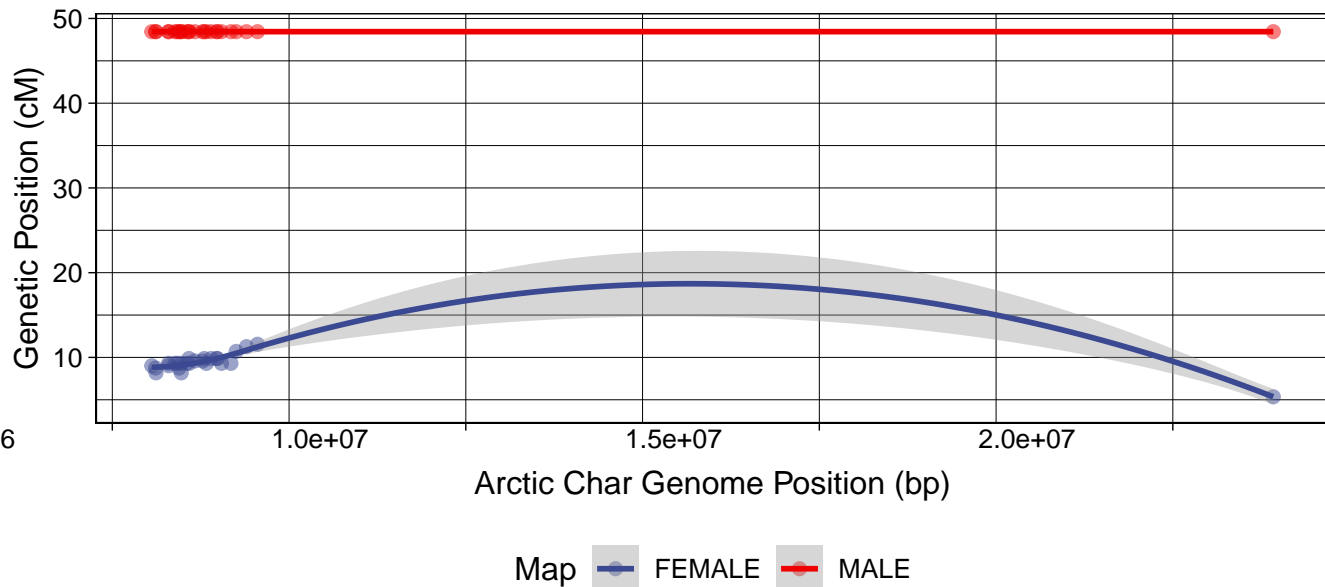

sna18 vs. NC\_036872.1

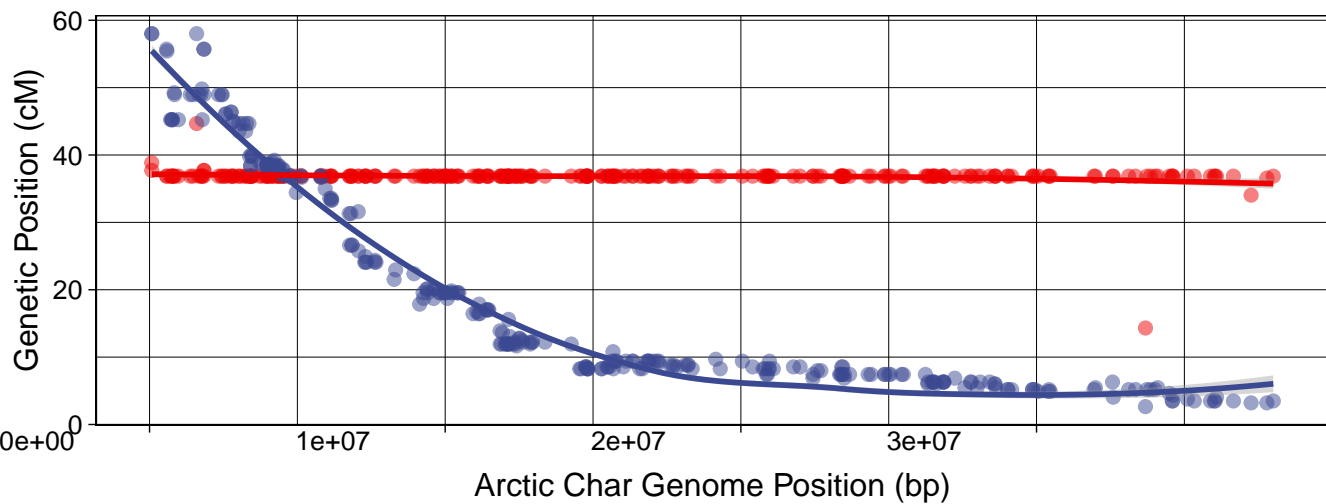

sna18 vs. NC\_036855.1

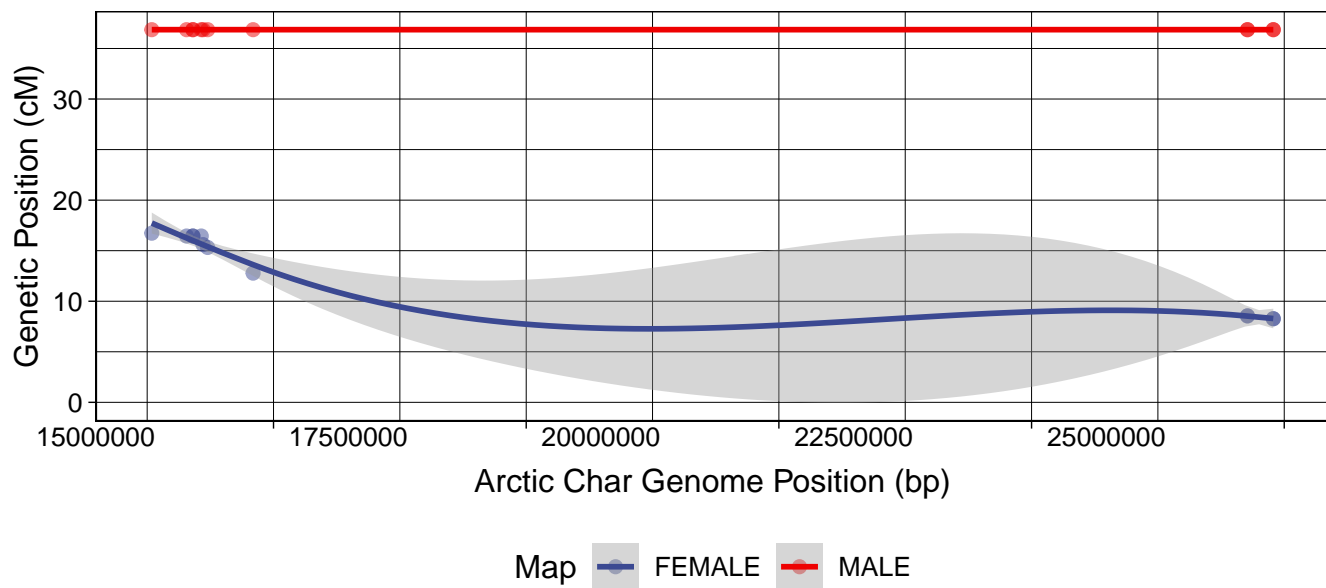

sna19 vs. NC\_036875.1

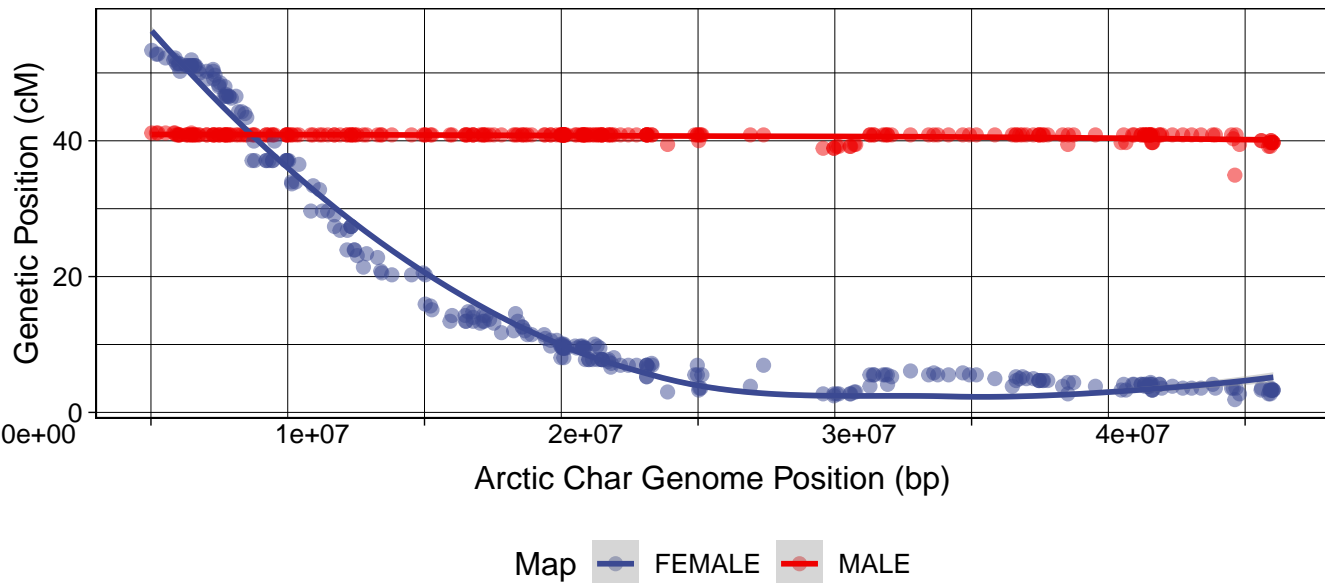

sna19 vs. NC\_036839.1

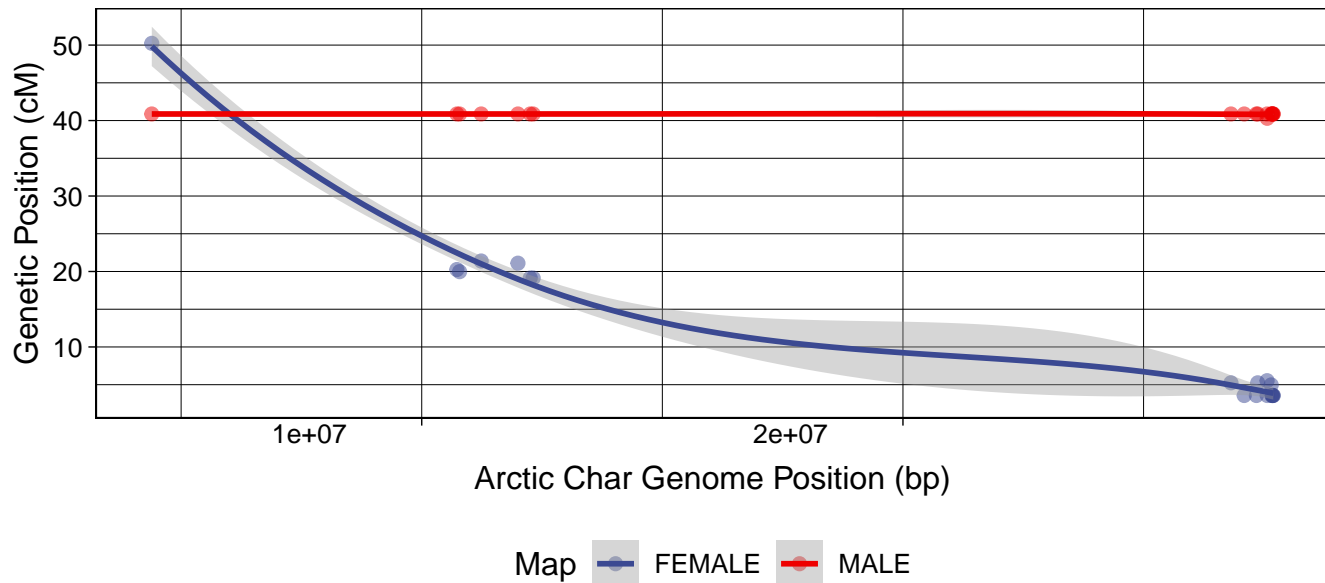

sna20 vs. NC\_036851.1

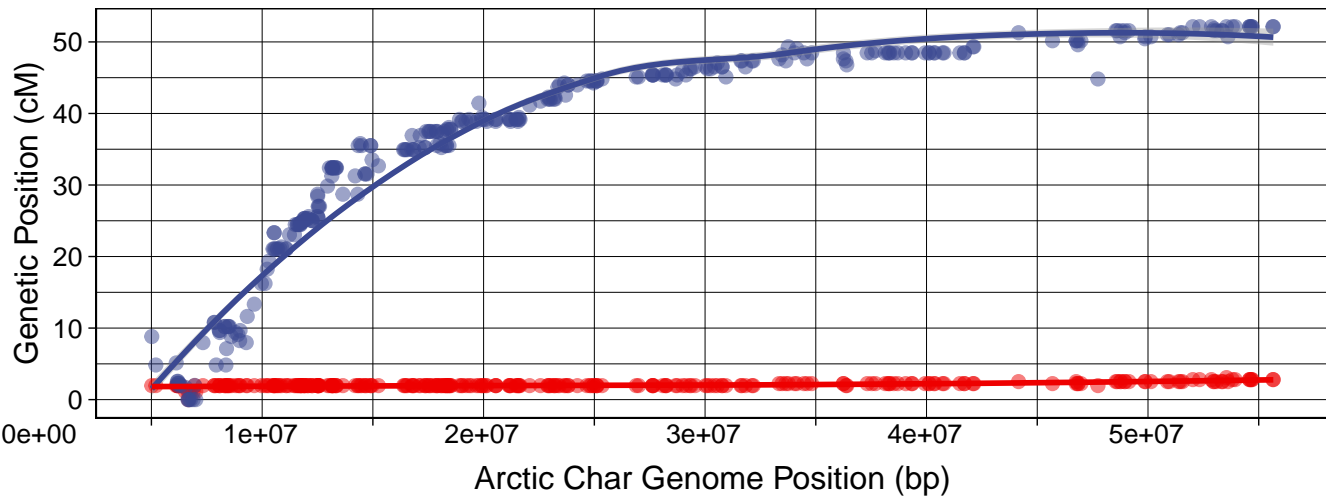

sna20 vs. NW\_019942923.1

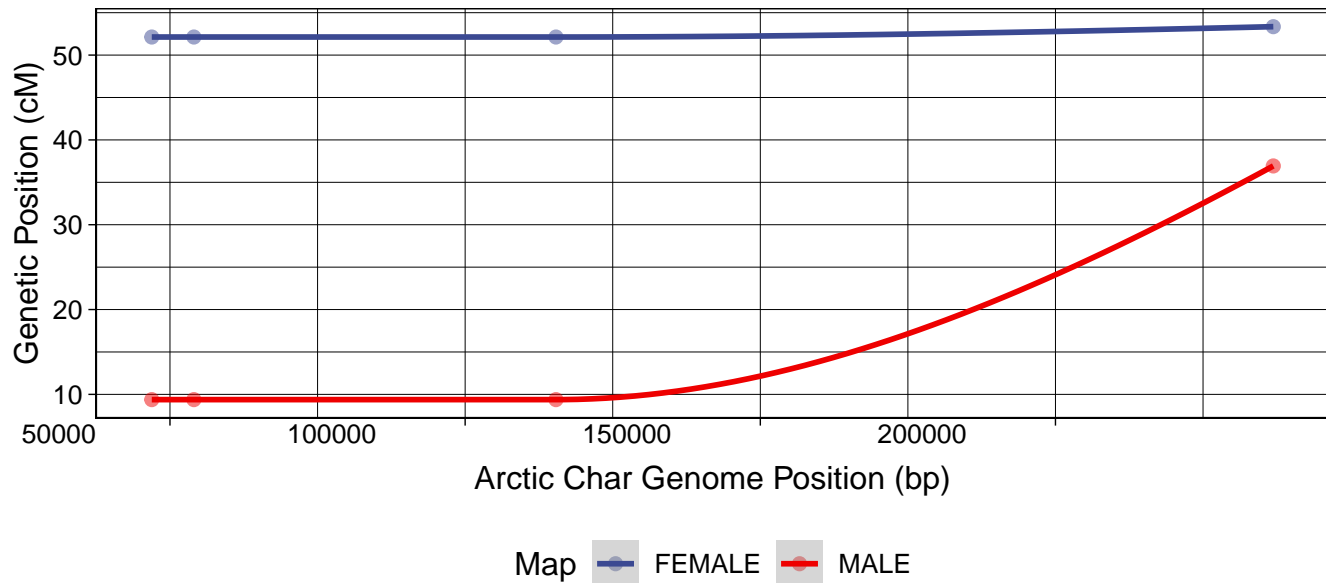

sna21 vs. NC\_036842.1

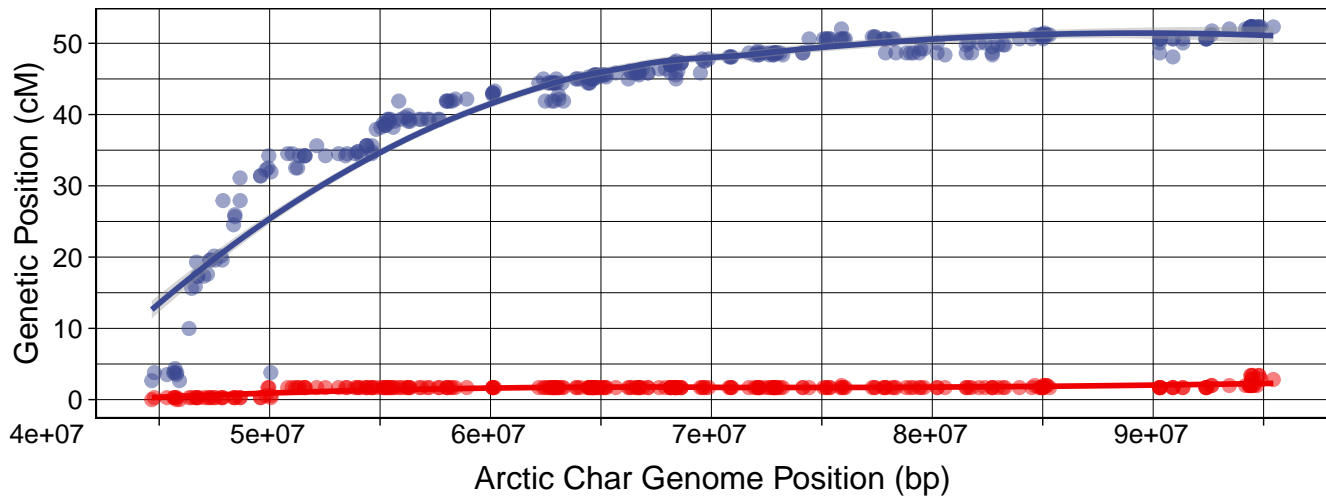

sna21 vs. NW\_019942779.1

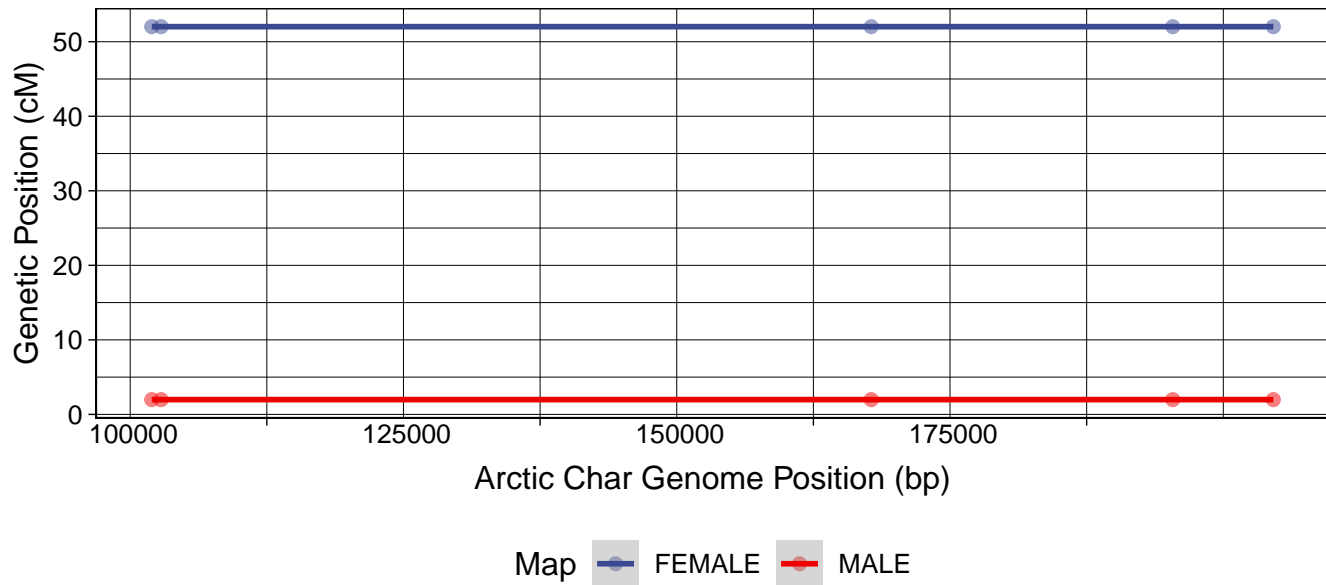

sna22 vs. NC\_036865.1

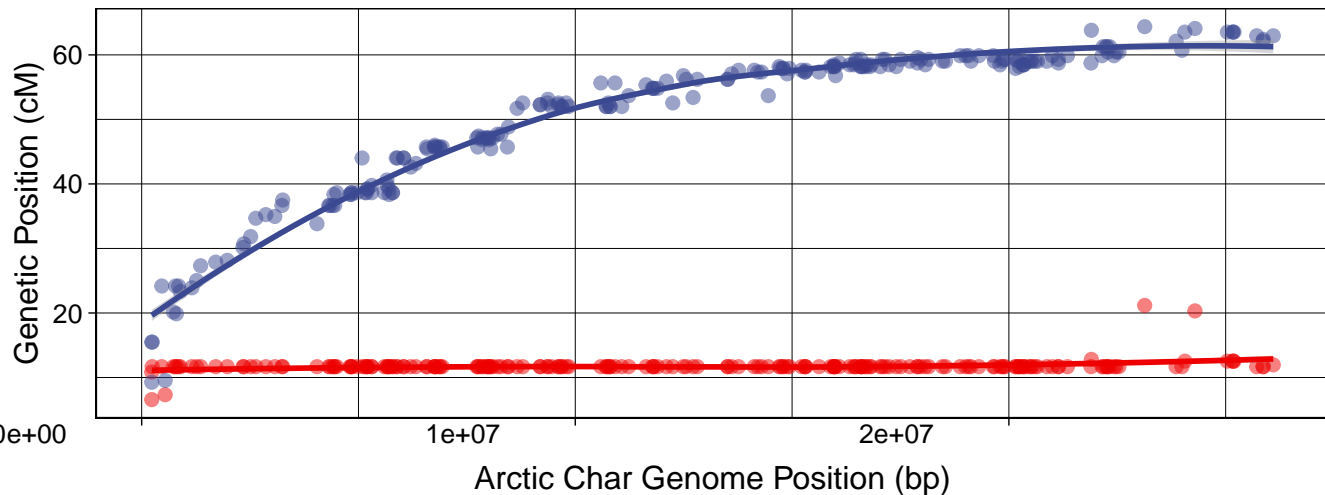

sna22 vs. NC\_036858.1

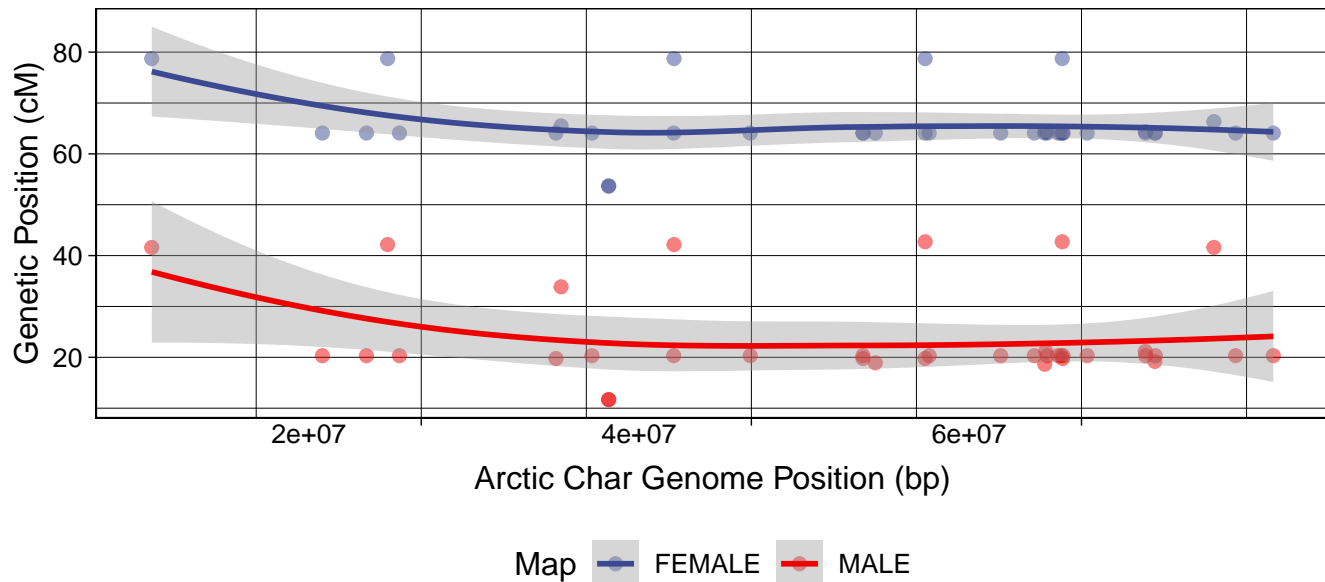

sna23 vs. NC\_036862.1

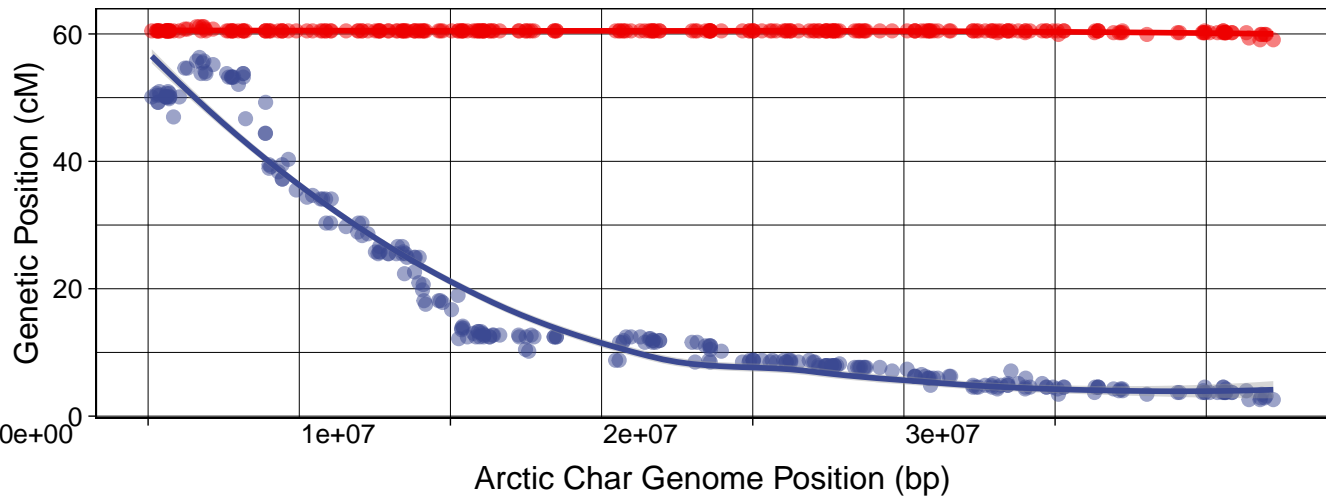

sna23 vs. NW\_019943239.1

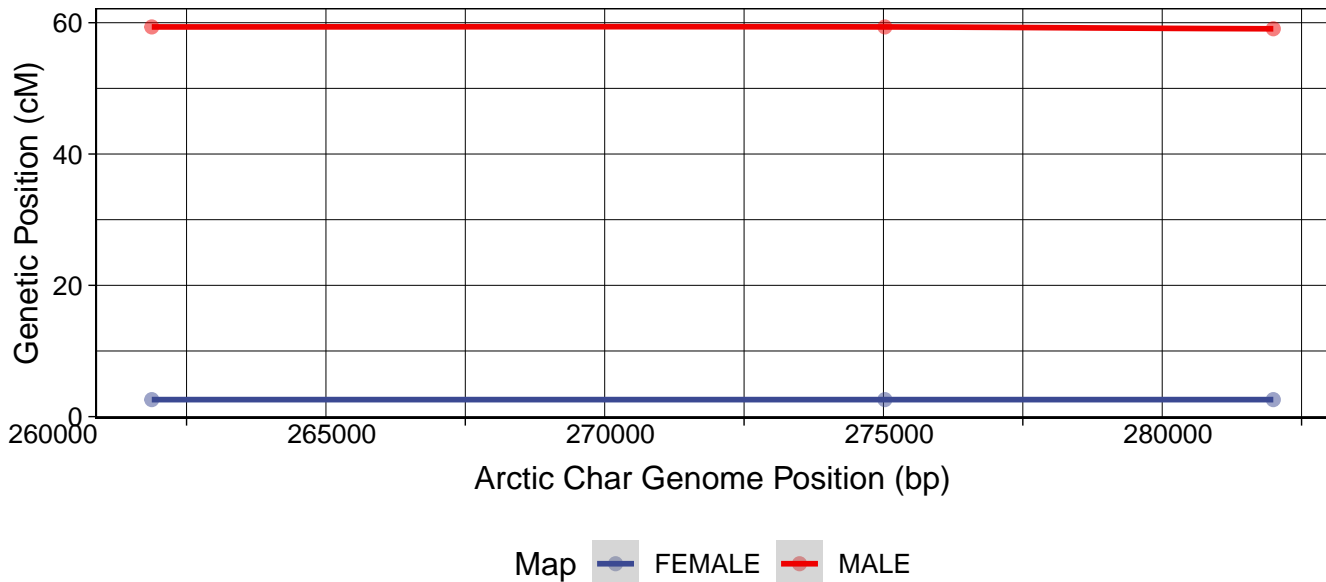



sna24 vs. NC\_036854.1

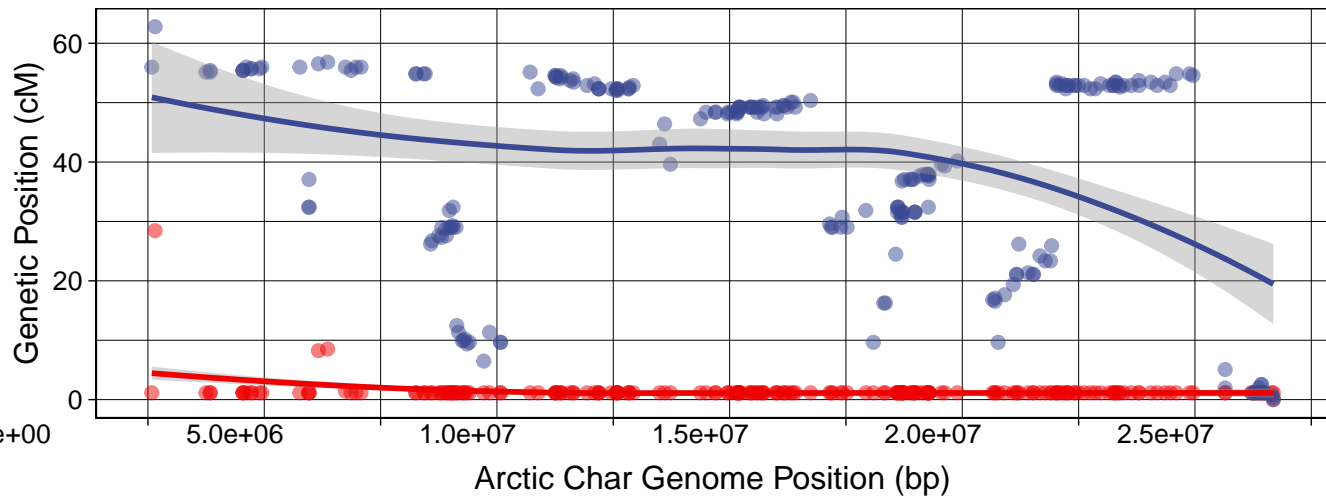

sna24 vs. NW\_019942639.1

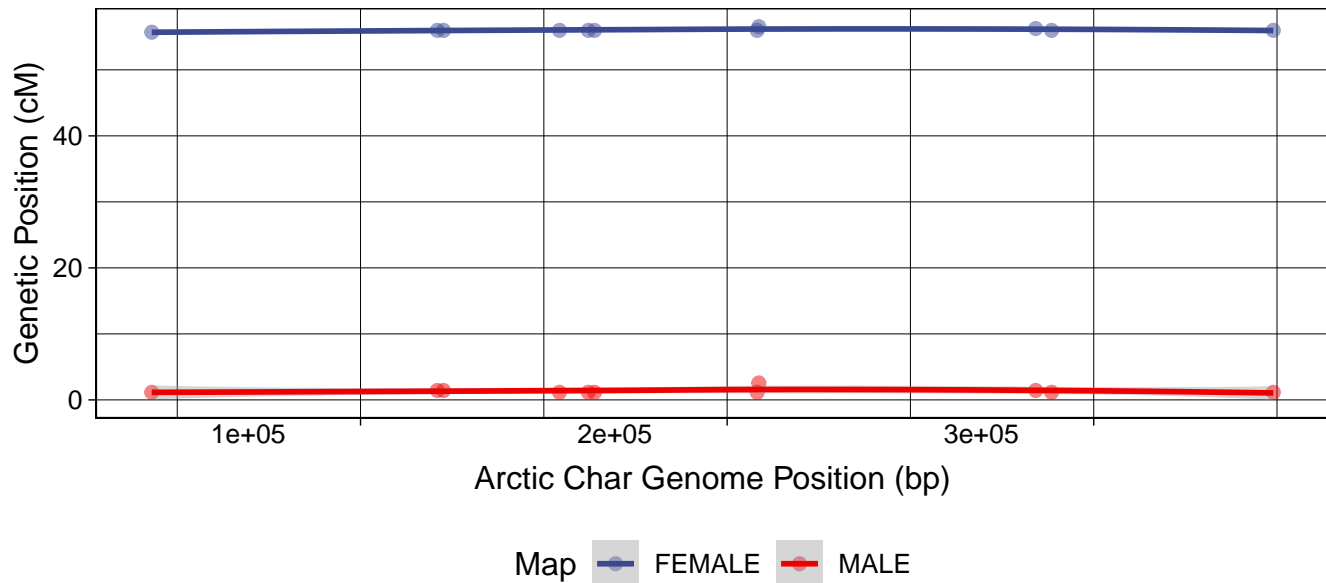

sna25 vs. NC\_036859.1

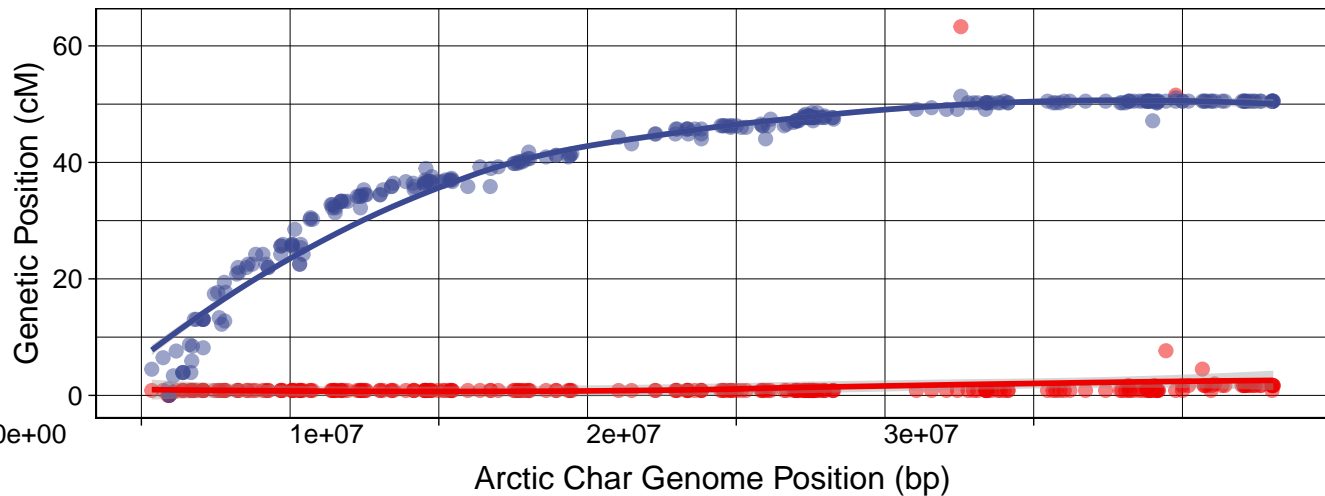

sna25 vs. NC\_036871.1

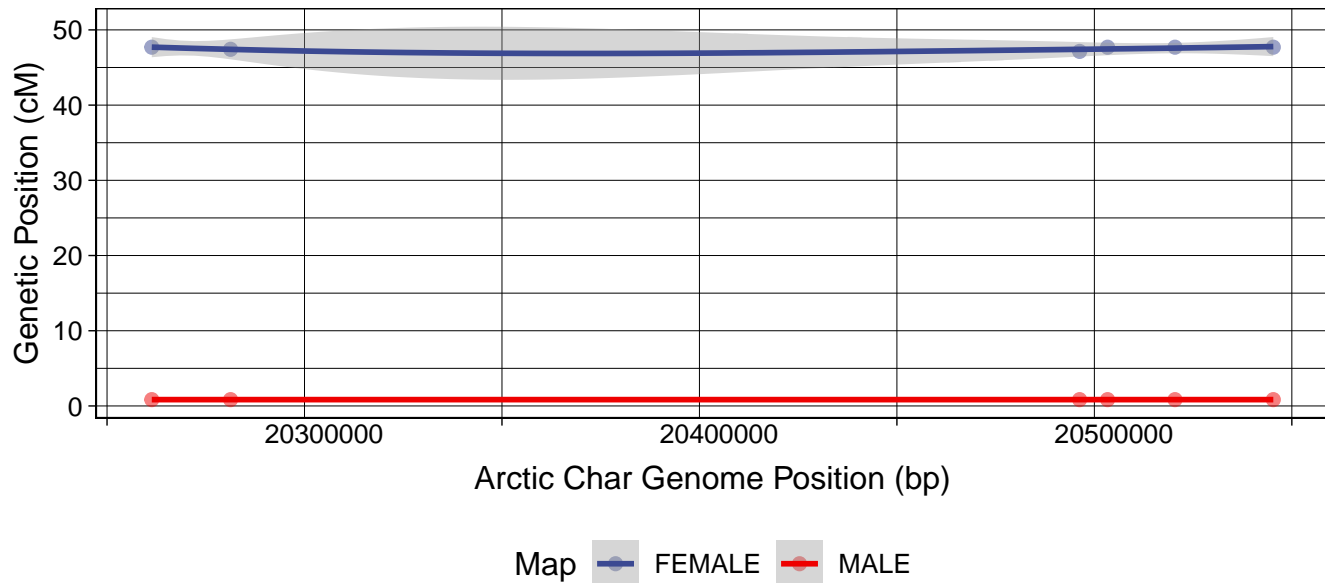

sna26 vs. NC\_036844.1

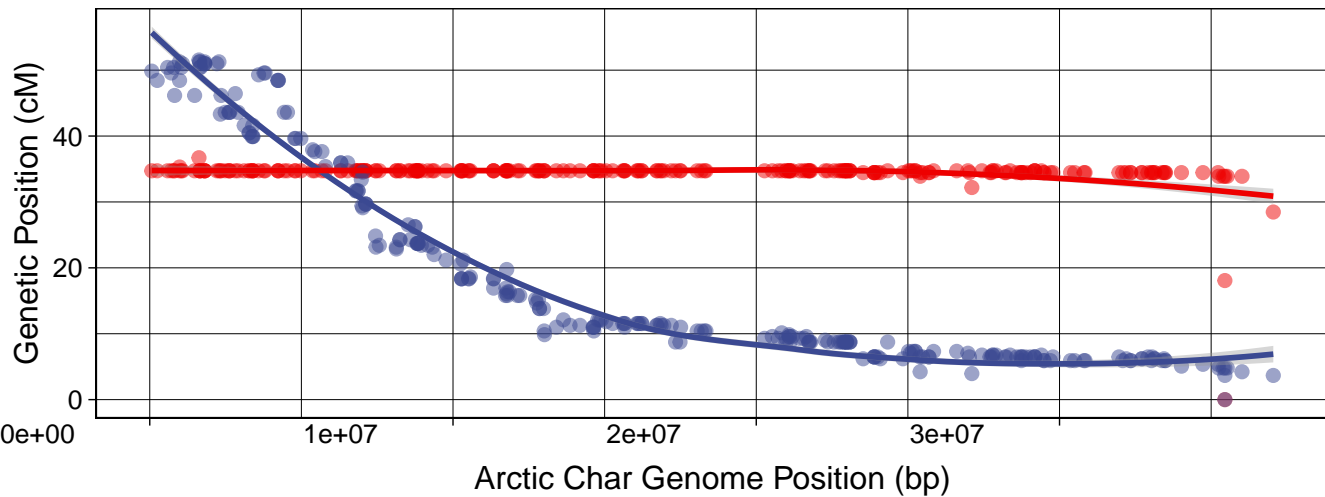

sna26 vs. NW\_019957576.1

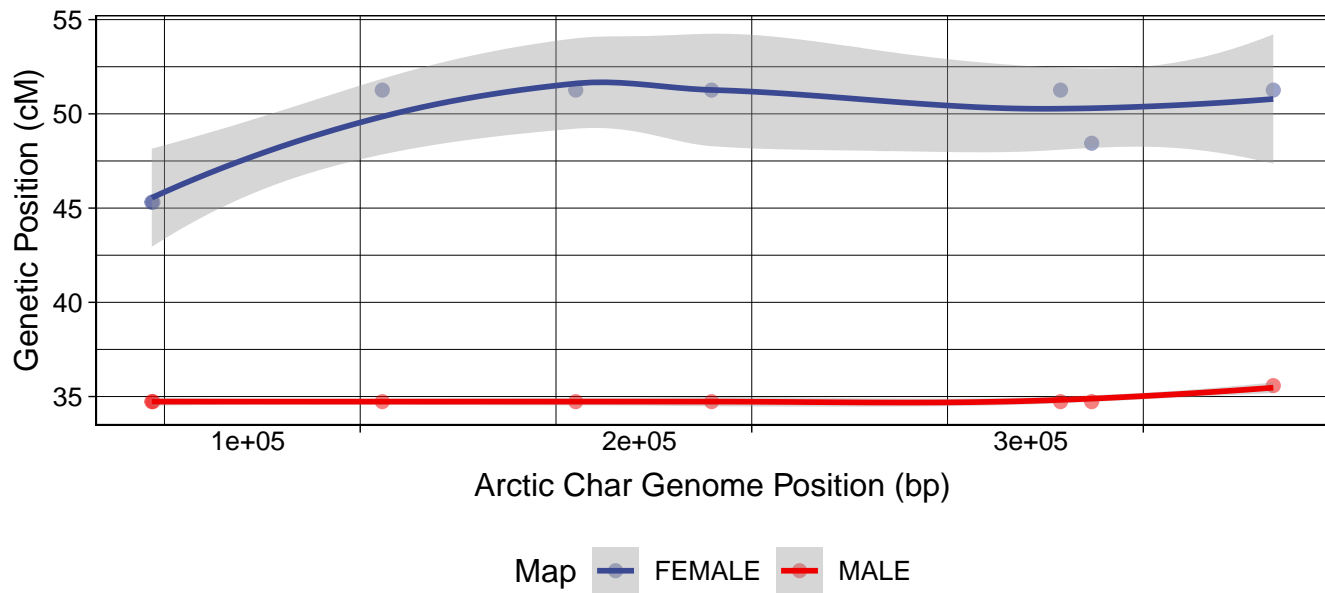

sna27 vs. NC\_036870.1

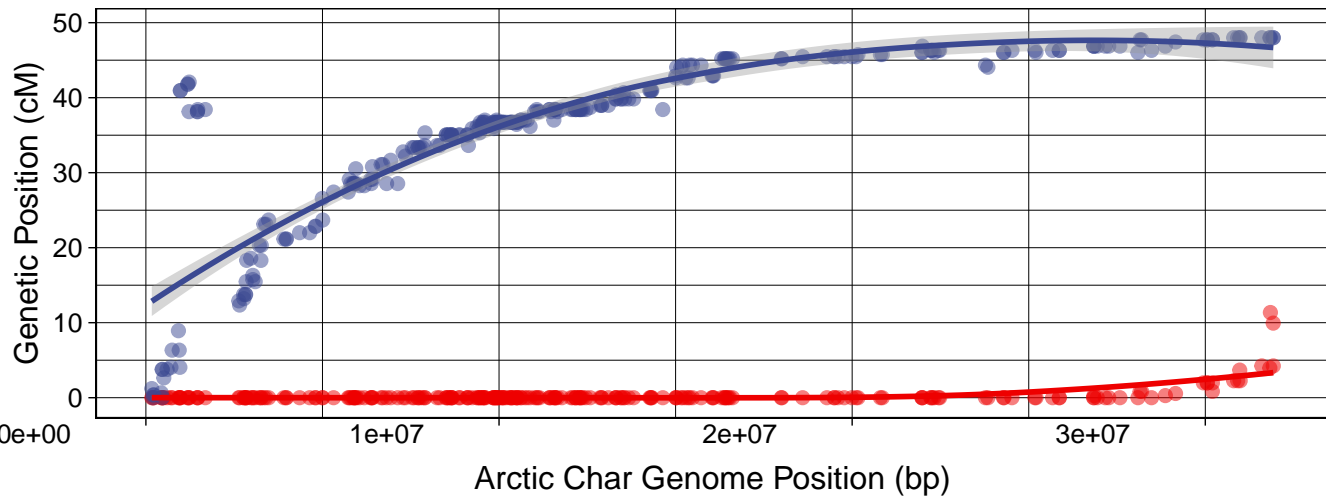

sna27 vs. NW\_019942677.1

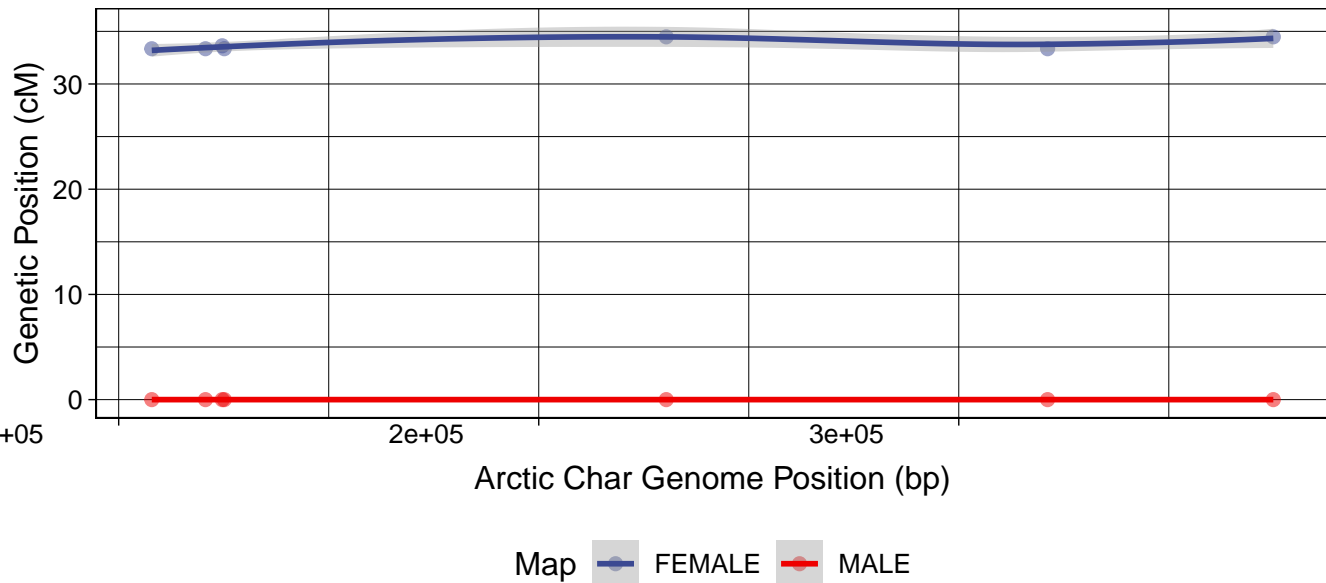

sna28 vs. NC\_036843.1

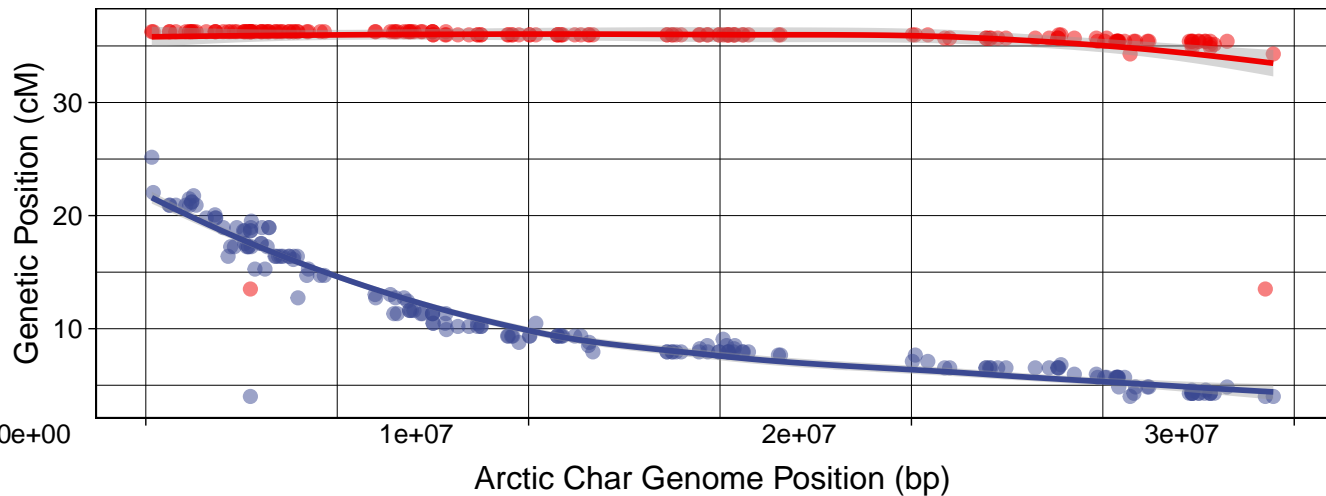

sna28 vs. NW\_019942514.1

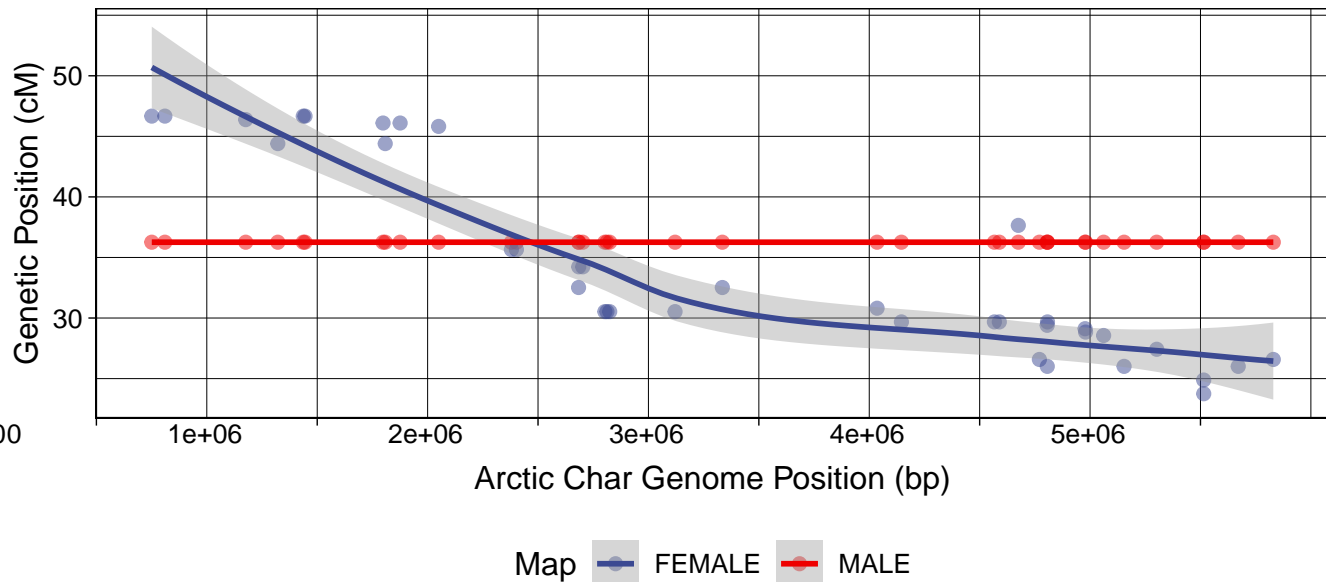

sna29 vs. NC\_036868.1

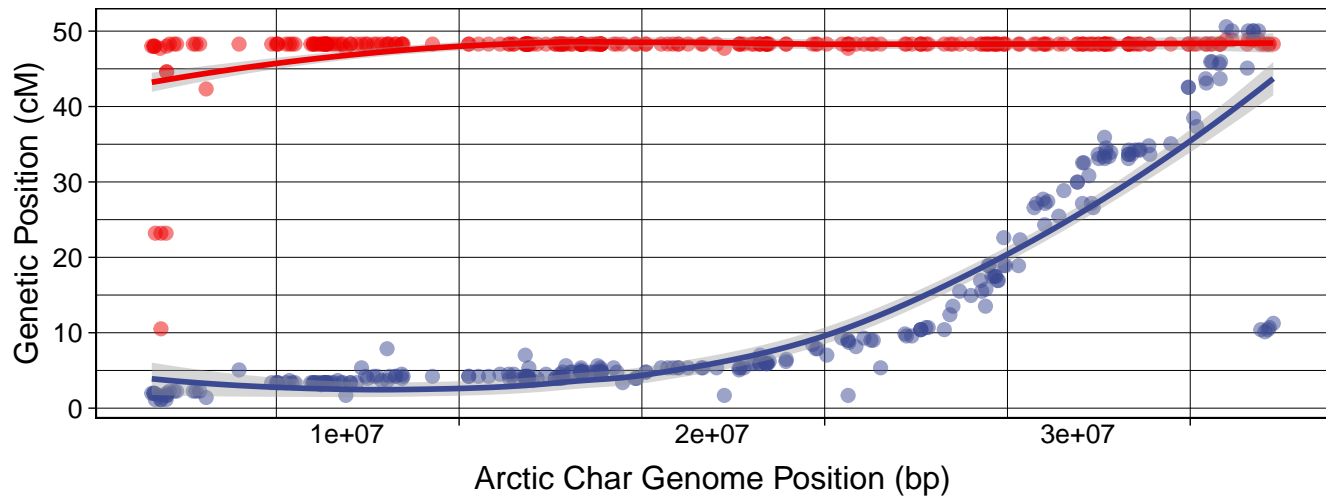

sna29 vs. NW\_019943177.1

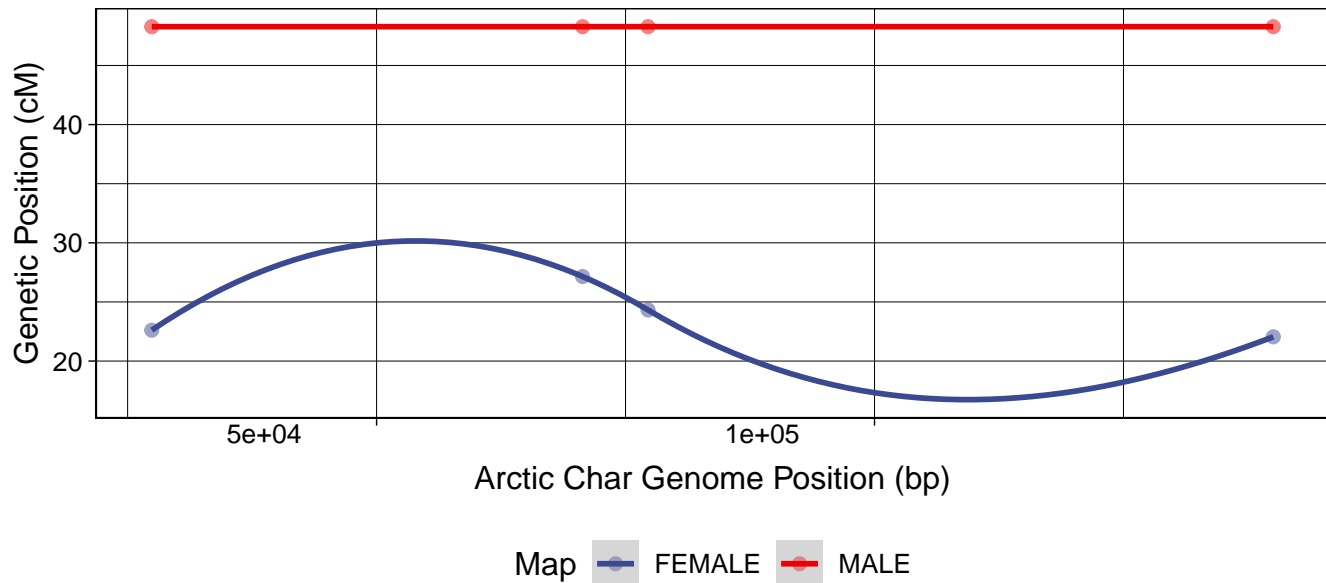

sna30 vs. NC\_036850.1

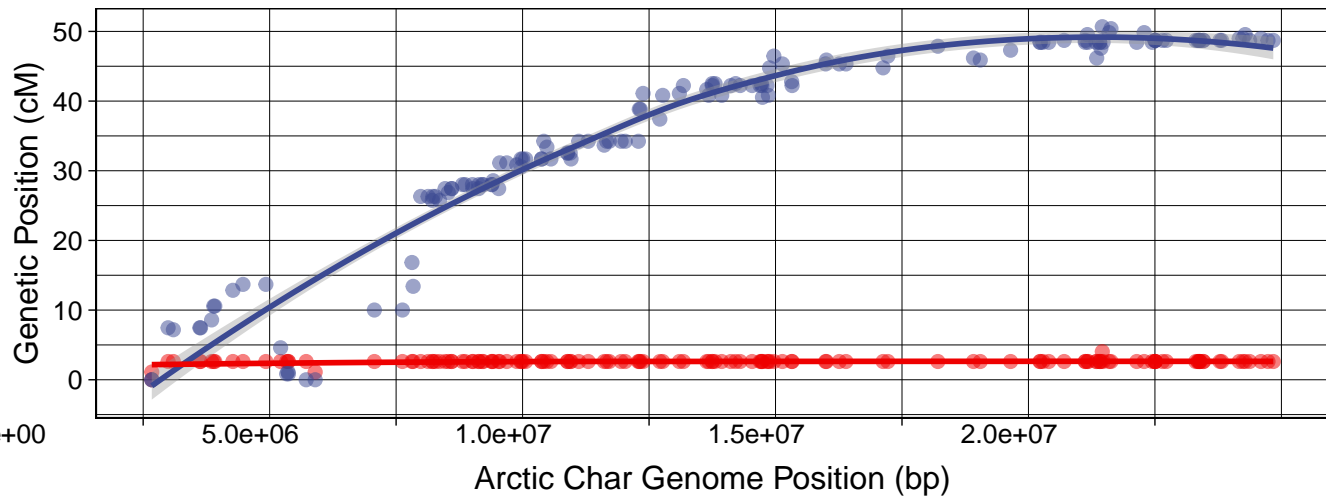

sna30 vs. NC\_036855.1

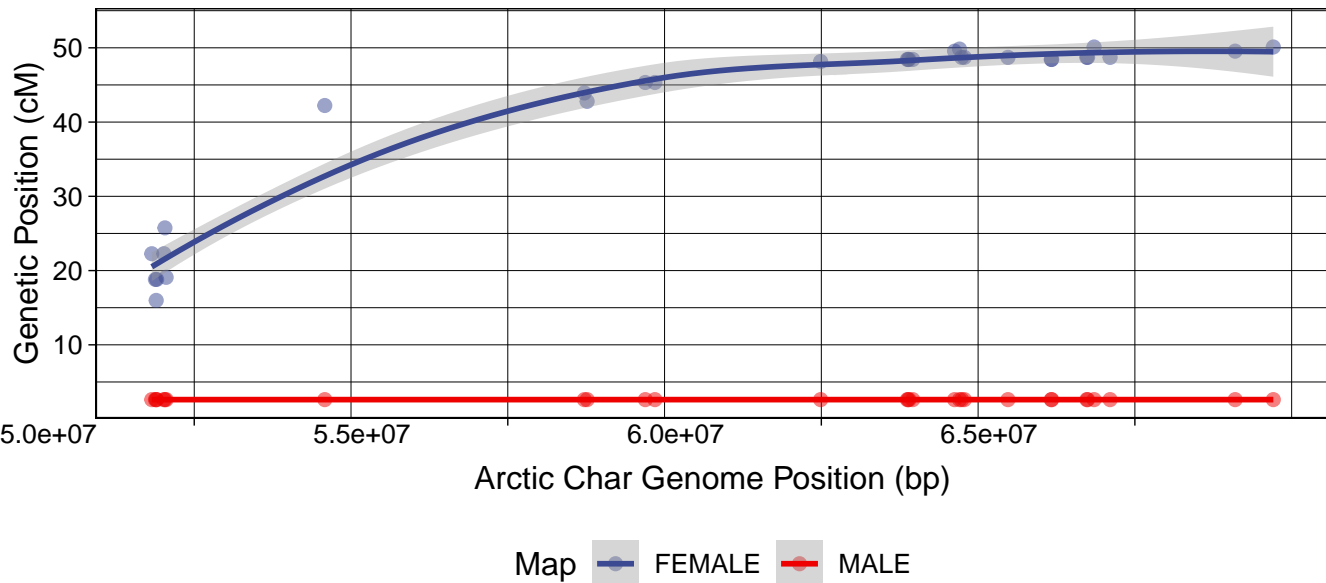

sna31 vs. NC\_036842.1

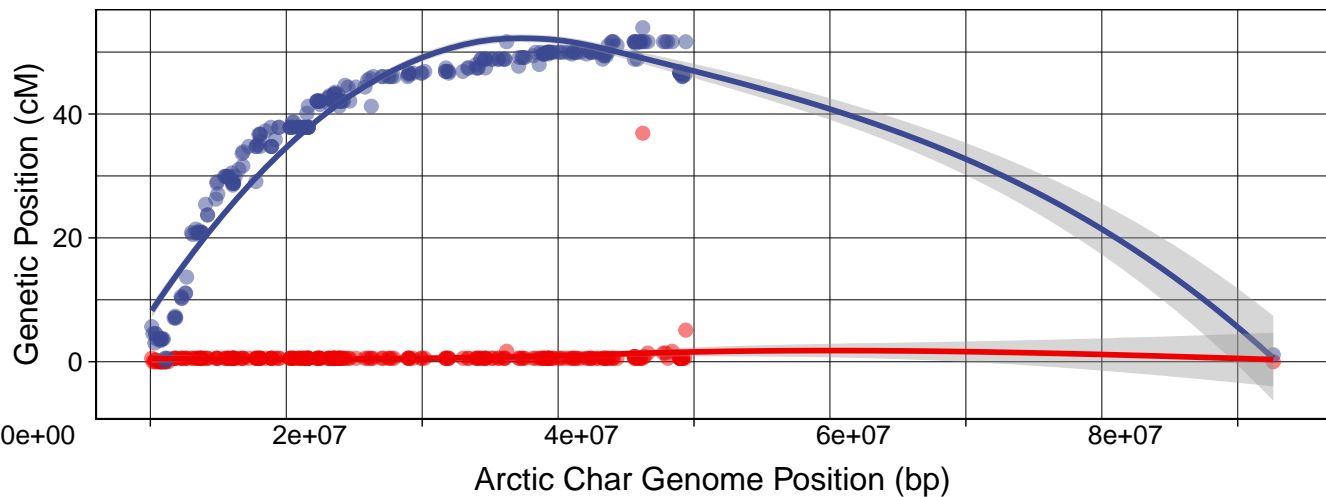

sna31 vs. NW\_019943276.1

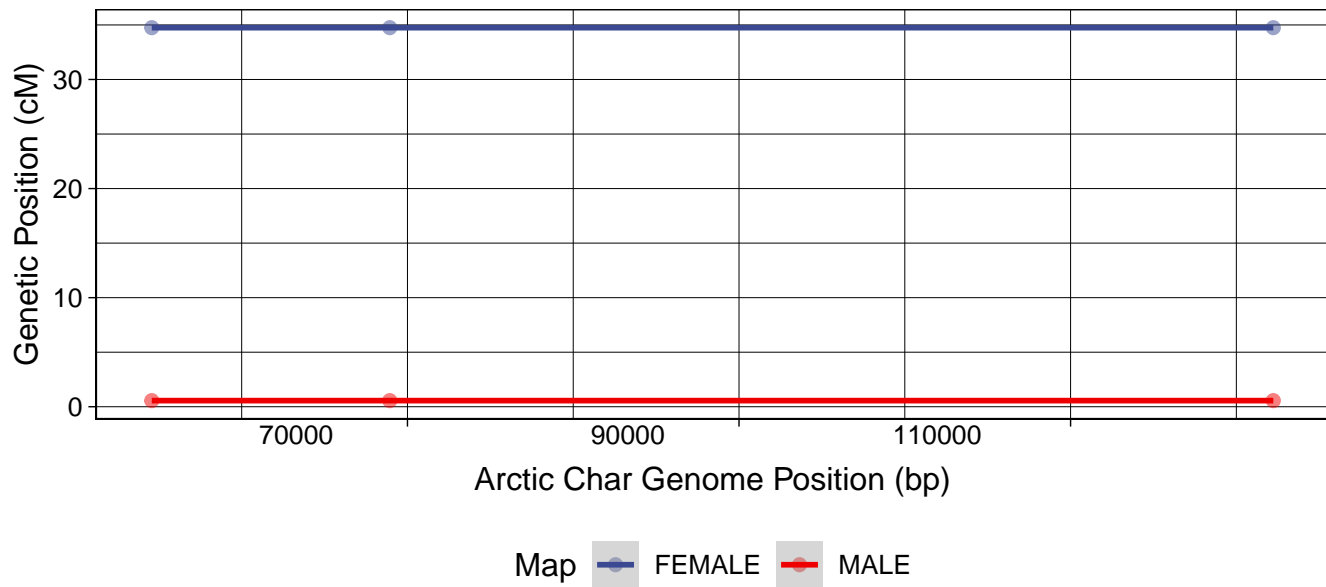



sna32 vs. NC\_036869.1

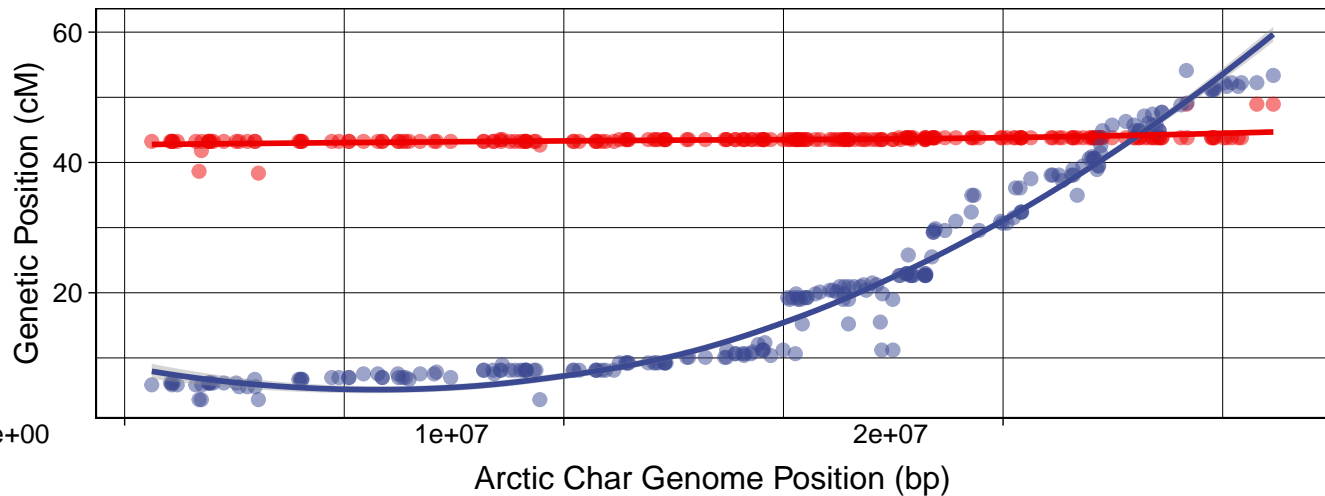

sna32 vs. NC\_036872.1

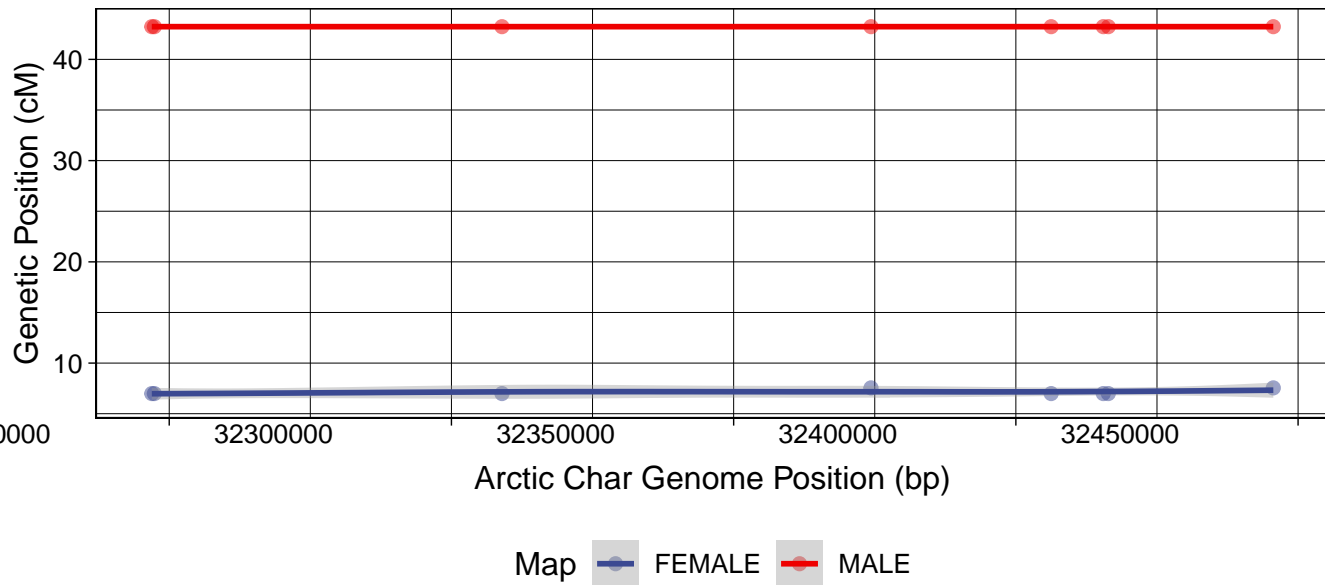

sna33 vs. NC\_036854.1

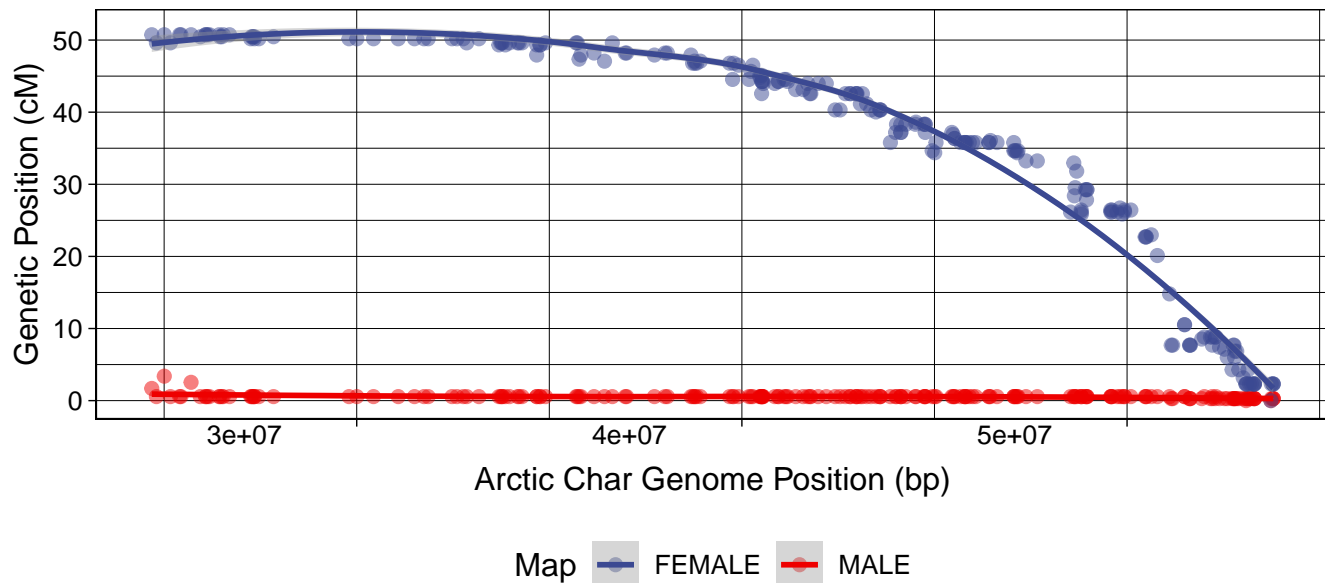

sna33 vs. NW\_019943194.1

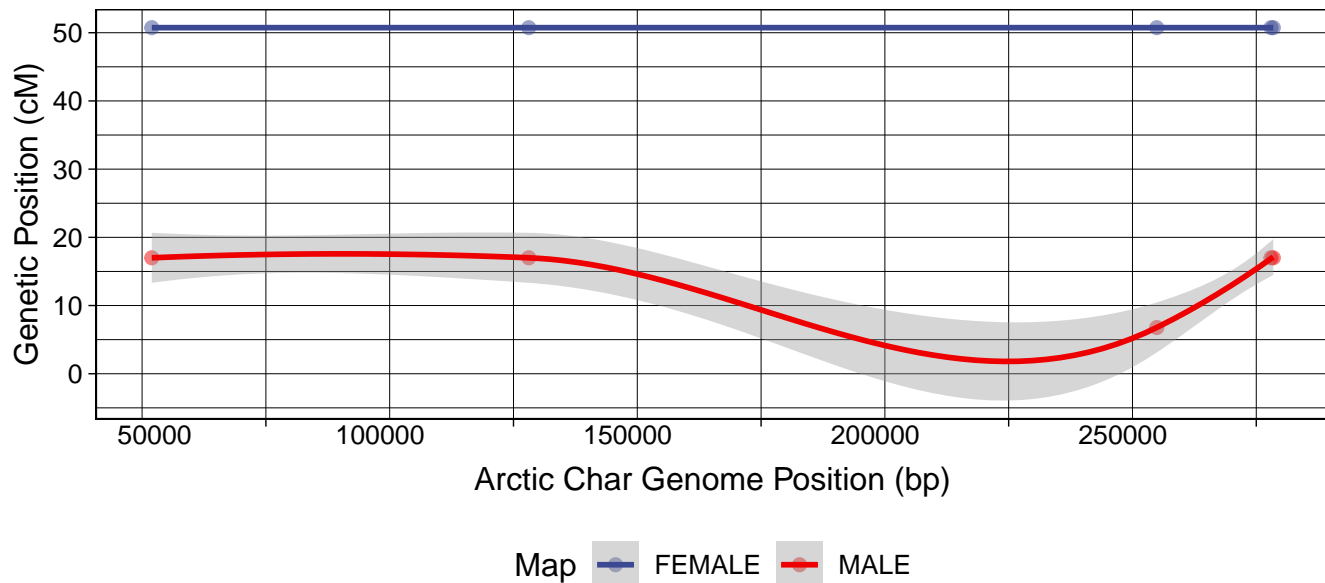

sna34 vs. NC\_036841.1

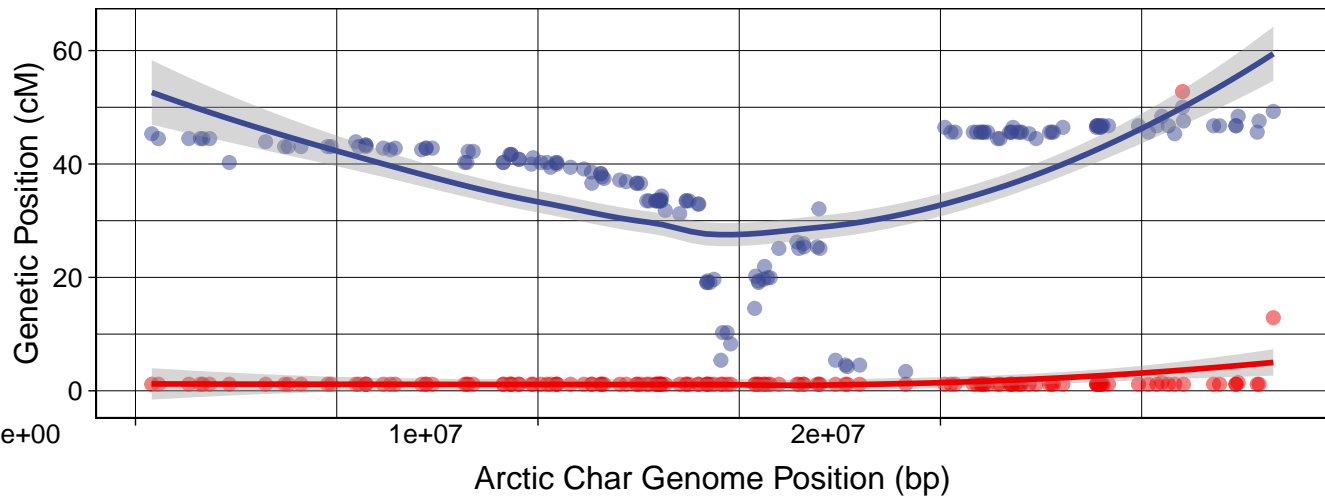

sna34 vs. NC\_036862.1

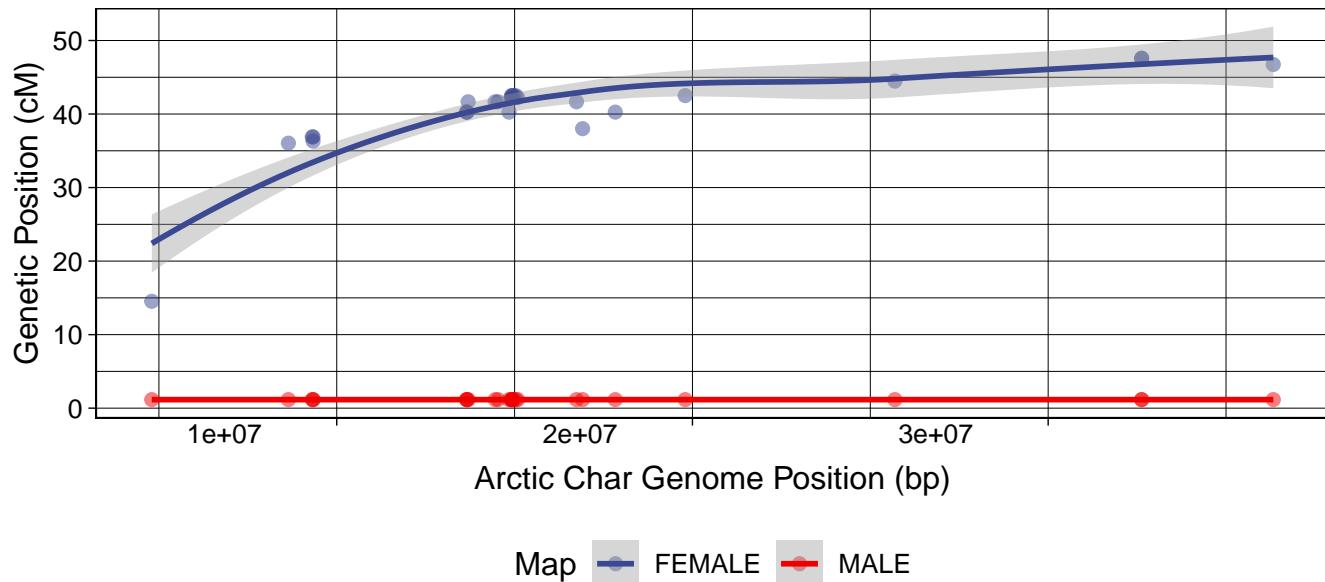

sna35 vs. NC\_036848.1

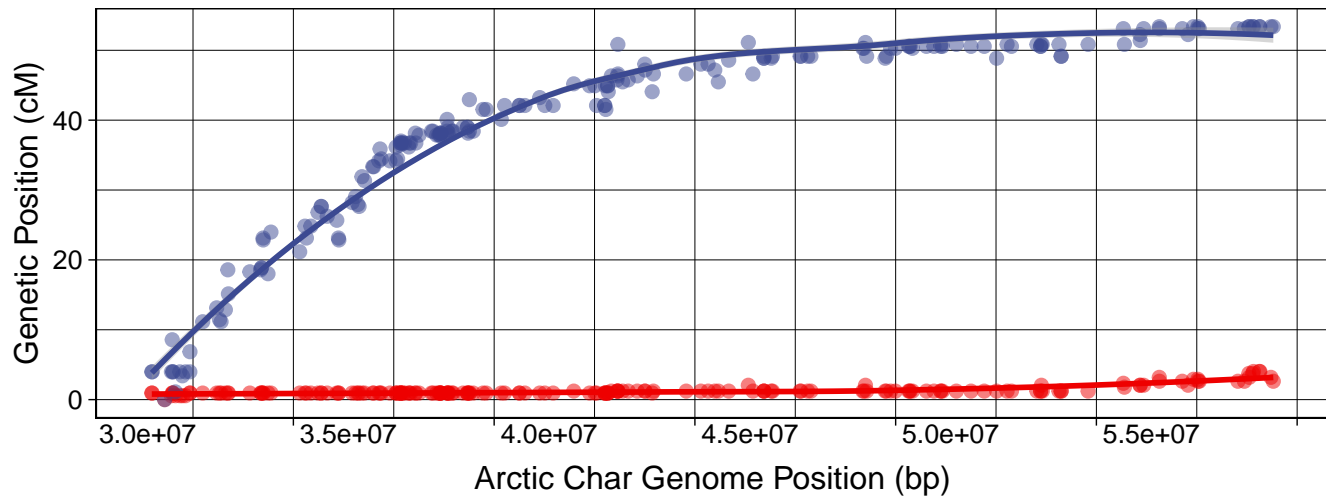

sna35 vs. NW\_019957534.1

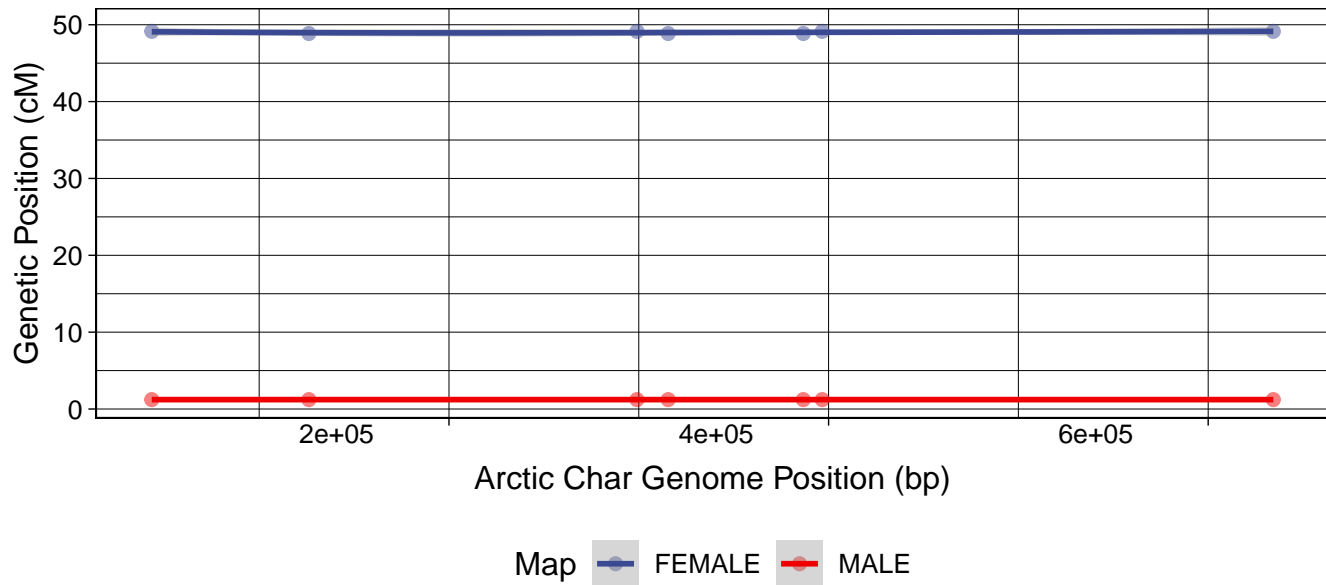

sna36 vs. NC\_036876.1

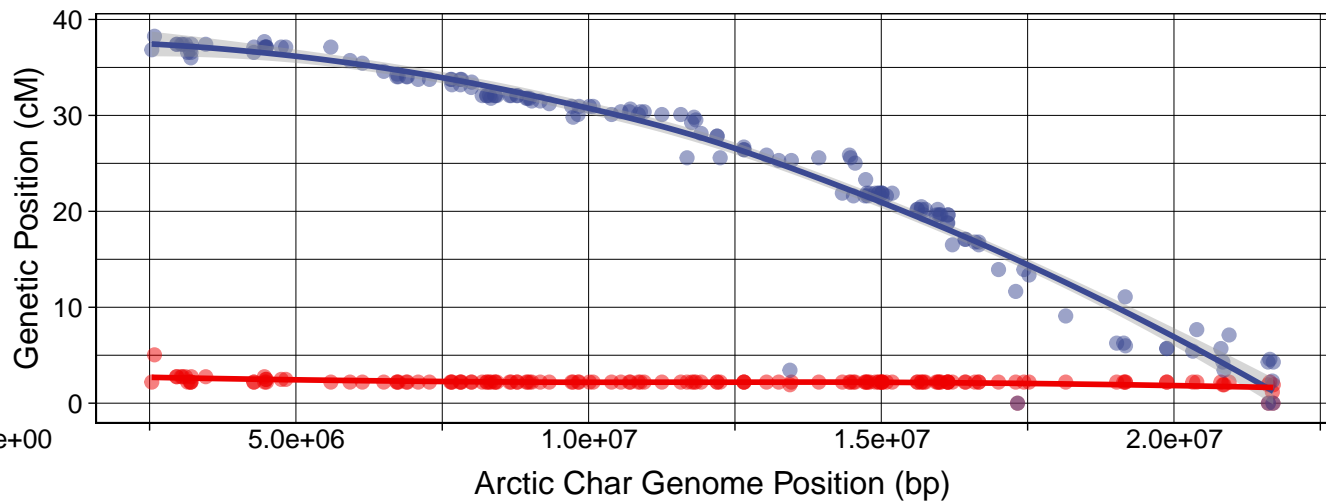

sna36 vs. NW\_019957672.1

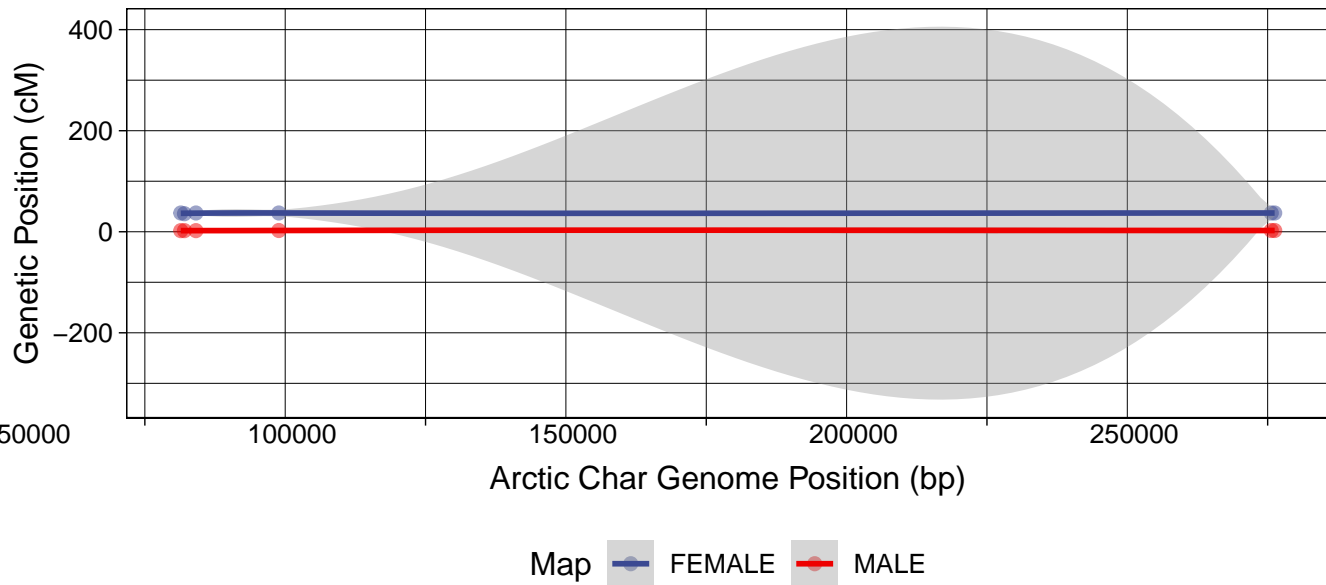

sna37 vs. NC\_036874.1

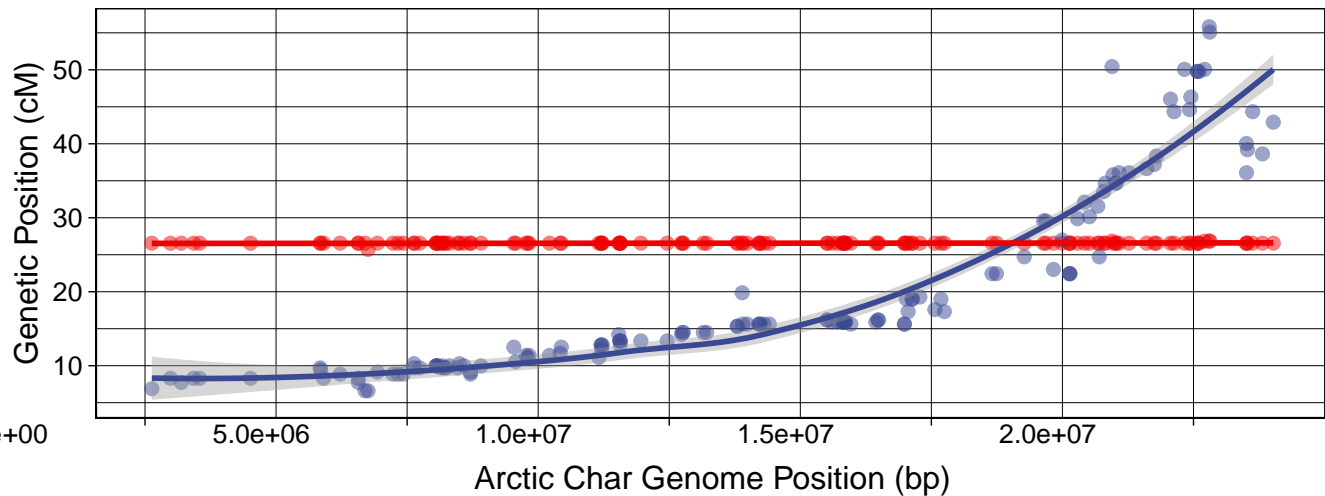

sna37 vs. NC\_036845.1

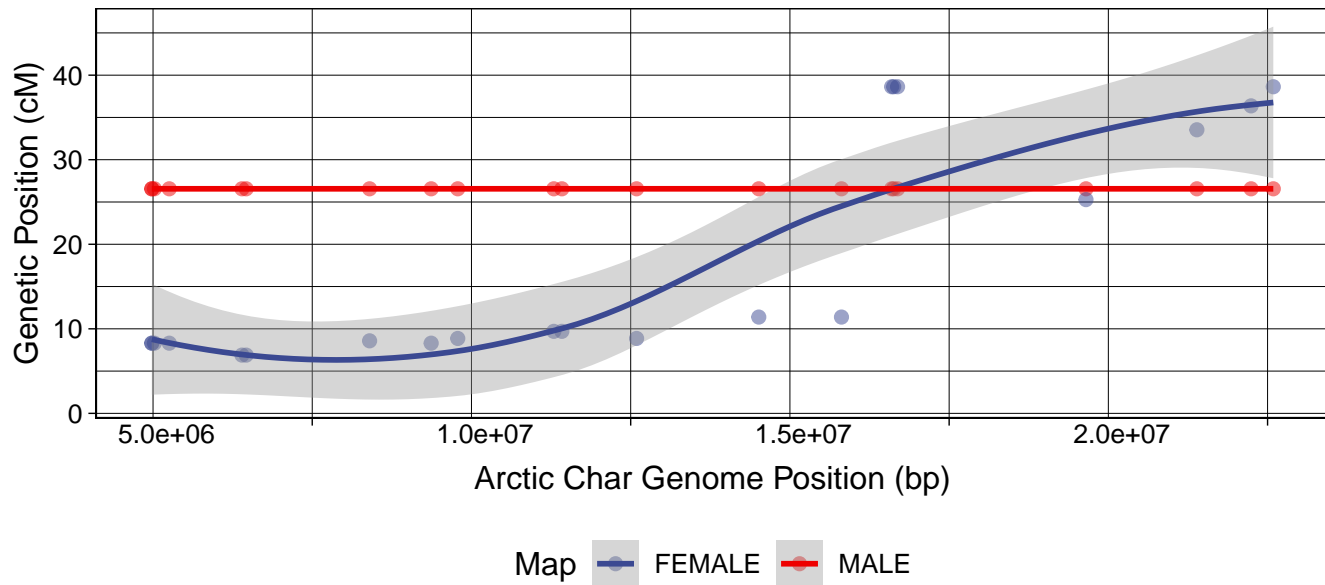

sna38 vs. NC\_036864.1

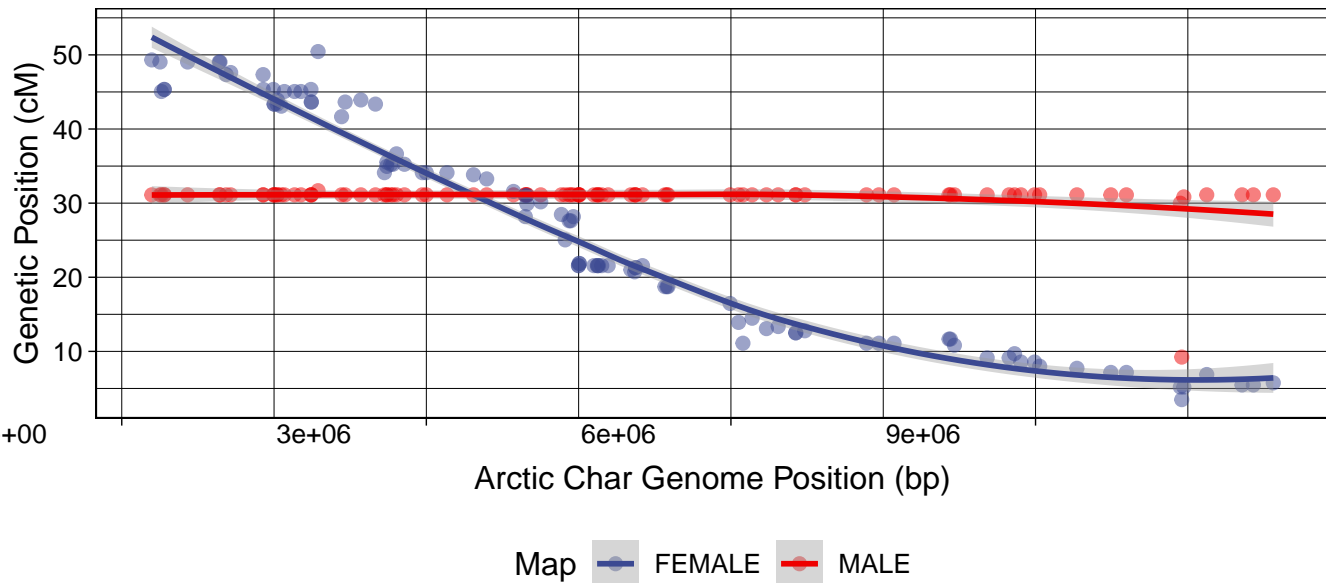

sna38 vs. NC\_036840.1

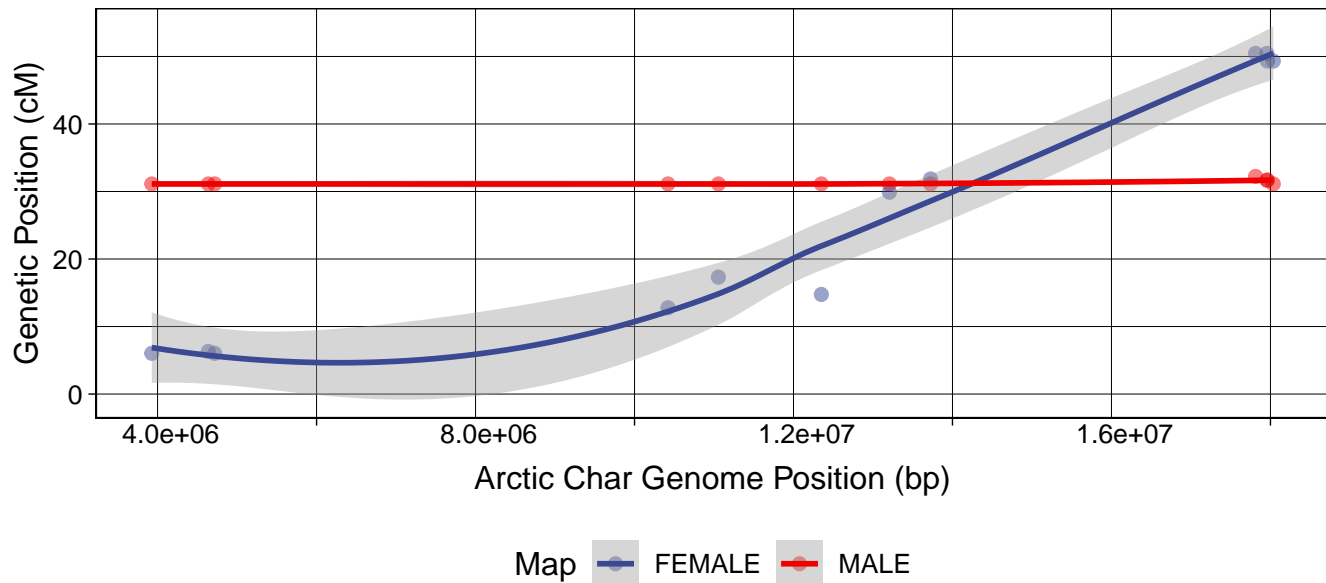

sna39 vs. NC\_036861.1

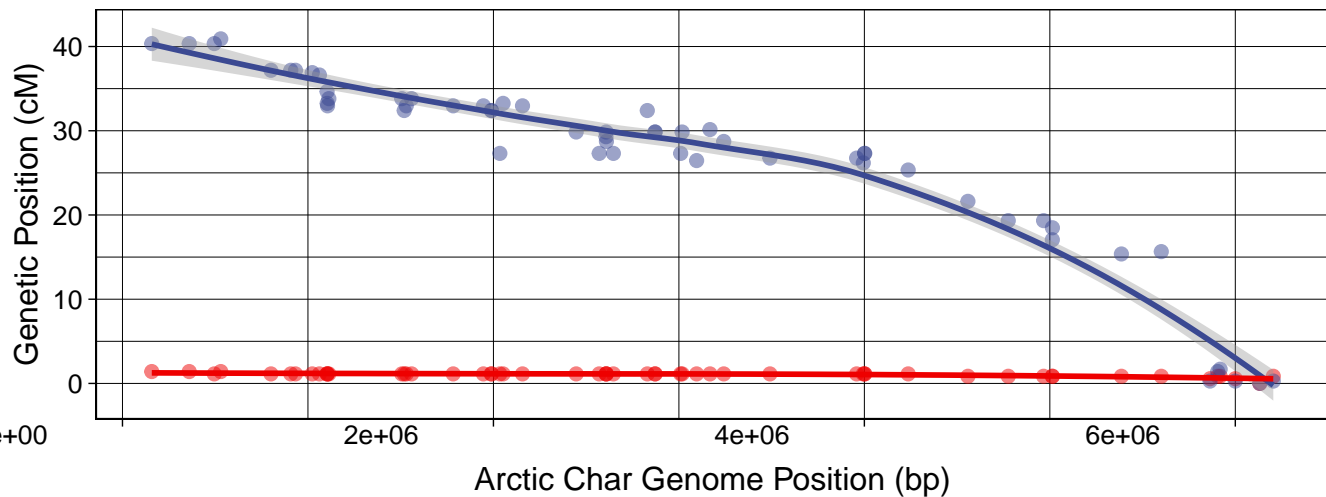

sna39 vs. NC\_036838.1

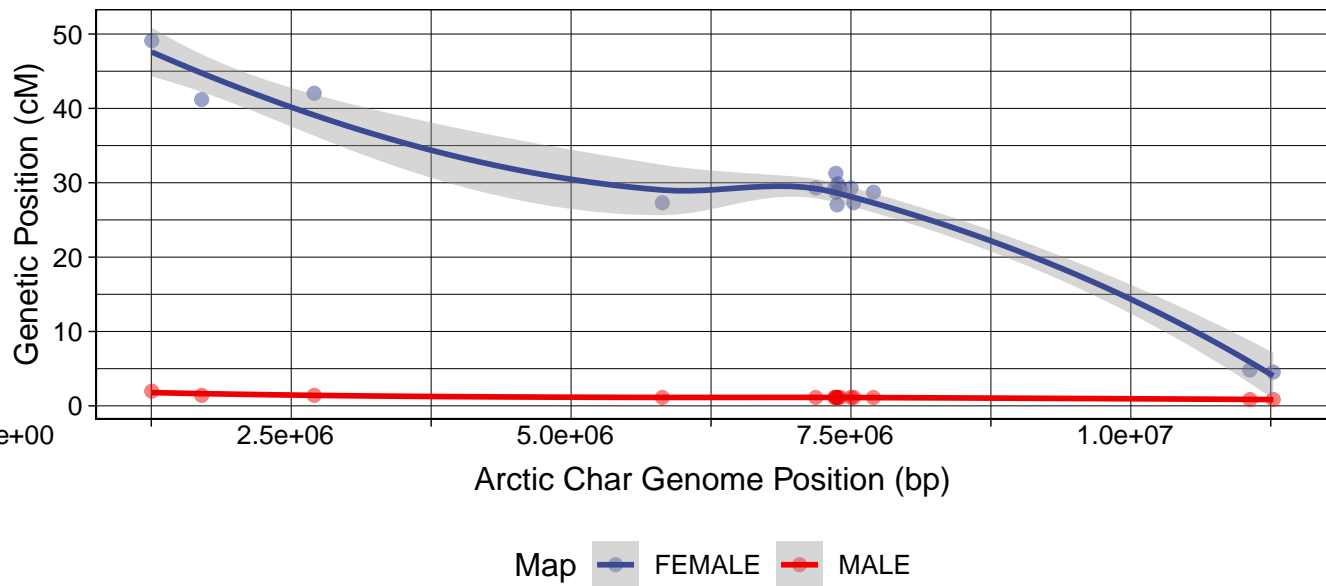



sna40 vs. NC\_036852.1

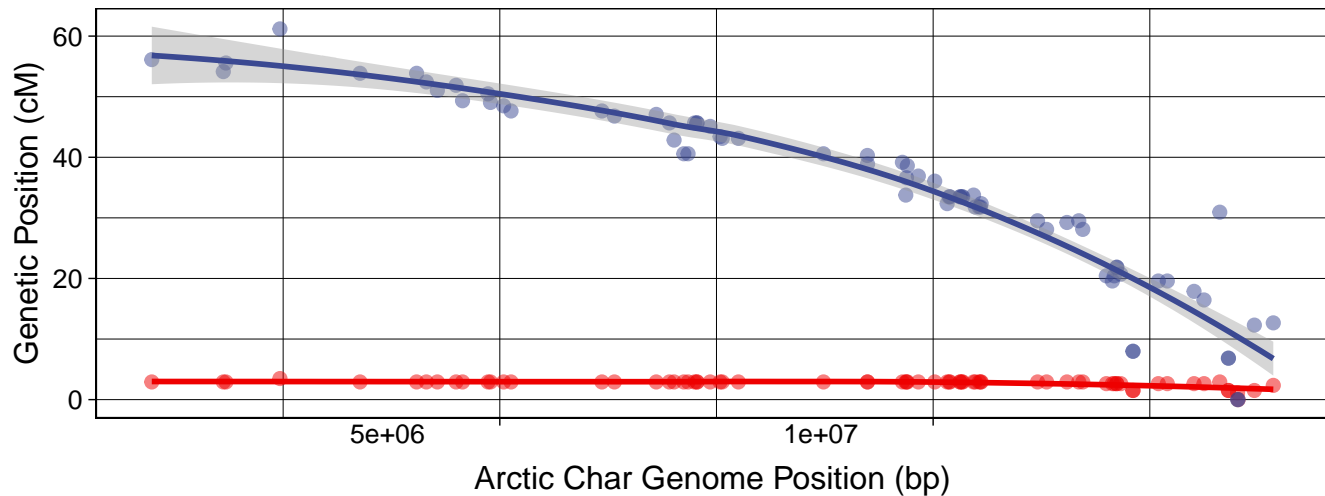

sna40 vs. NC\_036867.1

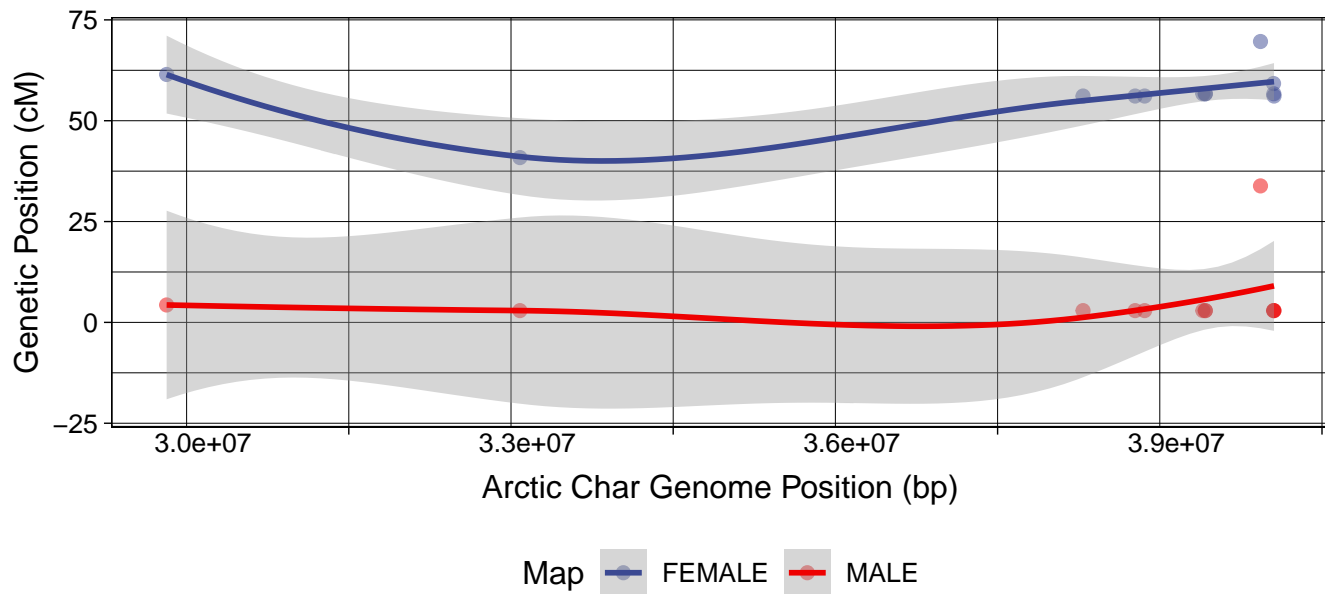

sna41 vs. NC\_036860.1

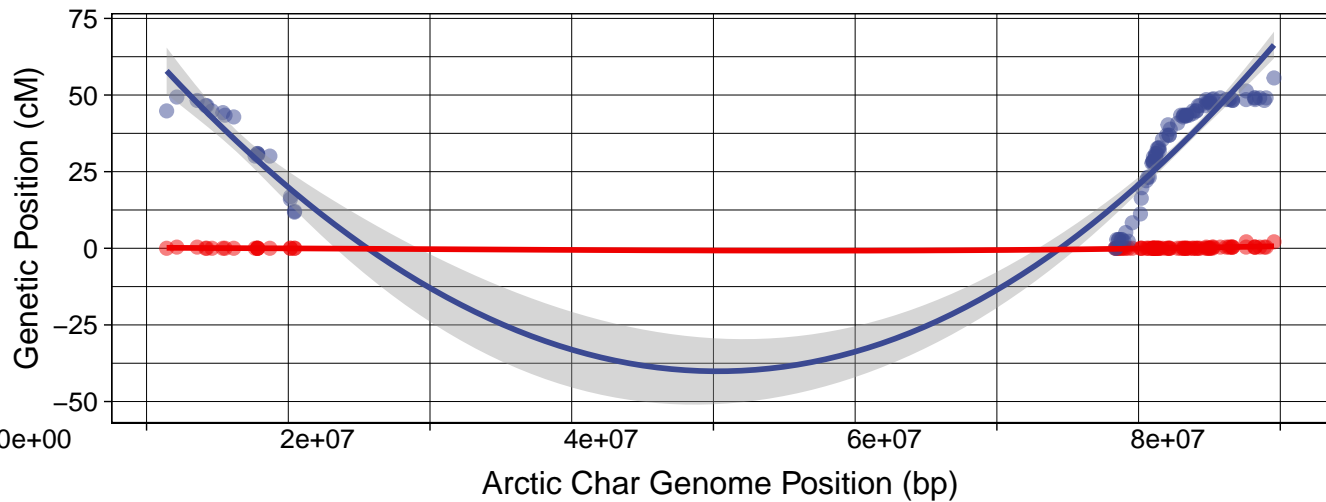

sna41 vs. NW\_019942591.1

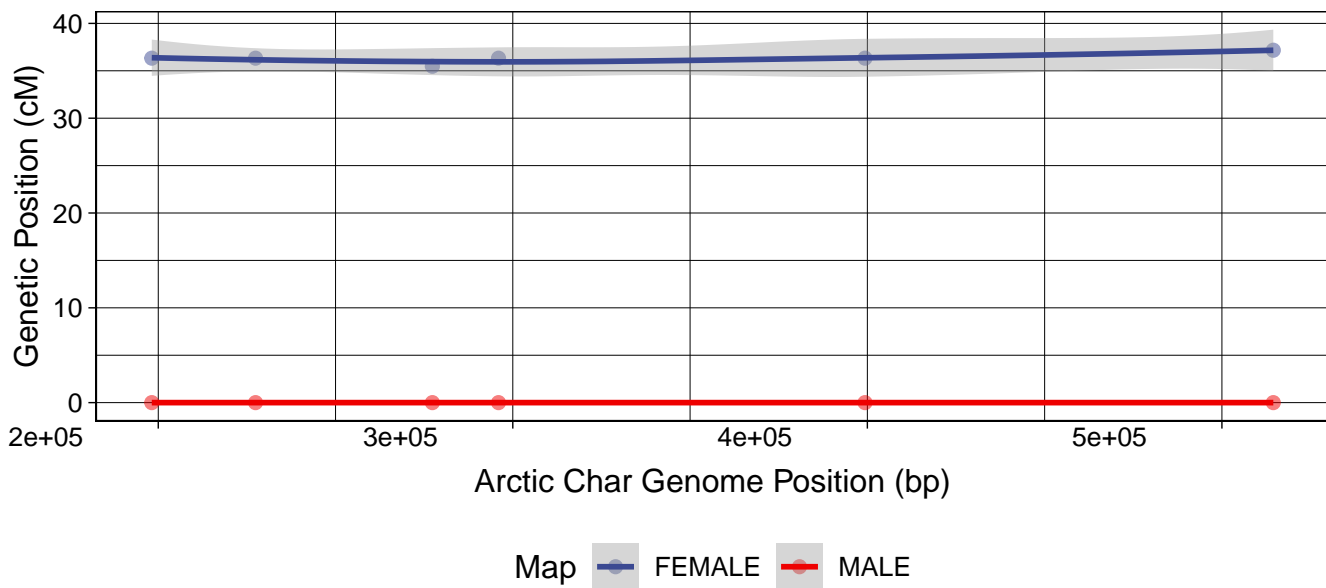

sna42 vs. NC\_036873.1

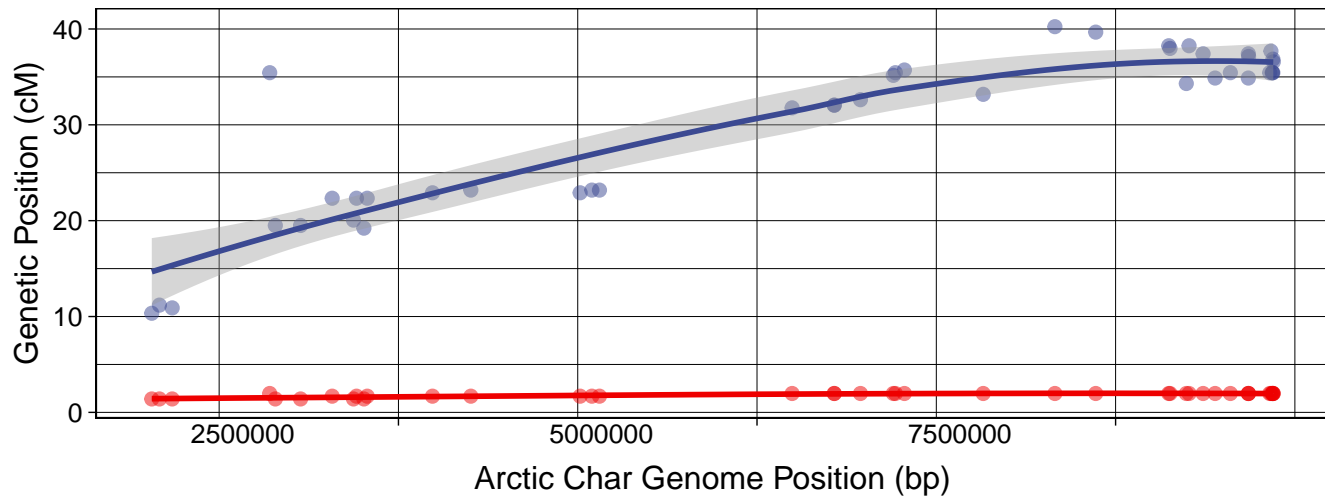

sna42 vs. NW\_019942596.1

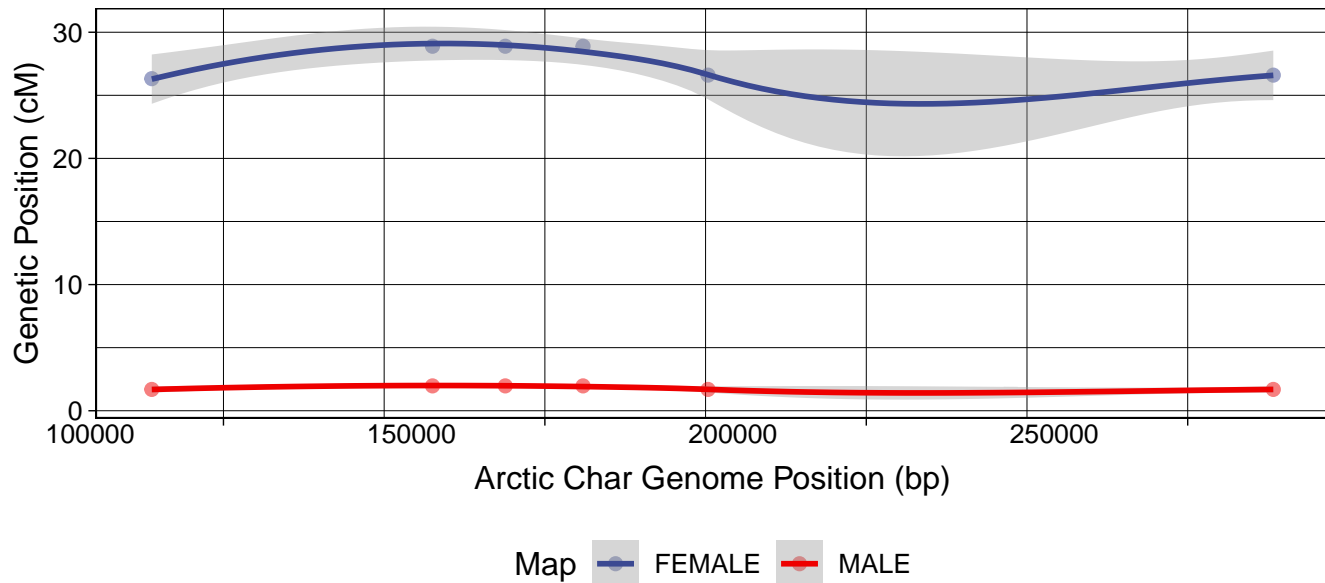

Supplement: Supplementary file 4 [file 1]
