# Supplementary material
Source: publisher figshare collection journal article supplement (https://gsajournals.figshare.com/articles/dataset/_/11908326)

**Figure S3:** Alignments of male and female lake trout linkage maps to the Atlantic Salmon chromosomes. The following figures display the linkage map position on the Y-axis and the chromosomal position on the X-axis for the two chromosomes with the most alignments for a given linkage group. Figure headings list the lake trout linkage group first (sna1-42) and the Atlantic Salmon chromosome to which they align second. The male linkage map is displayed in red and the female linkage map is displayed in blue.

sna1 vs. NC\_027323.1

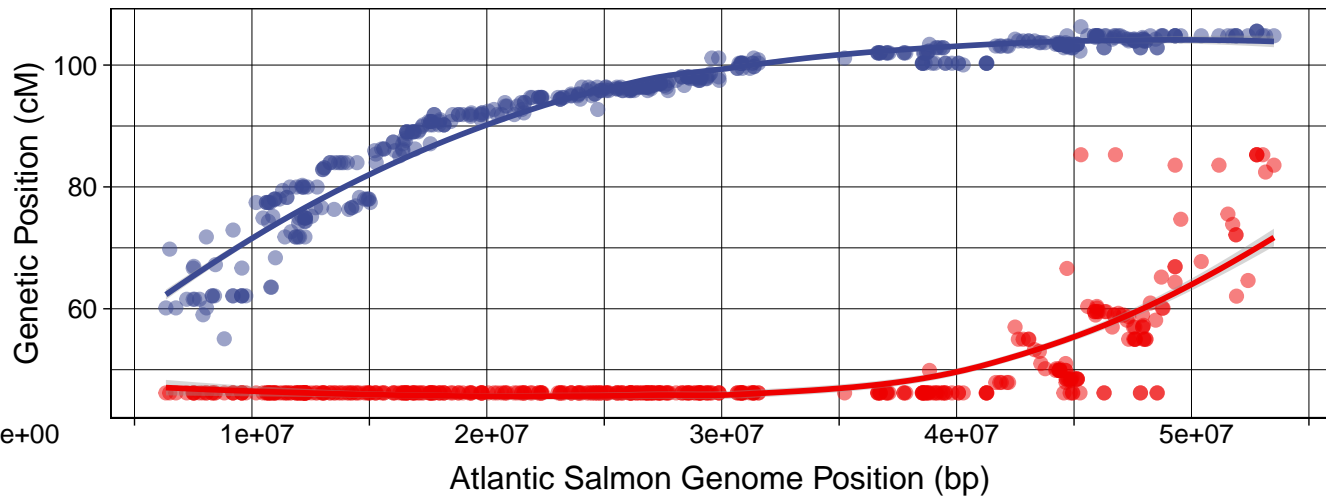

sna1 vs. NC\_027325.1

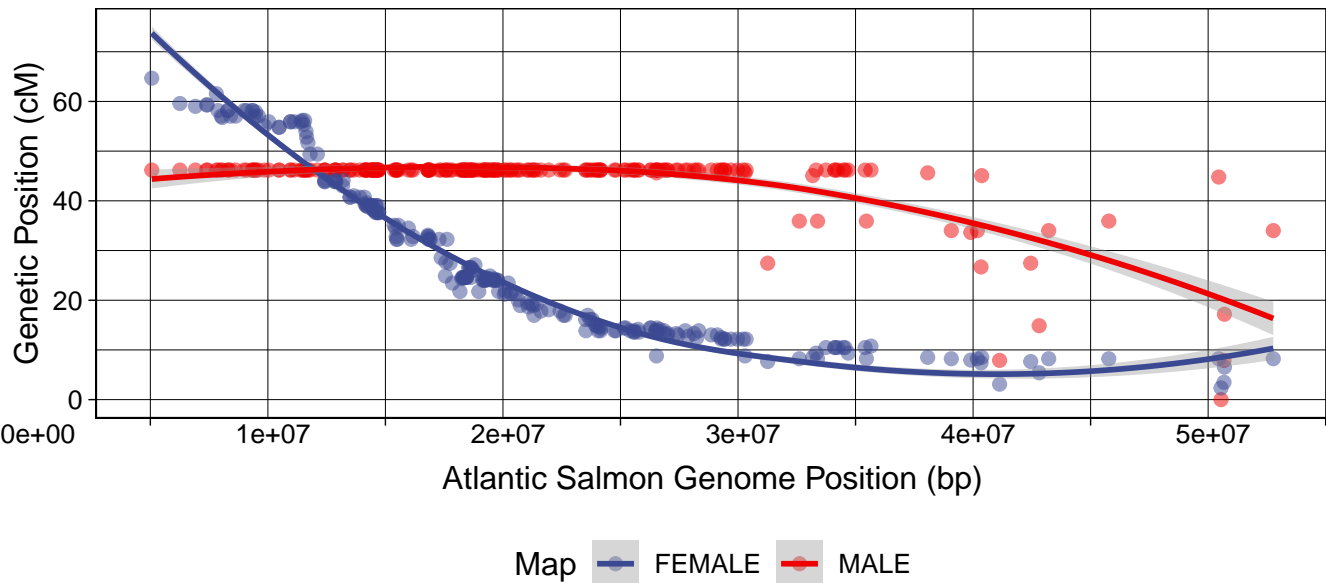

sna2 vs. NC\_027311.1

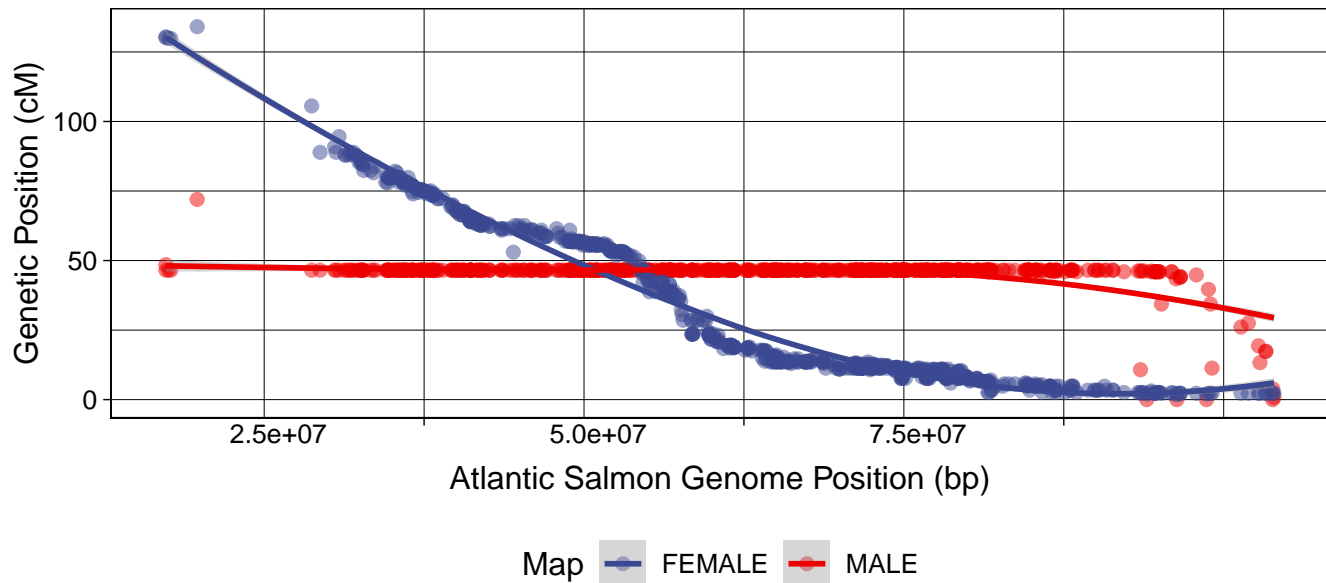

sna2 vs. NC\_027301.1

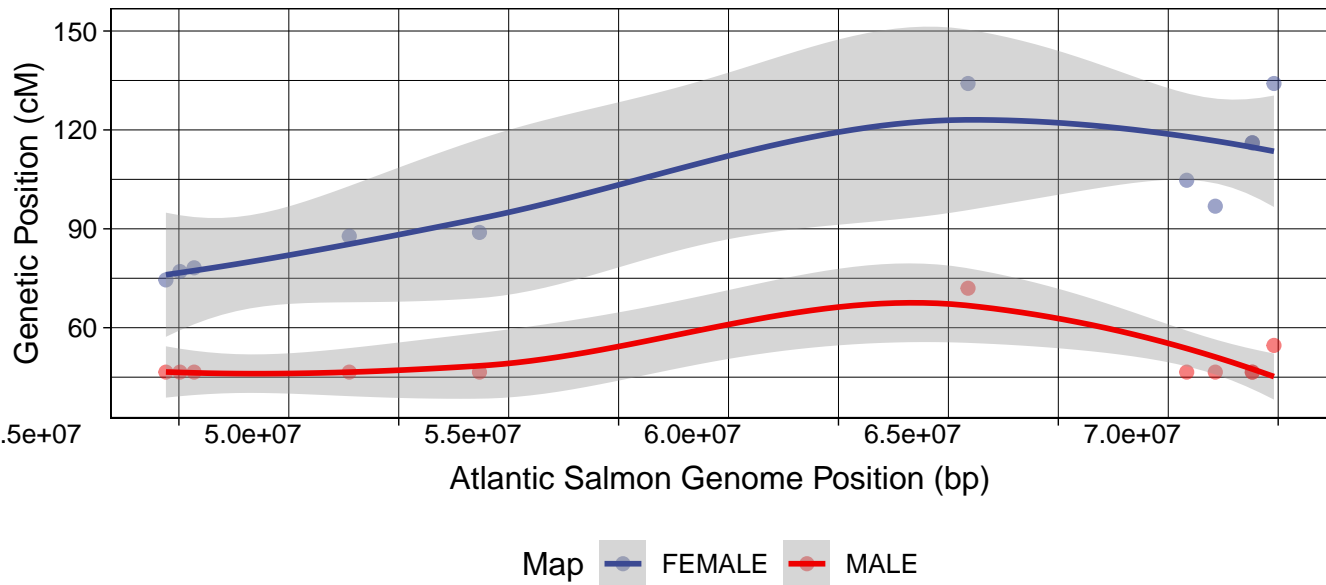

sna3 vs. NC\_027312.1

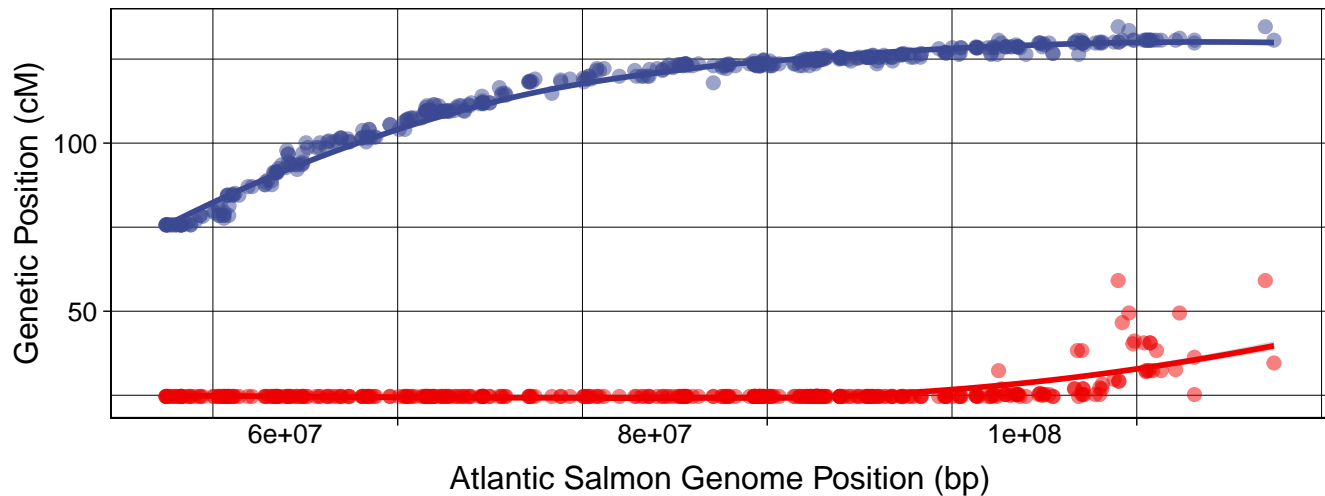

sna3 vs. NC\_027302.1

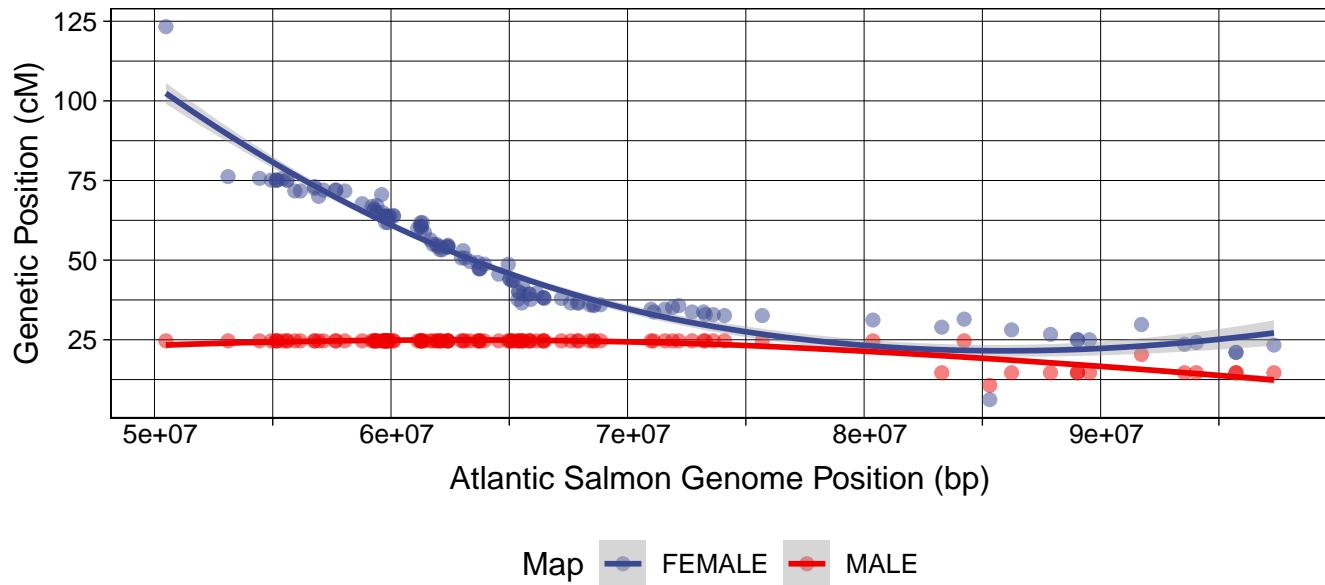

sna4 vs. NC\_027300.1

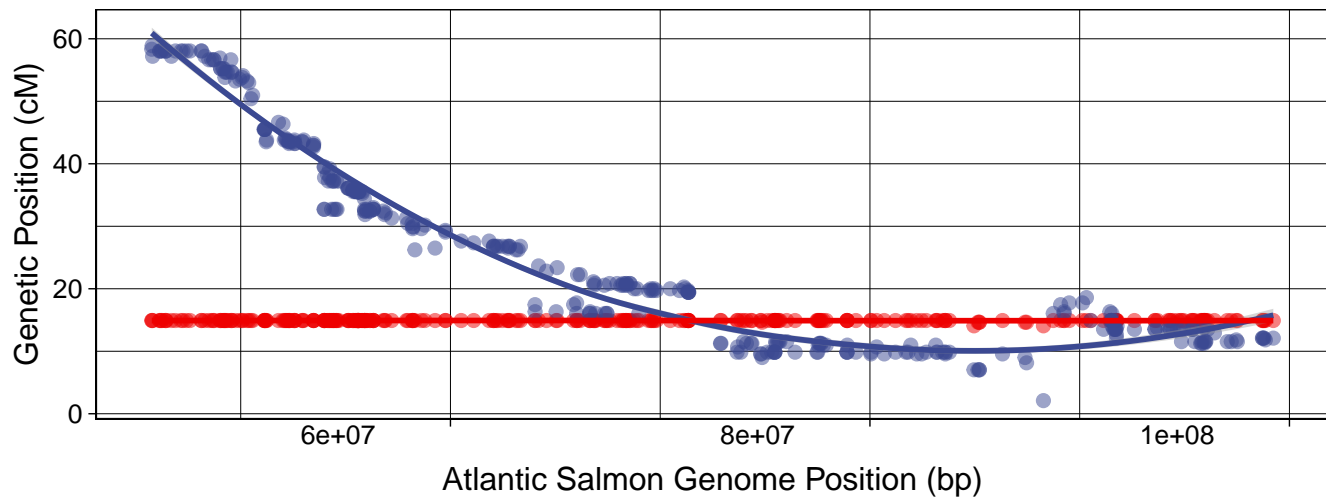

sna4 vs. NC\_027318.1

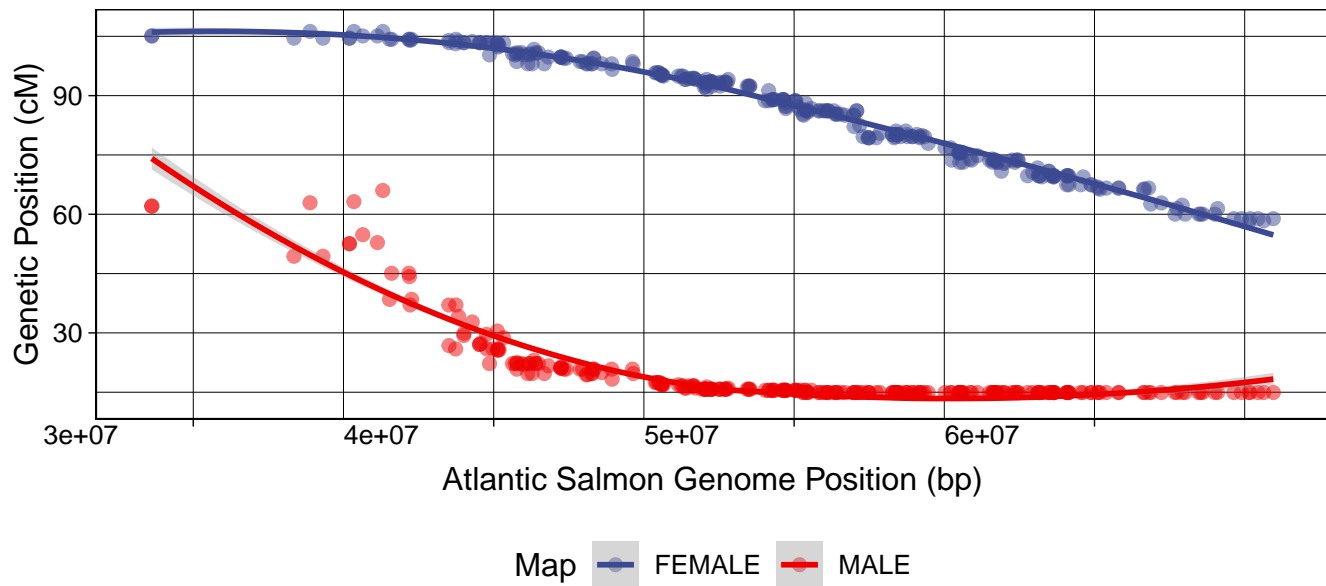

sna5 vs. NC\_027304.1

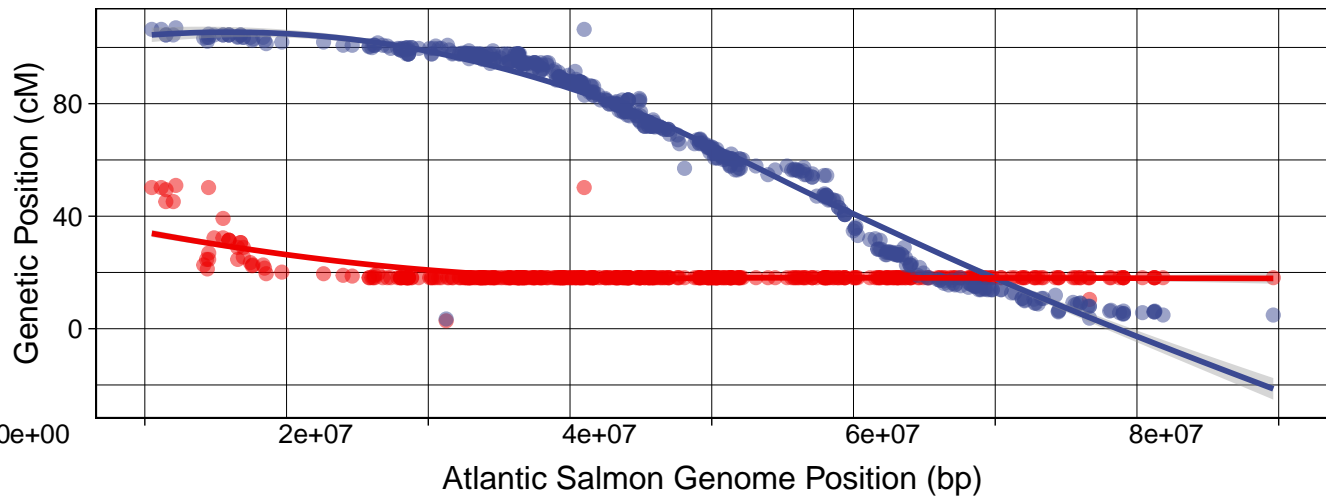

sna5 vs. NC\_027301.1

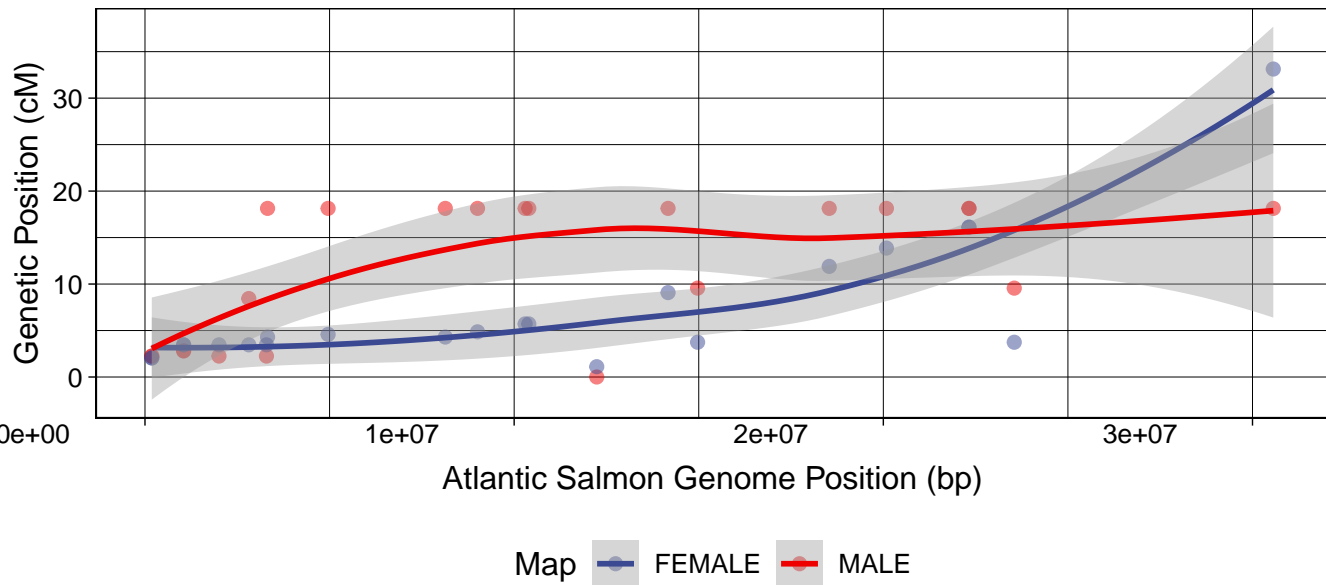

sna6 vs. NC\_027306.1

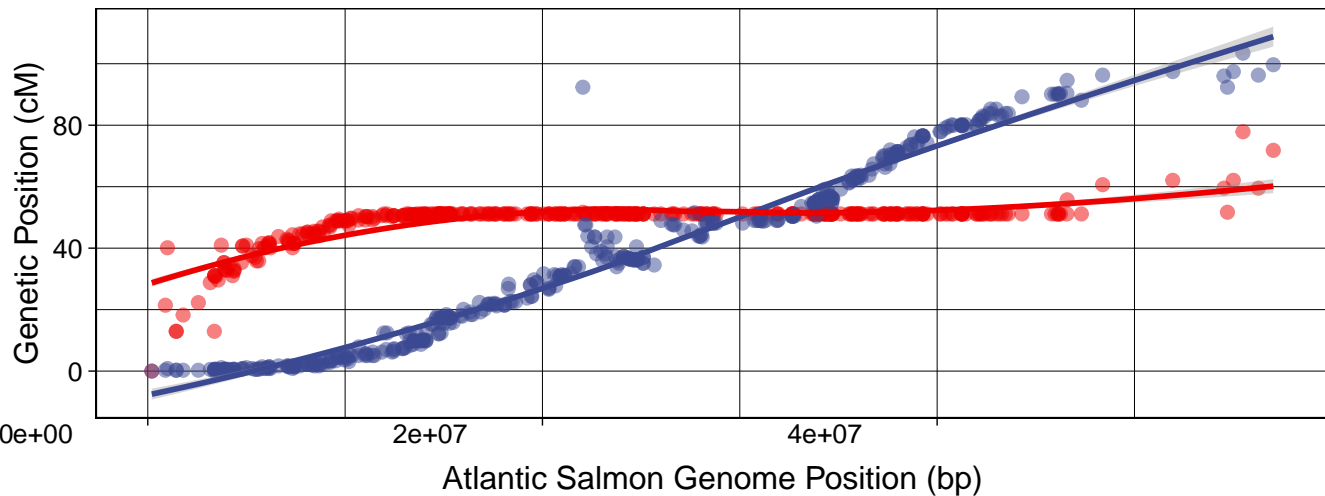

sna6 vs. NC\_027316.1

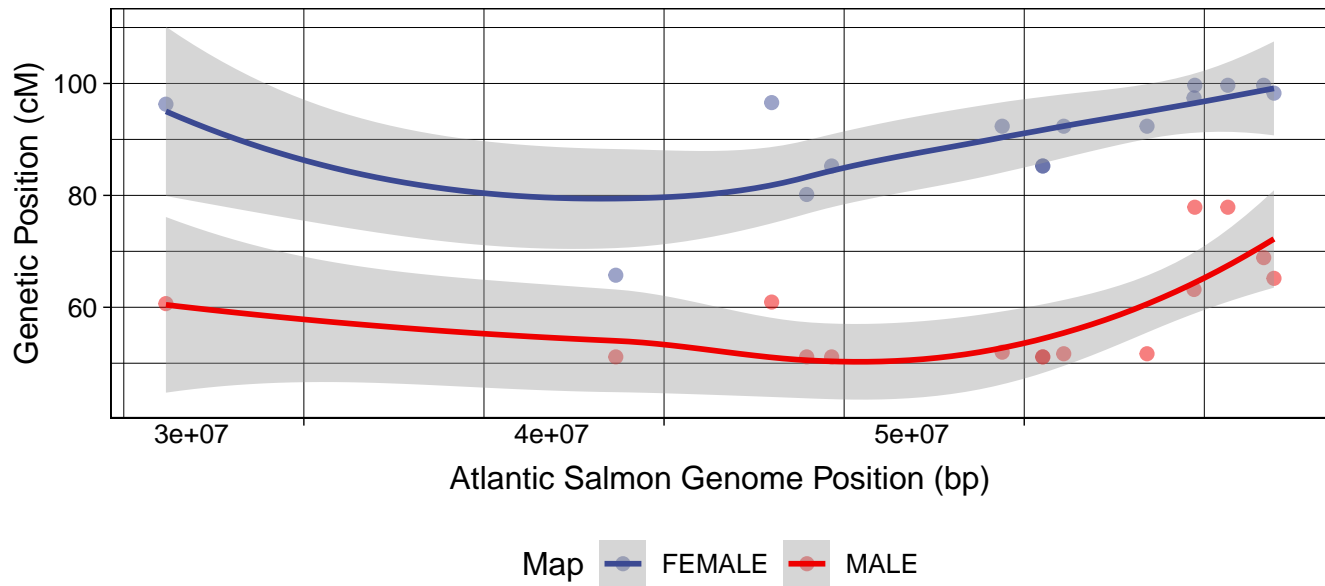

sna7 vs. NC\_027328.1

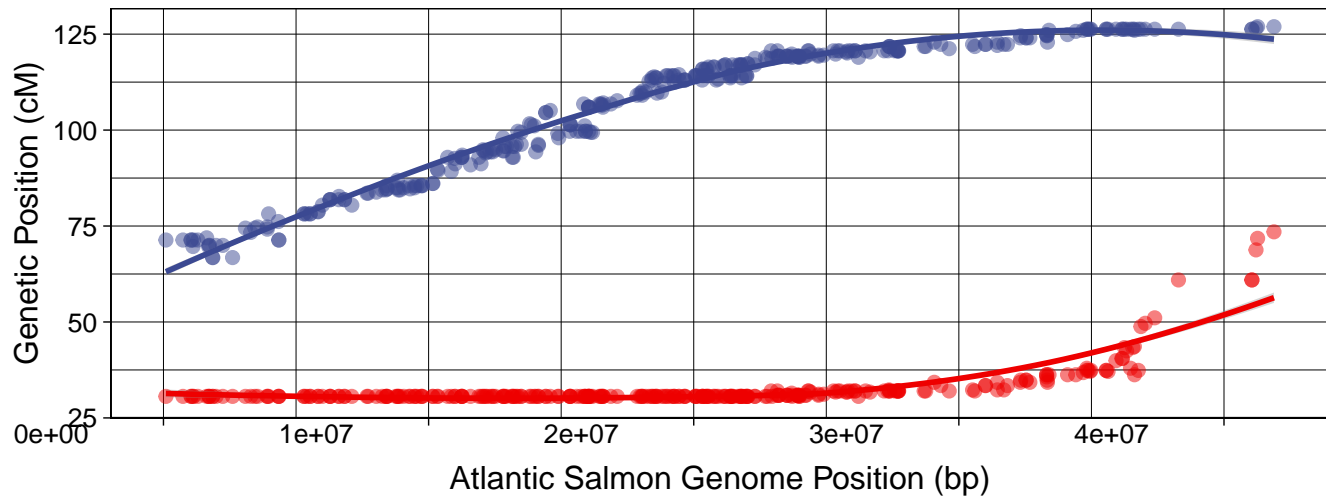

sna7 vs. NC\_027315.1

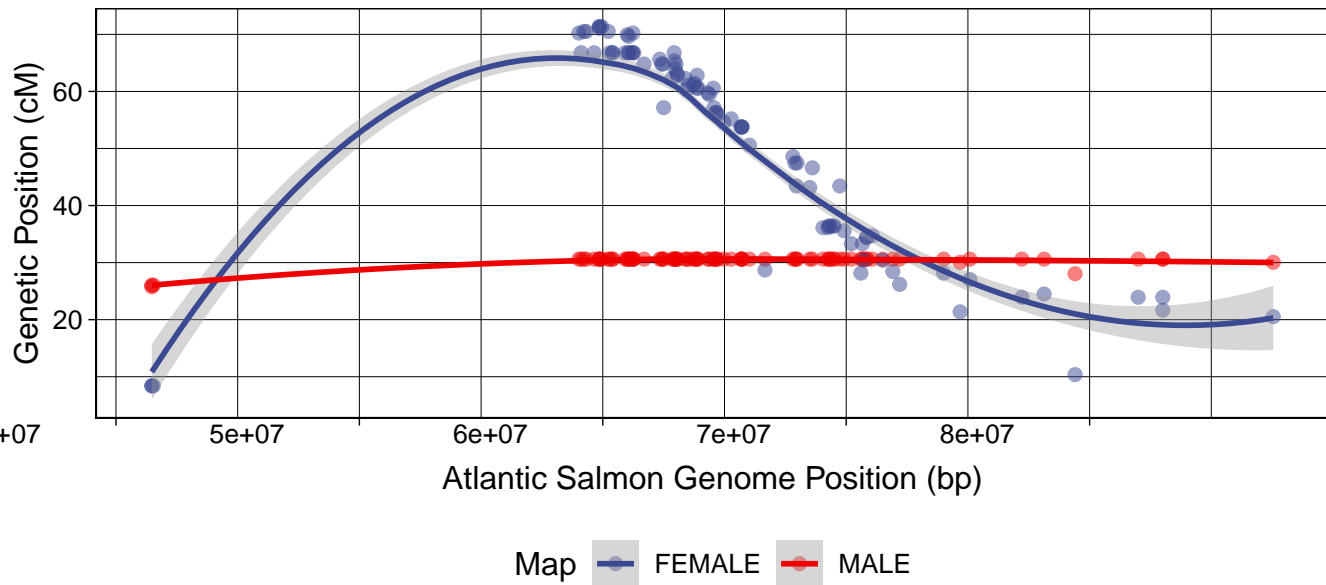



sna8 vs. NC\_027322.1

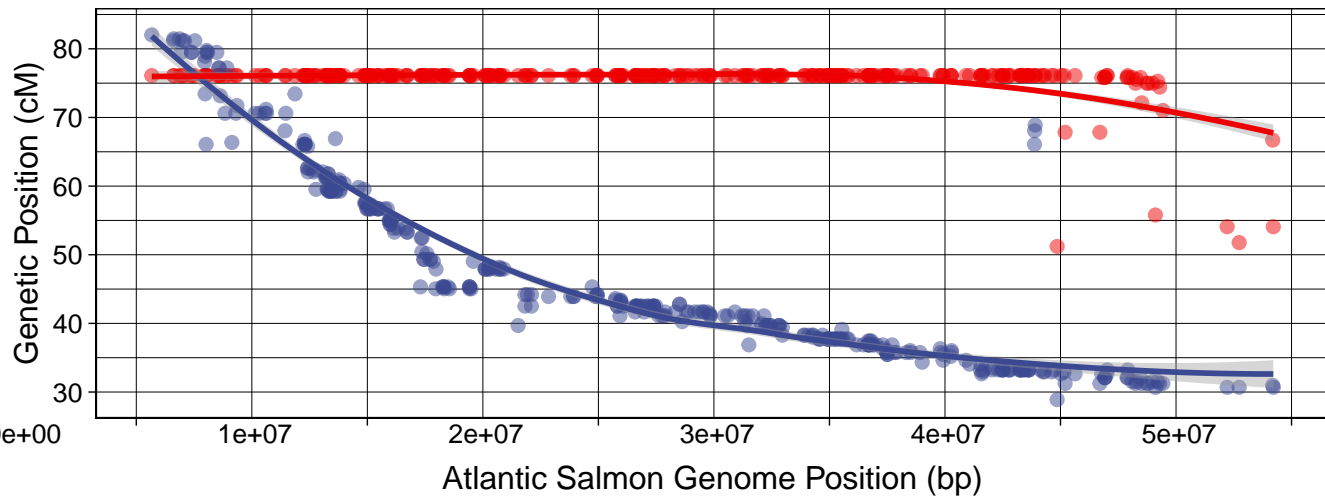

sna8 vs. NC\_027303.1

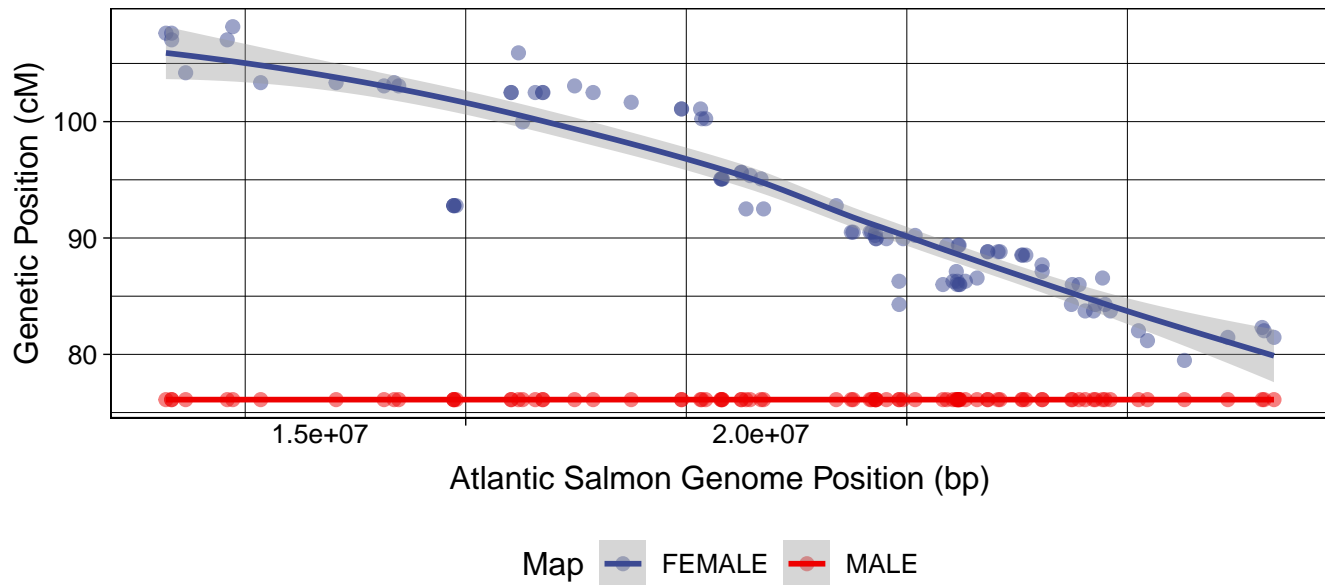

sna9 vs. NC\_027315.1

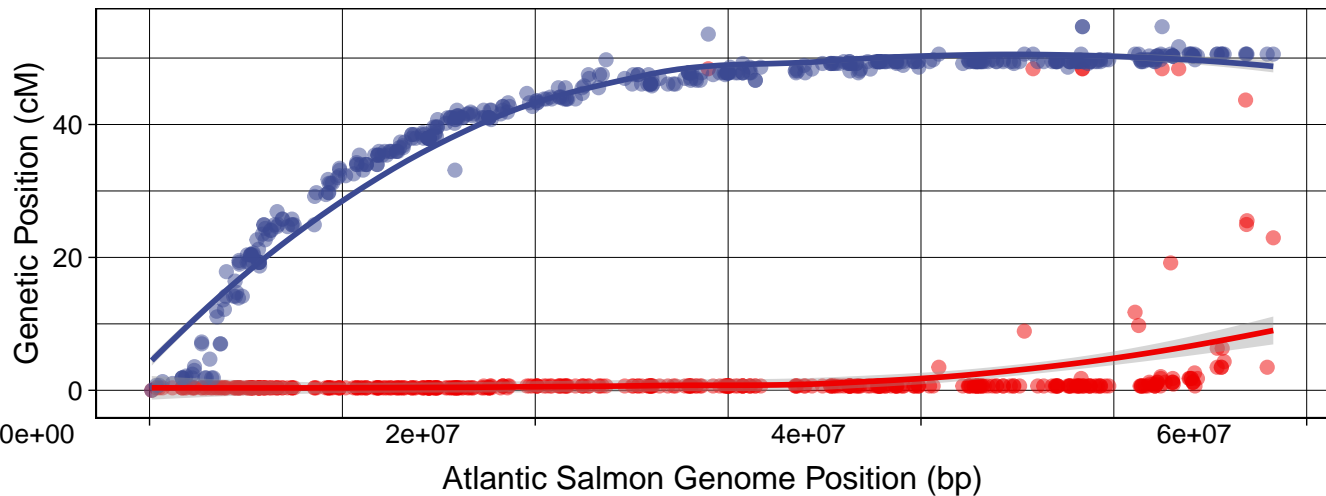

sna9 vs. NW\_012359021.1

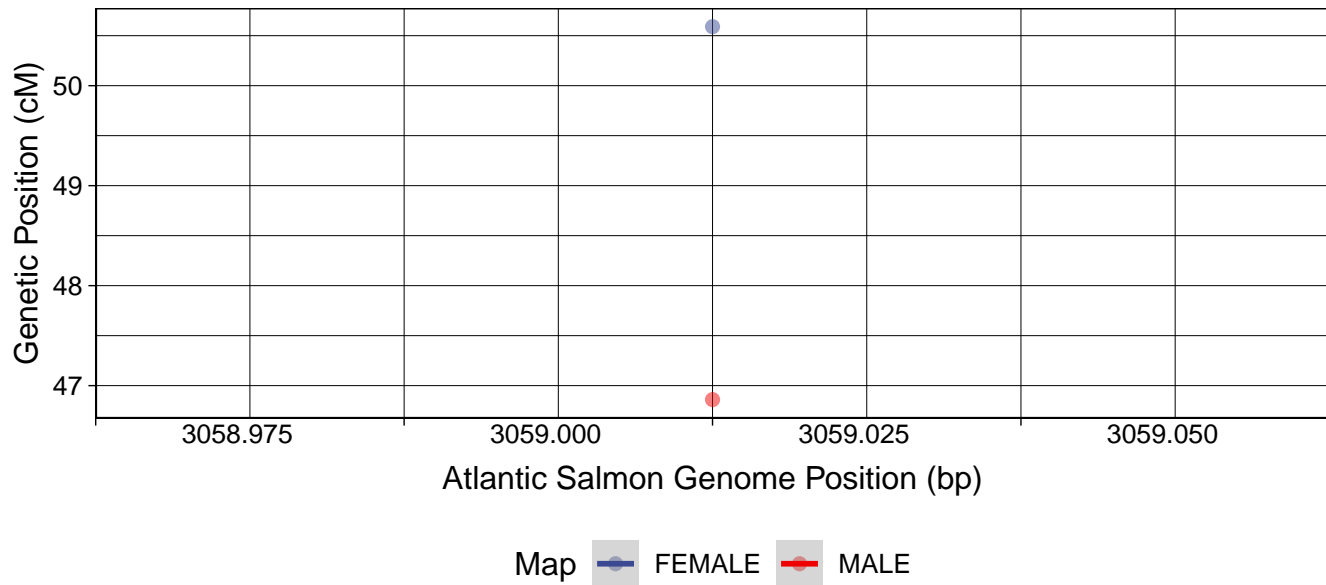

sna10 vs. NC\_027309.1

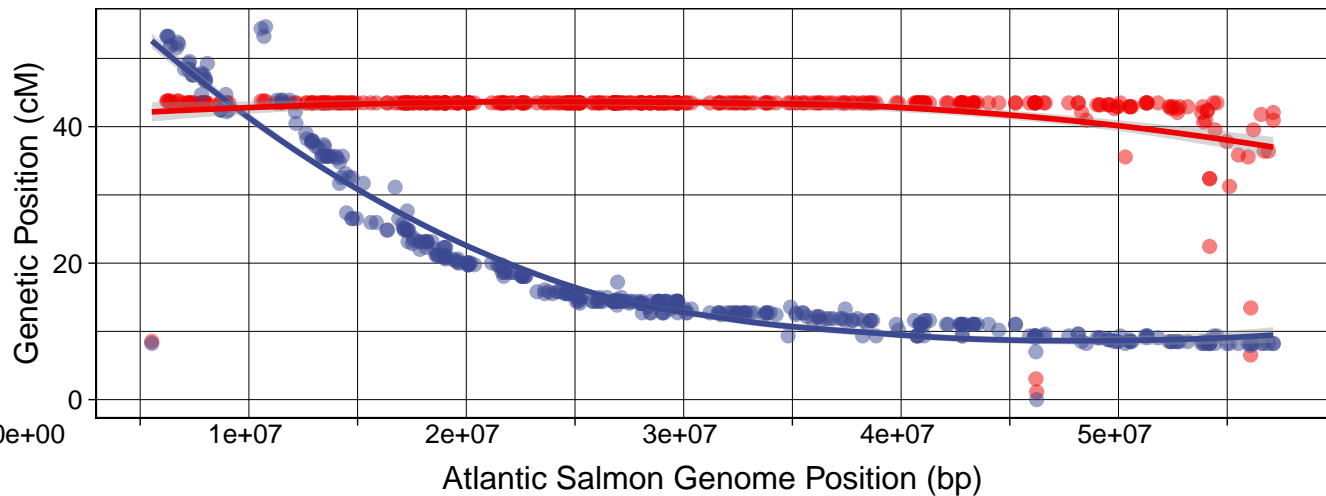

sna10 vs. NW\_012347496.1

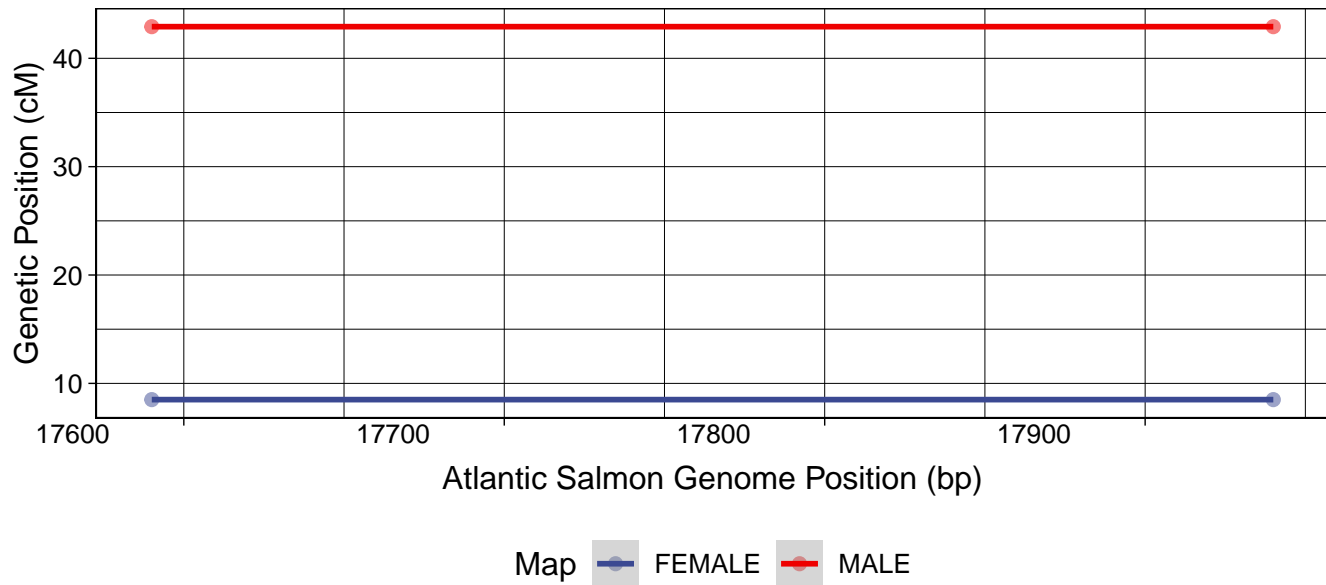

sna11 vs. NC\_027313.1

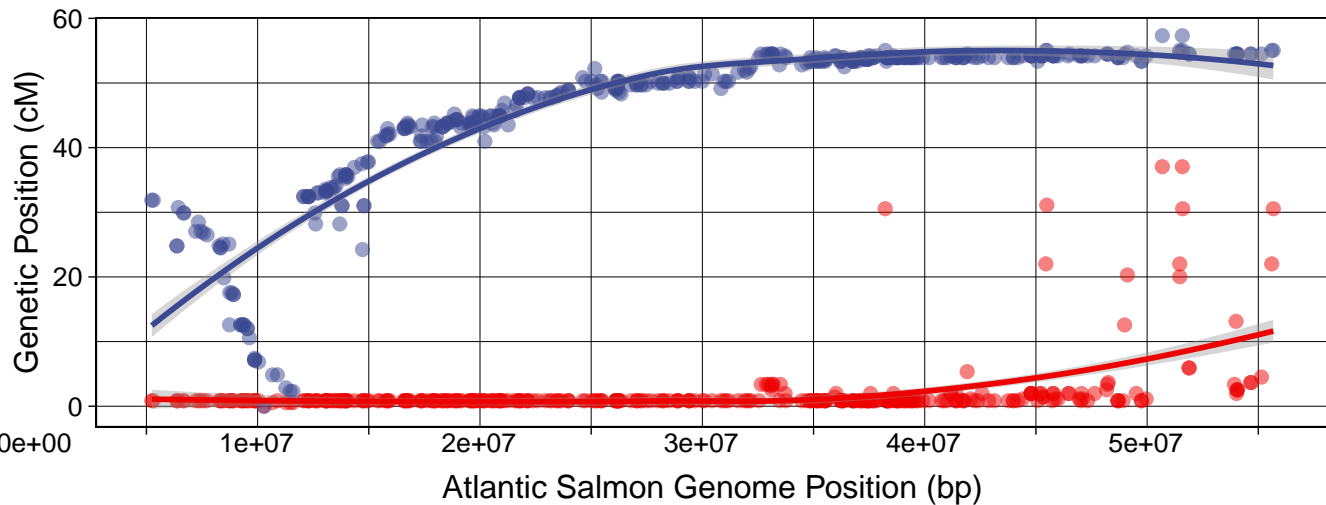

sna11 vs. NW\_012360321.1

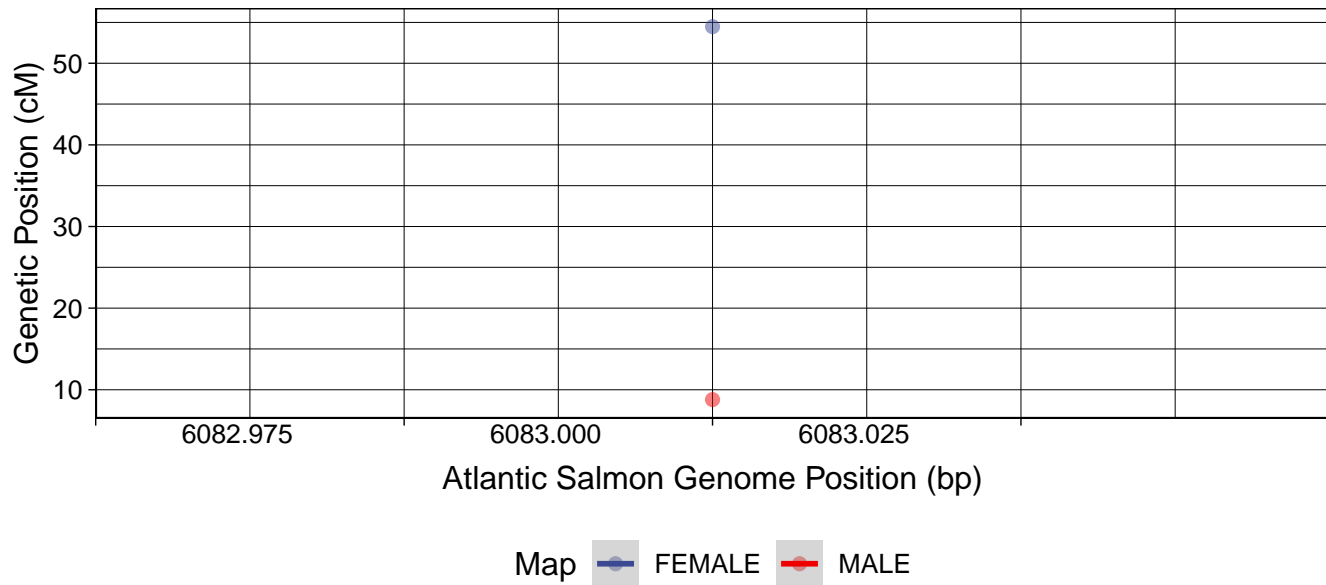

sna12 vs. NC\_027303.1

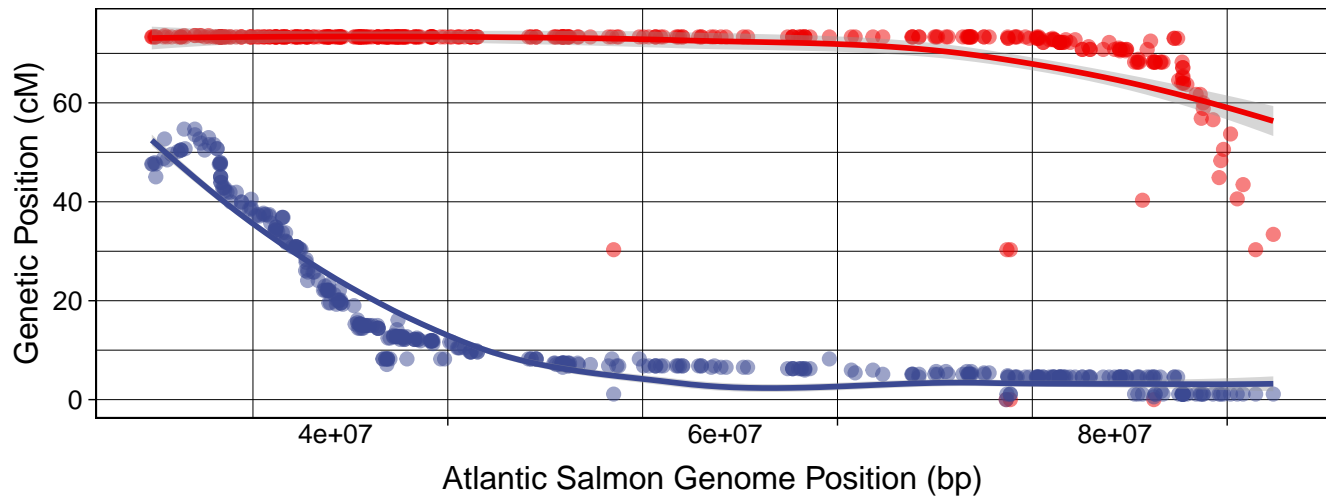

sna12 vs. NW\_012411851.1

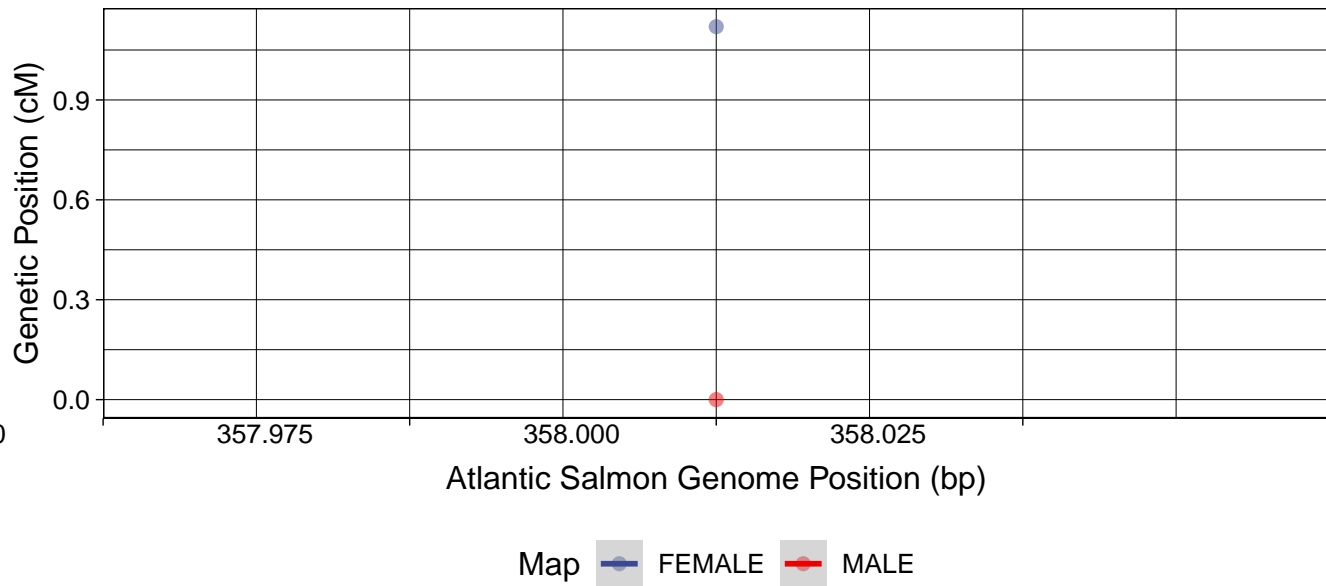

sna13 vs. NC\_027324.1

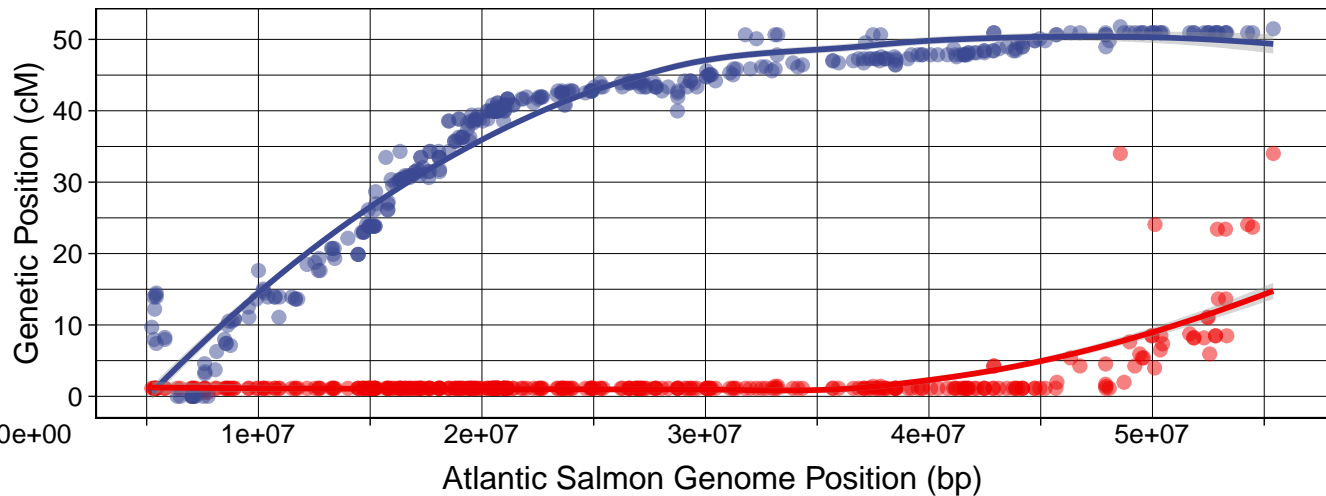

sna13 vs. NC\_027317.1

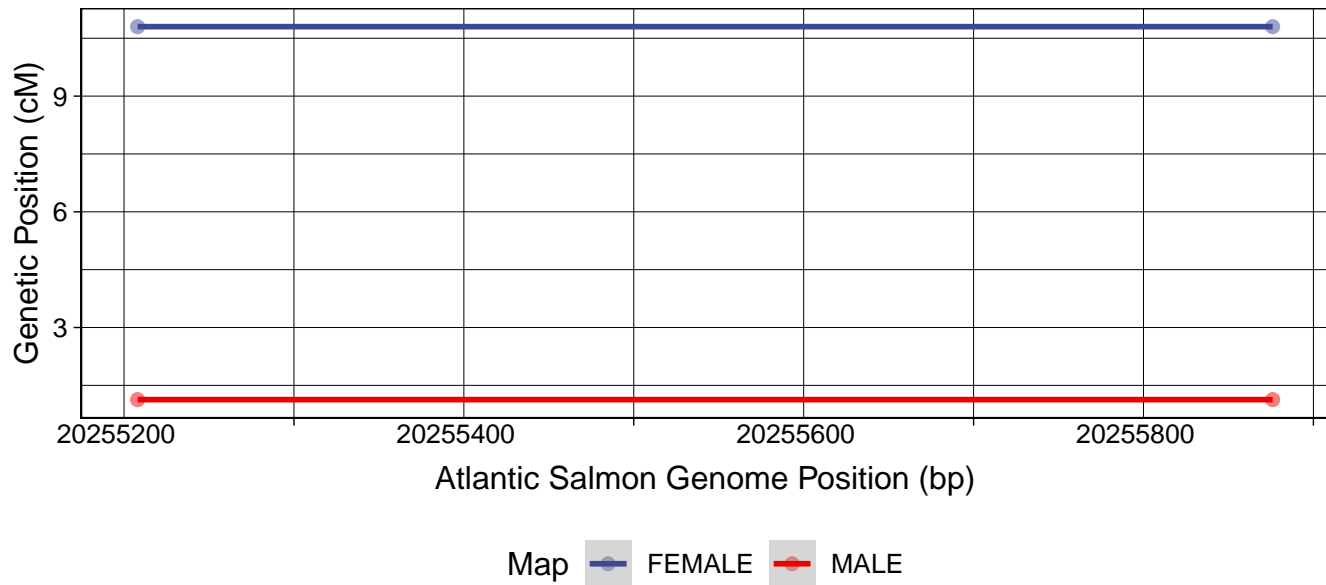

sna14 vs. NC\_027314.1

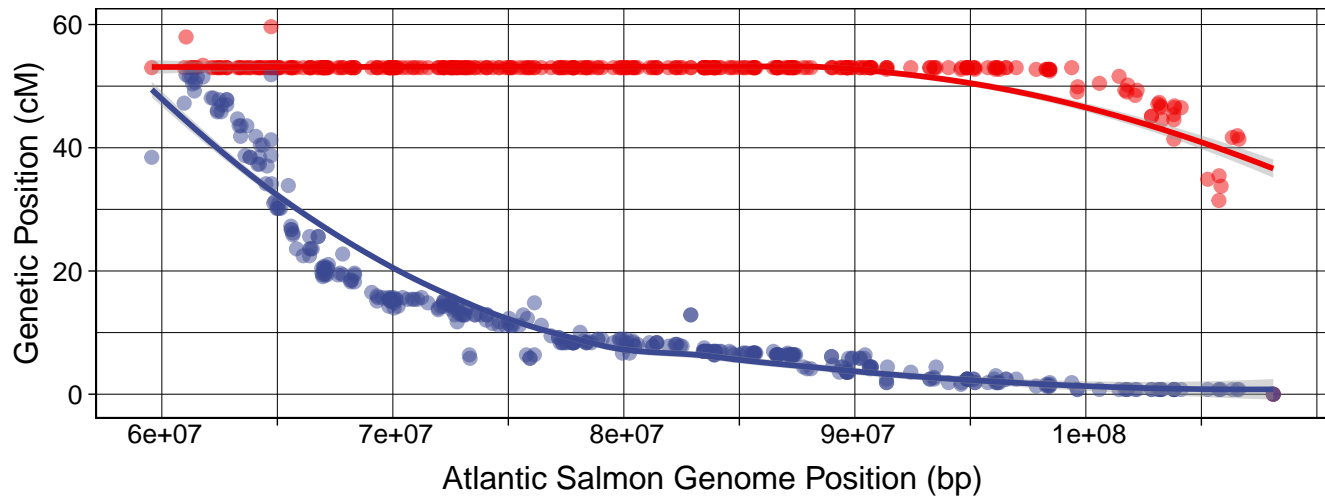

sna14 vs. NW\_012350079.1

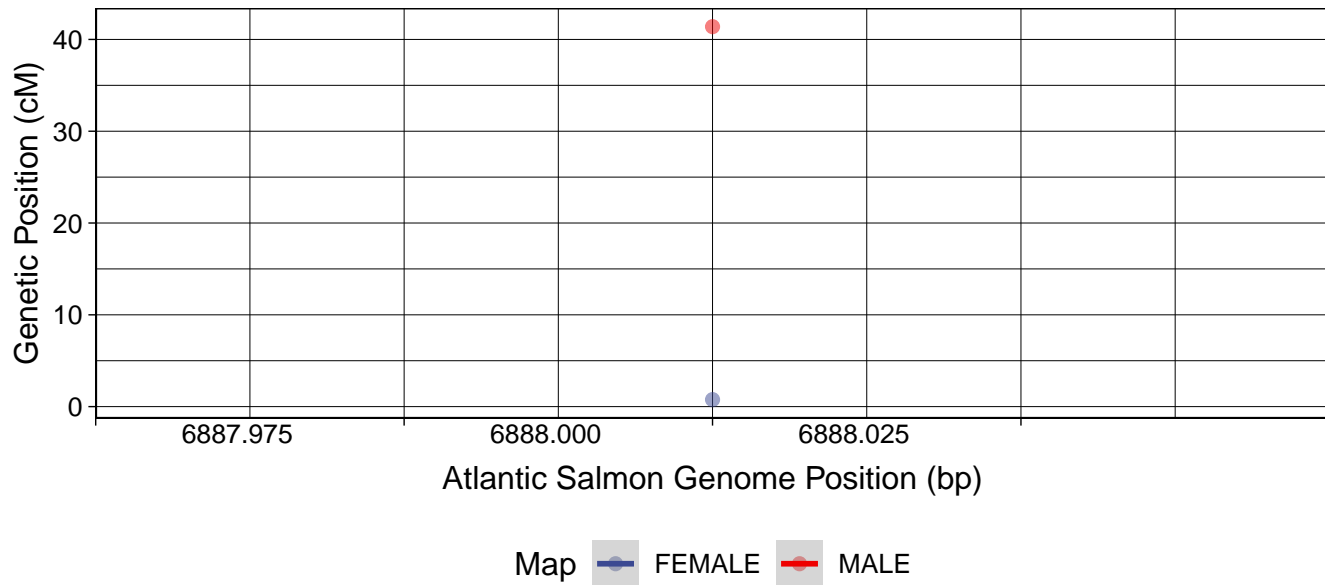

sna15 vs. NC\_027300.1

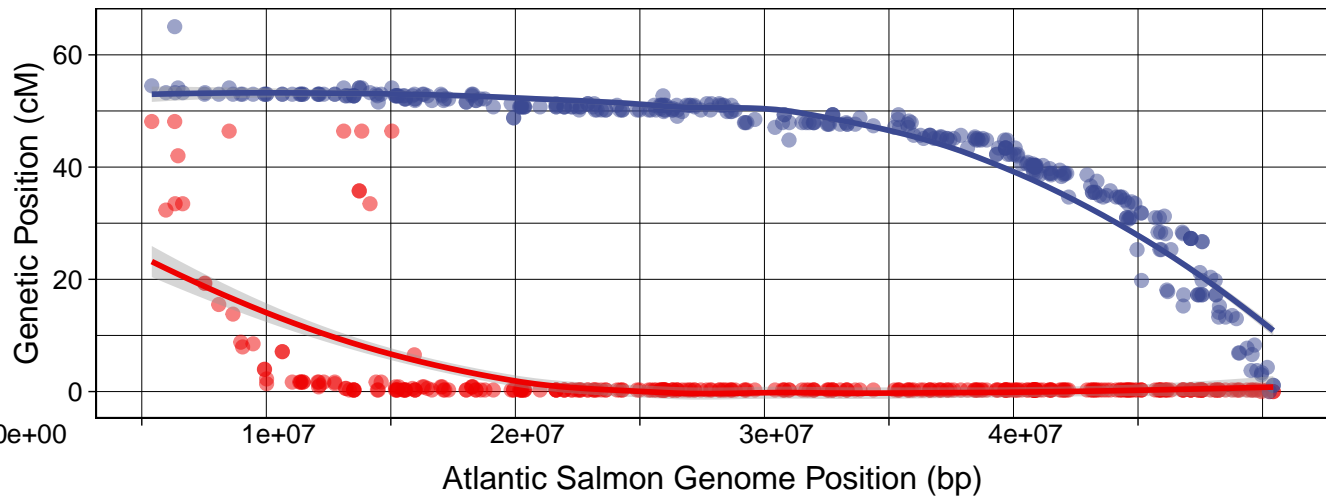

sna15 vs. NW\_012348938.1

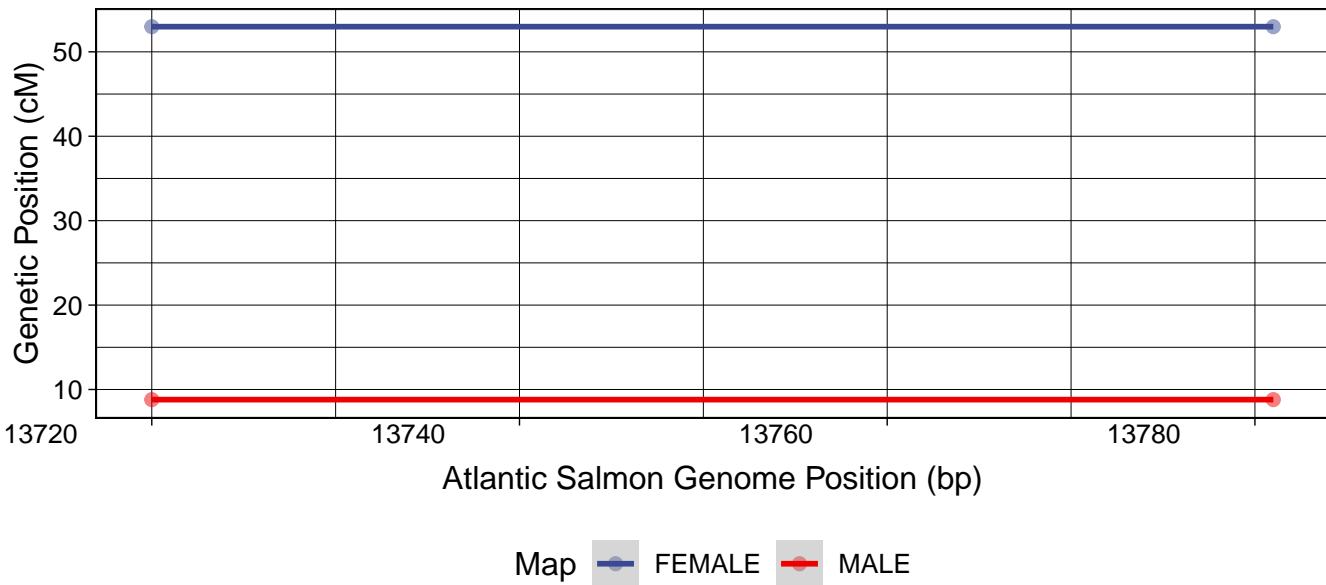



sna16 vs. NC\_027312.1

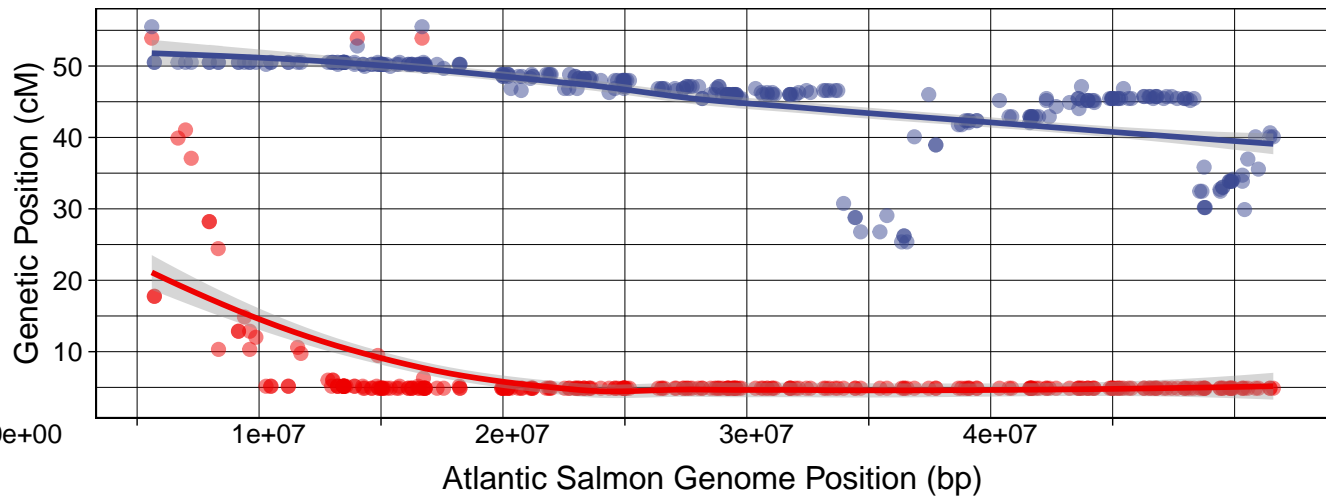

sna16 vs. NC\_027318.1

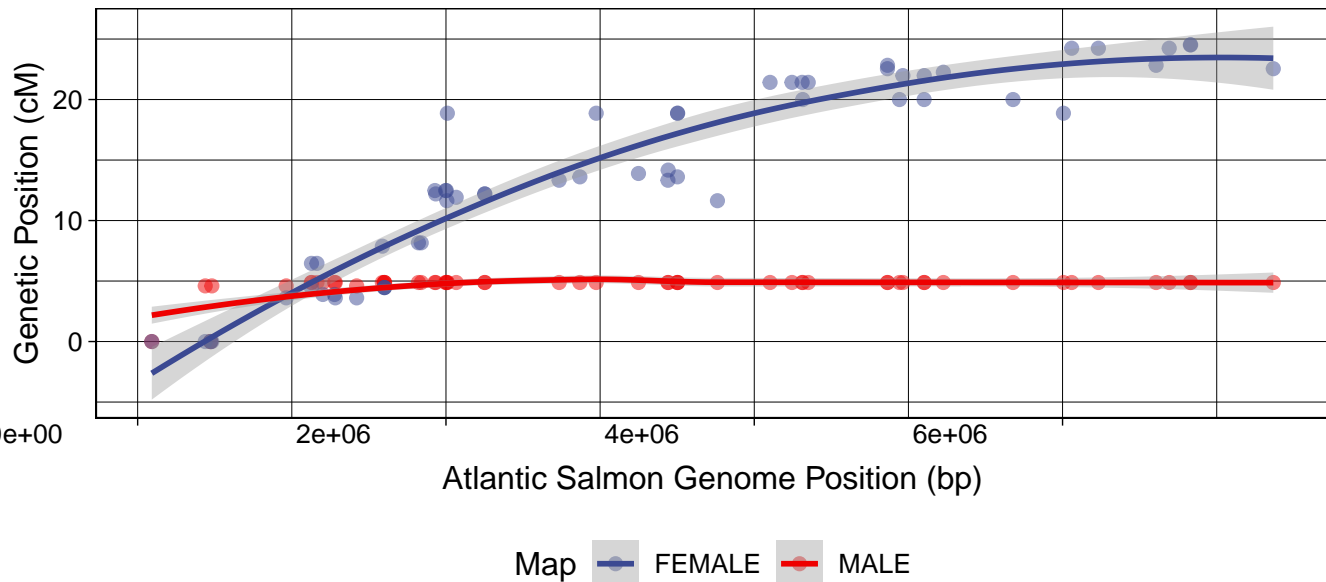

sna17 vs. NC\_027308.1

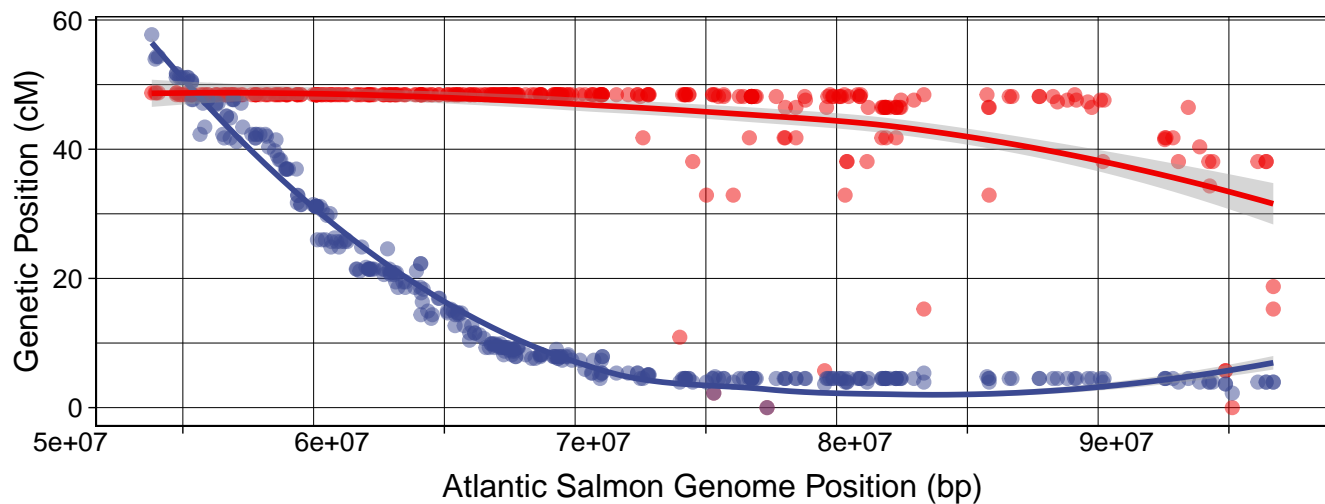

sna17 vs. NC\_027304.1

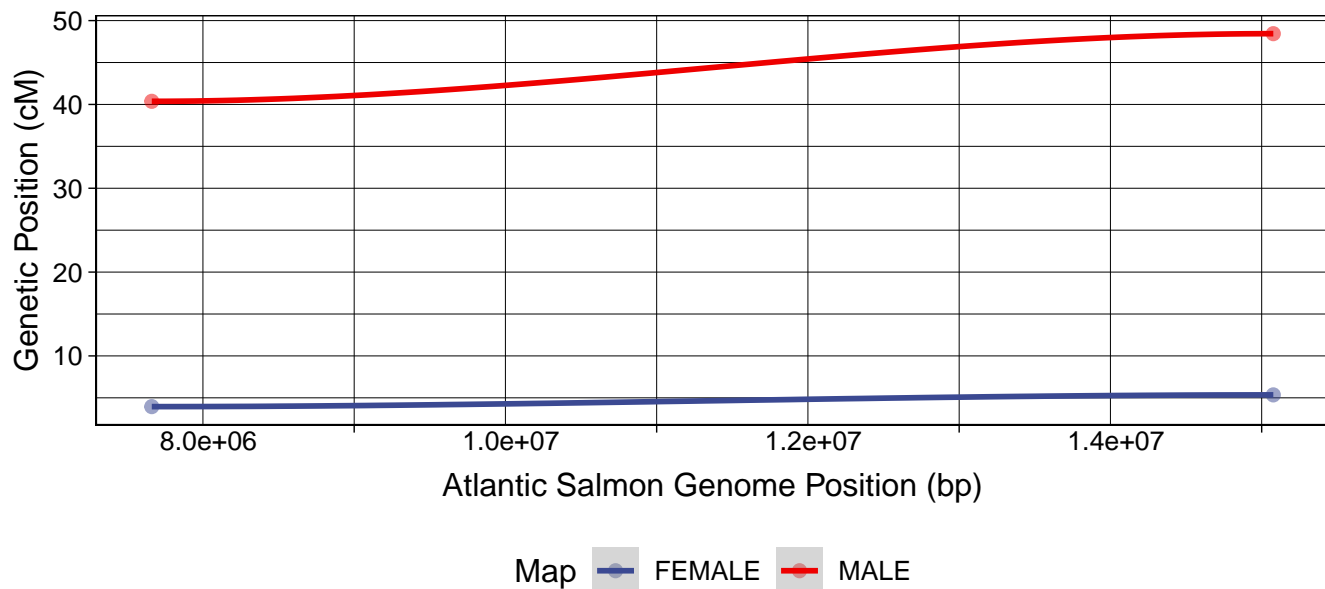

sna18 vs. NC\_027319.1

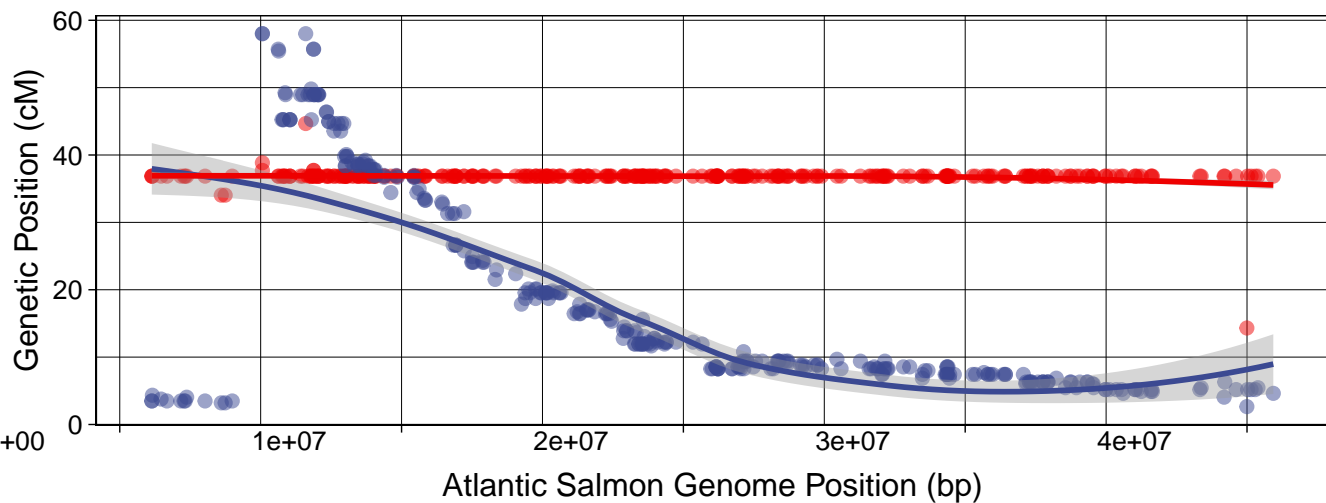

sna18 vs. NC\_027314.1

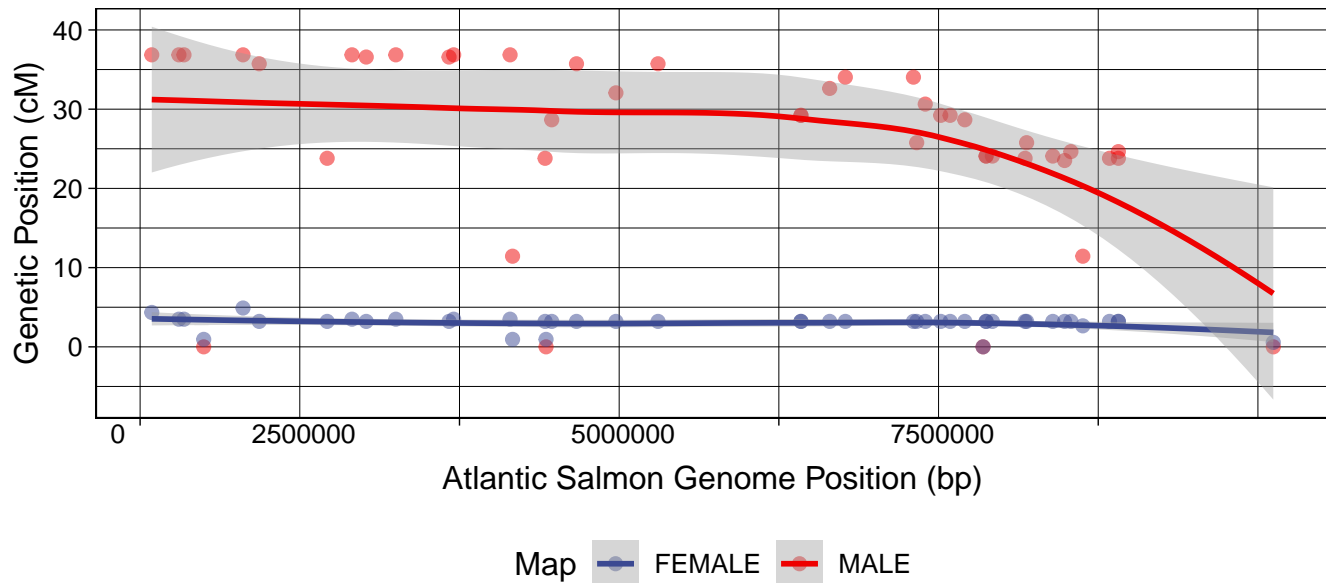

sna19 vs. NC\_027320.1

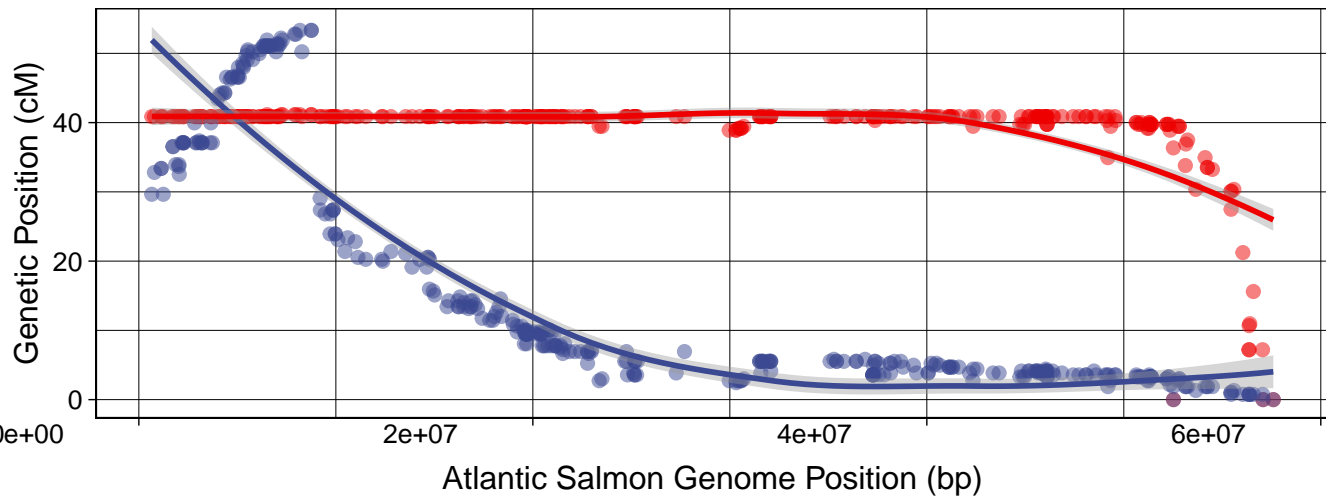

sna19 vs. NW\_012347564.1

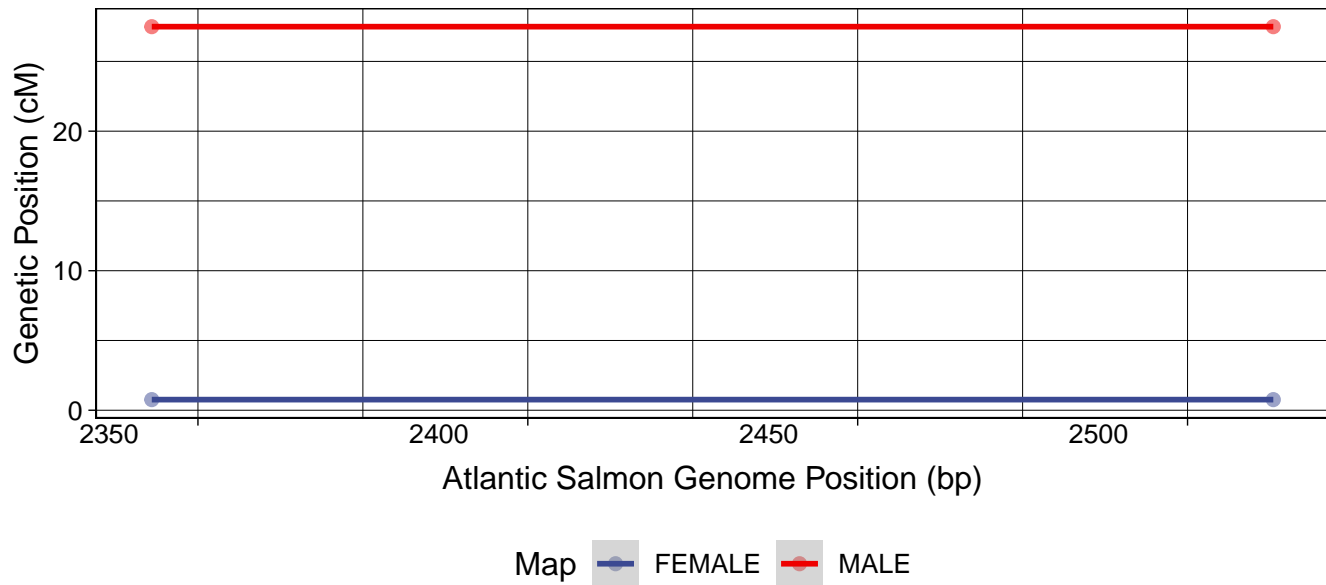

sna20 vs. NC\_027321.1

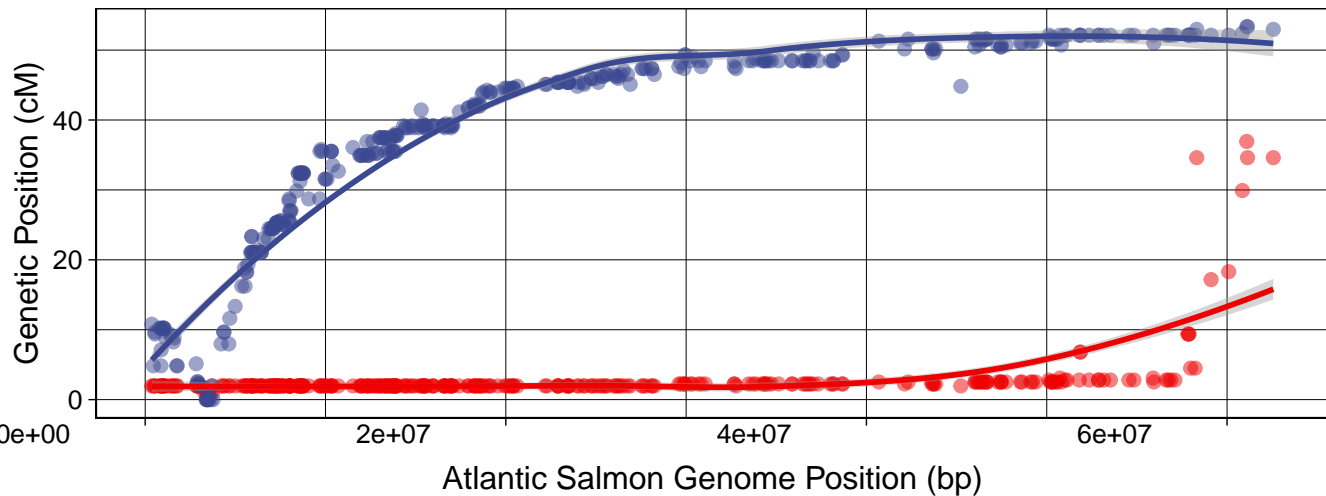

sna20 vs. NC\_027319.1

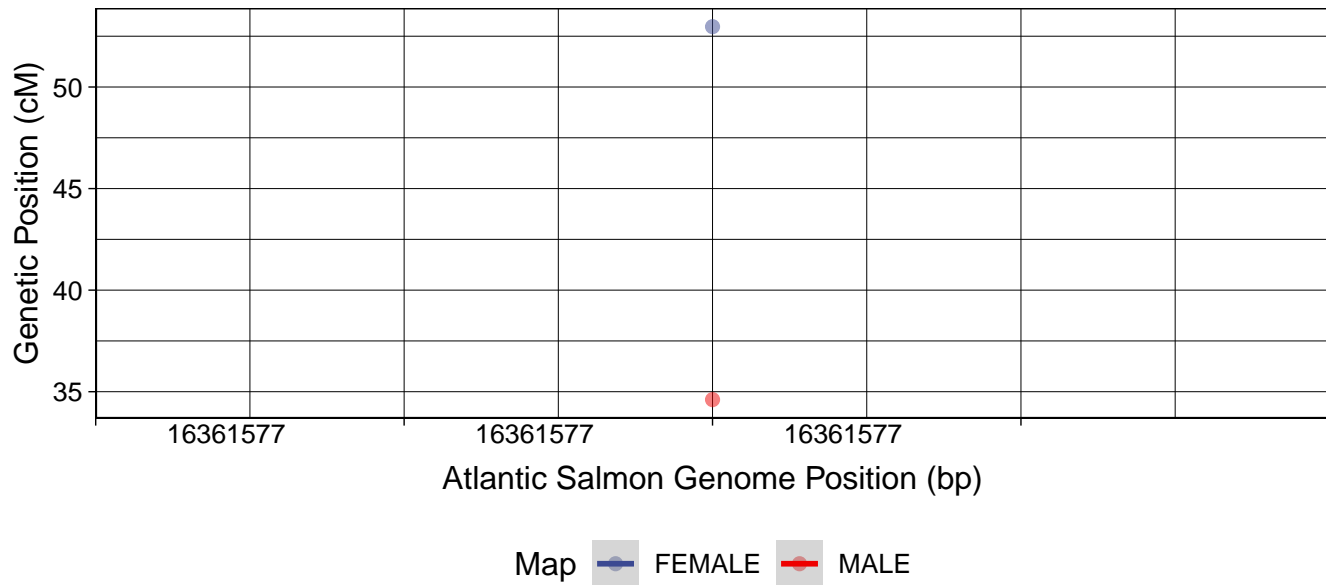

sna21 vs. NC\_027309.1

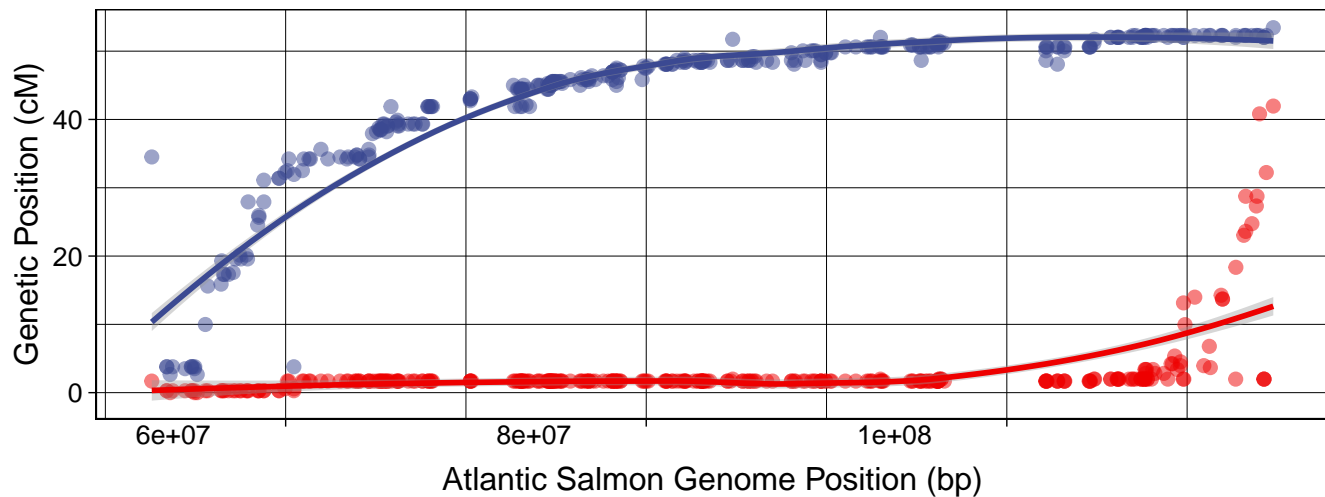

sna21 vs. NC\_027304.1

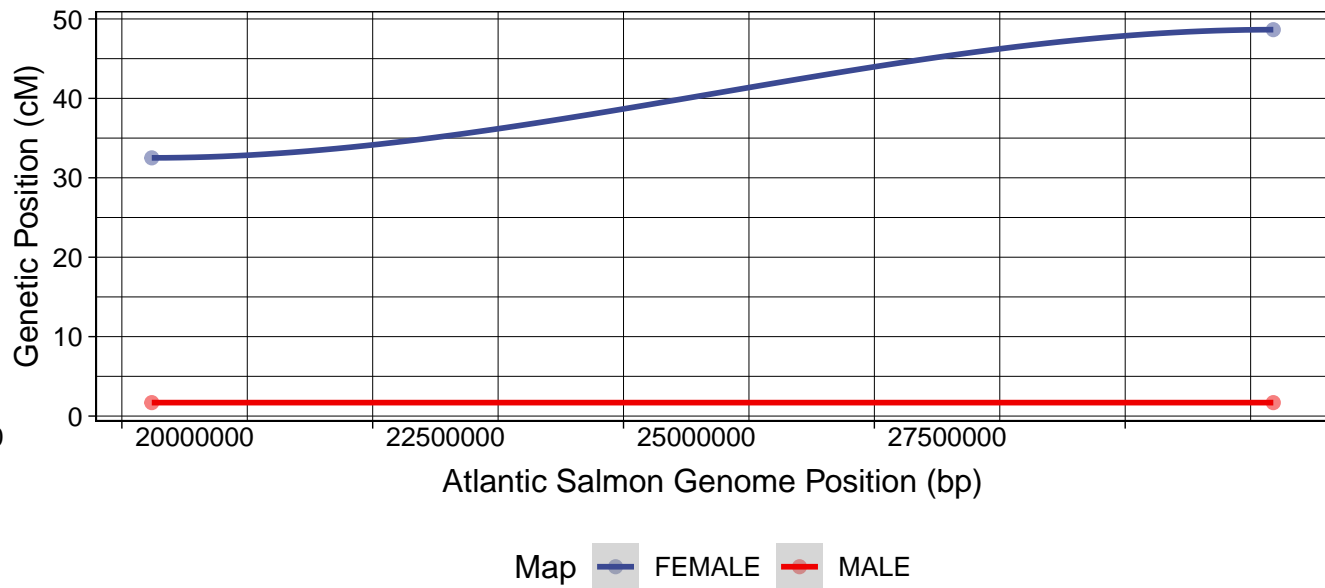

sna22 vs. NC\_027317.1

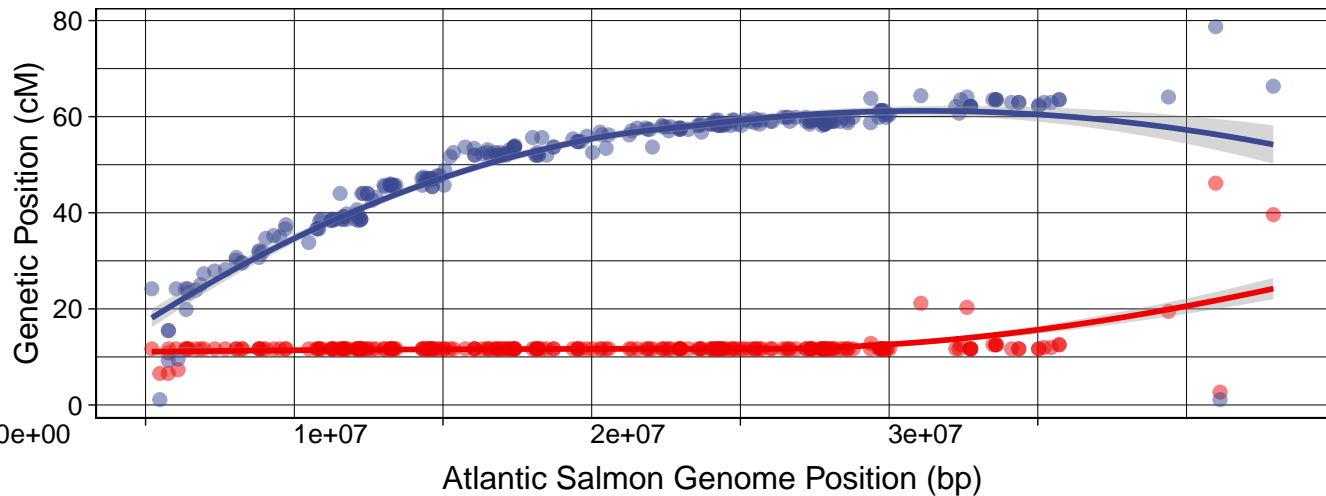

sna22 vs. NC\_027300.1

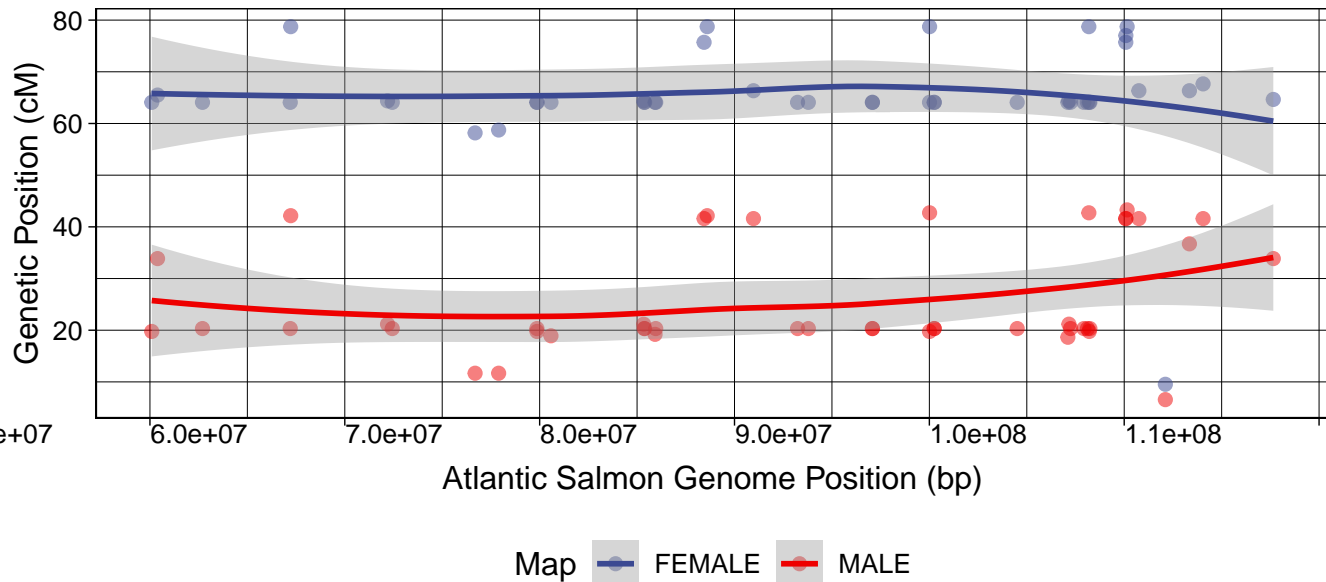

sna23 vs. NC\_027319.1

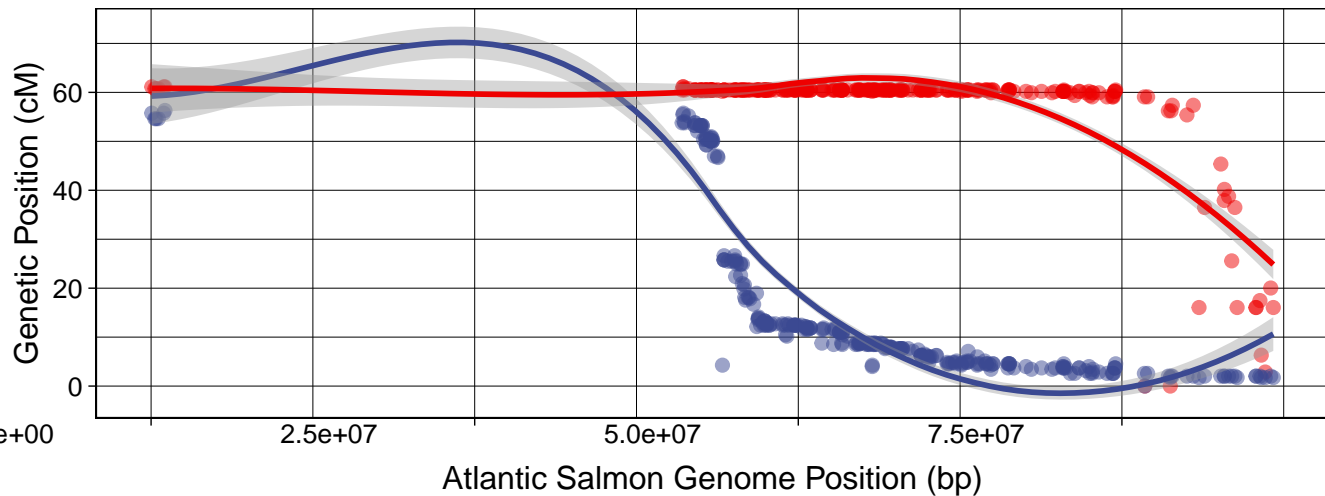

sna23 vs. NC\_027308.1

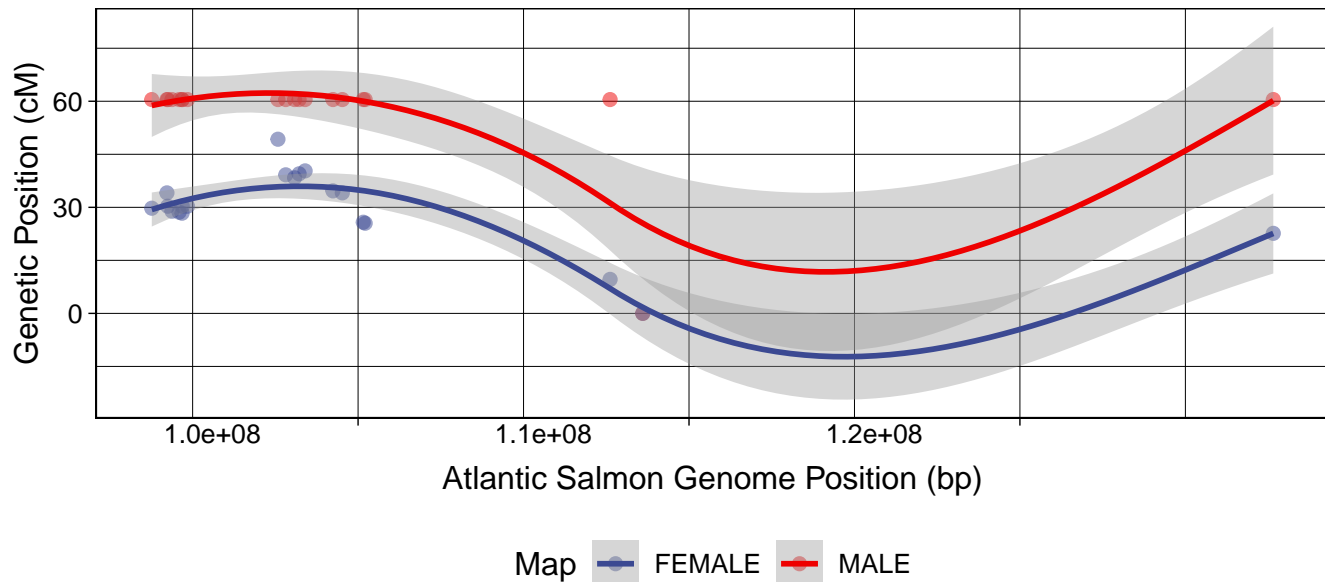



sna24 vs. NC\_027305.1

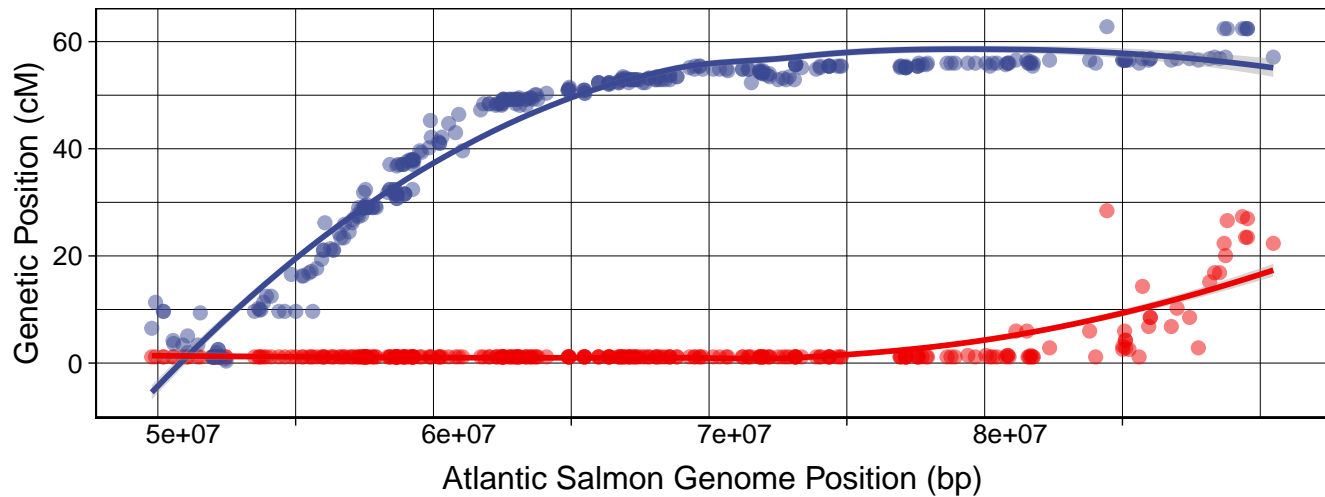

sna24 vs. NC\_027314.1

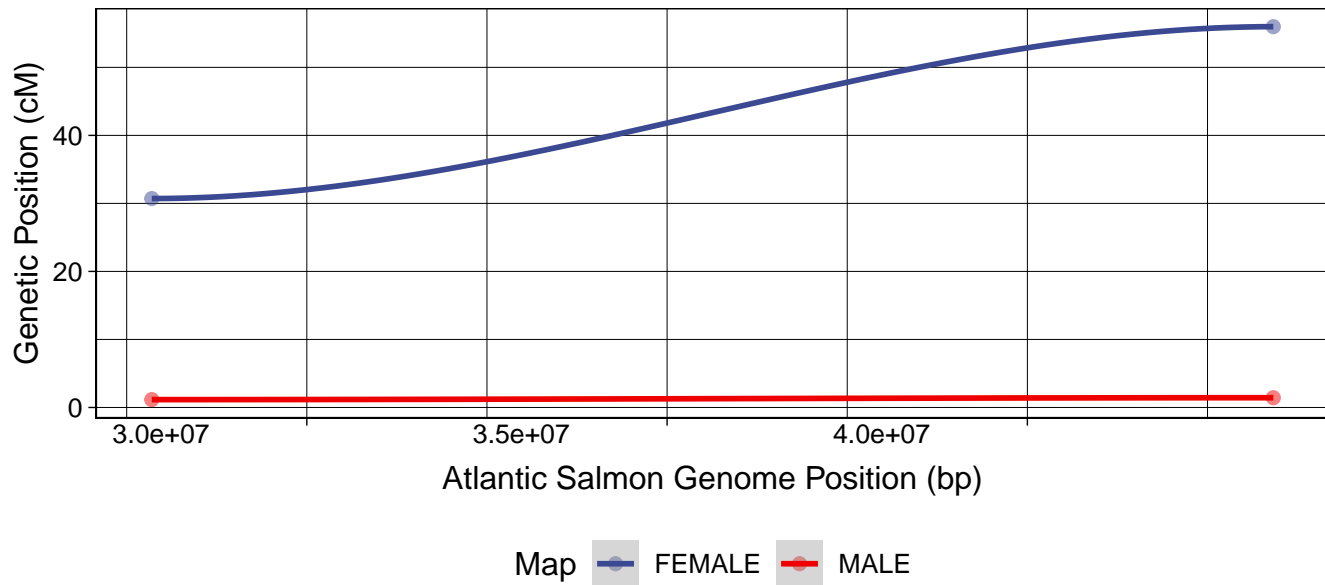

sna25 vs. NC\_027302.1

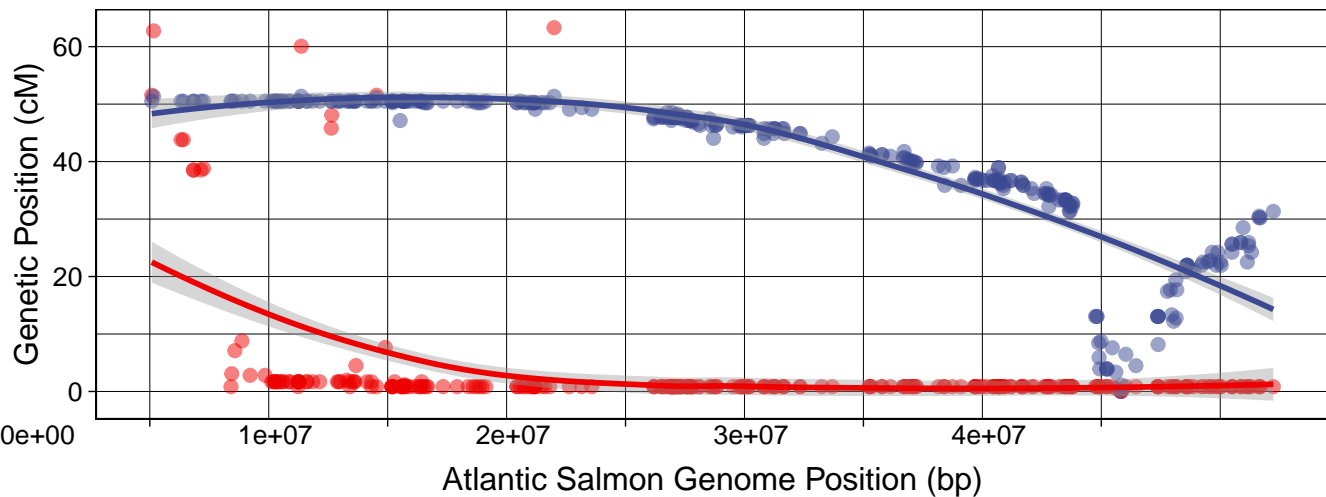

sna25 vs. NC\_027325.1

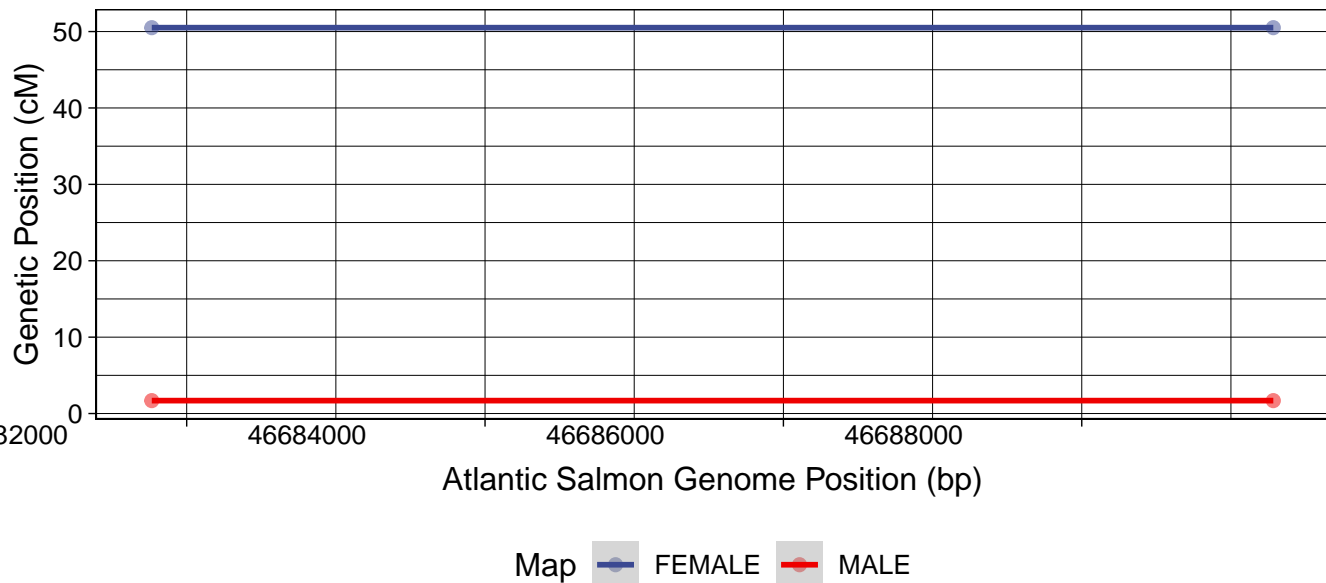

sna26 vs. NC\_027310.1

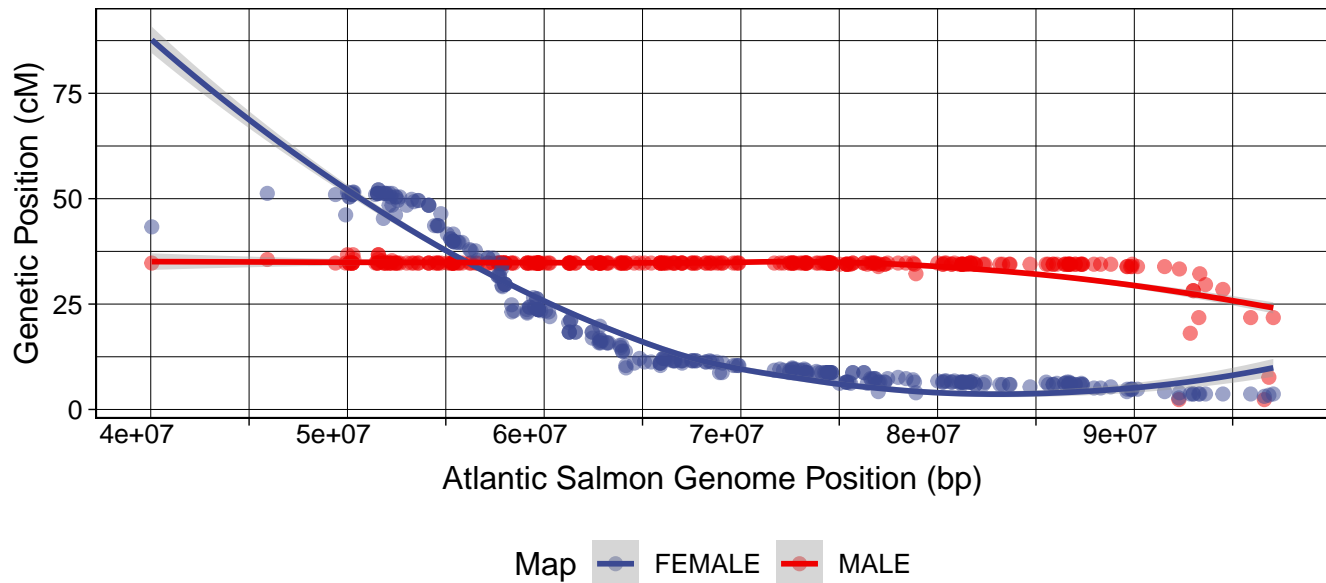

sna26 vs. NW\_012354812.1

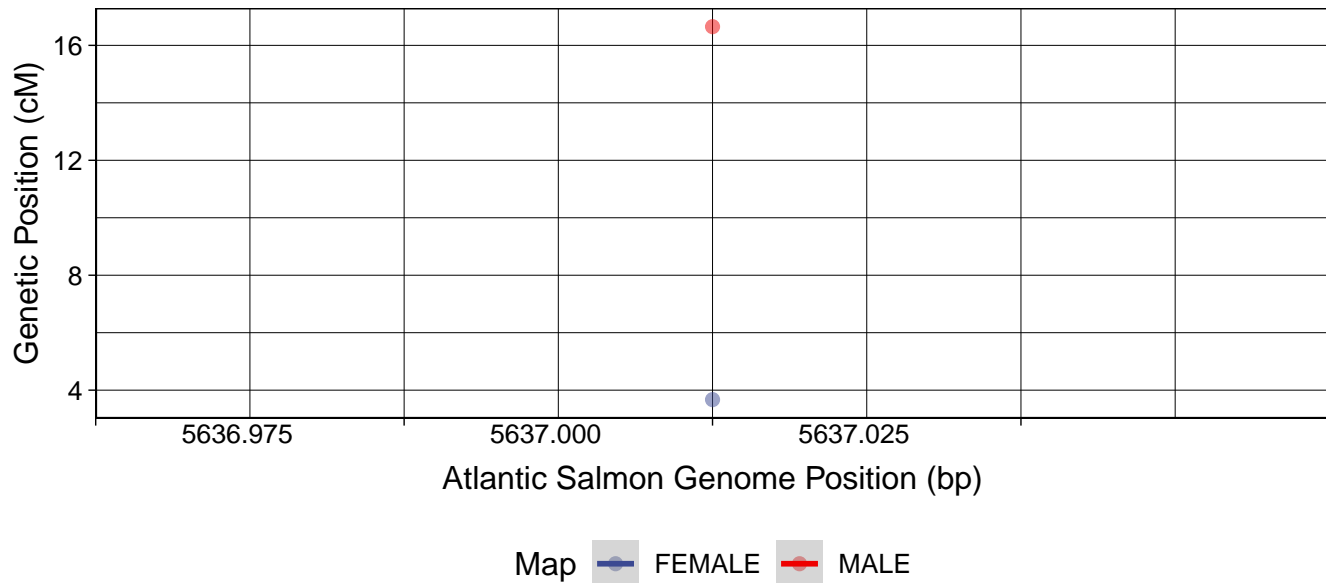

sna27 vs. NC\_027326.1

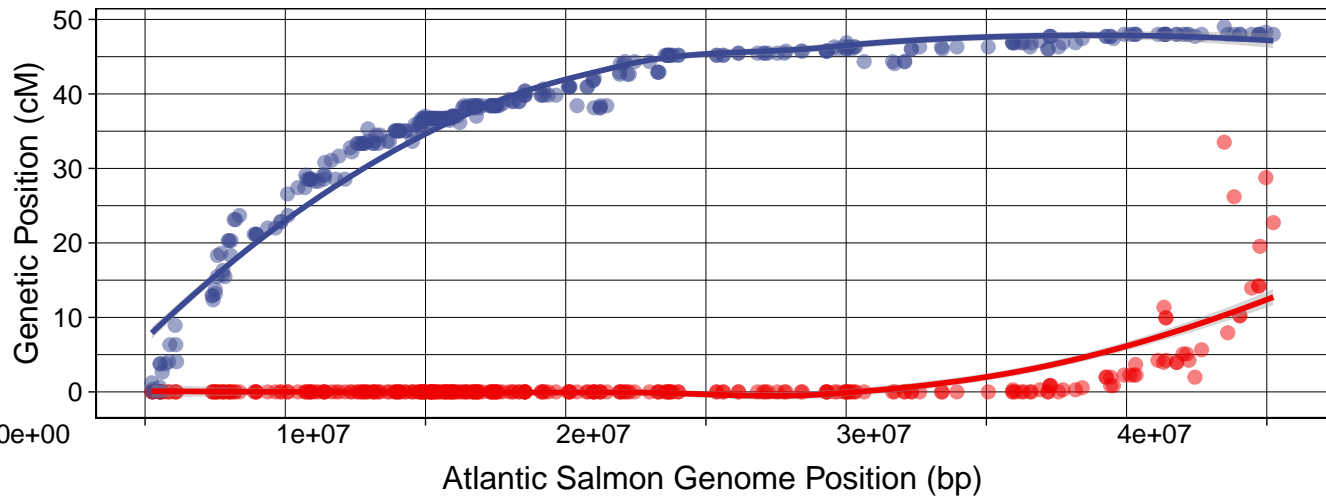

sna27 vs. NW\_012342649.1

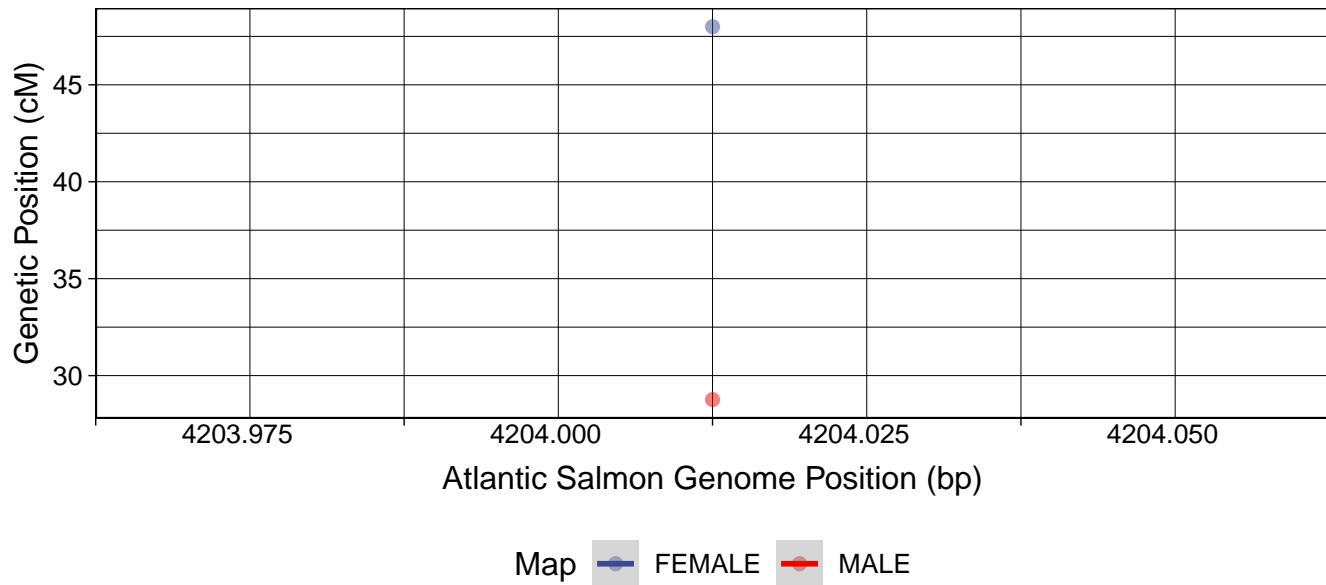

sna28 vs. NC\_027308.1

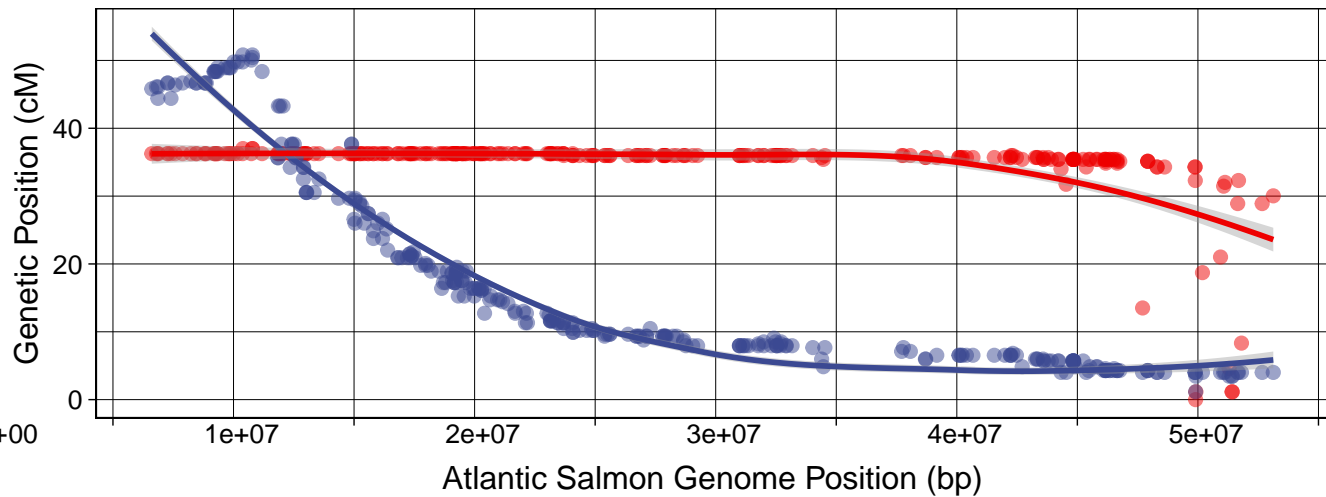

sna28 vs. NC\_027302.1

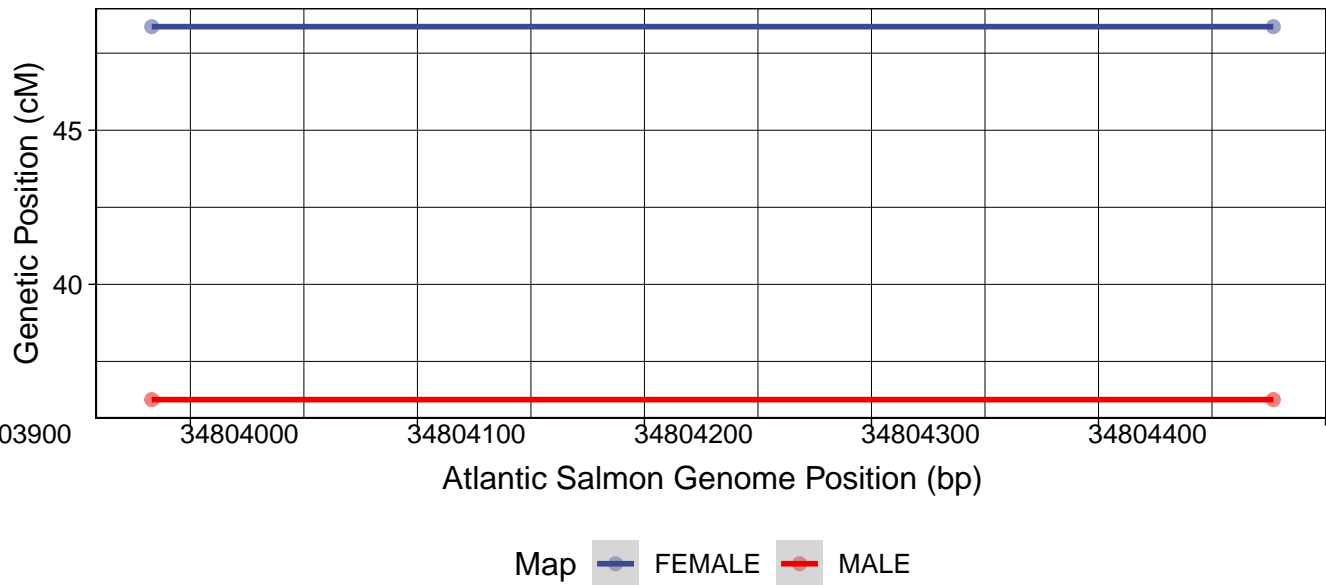

sna29 vs. NC\_027314.1

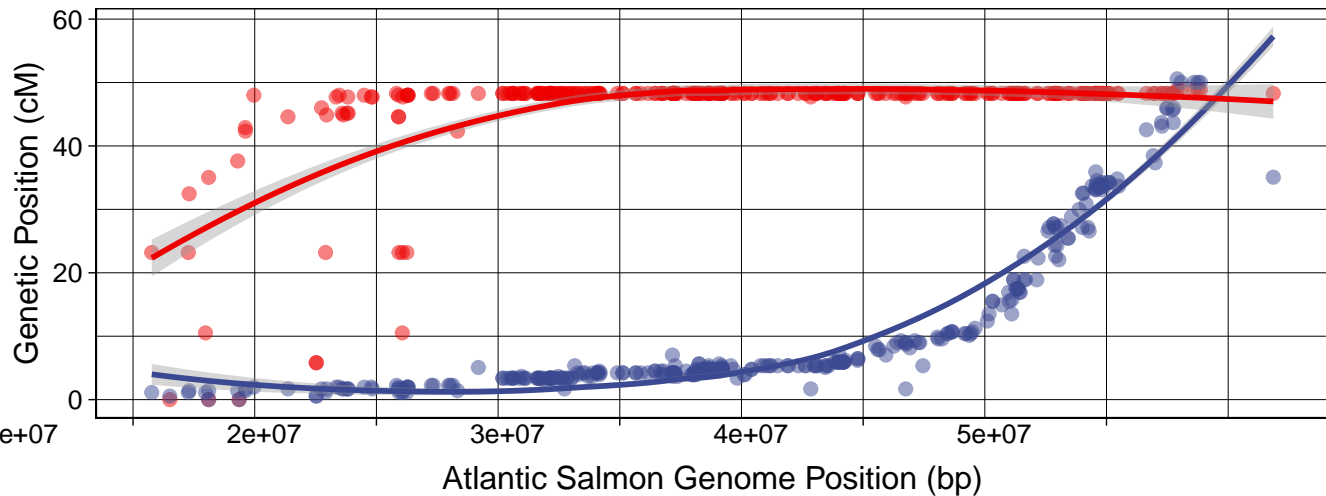

sna29 vs. NW\_012350580.1

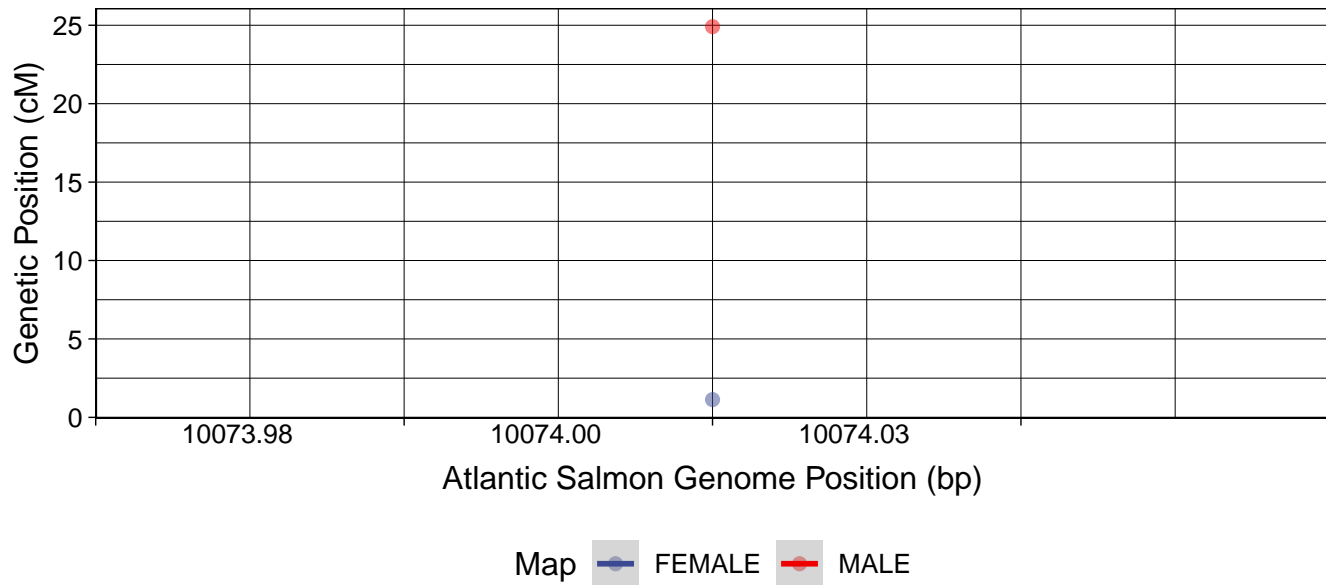

sna30 vs. NC\_027310.1

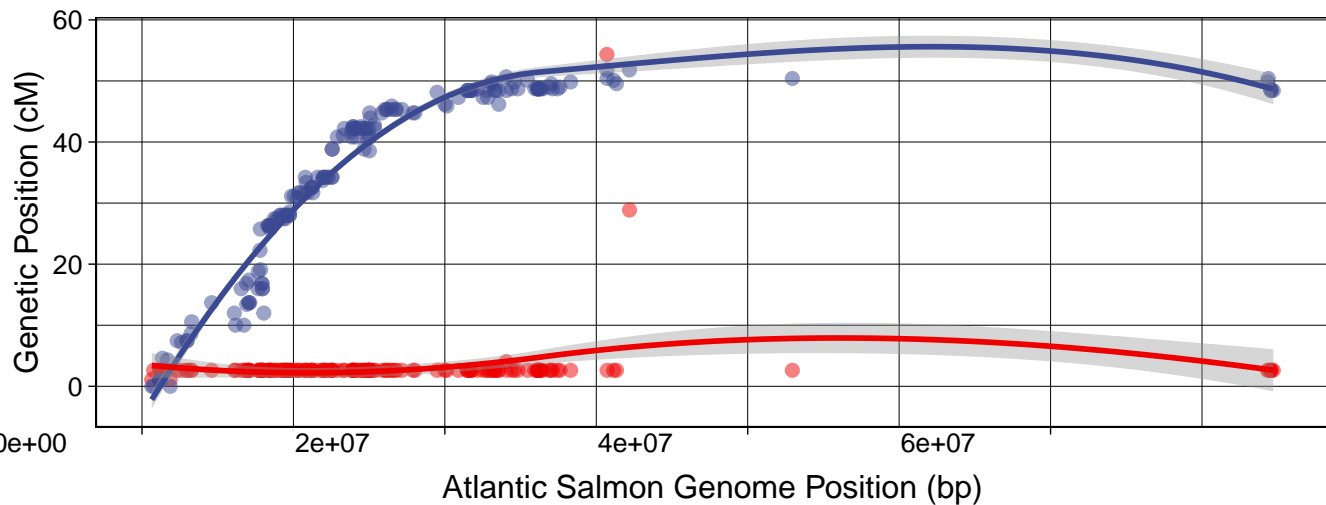

sna30 vs. NC\_027325.1

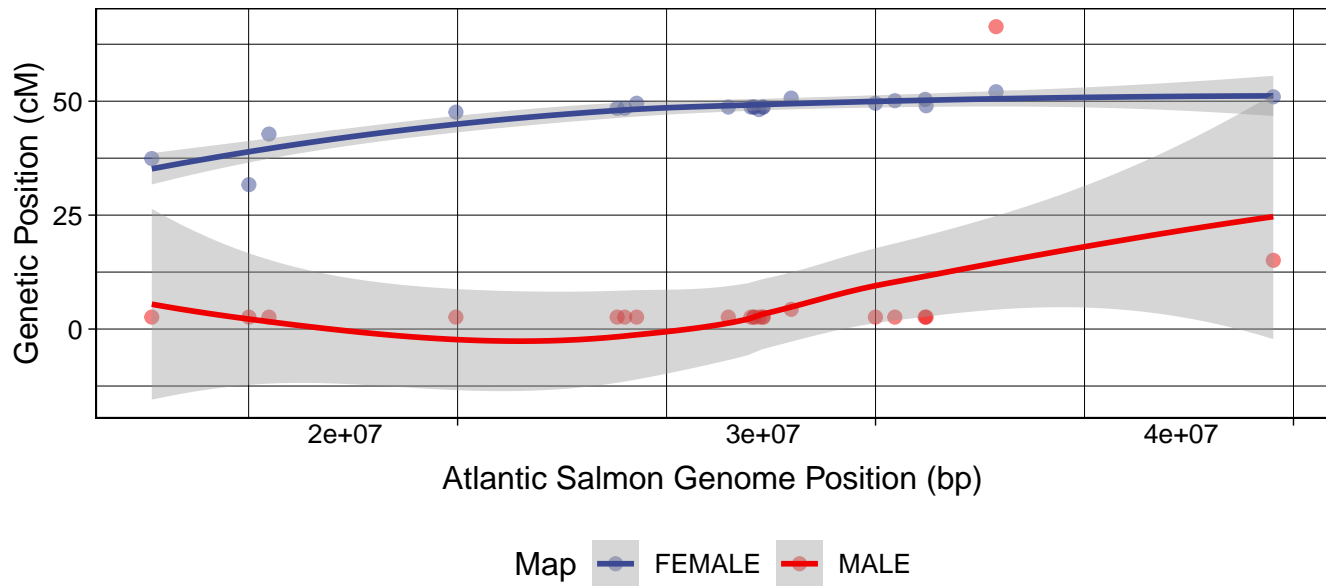

sna31 vs. NC\_027300.1

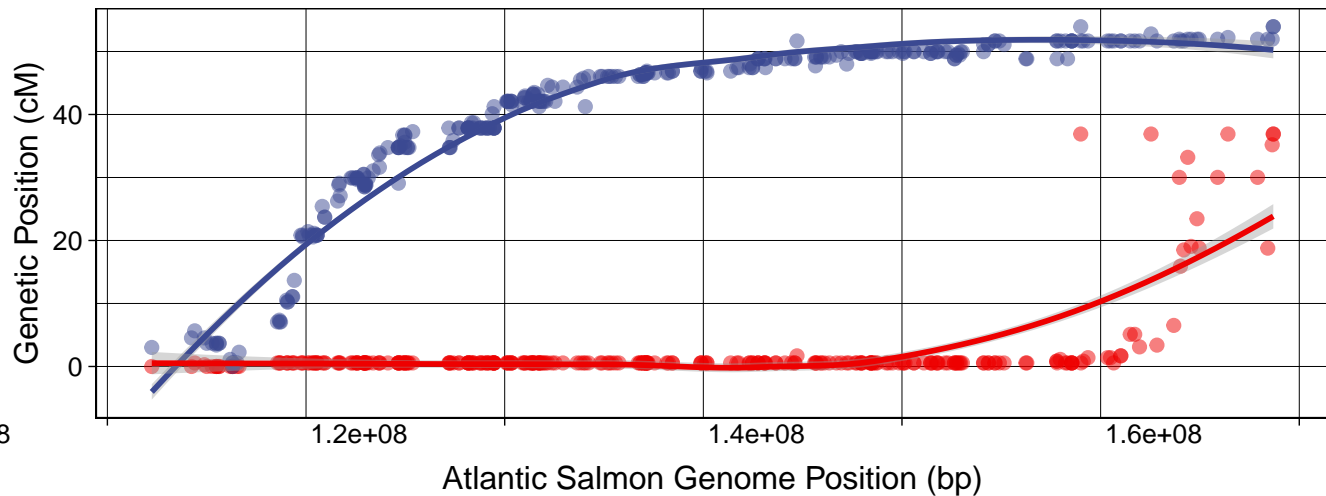

sna31 vs. NW\_012353017.1

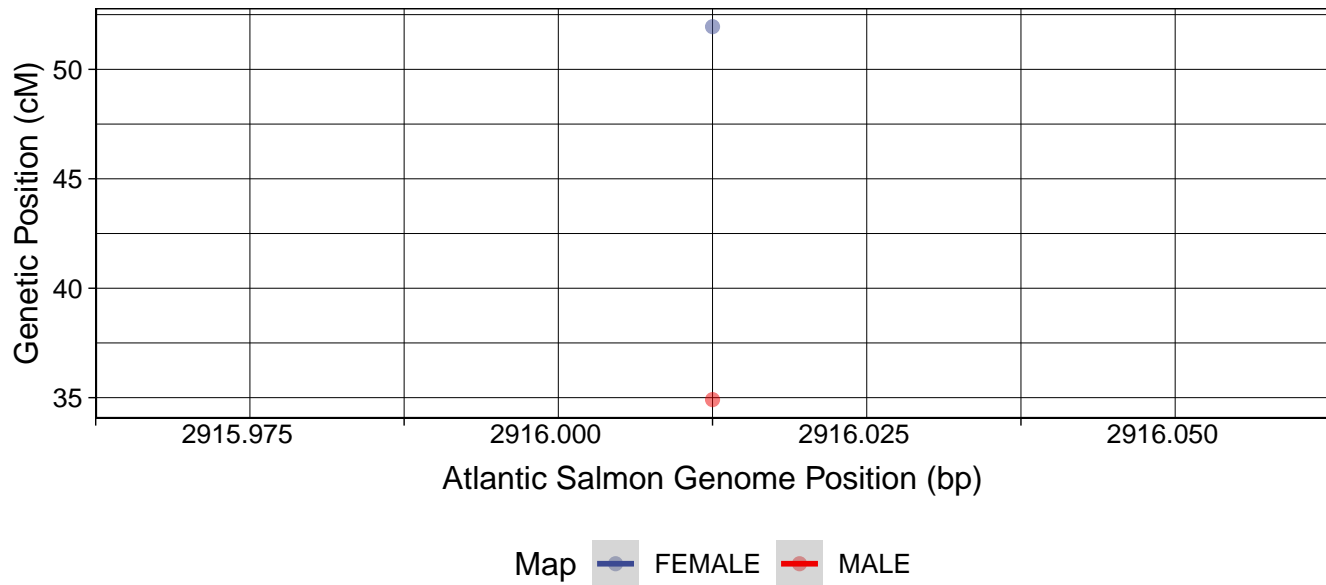



sna32 vs. NC\_027313.1

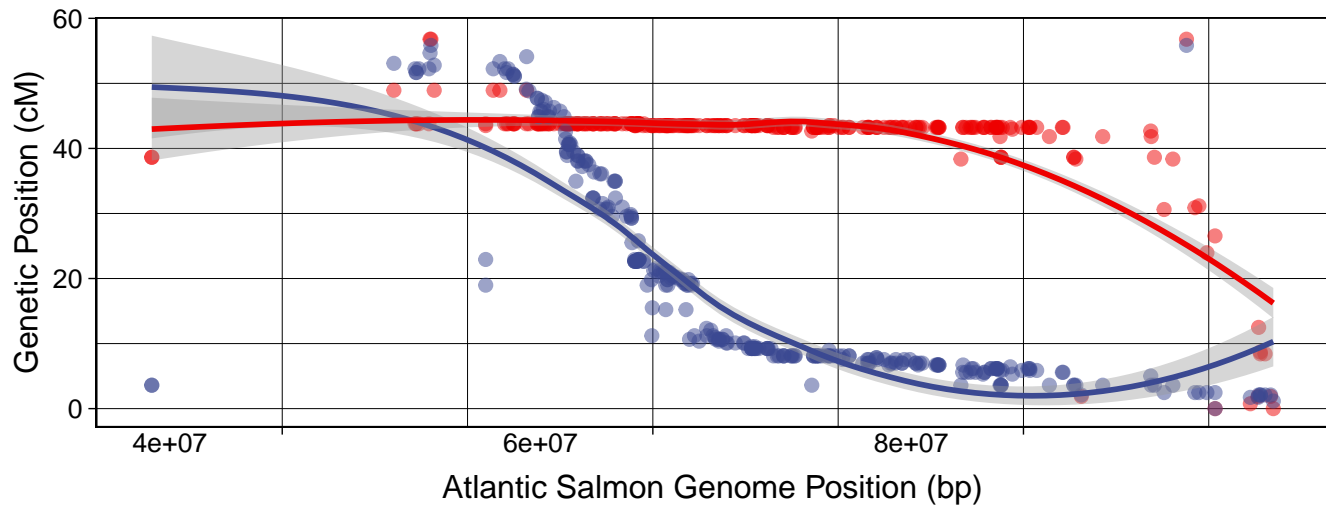

sna32 vs. NW\_012355718.1

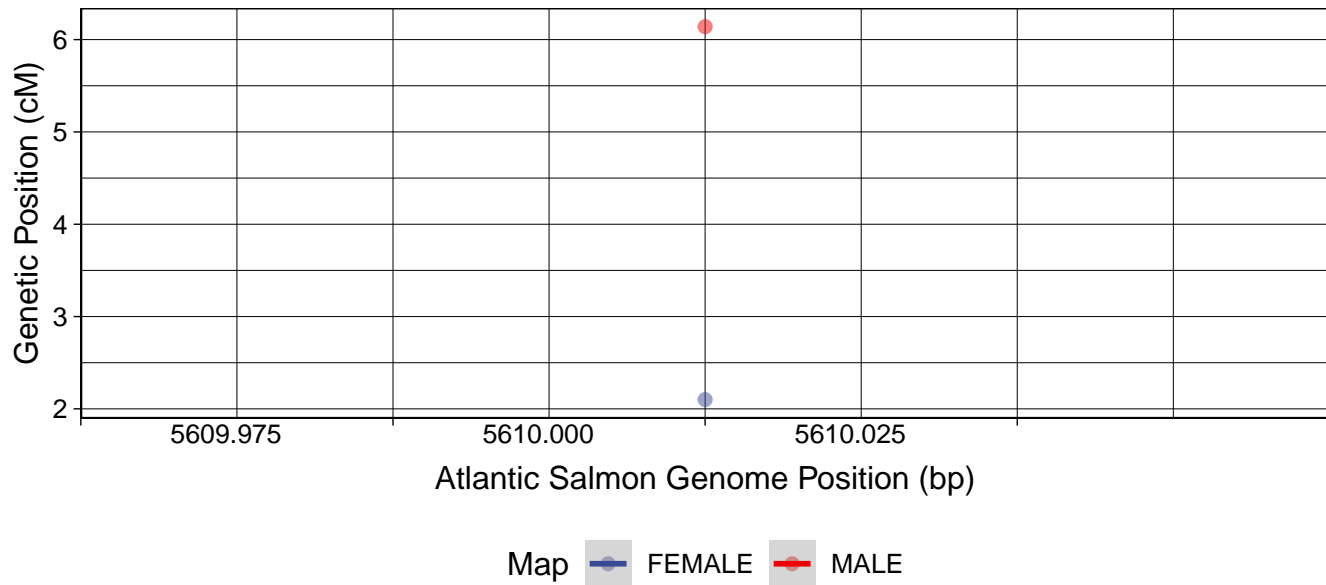

sna33 vs. NC\_027318.1

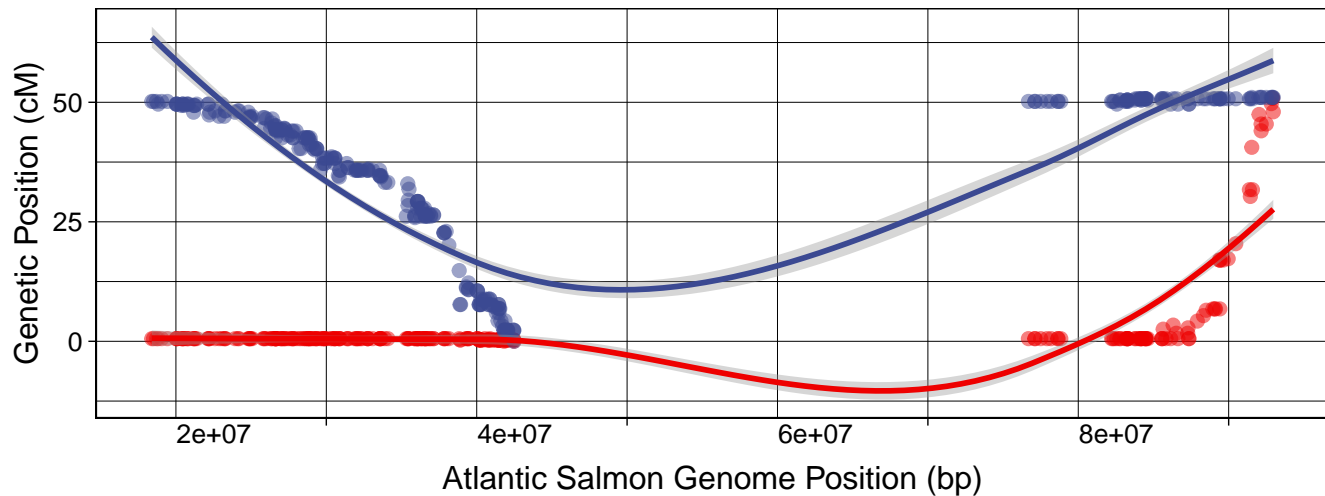

sna33 vs. NW\_012361428.1

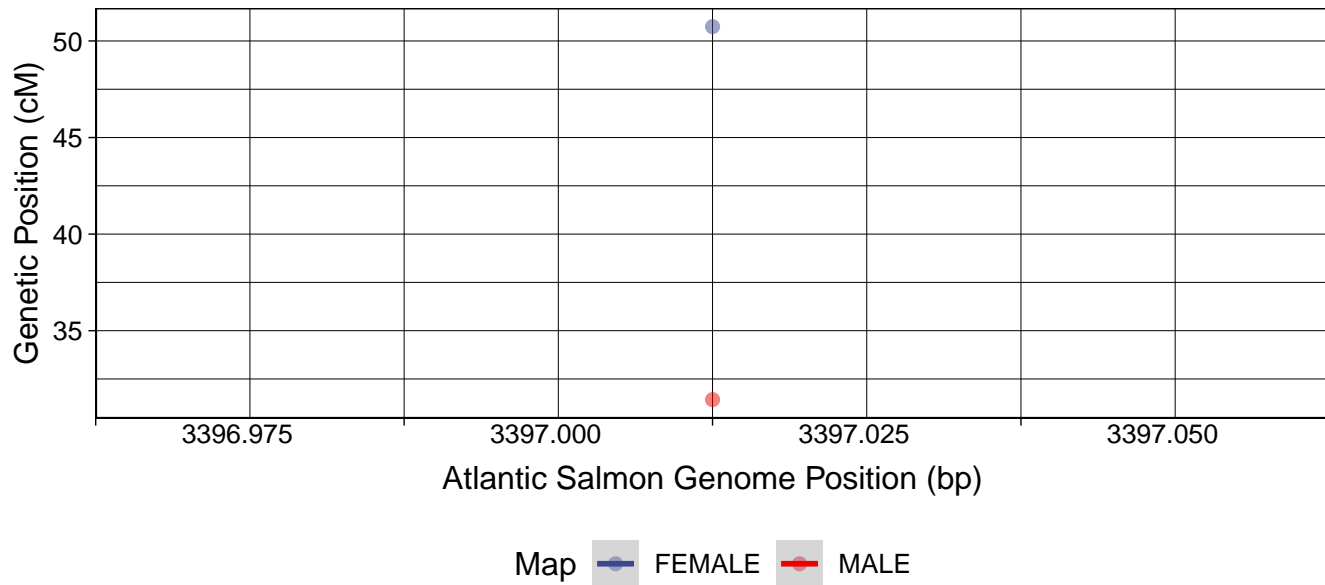

sna34 vs. NC\_027308.1

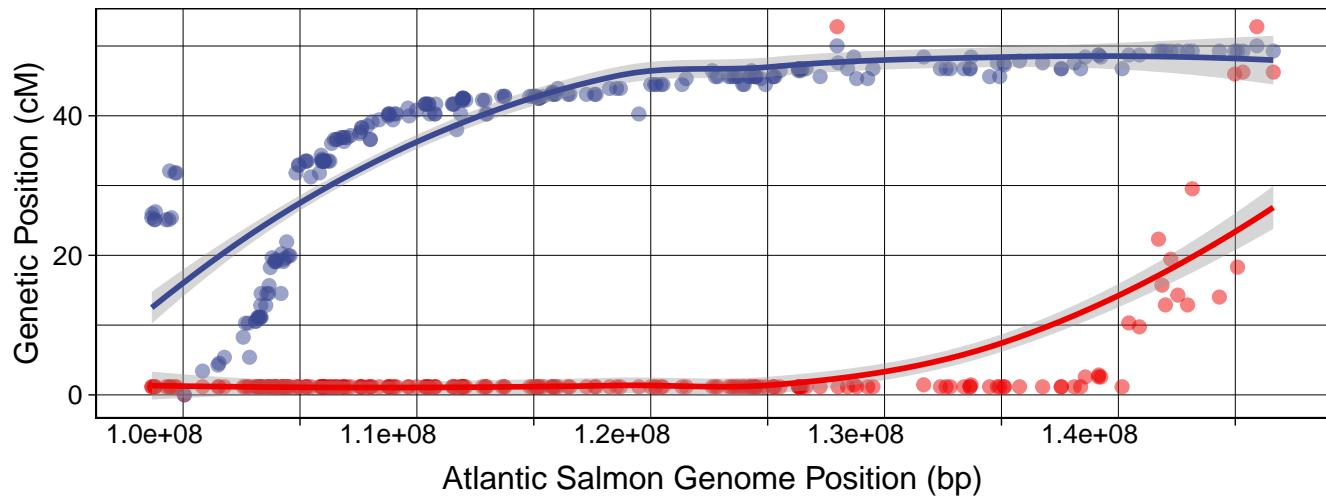

sna34 vs. NW\_012347327.1

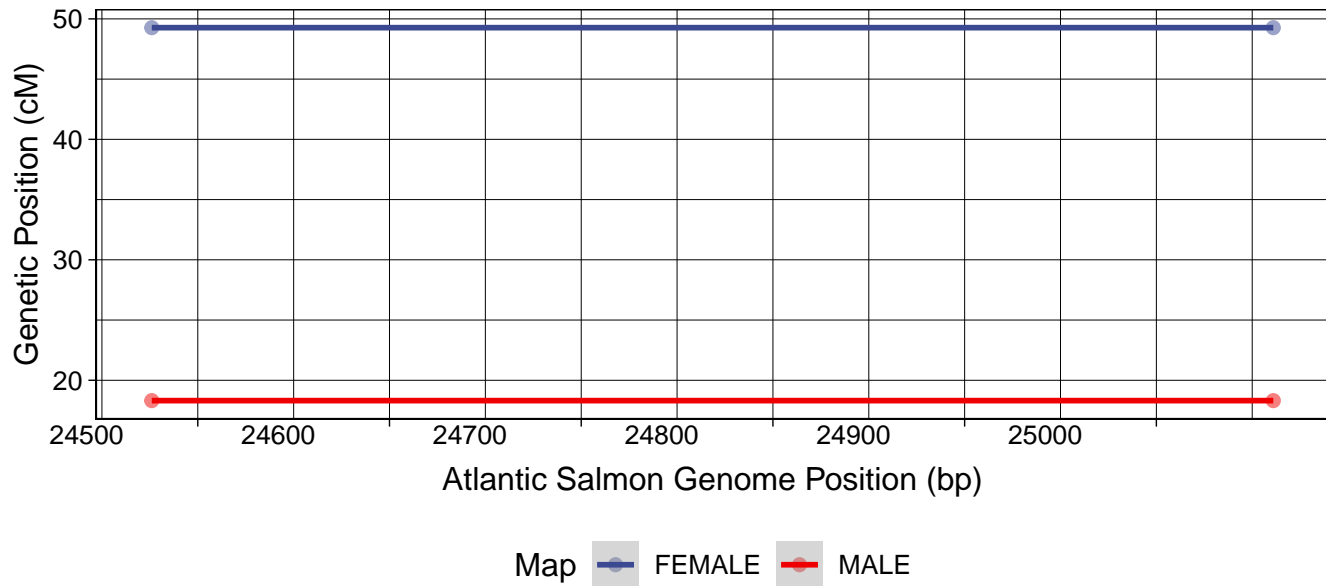

sna35 vs. NC\_027327.1

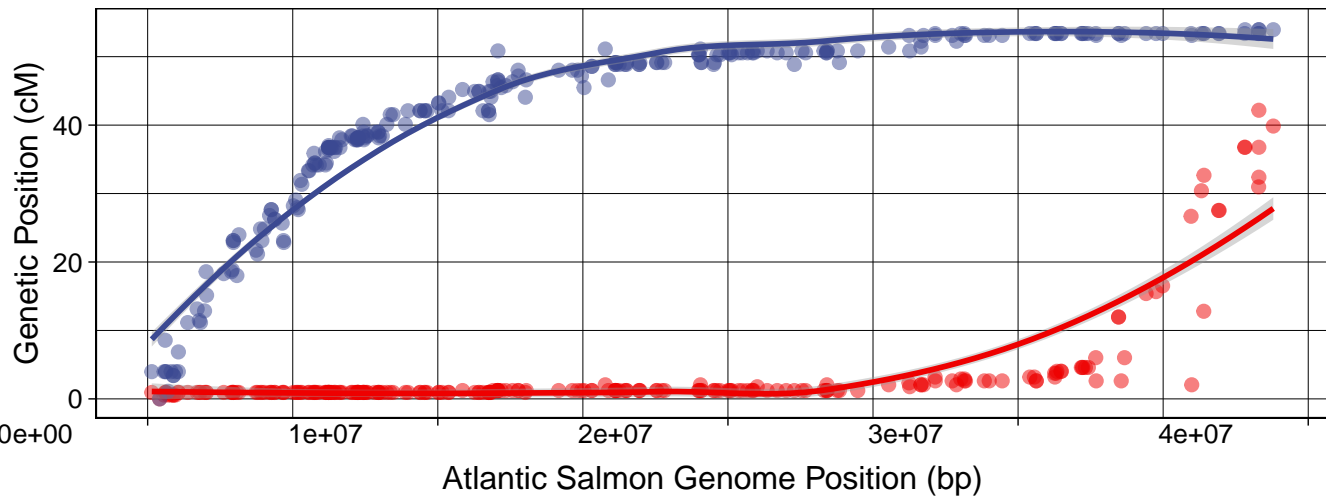

sna35 vs. NW\_012348867.1

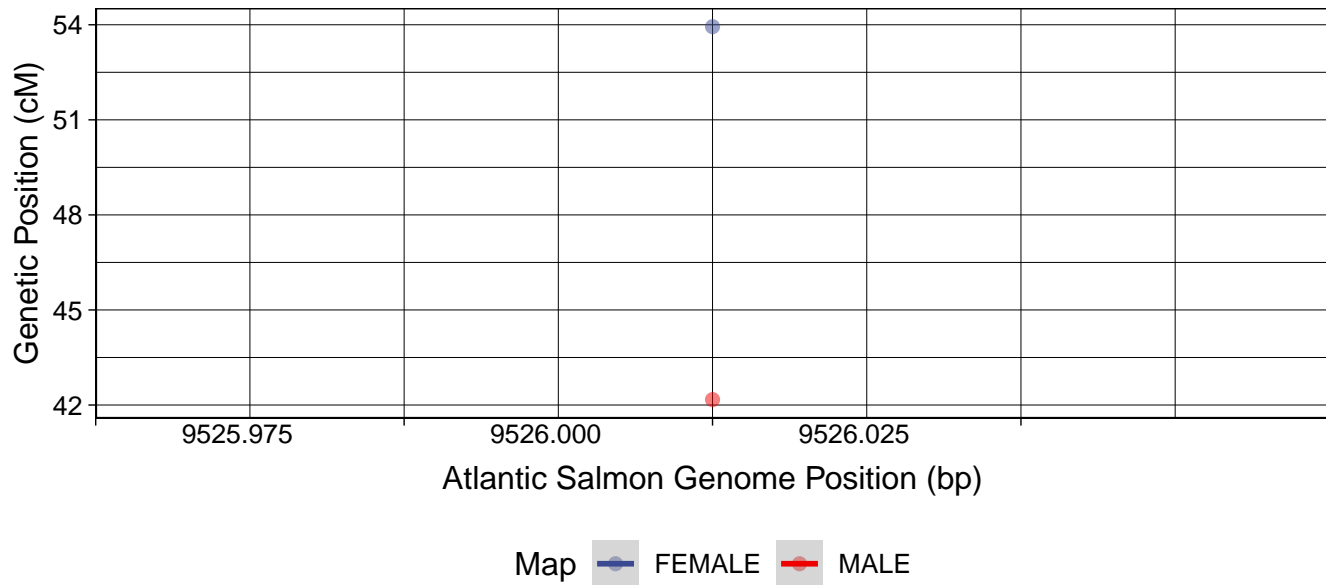

sna36 vs. NC\_027317.1

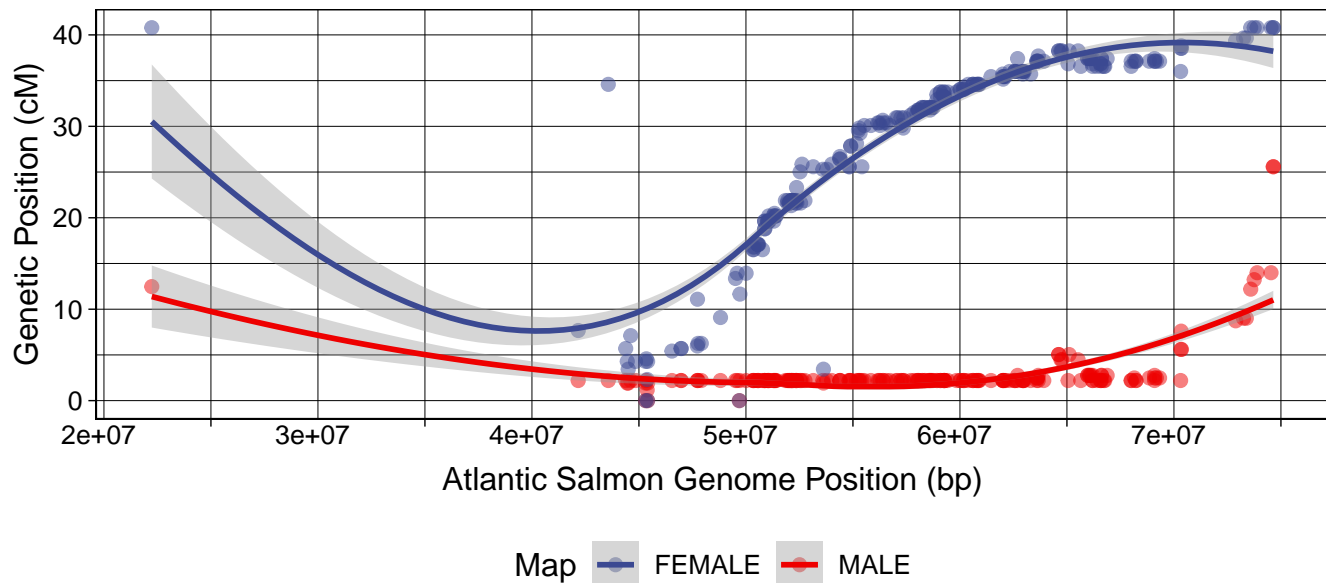

sna36 vs. NW\_012351883.1

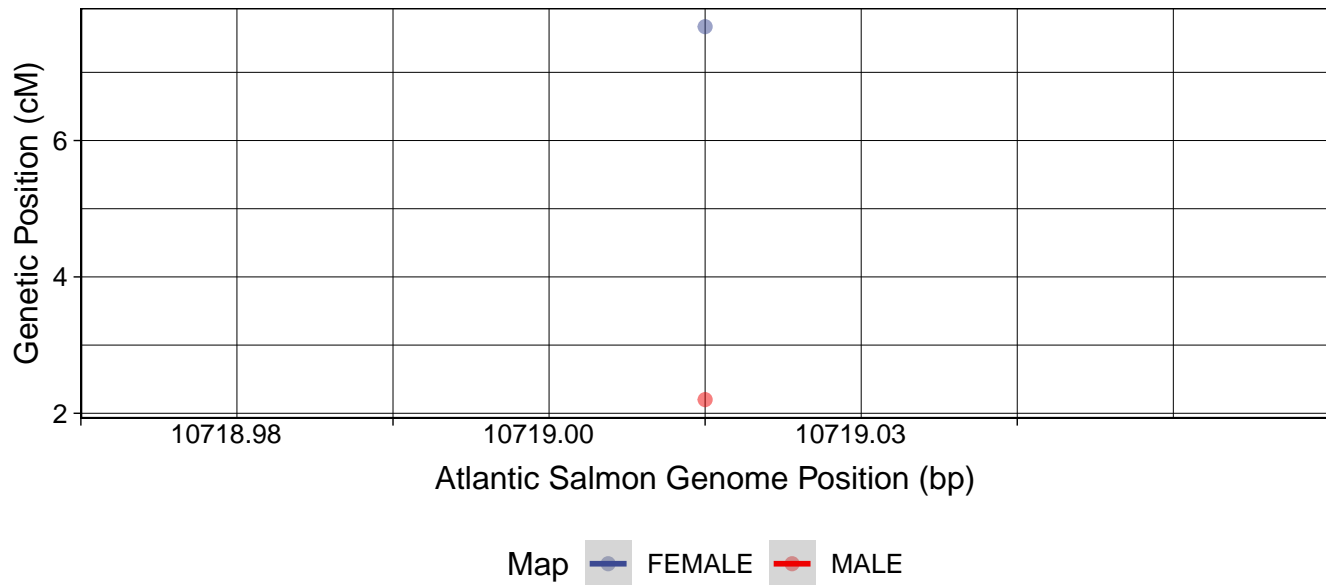

sna37 vs. NC\_027301.1

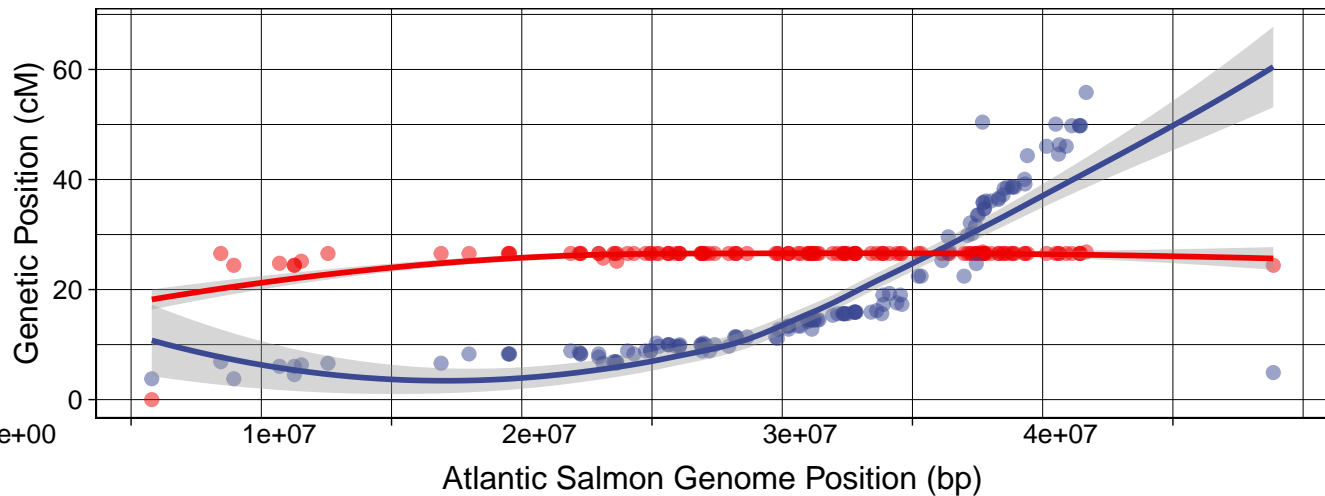

sna37 vs. NC\_027304.1

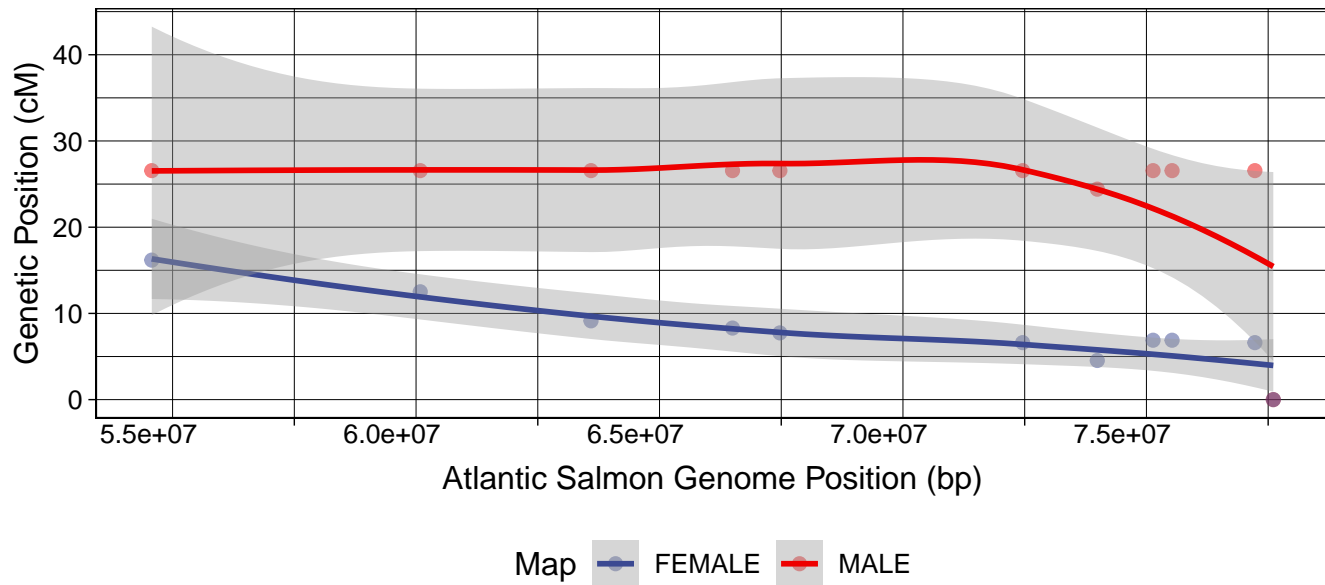

sna38 vs. NC\_027316.1

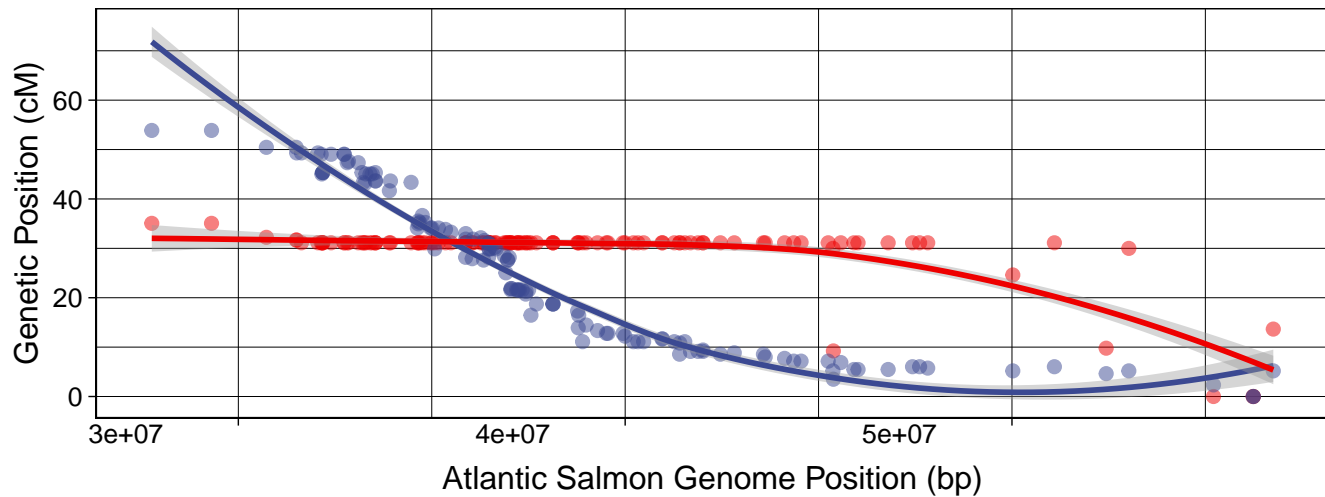

sna38 vs. NC\_027306.1

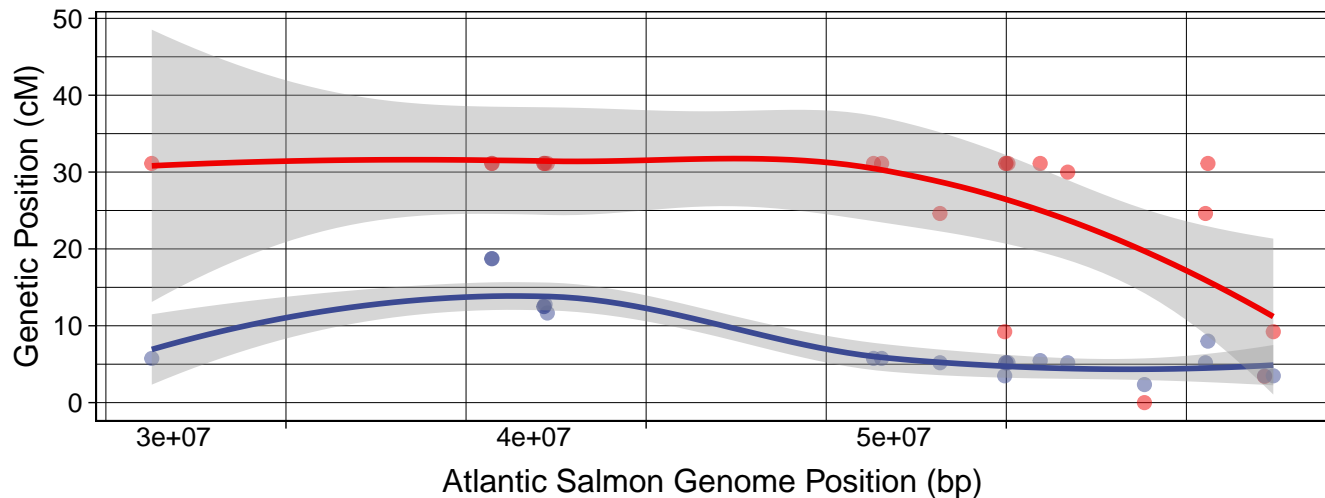

sna39 vs. NC\_027301.1

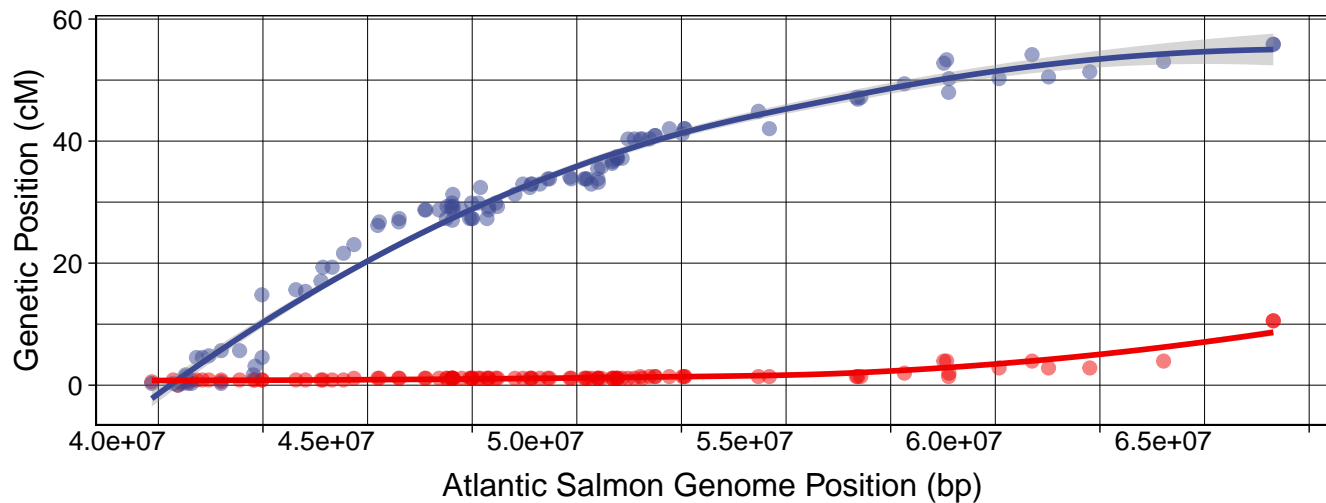

sna39 vs. NC\_027311.1

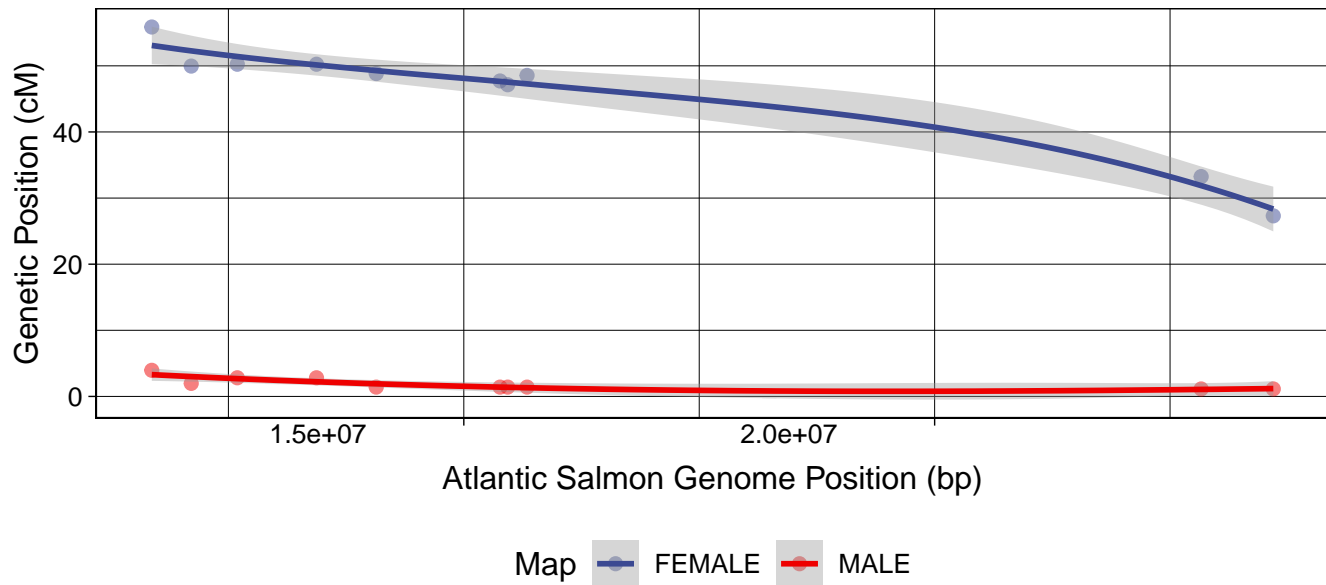



sna40 vs. NC\_027316.1

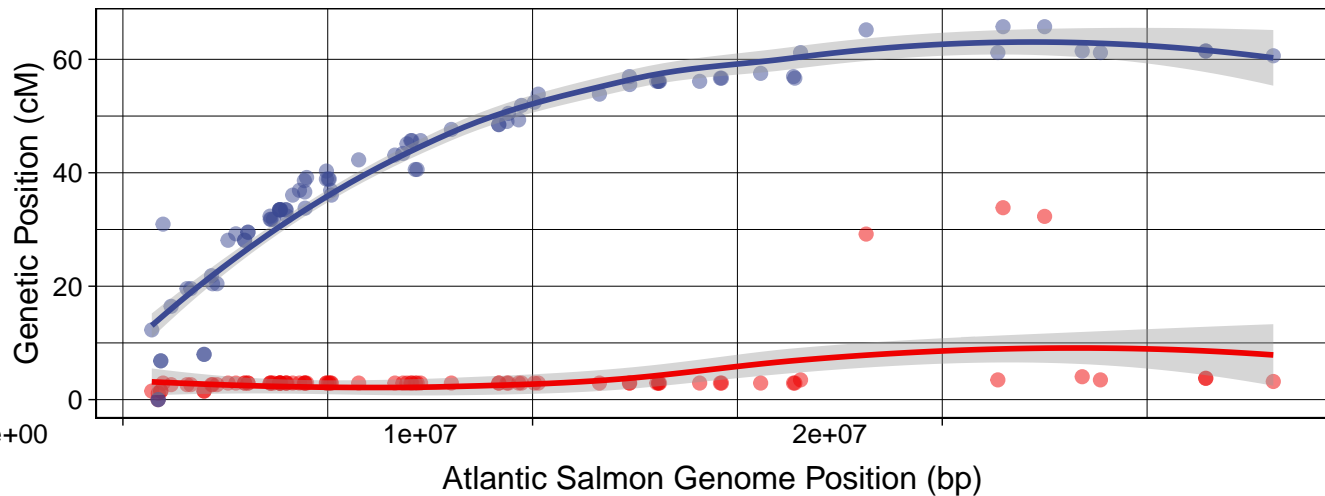

sna40 vs. NC\_027315.1

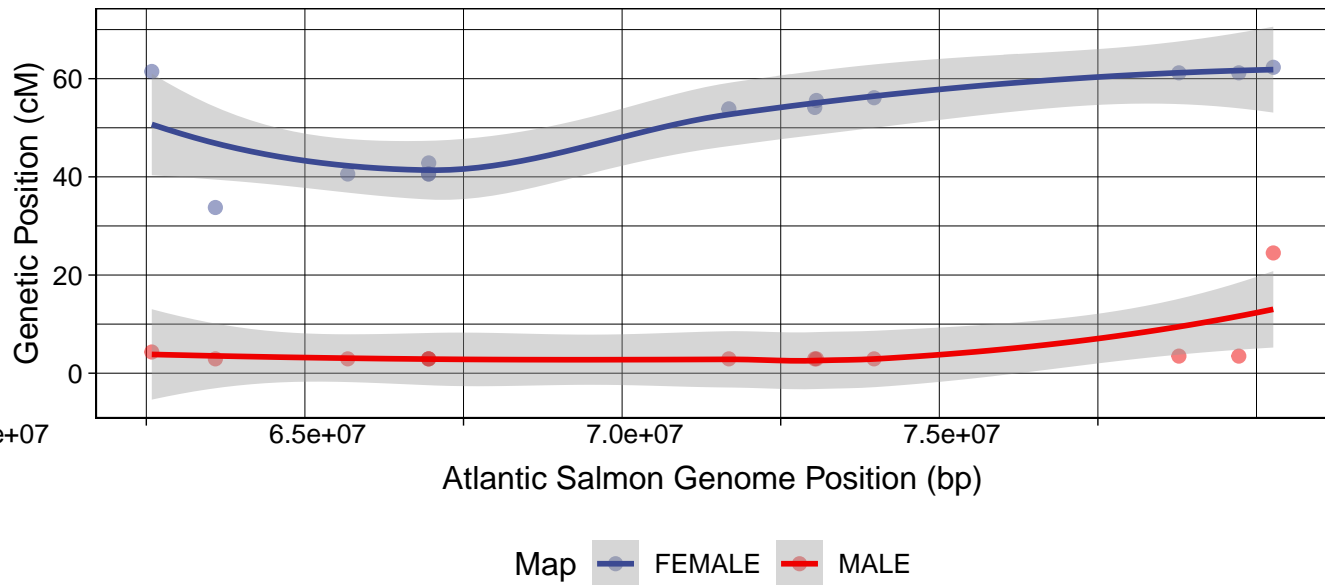

sna41 vs. NC\_027305.1

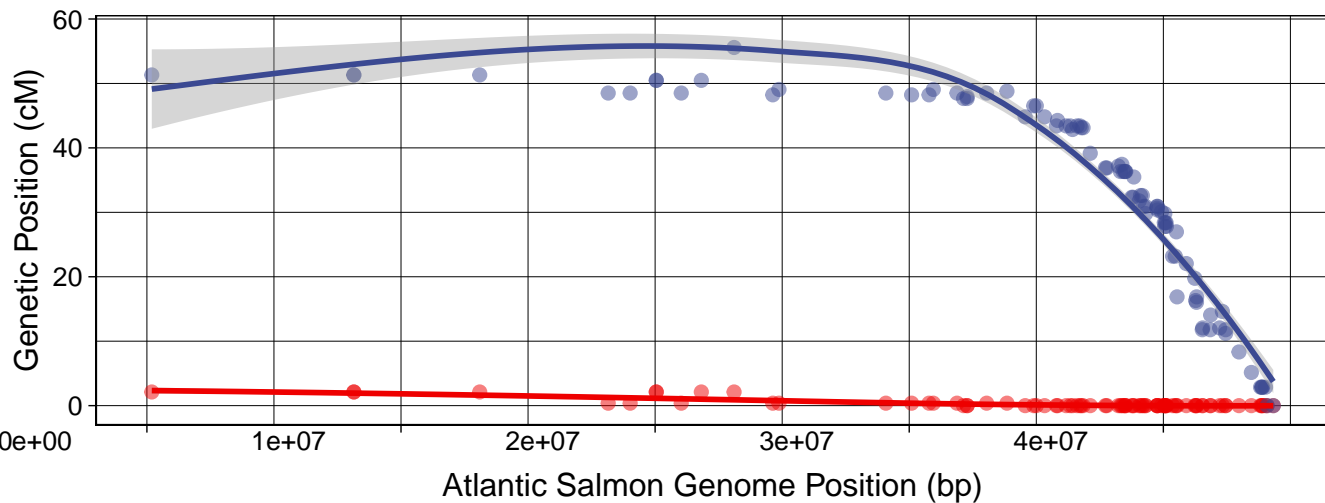

sna41 vs. NC\_027302.1

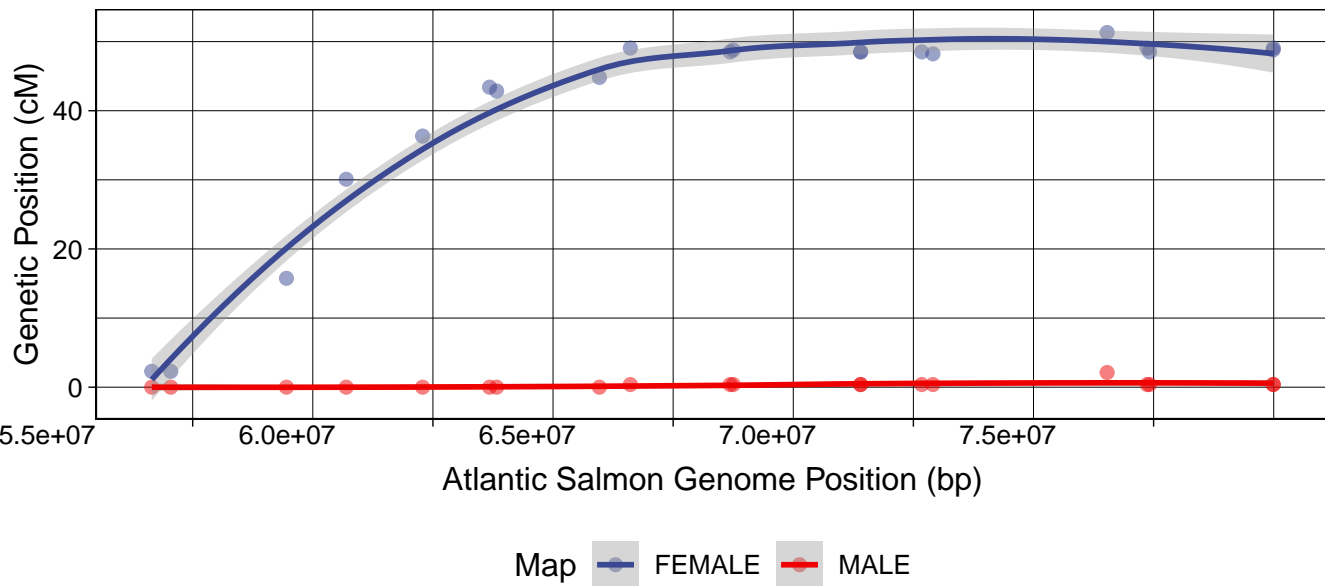

sna42 vs. NC\_027307.1

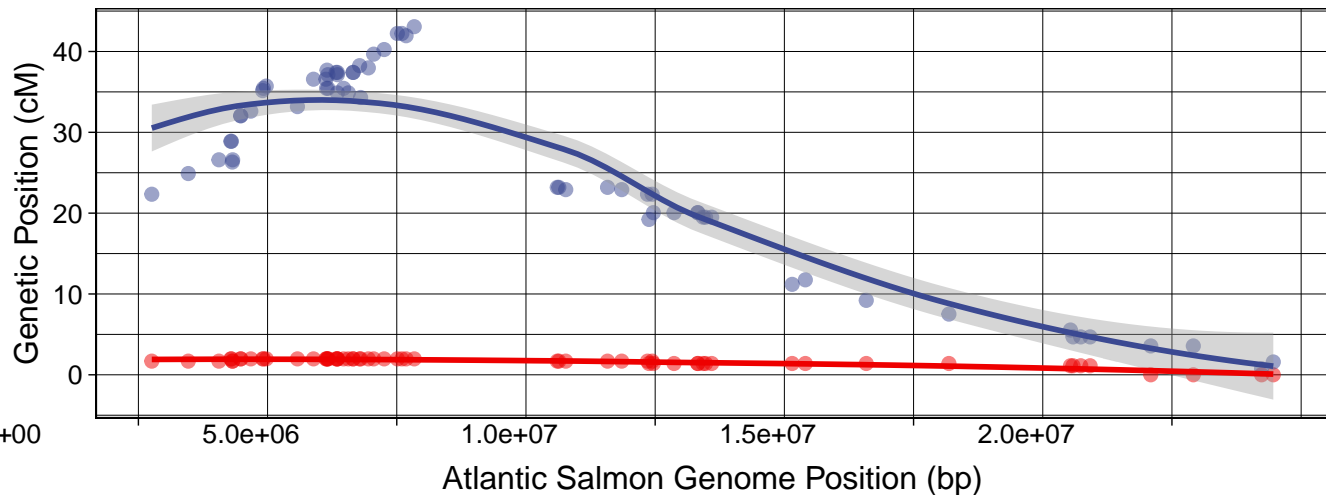

sna42 vs. NC\_027303.1

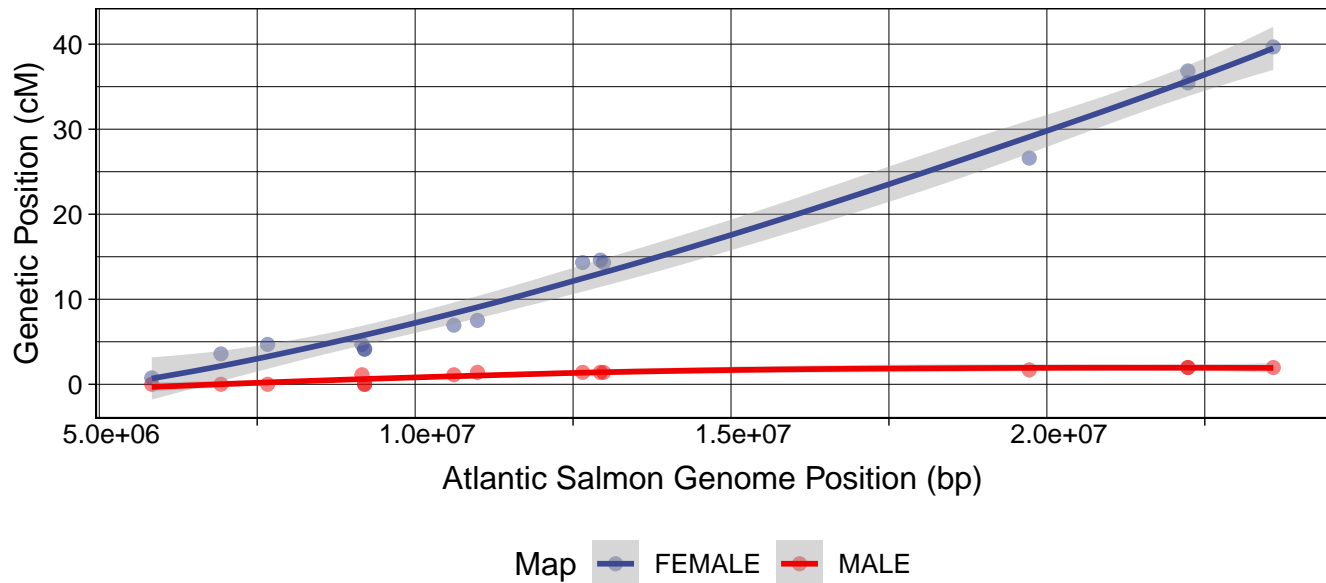

Supplement: Supplementary file 5 [file 1]
