# Supplementary material
Source: publisher figshare collection journal article supplement (https://gsajournals.figshare.com/articles/dataset/_/11908326)

**Figure S2:** Alignments of male and female lake trout linkage maps to the Rainbow Trout chromosomes. The following figures display the linkage map position on the Y-axis and the chromosomal position on the X-axis for the two chromosomes with the most alignments for a given linkage group. Figure headings list the lake trout linkage group first (sna1-42) and the Rainbow Trout chromosome to which they align second. The male linkage map is displayed in red and the female linkage map is displayed in blue.

sna1 vs. omy6

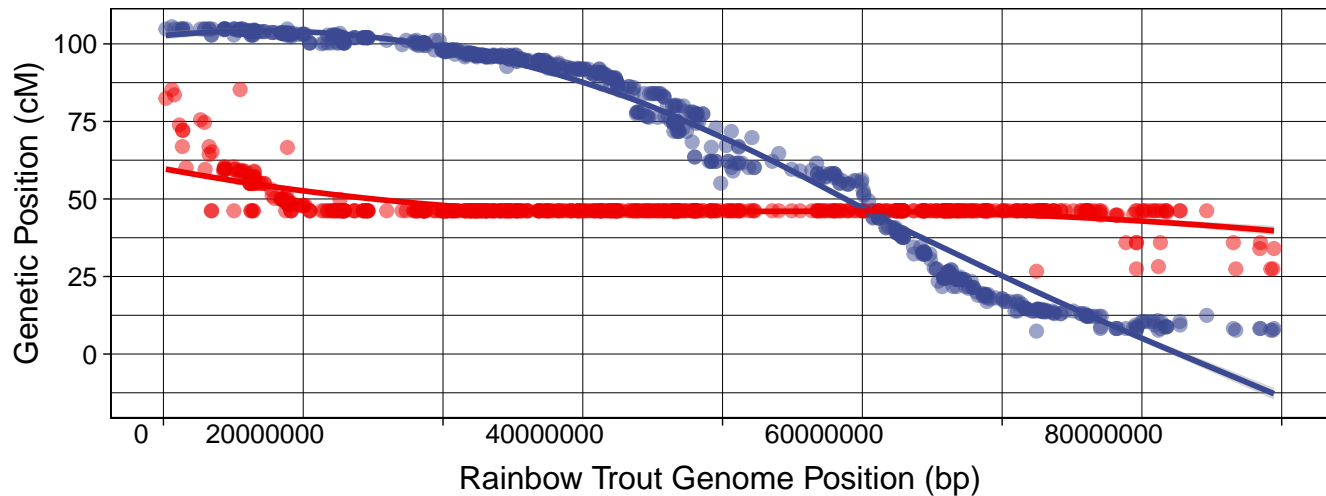

sna1 vs. omy26

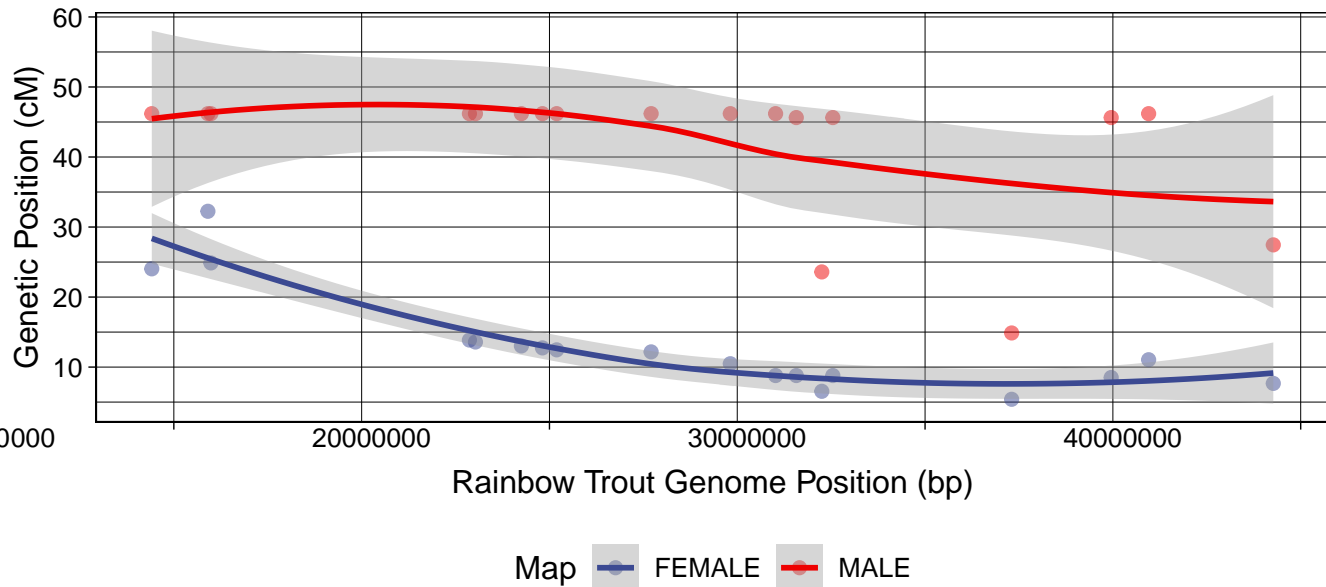

sna2 vs. omy17

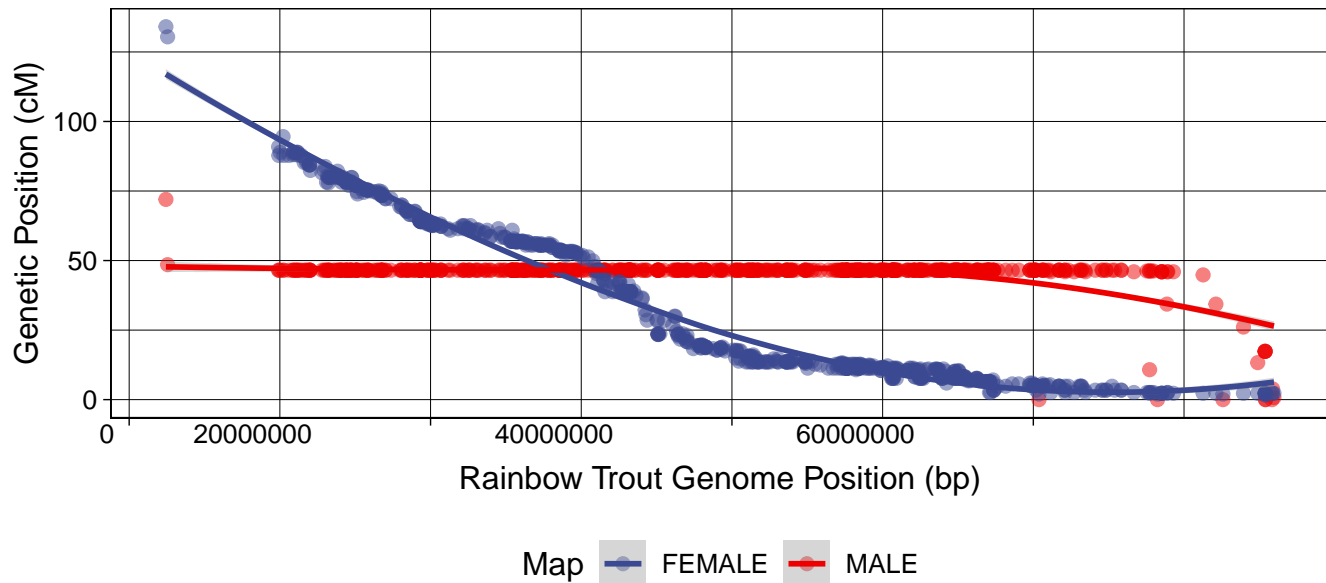

sna2 vs. omy13

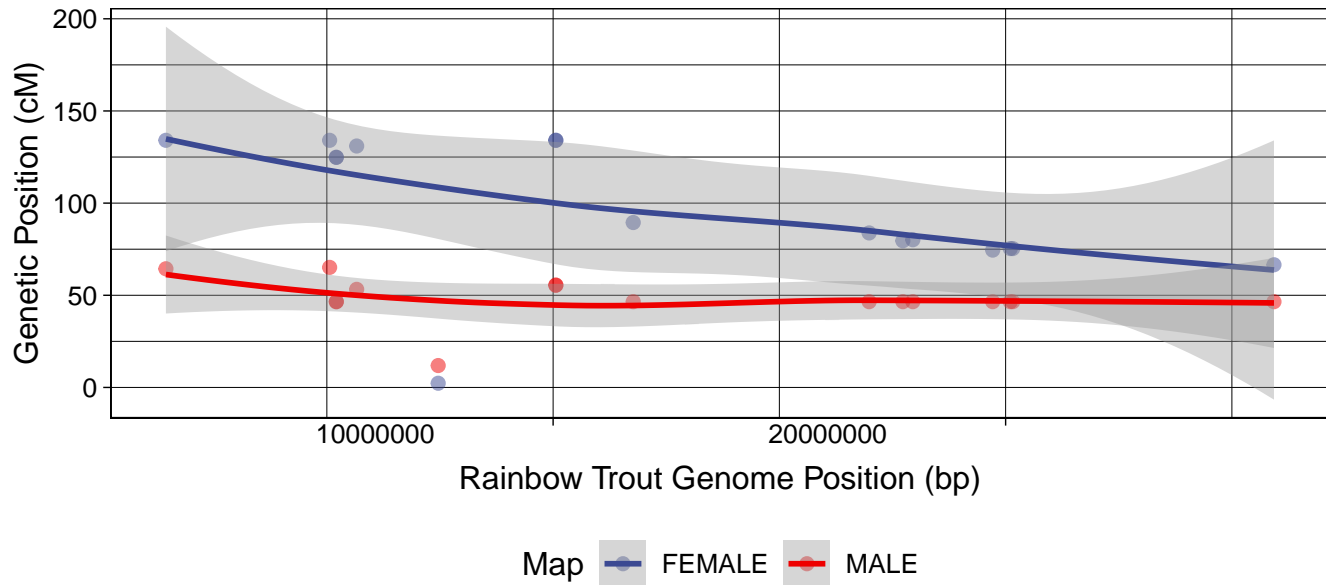

sna3 vs. omy12

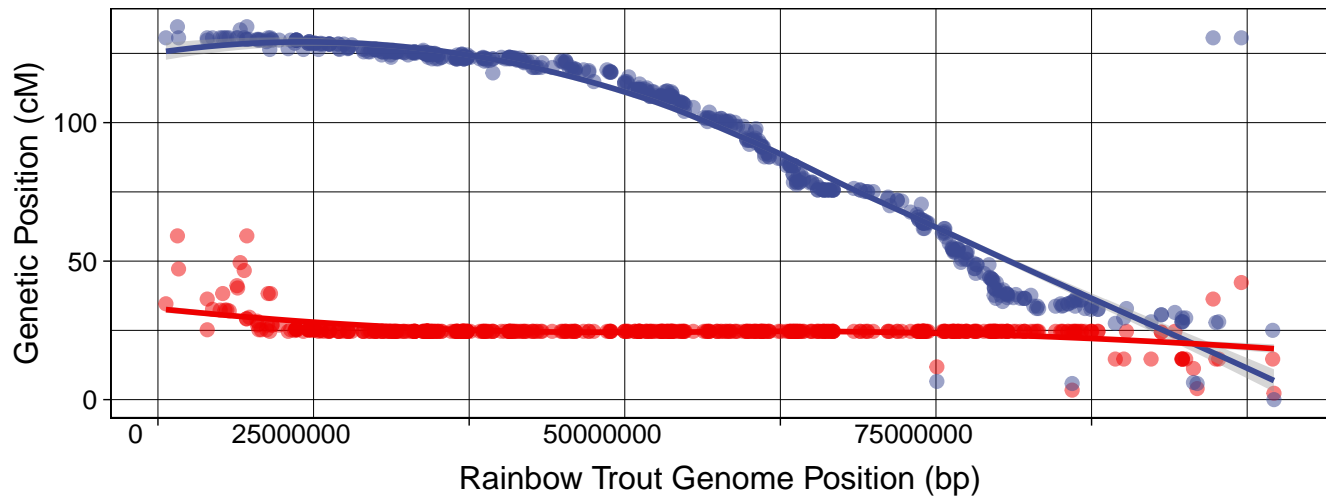

Map  FEMALE  MALE

sna3 vs. omy13

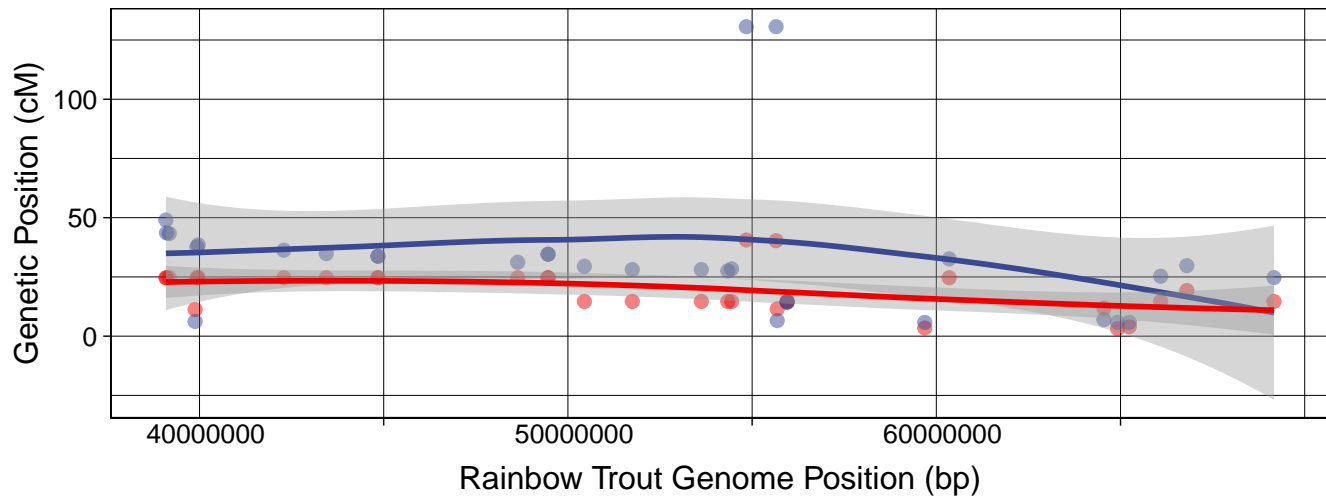

Map  FEMALE  MALE

sna4 vs. omy23

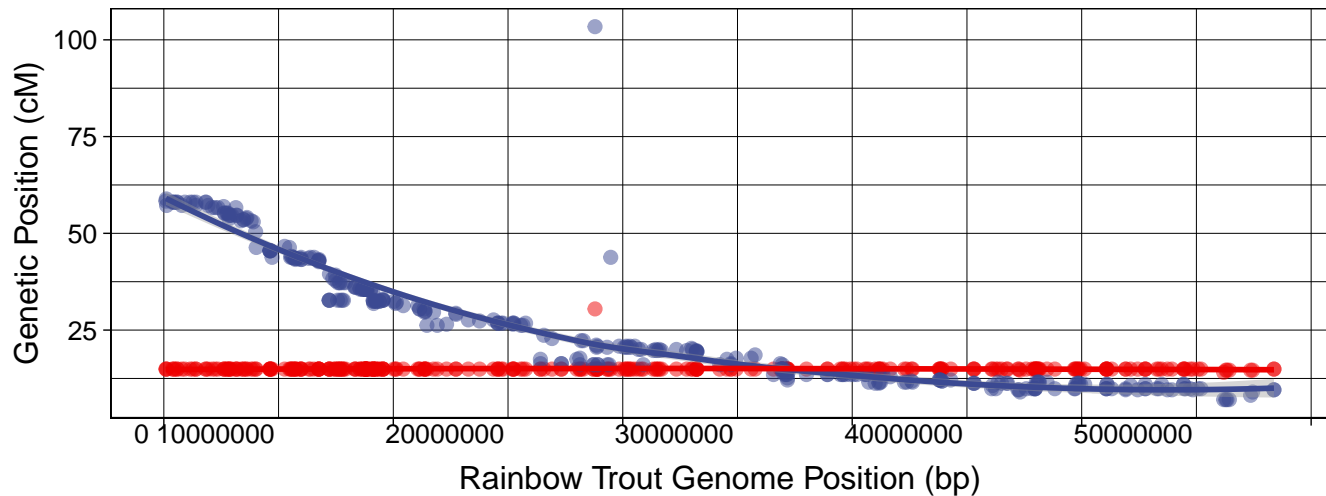

sna4 vs. omy16

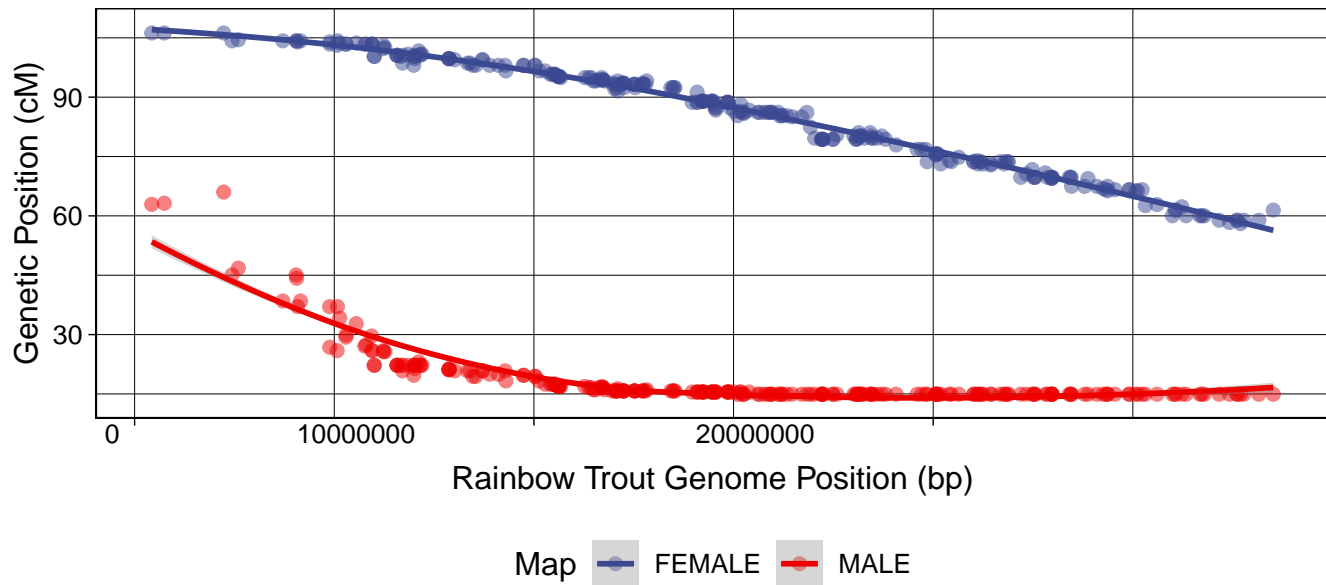

sna5 vs. omy14

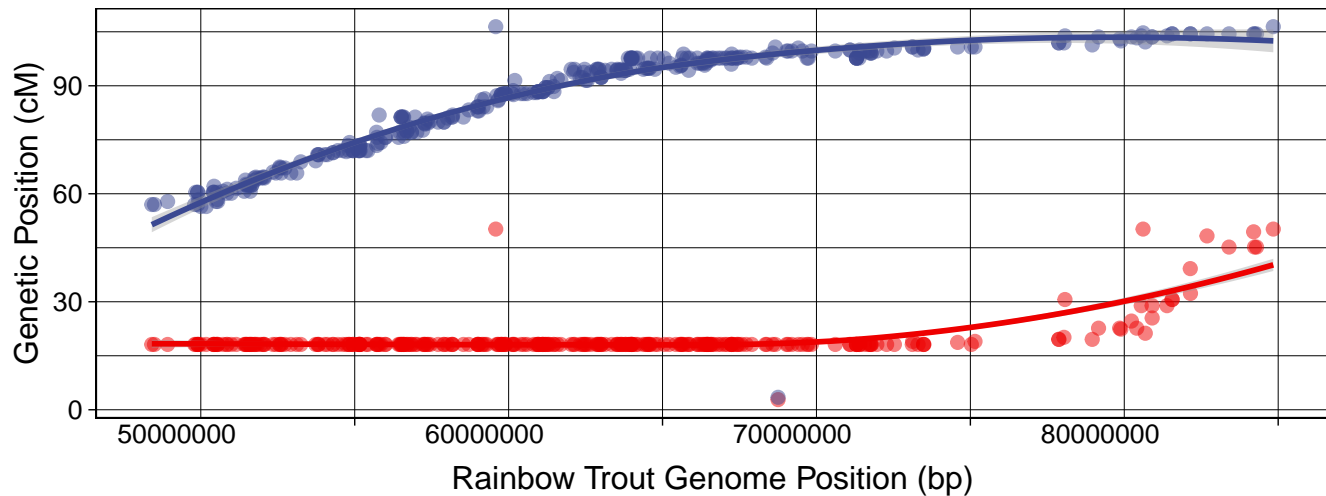

sna5 vs. omy2

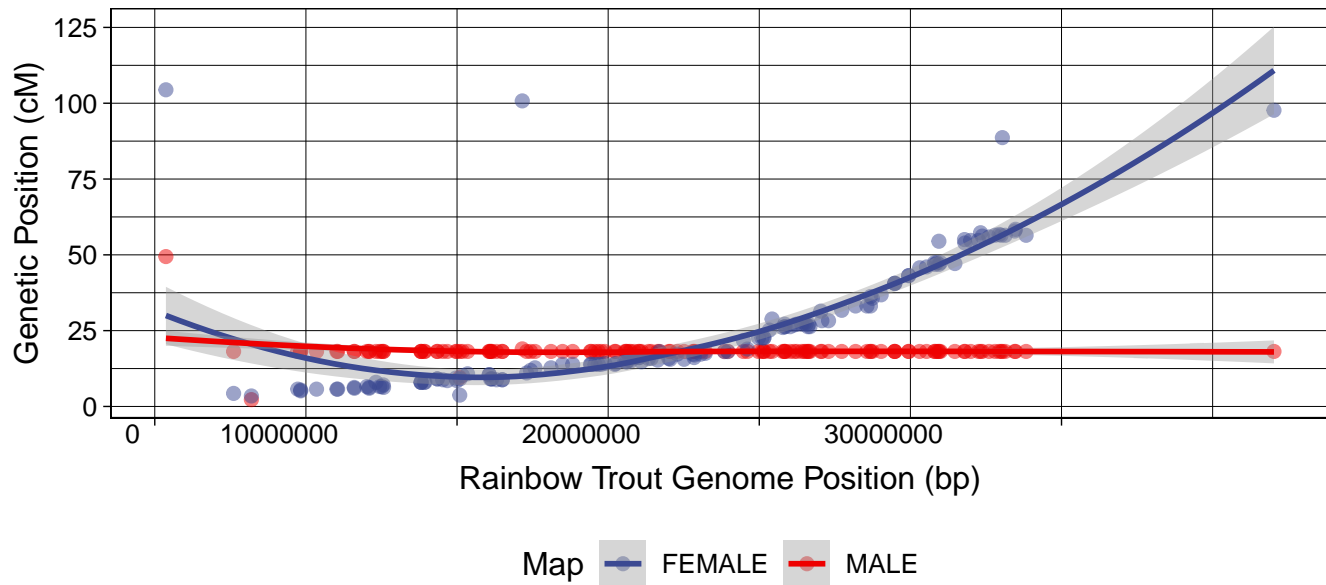

sna6 vs. omy21

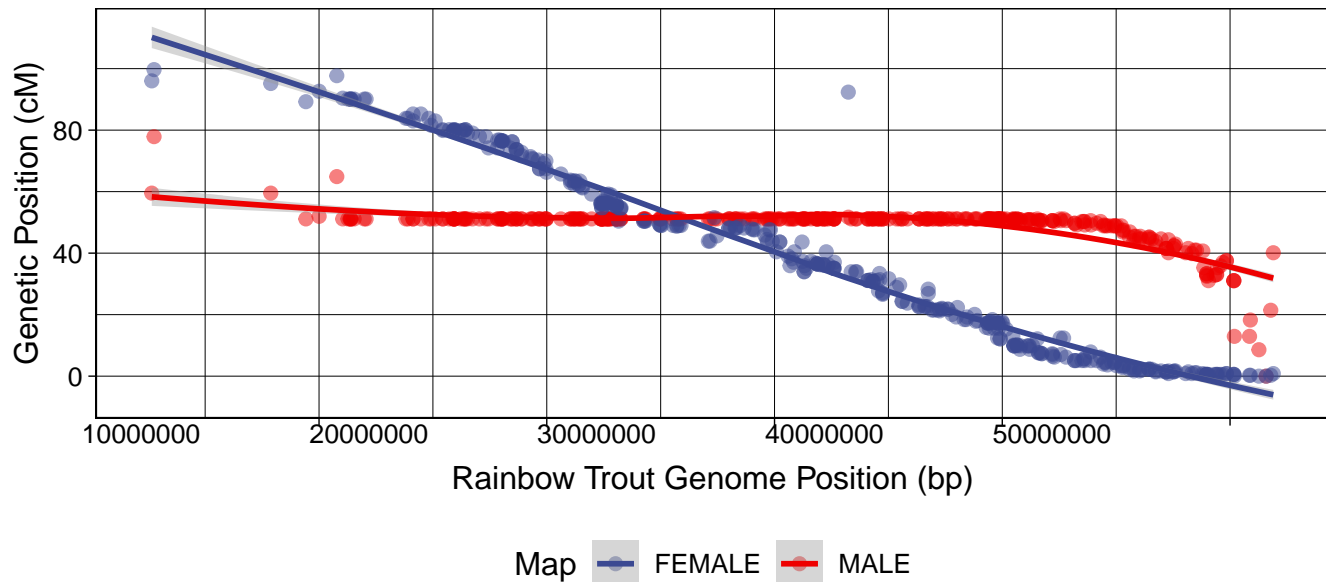

sna6 vs. omy15

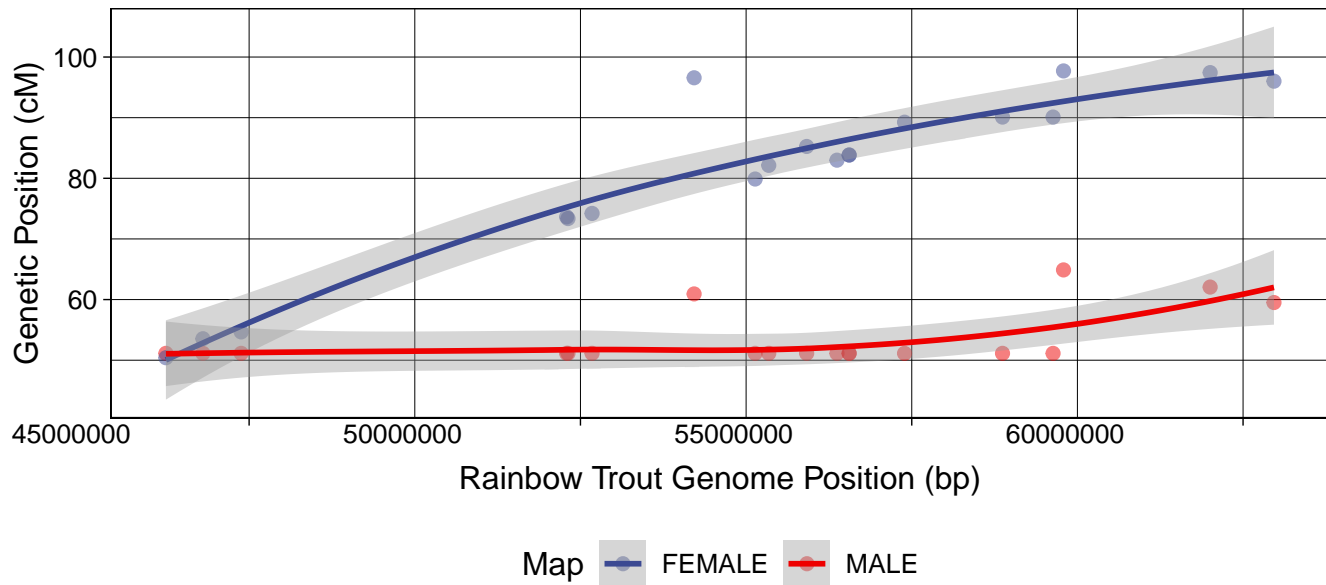

sna7 vs. omy15

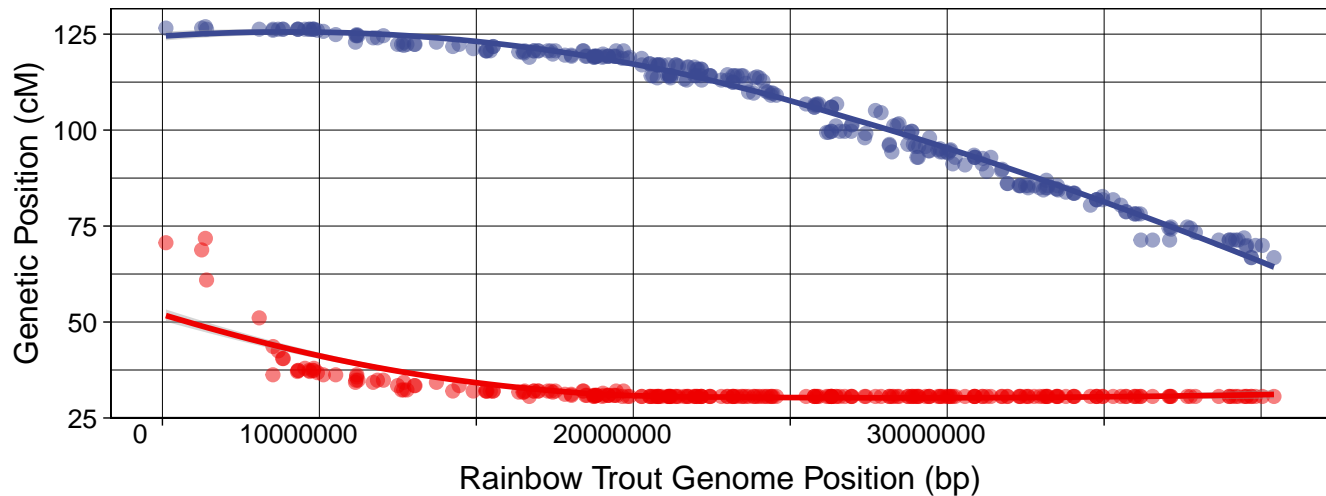

sna7 vs. omy18

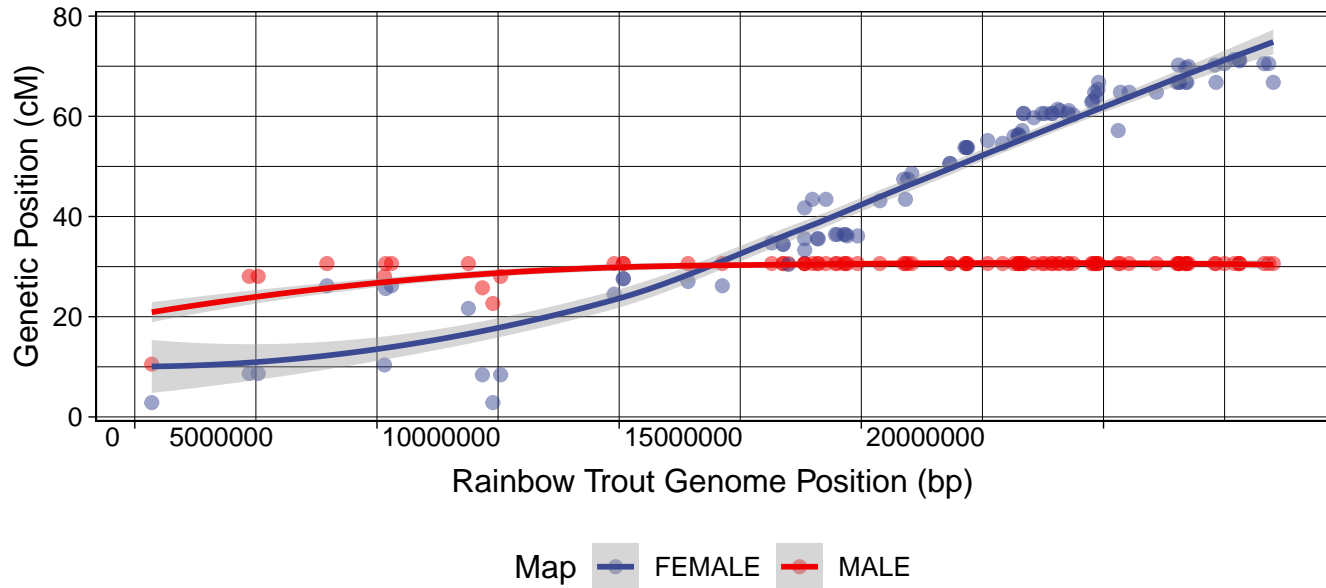



sna8 vs. omy4

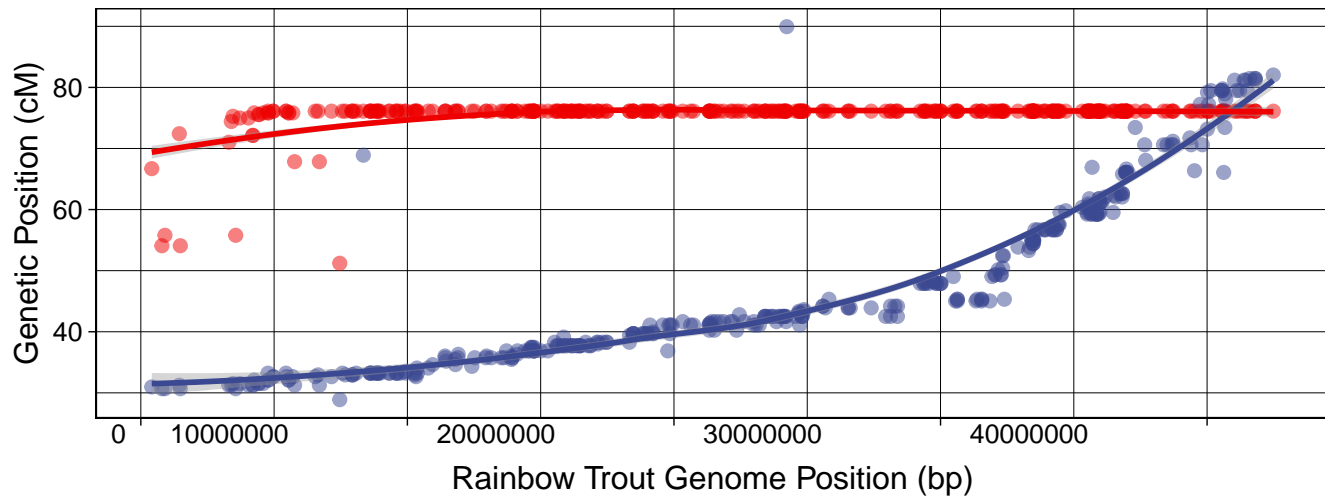

sna8 vs. omy10

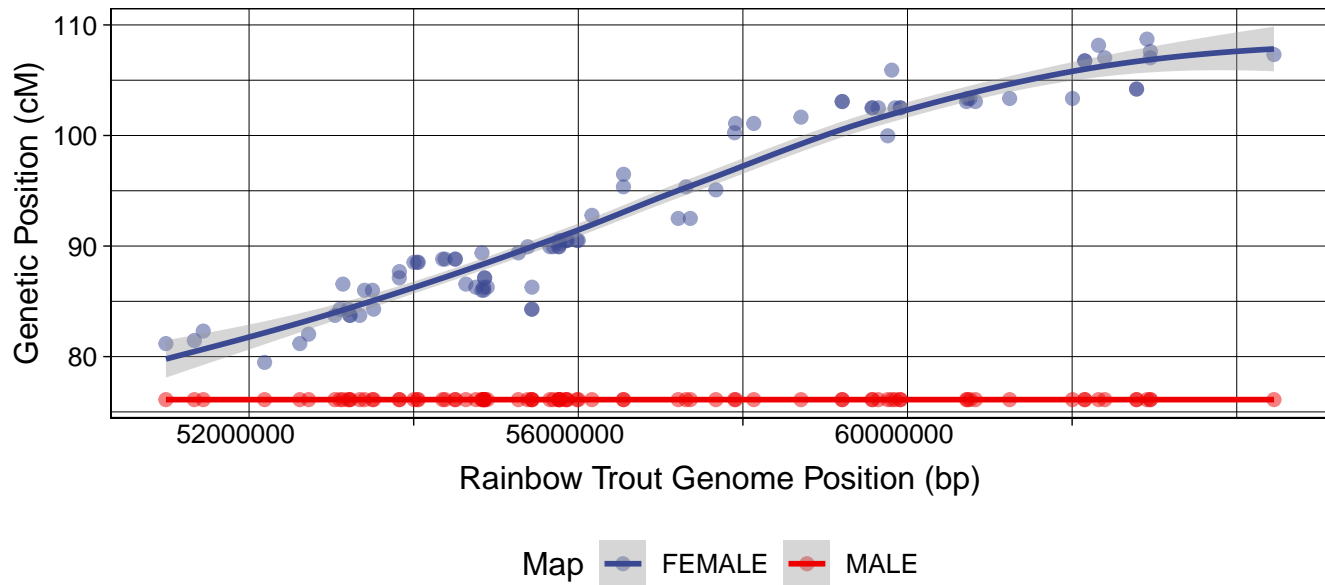

sna9 vs. omy1

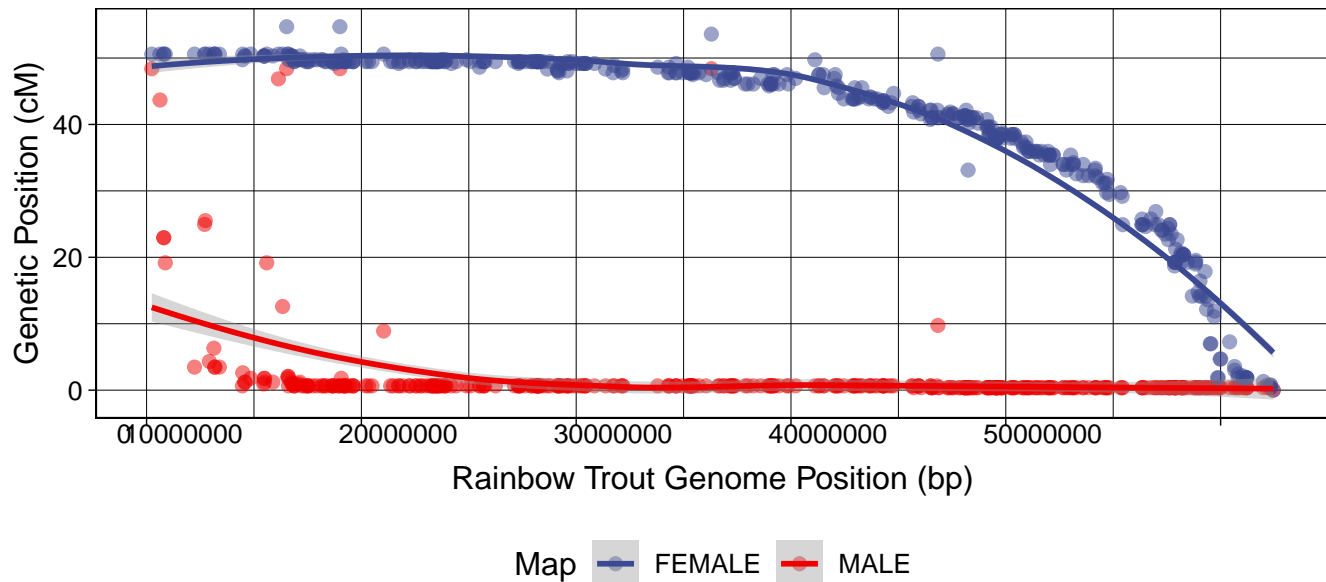

sna9 vs. omy5

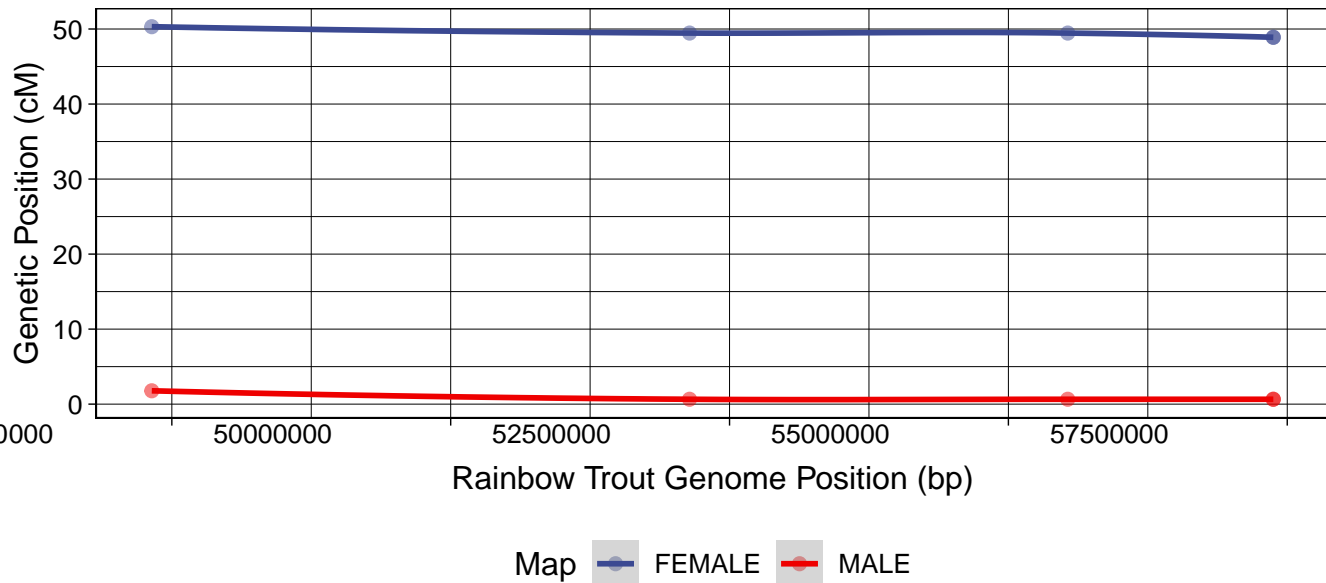

sna10 vs. omy5

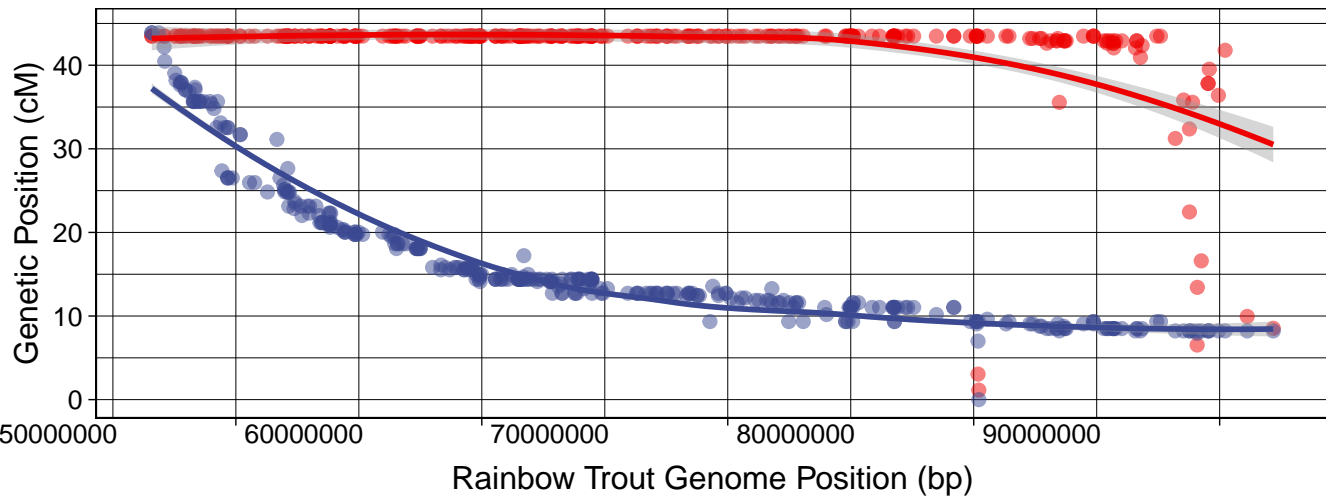

sna10 vs. omy4

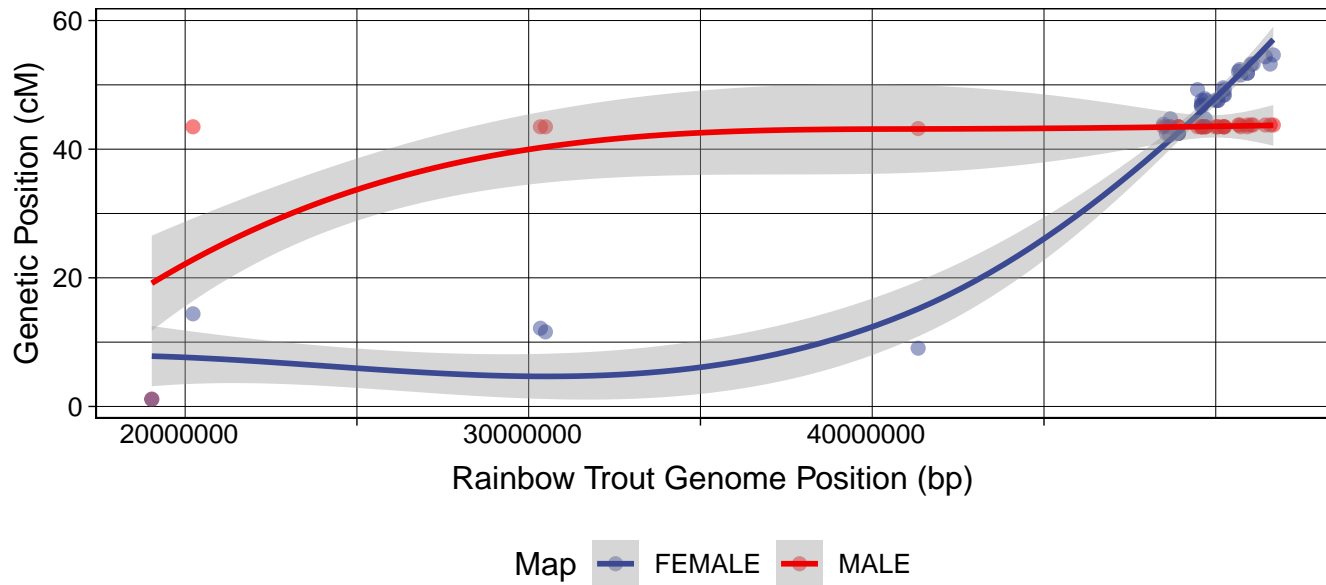

sna11 vs. omy8

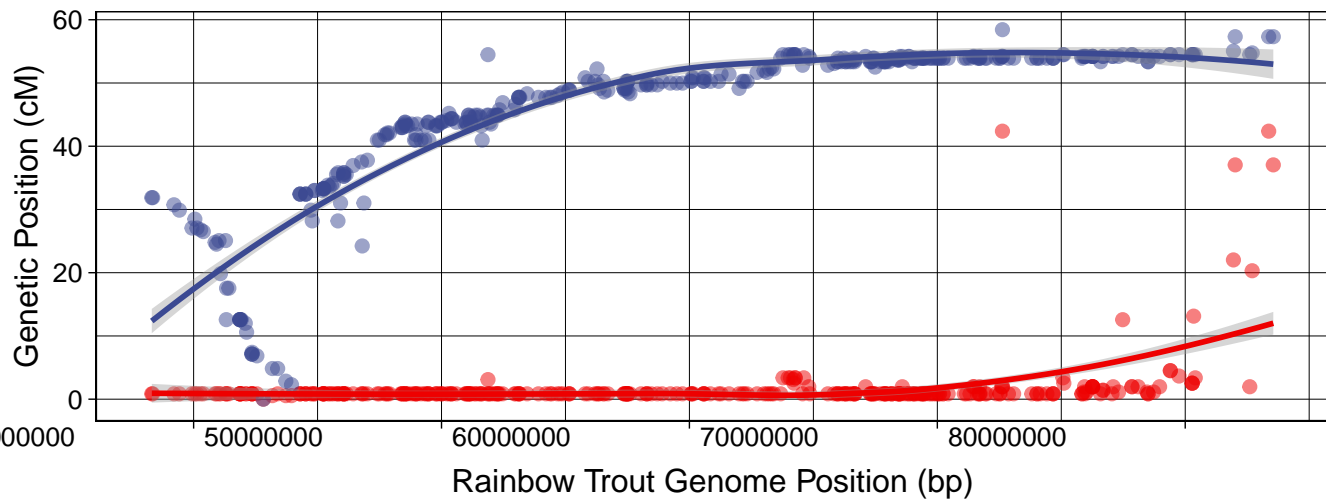

Map  FEMALE  MALE

sna11 vs. omy28

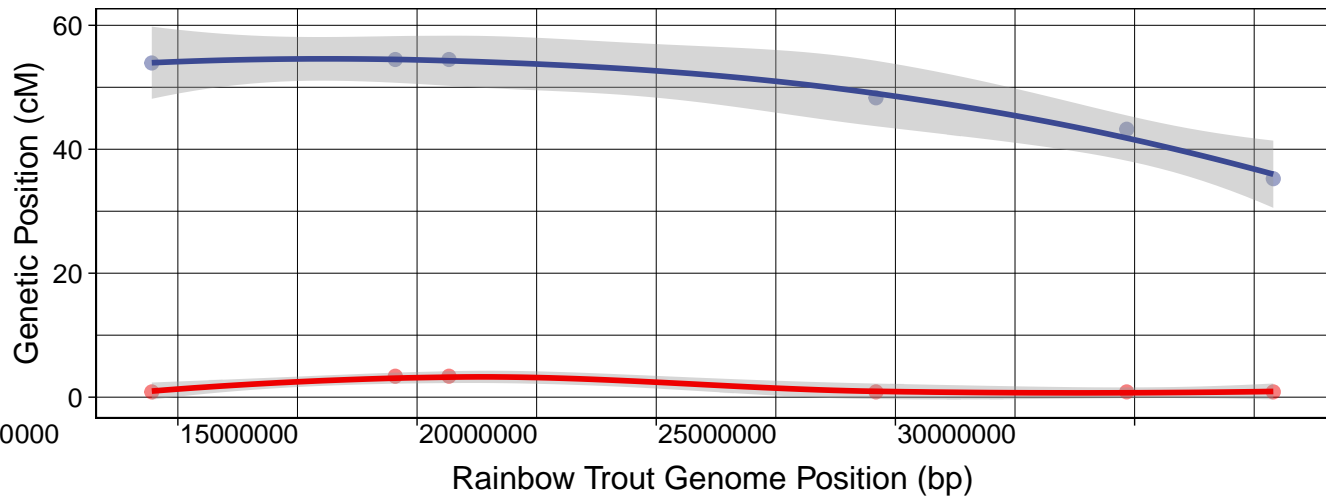

Map  FEMALE  MALE

sna12 vs. omy10

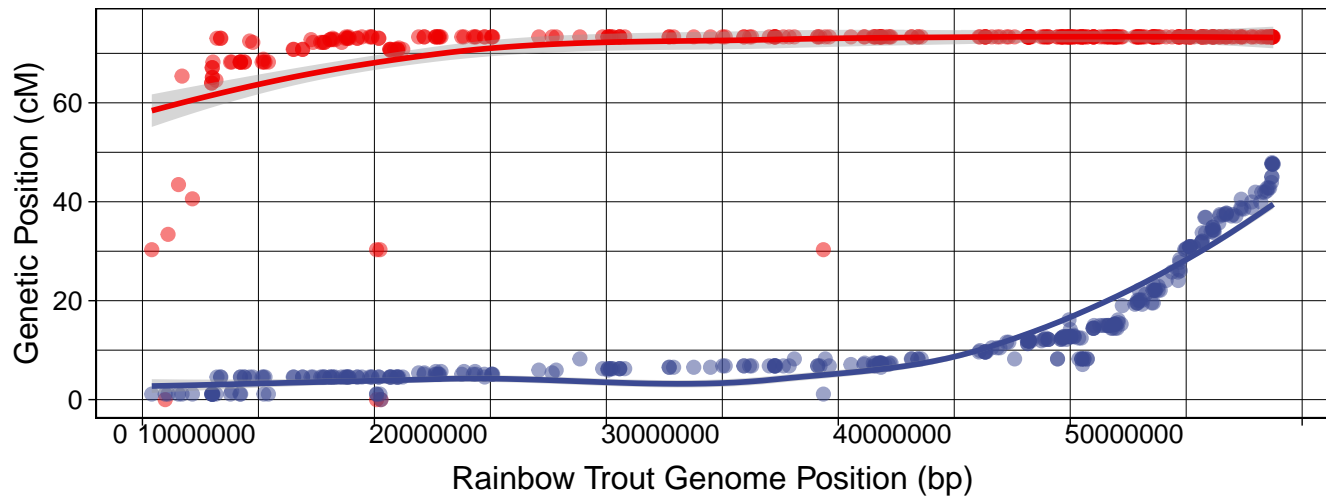

sna12 vs. omy15

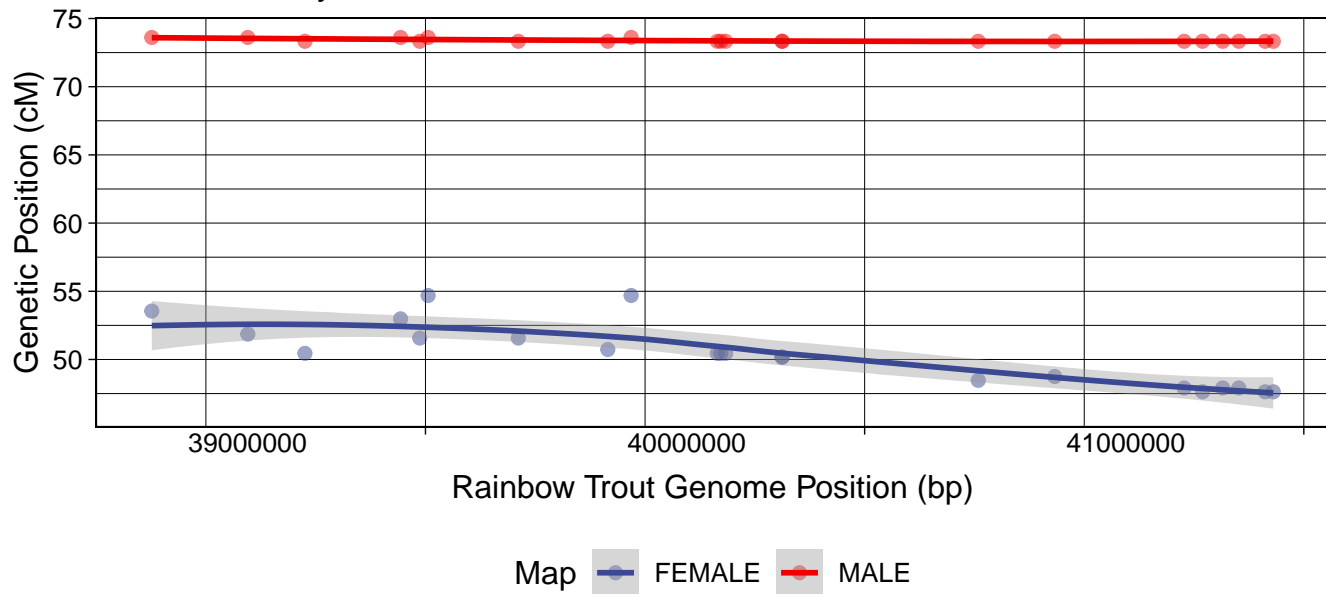

sna13 vs. omy3

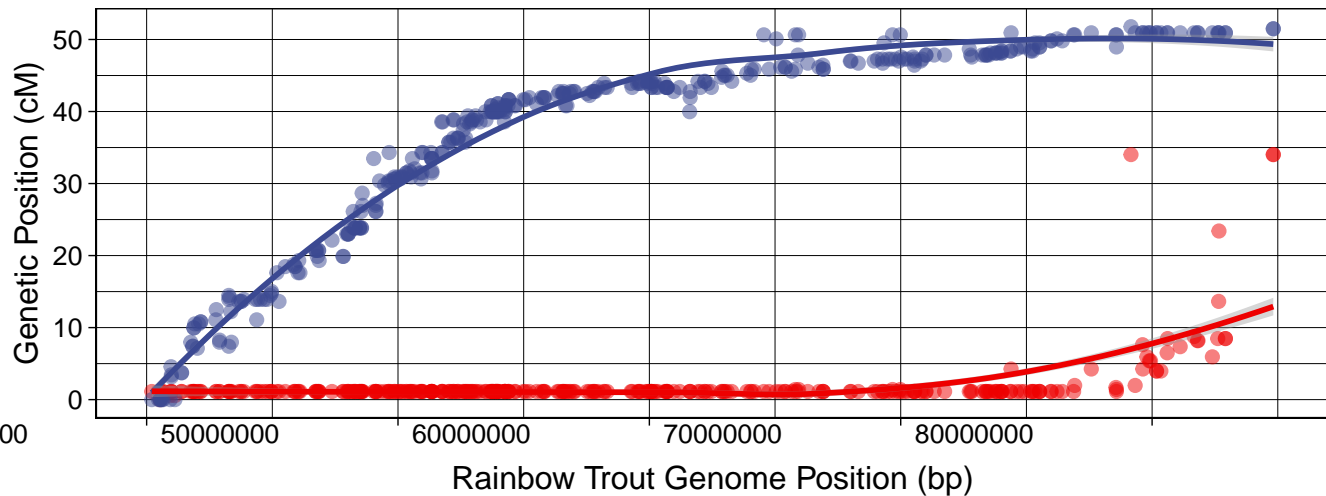

sna13 vs. omyUn3

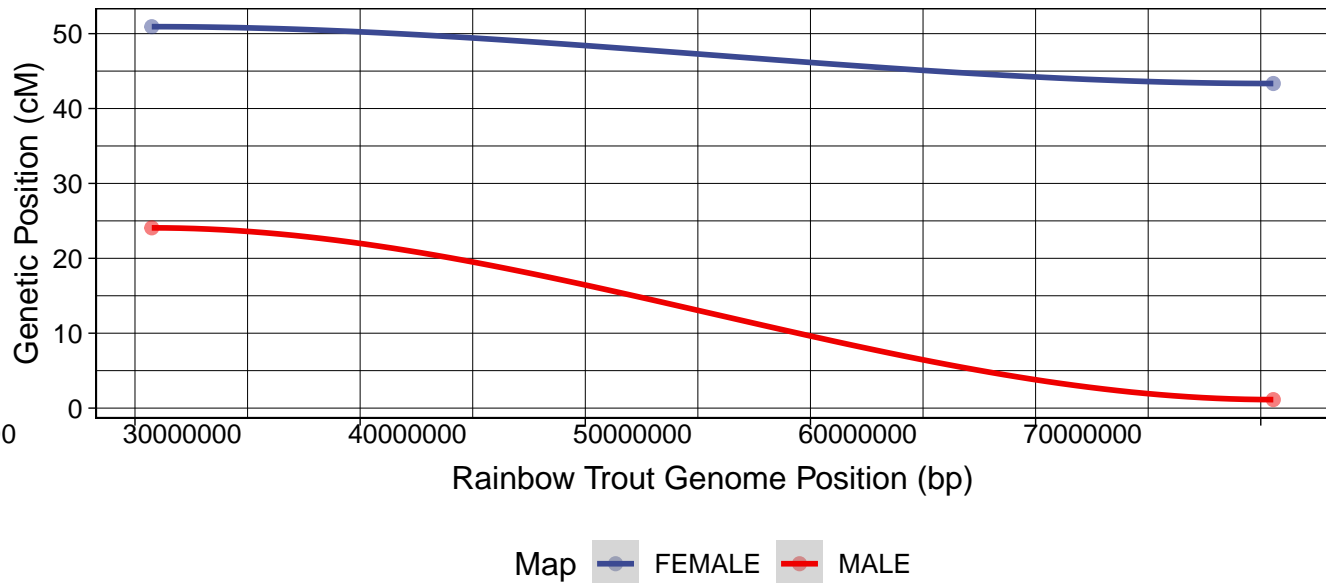

sna14 vs. omy9

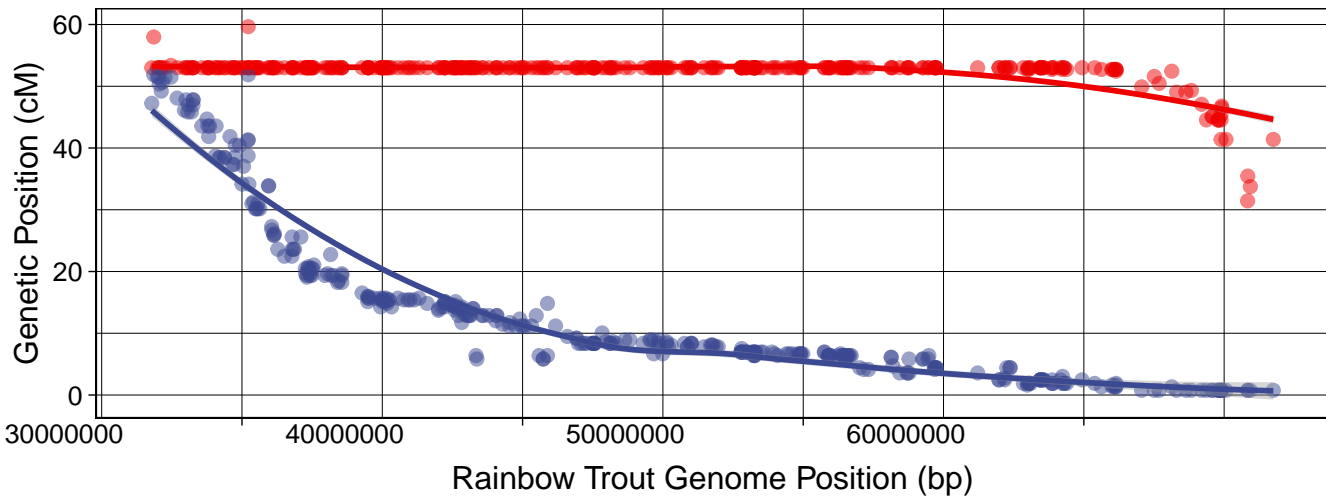

sna14 vs. omyUn3

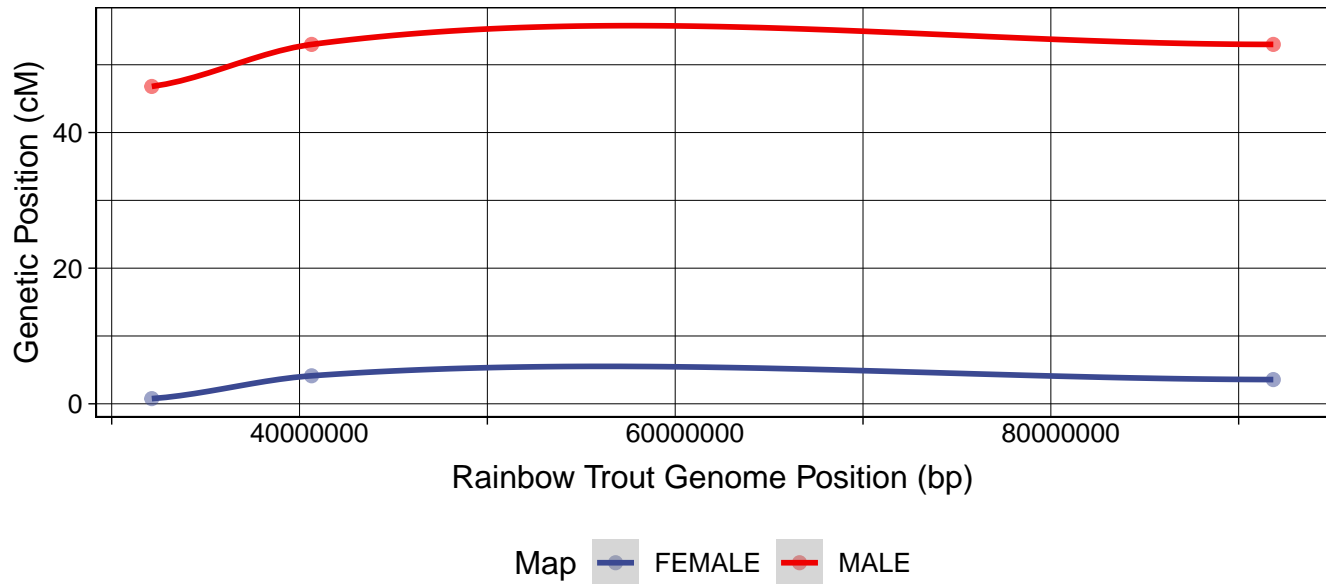

sna15 vs. omy19

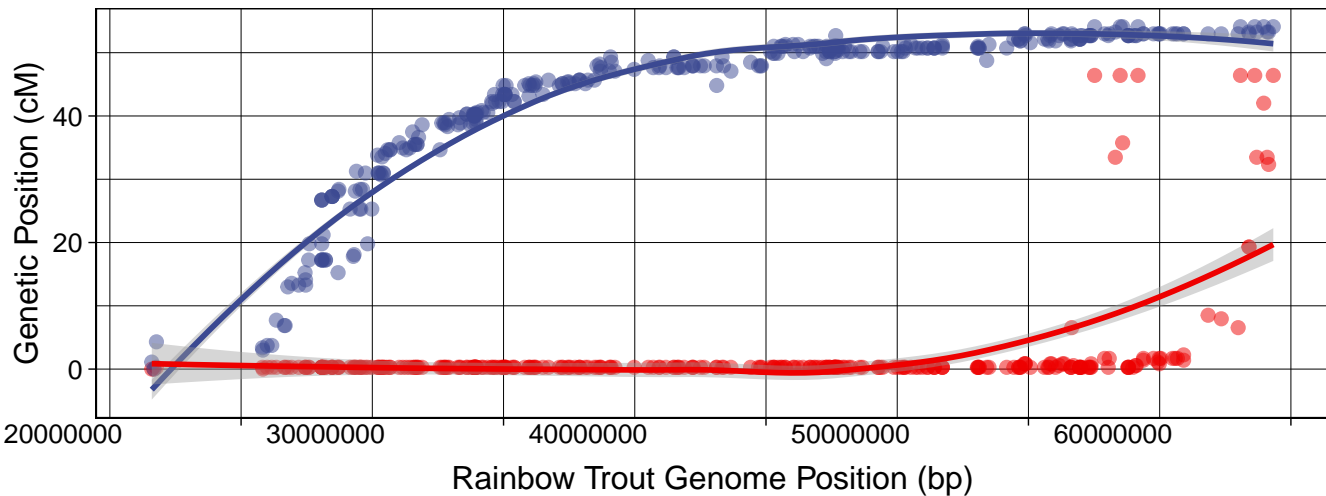

sna15 vs. omy25

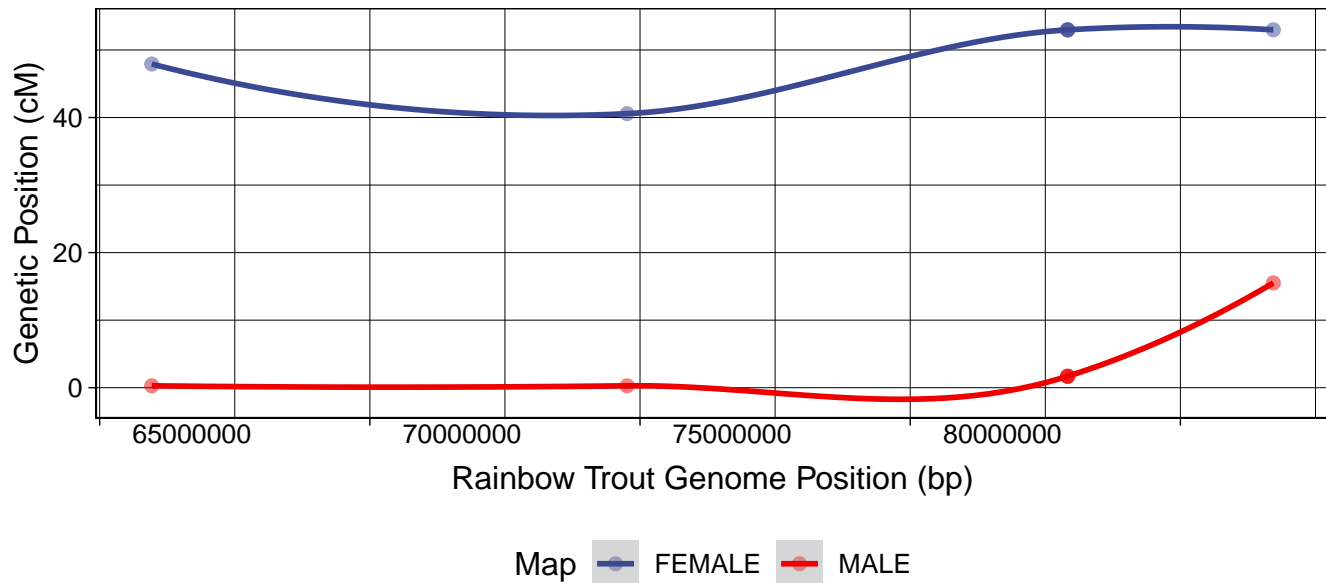



sna16 vs. omy16

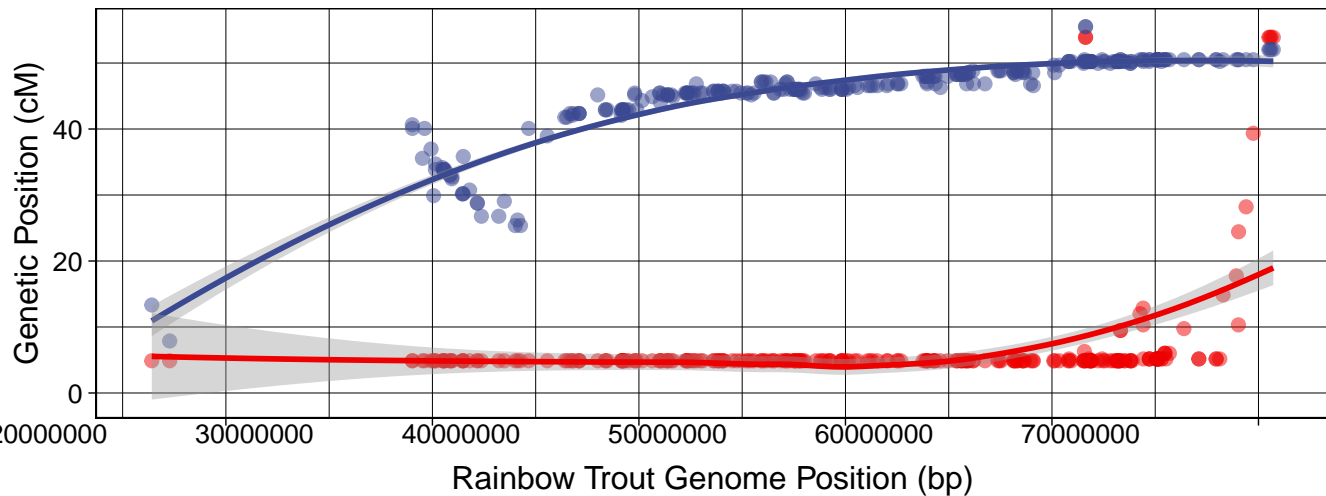

sna16 vs. omy20

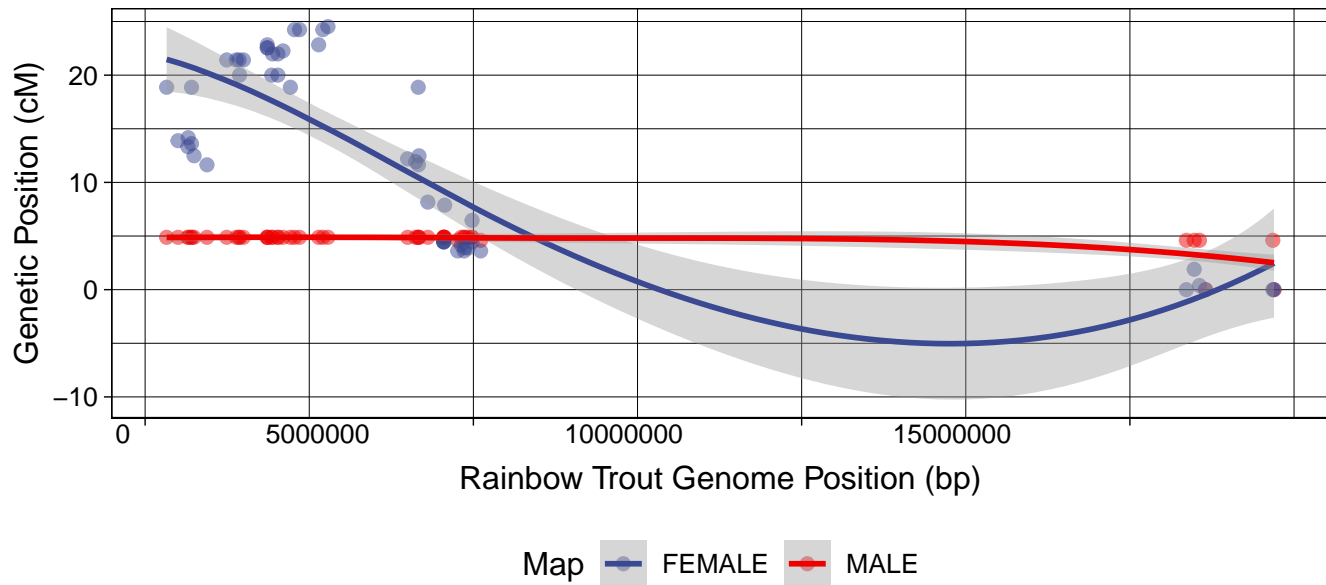

sna17 vs. omy25

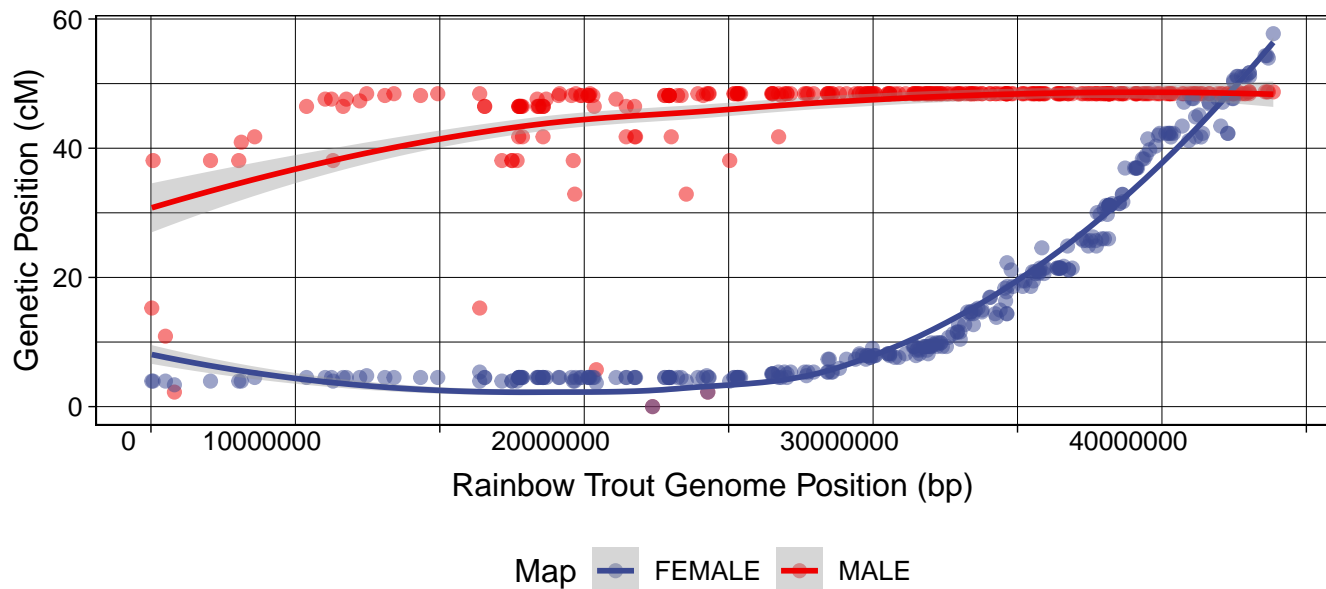

sna17 vs. omy14

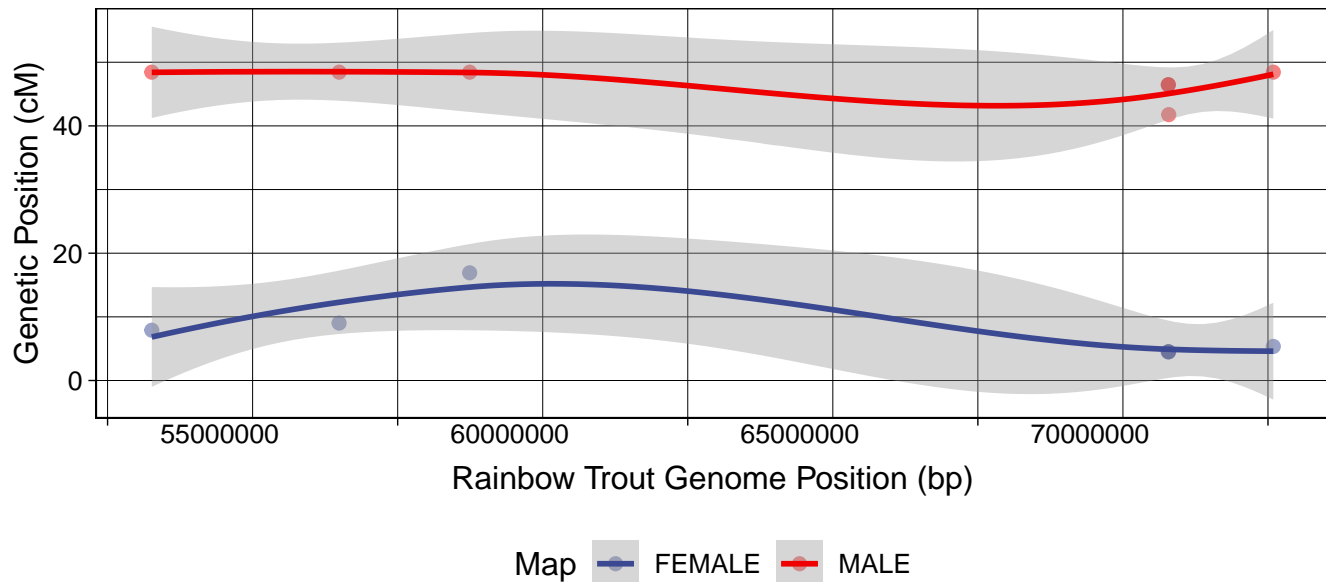

sna18 vs. omy11

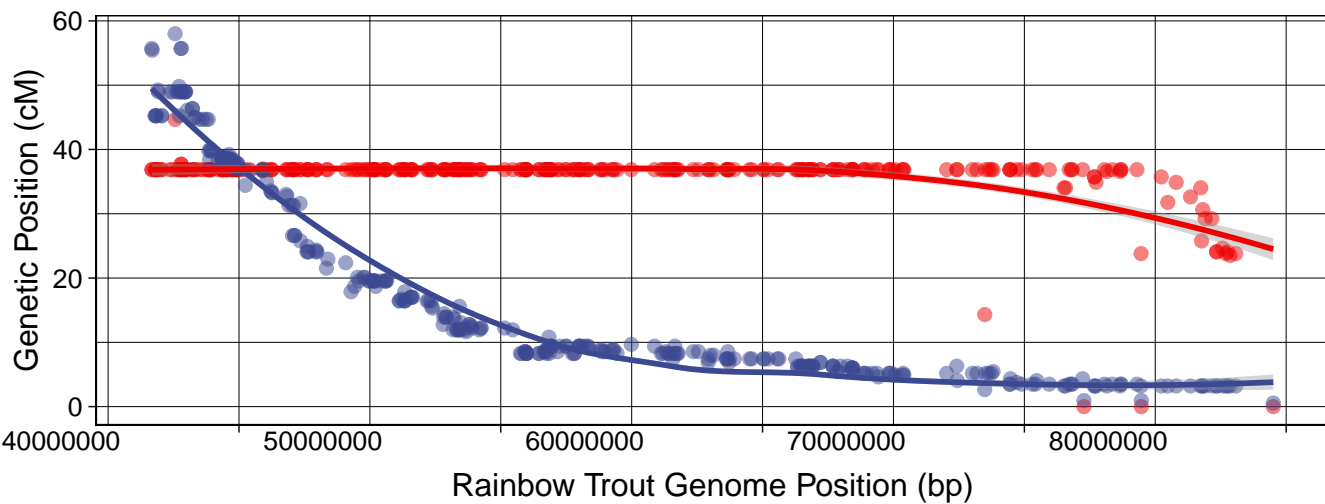

sna18 vs. omy6

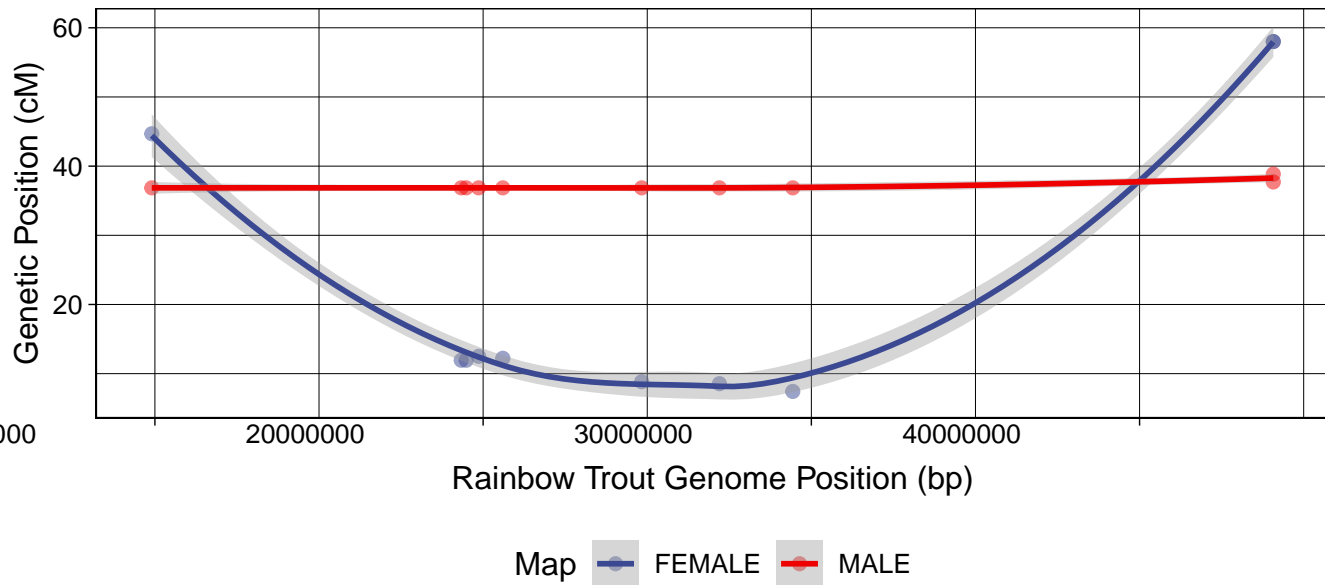

sna19 vs. omy22

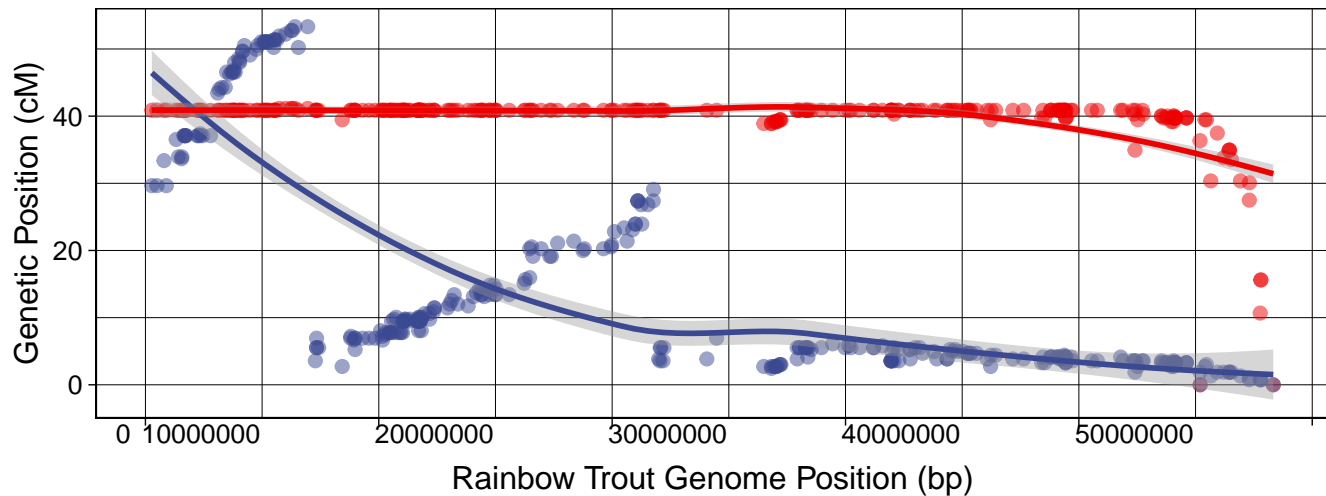

sna19 vs. omyUn2

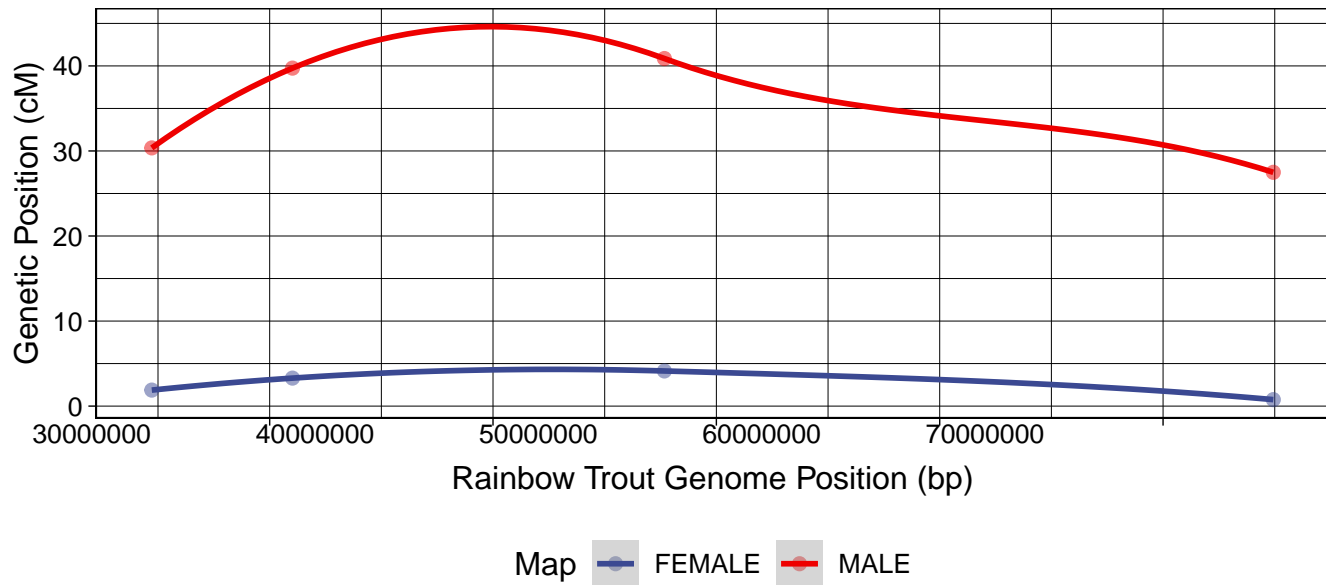

sna20 vs. omy7

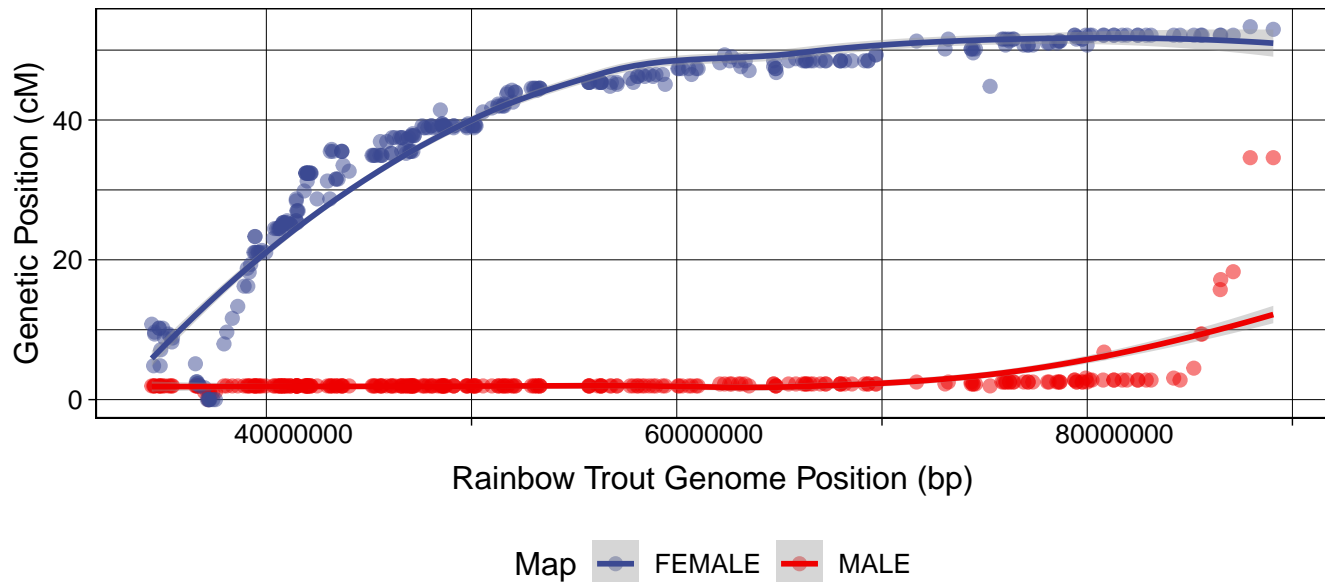

sna20 vs. omy6

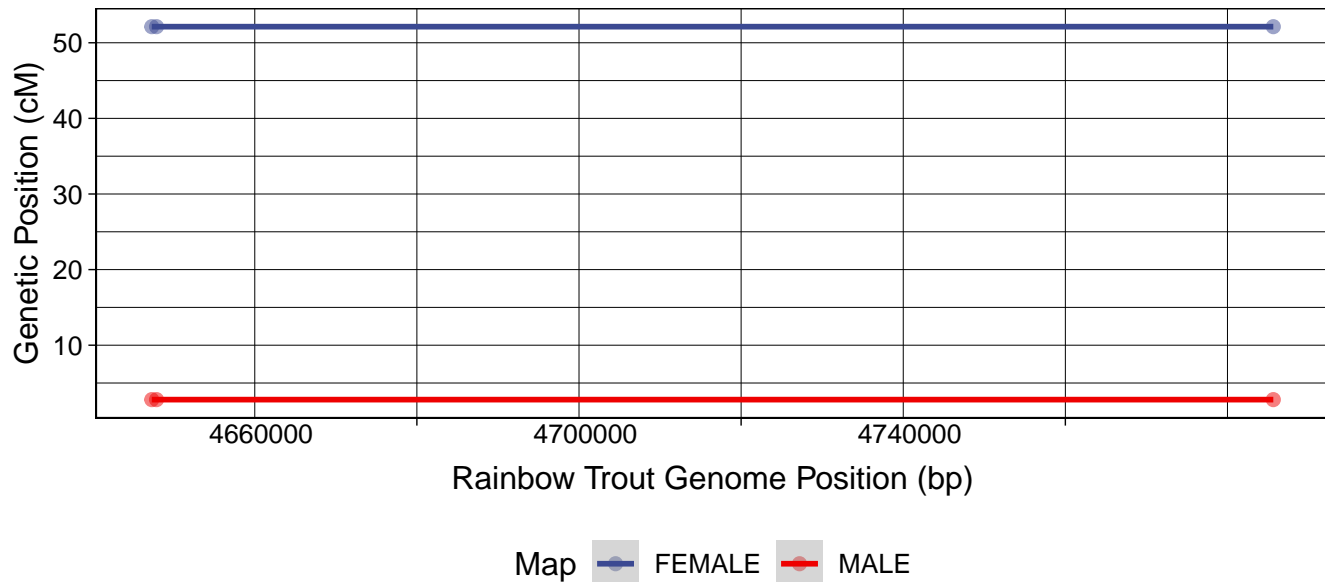

sna21 vs. omy2

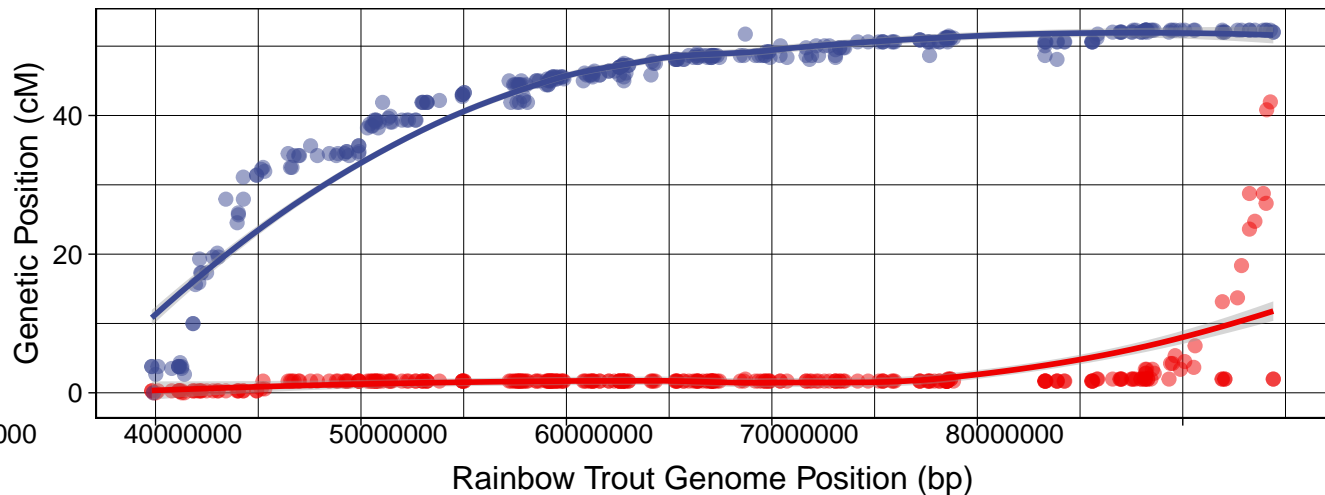

sna21 vs. omy1

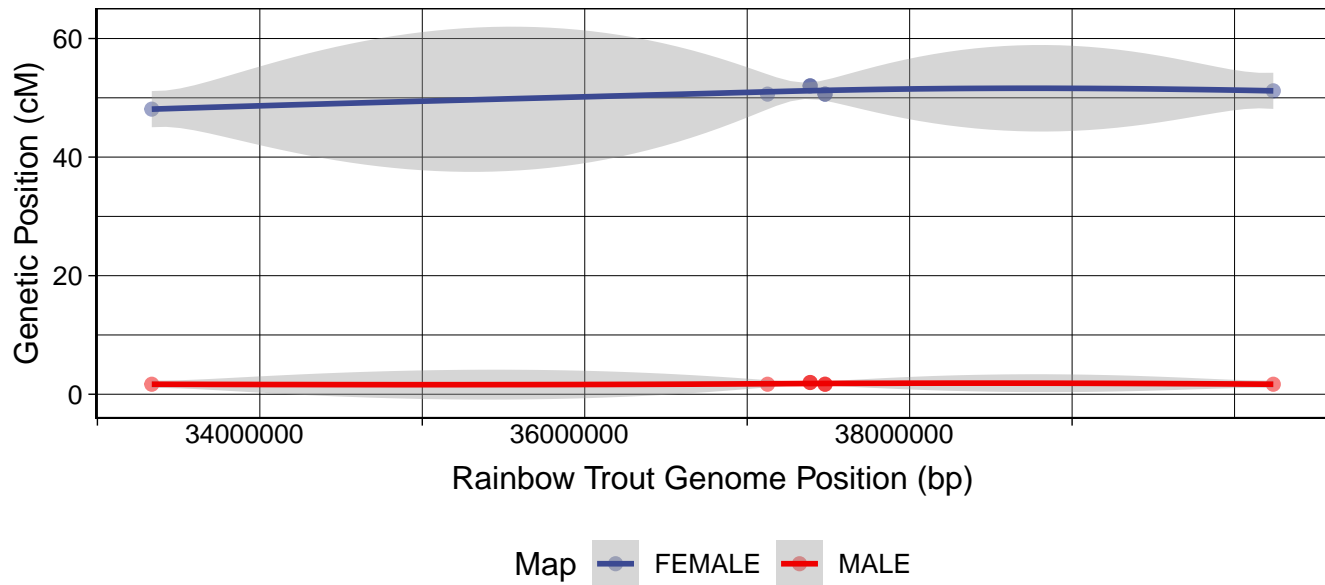

sna22 vs. omy1

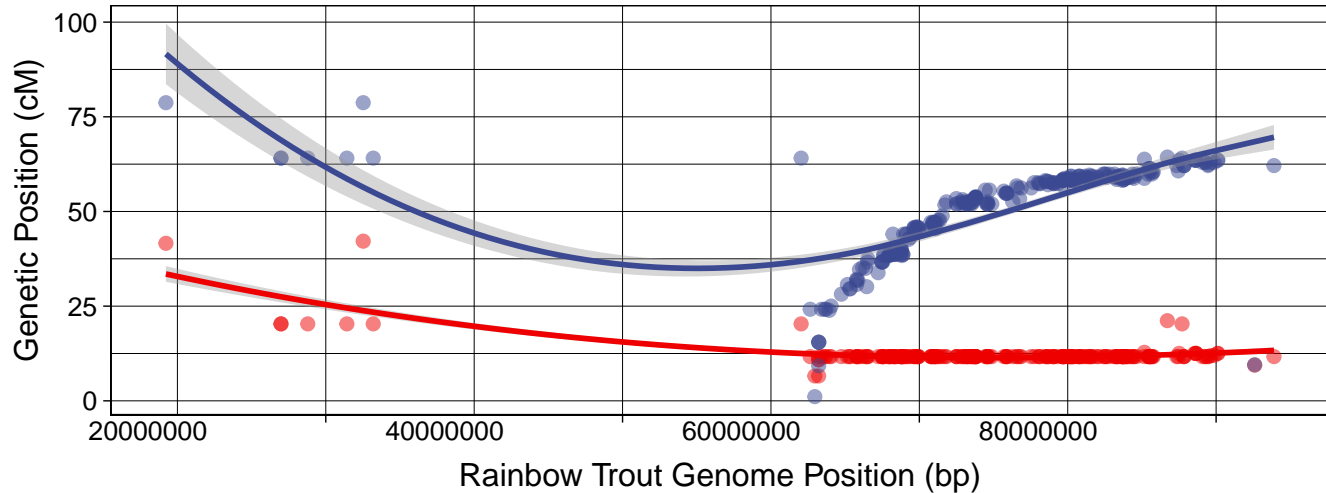

sna22 vs. omy23

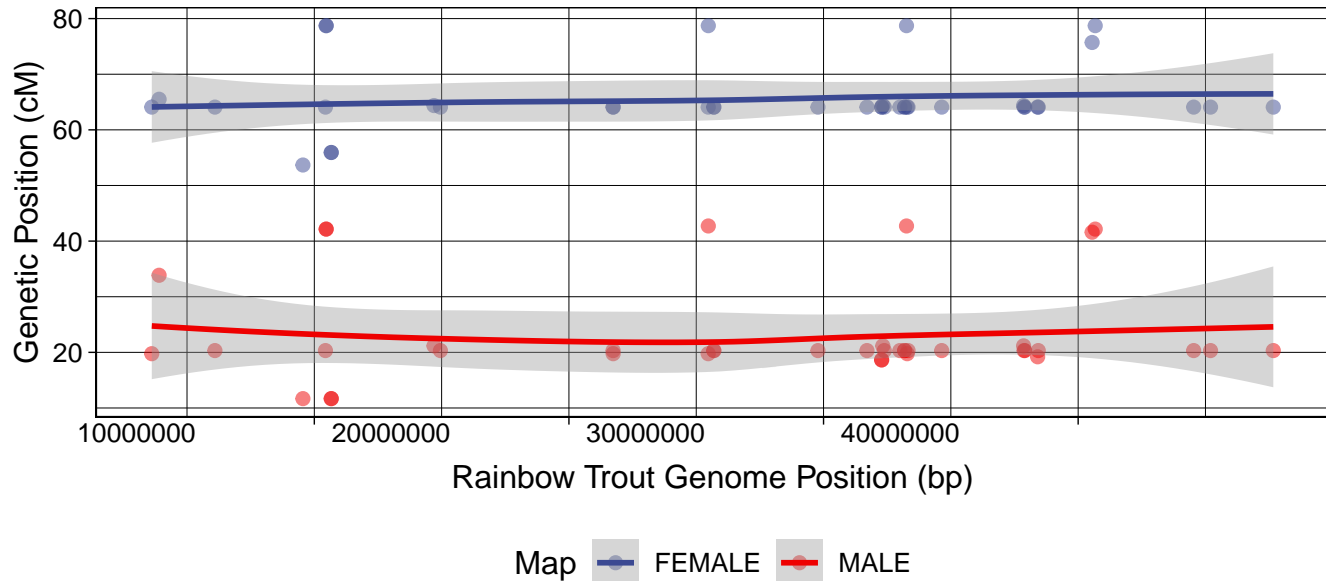

sna23 vs. omy27

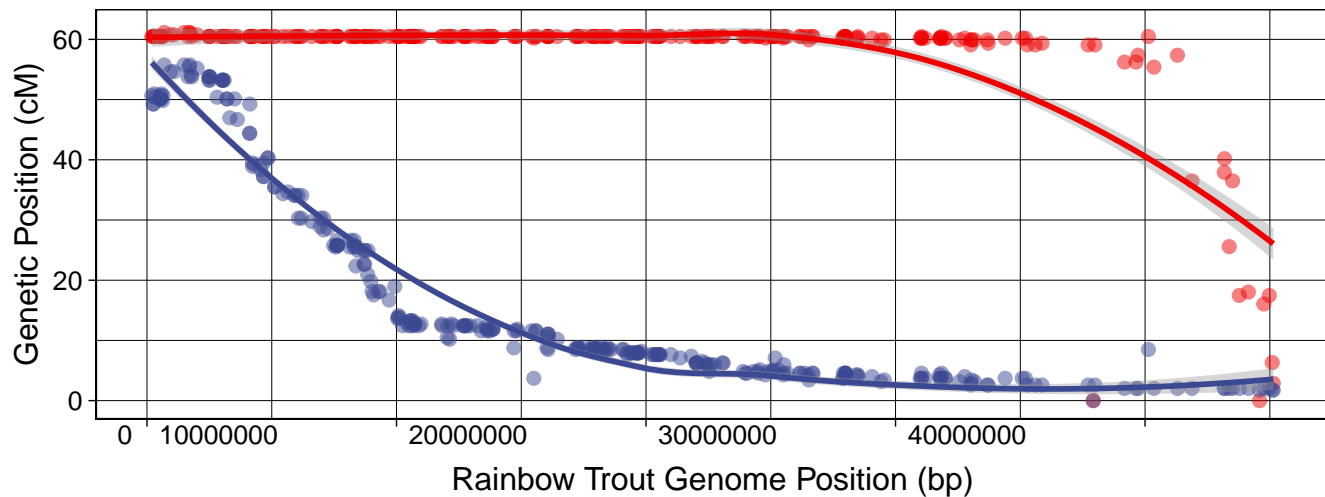

sna23 vs. omy24

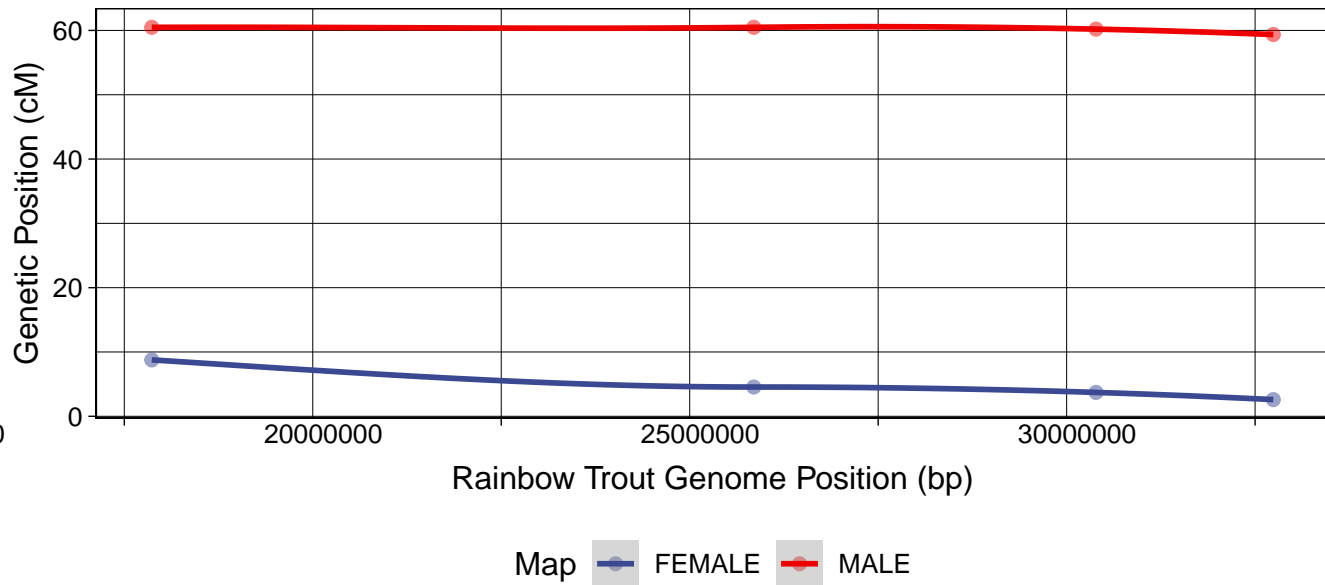



sna24 vs. omy4

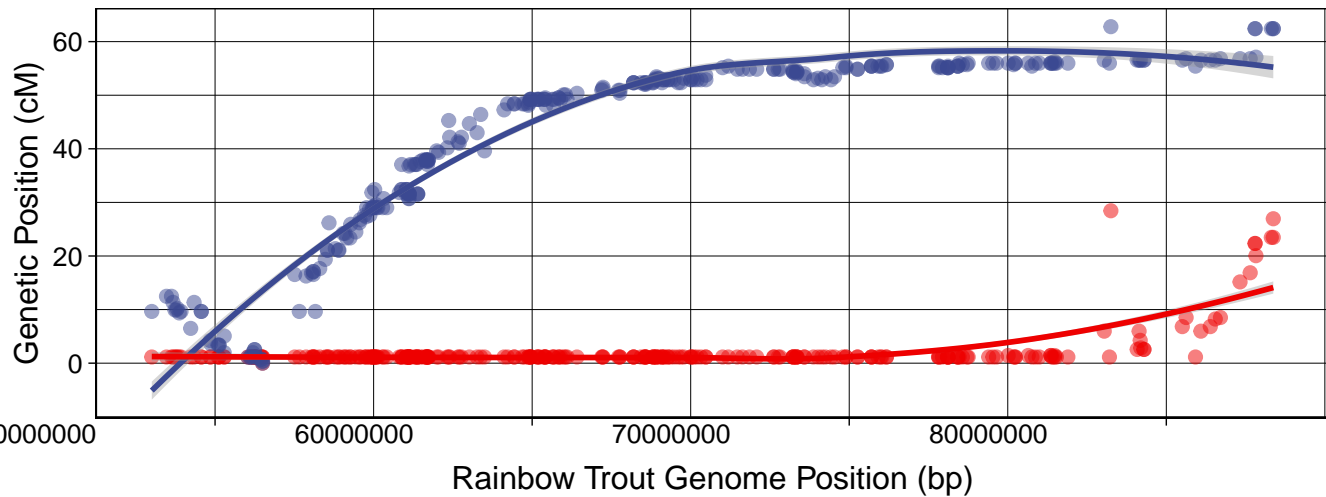

sna24 vs. omy8

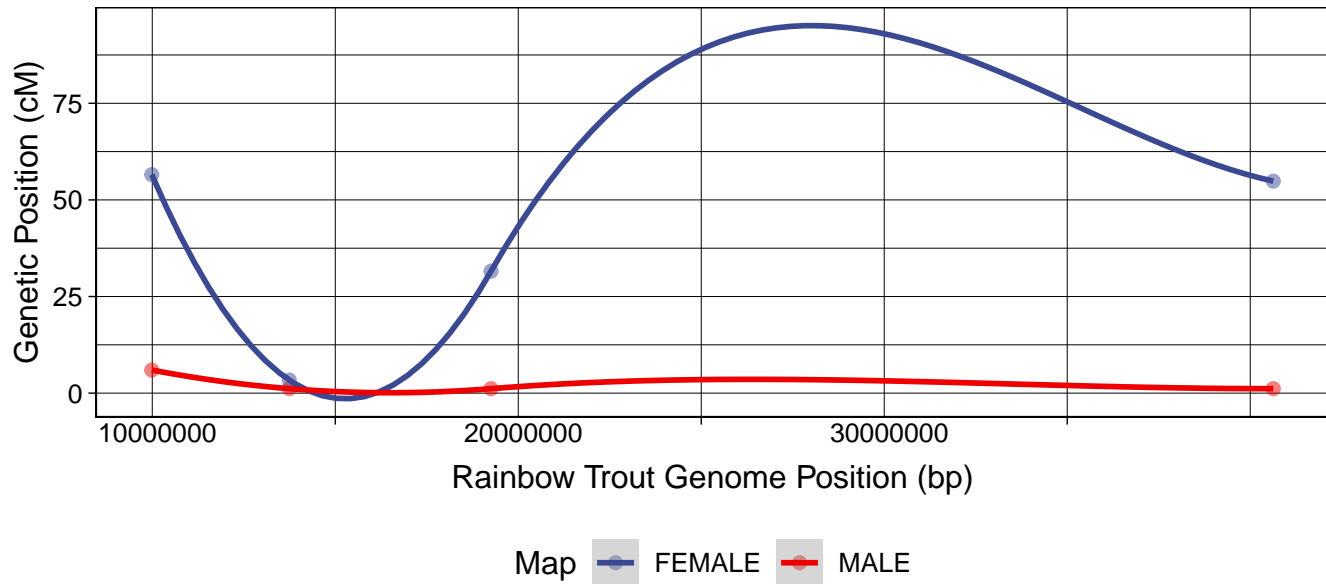

sna25 vs. omy28

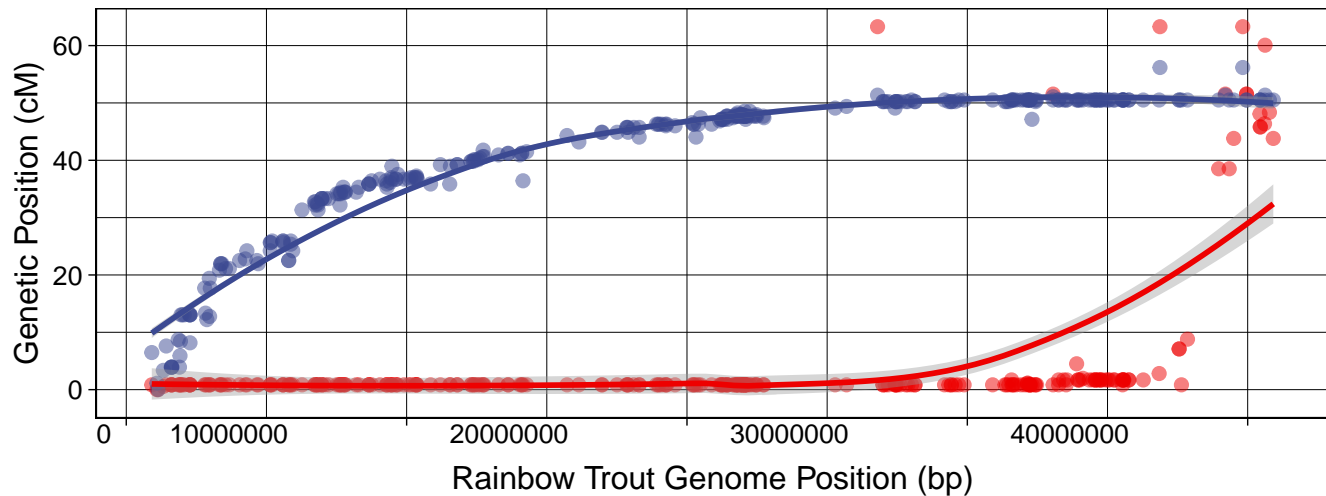

sna25 vs. omy16

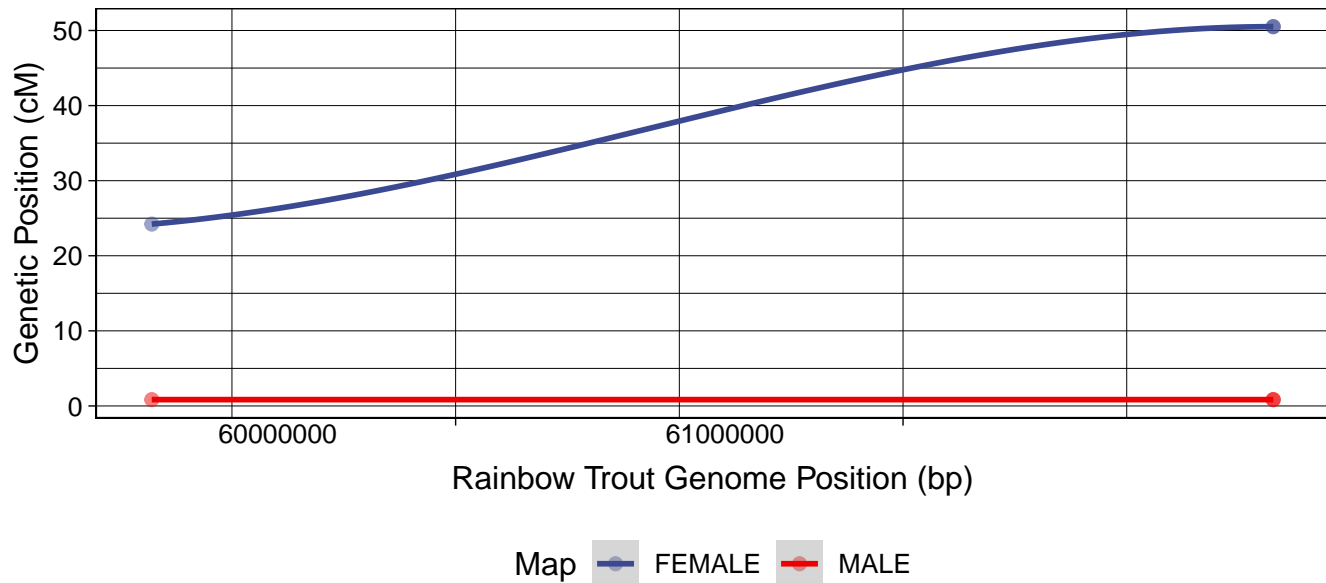

sna26 vs. omy29

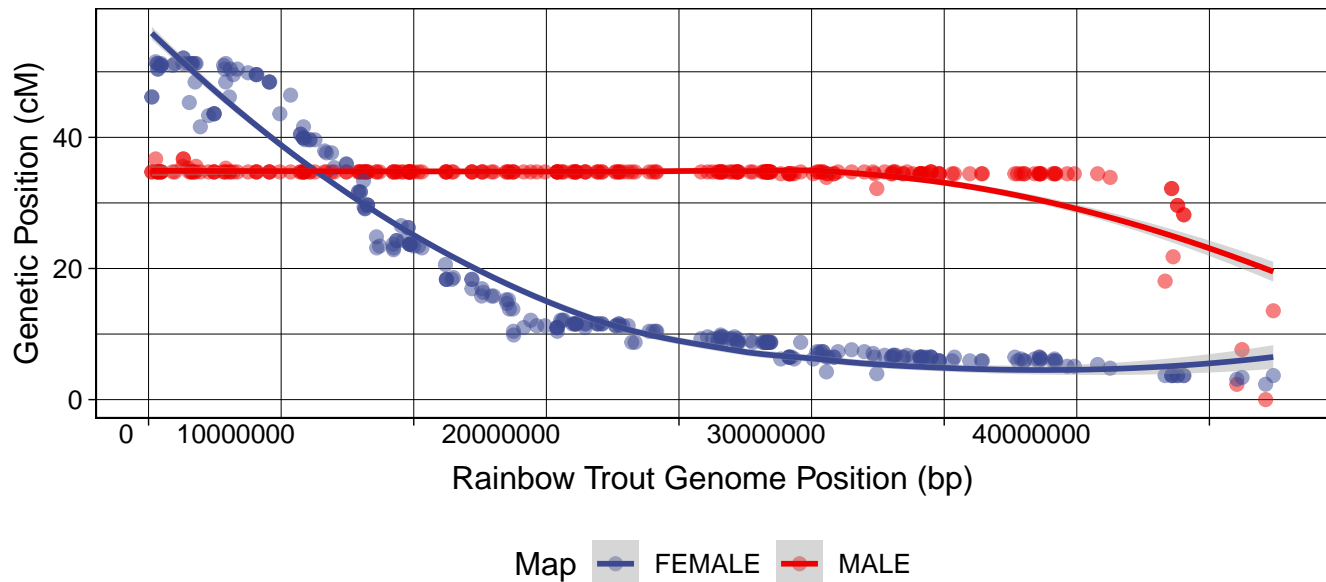

sna26 vs. omyUn3

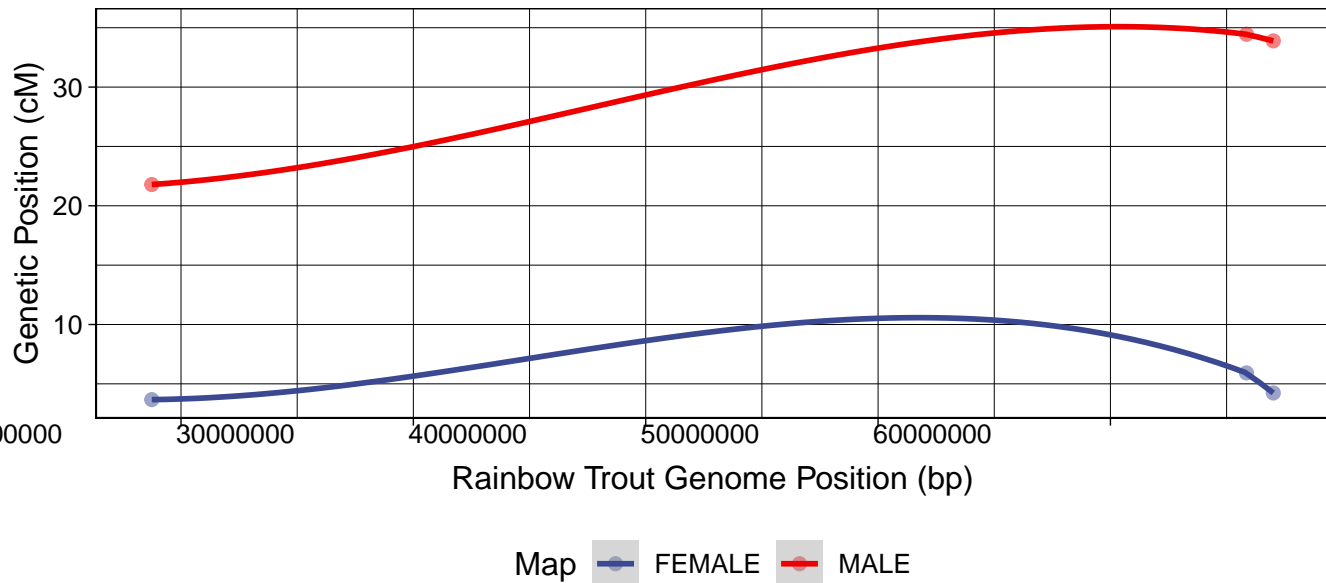

sna27 vs. omy18

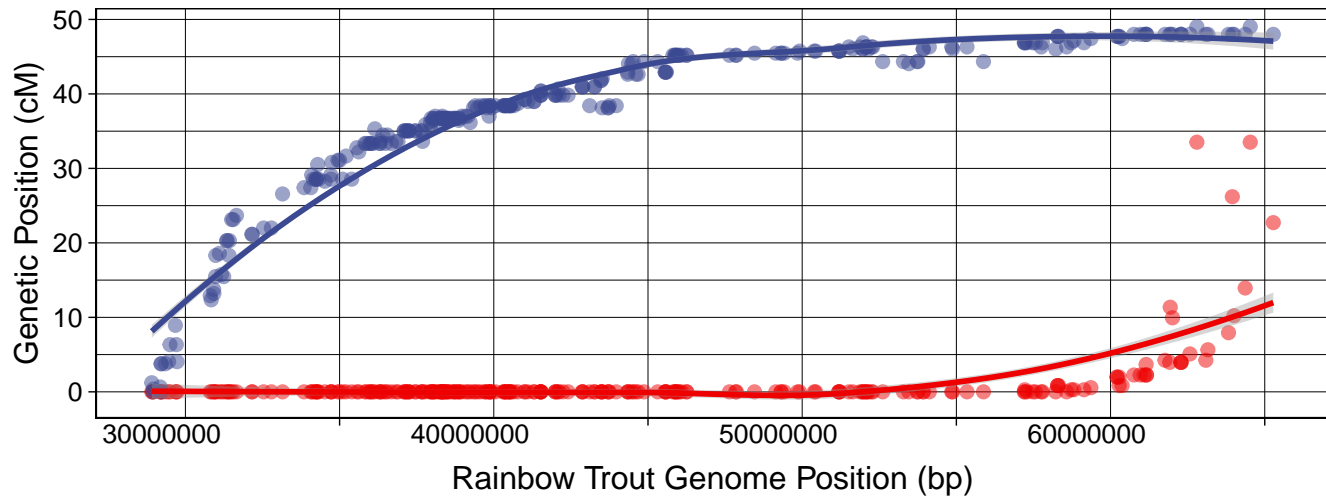

sna27 vs. omyUn1

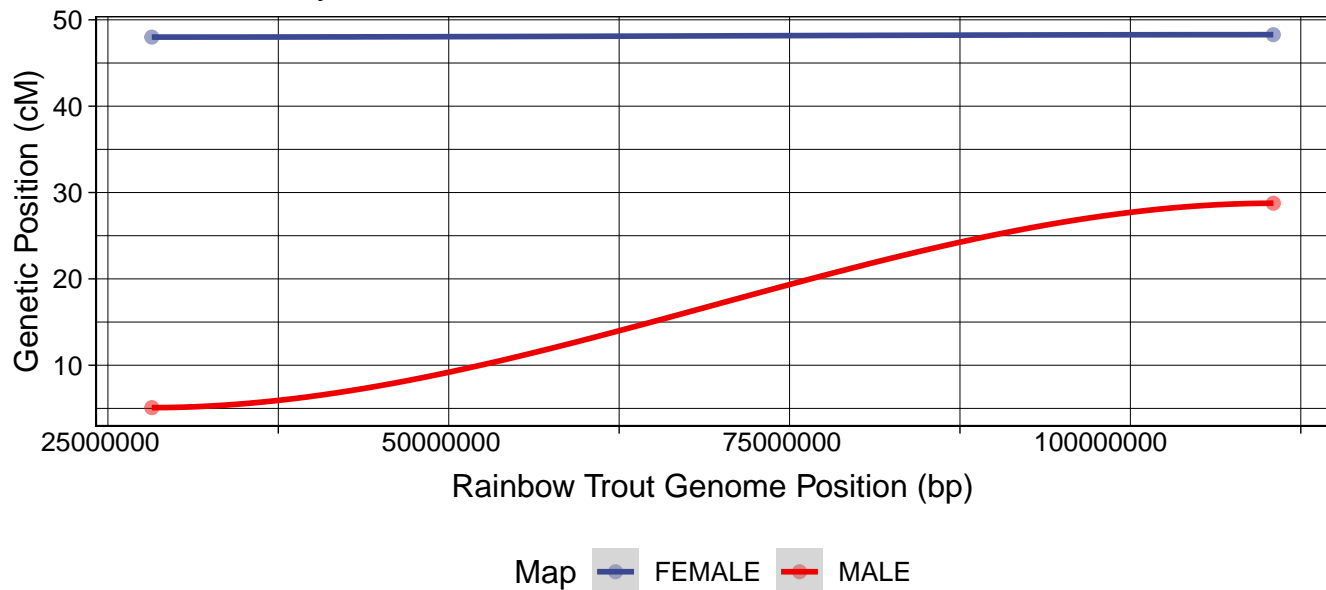

sna28 vs. omy25

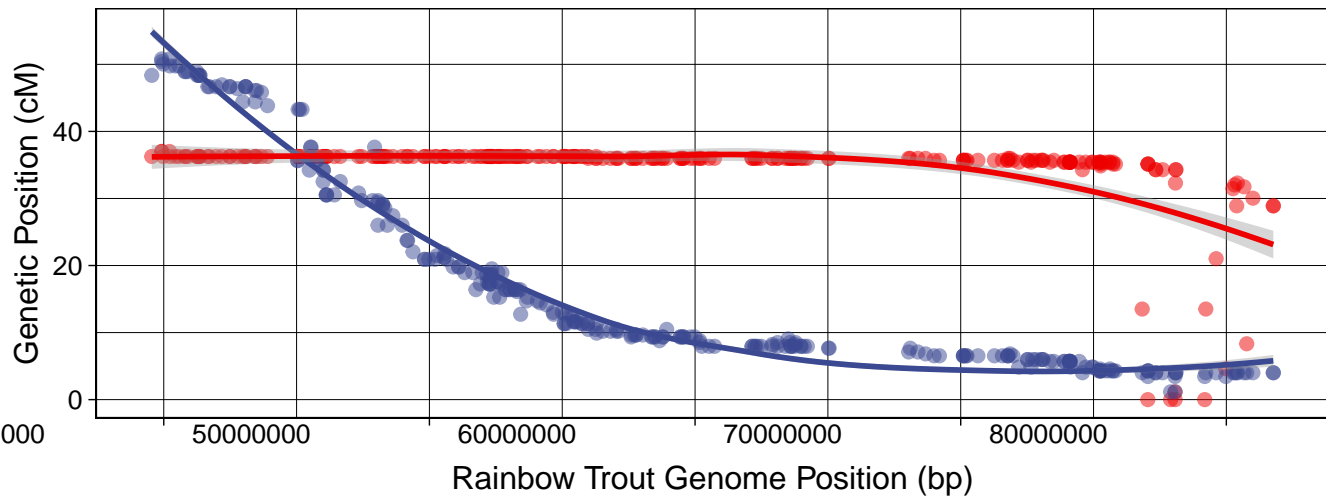

sna28 vs. omy19

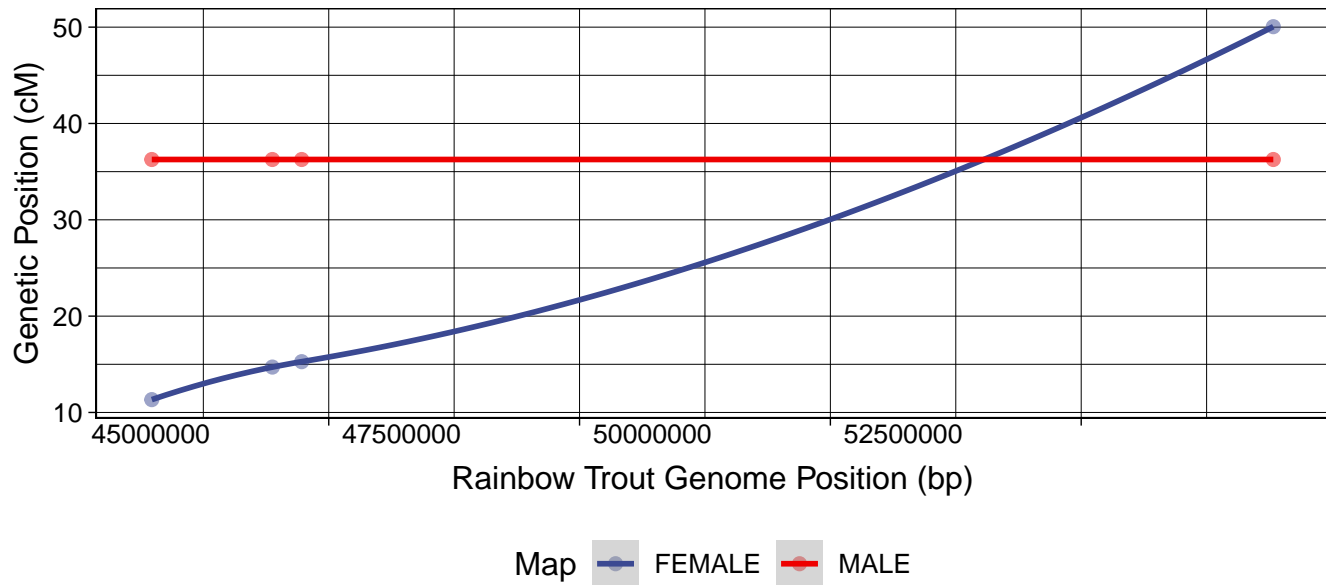

sna29 vs. omy8

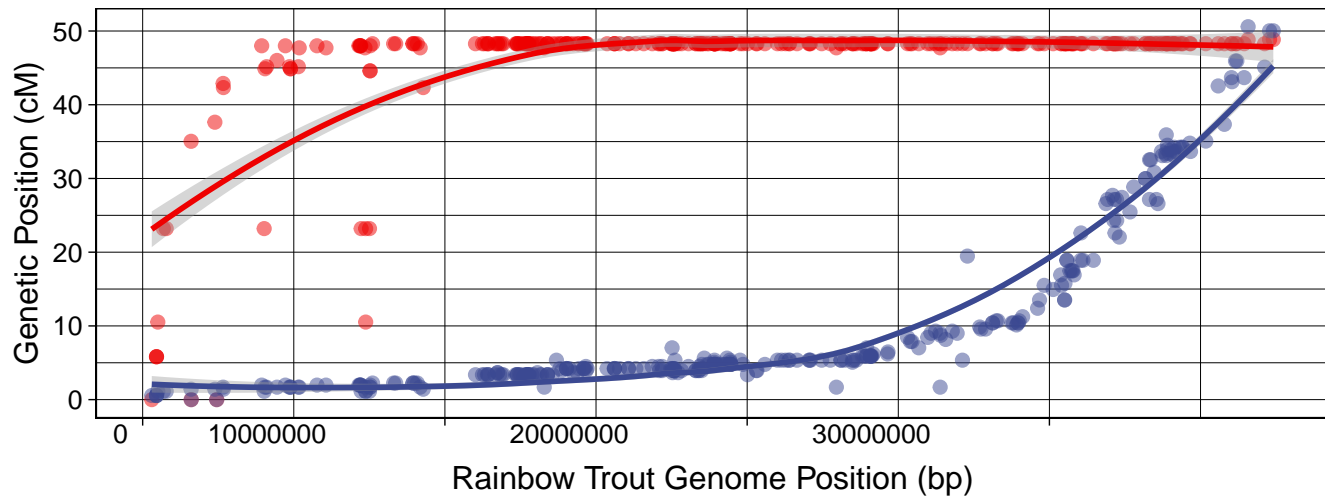

sna29 vs. omyUn4

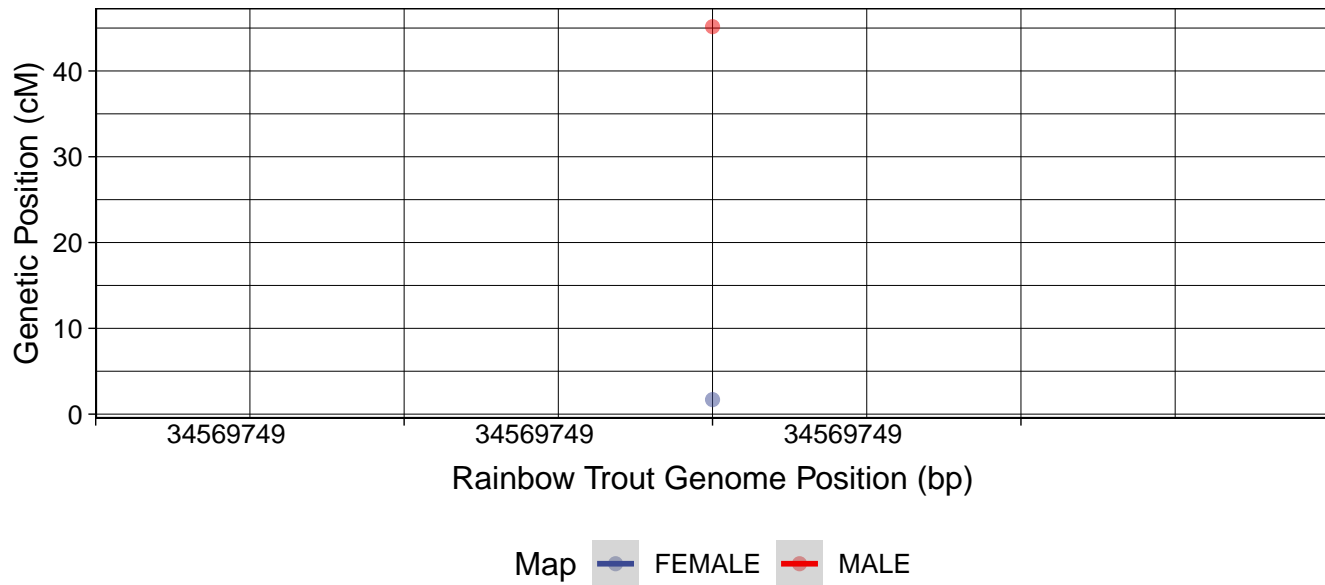

sna30 vs. omy26

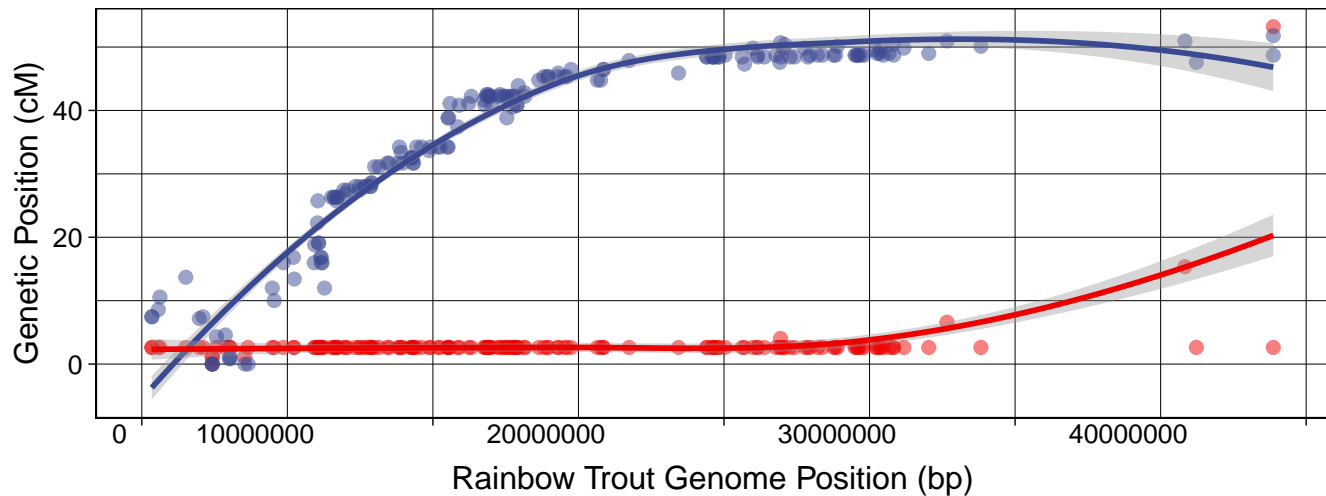

sna30 vs. omy6

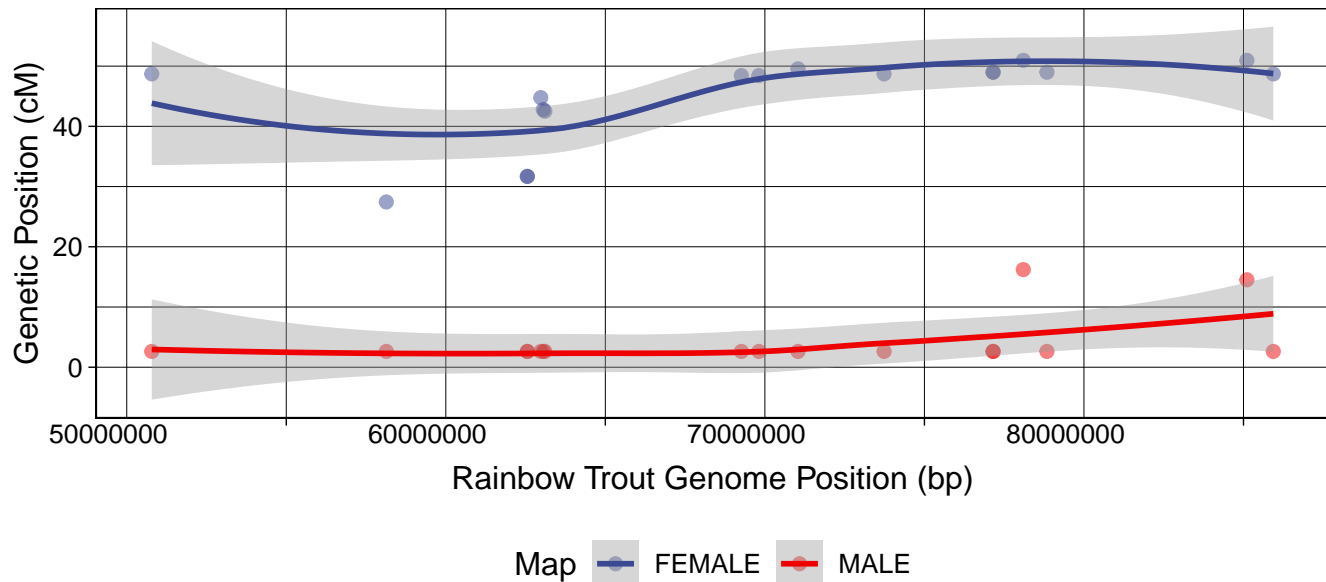

sna31 vs. omy5

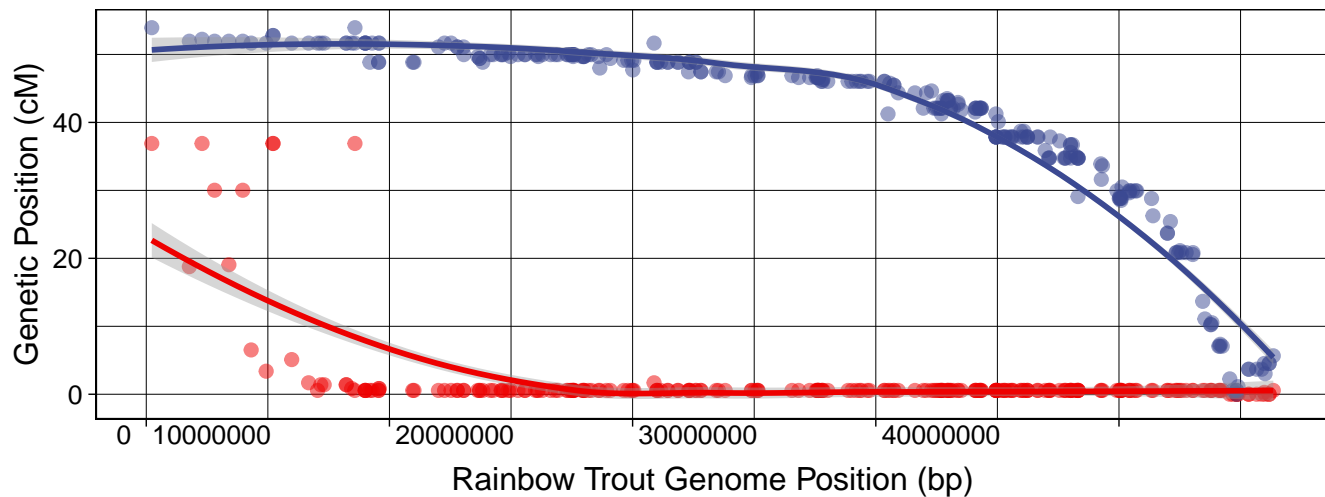

sna31 vs. omy12

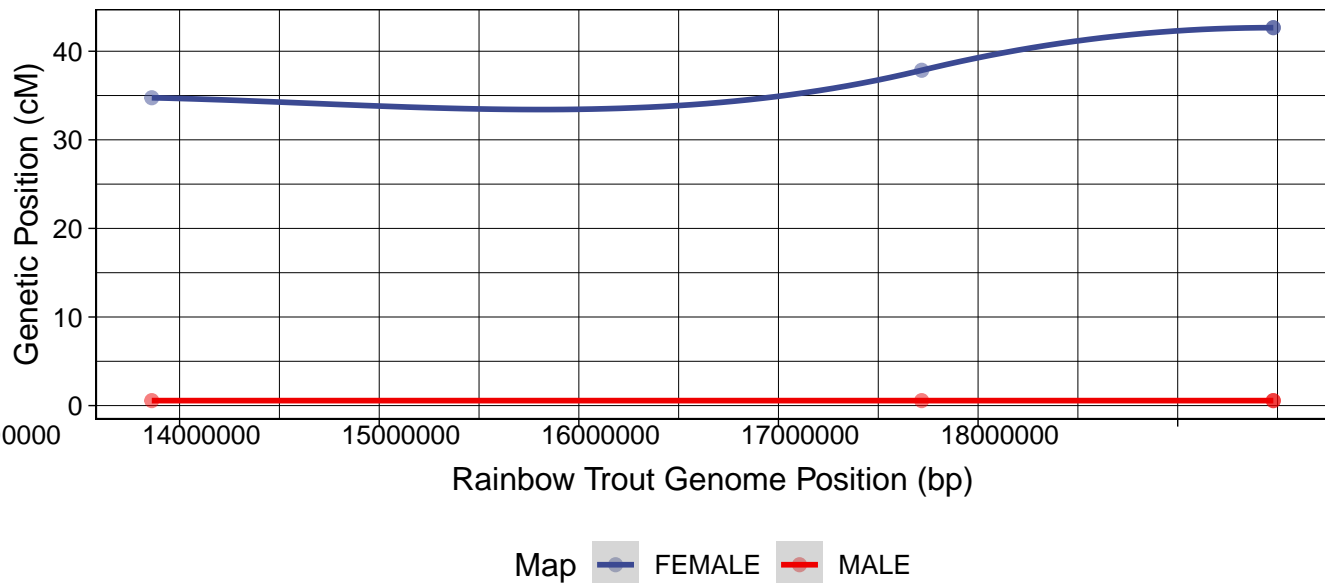



sna32 vs. omy14

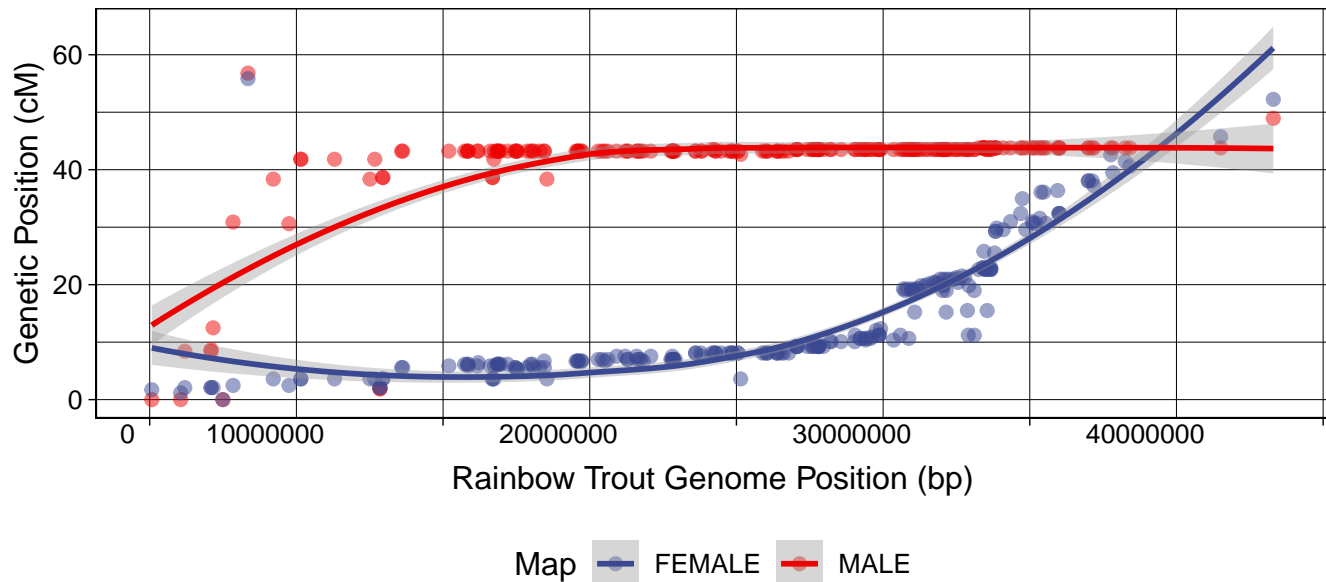

sna32 vs. omy18

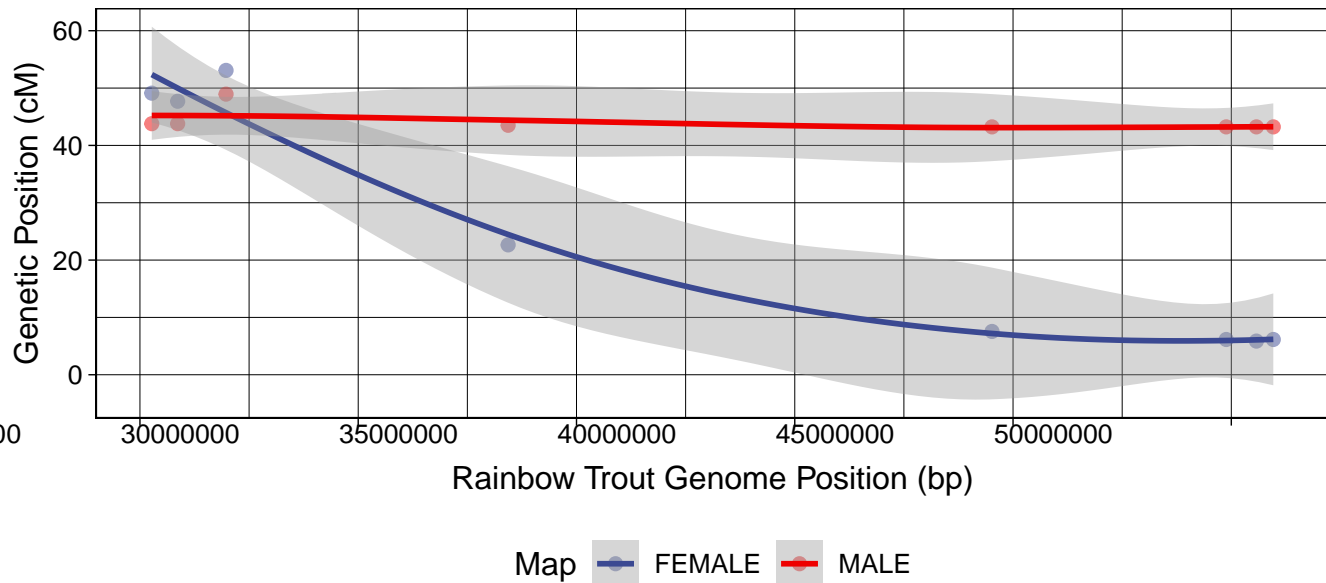

sna33 vs. omy11

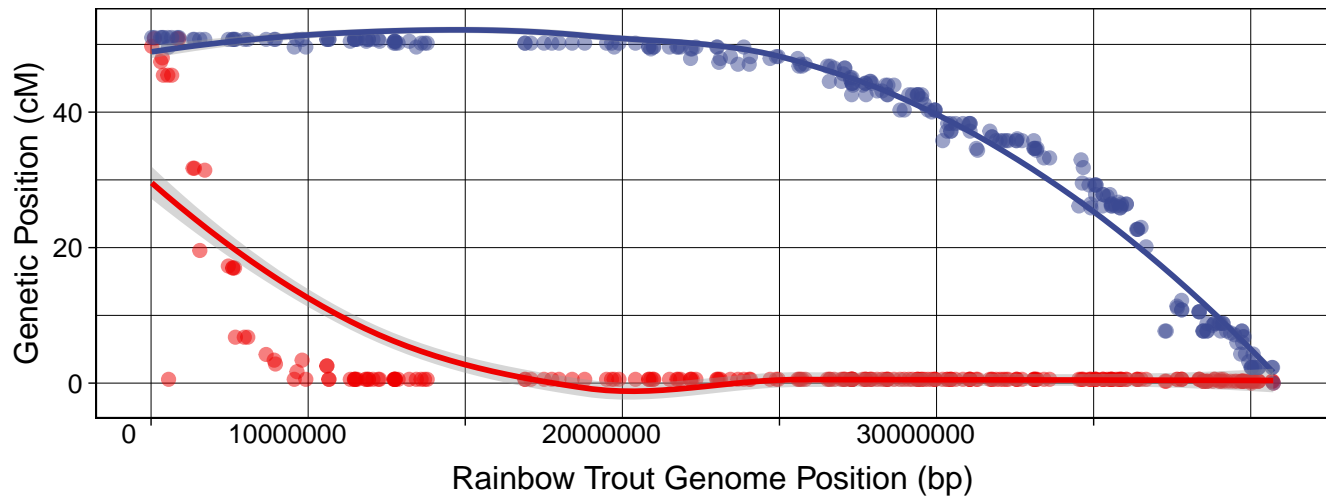

sna33 vs. omyUn3

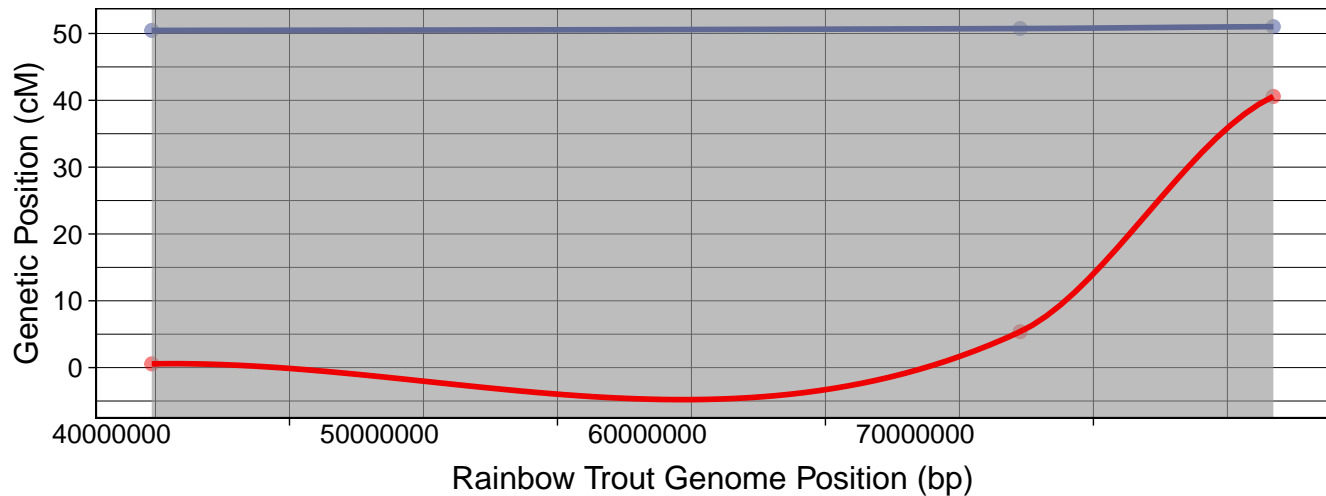

sna34 vs. omy24

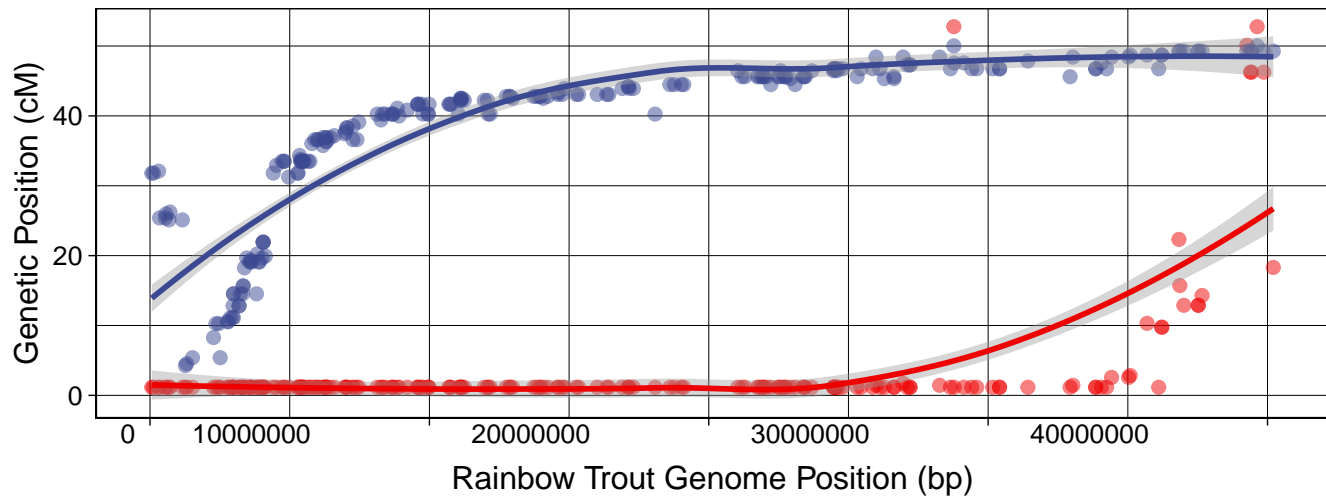

sna34 vs. omy27

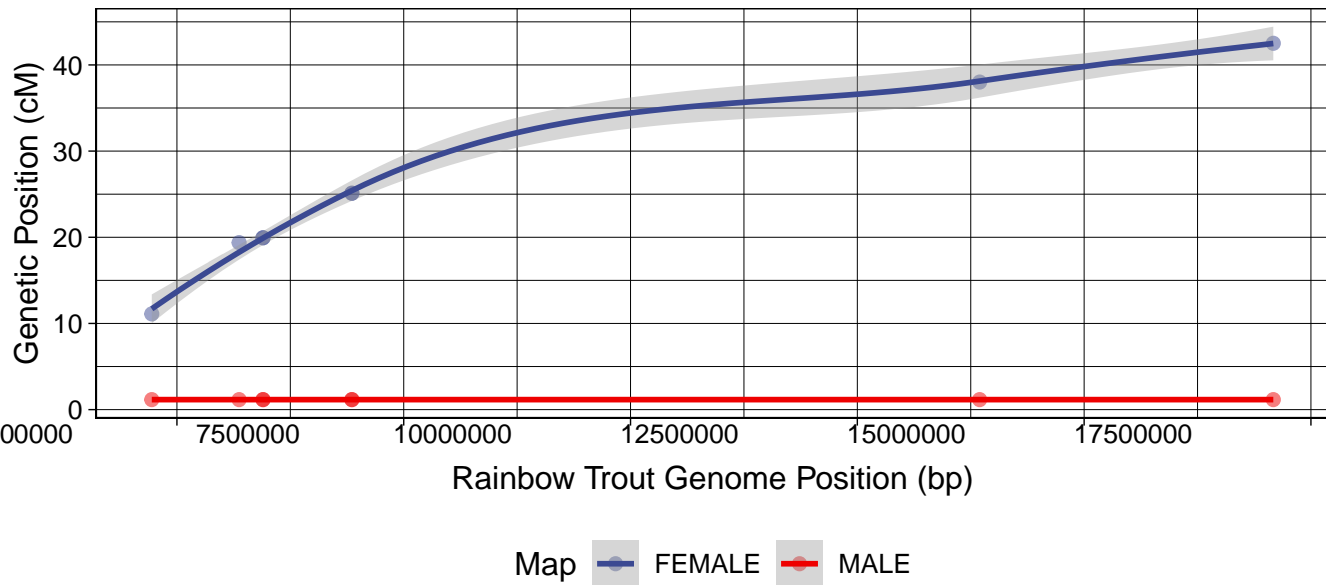

sna35 vs. omy20

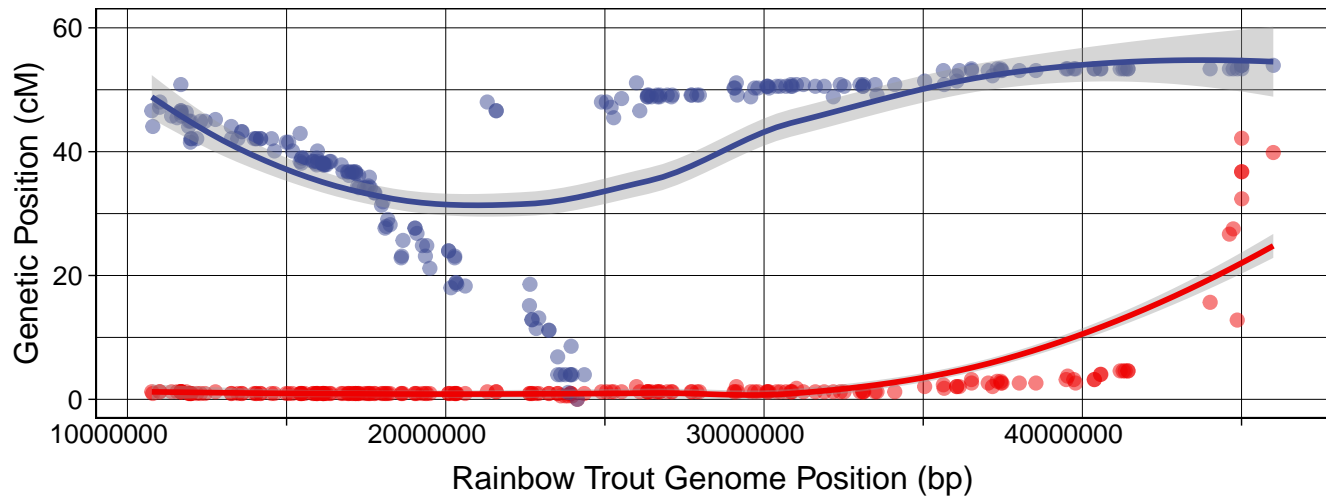

sna35 vs. omyUn3

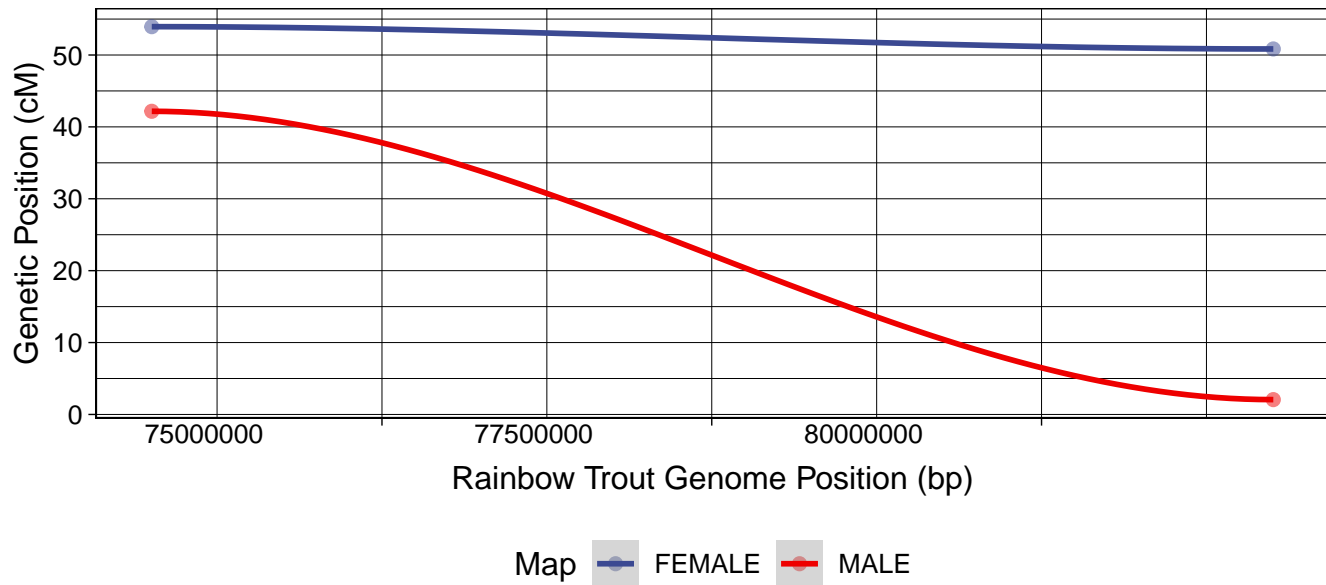

sna36 vs. omy9

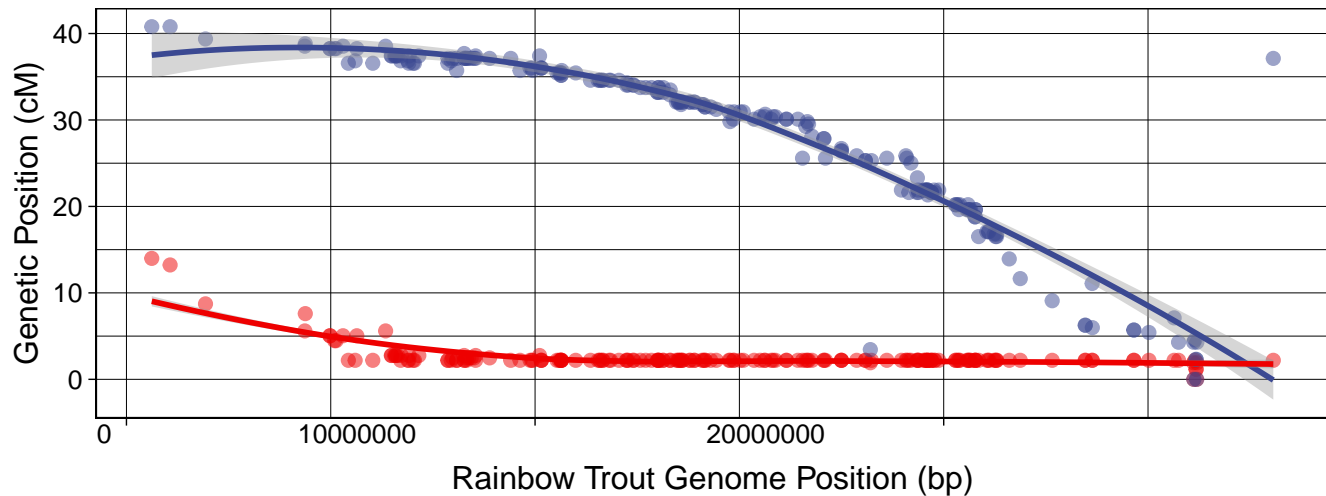

sna36 vs. omyUn3

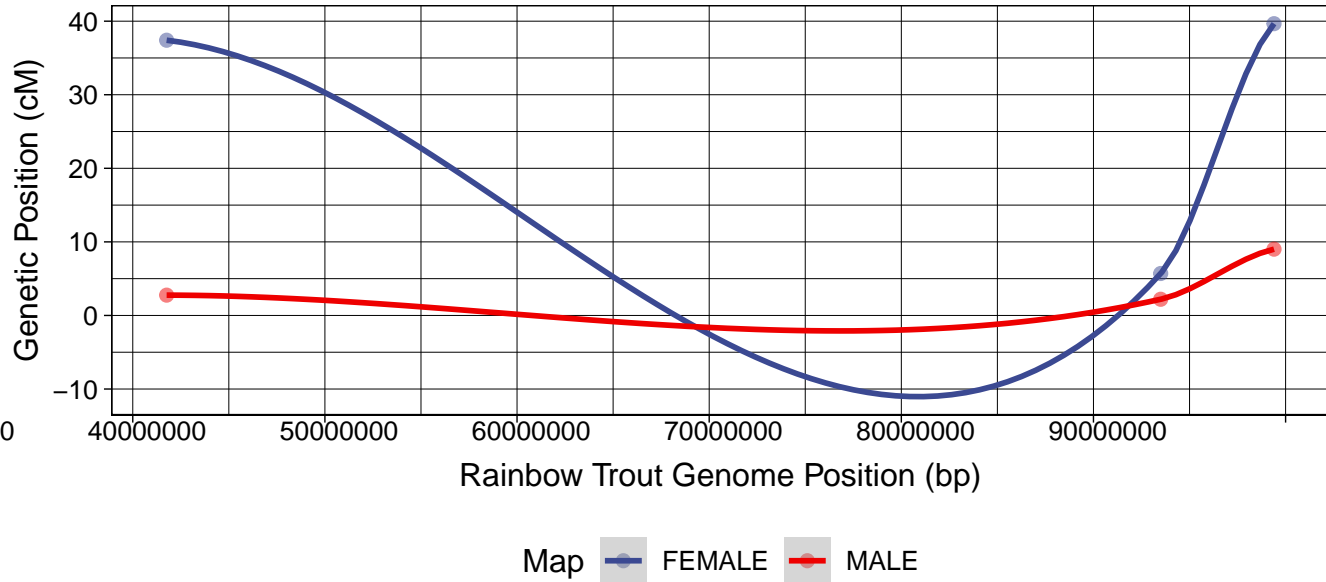

sna37 vs. omy3

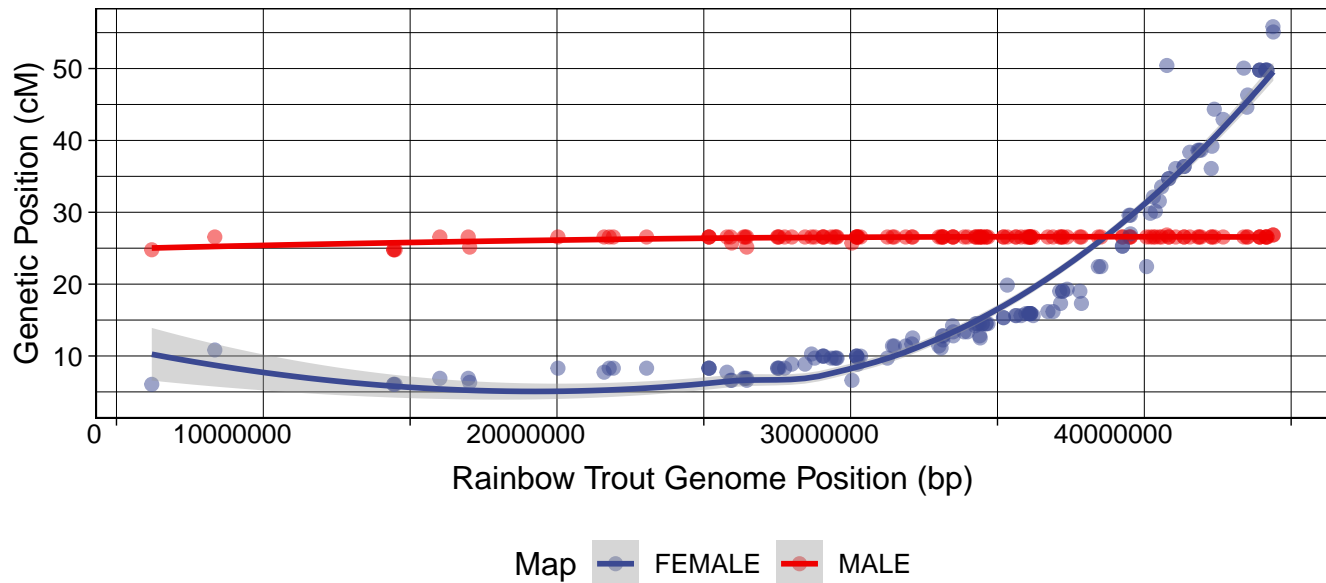

sna37 vs. omy2

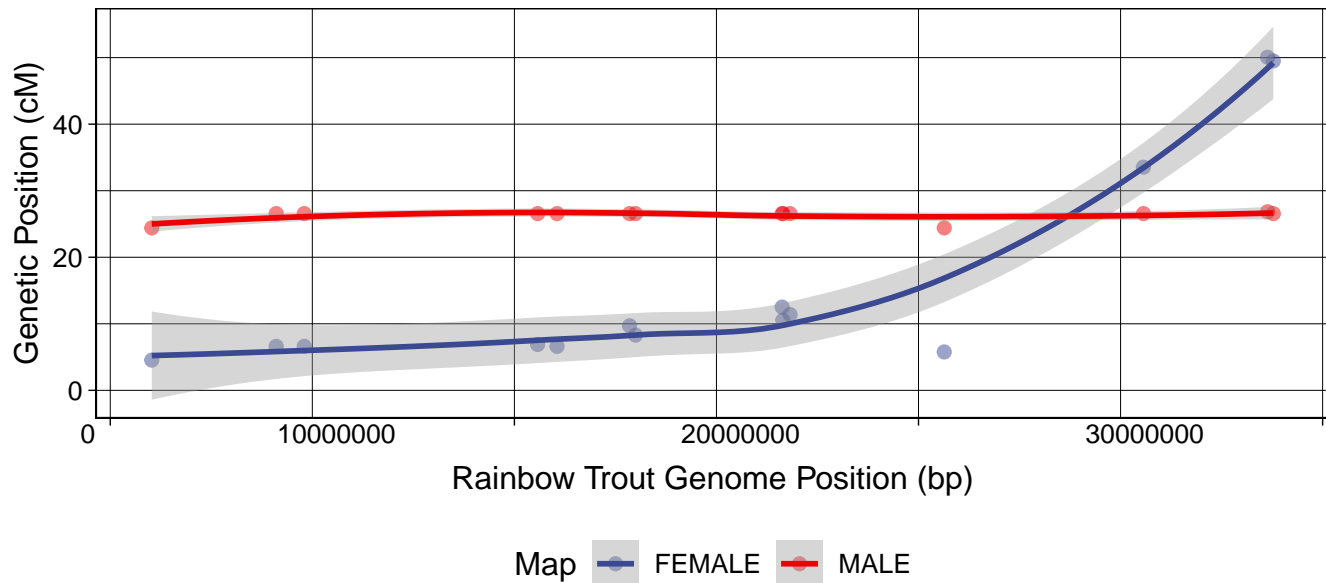

sna38 vs. omy15

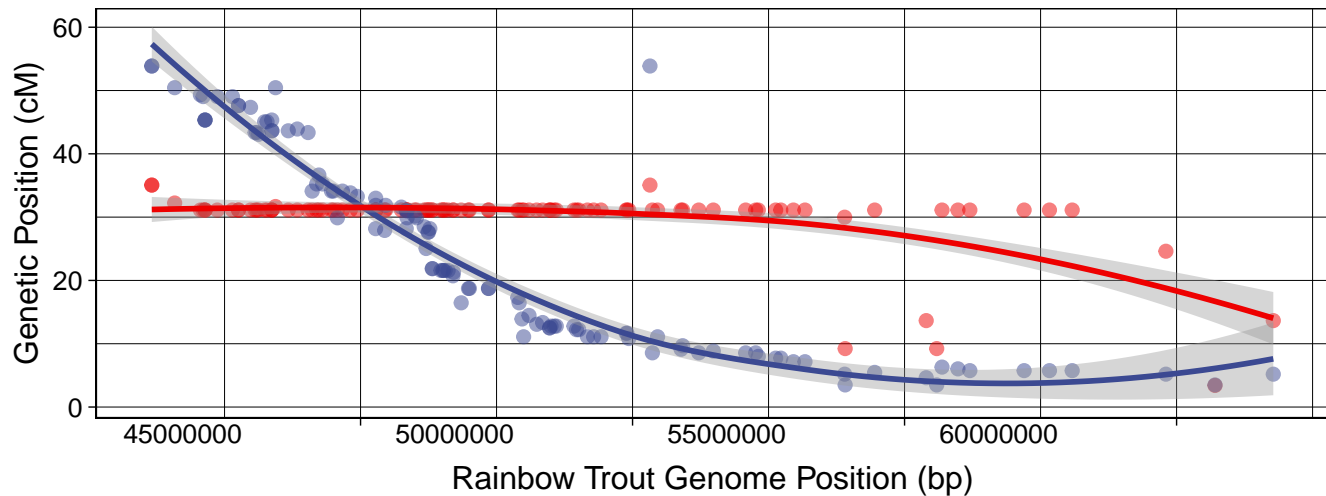

sna38 vs. omy21

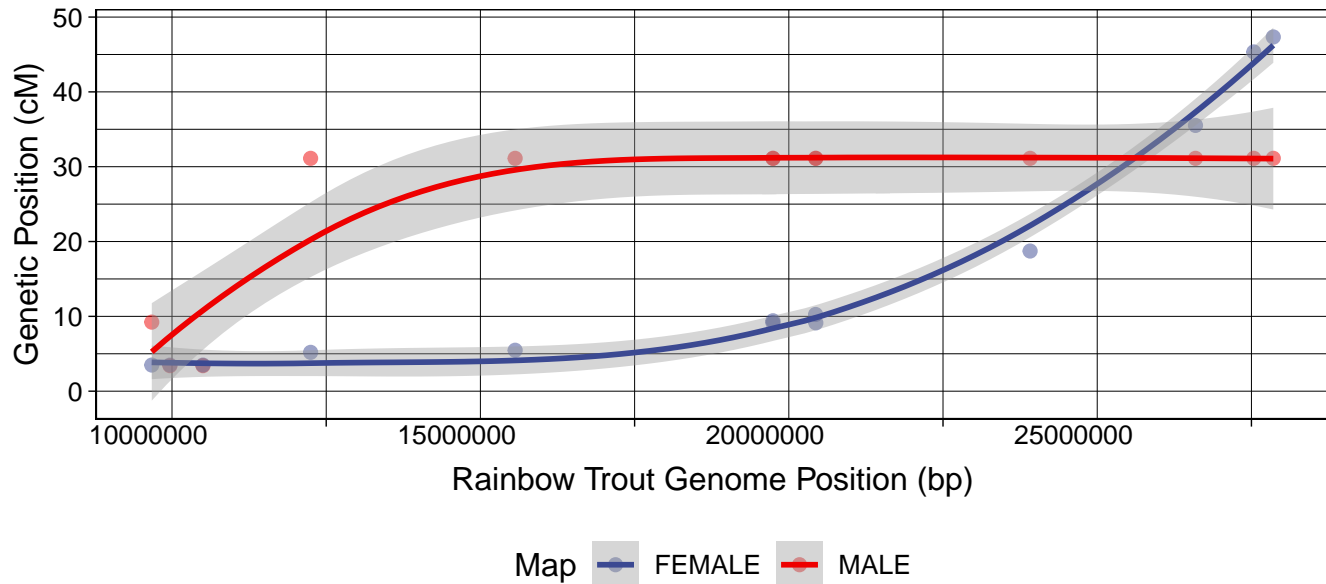

sna39 vs. omy13

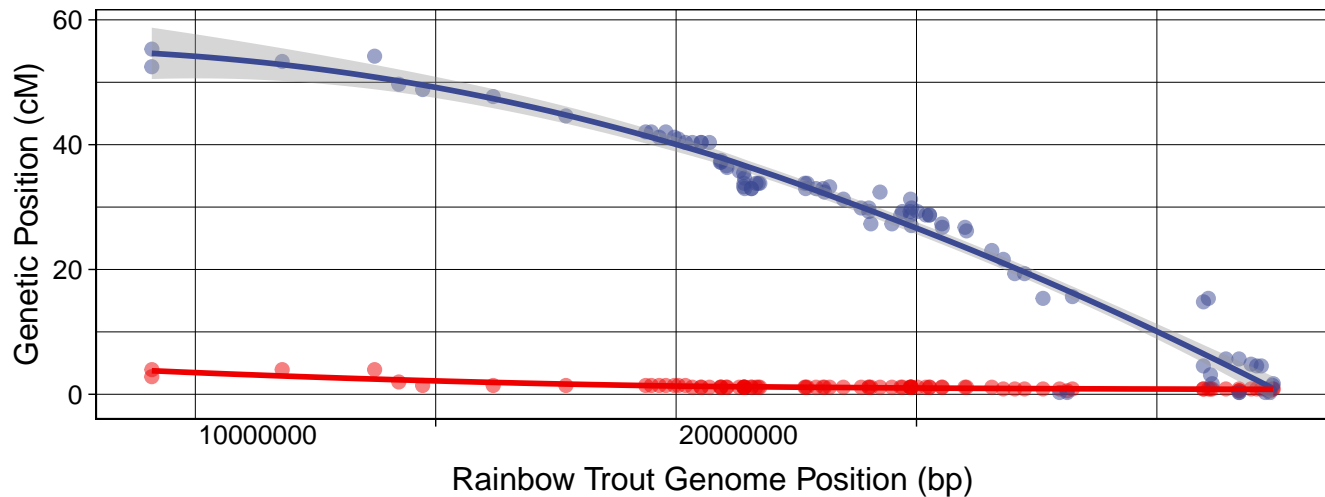

sna39 vs. omy17

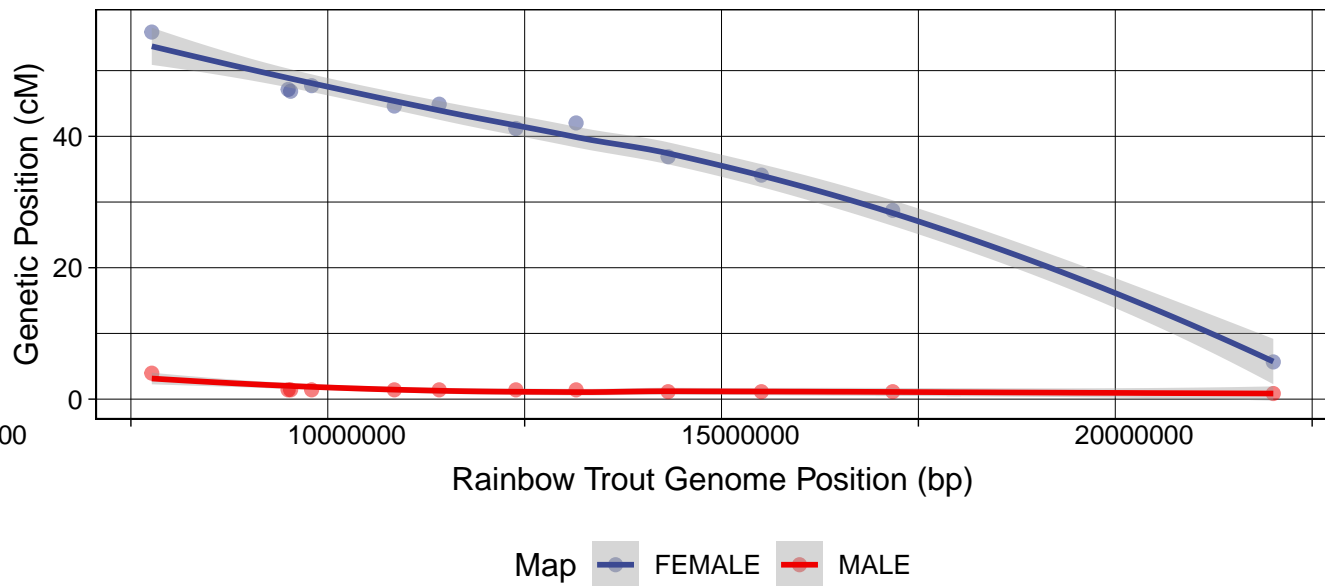



sna40 vs. omy7

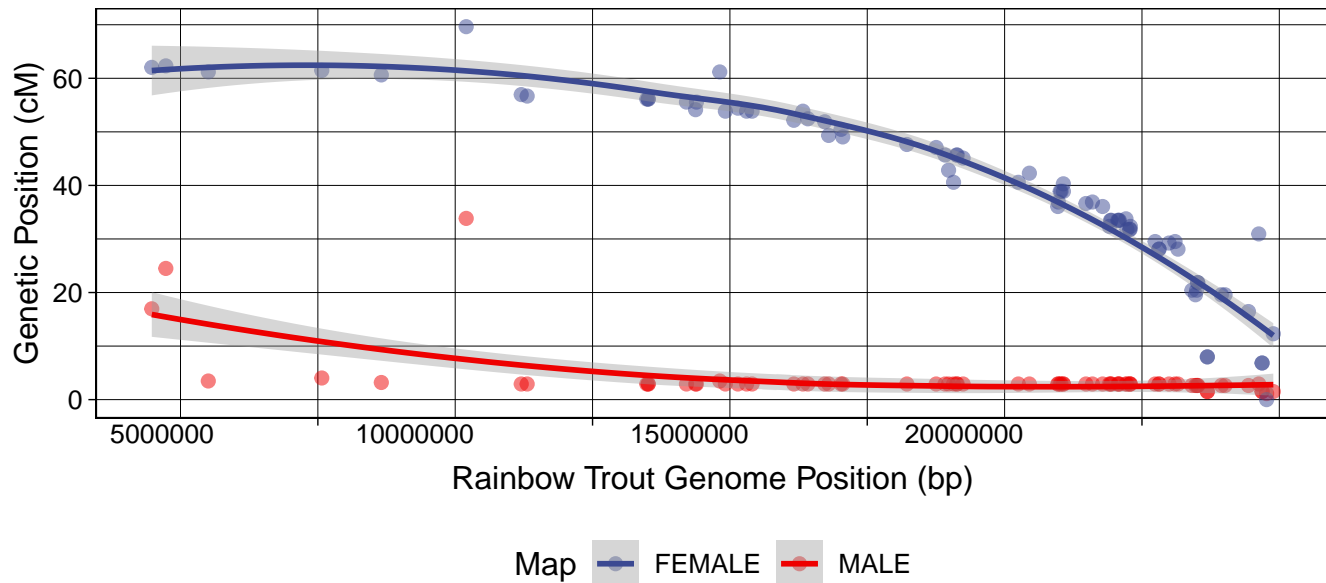

sna40 vs. omy18

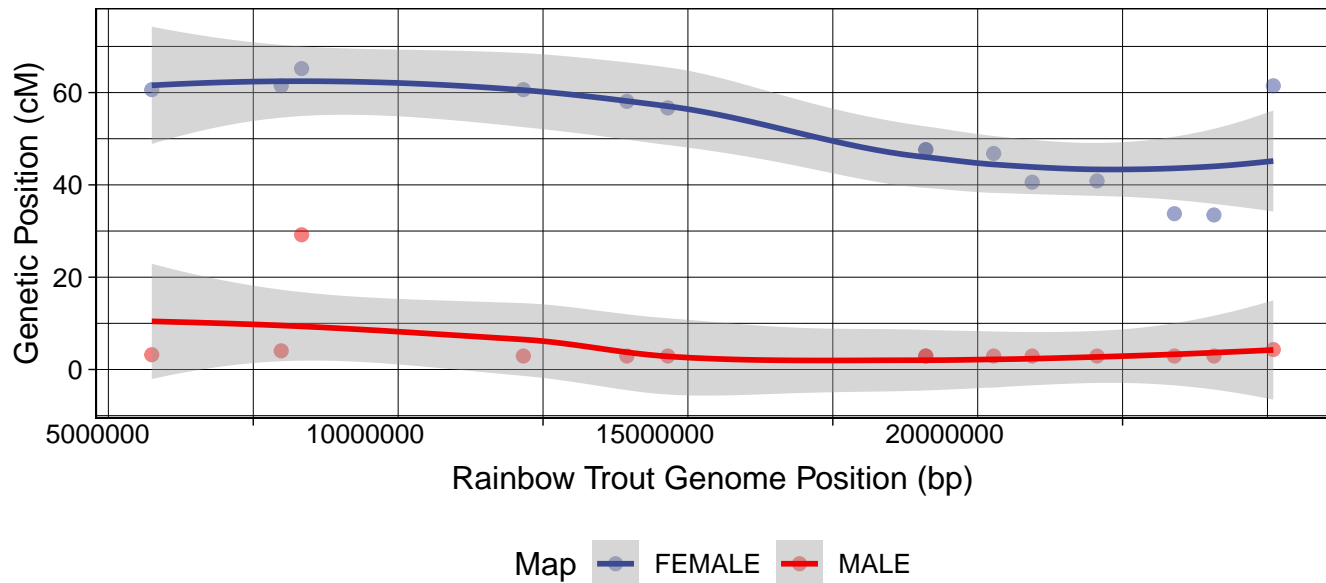

sna41 vs. omy13

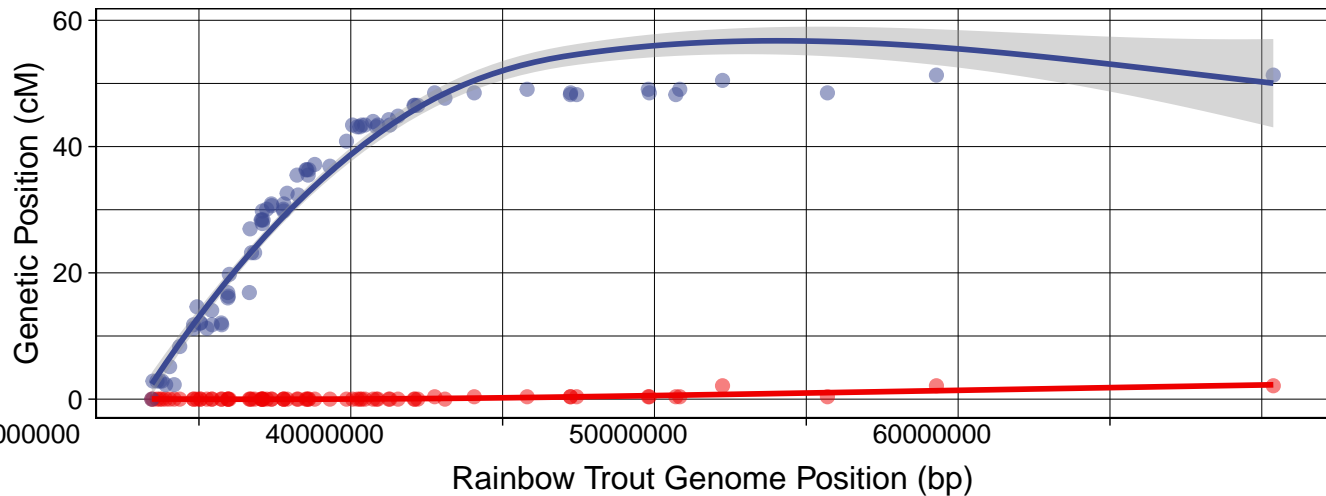

sna41 vs. omy12

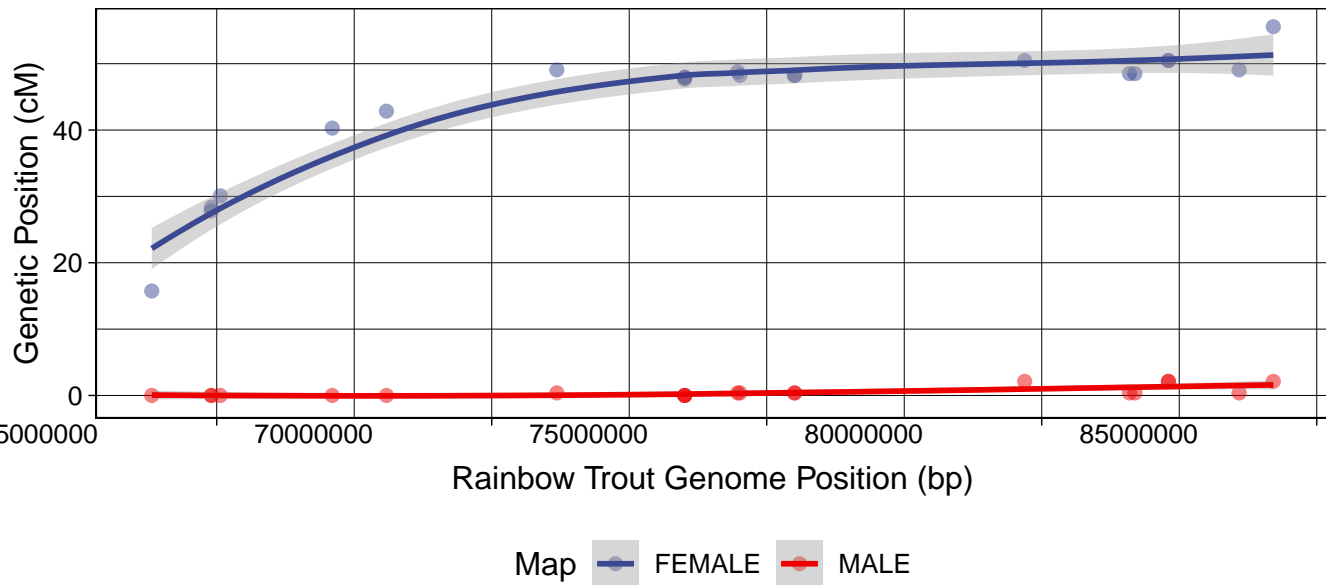

sna42 vs. omy19

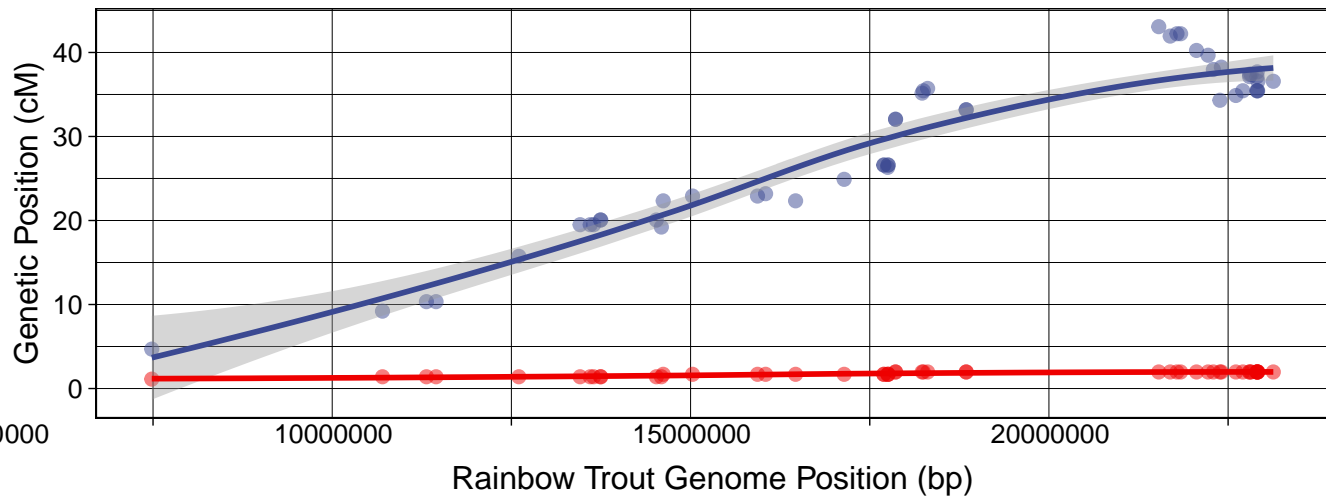

sna42 vs. omy10

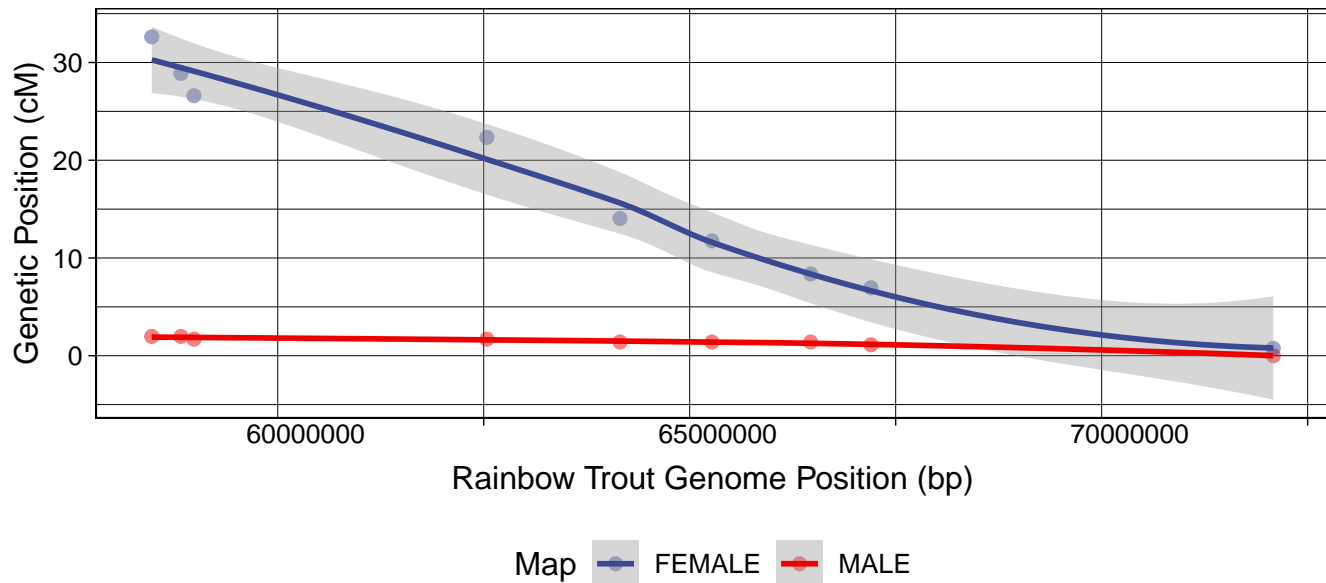

Supplement: Supplementary file 9 [file 1]
