# Supplementary material
Source: publisher figshare collection journal article supplement (https://gsajournals.figshare.com/articles/dataset/_/11908326)

**Figure S4:** Alignment of the female lake trout linkage groups to the Arctic Char chromosomes displayed as an Oxford plot. Lake trout linkage groups are identified on the Y-axis, while Arctic Char chromosomes are identified on the X-axis.

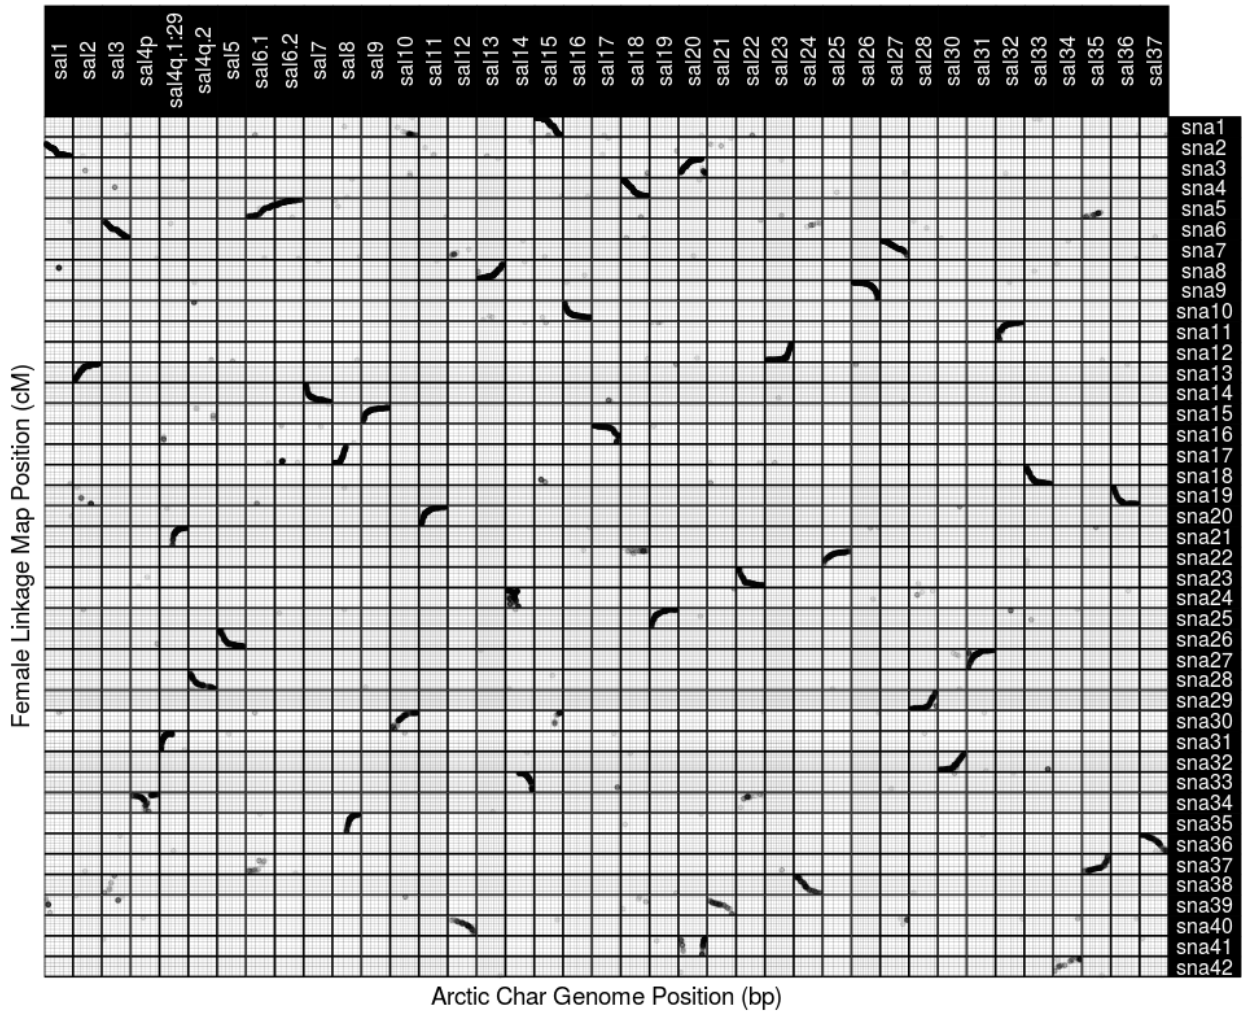

Supplement: Supplementary file 1 [file 1]
