# Supplementary material
Source: publisher figshare collection journal article supplement (https://gsajournals.figshare.com/articles/dataset/_/11908326)
Supplement: Supplementary file 1 [file 1]

## Sheet: Linkage_Map_Information
Table S1: The linkage map generated for lake trout. RAD_LOCUS_NAME is the name of the linkage mapped RAD tag (assigned by STACKs). LG is the linkage group to which the RAD locus was assigned. ORDER denotes the order of RAD loci along linkage groups identified by OrderMarkers2. MALE_POS is the position of the RAD locus on the male linkage map in centimorgans. FEMALE_POS is the position of the RAD …
RAD_LOCUS_NAME	LG	ORDER	MALE_POS	FEMALE_POS	RAD_SNP_POS	LEPMAP_SNP_ID	CONTIG_SEQUENCE
CLocus_138307	1	1	0	0	313	70490	TGCAGGCATATGGCTTACATGCCCCAGGGTCAAGGTCTCCGGCTGCAGACTGAGTTTCTCAAGCACCATCAACGCAGCTTTTAATAACAGCGCCTGAAACGAGGTGTCAGGCCGCCTGTCTCCTTGGAGGATCTTTCAAGGTTAATGCATCAACAAGTTGCGGGCCGTGGGGCATATTGGTTTACAAACAGATGTATTTCCCGTATGTGTGGGGCCGGGGCATGGCTGGGGAAACTGACGGATGTGGGTCAGGAAGAGGGACAAGGTCGATGTGTTGAGTGGCTAACAAGTGACCAACTAATCCAGGGTTTAGGTTGTTCAAACAAACCCAGGGATGTTAAGGGGAATATTTGTTGAAGAATTAAGTGACAAAGATGGAGGACCATAAAAGAAAGGGGA…
CLocus_45747	1	2	0	2.35	186	30261	TGCAGATTTTTACATCGTGGTGTGTCCTCATGTTGGGTATTTCAGAATGACTGTTGGTGTCATGCGATAGAAAAGCAATGTATTTCCAACAGATGTTTTTTTATTGAAGACAACTGGATAAGAGCAGTCTCTCCTTTCCTCATAACTGGCACAATATTAATGTATCGAAACAAATAACAAATGTGCACATTTTATGACATGTTACTAGTACTGTAATGACCAGTGACGTTTCGTGAAGATCCTGTTCACGCAGCGGCGATGGGATGGTAAACATTATCTCCGTTCCGCCAGCAAGAATAAGCGAGACCTTGCAAGAATAATGCCCTGACCTTGGCAATTTTCCTTCAAAATAAATGTCCCGCAATGAAGATGGTGAAAATTAATAAAAAAGGTCGAAAT…
CLocus_70532	1	3	7.9	2.35	126	44388	TGCAGCTGAGCGAGAGAGAAAAAACAAGTCATTTTCATAAACCTTAACTTGTAGAATATATCCAGAACCCCTGGGGCTAGTTTTAAAACATTTAATCCAGATCAAAATGCTCCTGTGTTGGGTAAACTTCTTCGCTTCGGATGCGTTTTATCCTTGTTTTTGCATACAGTTCTAAAACAAAACAAAACCAAATCTCTAACAGCTAAAAGCACTAGATGAACCTAGTAGCTACAGACAAGCAACCAGAATCAACTCTATGCCACTCAGTGTGATGTTACTGTCATGACATTCAATGGTGCCTGGGTCAAATAAAAATCACTTGGAATATAGCCTAGTGAAAGATTTCTACTCCTACATCAGAATAGACTTGTATTGTACCCTGGCTGGTCTAGAAGTAAA…
CLocus_81735	1	4	7.9	2.73	84	50120	TGCAGTACTGACCTGTACATTACAATAATGTTACATAGTGTAAGACTACACTCAGGGCAGGGCTGTGGGAAGCTGTCTCTCTCTGTCTCTCTTTCTCTCTCTCTCTCTCTCTCCGCCTACCTTCGGAGTCCCTGATCATATGTCTG
CLocus_51059	1	5	7.9	3.11	125	33393	TGCAGTACATGCTGTTGGATAGAATGACAGTAAATGTCAGATATGTGTCAGAATTCAGCCAGTGTTGGGTAGATTGATTTGCCTTGATGAAATCACTGACTATTTAATCAGTATTCCAGTGTGATGTGGTGTTGTATCGGAAGAGCGTCTCCAGGCTTATATCAACAACACAACCGTCTGTCATCTATTCTGGAGTAGCTGCTGAGCCCATCACATATGAACTAGGTTATTGTATGTAGAGTCGGCTACAGCATTTTAAACAAGACTTCCAAGGCCTGATGGGAGTGTTTGGTATCTTGATAGAAAATCAAGGTGTCCTCTAAAATACTTTTGAGACATGGAAATCTTTCCATGGTGCTGGAACTGTAGCTCTCAAAAGAAACATCTCCATATGTTGAT…
CLocus_45582	1	6	7.9	3.49	23	30174	TGCAGGAAAAGGATGGAGAGAAAAGTCGAGACAAAGACGAGAGGAGAGAGGCGAAGGCCAGAGAGAGATGTACGCAGAACGGACATCACTTCAGCATGGTCTCCTCCCAGACACAATCCTCCTCCTGCCACCAATGCAGCAAAACCATCAGCACTAAGGATGCCTTTCTCTGCACCAGTAAGACAGCATCAGTCAATACAACTGTAATAAAACCATTAGCAGGTTTAGTAAAGCAGCTCAGTACATACACACCATATCGCTCAGGATGGAGCTGACAGAGAGGGCTGCCTTGCTTCTAGTCCTTAGGAAACTTGCAGTTTAAAAAAAAAAAAATATGTATTATTTCCTACATTGTTAGCCCAGAAAATCTCAAGTTTTATTACGTACAGCCGGGAAGAA…
CLocus_54671	1	7	14.49	3.49	118	35723	TGCAGTATACGTAAGGAGTTTTCTTCGGTAAGTGGGTCTTGTTTCCTTTCCAACTTTCCCCACTTAAGAAAGCCTTGTTATCTGGGGTTGCTATTGTCGTAGGGTGATGAGGCAACACGATGAAGTGGGAAATACTGATTCCTACTCCTCACGCGGGTGAAATCCTGTCCAGGCATATTCTGCTGTATAGCCACCACTTAGCCTTCTGCTCTCTCTTTACACTCACCCGCTTAGTCCCTCCTATACAAATGCGTTTCTTTGTTCTGTAGGCTAGATGGTGTGAATGATTCATTAACAGTCGGTCACAAATGTCTACCCTCAAGTTGTCTATATTTAACCAGCAATTTGCAAAAACGTTTCAGTTTGCTGTCAGCTAGCACAGTTCTCTCTAGTCCTTTT…
CLocus_50050	1	8	14.49	3.49	287	32858	TGCAGACAGAAAGGAGCCTGGCGGCTGCTACATGAGCGCTCTGTCTCTATCTCACCATGAGGAGCGTACCTGTTGCACCGGGCGATACGAGTGTTAGCGTGTATCTATCTAGCCACACAGCCGCTTTAGGATCAGATGTCTAATGTATTCCGCCACACGGCTGCTATAGGATCAGATATCTAATCTATCTCAGCGCGAGGCTCCTCTGGAAGCATATCGCCCATCTATCTTACCAGCAGCCACCAAAGAAAACACATTTGGTGTGACTTAGTACACATAAATCATCACTGACCAGAGAGAGAGAGAGTACAGGCTCAGTGAGCACAGCCTTGCCATTGAGAAGGGTAGACACAGGAAAACCTGGCTCCCTGTAGAGGAAAGTGTCACGTTCCTGACCTA…
CLocus_216	1	9	14.87	5.4	45	271	TGCAGACTGTTCTAGTGCCCTGGCCAATTTCAGGCTGTATCCCTGTAAAAAGCCTCTGTCCACCACTGGGTCAGAAAACTAACACCCTCTTCTCCTCTCTCTCTCCTCCTCCATCCATCTTCTCCTCCTGCACAGAACCAACTTGGACTCGGCTCTTCACACGAGTGCCATGAACCCCAACCCCCAGGACCCCTTTCACATATACCAGCAGATGGGCCGAGGGCCCCCCCAGCGCACCGGTGAGAACACACACAGCATCTGCACATACATAATTGAAAATGGAAAGCTGAAATGTCTTCAGTCAATAAGTATTCAATCCCTTTGTTATGGCAAGCCTAAATAAGTTCAGGAGTAAAGATTGTCAAGTCACATAATAAGTTGCATGGATTCTAAATTGTG…
CLocus_72006	1	10	14.87	5.4	128	45301	TGCAGTTCAGTTGGTTGGATCAAGATGGCTGAATAAAGACAGAGACAGACACATAAAGATAGACAGACAGATGGAGAGCACGCGAGGGAGAGGGAGAGAAACAAGAGAGAGAGCGAGAGAGAGAGAAGCAATCAGGGTGTCCCCCCACGTGGCCAATGAACCACCTCTTGGCCACAGCCATCCTATTTCCCAAGTAAAAATAGCCTTTGAATGACCAAAACATCACCCATAATATTTTTCGCTATTAAAATGCTCAGAATTGAAGAAAGTGTACCTTTTCTCTCATCTCCAAATATCAGGAAGCCTGAAAGAACAGGTTGAGTGGGCGGGAAGCTTATATTCATGAGAAAATATGTTTGTAGAACTGGCAAATCATCAGTATGCTGAATTGAATAAAGC…
CLocus_30881	1	11	14.87	5.4	270	21010	TGCAGGGAACATAGTAACTGGATCAATGATACAAGAAAACAACATTTGCATCAATTTATTATGGCAGAAAAAGAATCAAAGCAGTGTTTATGAATCGCGGTGCATTTGGAGCAGCCCCCTCTTGTTCTTCACACATCTAATTTGCTCATGCATATTACAACATGCACCATTTGGCTCATGAATATGATATCGCCGGGACTGGGAGTCCTCGTAATCAACAATCTAGTCAACGTCTGCTAGTGGCTTTCTAGATATGAGGCCCGGTTCTCGCTCTCTCTCTCCTGTGTATTAGTCTGATCACAACCATTGTTGTTGACTTGCTATTGCTACGGTAGATCCAATATGTATGTATACATGCATTGTAATCAGTGCCTTTTCATGTCTACTTTTAATTGCATT…
CLocus_69758	1	12	14.87	6.54	108	43997	TGCAGGAACTTGACCCGTAGCTCCGCCTCCGTGAACACGTCCATCCTGCGCAGGTAGCCAATCACACGCAGGCACACAGGAAGTTGGGAGTTGCTACGTAGCTGCTGCAACAGCTGGTTCAGCATGAGCTGAGCTGACTG
CLocus_61045	1	13	17.18	6.54	128	39450	TGCAGCTGGAGCGTCAGACAGTAGACAGGCTGTTCCCTGCCCTGGAGGAGCTCCTGGACCTCCACACCTCCTTCCTGACACGCCTCCTGGAGAGGAAGAGAGAGAGCCAGCAGGAGGGGGAGGACGGAGGATTCATCATCGGCA
CLocus_21283	1	14	23.59	6.54	258	14593	TGCAGTCGTTTAGACGTCTGCATGGTGTGTGTCTTTGAACTGTAGTAGGTCATCTTTTAGTACTGCTGAACACTGCTGTGGGGGTTTGTGCTGTCGCTAATGTTTTTGGCTAATATGGTATAAATTTGTATCCATTTATAAAATAATTGCGTGATCCTCTTTATGTATGTAATACTTGCATAGTTTCCCCCATCCTAGTCTTCCTGAAAAATGATGTGCGGTAACACTGAAATATTTTATGCCATATTACCCAAACAATAACATCACCTGCTTACAGGTACTAGATGGATTCTGGTGAAAGGGTATCTGTTTTGTTTCTGAAACTTGTTTAAATAATTCATACTTTCATTAGATGTTATAGTGGGCTTTTCACTCTTTCGACAACTGACGTATCCGTGT…
CLocus_67749	1	15	23.59	6.54	56	43002	TGCAGAGCAAGAGGGGGGTTTGTCCAGAGGGAATATAGACATGTTTTGTTTTTCGTATATATTTATTTACAGCAAACATCAAGGATAGCCTAGCCTATAGCCTGCAAAATATGAATGACTGAGTATACTGTAGGGGCGAGGATAAGTACAACAGTGGTTGTAGTGAATAGACTCAGCAGTGATGCTGAGAAACTCATTTCAAGCACACTGTGTGGTGAAACTTCTCTCTCTCCCTCCATCTCCCTCTCCCTTCCCTCATCTCTCTCTCCGTGCCTCCATCTCTCTCTCCCTCCCTCCATCTCTCTCTCTCCCTCCATCTCAATGCCATACAACACTCCTTCCGTGGCCTCCAACTGCTCTTAAACGCTAGTAAAACCAAATGCATGCTTTTCAACCGTT…
CLocus_124427	1	16	26.69	7.39	61	67155	TGCAGATTTACATTTGAAACCAAATGGCAGTTCAAAGCCGAAATGCTAAAATTCCAAAGCTAACAATAATGAAGCATTTGCTTTATATTGAATTGCCATTGTCCTCCATGAGAGGCTGGGTATTTGTACATGCCTGAGACAGTCGAGATGGCCATGATGACTATGCACTACTCTACCAGGCAGCTCAGTATTAGTATTCTAGTCACAGACGAGGGAGGGAGAGAATGAAGGAGAGGAGAAGAGGAAAGAGGAGGGAGAGAAGGGGGGCACAAGCAACATAAGCTATTGACTGCTCCTGCATTATCTTGAAAGCACAGAGAGTGATTTTCCACAAAAGAAGTAGCAGTCTCTCTTCTGTCCTACAGGTTAAGGCAAGTTGACAATAGTTTTAATTGTCCG…
CLocus_98041	1	17	26.69	7.39	16	57561	TGCAGGGGCTGCGAGGAAATGTGCAGGCTCCAATAATAAAAACGGCATACGCCTTTGATAACAATGAAAATGTGCTGACATCAGAGAGGCTTTATGGGCTGTGTGATGTCTGATAGACCCTCTCTGATCATTACTGAAACACAGTGAACAGTAGCAACGTTATTCAACGACGCGCTAAAATGGTTACACAGTCCACAGGGGACGTTATAGAGATGAAATATCAGCTTTTACTATCTTTACTATCTAGAGGAGCAGGGTAGAGTCAAAATGATTGACTCTACCGGAGTCATCTTAACCATCAACAGAGTGATATGCTCCCTGGAGTTAGTGTTGATAATTGGAGTTGATTGGGACTGAGTACTTTTAACTCCATAACTGCAAACAGAGACAGGGAGTTAA…
CLocus_4763	1	18	27.45	7.39	259	3414	TGCAGGAGCTTTCAACAGGGGGTATCTATCTCACTACCCTTTGTGCCCTTCACCTGAAGTCACTAGATGTGCGTACACTACATTTAAACGATGTGTGATCATGACTATGGAATTGTCCAAAATGAAATTTACTAGTCTATTGAGTAAGACTGGTTGGACTTCAGGCTGTTTAAAAAATAAACAACCATTTGTACATCCATTTTGACGCTTTTAAAATAATGACATATAGCCATTGATTCTTGTATCATTTACATTATATAAATGCCTCATAATTCAAAATATAATATTGTTTTACACCAGCCACATCCCTTAGCTGTTTACCAAAACAAGCAGCAGGGTGACCGCTTTTATGCTTTTGAATCCTAGTTTGCCCTTTAAAGCGCTTTAGGATTGCAGAGC…
CLocus_12275	1	19	27.45	7.67	47	8393	TGCAGGAAAAGGCTACGGGTCATTTCAGGAGTCCAGACCAAACTGGTGATGGTTGATATAATATTTCTACACAGACAACACTTAGTCTCTCTCTCTGCCTTCCAGTTGCTAGGAGTCAGGTGTGTGTGTTCGGCCAGCGAGGCCCGTGAACGGGGAGCTCCTCTCTGTGTACGGCCTGGAGGATGAGCTCCTGGCTGTTCAGTACCTGTGCCACCCACCCTACACACTGACTGGCACCCCCCAGAGGACCTGCCTGCCCAACGCCACCTGGAGTGGCACGGTGCCCATCTGTGGGAAGGTAGAAAAAGGTAAAGTTAAAGATCATGTAAATGAATGGATCAACTGTATTGATCCCCTCCACAGACAGGAATGTTGCAGACCTGAGTACTGATGGAACAG…
CLocus_25088	1	20	27.45	7.67	9	17037	TGCAGCCGCCAGTATATCACCCGCTTCCTCGAGTGAGTTCTAATTCCTAATTCTATTGTCCCACACTGATGACCTCATCATTCTGTCTAAGTTTCTCCCTGTTTCTCTCTCACGCTTTGTAATGATAATGCAAATGAGTAGTATATAGAAAACCTTACAATGCGTCATTCAATCAGGCTTAAATGAACTGATAGGGTTAATGCAATGTTCCCAAAGAAAACAGAATGCAAACATCATTTCCTCACTATCTGTTGTTCTCTTTCTGCCTCTCTCTATGTCTCCATCTGTCTTTCTCTCTTTTATTCTCTCTCTCTCTTCTCTCCTCATCCCCTTCAAACCACATTACCCGTCTCTTTCCCGTCTCTAACTCCCTATTCTACAATTCCACTCATCGTTTGT…
CLocus_56711	1	21	27.45	7.67	45	36913	TGCAGTTAGTGTCAGTGCATAACCCCTGAGCCAATCAGAAAACAAGAGGTCAAAAATAGTCATAGTGGTAATCTTACAGTGTGATAGAAACTAGTGTTGTATATTGTTCCAAGCATCCCACTGGTATGTAGCAAGCGTAACAAAGAAGCTATTGTCTGACCAAAGGGTTCCCTTTTCAAAATGGCTTCTTGGAGGTGTGTGCTTTCATTGCGATGCTAATCACAGAACAGCGAATGCAGCAATATCCATGTGAAGGGATCATGGTTTAATATTTCATTACCAACAGACTTGCCCGAACCCATCAGAGAATCACGGCCCCCTTCAAAAGAAATTATCCCGGCGATGAGACCTGCCTCAGATCAATGGTTTATTAATCTGAGCAAACACATGCACCATTGA…
CLocus_64190	1	22	27.45	7.67	24	41157	TGCAGGATTATTTTCCTGCTGTAGCACACTGGCTCAAATTAAGATCCTACATCTGTACTAACTAGCCTCTGTTACAGGGAAACTATAGTAGCTACTAGCCTAATATATTGCTCCACTAGTTAGCTACTTTGGTGTGAGGCTTAGTGTGAAGTGTGGTTGGTAATCAGTAATTTAACTAGTTTGCAAAATGTTGTTATTTGTTTCAAGAATAAAACTACTTCAAGAGCAAAACCTTGTCTTACAGTAATTCCAAAATGAATTGATGAATCATCTTAATTGTATCCATGTTCTTCTGCACTAATGTCTCCTTTACTGTAGGAGCCAGACTAAAGTGTTCCCTAAACCAGAGCCCCTTCCTCCCAACCTGCTCAACCCACCACCCACTTCACTCCTTCTATA…
CLocus_7566	1	23	27.45	7.67	123	5126	TGCAGGATAATGAAAACAGATGTTATTTGCAGTAGGATGTTTTGTTAATGCCTGATACAGTGCCATTACACATCGGAGCCTTACCAAGCGTACTGGGGAATTTGATTCCATTCACACAATATTTGAGAGAAAACATATCCACCTACATAGCTTTATCACATCAAATGTATAGCCCCTGTTGTTTGCCCCATGTGGATACTGAATATCAGATTTGAGTAGAGATATCAAAACCACCTCTTGGTACTGTAGTCTACCAGAGAGGAATAACTCATCACAACAGCTTGTTACCAAATGGCACACAGTACTTGTTACAATGATTCCCTGAGAAACCGAAAAGTAATTATGAGGTGATTAAAAAATCCTTGCTGAACTTAGTGCACCATGTTCCAATGCATAAAT…
CLocus_12697	1	24	27.45	7.67	8	8688	TGCAGAAATACAGCCGGTATGACGCTGCCTGCTTGAACGGTGACTAGCTCAGAGACACATGAAACCATGACATGACCCCAGGAATCGATAGAACAGCAGTCAGAGATTCACAAATAGGATGTCAATCGTTCCTTTTTAAGTGTCTATGCTTCTTCAGCATGGTTCCATGTAGTGATGATGAGTTGATCCCACATTGTGTCAGTTAGGTCCGTTTTAACATGGTGTTCAACTTTGAGATCTCATTCACCCAGGGTAGGGTAGTTGTGTGTGTGTGTACAGGGGGAAGAAAGAGTATGTGAACCCTTTGGAAAAACCTGGATTTCTGCTTAAATTGGTCATAAAATTTGATCTGATCTTCATCTGAGTCACAACAAATAGACAAACACAGTGTGCTTAAAC…
CLocus_34024	1	25	27.45	7.67	25	22968	TGCAGTGCTATTTGTTCAGCTATGCGTTTCATCTCTTTGATACTGAAGGCTTTCCCTGCCTTTGGCAGTGGAGCAAGTACTGGGACTCGGGGACAAATAGCATTTATGATGAAAGAGTCCCTTCATACATTGTGCTGGTGATATGCTGTCTGCAATGTCACTATGACGAAGCCCTGCTTGCAGAGTTAGCGCTGTGTGGAATGCTTTGTACACCAACAAGGGACGGACATGGATTCCAATGTGACCAATGTCAGGATCATTTAAAAAAAAAAACGTTCACACAAAGTCAAAGTAAACATATATTTTTTTTTAAGTACATTTGTATTGTTTCCACGGAGGGGATCCCGATGTGACCAATGTCAGGGGAATTTTTTCAAATCATTGAAACTCAGTTCATAA…
CLocus_35515	1	26	27.45	7.67	238	23875	TGCAGAGGTCCAGTGAATAGAGGTTTAGAGGGAGAACTGACATCTGATGCCTTTGTGAAAGAAAAACACGTCTGCTGTCCAGGAGAAGTTTACACAGGTTGAAGTGGTGATTTATAAACTCTATTCTTTTCAGAAAATTCCACACAAAGGATGCTAATATTTTCAATAGTCAAGTCACTAGCTAAAATAAATCAAAATCGATAAGCGTCAACAATACGAATGTCTGAACTTATGTAACACCAGTGAAAACGTCATTCACCTTTCAAACAGTAAAAAAATGGACACACTGCACGGTGCGTGTTAATTTACAGCTTAAGTCTTAGAAGTCTTGCCCACTCACAATCAAGCAGAAGGCAATAATTGTCCTCGCTGCAATTTCCAGATTCCTTTTCATTGCAA…
CLocus_46585	1	27	27.45	7.67	102	30783	TGCAGAAGGTATGCTACAGCAGTGTTACTGAGTCAGAATCTGGAGCCAGACCAGACACTGCATTAAGTCATCAGTGGTAACTAAGTGATAAGGCCTGTGATTGGTTTGTTGATTTACGAGGCTATGGGTCCAATGTAGGGTAGAGGTCAAGATTACACAGCTTTATAGACTAATGCAGGACAAGGGTCAGTATTAATGCTCTCTATAGTCTGGTCAGAGGGAGGTATGGGGCCCAGGCGAGGGGCGAGAGTAGGGGGGGAGAGAGGAGGGAGAGGTGGTCTCAGTGTCACTAGGCAATAGGTCCTGAAGTTGGGGGGGAGATGAGGGAGACAGGGAGGAGACGAGGGTGATACAGGGGTGAGACGAGGGATACAGGGGTGAGACGTGGGAGACAGGGGT…
CLocus_52771	1	28	27.45	7.67	274	34572	TGCAGCCTGCACGTCTATGGATGCAACCCAAGGTCTACGAGGGGCTGCATTGTCTGCTGGTCTATAACCTTACCCTTGTGAATTGAGACCTTGAGTTGAAAACTATAAATTAACTCTTCAGTTTGAAGACAAAAACTTGCAGAACACAGCATGACAGTATCTATTCATGTTCCTATGGCAACAAGTGCAGAGAGAAAATATTGAGGAGAGGGGCATGAAGGGAAACGATTGCAACACATGTAGTATGGGAGGGAGACCATCACTCACATGAATGATTTGTTTTTCCTAAATACATATTTTTTCTTCTTTCACTACAATCTGAGCTGGAAAATAGCAGCTCTTATTAATGCTGCAATACCTAACTTTTTCGAGGGACGCAACCAAATTCACAGAGAAACG…
CLocus_15655	1	29	27.45	7.67	58	10824	TGCAGTTTGAGTAGTGTGAAGATGTGCAGGTTGGATAGGGGAGGCTTGTTTGTGGAGATGATGGTGCTGTTATTGGATTGGAGAGGATGGGAATGGTGGTAAGCTTTTGCTGGGTTCCTACCCATGTGGGTGTGGAGGGGTAATGAGAAGGCAGATGTGGTGGCTAAGAGTGCTGTGAGGAGAGAGGGGGTAGATATTCAGGTCCCGCTGGGCTGCAGGGAAGTCAAGTCCTTGATCTGGGCAAAATGGCTTGATCTTTGGCAAAGGGAGTGTGATGCTAGTAGTAAGGGGAGGCAATTTTACAGCATGCACCAGTCAGGAAAGGAAGATGTGGGGAGTATGGGATGTAGGACAGAGGAAGTTGTGTGGAGTAGACTACAGTTTGGGTTTGAATGCCAC…
CLocus_28488	1	30	27.45	7.67	86	19366	TGCAGATTTTTGATTGGGACTTTAACCTTCCTTTAAGCTCAATAAAAACTGTCTGTTTCTGGCATGGCTAGTGGAAGTAGGACTCGAGGGAACCACGGCGACGCACGTCGGTAGTCCAGCAGTGGAAGCCTCCTCCCAGGGAGTTGGCGTGGCGGATGTTCACCTTGACGGTCTCTATACCTGGAGAACGGAGGGAGGGAGCGAGGAGGGAGGGAGCGAGGGTGTCAGATAAACCAGAGGAATGGCAGGTGTCAAAAGGTCTGTCTTGGAACTTTATCTCAACTAACTTAGACAAACTAATAAAATCTATCAATCACTAAATAAAGATAAAAGGGCAAGAACTAAATGGTTGAATAAAATACTTATTGGAGGGATTATAATGAATAGGTCATAGGTCAT…
CLocus_19342	1	31	27.45	7.67	173	13292	TGCAGCTCAAACACCTGGTCTATGGGGAGGTGAAGCACACAGCTGTCTGATCTGAGCACAATAGCAGGCTTTGTGTATCAGCTGTCACTCATCACAAAGGTCACATATGACCCAGAGTGGAGACCTTGAGGGCCTAAACCTCTGCATTCTGCGCCCTGCCCTGACTAAAATGGAGACAAAGTGCCCTTTAAACATGAAGTGGTGTTACATCCCGTTTTCTCATCCCAATCTGTTTTGTATTTCAGTTGTAACCAATTGCAATGTTATTTATAATGTTTCAGCTCTCCAGTAGTTGGTAGTTTTGAACCATTTACGTCTTAAGAACATCCAGTGGTGTGGTAAGCCGAGGGTTTCTTTCATGCAGCCTCTTGCTCTCTTTCCCTTGCTCCCTGGGCCTCA…
CLocus_22588	1	32	27.45	7.67	109	15524	TGCAGATGAAGGGAACAAGCAGGGAAGCGGAAGACATTAGAATATTGAGGCGGCTCTAGACACCTGTTGATCTAGCCATACTGTTTATGAATCGTAGTGAGGTTTTGGCTGTAAATTATTTAGTAGGCAGATCGCAAGTCCCGCTACTTGGGGGATGGGTAGAGGGAGAAGTTGTCACAGTGAGTGTAACCTACACGTTAGCTGAAATCTGTCCCAAGCTTGTTCCAATTACATTTATTACATTAAAAAAATATTTATCTTCTCTCAGCTCTTCATAATTGCTGCACTGAACTTTTTAACCTGAGGGAAGTACTAAGAAATATTAAAACCAATTAACTGATTTGGTAATGTGAAAATGGCTTTGGTTAGAACACGTTTGACGCAACATAATTTTTTCCC…
CLocus_41480	1	33	27.45	7.67	64	27524	TGCAGTAAAAGGTTCTCCTCCCAGGAAGCAGTAGAACTAGGTTTTATAATACCTGAATGAAATGAATAACTCACTTTGTTTGGGGAGGAAATGAGGTTATGGCTACCAGACGGATCACTAACCATTCTCACACAGCTTGACAAACTGTGTAGCCTGCCAGACATGCACAGCGAAAAGACTGTACTGGGTCCAGCAAACAGGTTCCATGGTGCTGACAAGGGGAGGGGCTGCACGCTGCAAGGGAGCAGCAAATATAAAACAAACAGACAATTAGACAAATTATTCATGAATAATAGGCTGAGCAGCAGACAGGCTGACCAACCGACAGGCTGATAGATTGAAATCATTTAAATCATCTTGGCCAAAATTTAACCATATAAGGACATGCAACATCTATGC…
CLocus_69003	1	34	27.45	7.67	109	43685	TGCAGTCTGCCTGCCTCAGTCAACGTGCCTCATTGCACTGCACAGCTCCCCACTCCATCTACAGGAGAAGCCAGAGTAATAGGTGACAAAGAGCCTCATCACACACAGCAATGAGAGGGTTCAGCAGAGCAGGGTCCTGGTACAACAACGCAAATCACTCATCTCCAACTGACAGACTGTGGCAGGGGAGAGTGAGGGAAGAAGAGTGACAGGAAATACAGAGGAGAGAACAGAGGAAGTGAGGAAGACGTACAGAGAAGAGAGGTTGTGGGGTGAAGGGCTGTCCCGTGCTGCTGTGGTAAAGGCTTCAGGTAGTGAGTGCATACATTGTTCTACTTTTCCGTACTGGTCCCGTGGGAGTTGTTTCACTTGGACACTAAACATGAATAATGGAGCCAC…
CLocus_283	1	35	27.45	7.67	140	405	TGCAGGGGGGCTAGGGTGGAGTTGTAAAAGAGGTCGGACACGGCCTAGTCAGAGAGCCCCCACCATAACCACGGTGAACAGGCTGGGGGGATGTGAGGAATAGAAGGGTATGAACATGTGAAGCGTAGGAGAAAATGTGAAATAACTATTGGAATATGCCTGTGAAATCCTCCAATCCCTCAACATACTGTTAGGAAAGGCCCATCTCTGAGGGGCAGAAACACATGCTCTCCACATAGCATTTTATGTTGAATTATTTCTCTTCTGATACTTTTCATGTGTAAATCATCCCTTGTAAAAATATACTTCTGATGTACAGTCATTTTTCTGACATTTTCTCATGTAATTCGGGTTTATTTAAAACCAACATATGATTTATATTTTTATTTTAAACATCTA…
CLocus_83533	1	36	27.45	7.67	217	51159	TGCAGGAGATAGATTTAGATGTGCTGTGTTGTGTTTGCGTGTCATGCCATGCTCTTGGGGACCATTGCCTCTATTACACTACTCGGTAATGATGAGAAGATTAAAGATTAAAGCCAAACTGAACCATTCCCTTCCTCTAAGGTGATAGGCCTATGCGGTAATGTTACAGGGCATGTTTGTGTAACATGTCTTTCAATGCTGAATCATATCCGCGGAGCCTACATTTGCATTTGAACATATGTAATACCATTAACGCCTCAAAGGACAGTTTCTAGGAACTATTTGTTACTGAAACAGTTATTTTCATTGTCTGTTGTTGAAATGTTCAAACATGGACATGAAATGGGAGATTAATCTGTCTCCAGAATGTGTAGCTTTTCAATGATGATGTCTACCAGA…
CLocus_51155	1	37	27.45	7.67	23	33496	TGCAGAAACAAAAATAAGAACACCTCAAACAACCTGGACTTTTAAAGACTTTGGTATGAACAAAATGAAGCTCTCAATAAACACAGGCCCTACCGGTACGCCTGGCTGTCCCAATATCCCTTTAAAGAATGTACTTCATTTGCTTATTCCTGTCAAAGTATGAAATATGCATAGTGGTATTCATGTGAAGAAATGAGATTGAAAAGAAATGATCAACCAATGATTAAGAGAATCAAACAATATCCAAATCAGGGGATCTCAAGTTATGACAGGTTCAGAGTGCAATTTCTCAGCAAACAATGACTTGGCCTCCAGAATGAAATCAGAGCAGGGCACAAGAGGGCAAGGGTCACAGAGGGTGAAGAGGTGACCATCTGAACCCTGTGACTGACATGGAAC…
CLocus_4078	1	38	27.45	7.67	54	2946	TGCAGGTCACCGAGGTGGGGAAGGAGTCGAGCGGCAGCCTCTGGACAGAACCCTACACATACCAGCACCGCCCCCGCAGCACCTGGAGGAGAAGGACACCTGAAGGTGATGGAGCGGAAGGGCAGGTGGAGGCAAAGGACGGTTGCCGTGGTTACGCGGGTAAAGGCAGAGAGGAGGGGCAGGAGGAGGGCGTCGCCGGGTACCATGCGGTGCAGGGAGAGCAGGACGCAGCCCAGCAGGTCTCTCTGATATTGTGGCTCCCCGTCAAGCAGAGTGGTGCGGGCCGTAGGTGGTAACGAGGGCTCAGAACGGAACTCCAGCGCCAACCCCCCAGCCTGCTCCTCAAAATCCCCCCAACACGATGCTCTGCCAAAGACTAGGCACTTTCTGTTTCCCTTG…
CLocus_54096	1	39	27.45	7.67	37	35398	TGCAGGGTAATCATGATGTGTCCTAATCAGAAGCAGCAGCAGCCACTGAGGGAGCTGGCAGCAGCAGCTCACCAAGCATCACCCCACAACGGTAACATGCAATTTACAACAATGCTGTTTTCTCTAACCTTCAATAAAACACCTGTTCTTGTTCTGACATTTACAAACAAGCATTAATTGATTTTTTGGGGAGGAGCAGCACGTTGGGGAAGCAGTTAGTTAGGTGTGTGATTGTATAAATAAATACAGATGTTTAGCAGTGACAGGGCAGCCCCCAGGGTTGAGGCTAGGGAGGGGGCAAGGGGGGGAACAGGGGAGGGCTGCTTAATCGAATTTATTGTGATTCATGAGGCCTGCAGT
CLocus_56511	1	40	27.45	7.67	273	36786	TGCAGTGGCGTCTTCTACCACAGGGTGGTGTCAGTCTGACCACTGAGCAGTCAGTCTTAATCCTTCAACACAACACACACAGACAGCCAACGGCCTCAAACAGACACACCAAGAAACACTCTAGTTATAGTCTTCAATTAGGGCCTGGAGATGTTCCTAGTCAGGTCAAGTTAACAGGAATGGAACAGTCGATCATCACCCTGTTCAGTTAGATGTCCAGGAGACTGCCTTTTTAGAGAGCTGAAAGGTATACAGAATAGATACGATACACACACCAGACACTCTCTTTCTAATGTAGTACAGAGACCCAAAGCCTACAGTGGAAAGACATTTCATGGTCCAGCACCAGAACTAAGGCCTAACATCATAACATATCAATATAAACACCAATCCCAGTCT…
CLocus_318	1	41	27.45	7.67	39	464	TGCAGTGGGCGTACAGAATTTACTGCGATGTGGCCTCCGCAGACGTCAGAGCATTCATACTTATTGTGCTACGCAGAGCAGAGCTGTTGTGAAGGAAGTTGTCGAGGAAGTGAGTTTGTGTTTATACAGGACCTTCCGCCCCCCTGCCTACCGTCAACCAATCATGTCAATGCGGAGCTATACGAAGCTATATGGAGCTCTCCGCATTGTTAAACAATCTGGGAGGCGCACGGCGATGCGGTATGGAGCTCGCAAGCCTCCAGATGCTCCACAATTGCATCACACCCTTCTTCCCGAGGCTCCGGACCACATTTCCAGATCAAGCATAAATTGTCTTTAAATGTTCACGCTTGTTACACTGTTAATGAACTGAACGAAGCAACACCTCTGTCCATTATT…
CLocus_80992	1	42	27.45	7.67	120	49752	TGCAGACAGAGGGCTTGTACTAGTTGTGTTAACACTGGGGGGACACAATAATATGCTCGTTGTAAAGCAGGTAGTATCGTCCAGACAAAACCATTATTGTCTCCACATGGTAATGAGGACGGGGAGGGGCACAAAAATAGATTTAGAGGAGGACGGCTGGAGCCTGTTGGAAATGGAAGGAGCGAGGGAGGGATGGAGTAGAGGAGGAGGGATGAGGGAGGAAGGGAGGGGTTTGTTCTCCTGCATCACTGAACACTGAAGAGTTTTCTTAAATCGTCACAATACAAATTAGCTCGGGCCAAAGAAAGGATGCTACTGAAAAACAGATGACAAGCCTGCAAGATTTAAGTCGCTCGCACAATAGTGTCTTCTGTACTAAACCCCCTCCTCATCACCCCT…
CLocus_79	1	43	28.2	7.67	189	74	TGCAGTGTGGTCATTAAAGAACGAGGGATGAAGGGATGAGGGATGGAGGGTTGAGGGATGGAGGGAGGAGGAGGAGGAGGGATTTGATCCCTATTGCTTGGACAGCTGGGGGACATTACATTTTACTACGCTGAAATGACCATCCTCTTCAACCATTAGTGAGGGACACTCCAGGAAGCACCTCCCTGGCCTCAGCCTGTATGTACACTTCACAATTAGCCTGAATTGGATGGAAGTCAGTCAGAGCCAATGAAAAACATTCTCGTTGTTCTGTTCCCCCCTCAGTCAGCACAGCTCAGCTTAGCTTGGTTAATTATTATTGTTTTGGAAATCCACTCCAGTACGGATGTCATGGCAGAAGAGTTTGTTTGAGGGAAGTAGCAGTGTTGTTGTGGGTGT…
CLocus_30026	1	44	28.2	7.67	173	20401	TGCAGGACATTCAGGACCTGTCAATATCAGACGGAGCAGCGGACACCGTCCACACAGAACCTGGGACCGGGACCGGGTCAGAGGAGCACGGCAGTGGGTCAGAGGAGGAGGAGGAGGAAGAGGAGGAGGAGGATGGCGGCGGTTGGATCACCCCTAGCAACATTAAACAGGTTCAGATGGAGACGGGGATCTGGGCGTCGCCTGTGGACGTTAAAGTGGCGTGTCTCACCACCGACTTCGCTATGCAGGTACCGAGGCCCAAACGGACCCCTATTCCCTTGATAGTGCACTACTTCTAACCAGGGCCCATAGGTAGTGCATAAGTAGTACACTATAATAGGGAATTGGGTTGCCATTTGGAACTTAAGATTCTGGTTAAATGAACTCGGAATAGTTCGG…
CLocus_78309	1	45	32.11	7.67	134	48512	TGCAGGCCTTATTTTCAGACAGATACACCCTTCAAAAGATCCCCTATTGAGTTCACCATTTGAGCAGGAAAGGGAGTGAGAAAGGGAGTGAGAGAGGAGAGTGAGTCGGCAGTTTTGCAGCGTGCCCTCTCACACAAGCCTTGTTGTTCCAGCCGGCCCAGGCTGTCAGTGGGCCTGTCTGACCTCTGACCTCCTGTACCTCAGCATGAGGAAGTGGTTAGGCAGCCCAATAACAAGACCTGGTGGAGAGACTGAAACCAGAGCTGAAGTACTTGCTGCCCCTGCTCCCTTTAGTCCAGTTTGTCTTCAGGGCTCCATTCCAATCCAAATATGTCCTCCTTTCCCTCTACTCTTGTTGACTGCCTGTCTGTCACAGATCTAAAAGGCCTGGACATGGTC…
CLocus_81984	1	46	32.11	7.67	103	50208	TGCAGACGAGCCCTGGTCGACAGTCAGGAGACATCAGATACACAGTTAGATCCACAGCTACATATAGCCATAGTACACGGCATATGGTAAATGGGACCATACGGAATGACTTGTAAACATAATCAATCAAGAGCAATGAGAATAAAGGAGCGCTGGAGAAGAAACAGGACAAATATATTACATCTGGTATTTACAAAGAGCACAATAGACCTACAGAACACAATGGAAGTACGCAACAAATCATGAACAATAAAGTGTGTCTAGGGAGTTGTTCCTAGCCACCGTGCTTCTACATCTGCACTGCTTGCTGTCTGGGGTTTTAGGCTGGGTTTCTGTACAGTACACTTTGTGACATCAGCTGATGTAAAAAGGGCTTTATAAATACATTTGATTTGTTTA…
CLocus_54028	1	47	33.25	7.67	31	35378	TGCAGCAGTCAGCCATGGTGGACAGCATGTCCCTGCCTAGCGCCAGACAAGGCGGCTCTGTCCTGATAGAGCGGTGCACAGTGTTCCTGCTCTATCTATCTATAGCCCAATATCTTTCAGTCAGTTTTTCTTACTGCAATAGGACTGCTGAAAAAGATTGGTTTAGTCTGAGGTTTTCTCTGCTCTGTATATCTGATGAATTCCATTGCTCTCTCTTTCTCATTCTCTGCATTTGAGTCTTTCGCTCTCTCTCTCATCAGATCGAGCATAAATTGGCTCTTAAGAACTCCAAAGCTTCTCATTTATAACGGTTATAGACTGTGTTTAATATAATGGAGAAGGGAGGGGTAGAGCCAGCCTGCATTACTGATACTGTTGTATAAGGGCTGAGGCAGTAAA…
CLocus_7764	1	48	33.25	7.67	268	5228	TGCAGGAGACAGAAGGAAGCTTAAACAGCTACGTCTCATAACCTAGGTCAACAGTCTAGAGTATCGGAGGTGCACAACACACCCTGCTGTAAATTAAGGGGAAAATCAGCCACACTATTTGCCCAAGGATCAATGTCTTGTAAGGAGGAATGCAATCATTGAGACAGTCACAGAGAGTGAATCAGCACACATGAACGCTTGCACGCACACACGCACACACAATCAGCTCCCCACCGATAAGGCAGGAATCAAGCAAGTTTTAAGTGTCGTTTGTAGTACATTCAATTACTTTGCTGATGACTCTTGCCAAGTGGAAATCTTTAAATACTAATGCTGTGTTAATCTGGTGCAAAGGGAAGAAGCAGAAAAAAACCAATGGAACACCACGATCAATCGCTA…
CLocus_41084	1	49	33.63	7.95	90	27286	TGCAGTAAACAAAAATACATTTGTTATTGATTTGCTTAATGCATTTTACATTGTGAATGTTTCATCTGGAGTAAATATGTCTGAAAATAGCACAATTACCTCGCTGTTTCTCAGGTTAATGAGTAGAGCTCCCAGCCCGG
CLocus_79725	1	50	34.01	8.23	28	49089	TGCAGTATCTCACGAGAGAGAGTGAGACAGAGAGAGAGGGGAGGAGAAATAGAGAGAGAGAAAGAGGGGAGGGAGAGAGGAAGAAAGAGAGCGAGAGAAAGAGGGGAGGGAGAGAGGAAGAAAGAGAGCGAGAGAAAGAATGACA
CLocus_63378	1	51	34.01	8.23	120	40776	TGCAGAGCGATCATAGCATCCAGGTTCTCTACAGGAGGATAGACATATAGAGGTTAGACAGGTCTCCACAACACCACTCATTCAGTATACAATCTATATTCTCTATTTATACGTTCCACTTTTTCCTTCCTTCTAGCTCT
CLocus_55245	1	52	34.01	8.23	34	36071	TGCAGGTAGGATGATGCAGTCCTGGTGCCACGCAGCCCTAGTGTAAATGAAGTTTTAAGTGAGAATGGCTTGCATCATCTTTAAAGTCAACATAGCTCAGGAAGGTCTAAGCAATAGTCGAACCATTACAAGCCATTTTCACACCAAATGTTTATTATTTTCTTTGGACAGTCTTCATGCGCCAGGTATCCTTTCTACATCAGACATGTCTTTTTTTTTACCCAGCAGCCCCTGAGAAATAATGGATGTGCACGCTGAGTGTTTGTGAGATAGATGGAGGGCGACCTGGCAACTGACTGGGTTTTGTAAGGAGAACTGAAGGCAGACTAATGAATACTGAACACTATGCTCCCAAATTCAGAAAACGTCACAACCTCAACTATTCCATTATTAAATATT…
CLocus_41360	1	53	34.01	8.23	70	27434	TGCAGAGCCCGGGAGATGATGAAAGGCCCCTGGATCAATAAAGGTGAAGTTAGAAGGGAAGGAGTTCATTGGAGAGGCTGGGGACTTGCTCAGTCCTTGGATTATGCTGAGCTCACACACACCATTATGTTCTCCCGATCT
CLocus_12338	1	54	34.01	8.23	156	8444	TGCAGTCGTCCAAAGCTGCATTACTCTGATTGCCAAAGTCCAGTTGTGATGAATACCTCTGTGACATATTGTAATAAAACTATTTCAAATGCACCAGCCCAGTGGGGACCCATAATGCACCAGCACCAACCCAGTGGGGACCCATAATGTTCACCCGCACAATGCTCTTCCGTTAAAATGCTTCTCATTGTCGTAATAGGCCACCTCTGGTTCTTAGAAGTTAACCTGATAGAAAAGTCAGTCTCTTCTCTTCTGTTCTGTTTTATACGTCATTGGCGTAGTACCCACAGCACCCACAAGGCGGTGGGGCCCCACGAGCTCTGGGTTCCCATGCACCCGTCATCTCACACCTATATCTAAATTGTATATATATATTTTTTAATAAATGATTTT
CLocus_108038	1	55	34.01	8.23	121	61645	TGCAGCAATACCTCAACTAGGACTGCTCCTCTCTCCTTCCCTCTCCCTCCTTTTTCTCCCTCTCTCTCTTACACACACATTATCTCCTCTCCTTTACTTCCTCTTTCTCCTCAACCACTCCCTCCCTCTCCGGTCTTTAT
CLocus_699	1	56	34.01	8.23	116	813	TGCAGCTGCAGCCGGTCCTCAAGGTCCTGACAGCGGTCCTCCAGTCCTAGGATCTGTTCCTGCAGCTGGTTCCTCTCCAGCTCCAACTCCTCCACTACCGACCGTAGGCCACCTGCAAGGGCAGTCGCATAGACAAGAAAGAGACAATCAACTCAGTGGTTGAGAAATCTGGTAGTTATCTATCATCATCAACAATAATTAGCGAAAATGGATGCAAATTGTAATCATAGAAACAGCCCTTTATACAGTCACAACTGAAACATTTCCATGCAAACATATTGTTGAGATGGATTACAATGTTTATGATAGTTGGCCTGCTACTTGCCCCATGCAAGGTCACTGGTTTTTGGACATTTATTTATATTTTTTTGTCCCATTAAAAACCATGAACCTTTCAAC…
CLocus_58575	1	57	34.01	8.23	14	38021	TGCAGGCAGCTTGCTTGTAACCACAGACCCGGAGGTGTTGCTGCTTCGCTGCAAACAGAAAACAAAGAGGGCCTGCAACTGACTCCTGTGGGATACCCTTAAACACTTGAGCACATTTGGTTGTTACTACACAAAAAAACAGATAAAAACACATTGTTGGATGGTATGAGTTGTTGCTTATTTATTTCAGGTATGATCCATGTAATCAGGATAACTGATAACACAAAGATAATATTAAACAGATGTAATATTTAAAGGTGTAATCTGCAGTTCAAACAATAACAAAGTGGGACACCGCACCACTGATTTGGTGAATAGCTGAGGGATGAGTCTGGAGAAATGGAACCACTCTCAAATTCATAGACAGAGTTATGGACT
CLocus_45540	1	58	34.01	8.23	80	30141	TGCAGAGCACATCGTGCACTATTTTCTTCAGGACAGAGGTTTTGTCCTCTGGTAGGTGGTCTTTGATGTATTCATCAAGGGTGTATTCACAGAGCTGAAGAACAAGGTAACCAAAGTGCTCGTCCTCTGCAAAGTCCACATATCTCACAATGCAGGGACTATCCAGCTGAGGTAGTCGTAAAAACCCCTCTTCTCTCTTCAGATCTTGGTAGTTTGACTTGAGCATTCTCTTCACAGCTACCTCAGTACCATCATCCTTCAAGCCCAGAAAGACTTCGGTTCCATCACTTCCTTTGGCTATTTGGAAATCCGGATGGACTACAAGATTGAGATTCCCCAATCTGTAAACCTTGGCTGGGTCTATGTTGCTGAGTTCCTCCAACTGAGGCCTCCACCGCT…
CLocus_27523	1	59	34.01	8.23	6	18670	TGCAGGGGGAAAACTGCATTACAGGATGATCAACAAAAGAATGGGCATCAGCGCCCAGAATCCAGGCGCCTCTCTGCCATTGACGACTGAGACATACAGTAGTGACCACAATCTGCTCTGTATGGGATGCGTAGGCCCACATGCTTCCAATCAAATGAAACTCATTGATCCACTTGTCAGATACCCAAGGGGGGGAGAGAGGGAGGGATTGTGAGAGGGAGAGAGAGGGACTGTGGGAGTTCATTCTAGTAGGTTGACGTTTGTCGTCATGAGTCTTGTCCTGGAGGCAGAACTGAGCAACTTCCCTTTAGATAGGCCAGCTGAAAAGTCCACATTGGGTTTGAATTAAGGTTAAGGTTAAAATATAATGACTTTGTGGCTGTGCAGAGCTGCCTCAAG…
CLocus_73249	1	60	34.01	8.23	110	45950	TGCAGCACCTGGCCTCACCCTACTAGAATCTGAAGTCAAATGTTTACTGTTTGCTGATGATCTGGTGCAAGGCTCCAGGCGAGATCAGAGAGTCATACAATGGTGGGCCTGCACTCTGCTCTACCTACACACACACGCACAGACCCTCTCTCTCTCTCTCTCTCACACTCCCATTCACACACACATCTCTTTCACTGGCTACAGCTGAGGGCTTTCTCAAGTGCTCTTCATTAAGCTCCAATGGCTGTGTTTATGCTTCACTCTCCCTCTAAGGACAAATCTCTCCCTCCCTCTTTCTCCCCATCCCTCACTTTCTCTTCCCCTTGAGAATGCATCTCTCACACTCTCCTTCTCAAGATGGACACCCTCTTTCACAGGGTGGTTATAATGTCTCTCTGT…
CLocus_57774	1	61	34.01	8.23	261	37566	TGCAGCATCCAAACCCAATCTGAACCTGATGAAACTACACACTCAGTGTTTTGGCAGTGTTGATTTAACTCTGCTAGAGCAAACACACCTCCATTCACACTGCTGATGAACTGTCTAGCATGGCAGGTATTCAACTGCATTGTCTATCAAACCTGAGAATATATTAGCTAACAATTCACCCGAGTGAGGCCCTCGTTCATGTACTTTATCTGGTTGTCTAAAAGGAACCAATGAACTGAGAGGATGTAGTAATGATGGTGTGTGGCACATGATGTTTTCTTTAGGATGATCATCAGTGAACACTAGTTCCTATAACATATTTAGTGGTAGAATGGGAATGGAATCAAGAAATAGATTAGAAAACAGATCAGAACCAATGCCAGGGGTGTTCAAATCTTA…
CLocus_11527	1	62	34.01	8.23	137	7803	TGCAGACTTGAACAGAACCACTAATTACAGGCTTGCAGCCCAACGCGAGCTGTTTCGCTCTCCATGTTTCACCATTGCTAGGTAACGGCTAATATAAACCATTCCCACGTCTGTGAGAATCACAGCTCCGGCCACTGCGACATAAAGACGGGCTTTGTTCAGACGCCCGTGGGGCAAGGAGAACCTGCTGTCACTTCAGGAACCACCCCACCCACTGACACAACAGACAATGGGCTTAAGGGTGGAGATTTAGGTCCAGATTGACATTCCTATTACACTTCAAAAAAGCCTGTCAGATTTTTCAGACCTCAAAAGTCTTATGTTGAGATGCATATGTCCCAGGCCAGTCAATGTCTCAGCAGGCCAGAATGGGAAAGATATCACCATGTCTTATTCAGA…
CLocus_67699	1	63	34.01	8.23	155	42972	TGCAGCTGCGGTGGGGCTGACACATGCCTGCCACATGAGACAGGCCCAGGGTCTCACATGGCTTATTGATGGCCGTACAGATGTCCTTTCTGAGGAGAGGAGGGAAGGAGAGAAGGAGAGGGGAGGAGGGAGGGAGAGGAAAAGGGAGGAGGGAGGGAGAGGGAAAAGGAGGACGGAGGGAGAGAAGGAGAGGACAGAGGGAGAGAAGGACTGAAACATTGTAATAAGGAGCACAACAATTACCTTCAACATCATCACTTCCTATTCTTGACATGTGTTTAATGTGCTGAATCTATCAAGACCATGACCGGTGGGATGAGTCTCTGTGGAAAAGCTACTTAATTAAAACAATTGCAGAAAAGCACAACTCAGGAGCTCCAACTACCTTCTTTCAAAGGT…
CLocus_35788	1	64	34.01	8.23	14	24055	TGCAGAGGAACCATCAGCTCCTCTACCACCAAGTCCATTAATAACAGCCTGACAGTTTCAGTTGTCTGGAGTAAAGAAGTCATTGAGAGCAAGACAAGAGTCCCTGCCAAGGATTATGCCAATATAGCCTCCTCATTGATCTCCAGCAGACAATCACTCTAGAGGTGCTAACGCAGTCCCTCTCCAGCAGTAAACATGGACGACCATTGGCAGAACAATGTGAACCAGCAGGGCACTGAGATCCCCACCTACGGGGAGGGAGGCGGCCAGGAGTACCCCTACCAGGCTGACTTCCCTCAGCAGGAAGGAGGGGGAGACGAGGATGCCAGGAGCGATGCCACGGAGGGTCACGACGAGGATGCAGAGGCCATGTACGAAGGAGAGTACCAGGGGATCCCC…
CLocus_7572	1	65	34.01	8.23	148	5130	TGCAGCTGAGGAAACTCCATGCGGTGGTGGACTCCCTGGTCAACCACAGAAAGGGTGAGATTCACAGAAAAAAGAGTGATGTCTGCTTTAAAACCCTTTTGATAAGATTGGAGCTTTAAAGCAGATGTTCTTTTTTTATTTGTGACCTTGGTATATCTGTTGTTTCGTCAGAGCTCTGCGGGAACACAGCAGTGTTCGCCAAGAGCATGGCCATGCTGGGCAACTCGGAGGACAACACAGCTCTGTCCCGGGCCCTCTCCCAACTGGCCGAGGTGGAGGACAAGATGGAGACGCTACACCAGGAGCAGGCGGCCAGCGACTTCTTCATCTTGGCCGAGCTGCTGGCCGACTACATCCGCCTACTTGGAGCCGTCAGGGTACGGAAACTTCATTCTACAT…
CLocus_490	1	66	34.01	8.23	50	633	TGCAGCGCTGCAGCCTGACAGGCTAATGGCCTATTACTGACTGAGATGTGGTCAGCAATCCCAGAGAGGAAACAGAGATGGCCGCAGCAACCTCTGACCTGACCACAGGGGTTAGGAGAGAGGAAGAGGGGGAGTGACAGAGAGAGGAATAAGGAGGGTGGGAGATGGAGTGAAAGGTAGATTGATGTAGAGAGAGGTGGAGGTTGGGTGAGAGCGAGAGAGCAGGGAAGAGGGAACGCAGCCAAAAGCAAGGGAAACTATTTGTATGACATGTGGATGGCCCTTGCAGCCACGGTCAGTGTGTAATAAAGTGCAGTTCTGCTCTGAATCATGGCGAGAGAGTTAGTGGGGTGGCAACTACTGAGTGAGGTAACAAACCACAGGAAAGCCCAGTGGAGG…
CLocus_101793	1	67	34.01	8.23	39	59055	TGCAGATCGGGGTTTATTGTATTAGCCTGTAGCATTTTGAAAAGCTTACTGTACGATTCTTAATAACCAAATGGATAGGTGACATGTTTGTTCAATATTTGATCTCATAGGGACCATCTGCATTCTGAATGGTTTTGGCTCGCTTTCTCTCTCTCCCTCCTTTCTTTCTCTTTCAACTGTCAAGTCTCCCTTTTCTATTCTTGAAGAAAGATGCACTGTTTTCCTTTTGTTGACAACTATCTAGTCTGGGTTTTGTCAGTTTATACCCTTGGACTGTAAAGGCAAGGAAACGTTATAAGAAGTTAATGGCTTGACGTAGACCATGAAATGTACACATAATGGGCAACATTTATTTTTTGCGTGATTAGTGTCAGCTTTTATGGCTGGTTTTATTTGGCT…
CLocus_26429	1	68	34.01	8.23	162	17913	TGCAGAGGCAGAAAGACATGGGGACAGAGCGATAAAGGACCTAAGCTTTGCCAGTCAAAGTTGCTAAGACAGGAAACAGGAAGCAGAGTCAGCACCTATCTGTATAATAGAAGTGTCCACCATGACCTTGTCTTGGGGAGGTCAGGCAGTCTGACATAGGGTTTTTATAAATACTCATCCATGATACCAGCTTGATATGAGCTGTCATCATTAGTTCATCTTTCATAGACTCATCATCAATGCCAGAGAGCTAATGCTGCCGCTGATTGGATCCTGGATTTCTCATGTACGTTTGTGGAGCTGATGAACATGCTCAGTAGCACAACACTTAGTGGAACGAGGTCCCTGGTGAATCCATTCACTAAGGAGAGGCTGTCATCCCCTCCCATCCATTCATAT…
CLocus_8340	1	69	34.01	8.23	171	5633	TGCAGGTGGCCCACAAATTCATTTGTTTTACATTTTTCCTTCTCTAAAAATAACAGCTGGGAGTATTATAAGCAATTTAACATTGCTTTTCACAATGTAAAATGTTTATAAATAATAATTTCTTACATTCATTGCTAAAATTAACTAAATTTGACCGCCAACATATAATTTAAAAAAATAAAACTGCACAAATGGTGGTCCTCAAGAGCTTGACAGTGATTTGTTGGTCCCCGGAACAGAAAAGGTTGGGAACCGCTGGTCTAGAACTCTACCTCTATAACTGATGTAGTGTTCGGGCAGTCCTTTGGATGCAGATGAACTTTAGTTCCAAAATAATACTTACAATTACACTGCCAAGGCAGTTGACATTTCTGACTCCTACATACTTTCTTGCAAAAG…
CLocus_16625	1	70	34.01	8.23	237	11454	TGCAGTCTTTACCATACCATTGTCTTTATATGAGTGGACCTGCTAACCTCTGTGACTGGGTCTATTAGTCCAGTACTTCCTAAACCCTATGTAGAGTTGGGATCAATTGTATTTCAATTCAGTAAGTAAACTGGATTTTAGTTTACTACCTAAATTGAGTGAATTGAAAGCAATTGACCCCAGCCCTGATGTCGACCCTATAGCTAAACCCTATATGAACTGAAACATAACCCCTAGTCTGGACAGACTGACAGACACTCGTTGTCATGGTGGAAAGACAGGTTCCGTGATAAGGTTGCCGTGGCTTCCATTGTAGTCCTGAAAAGTTCAGGTGTCAGTTGACGAACGGTCATTACCCACAATGCCTTAGGGCAGAATTAACCCATGTCTGAGCAGGTA…
CLocus_19055	1	71	34.01	8.23	138	13118	TGCAGAAGACCGGCCAGCAGAGCCCAGAACAGGTCCGTCTCAAAACACAGTCACAAACATTTCATAGACATGAATTTGACCAGTTTCTAGAATGAAAGTTTCTCTGACCAAGATGGCCGTCCTGTAGTTGTGTCACCGGGATGCCAATGTCCGTTCTAGTGGTCTGTTTAATTCTGTGGTCAGCACAACACTATGGACATTTAGCAGAGGCTTTTATCCACAGCAATGTGTGTTTTTACATGACATCATTGACACACCGGACAGAGTGATATGATGATGTAGCAGCCAATTGTGTTGTAGCCTAATAAGACTGTCATAAAATGTAGTTGAAACAGAGCTCTCTCCGATCCTGCCAGCCACATCTTCTAGTCTCTCTCTCTGTTCTCTTTTTCAATAGCA…
CLocus_24642	1	72	34.01	8.23	33	16709	TGCAGAGACACAAGACATCATGAGAAAATGAGTTCTGATCAGTCAGGGAGATAAAAGGTCTGGAAATAACATGTTGGCTCGCTATTTAAAAAACAAGATGGAGTAAAATATTGATATAATATAGTCTAAGAAATCTTGCGATATGTGGCTGTATGAATCACTACTTGTTTCCTATCGCAGGGTGGACACCAGCCACCTTTGTTTCATCCAGACAGCAGAAAGCAGGCAGACAGAATGCCAGGCCAGAGGACTTCATGGATGAGGAGGTAGGACCACAAAACATCTCATATTATCTGATCAACAACAGTATGCATGAAAGCACTGATCACACTAACTACTTCCCTTTCAACTCACGTCACGGATGAGGAGGAACCTAGAATCTGAAAGAGAACACAGTAT…
CLocus_29990	1	73	34.01	8.23	109	20365	TGCAGCATTGACCTGCTAGTGTAGTGGAGTTTGATGTATCCCTGTGTGGCTCTGTGAGGATGTTTGTTTGATAGATCCTCTGCTGCTGTGCCCTTGCCTTAGCCCTGCCCTGTCTGGCTTCTCCATGCCGGGACCCCACTTGGCAGGTCATCACTGATGGAGAGACCAGGGATGATCCATCCTGAGACCAGGAACTACAGGGGACAGAGATGGTTTGGGGACGGACTGAGAGAAGGGCAAGGGGGGGACGTATGTTTCTTAAGGTATCCTAAGGGGGAAAAGGAGGGGGGTCATCAATTCCAGTATATCCGTTGTCGTTCGACCCTCCTCAGAGATTGAATATGGGTTAGAAGGAGAGAGCAGTGTCATGTTCCTGGTGAATTTGACACAATCTGAATG…
CLocus_10799	1	74	34.01	8.23	87	7245	TGCAGACGACAAGAGACACGATCAACTACACATGCAACACTTGTACTACTGATTGTTACACTATTGTGATCATATAGGCTAACGTCGTTAGAGAGAGTCAGACCCAAGACCCCAAAAATCTTGGAGAAGAGGACATATTGTGAGCAATTTGAAATAAGCATTATACACATTTGATGGCCTTTCAGATGGACATATACTGTTATTCAAACAGAGCTGAAAGGGACAAACACATAGTGGCAGACTGACACATTGATTGAAGTGGATAAATCAGTAATAACAATAATAAAACATGTTTTAAATTAAATATTATAAACTGGGTGGTTCGAGCCCTGAATGCTGATTGGCTGACAGCCGTGGTATATCAGACATTATAAACTGGGTGGATCGAGCCCTGAATGC…
CLocus_9767	1	75	34.01	8.23	67	6608	TGCAGTGAGCCATTTAAATCAAATGCTTTATAAAAAGGTATTTAAGTAGGCCTAGCTAGCAGCAGTGGAAAAAAAGAGAAGTGGTAGTGCGATACTTTCCCATGACAATATTCACGTCCCTCTCCAATTAAAACAATGACTCACCAGGCAGATTGGGACAAGAAAACCAATGTTTCCTGGCTACTGAGGGACAGACAGAAAGGCAGACTACTGACAACTGATAAAGATTGCATTACCACATACAGTTGAAGTCAGAAGTTTACATACACCAGCCAAATACATTTAAACTCAGTTTTTCACAATTCCTGACATTTAATCCTAGTAAAAAATCCCTGTCTTAGGTCAGTTAGGATCACCACTTTATTTTAAGAACGTAAAATGTCAGAATAATAGTAGAGA…
CLocus_58254	1	76	34.01	8.23	284	37864	TGCAGTGCCAGGCTGCCTGACCCCGGGGTGGCAGAGGAATGCCACGGAGCCTGTCCTTTCCCCATGTCCTGCTGTACCCTTCCCCTCCGTCTCAGTACCTGCATCACCATATTCGTCTTCCTGTATTCTCTCAATTCCTCCCTTCTCGCTCACTTAAATGACAGAACCACAGGTAGCAGTGCAAGGACACAGAATGCATTGATAATGTAATCATTTTCATCTGGCATATCATTTTTCGATACATCAGCATTTAAGTATCTGTCTAAATGTATTTCATCCAGGTCTGAGTTGACTCGGTACTGCTTGACACACAGGCATGTTTGACCTATTGACTAGAATGGGATCAGTGTTCTCTTCTGCTTTTAATGCATTTTTTTATTTTTTTATTTCTGGGTCAGT…
CLocus_60608	1	77	34.01	8.23	40	39161	TGCAGTAGACATACAGTGAGCAATATGTTTGGAACATCACATAGCAATTAAATGGCAGTACAGAATCACCACACACGGTATGGTGATAATATGGTATGGTGAGGTCCCTCAGTATGGTGATAATATGGTATGGTGAGGTCCCTCAGTAAT
CLocus_66720	1	78	34.01	8.23	169	42489	TGCAGGTCGGGCCAGCGCCACAGGCGGCAGTAGATGACGTGGGGGAGGCCCTTCCTGTGTGGACACCTGTAACCGTCCATCCAGGGACCTGGCAGAGACAGAGAGAGGTTTGTTTTGTTGTTACTGCTTTGGAGTTATAAGTTCATCAACTGTTTTGCCTTTTGGCACATTGCTTGAATAGTTTGCTGTTCTTCAAAATGGCCAAGCAGACCAACTCCAAAAAGGTAAGTTCACAATCTCACGACTGCGAGTGTACAGAGAAGATCACACCCCATACACTGAGTATAGGCAAAAACATTTCACCTTGAGAGCTAAACACTTTAAAGCGCCCCCACCCCCACCCACAATTATATAGAAGAGTGTGCAATTTTATACACTACATGAAATGTGTTTCCATGG…
CLocus_24674	1	79	34.01	8.23	28	16726	TGCAGCCTGTGAAAGCCTCAAACTCACCATAGAAAATATCACCCAACAGAAACAGGCATTTTCGTGTCAGCTTGAGTCCCTGAAAGACTCGCAGACGGATGAGTTGTCGGAGTGGAAATCTAAGCACACAGAGCTGAATTTACAGGAGTATGAGTCACTTTTACAAGCGTACGAGAATGTCAGTAGCGAAATGGACAAGATGAGACAACTATTGGAGGGGGCAAGAAGAGAGAGACAAGAAGCGCTCTTTAAAGCACACAAATCTGAATCTGAGAGGGAGAATCTTGAGAAGCAAGTTGGGGAGATGGAGGATGAAAATGAGAAAATTAAAGAGAAGATGAGAAAGTTTACTAAGGCAAAGCAGCAGAAAATGGAAGAGCTGGAGGAGGAGAATAAAAA…
CLocus_22189	1	80	34.01	8.23	132	15247	TGCAGAAAAAGGGAAAATATAAAGTATTTAATGGACATGGTACAGTTCCGGGCATTAAAAAGTAAGTTTTCCCGAAGGTATCTTTTTGGTCTACTACCTTTATAGCCTTTGTATTCAGAATGATGATTGAACGTTACAGCAAAGCAATATTTGAATGGTTATTGATCATTTAGGTTATCTGAACTGTAGCTAATGTGCTTGTGACACATAGTCCAAGATTCAATCAGATCAGCTACCTGCGTAGCTGATGTTTTGATGGTGTACGAGGTGTAACTGCATCTGCTAGCAGCTGGTCTTGATCATTATCATGACGAAAGTGAAGGTGTAGGCTAAATAGAAATAATGACGCTCAAATTGAAAATCATGAAACAAAATAAGGAGGATTTCTATCAGCCTAAT…
CLocus_104152	1	81	34.01	8.23	306	60083	TGCAGTGTAATAGTGGACGACACTGCCCTCTTCTGGCAAAGAATGATTGTACATTATTGTATGTATTTTCCCACTAAGAAACAGCATGCCCCACACTGATAAAGCCAGCTGAGATTGTTTCTATGAAAACGATCTAGAAGTATCTATGCCTCTCAATCTCACTTCTCCCTCCTCCTCCAAGCTTGGCTTCTTCCAGAGGCAGAAGAGGAGAGAAGAGGATGAGCAGGAGACCAATGGAAAGGTGGCAGAGGAGCGGTAACTAACGCAGGCGAGGGACCAGCCATCACACACACACAGGGGACCCAAAACTCAGGGACTGCCCCATCCCCCCCGACACTACAGTGGTACAGTCCAGAAGGCTCTGCAAGATGAGACCGTCAGATCAAGACCTGCTCAGTG…
CLocus_30019	1	82	35.92	8.23	274	20398	TGCAGTGATGAAAGGTTGCCAGCTTGAGAAACCCACCAATCATCCAGGCATGTTCTGGCAACGTGACTGTGGTTTGTGGTTATGGAGACTGTTCAATAGAAATCTGAAGAATCGACACGTGGCTTGACATTTTCTCTCTGCATTCCTTTTACAGTAGAGGCAGATTATAGTAGCGTATAATTGTCCTTTTGAGAGTTTATGACATTAAGGTTCTATCTGCTTTTGAGTCTAAATGTAGTTATTGACATTTAGCCTTGTTATGTTCAATGTTCTCTCCCTATATAGTACTCTAAATTACCTAGTTCATGTTGTTAAGTTCAAAAGAATACAATATAAAAATACCTGACACCATTCAAACCAATGACAGTTCGACACATTAAAGCCAATTATCTCAGAATC…
CLocus_2904	1	83	35.92	8.23	47	2205	TGCAGGAAATGGCTACAAAAAAACATAAAACATTAAGTTGTAAAATACTGAACTACCACTTTAAGGAAGGTAGGAAGAGAATATATTAATTATAATATAAATTCTCAACATTCAAGGAAACAGTAAAACAAGGGTGAGAAACAGGAAACATGATGATTTATGTTGGTCACGGTTGTTTTGGTTTCAAACCTTTCACATGTGATTCATTATGAATATATTGTTTAATAAAGACAGATCTAACCTGAGAAATTAATCTCCAACCATTATGCTAGATCCTCATCGAATTAGCCATGAAATCTATACTTTTACTGGGTTTAAGTGTGTACTGTGTACTCACCTTCCTTTTACTATGTCGTTGCTTTGTATTCACTGTTACACAGTAGCTCTTCCAGATGGTCG…
CLocus_138506	1	84	35.92	8.23	158	70551	TGCAGGAGCCATTGACAATCAAAAACCCTTTTCATCACCTGAAGAGAAATGTTGATGCTTCCCCACCTCATTTAGAAAGCATTGAAGACTAACAGTGTCAGACACATTTCAGTCTTAAAGCACATTCATTCAAGCTGTAATTCACAGTTGAATTACCTAGTGTGTATACTAGAGTGAAGCTAATGTGACCAAAGGGCTGAAATTGTATGAAATGTCCTCTGAATCATGTACATGCATTAAAAACATCTTGATGTCTATTATAAAAAAAATCTTATTAAACCTGGAGGTTTTTTTTTATACCTCAAATCGTTTTAAAATACTAATGTCACACAGAGAGAGAGAGACATCTGGTTCAGGTGTCACAAACAAACTGACAGTGATAACAGCCCTAAGATGGCC…
CLocus_85742	1	85	35.92	8.23	200	52242	TGCAGGCACTGAAATCAGTACAGCAGCCAAATCACCTCTAATAGGCTAATGGTTACAGACTGGAGCCTGTCCCTCTCTCCTCCTTCTCCCCTCTCACTCCAGGCATACAGACATACTGTCATTTAACTTAGCTACAGTAGATTTAGAAATTAATAAGGAGAAAGTTGATCTAATTCTGTAAGATTCATAATTTAAATTTTAAAAAATTCCACATACTCCTTTTCCTGAAGCAGAATTTCCAAGATCAATCTATTGAACAACATACATCTATTGGACTATTGGAAGAGACAGTATAAATAACAAACTGACAATCCGCTGTAAAAACAACACCTGCATACATTTGTTAGTCAAATTGCATTTGTTAGTCAAATTGCATTATCATCAATGTCTGTTTGTAAA…
CLocus_38513	1	86	35.92	8.23	342	25759	TGCAGATGGTGGTGTAGATGAGGCTGGGTCTAATCATGCTATGGATGGTGGTGTAGATGAGGCTGGGTCTAGTCATGCTATAGAGGGTGGTGTAGCTGAGGCTGGATCTAGTCATGCTATAGAGGGTGGTGTGGATGAGGCTGGGTCTAGTCAGGTTATGCTAGTGGATGAGGAGAGTATAGTGGGGAAGGGTAAGAGACTAGGGAGGGTGGAGGAGGGTGTCAGGCAGAAGAGGAAAAAGGGGGAGAAGAAAGGAGTTGGGAGGGGAGAGGCCGGTGTGGTCAAAGGCACCAAGGAACCTTTGCCTGGTGCTGTTGGGGGAGGCCCCGACCTGAGAAAAAGGGCAGGTGGTCAGGATGGGAGATGGAGATGAGGAGGCCTTATTTTCAGACTCCTCCT…
CLocus_60844	1	87	35.92	8.23	261	39313	TGCAGTATCTATCTTTCAGACTACTCTGCTATGGTGGGGGGCTGGTCATGTTCTTTGTGAAAGCCTTCCACTGTACAGCCATGTTGTGTTATCACCCTTATTACTAAGACAAGCAGCACTAGTTTAATTCTCTCAAAGCTCTCTTCAGTCCTTGACTGGGGTACTGAGTGTAAACTAGCAGTGTCATTAACACTGCATAAATAGCTATAATTACTATTTGCAGTAATTGTTACTACTTCACACAACTCCTGGAACGTCTTCAATTTTGAGTATGACAATTCAGTTTCCTGTGTCTAAGATAGTAGCTTCAGGAAATGAGTTGACTGTCAGACACTGCTCTTGTAGTGGTTTATGTATGTTATTGGACACGCCACCTAGCTGGGATGGAGAGCTGATGTC…
CLocus_17461	1	88	35.92	8.23	102	11992	TGCAGAGGCTGTCATGAAAATGTCTTCATATTCACTGATGAGTCACATTTTGGTGTCTTACAAACATCCAGGAAAACACATTGAGCTCTGTAACTTATCTTTCCATTAGTTTACATAACAACTCTAAGACCTGGGGCAGGATAGGGCTTTCCCTTGTGTGTGGTGTGGTTGTGGCTCGAGGTAGAACATACCCTTATGCACAGATTTAGGATCAGAATATTCCACCCCCATCCTAACTTTACCATAAGGTAACGTGTCTGATCCAGGATCAGTGGTGTTAGCAATTTATGTTACTCTTCAATAACACAAACCCCAAAGCAAATCAGGGGGAGGAAAATAGGTTTATTCAAAGAGGACAAATCATAGATGTTATGCTGAGAGGTAGATGGTCATTCTCCC…
CLocus_39988	1	89	35.92	8.23	127	26673	TGCAGTGAGACATGAGCTGGGATAGTCATATCACAGTCATACAATCTACCATCTCACATCCGCACACTGAGTTTAGCACAGAAGTACACCGAACATTTAGCAGGAAACCCTTGGCAAAAAGCCAAAAACAAGTAGTGGTT
CLocus_6786	1	90	35.92	8.23	513	4654	TGCAGCAGGTTCCCATCCTGGCCCCACTAGCCTCTCCTCTGCTGCCCTGCTGCTGGCCACCCTGCTCTGTCTCTGACCGTCTGGACCATGACTGGCCCATCCTCTATAATGTAGCTCACCACAGGTAACTAACCAAGAAGATTGTCTCATCTCTGCCCTGACAACTGTTAATGTATTCATTGCAGGCTCCAGAGTAAAATATATCAAAAGTCCTTTTGGTGAGTGATGGAATGCCTGTTTCCCAGCTCTGCAGTACATAGCCACCCACTGTATCAGCCTCTCAATCCACTCTTTGTCCTGCTCCCTTTCATTCAGTGCAGTGTTATACCCCCAACCCTGTCTATGTTCTTAAACTGCCATCACCCTAATCTGTCACCACGAACATGACGTTGACATGAC…
CLocus_4354	1	91	35.92	8.23	137	3150	TGCAGCCGTCACTCCTCCCTGCCCGCTTCTCACATTAAATTTTTACCCTCATTTTTCAGCTCGCCACCGAGCGAGAAAGCGAGGGAAAGAGCGACAGAGCGAAAAAATGAGTGACCGAAAAAACGAACGAGTGCCAAGTTCTAGGGAGCTGTTTCATTTGTGTCAAACCTCGACGGCGCTCGATAGTCATTGGTCGGTGGCTGGGGCGGCCATCCCTCACTGTAATGAAGCCTATTGATGTTTGTAGGGCTTTGATTTCCCCCTGGCGAAATACGATACACAACGCTGCTAACTGCTAACTGAGTCAAAACAGCACCCACAGCTACCACCTCTCTCTCTGTTCGCTAAGCTAGCACCCTGCTCTAACAAGAACGGTGAAAACCAGATGACTAAAGTCTT…
CLocus_91390	1	92	35.92	8.23	75	54851	TGCAGACTTAAACATAATGACATGAAAGGTGCCAAGTGCCAAACCAGTCTGACGGGAGAAATGGCACGGGAAATTAAATAATAGAAACTCACAAAAGCACAGAAGAAGAAGATGTAGTTTTAATGGAGGCTCTGACCGTCAATTTGACCTGCGGTGGAAATGTGACATCACAAGGTGAGAATAGCTTTTTGTTTGGATAGATATAATGACAGGTCTCACTCTCTTCCTCCTCTTCCTTCCTCACTCTCTTCCTTTTAGCTGTCCCTCTCTCTCTCTTTCACTATCCCTTTGTCCAGAGTAATTACACGGGTTTAGATTTGATCTGAGAGAAAACGGCCCGTGTGTGTGTGGGGGGGGGGACATTAACTCCGTGTGAGTCACCAGACACTGGGTCATTAA…
CLocus_44707	1	93	35.92	8.23	103	29633	TGCAGACATGTTGAATCATTTGGAGCAGATATTTAACCAACGTGGACAAACTTTTAGAGAATTTACTGAAACTTTGTATCTGCACAGTTCTTCCACTAAATTAGTTTTTGTAAAATGTTCAGTGTAAATTGGTCAAAGTAGTCATTGTGCATAGAGGTGTATGGTTTAAACTTTTAAATCAATGGTTTGTTTTGGCATACATTTTAAGTGACAGAATGTAGTTACAGTGGAATTGCCCACAAGTAATTAGAGGCCTCTGCTGTATCAGATGTGAGTTTTGACAGTATGGATTGCCTGCGAAGGTCGACAGTTTATCTTCCACGTCCTCCTCCCTATCGCTGAATTTATATGCGTTTAAGTAAATAAGTGTCTGTCTGTTCCACTATGAGTCGGTGAGAG…
CLocus_44197	1	94	35.92	8.23	339	29317	TGCAGAAACAACAATGCCCACATGGTTTTCTTCTCTGTAATGAAGTATGTATTCCAGTGCAACAGTGGTGCTGTGTTCTCTGTATTCATTACAGTGGGTTTTTGTTTCAGGACAATAACCACCAGCCAGCAGCTTTAACACATTGTGCTGTATGATTAGTGTGAGGAAGTGCCAGGTGTAAACTGACAGCAGAATGTGATGTAGGCGTTGTTGTCTGTACAATCACATCTCTCTGGATATTGTTTTTATTGCACATCAGTAATAAGCTATGTTTACTAAATTGTTGTACACTGTATAAACAGAGGCAATAGTACACTTGAAATCGTTGTCCTCATTGTTGTCTTTGTAATCAATTTGGTTCCTCAGTCAGGCCCTGTTTTGAGAGACCGACAGCACACA…
CLocus_29961	1	95	35.92	8.23	214	20347	TGCAGTCAATATATTGTTTGGTCTTTCGTGTCATGCTTCCAAAGCCTGTCACTAGCCCCAGCCAGTTTTGTAAATGATTGCCTATTAAGCATAGACCCAAATAAACAGTCCAACAGCAAAGGCACACATGTTCCAGCTTGATCAGTTTAAGGCTATGCAATAGCATGATTGTGAGAAAGCTAAAGATCTGACAGCTAAGGGTGGTATGTATGGCTTCAGATCCAGGCTTCACCGAACCAACCTAGAGGTTGACATGGAGAGGAACAGTCAGATCAGGGGAAGGATGTTCCAGGAGTGTAGAGGTGATGTGGAAGGTAGACGAGTTGTTGGTATCCAAGACTAATTGGCTTGATGTCCAGCCATTTGGGTCACCATCCCTCGGCTGGGCTTGAACAGTCC…
CLocus_44369	1	96	35.92	8.23	84	29414	TGCAGGCGCGTTTAGGGTCATGACATATTGTGTGGATGAAGGGCGGGTGGGTTGAATAAAGAGAAAACAATACCTTAAAAAAATATATATATAATTCTTGTGCAATTTATATCAACAGGCTACACTGGTTCTCTTTCATTATTTTAGGCTGTCAGCCTGAGCTTTAGGGCCCAACTGTACGCGCGTCAAATCGCCTACACGCCAATCACAAAATGCTTTAGGGAACAGGCAGAGAAGGTTGGGAGTTTAATTCAGTAAGAGAAAAGCTGCGAAATGGAAAGCTGAAAATAAAGAGAAGCGAGGGACAGAAAAGTAATGTTTGGGAAAGCATTGGTGACATGGTAAGAGGATGATAGCAGTGTTCTGTGTGATGGCTCTGTACAAATTTGACAGTCACAA…
CLocus_92914	1	97	35.92	8.23	138	55505	TGCAGCTGAGCACAGTTATAGTTGGTAACAGGCAGTCTGTGCTGTCACTCTGAGACACACACACCTGCTGGTCTAAGTTTGGAATGTGGGTTGCCGTGGTGCCTTATTGAGTCTGAATAATGGATGAACAATGCTCGGGGAG
CLocus_8938	1	98	35.92	8.23	124	6028	TGCAGTGTTCCCCACTAACCCAGTTAGAGCTGGAGAAATTACAGCTCCATGTCTGGATCCCACGCTAGTGTTCTGTTCAGGGTTGGGGTCCATTCAGGAAGTGATTTCAATTGTGGGAGAAAAAAAATCTTCTACTTCTCTGTTTAATTTAGAAGTAATGGAAAATAGGGGTCCATTTTTATTATTGAATTGGAATATCAATTTACTTCCTTAATCAGCCCAACCCTGATTCTGTTCTACCACTTCTAATACTGTTGTTACTTGCTACATGCTTAGTCATTTCATAAAAGGTTATGTTGTGCCATTTTAATCTGTTATTTACAATGTTCTAACAGTTTATTTCAAGTTAATATATGAACACTAACCTCACTAAATAGGTTATAAATAGGCTGTACTGTA…
CLocus_36832	1	99	35.92	8.23	30	24683	TGCAGTGTTCTGTATAGTCAGTGTGTAACTCAGCACATTTCACTGCCCTGCAAAAACATAACAACATCACAATGACTTTGCGGAGACAATGGAACCACCAACCAAACACATCTACAGGTCGAAATGGAACAAACACCCACAAAACACAAACCTTTTAACCACAGAAATTGAATACTAGTTAAATTGCAGTGGTCTGATGGGCAATGTCCTTTCTAGTAATTCTGTGTCTACGCGTTTAAACTTATCTTGCACTGATTACACATCTGTGGCGCATATGTATTATGATTCAAAGATAATATCATGGCGCCAAGCGTATTGCATACTGGCGCTACCTAGCCTGAGCACCTGTATGTTTCACTACAACAGATACAAACTACCTATCAAACACCTGTCTATCAA…
CLocus_117483	1	100	35.92	8.23	47	65020	TGCAGCTGGTCTGGGCCACCACTAGTCGTGTGGGGTGTGCAGTGCACGTGTGTCCCAGGATGAACGTGTGGGGGGAGATCTGGGAGAATGCTGTTTACCTCGTCTGTAACTACTCCCCCAAGTAAGACCAACTCACTAACGTTACTCTCATTTCCCCACTCATTCACACATCACATCTCCAGTGTTCTATTTTACATACTTCTTACCACCACATGGGGTGTTTACCTAATACCAAATGCTTTTGAGGGCACATGTCAGGGTATGAATTTGTCTGTCTAATGTTACAGTTAAAGTGTCTGTCTAAGAAGTATTTCATGACACATTGAAGCAAATTCTGAAATTCCAGCAGAAGTTCAAATACAAAAATAATAAAGGAAAGGGAAAGAGAAACAGGTCCTA…
CLocus_3732	1	101	35.92	8.23	62	2734	TGCAGTGTTGTAATTTAATTTAATTTGTGTTTTTTAGTCACTGTCGGAGAGTAGTTGCAACGGTCTGCGAAAAATTGGAGCATGGTGTGTGTGTATGCTGCAATCCTTGTGTGAGTAATGGCGTGGCACTTCTGTTGCTTGGTCACTGACGTCCTTTCTGGTCTCATTATAAAATGTTTAAAGAACTTAAACCATGACGTAGTCAGTGGTCCAGTTGGGGATTTGGCTTTACCAGATTGTTTATATAACTGACAGTTTTCTATTCAATTTCCATTATAGTACATCTAATTTTTATGTGAAGGTGAGTGGTTCAGTGTAACCCATAGTCTCGGGTGGGATCTATTCTGATGGGTCGTATTCCTTAGCCACGGAACAGAACAACACAGACTAAAACATCGA…
CLocus_12840	1	102	44.79	8.23	132	8769	TGCAGGACTCCTCATTGATTCTCCCTCCGATCCTCATCCCCCTTGTTCCAGATAACTCCCAACTTTTTATTTTGCCACAGCAAATCTCTGTCTCTATTGATCCCAAGATAAGTGTCTTTCAAAGTTATTTCATTGGGATGGTTGGAGGGGGACATAAAACAGCAACTTCTTTGATGAATTACATCAAATCATCCTTTATAAATATTTATTTGTCGGCTACTTTTGTGTCATTGGAGTAATGGAAGTGCTGATGTGGACACTTGAATGGCTCCCTCCTCTTCCTCCTCTTCCTCCTCTCCCCCAGGCCTTTTACTGTTTAGACTGCTGTTGGCACTGCCTGGAGAAATGACAAACAGGAGTGAGATTGTTGATGAGTGTTTATCACACCATAACCAAGTG…
CLocus_110112	1	103	44.79	8.23	121	62475	TGCAGCTCTATCTGCTGCTGTCTATCAGAAAGGAGAGGGCAGAGGACGAGAGGGAGAGGGAGAGGGAGAGGGAGAGGGAGAGGAGAGGGAGAGGAGAGGGAGAGGAGAGGAGAGGAGAGGAGAGGAGAGGAGAGGAGAGGNNNNNNNNNNGAGGAGGGACAGGGAGAGGGAGAGGGAGAGAGAGACAGAGATCCTCTCTAGATAAGATGAATCACTGTACGTACAGTCCTCTGACTCATTGTTATGTAACTTCCTTCATACATTCAAACCAGATGCAGAGGAGGGAGAGAGGAAGGAAGCTGCATTTAAATAGAGATTCAAGCCTGTCTCCAAAATGACTCCTTATTCCCTATATAGTGTGTTACTTTAGCCCAGGGCCATATGTAGGGATTAGAGTGC…
CLocus_8539	1	104	44.79	8.23	39	5770	TGCAGGCGCTCAGAGCTCACTACTGGCTCATATCAGCAGAGCCAGTAGCAGCAATACATACCACAGTAGTTACACATGGAAAGATACCGGTGCAGAAGTCTTGCATGCCAAGATGTCTGTTTAAGACTGTTAGAGAAACAGCTGGTGGACATTTAAGAGACAGGTGCATTTAATTAGAAATAGGCTTTCTGTACATGCACACTTCTCAATATAACCCGGTTCATCCCCACCAAGGCGGACCTGCGATTCAAATCCACACCACAACGACATAACATACTCCAAAAGCCAAGGCATGTCTTGGTCCGGGCCGACAGTGCTTCCAGGAGGAGTGATGCCATTCGCAAAGTTTTGTTTTGGCCCATAATCTCTCAAATAACACCAAAGTGTTTTGCAGCTCTA…
CLocus_27514	1	105	44.79	8.23	245	18665	TGCAGGGCCTTGGTGTGGACCGTGACGGCCTCCAGGTACTGTTGGCAGCCCTCAAAGCTCCGTCTATTGTCTATGCTGTAGACCACAAGGAAGGCACTGGCCCACGAGAGGTAGCGCTCACAGTTCACTGGGCCGTCCTGACGGTAGAGACAGACAAGGGGAAAAGGTCATCACTTCAAAACAATTTGTGGCAAAGGCTTTAGAAGAAGTATCAATTTATTTCGAATAGATCTTCAAATGGTATTCATTTGCACAGAGAATCTGTCATTGTGGCCCGGCTCTTGTAATGGTAATGCCCCACACGTCTTCAGGTTTGAGTCCGACCTACTGCCCTTTGACACAAACTCTATCTTTCCTCACTATCATCCTCTGTCTCTTTCAAAAAAGACTATTCCCACC…
CLocus_20989	1	106	44.79	8.23	38	14410	TGCAGACTAAAAACAGTTGCATGCATTTGTGAATTGCAGTTTATTTATTGTTTAGGCTAATGATTCAAAGCTCCCTTTGTTATTTAATTAAATCTAAAATGCTTGATTGCATTTCAAAGCATGAATGTCTCGTATGCTGTTTGATGGTATGAATAAATTAATTGATTGATACAGTAGCCTATATATTGAAATATAGGCCTAAGTAAGTTACATTATTAAGACTAGACAGGACGCGCTCTTAGGCCTACAGCTCGATGGTGGTTATACAAGGATACTATACAAAGACCACTAATGATAATGACATTACTTATTATTATAATGATTATCATAATAATAATTGTAATAATAACAATAAGATGGAGATCAAGAAAAGGGAGGGTATGGGAGCGAGAGCTGGGT…
CLocus_35819	1	107	44.79	8.23	204	24072	TGCAGTTGAATTTATTCGTTTGCGACCAATTTCAGCTATTTCCAGTCTGTTTAGAGGAGACCTTTCACAAATGTTCCAATTGAATGGAAGCTAAAATGGCAATTAGTCCACAATAGCCTATGGCAATGATATTACTGTGGAACCATTACATCTGTGGACTGCTGCTTCAGGGAAAGGAAATAGCAACATTGTGATAAATGTCTGGCGTATCTCTATCGCCATCATTGAGCGTCTGCTTGTCAAGTCATTTCCGTAGCCCATTAGGCGTGTTGATGACATGTAGCATTGTCTAACTGTTCACTTTATTCATATCACAAACGGTGACATGTCACGTATCAGTAATAATGTTTCGGGGGAAACATTCCGTAAAGTAACTAGTTTGGTGAGGAAGGATTTTGA…
CLocus_23679	1	108	44.79	8.23	102	16131	TGCAGTTATTAATACTGATGTTATTGCTTTGTTAACCTGTTATTAATACTGTTATTGTTTTGTTATACCATGTTATTAATGTGTTATAATCGTTATGTCACATATATGATTCCAGATGGAGCAGATCAAGAGGACTAACAAGCTGTTCAGTAACGACTGTATCTTCCTGCGTAACACCCTCAACATCCCTGTGGTCTCAGAGACCTCTCCCTTCAACGGCCTGTCTCTAGAGTCCCCCGACGGAGATCCCCAGCACCAGGACTACAACCCCCTGTGTGTGGGGCAGGACAGGGACACTGAGGAGGGCCCCTCGCCGCCTCCGGCCCCTGGGCCTGGGGATAAGGACAGTAGTAGTTATAAACGGCCCCAGCCAGAAGAGCTGTCGGCTCAAGACTTCCT…
CLocus_83602	1	109	44.79	8.23	107	51201	TGCAGGGTGGAGGAGTTTGGGCTGGGGCCAGCCTAGAGAGAGGCTTCTAATTAAAGCATCATCATGATCAACTTGTGGTCAGTGATCGTCCCCAATGCTGGCTCTCCAAGATGAACATGGAATCACTGAGGCTTTCCTTGAAGCCTGTGTTGGACTGAATTAGAAAGGGAGAAACAAAACGGAGGAGAAAAGTGCTACAGAGCACTTTTTCTCTTGGCAGGCAGAGAAAGACCTTCTGCCATATCCACTCAAGTTTAAACAATTACCCGACATCATAAGAAACCAGAAGAACCTTAGTCTGGAATAGTCATCACTTTTGCCTGGCCTAGCTCGGTTTCAGGCATGGCGTAGCAAGCGTCACATGTTGGAGCTCTCGATAATTTAAATTAGTGTAATAGG…
CLocus_99737	1	110	44.79	8.23	163	58198	TGCAGTGAGGTGGGGAGGTGGGCCAGCCCTTGTATCACAAGAGAGATGTCACATTGTTCCTCTATGCTACCCTGTGTTTTAGGATGGTATTGAGCTGCAGGAGCGAAACACGGATGGCTTTGACAATACCATGGAGGCATTACTCCCAACTCTGGTAAGCGACAACGCAACACACACCATCTATTAATTTCACCGCATTCATAACTTAGAGCCATACATAGTCATACAGGTGATAATTATTCACACAGTCCCTAGAATACAGAAAAGCTTGTGTGTGTTTCCCACAGCACCAGCAGAGGACATATGATTATGTTCTAGTTGCTGACAAAGTTGAGGACCAAGAACACCCAAAGTTTCTGAAGCAGATAGCTTTTATTGACCACCTGAGGAAGAAAAACA…
CLocus_48709	1	111	44.79	8.23	15	32094	TGCAGGCGTTGATTCTCCTCCTTTGAACGAGAAATCTCATCCTGGTACTCGGCAAACGCGTTTTCCACTGCCACCGATATCTCTACGGCCACTGTTGTTAATCGGTTGGAGAAAAACGCTTGCAACAACTGTAACTTGGCCATTTTTTGTGGAATGACGGTCGAGGGAGATTCGTTCAAGTAACACTTCCTGGGAGGAACTGCGTCTAGAACCACAGAGTAAGAGCTGACTGTGTTCATTGGCTGAAAAGAGCTAAACATAAATTGTGTTACCGCCACCTGGTGCTTGTACTGGAGGAGCGCACGTGAACCAACCCAATTCTGTGCGCAAACATTTTAACAAATACAGTACAGCCTGAGTTGCCATGTCCGAGGTTTTCCTGGAAGTTTGGCTACAATT…
CLocus_43747	1	112	45.07	8.51	16	29086	TGCAGAGAATCCAGATGAGAGAGAAGGAGATGCAGGAGCTGAGACAGGCTGTGGACTATCTGAAGGTGAGTGTTGGAATAATCTACATTATATATACAGTGAAGGCACAAAACATTAGGAACACCTGCTCTTTCCATGACATAGACTGACCAAGTGAATCCAGGTGAAATCTATGATCCCTTATTGATGTCACCTGTTAAATTCCATTCAATCAGTGTAGATAAAGGGGAGGAAACAGGTTAAAGAAGGATTTTTAAGCCTTGAGACAATTGCGATATGGATTGTGGGAAGGAGAGTACAGGAGAAGATGGCGGAAACTGAGGTTTTGTTTGAAACTGCTAGTGAGTCAGGTAAAGATAATAGCACAGAGAGTGAGAACAAGTGTGTTACCGTGGTGAA…
CLocus_16172	1	113	45.07	8.51	169	11184	TGCAGTGTGGAGCGACTGGGCCTGCTGCCCCTGTGTGCTCTGCTCATACAAGGGAATTTCACTGGAGTTCAGAGAGTGGTCACCTCCTCGTGAGATAACACAGCATCCATACATACATAGCCACACACAGCCTCACACAGAAACTCCAACATATACACAGCAGGGCATGGGGCCCAATGTGAGAATATCACTGAGAATAAGCTATTATAACAATACTTCACTTCCAAAACACTTAAGTTGTATTACTGTATTTGTTCTTGTAGGTAACGTTATAGTGCAACTAAAGCGGTTACTTTAATATAATAAGAACAATAACATCACGTTGAAGTGACTATTGAAATGCAAAATATAATATTTGTGCGATTTACTTTGTTATTTTGTAATTGGAGACATTTTTTC…
CLocus_69391	1	114	45.07	8.51	62	43843	TGCAGTGGCAACACTAGACCATGTCCAATGTACTGTATGTAATGTTCTCTGACTCCATGGGTATGATTCGCCTAGAACTCTGCTTCACCACACATTGCATGCAATGTTGAGTGGGTGAGAAACGTTGCTTGCGGCCATTCCAGAGAAGGATTTACATAACTCTGAATAAATGGTACAGATAACATTAAGGACAATGACAATATGGGCTGAATGAATACAATACTCAGAAAACCAGGCATAGGTCAAAACATCTCACTTGCTCACGAAACCAAACCAAAAACATTCCCTGGACATTAGGTCAAATTCCCATTAAAATTCCCTATATCAGTGTGTGGGTATGCCTTTCAAATACTTAATATTCCAGTCACATATTATATCATAACACTAGCAGCATTGATG…
CLocus_121159	1	115	45.07	8.51	202	66080	TGCAGACAGCACTGTATGGCAAGATGGGGCGGGTCAGCTGCCCTCACCCCATAGGCCTCAGGAAGTACTTACCCATGCAGGATGGGGCCACCGCCACCTTTGACCTCTTCGAGCCCATGGGGGACCACCGGACAGGAGGTGGGCTAGTTCAATCATTTATGGATCATTTATCAAGAATGGAGAATCTCTGTTGGCCTAGGACTCTCTTTTTGCAATATAAACAGTCAACAACAAAAACATCCCCCTCAATTGAGATGTGCTTGCCTTACCTTTTCTATGCCTAGATTTAACTGTTTGAGAATGCATTGTCATTTACAGCAATGACCAAGGAGAGAAGTGCAATGGGAAGGAAAGCTGTTGAATGAGCTCATTGGAAGCATGAGAGTAAATTCATCATAG…
CLocus_124447	1	116	45.07	8.51	101	67160	TGCAGGGAAGTCAAGTCCTTGATCTGGGCAAAATGGCTTGATCTTTGGCAAAGGGAGTGTGATGCTAGTAGTAAGGGGAGGCAATTTTACAGCATGCACCAGTCAGGAAAGGAAGATGTGGGGAGTATGGGATGTAGGACAGAGGAAGTTGTGTGGAGTAGACTACAGTTTGGGTTTGAATGCCACGTTGTGGATGATAGAGAGACATGAAACAGGTCTGTGTGATGAGTGTTTAGTGGAGGAAACGGTGGTGCAGGTGTTGATATTTTGTAGACTGTATGACGTAGATAGGGAGAGATTGTGTGAAAGGGTTAGAGGCTGGCTGGGTTGCTGTAGTGGACGGAGGAAAGTGGTGTCTAGGGCTCTATTTCACTTTCTTAGAGGAACATGAATAATGAA…
CLocus_78089	1	117	45.07	8.51	79	48389	TGCAGCAGAAGATGGAGTAGGCACGAGACAACTCATCTGCCTGCCTGATCCCCCAGCCCATCCCTTGGCTCAGGAATGGTACACCCCGCTCTCACTCACATAGTCCTGTCTGTTGCTGTCCCGCACACCTGCTGAGGTTGACTGTGGAAACATTGCTTTTGGTCCAACCCTGACTCCTGTGTCCAAAACATGTGGTGGTGGCCACCTCAACTTTGTGCTCTACAAAGGACTAACTGGCCTCTGCTCATCCTCGGGTTTGTTCTCCCATTTTTGTTAAATGTTGCTTGCCTGTAAAACGATTTAAGAAAGGATACAGAAAACATCAGGCATCTGTCTTTAATATTGTTTTAATCACAATGGTTCTCACAAGTTCAAGCTACACTTCCCTCCTTTGTATGT…
CLocus_33219	1	118	45.07	8.51	344	22511	TGCAGCTCCATCTCAGTGACAGCTGGTAGAGACACGCTGACGGATCAGAGCCTCAACCAGTGTTATAATGAAGCTAGAGTACACACACTGAGGGACATGTACAAATGAGTCTGGAGATCTCTCTCTCTTGATTATTTCCCTCTCCCTCTCCCTCTCTCTCTTTATCCTCACTTCTCTCACTCTTCCCTTCTCTCTCCCTTCTTCTCCCTCTCTCTCCCTCTCCTCTCGCTCCCTTTCTTCTTCTCCTCTATCTCCATCTCCCTCTCTCCCCCTCTCTCTCCCTCTCCCTGTTCTTCCTCTCTCTCTGGACTCAGATATTACAGTTCTTTTTGACAGATAGATCTGTGGGTGCTCATGCCTCCATATTAAAGTAGCTGCTAGTGCAGGTGAGGCTGCGTC…
CLocus_34173	1	119	45.63	8.51	73	23094	TGCAGTTATTCTATTTATTGTTGCCAATGTTAATAGTATCTTCTGATTGGAATCTATTAGCATGCAACATATAAGTAGGTTTATATACAGCTGTCCGATAACAAGTTCTGATGGAATGACTTGACCTGCACTTTGTAAAAACCACGAGTGGATGTTCCTTTCTAAACATAGCAGTGTGAATGCAAAGAGGACTGACCTAAAAAAAAATAAAGTGAACTGGCAAAAGAGTTGTCCTAATTCAATGTCAAGGGCAGTGTGAATACAGAGAACAGCTATTTTCCCCCCAAAAAATCCCCCTCAAGAGTTCACTTTAAAAGAACTGATCTCAGTCCTCTGAAGAGGACTGAAAACACCCTCAGAGGATCCATCTCATTATCTAGAAGAGGATGGGCCTTCAGA…
CLocus_52100	1	120	45.63	8.51	23	34103	TGCAGATGTTCTCATCTGAAAGGTTTTTTGGACCTAAAATTACAGAAAATTGAAAAACTTTGATGCAAAAACACACTTGACTGAACTATTTACATGTAAAATACAAAGTAGAAGCAAATCATTTGGTACTGTAGATATTTTCAACTGATAGACACTTGTTTACAATTGAGTAGAGAAGCAGTTTCTCGTCAAAGCGTCTGTTTGCTTGGTGATGGATGGGTCCCGAGGTTGGCAGAGGTGTGTTGGAGTGCACGATGCTACGTCGGGATTATGCAAACACCCGAGGCACTGTATGCAAATATAGCGCATCTACAGTTAGTTCACAGGTGTTTTTATTAAATAGGTTGTTGAGTGTGTCTCAAAGATAGACCTTCAAATATAGTGGCTAACCTCTGTTCC…
CLocus_55983	1	121	45.63	8.51	22	36499	TGCAGTGCCTCAGACCGCTGCACTACTCGGGAGGCCCCCCTCTGTCAATTTTGAGGGTAGAACAGAGTATACTGTCAATAGATCATACTGTAAGAATACTATAATATGTTTAGTGAATTTACATGCATTACAATATGTAATTTACNNNNNNNNNNAATTTACTGTAAATGTAATGGTAAAGCATAGTGCATATCCTGCACACTTACCGGTTTTCTTGTCAAAATGCTCTCATGATCAAATTGACAGTTGATATTTTCAGACTGGGGTGAACTAATCTGGCAGCCTCTGCCATGGTAAGGCCTCTGTTTACCATATGGTCAACAACGATGGCTCGGACTTCACTAGACAACATTTCTCTCCCATCTTCCACCATCTCTTTGATGTCCACCTCTATGACTG…
CLocus_73003	1	122	45.63	8.51	130	45832	TGCAGTGTGTACTTATGGCTTTGTGATGGCTCTCACACTCTCTCGCCTGAGCAATGCTGATGGCACTGGCAGGAACTTCGGTATGAGAGGCCTGCTTCGAGGTCCACTTCCGCCTAAAACAAACATTCTTGCATCTGTCAAGTCATTTAAGAGTGACTTTCTCAGAGCCAGTGGAGGCGGCTGTTAAGTGACCGAGCCTGCTCTGTTTGAGTGGGGAGAAGACTAATGTTCTCTCCCTGTCTTTTTAAATGTGGTTTAGTGAACTGTAGGCTAGATGAGTCCCGTGACACGTGTGGCCTTCCTAAAGCAAAATGGACAACACTATCGTTTTCATGGGAGTCTCCCCTTTCCATAGTGGGGTCATATTAGTTTGTATCTCAAACAGTCCGGACGCTACAG…
CLocus_33082	1	123	45.63	8.51	220	22432	TGCAGGGAGGTGGAGGGAAGGAAGGGACGGGAACTGAACTGTGGGCGTTGGTTTTTCTGAGACAAACGTTTACACACAAACTCTCTATGATTGGGAGCGAAACGAGGTTTAAGTATAATCTTTTTGCTGCGTCTCTGCCCTAAACAATCCTGGAAATCTCAGGCCTTGAGTCCTTTGAAGCGGAGCTGTGTGACCTCACTGTGTTTACGGGTTTATTGACGAACGTAAACTAAGTGAGGGGTGCAAAATGGCGGATATGCATCTCAATGGAACTGCCTTCCTGGTTTAAATACAGGTGGGGTAGAAGTGATCAAAGTCATACTGTGAATGACTGCTTCCAGACATCAACACCTCTATTTCAGTCAGCGGTGAGGTTTTCTGACTAAGAGCTTCCTGTTG…
CLocus_64751	1	124	45.63	8.79	65	41468	TGCAGCTGCAGCAATAGAGCACCAGCCTCTCTCCCTCGCGCAGCAGTACTCAGGTTAAAAACTTTAAAAAATATATTATAATAATGAATATCTGACAAAAACTATTCTAATAGTGAAATTATTAGTGTTCAACATCAGGCCCATTGGGTTTCCCGAGTATGAACCATACAGACCTGGTTCAGCCCAACCCTCCTGACAGATGTCTATTCTCCCTCATTAACATCTGCACCACTGCAACACACTATCTCTCTCCCTCTATTTCTTACTATCTCTCACAAACAGAGCAAAATCCATTATCTGTTAACTGCCATTTCCACATGCAGCAACCGAGCTCATATAATCATTAATCATGAAGCAGGGAAGCAGGCAGGGAGACAATATAGTCGGCCATTGTTGTCC…
CLocus_80125	1	125	45.63	8.79	126	49314	TGCAGCATCACGGAGAGCACCACCCCGAATATGAGCAGTCCTTTCTGCTGGGAGGAACTCTCTTTGTTGCTGATTTGAACTGTGATGAACCACACAAGTGAAGACAGCAGCAGAGAACACAACCAGAAGAACGCCCTGGGGGAGAGAAAAAAAACACGAGTTTAACACAAGGTATAAAAACACAAACAAAACCAGGTTCGTCACACACACACACACTGAAATGGCCAGAGTTTAGGATTGGATGAACTTGTCTCCAAATAGTATTTCTTAGACACATAGTACTGCTGTGTACAAAATAGACACTGGTCAACACACACTCAACATAATACATACGTAGCAAGGTACCCGTCATACACATTGTACACTTCTCATATAGCCACATACATAATATTTGGCGAA…
CLocus_63398	1	126	45.63	8.79	7	40806	TGCAGCCGCTGGCATGAAGGGAGGGAGGCTGAGCAGCGAGCAAACAGCACAAGCCTCAGAGTAACCAACAGCAGTACATACAGACACAGCCACTGACTATGAGGTTAGGAGAGGAGAGAATGAAAGGATGGATGGACAGACAGGTGTCACATTAAGCCTTTCGTCTGCCAGTACCTGTTAATAGTTTCATCCTGAATGCTGTCAGCACAGCAGGGCCATCTTCTTCAGAGGAGAGACACAGGACAAAGGGGTTAGTCTGCTTAACAAAGTGCTGCTGGACATTGATAGATGCTTTTATGATATCATAGATACACAAATTCTGAATTAGAATATCTAGAGTAGCACCCACCACAGACACAGACACACTAGCCTCAAACAAAAAGGCCATGTGTTAAATAT…
CLocus_10739	1	127	45.63	8.79	147	7204	TGCAGCGGTGTTCACAGGCAGCAGCTAATGGATCAAGAAATAAAGAAGACAGGAAATAGCAGACTGGTTCAGGATTCTTCCTCTGATGGTGAAGATGCTCTGGCAACAACTGAGCTGGATAACGGAGACGGATCAATACTCTCCATCTGCCAACACTGGCCCATTCACATTGGGCTGCCCCATGCCAGGTGGGTTACAGCAGTGGTTTGGGGTGGATGAACCAACAAATGTTTTAAGAGCATATTGCTTCAGACAACATAAAACGTGAAGCTATTTTGGGGTTAAGTGGAAGCACAACTTCTTGTTTATATCGACTTGTTTGTGCTTGTGCCTGAATGTAGACAGATACATTAATAAAGTATAATGAGCCCCATTGCGTGCATTACCTTGCCCAGAAAG…
CLocus_77053	1	128	45.63	8.79	13	47916	TGCAGCAACACACTCTAGTGTCATTGGCTTTTCTGTCATGTCTTGTGTTAGGCCTCACTATATCTGATGTTTTGGTTTTAAATCAGTCAGCTCTGCTCTGGGGGCCTTTCCGCTCTGCCGCCCTCCAATCCCATCTTTAAGTCAAGTCTCCTTGTTCAGCTGCTGATGACAGCATTAATTTTGGCTGTGTGGCAGTATAGTACATTAGCTTCATCCCATCAGCGTGTTTCAGTGTGCTAGGCCAGGCGACGGTGTGCAGACCTAGCATGCCCCCATCACTTCACTCACAGAACAAGTTCTCCACAAATTGCTTTTACCCTTGTCACCTCGCCACACACACACACCAACCCCTGCAACATGGGGCCTACTTTTTGGGCCCTCAGGTTGTATTTAATCATG…
CLocus_83727	1	129	45.63	8.79	266	51266	TGCAGGCTACTGTCCACATAGAGAGTGGTATATCGCATAGGAAGATGCTGAAATGAAGGGCACTCAATAATAATGTTGACGCTCTGCTTTAGCCCTTGAGACTTATAGTTAGCCCTTCATGTTGATACCCTATATAGCCTGTAAATAAATCTGTATTTACGTATGCTTATCTCTTGTTTATATGGGTTTTCCATCTTTCTACGTATGTGGTGTGTAGGCCTATTTTTGTGTGTAGGCTTGTTTCTACGTGTGTAAACTTGCACATAACTGTCCAGCCATTCGCTCAACATGGGCTTTTTTAGGTAGCTTTTGAGCTACCCAGCCCCAATCCATCCAGCCCCGGCTCTATTCCATCCAGCCCCGGCCCAGGGGGAGCCCTCTGGAGAGCAGCCTGATGGG…
CLocus_21744	1	130	45.63	8.79	286	14993	TGCAGTACATCTTCGGGGAGTTCAGCCCTGATGAGATCAATCAGTTCTTCGTGACTCCACGATGTTATGTTGAGGTAAGACAATGAGTTTTGAATGAAACATTTATTCACATACGTTTGCTCCAGCTCATAGNNCTGTTTACAATTATGCACCATATAGTCTACGGTGTTAAGTGTTGGAGTGCCGGTGGCTCTTAATGTTAACTGGGTCGTTCTTAACCTCTCTGGGATAGGTGGGAAATTAGCGTCCCACCTGGCCAAAATCCAGTGAAAATGCAGAGCACCAAATTCAAATAAATTACTATAAAAATGTAACTTTCATGAAATCACACATGCAATACATAAAATTAAAGCTACACTTGTTGTGAATCCAGCCAACGTCTCAGATTTCAAAAAGGCT…
CLocus_14159	1	131	46.19	8.79	111	9818	TGCAGTTCCATGCCCTCATCTAACCCTCCCTCTCTATAAATGCTCCCTCAGCACGGCAGTCTGTCTGTCTAATTGTTTCATTATCATCTTTCTGTGATCCAGAGGAGGGCCTCATCAGGCCTCTTTAATCAGACTAATCCCCTCCTGTCTCTGGGATGGTGCTGGGCTCTGGCCCCTGGTCCTCTGGTTCTCTGCTCCTCCAGTCTGGAGATAAGAGGATTTGGTGTACTTGTCTCAGAGCAGAGGAGCCCATAAGGGGCTCTCCATTGGGCCGGCTCTGCCCTGCTCTGTCGTGCCATCAATTGCTACTGATGTAGACAGAGAGAGAAATAGCTTTGGTTTGTTATGGATGCCGATGAGGGAAAAACACATACGCTTACATAACGCACAGTCACGCAC…
CLocus_77874	1	132	46.19	8.79	250	48320	TGCAGCTAGGAATGGTCTCCATGTGTGTTGGTTCATCTCTAAAGCACAGTTCAGCCTTTCTTAACTCAGGGCTGTAATTCCCAGTTCAATATGCCTGGGCTTATCATATAAGAACACCAGCCTTGATCTAGTTGGAAGGTTAATACATTTATATTACAGCTGTAATCTTACTTTGGGTGTGATTTTATAGTATTACAGCCTTGGTGCTGAGGTTAATATGATATAAAATGTTGGGAGTCTGGGTGGATGCAGCCGGATCTGTCTCAGTCAGGATGATTATTCTACCACAACAGATCTGTCTTTTAAAGGGTCATTATAGGAAGCCATCCACCTTGGTCTACCCTCATCATCACCATCACCAGACGTTATAGATAGGAGAATGTGGATGAGTGTGGATGG…
CLocus_10027	1	133	46.19	8.79	11	6756	TGCAGTGCTGCCCCTTGTCGTTGCAACTTGCAGCAGTCCAGCAAAGTCAAGTAACTTTAACTAGTCTTGCCAGTCCAAAAATTAAACCTTTTTATATATGTCCCCGGCCCATTCCAGTGAGGTGCTCGCAGCCGAGTCTGTGGCTTGCCTGAATAAAGCTCTCTGCCACCTGAAGGACATCTGGGAAGAGATAGGAATACCAGAAGACCAGAGGCTACAGAGAACCAATGTGGTCAAGAATCACATCAAGGTGAGTCAGAACAAATTGACACTCAAGCATAGAGTGTAATTATTCTCCAAGAAACAACATTATCAAAGCCGTGACACCTGTCTGTGCACCTGCTGTAGCACCCGCTCCAGCAGGTATATCTCTCTCGTCACCCCCAAAACCAATTCTTC…
CLocus_85498	1	134	46.19	8.79	216	52132	TGCAGCTCCATCTGCTGGCAATCCAAGGGTCAGCAAAGAGGGGAAGGAAGAGAGAGAGAGTCAAACAGAGAGAGAGGAAAAGAGAGAGCAGCGAGAGGTAAACAAAGGGTGGGAGAGAATGAATCAGTTACTATACCACAGTCCCAACTTGTATAACATCCCATCACAAATGCTAAACATCCCACTTCCCAGGTGCATCTGGGAAAAACCCCTGATCTCACACGACACATATTCACATTTCGAGGCTTCACAGCACAGCTCCACAGAGTTCCATAGAGTTTCACAGCTCCACACACCCAGCTGGCAACAAGTATGCCTGGGACATAAACAATCTTTTCTGTCTTACCCTCATTTCCCTTCGGAGGACCCAGTTGGACGTCTAATAATGAGTTAATCAGG…
CLocus_36211	1	135	46.19	8.79	87	24281	TGCAGAACACTTGGTTTTGGTGCATTTTTCTTCTCTCTCCCTTTCTCACTCACTTTTTATACAAACTCTCATTCCTGCTCTCATTCCCGCCCTCTGCCCTCTCTCCCCTTTGCTACTTCCCTCTCTTCCCTGTTCTTTACCTTGACTTTCTCTTTCCTCCCCCTCTTTTTTTACCTTCAACTTGAATAATGAGAATATTTCAGTTCTGGGCAATGATTTCCACTAATAGTCTGGGCATCACAGCACACGTTAAACCTATAATTTTGTAGCTACAGCTCTTGTTTATCTTCCGAATAAACTGTCATTTATTTCTCCCCTCCCCCGCTTTGTTTGTGGCAGTTCAAGATAATTCTCTTTATTTAGCAGTCAGGAAAGCAACTGGCTGTGCCGTGCTGTGGC…
CLocus_12172	1	136	46.19	8.79	18	8288	TGCAGAGGAATCAAAGAGAAGATGACGTTGAATTAACACCCTCTTATTAATCAAGCACATCTTGACATTCAATTAGGAATTCAAATATTGAAACTAAGGCCCAGGAGTAAAGAGTTGAAGTTACTCTGCTTATTCCCTTTTCTCTCTTTGACTTAGTTGTCTTTCCTTCCTTTCAGAGACAAACAAAAGTCCCCCCAAAAACCATGGACATATGAACAGAAAGTTGTCAGCTTCAGTTGGCTTGGGCCCAGATGGTCACTTATTGAATAAATATGTAGATCTGGGGTTGCAGCTTGTGTTGCCAAATGTGTTAAGGAGTGTGTTGTTCTGACTCTGGGAGTTAGCTCCTCTCCCTTTCCATCATCTGTTCCTCTGACAGCCAGTGGAGTAAAGAAAGAA…
CLocus_46064	1	137	46.19	8.79	10	30445	TGCAGAAGCGTTAGTGGTGAGTGATTTGCTTTCTCATGCACCGTCATACCATTGTGTACCTTAGACTTGACAAATTAAGTTTTTAAAATGCCAAGAAAAAGTATGTTCATAGCAGTAAGCCAGACTTTGATGAGTGGAGATTGGTTTGTCTCTTATAAATGACTGAATATGACCATGTCCATGTTATTGTTTAGCTCATCTTTAGAATATCTTATTGTTACCAGGTTATTTTCCTGCATGATTAGCATAATTGACCACCATTATTTCACCCATAATCAAAAGCAATATGTGATGCATTAAGTGCATTACCTCAGCATGGTCAGTTATGAGATGAGCAGCTATTGGTTGATGAATGACGGAGGCCCATCCCTGCTCTTTACGCTTTAATAAGCACCATCT…
CLocus_62904	1	138	46.19	8.79	95	40597	TGCAGTGACCCACTTCCCTCCGCCCGCCCACAGACTCCTCTCTCCCTCTGTCTGATGTGGGAGTGCCCCGAGGGAGTCTGTGACCTGCCGCTGAACCCCGGCTAAGCCTTGCCTAGCCACTGAGCTATTTTTGGAGCGACTCGCCTTGTGTGTTTACACTGGTTTTGTTCGGGGTTTGAGTGCCAGAAAGAAGCAGGGAGGGGAGAAGAACACAGGGCCAGGCCCGGGATAGTGAGAGAGACAAGAGAGGATAGAGAGAGGGAGAAGAAGAGAGAGGACAGAGATATCAGGAGGGAAAGGGAGGAAGATATAGAGAGACCACACAGACCAGGCCAGTCGCCCGCTTTCCTCAGCTTAGACGGGCTGCTGGGATAATATCCTTTTCATTTAGCGTGCAAA…
CLocus_31149	1	139	46.19	8.79	53	21195	TGCAGTCAGTGGAAACAATAGTGTCAATTCAGCCAGTGGAGGCTCGTGGGAGGAGCTATAGGAGGATGGGGTCGCTGTAATGGCTGGAATGGAATACAATACAACAGGCCAACAATACAGTAGCTATCACAATACAGTGGCCAAACTCAGAGTAATGACACCCCTTTTCAACTGACAAAGATGATGTACTGCTAACCCAGGGATAGACTCTCCTATTTACAGTAAAGCAATCTCACCATAAGACATCTCTACTGTATACGACCTCACAACTAAATCCCAGGGAGAACCTCTGAAATATTGTTGTGCTTTAGTTTTGTTCTAGGGCTTAGGGGTAAAGTAGCTGGTGCCTTGGTTTACTTGAGGGGTTTGTTGCTACTGTAAATTAACTATGGCAAGAAG…
CLocus_33352	1	140	46.19	8.79	40	22590	TGCAGTGACCGAAGAGGAACACAAACACACACACACGCAATGCTCTGCTTCCCTGTGCCAGAACTCCATCACCACTCAGCCCCATGCCCCGCTCTAAGGATCTGTTTTCCTTCACTCCTGCCCCCTCTCCCTGCCCTCCTCTAACCCAGGGGCATTGTGGGCCACAGCAGACCACCTTTCTCTAATAGACGGAGGCACAACTCAAAGATTACGGAGGACAAATTAGAGAGATAGAGAAGGAGAGAGCGATAGAAAGGAGGAAAGAGAGAAGAATAGAGAAAGAGAGAAGGAGAGAAAGAGAGGGTGAGAAGGAGAGAGAGAGAGCGAGAGAGAAAAGAGAGAGAGAGAGAAAGAGAGAGAGGGTGAGAAGGAGAGAGATAGAGGAGGAGAGAGAGGGTG…
CLocus_38552	1	141	46.19	8.79	174	25806	TGCAGGGCATGGTTCTACTTGTGTCCCAGCCATCTAACCATTTACCCTGCTCTGTGTAAGACTGTCTACAACTCCCTCTATAACAGCACGCAAAATGACATTAGTANNNNNNTTCTTTGAGACAGACAGACCATCAGGNCTCGGTTACCAGCACTCAGTGTTTGTAAGCGTCAGATCTGAGACGACACAGCAATATCAATAAAATACCTAATTTCAACCTTAACACGAACAACTGTACTTCTTTCAACCTACACTGTGGTGGGTATCAACTGTGTACTGAATAATGAAAGGTAATTATGTAGCTATACAAACCCCACAGTAATGGGCCTTTGTTTTATTTTTGTAACTTGAAATGAAAATACATTTTGTGGCTGAGCAGCATGTCTGTCTGTGTTCTTT…
CLocus_56812	1	142	46.19	8.79	157	36940	TGCAGATAATGGTATTTTCCCCACCGTATATCTATGACGTAAAGCTCTGTAACAAATGTATCATTATGTGACATTATGTTGCTAGATGGTGGTGTCATGGCGCATCATATACTGACAGCTAACATGGCTTCTACTTAGATATGGATAGAGAACTTTATGATCAAATTCTCTCACTGGTAGTTGGGGTATAGCACATCTTGGGCATTATCACCATGCAGTACAGTCTACTAAGTAAGAAAGTCTGAGAGGAGACGTAGGCGTTTGTGGACATCTTGGACCATATATAAATGGGTCTTGGACCATAGTCTGTATGACATTTGTTAATAATGTTGAAAGGCCTCAATATTAGGATCACCTCATTCATTGCCTCCATCACACTCTATCTACACATGGCAGCAG…
CLocus_10030	1	143	46.19	8.79	199	6761	TGCAGAGCTGTGACTGGGAAAATGGTAGGTGCAAAATGCTTTGAGATTTAATCCATACAAACTGTGCCACACATCATCAAAATGACCAATCAGACGACCCATATTTAGACTCTTTGGATTTGTTTGTACTGAAGTTTAATGTCATAAGATCTAAAATAAGCCACAACACAAGTCTGGTATGAACATCAACTGTTCGTTCAATTTGAAATAGTTAGACGTAAAATGTCCCTCCCTGATTGGTTTCACCTGTCTTTCTGCTTGTCTCCACCCCCTCCAGGTGTCACCCATCTTCCCCATTATCCCCTGGGTATTTATACCTGTGTTTTCTGACTGTATGTTGCTAGTTCGTCTTGTTTGTGAAGTCAACCAGCATTTTTGTATCAGCTCCTGCTTTTCACC…
CLocus_50655	1	144	46.19	9.36	221	33210	TGCAGTGTTGAGAGTATTTTTATGCACTCTGTAGGTAGGTAGTTACACCATATCCCATCCCTGCCCCCAGCAGTATTTCAATAATTGAAAACCCCATATTACCAGGCTCTCCTTGTGATTTAGGGTTATGATTAGAGACTAGCCTGTCTGACTCAATGAATGCTGTGGTCCTCTCCTATGCAACAAGCAGGTTTGTTGAAGTGACCAGTCCTTCCTCAACAACAACGTTTTGCAATAAGGCCCCTGAGTTTGACAGTGCTCTTGCTGTTGTGACACAATATAGATTTAGAGTAGATCCATACCGCAAGATGCTCTCTCACTGCTGATTTCTGATTGCTGAAGTCATCTCTAGTGTGTGTTTCTATACCAGCAAGCCGTCCCAATTCATTTGTTTTGTGA…
CLocus_114188	1	145	46.19	9.36	189	63984	TGCAGGAGCAGGGACGTAGCGCTGAGGGGCACGGGCGGGCGGCGGGTGGGCGAAAGCCCAGCGACTGGCATTATCCATCATATTGACCATGGCAATAATACGGTGTGTAGGCCTATCTCGGGGGGAAAAAAGCGATTAAGAGCGTCTCTCAATATTATTATAGTGTTCATATGCCTCAAGCAGTGGTAAATTAGTCTATTGTTTTTCACAATTTCAATTACACGTTGGCGTCTTTTATCTTGGCTTTGGAGTGACACTTCACTTTCCTCAAAGTCTGCACATTTTGGGTTGCCTACTAGTTGTAATCCAGGATTCCAGGAATGATCATCCAAATGTTTAACTATTTAGGAAACTAACGGCGACGCTGTCTAATAGCCACACATTCGTACACTGAAATGT…
CLocus_20763	1	146	46.19	9.36	176	14281	TGCAGGACAGTGACATGTAGGCTAGTGTGAACAGACCAGCCCGGCTAGCAGACAACAGAGGGGGGCGGGGGTCTGGGGATATGTTGGGGCATGTTCCAAAAAGTGATCTCTACTTTCTCTGGAGACCGTTAGCAGTGATACTGGCTCTGTTCATCATCTGTGGGTGCTTTCGTTCCATGTGATGCAAAGCCTGTGTGAGCATTGTGAGCTAGATGAAAGAACGAACGCCTCGCACACCAGAGAGAAGTGGCGTTAAAATGGTAAGATGTAGATAGCATTTTGTTTCATTTCAGTGTTGATGTAATTTACAGATTTGCCTACCTGTGAATAAAGCGGGAGCTCTACTCAAATCAAAGTAGTCATGCTTTAACTCACTGGTTGGCAGAACAATAACATACC…
CLocus_34837	1	147	46.19	9.36	119	23481	TGCAGTTGCCTCAAAGCAGCTGCAAGGCTTAACATTGTCAAAAAGGGTTTTTATTTCTCTCCTGTTTTGACCTCCTGTGTATATTTTATTGAGCTGTTCTCATCCCACGGGAGTGCGAGTCGGCCATAAGCTACGTTCAAAATGTATTTCAGAGCTCATTAACACGGAAAGCGCATGCCTGATCATACAATGTCCTTTTCAGAGACACTGGTGAACAGTAGGTGCGGCTACACTGCTGAACCAAGCTCAGAATCTTTGTTTTAGGGCAGTTAATTAACTAACAGAGCTTCAGATAGAGTGTATCCTTACAGAGTGTGTGAACGCACCACAAATTATCTATCCCACAGTTCACAAATATGAGGGTCTTTTGTATTAGTTGACTCGAATTTGGCAATTTCT…
CLocus_65696	1	148	46.19	9.36	50	41969	TGCAGGGGATTTGAGTTTGATTAATGCAATGTTGCCTCCAACAACATAGAGGTACGGGATGCATCCACCACGTGTATTTCTCCATAATGATAATGTTAGTAATTGCTCTAAGGGGATAAATAACATTTAACTGGACTTAACTAAACTGAATGAGTGTACCTCCTGTGAGTCGAAAGGGTTGATTCCAGACTTCATGAGCATGTTGGCCAGCACCAGGTACTTCAGACAGGTGGTTCTCCTGGGGCTGCCTGACTCATCGTAGTTCTTAAACGCCTCAAAGAAGTCTGTGTGGGCCTTCTCAAACTCCCCCTCTCTCAGGTGCATCTTACCCCCACACTCTGGGGAAGGGGACAAAACAGGAACAGGCCTGTTAGTACATCACATAAACACACGCAGTGA…
CLocus_73159	1	149	46.19	9.92	25	45911	TGCAGCACATCCCCAGAGTACAGACGCTCCAAGGCACTCTTTGGTCTCTCCTGAGAGGAGGGAGGGAGGGTAAAAATTAACACAGCTCACGACACCAGCAAGAGAGAGCGGGAGGGAGGGAGCAGGGGAGAGGATGGCAAAGGAAGAGGGGGAGACAGAGAGGGAGAGGGAGAAAGAGAGCAGGAGGGAAAGAAAGGAGAGATTAAACGAAAGACGAGGAATGGGTTAGAGAAGGCTGAAGGGAGAGAGCTTAGGTGCCACCATCATTTTATATTAGATCAAGATGCAAAAAAGTCTTTAGAGAACTTTAGAATGTTGAAGAAATCCCATTAAAGTGGATGATTTTTGGGGGGGAGGACAAAAAGCTTTATAGTTTAAAAAGTATACATTTTATAAAAA…
CLocus_117037	1	150	46.19	9.92	30	64917	TGCAGCGCACTGGTATTCTGTCAGCATGAGTGTGTGTGTCCCTTAGTGTGTGTGTGTCCCTTAGTGTGTGTGTGTCCCTTAGTGTGTGTGTGTCCCTTAGTGTGCGTGTGTCCCTTAGTATGCGTGTGTGTCTCTTAGTGNNNNNNNNNNTGTGTTTGTCTCTTAGAGTGTGTGTGTACATGTGTTTGTGTGTGTGTCAAGGTACACTCCGTCCCAGGACCCACTAATCCTTCACAGCTGGTCTCCCTCTCTAACTGTTCTCTGTCTCCCTCTGTCTCTCCCTCCCTCCCACAGACATAGACGAGTGTACCTTTGCCGATATCTGTGTGAATGGAAGGTGTCAGAACATTCCGGGGCTGTTCAGGTGTCAGTGTAGCATCGGCTACGAGCTGGACAGGA…
CLocus_4921	1	151	46.19	10.48	131	3503	TGCAGTTGGAGAAGTGTGCTCAGGATCTGGGCAGCACCTCAAAGTCTGTGGGATCCTCCATGGCTCAGCTGCTCACCTGTGCTGCACAGGGCAATGAACACTACACAGGTACTGTACTACTGCCCTGGGGTTCCCATTCTAATTAGAGCAATACCACTAAATAACAAACTCCATAGCACCACCAGGATGTGTCTATAATAGTATATTTCACTTTTGACTACAGATTTTACTGTTACTACTGAAAGCGTCAACATATTTTGATGCTTCAAGGTCAATAGTAAATTAGTTTCAACCTTTACTCTCTGAAAAGTAGCACAAAGACTAAAACAGAAGAAATCCTTCCCCTACTTCAATAGATGTGACATTCCTTCAGTAATCTTGTCTAGATGAATGGGGTAA…
CLocus_33266	1	152	46.19	10.48	23	22534	TGCAGGCTGCGCTGTTATCATTCACCAAGACATTTAGCCAGTTAATTGCCATTCATCTAAATTGGGAAATCATTTGACTTGAGACGATGATTAATTGACTGTTTTGACAACTCGTTCTAAATAAACAGCTCAGGTAGAAATTGTTATGCTGTTTCCTCCAACAACAATAAAATACTAAAATACTTATGAATACTAACAGTATGCAGTGGAGGTGTGGGAGAAATAAATAGTTTAGCCATTGGGAGCATGTATCTATGCATCATGCTCACATGCTGTGTTTCTGATGTAATCTCATAAAAACACAACCATGGAAACAGCAGCATTCTGATTGCCATCTACTCCTCATGCATTCTTTGATCTTAGAAATAAAATATCAGCTGAAATTTTTTTGGGGGGGGA…
CLocus_84536	1	153	46.19	10.48	133	51569	TGCAGGTGAGTCATTTTTTCCCCCTTATATCCACAAACCCAGATAACACTCTGGGTTCCTCTGACTAATGTGTGGGTGGTGTTCAGTAGGGAGTGAACATTTTGGAACAGAGTGAAATGGGGGAGGTACTACGGTGTTCCTCACTGATCATAACCTAGGTGGTTGATTACACTTTAGAGCAGTGTGTGATCTGCATATTGTCATGTTGAAGGATGCAGTTAACTACAAAGGCTCCATATAATAGCAATGAAAGTTGGTCAAAGTGTAGCCAAAGTGAGAGCCAGTGTCTTGACCTCCGATAAAGAAAAGTGGCCTCCTTTAGGATGGTGTTCCCCCCCCCCTCCCCATTATCAGTAGACTGTCTGGGTTGTGGTGGTGAGGCAGGCAGCTCACAGCCTC…
CLocus_34137	1	154	46.19	10.48	180	23050	TGCAGAACATCTGTCATTCTTGTAAAAACACAATTCACAATTTCAGTTAGCGTGACGCAACAACAGAAAGTGAAGGTGCTCAACAAAAATAACTGGTGCGACAATCCTGAAGTTCCAGCCCACTGCAAGCCTTCTTATGTTCCATGCTTTGGTGAGATGTCACTGAAAAACCCAGCCAGATTATTTTTTTACCACTATCCATCTTTACATTTCTGAATACATCAGGTATAAAATATACTTGATATCCCATTTCTTGGTGTCTGAAAATACTTCCAGTAGCATTAAGAATGCAGTGTTTAGATATGCTAATTAAACATTACGTCTGATTTATCATACATATAATGCTCGTTTAAAGTTAAAAAGCAACGCTGAGATGCTGACTAATGAGTGATGGGTGGG…
CLocus_31034	1	155	46.19	10.48	101	21117	TGCAGCCCTTAGTGAAGGCCTTTGGCATTGATCCTGACAACATGTTTGGCTTCTGGGATGTGAGTGCATGTTATCTGATGATGCAGAATATGTCATGTGTACAGTGCATTTGGGGTAGTATAGTGCTCTTCCTGCAATCACAGGCTTTTGACGGGACTTAGGCAACAACTATAAATAGCATAGACTTCTGACCTGTGAAGTAGGTGCCTGGGCTCACAGGCTGGCAGCTGTGGGGTAATCAGAAGCCGCCCTCTCCAGCTCTGCCCTCAAAGAGTATTATATTATTGGTAGCGACCTTCTCCCTTGGAGAGGTTACTGTAAAGGCTGGGTCACATCAAAGGTCAGAAAGCTACATTTAGTTACATTGTTGGTATTTAAAGGGTAACAGCTCTAACATGC…
CLocus_73372	1	156	46.19	10.48	243	46020	TGCAGAGGGACTACCTAATCAATTTTAGAATAAGGCTGTAACATAACAAAATATGGAAAAGGGCAAGGGGTCTGAATACTTTCCGAATGCACTGTATGAGTGCATAAAAAAGGGAAATTGTACAATAAATTGAATACCTGAATTCCCACCAGAATCCCTGAACTCCATTCATTAGTTGTCTGTGCCAGTAATATGTTTTGTGTGCTATAATTCAGTTAATATCTGAAATATTTTAAACATTAAATTTTTTTGGAGTATCTTCATCTATTGTCCAACTGTTGCATTTATTAGAATTGTTTTTAAACCTTTTAACAATGTTGATGAACGTTGCTACATACAGCCAGCTCTCAGGATCTACATGTGAATCCAAACCCTCTCCACAGCAATAATCCATACATC…
CLocus_29707	1	157	46.19	10.48	187	20158	TGCAGCTAGACAGTCATTCAGGCAGAGAGGCAGGCTGCCGGGGGAGGAGAGGATGCAGCCAAGTACTGTTGTATCATCCTTTTACCATGAATTATAGAACAGGGCATGAAATGTTAACTGTACAGTTTCCAACTGATTTAGACATCACCTTAGTGAGTCATACTGTATTCGTCACACTGATTTCAGCGGACACTGTTTCTTTCACAGGGATTTCTTCATTCGTGATGTCATTTGGTACGATGCAGTGATATGATAAGGATCCTGGGGAAAGCCATGTAATCTTGATACTTAGTCTATACAGTAGCAGACAGTCTGTTCTTCATATTGCATTTGGCAAAACAAATTATTAGACACAGATTATATAAACCTTTGATATGTAACCAAAACAATAAAGATAGA…
CLocus_35661	1	158	46.19	10.48	225	23978	TGCAGTATTAGTCCAGTCTTCCTCTGTCCTCTCTCCCATCCTGACCCCCTGATTACCAGCAGACTGAACCAAAGCCTTTTCATCCCCTCCCCTGGTTCTGTTAATCTTGGCTTGCCTTCTCTTCGTCTACTGGTTCAAAGAGGGGCTCCAGCATATAATCTGGTGTATGGTACATCTGTGAATTATTATTCTAATTCTTTATACGTTTATTAGAGCTGAATAAACTCCACATCAAATACATCACTTGGGCGATGTCAAAAGGCCCGGGGCAAATCAGCCGACATCTGTTAACTCTTTCAAAATGGCCTCATCCAGCATGTCTGTGGGCGGAGAGGGAGAGAAAGAAAGAAAGAGAGAGAAAGAAAGAGGGACAGAGGGAGAGAGAGAGATGGGGACAGA…
CLocus_15441	1	159	46.19	10.48	177	10652	TGCAGGGAAGGAAAACAAATCAATAAGGAAACTGTAGGTAATGGTAATGCATGGAACTAGCTAGCTAGTGTAACGGTAGTAAGCCTGAGCAACAAGCCCTCTCTGTCTAGTACTAGTTTCTAGTGTTGTTTCACTGGCCAGAGACAGTTGTAGAGGGTTAGCTGAGCAGCTAAACTTGCTAGTTAAGTTCATATTGTTATTAGCTAGCTAACTAACTAGCTACCGCTATCAAAACAACGCCCATTTTGGTCCAGCTAGCTAGTGAGTGCTAGACTAATGTTAGCATGGAAGCTAGCTAGCTGTTAGCTACACGTTTAGACAGCTAGCTAGCTACCCAATGTTGTATAGTTCAAATAAAACAATAAACTCCTATAGAGGACCTGATATTGCTTATAAATT…
CLocus_31613	1	160	46.19	10.48	59	21459	TGCAGAGCAAACATAACAAACACTGGGCCGAGGAGAGTTGTGGTTTGGTTCCGTATGACGGCCAGTGCTAAAGGTAGCTACATTTTGCTTGTTATTACTCGTGTCACATATTCAAAAATGTCCCCTATGACTCAAACCATGCTTGATCTGATCTTTCAGGAATATGGAATATGTGGATAAAAAGGCTGTATCAATCAACCACATGTTCGGAATTATGATGACACAAAGCTACTTCCATTACAGTCAAAACAATTCACAAAGTATGTCAGAAATTCATTGGATCTGTGACAGATGCACACCAAAACCTCAACACTGTAGTTGATACTAGGGCTGTTGCAGTGACCATATTACCGTCACACCGGCAGTCACGAGTCATGAAGGCAGTCAAATTCCACGTGA…
CLocus_119085	1	161	46.19	10.48	46	65497	TGCAGGAAATGTTTCCACTGCCCCATCACGTGTAGGGGTGTCCTTTACAGACAAGGCCAATCGTTGCTCCAGGTTTGCCCGACCTTGAGCAGCCTGAGGTGCTGAATCTGCTTTGTGGTCCCATTTTCTGCAATAAAGCCGTTGATGTATATTCACCGACATTGGTCTTCATAAGTGCCAGTATCACGAAGGACGTATAAAGACAAATACCTCTGCTTTTCTGCCGGCCGCTGTTCTCTCCTTTATTGCTGCATACCCTCTGAGAGAGGTACAGGACTCTGGAGGCAACAATGAAGTTAAAACAAATGGATCCTAAATGCAGAATTAATTTAAAAATCCAATAGTGTTATGGTTTCAATAAAGGGGCATGGCTTACCGAGTGCCGGTGCTGTTGGGTCC…
CLocus_24714	1	162	46.19	10.48	276	16777	TGCAGCAGAGCTCTTAGAACTGTCAGACTGTCAGACAGAATGCTTTCACTCACTTACATCATATTTCATTCACATCCCTCACCAGCGGTGCAGGTACATCCAAACCTGAACATGACGGTTTATCAAGGCTATTCATTTTCTTCTGTGACGGCCGAATCAGAACAACCACTGAAAAATTAATCCCCTACTGTCAGCCTGCCAGCTTGTGCATAGCAAGCAGGGGAGTGAGGCTTTCCATTCCATAAATACCACTTTGAATATTTTACAATTACTAAAAGCAATTCAAGGTAACCATTCATATTTAATTTCCATGTCCGGGTACGGGTACGTACCTCTCTGGGATATCTTTTGAGAGTAATTTGTCTTAGACGTGAAAAAGGCATCAATATTTGAATTTCT…
CLocus_39751	1	163	46.19	10.48	151	26526	TGCAGAGAATAAATCCCCCATATTACACAGCACTTCATTTGGGTAATAATATAATAAAAAGTGTGTAATAAGTCACAAATAGCCAGGTAGGCCTATATATGAAAAGGCAGACCCCAACTTCTAAATATTCTCACTTCTCATAATTATTTTCAATGTGAATGCCACCTTTTATCAGTAGTGGTGCGTGGGTAAAATCACTGGGGAAGCCAATCCAGAAAAAAAGCCATATTACAATCTATGTGTTGTGATAATTGCGTTGTTTGCTCTATAATCTGGTAGTTCATACGCTATGACACCACGATACACTATATAGGCCTAAGGCCGAGTGGCAGAATAAATTCAAACACACATTTGTTTCATTACAAAAACAAAGAGAAACATCTGTCCGGTCAAGTCCAC…
CLocus_254	1	164	46.19	10.48	199	357	TGCAGACCCTGCGGGTATAACCGCGGGGCGGTCGGGTTTAGGGTTATGAAATATTGTGTGGATGAAGGGCGGGTGGGTGGCGGGTTGAATAAAGAGGAAACAACACCTTAATAAATCCGGGTTAGGGCCGGTTGCTGGCCTCAGATTCACTTTTTCACATACTTGGGCGGTTGTGGATGGGTTATTAGCAATAGCGGGCGGGTGCGGGTGAACAAACAGCTGACCCGCGCAACATTAGTAAGTGTAAACTGACCCATAACCCAATGAGTCCCACCTTATCGCTGGTGTGTTTTGGACTTCTAACCACTTTTAAACAGTGTTTGTTTGAGCTACGGACTTCTGGGTTGTACCATTTGATTTCGTCTGTTCTACAAAAACGTATGGAGTCCAAATGGTTTG…
CLocus_14760	1	165	46.19	10.48	59	10238	TGCAGTCAAATGCCTCTGTCATTATGCATGTTCCCTTTTCTTAACTGCTATGCCATCTGATTATATTGGCAACAGGAAACATCAACACCAGCAGCTGGTTGTTAGACTGCTATATAAACATTAGGAATTATATTTTATTTTCTGGATAGACAATCAAATCATACAAACAACCTTACAGGGGCTACTTGAACTAGGCTCTTGCCTAACTTGAGATGTAATTTACAAGTTGTTAGTCATGTTCTATAAATATAGCATTATTATATATGTGGGGTGTACATTTCACCTTTACCTAGTGTTAACAGCAGAGGAGAAGGTAATCTCCACTCTGACAGTATTTACATTGCCAGTCTGCCATTCAACAGCAGACAGGAGCAGGTTGTAGAGGTCCCACTCAGTAAG…
CLocus_38536	1	166	46.19	10.48	9	25781	TGCAGGCTTTCAGATTCCCTGTTTTTGTAGGGAATAAGGGGAAGATTCATCCTGCTTATCTCCCATGGGCAGGCCACTGAGAAGCAAAAGAAACCTGATGAGCTGAAAGGGTAAATATTAGGGGGAAAACCCTTGAAAACCCATTCTTAAAAGAGATACTGCTGCATATTTATAAAAACAGCCTTTATTATTTCCATATTAATGGGATCGTTTTTAGATGGACATGTAGTCAGACACTACAAATCTGGTCCCCTATATTTTGATAAATATGCCTATAATAATAAAGGCTACCATTTGGCAAATCAAAAACTGATTTTGGGTTGAAAAGATTATTAGATGTGTACTTGAGCAAATATGTTTTATAATGCTCTACAATACAAAAGGTAGGTCCCCAATTAA…
CLocus_108663	1	167	46.19	10.77	56	61971	TGCAGATACTCAGTCGGAAAACAGAGGTGCTGGGTCTACAGTCACTGCAAAGCATAACTTAGGGAAAACGCTACCAGCCCAAGTGGGTAACGTTACTACACTAGTACAGCAGCAGCAACAAGGACAACATAAAGCTGGGATGCACCAGGAGATGAACTATAAACAAATTATCTTAGAGAAAACTGTTACATCTTCTTCGCTGAGTTCTATTCCGTCCTTTGAGGAAGCTTCCACCACTTCAGGGACTGGAGTAAACGCTACCAAGAGCGGTTTGCAATCACATGGAACATCATCTATCACAACAGTACCTGCATCTGGTGGTGTAGCAACTTATCCGCTTGTCAACAGCATCAGCAGCAGCACCAGCCGAGGTTCCGCTCTGGCTTCAGGTCAGACATC…
CLocus_20252	1	168	46.19	10.77	94	13964	TGCAGTCTGGAGTGATTCTGTTTGAAACCACTTGCACGCTATCCAGACAAACACAAACACATTCACATTTGCATGTCATACACACACTCAAAAAATTTAGGACAATTTTGTTATCATGAGATTCATGATCAGTCATTAAATTACAATTTTTTCTCATGAAAAATACAGAACTCAGATATGAAACTGAGTAAACCCAAATATATAATTTTACGGCTCCATTAAAAAATTTTACTATTCAGGAACAAGAGCTCCTAAATATTCAGTTGAGTTATTGTTCCCACGTGTTACAGAATGTATTGCACTGTATGTAAAAAATGAACAAACATGGTCTTTGTGTCAGCCATAGGAAGAGACGGCTTTGTTTTGTCGTCTGTACTTTATTACAGTTTGCCATCTGCA…
CLocus_54999	1	169	46.19	11.05	90	35898	TGCAGACATGGTGGTGTTTGTGTTAATATGCCTAGTCACTGTAGTTCCACACTGCTGGGCACAGAGGCAATTAGCCAAGGGACCCTCCCCGAGTCAAGTGGAATTGAGTGTGCTTGTGTGTTCATCACAGAATGATTACC
CLocus_40238	1	170	46.19	11.33	185	26803	TGCAGTCTTGGCCCTGCAGAACTAATTTGTGCAGAAGTATCCGCTATAAAAGATAAGAAAAACATGGTCCGATGCATGTTATAGTACCACCTCATATGTAAACATCATCCATATTCAGAGCACATTTATTTTGATGAATATGAATTAACACTGCCAAGTATGAACTATGAATACAAATGCGGTCTCATGTCTTCTTCCGCTAGTTTACTTAATCTCTTTCCCCTCCACTCTCTAGGAACATATTAATGCATAGTGTCTGTGCTCTGGCCAGTATGTGCTGTTAGCACAAGGACTGGACCAGCTGACCAGGCCCCAGCCACTGTCTGGGATGTATTGCCTTGTAGTTTTACTGGTAAATAAATGTTTGATATCCTGTCTGAGAAATGCTTTGCCCACAAC…
CLocus_18357	1	171	46.19	12.17	205	12673	TGCAGGCCTATTTGGGTGAGGTTTTCCCCAGATCGTATACCTATTTGGCAACAACATCAACAAAAAAGACAAAATAAATCACGAACTATTTTTAGCAGGAAGAGGGGGAGGTTACTGCCCCTATAGACAAACAACCAAATGTCTTGACCAGTTAAAAGTCTATATAACAAGAAAAAAGTCTCACCCAGAAGATGAAGTTGAAGAAGAAAAGCATGTATTTGATACATTTAGTGCAGCCTTCGACTCCCATAGTTGAAGTATTCAGATCCCTTTCGGTGGTGATGCGACGGGCAAGAGACACAAGGCCAGGCGGTTGTTGAATGAAAATAATCCGTTTCCCCCCCCCCACTGGACTCTTTGTCGAGGTCGACGGCAACACCCAAGTACTCCCCGCCCCTT…
CLocus_56642	1	172	46.19	12.17	111	36894	TGCAGCTTTCCCTCTCTCCTTATCTGAGTGTTGACCAGGACCACTCTGTCAACAGTATCGATGACAGGACCTGGTGCAGCTTAGCATAGCGTCAGAGGAGTGGTGCTAGCAAGAGGCTAACCGTCTAACCGTCTCTGCTAATTGCCTCATTAATGATTCGCCGGTGTGAGCCTGCTCTAGCACTTCGTTGTGGGGAGCAAATTGTTCTGATTGGTTTGCCTCTGTCAATTATTGATGAGGCAAGCGACCTCAAGTGCTAACACCTGGCTTTGGTGCTGCGGAGTGGCCCACCGTTCCCATCGCTGGGTAGCTGTGTTGTTCACACTGCTAGAGTATTGTGTTGCTCCCGAACACAGCTTACCTCTTAGCCAGGGGTGTATTCAGGGCTGTGTTGGTTCT…
CLocus_34801	1	173	46.19	12.17	70	23464	TGCAGAATGATTAAGTAGCTTTTTCTGAGTGGTCTCAAACCCCAGAACTATTACCAATACTAAATCATGCCCAGAGCTTAGCTTGACCCCACGATTTTCTGGATTCTCAAAACCCAAATCTAGCTCCATCCCCAGCCTCCAAACCTACCCTCATCCTAAGCCCCATCCTCAACTCCGACATCCCATCCAGAACCCCAGCTCAGCGCCAACCCCACTCCCAAGCCTGAGATTGAATCCTTGCCATTTCAGTTTGTCAGTGATGTGTACACGGAAGGTGGAAAGCTTCAAATTCCTCGGCGCACACATCACTGACAAACTGAAATGGTCCACCCACACAGACGGTGTGGTGAAGAAGGCGCAACAGCACCTCTTCAACCTCAGGAGACTGAAGACATTTGG…
CLocus_39683	1	174	46.19	12.17	29	26474	TGCAGGGGTAAGAAAACAACACATGCACCGGGGTTGCAGTGAAAGACCGAAGAAAATATACTGGTCAACTTCAACAAACACTAGAGTAGAGTGTTACCATAAGATGCCAAGATTCTGTGGTATGTACATCTTAATATCAGATGTGCTGTTCATTTCAATTGCCAAGAAAATGTGAGTTCTGTTTAAAGTCACAGACTATTGGAAGGTTAAACAAACTGACTGCTGACAGGGATGTAACCCCCACAGAATCCACCACTCTAACTATTGAAAATAGCATTTGTTGATAGGATACACATGTCAAACAGTATAATTTCAAGGTAATGTCCTATTGTCTTCAAATATTGATTGTTGTCACATAGGCACACACATGAAAAAATACTAGGTTTACTATAGAATTCT…
CLocus_31306	1	175	46.19	12.17	163	21273	TGCAGTCTGCAGCTTTGCGTGTAAAGTGGTTCAAACTCTGATTATCCACACGAGGTGGAGAAAGGAGAACTCCCATCTCAGACAATCACTAAGAGGAAGTTCTGAGGAAACATCCCATGGAGACCGGACAACTAAGAAGAAGGACATTGTGACCTCTGGTGGACAATCAGAGTGTGTACAAGTGACCCACAGGAAAGGCCCACCAACAACTTTCCGAGAAGGCTTGGTTCCGACCGAGATAAACAACGAGCAAAGGCATTTCACACAAAAATACATTCATTATTTCTTATTCCAAACGGACGGTGGTTCATAAGCAAAGTATATGATTAATGTGAGGACAGTCCTAGAATGTATCCGCGATAAGTGTCCTTTTTCTCTATCCCCCCCTTCCATCTATGT…
CLocus_58189	1	176	46.19	12.17	84	37807	TGCAGCTTTAGCTCAGCTCGAAATAACAGAGAAATACTGTGAAAACTAGAGTGCTGCAAACGTTATAAAAGGTTTTGTCCACATTGCTTCTTTGTTGAAATGTTTTGTCTTAATTACTGATCTGGGGAGCACCTTTGCAGCTCCGCCCAAGCAAGGCATTTGCTTGGTTTGACATGTTGCGAGGCGTCACTGATTTACACTGGGTTCCGACCCCTGTTTAGCTGATTTCTGCCATGGAACTTCCCCAGGCTTCCCATTTTAGGGAAGCCTGGTTAGTGACAAGGCTAATATGGAGTGGACAGGGCTGAATGGATACGGTGAGTTTTTCAGACAATGTAGAGGGGTGAGTGAATATTAAGATGGAGTTGAACTAATGACTGACTTAAAGTGACGCAAAAA…
CLocus_11026	1	177	46.19	12.17	36	7443	TGCAGTGTCTGAGTCACCATGCAGTGACAAACAGAGAGAGGGGGGAGGGAGAGGGGCAGATGAACAGCGAATGGACATAATCAGAGAAATACAGCGACAGTGGTCATACGTTATCATATTATATCAATCCGACTCATTTTGACATTCATCTTGACCCTTTTCTGATTCTGTCCCCCACTCAATAAATTATGCTCTGACACTTTCTTTATCTAGCAAACTCTGTGCTGATTTCTATAGTTCTGCCTTGGTGTCAAGACGCTATATTGTGGGGTTTTCTGTCTTTGTCTATGAGAGAATCAGACTGCACTTGTTTCTTTCTTCCGTAAATGTCAAGGCACTGTCTCTCGTGTGCCTCCCCTTGTATGTGTTCATTTTCTATGGTTTGTTCCCTCTCACTCA…
CLocus_111136	1	178	46.19	12.17	9	62839	TGCAGTGGAAGGTGGCCGAGCTACAGCGGTGTTTGTCAGACCATGACACATCCCGAAAATCCGTCTTCTCACGAAAACGGATGTAGCCTATTAACTAATAACTAATACTCCATGGAAAGATGCTCACAAACACGATGGTGGTCACCGTTATGCTCTACGATCCCCACAAGCCCCACGGGACTCATCTAAAGTCGGAATCGTTGATATGTCAACTTCTATTTGTAGCGTCCGAACCTTTGGGCTACAAACTAATGTGACCCCACTGTGAAAAGGGACTTGTCTGGAGGTAACCGGTACCGGTTTAAAAAATGAATGGAAGTATGGAGGTAGTTAACCCCCAAAAAAGGGGTTAACTATGTGTAAAAAAATTGTTTTTATATATATATATACTGAACAAAA…
CLocus_73096	1	179	46.19	12.17	73	45888	TGCAGCTAAAAAGAGAATTCAGACACCCATTACATGAGAATGAAAGAAAATACACATTTGCCAAATGAGAGGTTATAAGGTGCTATACTGTAAAATACCTGTAATATTAGCTTTCCAGTCACTTGATATATTTGATCAGAGCTCATACAAGTACCCAATAAGAATAGCCATGTTGGTCATAAATTAGTATTCACATTAATATTCACTGAAAGCATGTAACACTTGCATAATGCAATTGGCCAAATTGGAATTCCATTGCTTATCTACTAGGTTCCGCTTTGTGTGGTAGTTAAATAAAACCGTATCACAATGTGTTATCACAGCTCCTATAGCAACAGTTATTGCTTTCAGCTCTAGGGCTTTTGGCATTTTCTAACTGACTCCATATCAGGAATTGTA…
CLocus_115530	1	180	46.19	12.17	89	64439	TGCAGGAAGGGAGCTGTACAACAGAGAGAAAATACTCTAGTAGTTTCACTATTCAAATACTAATAACCTGTATTCAGGGCCAATTTTCCTGCCAGGTCATGTGGTCAGGAAAAACTTCTGTTGTGCACAGGTTTAGAAAACTTAACACGAACATGCACACATCCCCTCTTCTTCATGCTCAGAGTTAACAGGGTTTCTGTAGTTGACTCAAAAATAACCACATGCCAAAGATCAATAGTTGAAATTAACTATAGAAAACAAAATGTATTAAAAAGAAGCCCAAAGGAGGGAGTAGGGCAGATGTATGTAGGAAGTGGATTTGTAAAATACTAAAGATCTATTCTGTTCTTGTGTTCTGGTTGTAACTACAGTGTGTGAGCATAAGGAATGAACTGTGTG…
CLocus_48096	1	181	46.19	12.46	13	31731	TGCAGTCTGCTGGATCCCTGCCAGAGTTTCTCTGGGCTACTTGTGCCAGTGGTAGCAATCTATCACTGTTAGGCATGCATTTATTATTGGTCATGTCACGGCCGTCGAAAGAACTGGACAAAGGTGCAGCGTGGTCAGAGCGTACATATTCCTTTATTTCATATGACGCCGACAAAAACAATAAACAATCCAAAACAACCGTGAAGCTAAAGGCTATAGTGCCAACAAACAAAGACAACTTCCCACAAAGACAGGTGGGAAAAAGGGCTACCTAAGTATGGTTCTCAATCAGAGACAACGATAGACAGCTGTCCCTGATTGAGAACCCTACCCGGCCAAAACATAGAAATACAAATAATAGAACGAAAGAACATAGCATACCCACCCCAAATCACACCC…
CLocus_52178	1	182	46.19	12.46	143	34167	TGCAGTCTTGGCCCTGCAGAACCGGACTGTTTGTGGATAATTCATTTTTCAGAAGAAAATGTAAATATAGAATAAAACATTTACAACATATCAACAATGACCTATGTTACAGTATAAGTCTGGGGAATATGCTAAGTATGACCACACAACATCTGGTGAATGCAGATGCTTCTGAGGCTGAGAAAAATGTGTCGGCGTTTGGGAAGTGTCTGACTTTTGGGAAATGGCAGTTAAAGACAAGGACACTGAATTTAGACACTGAACGCGAACGATTGACCTGTATTTAGACCCAATCACCATCTCTTTAAAGTCATTTACATACAGTCCAGTTTGTAACATTCTCTATGAAATGGGCTTTTAAATGATTTGTGATTCAATGTAGTGAGCTTTGAAATTATG…
CLocus_57672	1	183	46.19	12.46	202	37521	TGCAGAGGCAGAACAGAAACTCCTATTTACTTAGCCATAACTGTCATTTTAAGTTGTTTTATTTTAACCTGTAACTTAAACAACCACTGTCTGTTTAATTACTGTAATGCCCTTTTTACACTACTTTGCTGAGCCAGACCGTACTGTGCTGGCTCAGATATTTTATTGGTGGATGCGTAACCATGCCAGCGCAGTACAGCTCGACTTGGCTCAGTAGTGTGAAAAGGGTATACAACTACTACAAATAATGCTGTGTACAAGATGTGCAGTATCACAGTCATCATTCACAAGTACTTTGGAATATACATCTACTGTAAACATTGCTGGCCGTCGAAACATCGCAACCAACTATTTGAGATACCAAATAGTTTGTAAATGTTGTTTTTTGGTCATGAAGAA…
CLocus_93651	1	184	46.19	12.46	117	55851	TGCAGCCAATTTACAAAGGAAAGAAAATGTATTTTGGGGGAAAAAAAACACATGGCAGAGTTGGACTGTGTTTTAACATTATCAGCCTCACTGGTGCAGTCTGTATAGACGGGTTAGCTGACAACGTCACGGAAACGATGTTGCATGCTTCAATGGGGCAGAAATCCTTGTGTTGTTGTGATTCTGGATGGCCAGATAGCTAGCAACAATGACAAGAAGCTGCCATGTGGGGAATCCTAGGTGTCTCGTTTCAGCTAGTTTTAACTTGTTCTTGACACCATAACCTCTTTTGAGGTGTTTTGACTGTTGCCACGTCTATGCTAATATGGCAAAAAAATTGCTAGCTAGCTAACCAACAACTGTAACGATGTATTTGAGAGACAACAAGTGCTCATTGTG…
CLocus_26564	1	185	46.19	12.46	199	18050	TGCAGCCGTCTATCTGATCTCTGGTCTAGCTCTTAAGCCCTGCCTGCCTGCCTGGATGGGGGAGGAAAGAGGTGAGGGGAGGAGGAGGGAGGACATTTGGGTAGAGTGAGGGGGAAACGCGGATGGAGACAGAGCAGACTGCTGCCTGGTGGCAGAGTGGTGTCTTGCTGCTCTGGGGGCCTGTGGGGCTCTGGGGGCCTTTGGGGTCTGCATACCAAAGAAAATATCCCCCTCTAGTCTCCAGCTAACTCAGGGCTCAGCGCTAAGAGAGAGAGAGAGTAATTTCAGCAGATAATGCATGCAGGGATTAGGATTTAAATGGAGTCCAGCGGGTGTAATGGTGCCTCTCTGCAATCCAGCATCCTCAGACTGAGCAGGGTCACACTAATCAAAGACAGA…
CLocus_111737	1	186	46.19	12.46	134	63120	TGCAGTTGTTTTGTTTGGAACACAGCCCTGCATCCCCGCCATCACACAATTACTGTTGTTGTTTACGCAATCCATAAACGTCCCCATTATAAATCACAATCTGGGTTAGGTGGGCATCATATGAAAGCTTGTTCTATTCCCAACATGACTAGCTAAGTTACAAAATATGACCTTACAGTGTCAGGCTTTCACAAGGCAATTCAGAGAAACTAAACATAATTTTGTTGCTCATAGAAAAGAGTAATGCGTGCATTCAGGTGCGTGTTCCGCAGAAAATGTTCTTCACAATAGACAAACATCAGCTCATTCTGTTCAGAACAACCCAGGGTATAACGCCATGTCATCTTGTAACTGTCCATAAAATATAGTGAACATAAACATTGGCACTGTATAGTGTAT…
CLocus_23778	1	187	46.19	12.74	39	16192	TGCAGAGCTATACAAGGCAAGGTGTTTTCAGTCTGGGCTCTCTGTGGTAATTCTCAATTTTTTTGTCATGCTCTCCATTTATCTCCCTCTTTACAACTCAATGTTTTTCTCTAAACTCCACCACCCCACCTCATATGCCCCTTTCTCTCGGCTTTCCTCCAATCTCTGTTTCCATCGTTCTATCTCTATATCTCTCTTATTTTGCCATTTCAGAGATAAAGCATAGAGGAATCCATGCGCTGCCAGTGCAGCTTACAATTTCTCCTGCCTTCTATCAGATGGTATATCTGCCCCTGGCTCTCTCTCTATCAGTCATATCCTCAGCCTCTATCCATCTCCATCATCTCGTCCAACACCATACATCAAACCACAAGGGAAATGGACTGATAATGGAAAGAG…
CLocus_120349	1	188	46.19	13.02	42	65801	TGCAGACCTGGGACCAGGCTACTACTGTTACTATCTGCATAACCATTAGCCCTAATAAGCACTGGTCTTTGTTTTGTCTTTGTTCCTCTCAGTGAACGATGCTAAGGGAAAGCAGAAGGTTCTGTGTTCCAACCAGAAGCTGAAGTTTAATCCCACCGAGCTCATCCTTTACTGCAAGGACTTCCGAATCATCAGGTTCCGCTTCGACGAGGCTGGGCCTCAAAGCGCCAAAAAGGTTTGCGATATAAGCTTTCTGAACAAAATGGACACTTTTGATGTATAAACACTATATACATTTTACATGGTTTTGACTCTTGAATTGAACCTGATGCTAAATACCAGCCATCTAGCATGGTAATCCTCCAACTCAACTCTGCCTCACCACTACAGGGGATTAGT…
CLocus_6812	1	189	46.19	13.02	16	4673	TGCAGTAATTATGCAGGAGAGGGGCTGCGAGAGTGGGCAGGCTTTGACATCTGGGCCATGACCTTTGACATGGAATCTGGGCAAGCTAAATCCTGCCAAAGGAAGGGTTATGGACACTGCTCTTAGGGGGGAGGGTCAAGCAGGGGAACTGAGCAGAAAAGGGGGAAAAAACACCAAGAGACAAAAATAAAAATTCACTTAATAGGTGACGATAAATAGTGCCAATAGGAGGAAATGGTGAAGCGAGAGAGCAGAACTCTTCAATGGGCAATTTCATAGCCGATATAATGAAAGCATGATTAGCTTTAGCAAGCTCAATTGTTCAGCTTAACTGCTCTTTGAAACATAGGTGTGACCTAAGGTTATACTATGTTTTCTGTATAAATTCAGAAAATGGAA…
CLocus_146425	1	190	46.19	13.02	65	72478	TGCAGTCCCCCCGGAGGAGCCTTGTACGGCATAGCTTTGGTCATCCTGTGTGGAGAGACATGCTTCCCCCCCCCTCCTCCTCCAGCTCCTCCTCCGCTCACCTTCTTCTGCTTCTGAGAAGCTCCAGTACCAACCCCCAAACCCATGCCCTCCCTTACTCCTGCCTCAGGATTAACCCCGGCCCCTGGACTAACACTAGTCCTTTTCTTCTTACGTGCCTCTGCTCGTGCTCTCGGGGTGTCTGGGGCGGGAGGACGGGCGGATAGGAGGTGTGGTCCAACCCCCCCTGGGGGCCCTCCCGGCCTCCATGGTCCCCCTGCCGTCCCGGGGGGCAGCTTGGGGGGTTTGGGTCGTTTGTGTTGGGTGTGCAGATGCAGGCCGTCGATGAACTCCTCACAG…
CLocus_56755	1	191	46.19	13.02	89	36926	TGCAGTAGATGTTCCCTAATTATTCACTTAGACAAAAAAACACACAGAGACACAAACAAAAGAGGGTGAAGAATCCCCAACAACTCACATTGCCATGGTTGACGAAGCCATGTTTACTGGCAATGCGGTCAGCCTCATCTGGTCCTCCAGCGATGTGGACGGCCCATGTGTTGGTGTAAACCCTCTGACCAAGGGCCATGCCCAGCCCAGACACCAGCAGGACCAGCAATGGTCCCAGTAGCAGCCGCGACCAAGGGCCCATGGAGGAGGATGGAAGACCCAGAGCCATGGTGTCCTACAACAGCGCAGTCCCTGAGCTCAGCGTCTCTATGATAGGCCGGGGGTGGCCAGGGGACATACAGGGGCGCAGAGAGACGACACAGGAACAGTCACTGCACC…
CLocus_50129	1	192	46.19	13.02	310	32896	TGCAGTCATTCAACATCAGCCACTTATAGATCTTACATCTCTGAACTCCATTTGGACTTTGACTGGCCTGGGTATGAAGACCCGACAAACGACAGCAAACCGCACTCTTCGCAGGGCAAGGGTCCACACATGGATGACAATCCTAAATGAGTCAGTGTCAGCAGACAGTCTACACTCCCCTGCACCTTCACGCGGCCAAGGTTAAATACCCATCCACCACCATCCATAATAATATATCAGTCCCCTCGGTACCAACAACATCAACAGAACAATTATAGCCTGGTTGTATTCTCGCGCCAACAACAACACTATAGCTTTTTGTTGGATGAAAGACAAGTTCATAAATGGCAGTTACACAATGTGTCGTCAAAACTGAGCTATGGCGTCAACCCGACAACT…
CLocus_14735	1	193	46.19	13.02	222	10202	TGCAGTAATCAATAGTCCACTTGTTGACCATAGTGAGGGGCCCTTGTGTAGAGTGTAACAGAGCGCTCGTTCGGCCCCGCAGAGTGGAGTGCTCTTTGTGTCTGAGAGAGAGGTTAGGGAGGGCCCGATGAGGAGATTGTCTCTCTGTGTGACACAGGGCAACAGGTTCATGTCCATTATGAAAGAGGGAGGAGAGGATATAGAAAGGACAGTTGATGTCCTTGTGATAGACTGAGAGACCATAATGTCCCCCATCAAGTCCAGGAAGAAGAATCATCTCCCATTTTGTCTTTATTTCCTTTTATCCAAACAATAAGAGTGGAGAGAATTAATATGCTAAAGAAATACATTTTTCAAATAAGCAATACAAAAAGTACACTGATGGCAAAGTCCCTAACC…
CLocus_53651	1	194	46.19	13.02	74	35152	TGCAGGTCCTGTTTTTGCGTCGCTGGGTGATTTCCAGCACCTCCTCATGGTTGACGCGGTCCTGGCTGCCATACTCTGACATCACGTGGTTGGTGATGAGAGACAGGCCAAACACACGCAGACCACTGTGACGAGCCACTATCACTTCTGGCACTGTACTCATACCTGAGTGAGAGGGAGCGAGAGACAGGGAGCAAGACAGAGATAAAAGGGAGAGGTCAGAGGGAGACAGAGGGAGAGAGAGAAAGTGATATAGGAGGGCGTGGGTGTGTGAAGACAGGGGATAAAGAGGGGAAGGGAAAGATCGGGGGAAGGGGAGACCTAGAAAATGAGTAATGTCAAAGGATAACATGTACAGCTTCCTCCCTGTCAACCTGTTACCCTCTAACTGACAACACT…
CLocus_93506	1	195	46.19	13.02	88	55746	TGCAGTCGAAGTGGTCGTGATCAGGGGCACGGAGAAAGGAACACGCCGTCAGGTGTCAGATATAAACACACGGATAGGCGCGGTAGTACCACGTCAGACTGTGACACTGCGCATTTCTGAACCAATAAGCCAAGCTTCTGCAAGTGCAGCTAGAACAACGCACCACAAATAACAGACATGCCTACCTAACGTCATTTTAGATTTCATTCACAGGCATTCAAATTCGTTCATTATTAAAGAATATGAAATATGGGATTCCCTTATCTTTGTGCGCGTTTCCAGCAGCATGCCCCAGTCAAGGTGTGTGTGTGGCTGAGCTTTTTATTTATTTAACCTTTATTTAACTAGGCAAGTCAGTTAAGAACACATTCTTATTGACAATGACGGCCTACCAAAAGG…
CLocus_19962	1	196	46.19	13.02	95	13752	TGCAGCGGCAAGCGTTCATCTGTCGTCACTGGCACCAGGCCTGGTGATTTACAGTAGGTGCAGGGAGTTCTGGCACTGCACCACAATATGCCCATGGACATTTGGAACCGCTGCAATGCGCACTTACAATCTCCAAGTCCTCATTGTCCATCTCTATGCCAGAGATCAACTGCTAAGAGATGAGCATCCGGATGTGTTCTGCATTACTTTGCATGAAAAGTATTTAGTCGTTTCACACAACCACAAGATCAAAACAAATGTAAAAGCACTGGGAAGGAGACAGAGCAGAGAGACTTCTGACAACAGAACAGAGAAGTCTAGAGCGAAAACAAGAACTATACAGATGGGGAATCTAACAGATAAACACTGCGGATGCCTGTTGTGCACAGATAGGCCTCC…
CLocus_145386	1	197	46.19	13.02	131	72199	TGCAGTCCTCCCTCCATTCTACTCTCTCCTCTGCATATCTCTTTTTTTCTCACGTTTATTTTCATCTCTTTTTTCTTTCTTTCCAACTGACTATCTCTCCTCCTCCTCCCTCTCTCTCCATCTATCCCTCTTATTATATCCTCCCTCTTTTTCTACTCCCCTTCCCCCTCCCTCTGGAATGGAAATGTCATTTGTTTCCTCAACAGCTCCAGGCAGACACAGCCAGAGACCTCCACCTGTTAGACACTGATAACAGCCACACACACACACACACATTTGACCCAGTTTTTCATGCATCCTGCCGCAGTTGTGTCTAAAGCTGACAGTAACATTTACTTCCTGTGTCTTTTTGTGCTTGTGCTGGTGTTATTTTAGACAGAGAAATGGAGGAATAAAGAG…
CLocus_47088	1	198	46.19	13.3	112	31107	TGCAGTATGTGGATACAACTTATTTTTGCTATCACTGTGTAATATGTTGCTAATAGACCGAACATGTATTGTTTTTGTCATCATTTTCTGTTGTTTGTTGCAGTCATTTTTGTTTTTTTGCTATGCCCAATGAAATTTGGAGAGATTTAGTATTTTCCTTTGTCTGATGCAACAATCATAAATTATGTGTATGTGATTTTTCTATTTAATAATAATTTATTGCAATATATTTCTGACTCCAAGATATAGATTATATCTGGAAGATCCCTTGCAATATGCTTTGAAGGAGAAATCTCTGCACTCCCAAATACATTGTTTTAATCTTGAACTTACATTGAGCTCTTGAAACTGTTGAAACTGAAATGAGTATGCAACTGTGGCCAACGCCTGTGATTAAAA…
CLocus_34012	1	199	46.19	13.3	86	22954	TGCAGGCATATTCTCCTCATGAACCATACATCAGATTCACTCCAGATGTTGTGTTTAGACTCATTACAAAAGGCTTTTAATAGTTTTTTTCTCTGCATTAAATATGACCACACTGTACCTATAGATGCACATATGCTAAAAATACTTTTATAATCATCTTCAATGCTTTAACTGATTGCACATAAAGGAAGATTGATCCTACATGATAAAGTGCTTGCTTTGTTATATCCAACTGATATTTTCTCCTTTGTCATCCTGTGAACCCTCTTCATATTGCTGCTCGCAGCTATATTTTTGTGATTTCACATTTAAACTATTCATCTTCAATATTCTTATATGCAAGGATTCTCTACGATTTGTTTTTGATGGCTTTTTGCCCCCTTGAAACATTTTTGACAC…
CLocus_69677	1	200	46.19	13.3	13	43965	TGCAGTTGCCAGGTTTATGGCTGGACGCTGCGGTTGCCAGATTGATGGGTTATTCCCATAGGAGGGAAACCAAACAATTCCTAGAATGTACCTTCAGACTCCTGAGGAGAAATATACAGCATCTTGTCCCTTTAGTCAGGTCAAGCTGGAAAGATGGATGAGCTCAGGATTATGGGGGATGGTAGTTGTGAATACAGGACTTTGTTTAACAGGGCCTTGGTCTCTCTTCACAGCAGCATAGACAGATGAAGCTAGACTGAGAGTAGGTTTGGCTGCATGGGCCACTCTGTCACACACTGACAGGTTGGATCATTGACTCATAGGGAATGTAATCCAACAGTTGTGCTCCTCCAAAAATGTTAACTATGGCAGATATGAGAGGGGTGCAGGTTGTGTAAG…
CLocus_19200	1	201	46.19	13.3	142	13206	TGCAGCCCAAACAGGTTAAGGGTAATTTTTTTGTTTCTGGCTCTGTGCTTGAAGGACATTTTATTAGTTTATTTAAGTGCATGCACATTGAGGAGGTAGGCCTACTATCTACAGAAAAGTTTATTTTTTTCTCATTTTATGTGTGTATGCCTTGTCCTGATACACACATTCTACCCTTTCCTTGTTGTTGAACTTGTTTAAAAAATGTATGCAGTCTTGTTAGGGCTGTCCCCGACTTTAAAAAATCTTCATCGACCGAGAGTCGTCTGTTCTTTTGACCAGTCATTTCTGACTGGAAAGTTCTGTTACTGAAATCCCTCATTTGTTTAGGAAAACATTCCCTTTTCCCTTAACCCTTGCTCTCTTTATGTGATACATGTATGCATCGCAATACATAGA…
CLocus_132837	1	202	46.19	13.3	93	69254	TGCAGAATTGAGATTTGGATTAAGATAATCCATTTAGATGACCATGGCTCGGTTGTAAAACTCCAATGGTAAGATCAAACAAAAATGGGTCAAGTAGTACTGTACAACCAGAGGGTTCCCTTGGAAATGCTGCGTGTATAGTTGTAATGCATAATTGTATAACGTCCCTGCATGCTTGTTCCACCTCTTTCATTTGTGAGGAATAACCTTTCAGGCTTGATTTAATAAGGTCGCTCCAAACTAGGTAATTCCATGTAAATCTCAGATATTACTGCTGAAATTCAATTGTATTGAAGACCAGGCTCATCTTCTAATCCCAGCCTCTGATAAGCACAGGCAATTTAGGCCCACAATCAGATTGTCTAATGCCCTGACACATCATTGCAGCAGATCATTTCC…
CLocus_30038	1	203	46.19	13.3	168	20402	TGCAGTTCTGAAATCTGTGTAACGTGGCAAGTGTATTAAGCGATTTTGAATGCCTTTGAGATTTCAGAAGTCTGGGGTCTCAGGCTGATTCCTGTGGTTAAATGATTGTATTTGGCCTAGCTTTAAACAGACAGATATTTTAAATGTGCTTTACTGATAGAGAGATTCGCTGTAGACTACAGACACAGAGGTAAGGGACAAAAATCTATCATGTTCAAAGGGATTGTTCCTCAGGGCAGCAATTACTGTTTTACAATGACTTGAATGAGATTGGAAATGCTTGAAATTCAATTACTTTTTATTGTTTTATTGTATTCCATAATTGGAGCCAAGGGAAATAGTTTTTTTCTGAACTGAACCAATTTAGTAATCTGGTTGAACAATAAGCAGTCTTATATT…
CLocus_54653	1	204	46.19	13.58	38	35717	TGCAGTGTCACTCAACCATACTGCCACGATATAAAACAAGAGGGAATCACCACTGCACTGCATTCATGATCTAGTCTATCTTACAGTGTCTACTACTTTAGGTCTTCACTTCATGCAATGGTAAATTCATGCTTAATCTGTCATGAAATGTCAGGAATTTTGCACTATGCAAAGGTAGCAGCTGCATTCATTGAACTTGTCATTGTTTAGATTTGAAGTGTTTAAGAGAGAGACAATGGTTCGTCATAAACATTCATGTCCTTCAATGTTGCCAGCGAGTTTGAGAGCTAATTACTGTCAGACCTCTTAGGTCCCTGTTCAGTGACACAGGAAACGGCAACATCAATAAAAACAACATGAATGGTTTAGTCTAGAAAGTTAAGGCCTAGTTTAGGATTG…
CLocus_12202	1	205	46.19	13.58	39	8324	TGCAGCCTCTGCATCCGCTTGGCTTCACGGTCCCGCAGCCGTCGCAGCTCCCGCTCCTCGGGCGACTCGTGCTCCCGCTTGGTCTTCTTGGCGGAGCGCTCGCGCTCTAGACGGTGCATGCGTGCCTCCACCGGCTCGTTCTTCCTGCGCATGGCCCACTTCCTCATGGGAGACTGGGCGTCCACCAGCTGCTGGTAGGCCACACAGCTGTTGCACACCAGCAGCACTCCGGCCGGGTGCACAGGCATGGGGCTCAGGATGTCTGGCAGCAGAGGTAGGCCTGGTGAGGGGCTGAGGGTGTCAGGGAAGGAGGGGGGCGAAGAGAGGAGGCTGTGGTGCAGCGAGGGGAGTGGGTGGCCTGGGAGGTGTCCGGGACCTTGGCCATGGTTGTGTCCCTGG…
CLocus_22520	1	206	46.19	13.58	176	15481	TGCAGGAGTTAATATTATATTAGGCGATTGTGAGAGGTTATAGACCTACAGTCAATCAACATTTCAGTTAGGCTACCATTTAATTTAACCCATCTGAACAGTAGTTCCCTTGTTGTGCCATTTTGAATTCCCCGTCTTGAGACTGTGGAATCATCACACACGACATAGCAGTTCTGGCTATCATCCTTTTTTACCACTTCTCTACATTTTCCCCAAACATCAACTCTCCAGTTCGCAGATTTTCTATTATTGAATTAAACTCCGACATTGTCCTTTTTGCCTCATTGGATCGATTTGAACTTTTCTGCCCAAGTTCCCAAATGCATTTGGCAATTGCCGTGTATTTAGGTCGCTACAGTTAGTGTGTAGCCTAAGCTTTAGGGCCTAATGCCAGACAGA…
CLocus_37006	1	207	46.19	13.86	133	24777	TGCAGTGCACTGGATGTCTACATAGCCTGACTCTTTGTGGAATATATCAGGGTTTATATAGTAGTCCTTATTTGTAGTCCCTTCCTGCCACTGCTTTAATGGTATTTGTTTTGTTCTGCTCTGAGAGTATTTTGGGAATCTCAGTGGGGAGTTTGGGTTTTAGGAGGATTGGGTGATTTGGATCAATGTGGCTCATTTTTCTTCTCGCATACAGCGATGCCCTCTTTTTTTGGCACATTTGAAAGAGAACGTGGGCATATCAAACACTCTCACACAAGTGCACGCACCTAAGAATGCACTCACTCACACACACACAAACAAGAAAACAAACGCATGCACACTAAGAAACACACTCTGTACATTAGGATATAGAGTACCTAGCAACTCTACCTGTTTTCC…
CLocus_3302	1	208	46.19	13.86	350	2449	TGCAGCACCTGGCGCTCCACACCTTGCTCTGGAGGAGGGAGGGAGGACCGAAGGCAGGGGAAGAGAAGGAGGGGAGTGGAGAAGGAGAGGAGGGAGGCAGAGGAGGAGAGGGAGAGAGGAAGGAGAAGAGAATAACAGTGAGCCTGAGGGGATATGACCTGGGTTCTCATTAGCATCCATGCTAACACTCCCTACCTGTCTCTCCCCATGTACCAATAACCAGAGAGCAGCACACAGCTAGAGCTACAGCAGACCATACTGCCACAGGCAAGCAGCACACAGCACACAACTCACTACACAAGACTCATTACAGATAGTGTGTGTATGTATGTTTGACTGTTTACATCCTATTTGTTGGACCAACGAGAGTAGTACAAAACGATAAATGCCACCCTCTAG…
CLocus_107581	1	209	46.19	13.86	117	61415	TGCAGAACAGCTGGCGTGAATGCGCTAACCAGATAGCTCAATATATCTCAACCAGATCAAAAGTACCTCCAAATCAAAGCATAGCAAAACCAACAGGCTCCTCTCCAATCCATCTCAATTACAGCTAAGCCACATGGCCTNNNNNNNNNNCGTAAACTAAAGCATAAACTCATCTCTATCTTAGCATACTGCATACATACTTCCCTATCCTACTCTCCACCCACCTTGAGACCTCAAACGGGTCTGCCAAAACCCCATGATTGACTTTTTCTAAGAACCAAACTCCAATCACCATAGAATCCTCATAGACAATCCGCTTATTTCCATTCCCCAGATTTGCTTCCTTTCCATTCTTCAAAGGCATAGCAGTCGCCTGATCTTTCTTCTGACTCCTCTCTT…
CLocus_32336	1	210	46.19	13.86	132	21911	TGCAGTCATGTTTACTGATAGATCATAGTTCCAAAGGGGCTGAGTAAGACTCCGACAAAAGAAGAAACTAATTAACAATGTGAATTTCCTTAGTCACTGTGTTGAGCAATCGATGTAAGATTACAATTTGTCATTATTATGGATCTGAAAGGATATCCCCAGCTAATTGCTGAATTATGATAGAGCTGAAAAGAGCTTTGAAAGGATTTGGCCAAGCTGAAGATGATCAGGTACAATGTGGAGATTAAACTGATGAGATATTGTCTGACTACTGAAAGCCTTGTAGAGAGAGTGTATCCTTGGACATGGAGTAATACCACTCATTTAATTGCCTCACCTGTGAATACTACAGTACTGTGGATAATTGTTGCAAAATCTCTCGGGACTCCACCTTGTTCT…
CLocus_36977	1	211	46.19	13.86	227	24764	TGCAGATCTCGAGCAACCCCAGTTCAGCTCTGCTGTTGCATCAGTCAAAAAGACTGACATGCTGCTGCGGAGACACCCATTAACTGTTCAGCTAACCAGTGCACTCCCCCTTGGTTGTTGTTCAGTGGGACTAGGCCATGGTGAATATAATCTATTTAGACCTACAACTACACCATAAAAATAGGGCCTAGGCCTATATTGTACTCTAGTATCTGTCTCTTTTTTTTAAATCACCATCTAAGTGATGAGTGTGTTTGTTTAAACATTAAATATTGCAATTACTGCTGGCATTGTATTGGTAAACACTTCCACTGAATGCATGAATGGCTTTCAACATAGGGTATCAGGAATTAACCCTTTTTGTGTTGTGACATCAATGAGGCAGTCTTTATCCTCTCA…
CLocus_2962	1	212	46.19	13.86	200	2238	TGCAGCCAACAGCAACAGCGACAACAGCAACAGATTCAACAACAACAAATTCAGCAACAACAGCAGCAACAAATTCAGCAACAACAAATTCAGCAACAGCAACTACAGCAACAACAACAGATTCAGCAGCAACAGATTCACAGCAGCAACAAATTCAACACCAGCAGCAACAACAGCAAGTGTTGGAGAACCTGCGGCAAGAGCTGTTTAAATCACAGATGCCAATGCATTGTGGCATATTCCAGGGCGGTTCTCGAGGTGAGAACGCTGAACAGCAGGGTTCCCAGCAGGGCATGGTGCAGAACCATGGTTCCGTCTTTCAGCAGGCCCAACAACAGCAGCAGCAGAGGCAACAACAGAAACAGCAGCAGCAAGCAGCACTCTTTCAGCAAGCCAATG…
CLocus_57866	1	213	46.19	13.86	234	37599	TGCAGAAGGTGGATGAGATCATGAGGCAGGGAGTAGAAGAGACCAAATCAAATGAAGAAAGAGAGTTGTGTAAAAAGGATGGGGATAAAAAGAGGGAAGGAGGGACCAATGTGTCAGATGAAAAAGAGTTCAAAATGCCTAAGTGAGGTGGTAGAGAGCAAGTCAAACAAGGGACCAACTACTGTGATAGAGGCAGGGGAGACCACAGTAAAATAAACGGGGGACAGTCCATGGGACTGAGTACAGGGACCACATCACAGCAGAAAACCGCAGAGGGTGGAACATCGAACCAAAAAACTGAGACCCCCTCTGTGTGACACAAATGGACTGACCCAGCAACGTGTACTTTTTTTCTCAACCATGTTTACATTTGCATTGCACGTATTGTATGATTATGTA…
CLocus_9604	1	214	46.19	13.86	49	6450	TGCAGGTGAGCAATATGTTTGGAACATCGAATCGCAATAAAATCACATCATCGAATTGCAATACATATAGAATTGTGAGAATCGCAGTACATATTGTATCGGCACCTAAGTATCGTGATAATGTCGTATCATGAGGTCCCTGGCAATTCCCAGCCCTAGTGTCCTGAGAAGTGCTTTTTCTGTTTCTCACCTCTCTGTCAGAAATGAATGGATCGTGGCTGATGTTGCAAAGATAGCGACAATGGAGAGAAAGCACTGGGGGCAAAAGGAGAGAAAAACTAGAGAAATTATTCAGGAATGATACATACCTTGTCCTCCCTAACCTTTTGGAGAGAAAAACACTTAGACTTTAACCTCAAAGAAAAGGTTTTATGTGTGGAAACAAAGGTGTGTGCATAG…
CLocus_112991	1	215	46.19	13.86	107	63522	TGCAGGAGACCCAACACACTGGACCCAGTTTACATTGGAACGAGCCAGGGATTCTCTCCACGTTCTGATGCTTATTCTGTAAAGCTACAGTACTAATATCCTCAAGCTGCTGGGACTTGCCTTTAGGACTAGTGACTAGACGTGCCTTTAGGACTAGTTACAGATATCCCATATGGGAGAAATGGATATAGAAACTCCCTCAGATATTATGGACATGTTGACCTACCTGGCTAGGGAAATCTAAAATGGCAGGGGTTTTTGAGTGTGTGTTTGTGTGTGTGTGTGGGGGGGGGTCTATAAATATTTCCTCTGAACCTCTGCTGGTTCAGGACTTGTAGAGTAGGCTGGGCGGAGCAGTAAACATAGGCAGGCTGGCCGGCCAGCTCAGGACTGATGAGT…
CLocus_43542	1	216	46.19	13.86	18	28966	TGCAGGCTACACACAAAAGGGCTTTAGAGGCTGTGGAGGCTGTTTGCACAGATGGCCACTGGTGGCTCAAAGGAGGCCCAGGAACCGGTCTCAGAAAGAACAGCTAGCTGCATATGCTCTCTAATGCTTGCATAAGTGATGAGTGACTTACATTTCACTGCTTTGCATCAACTCGATGAGGTCACTGAAGAGGACGTCACGGTTCCTCTCACAGAAGCCCTCTGCGTCGTAGGACACCTGGAGGAGAGATGTTAGAGGGTTAGTGACGATCATAGCACACAGTTAACCCATTCAGATAGCAGTTAGTACCCTCTGCTCAGTCCAGGTGCACTATCAAAATTAACAGAGAATGTTAAGAGCAACAACAAAGAATTCATTGACAAAAGAGAAACGATTGAC…
CLocus_39724	1	217	46.19	13.86	270	26508	TGCAGACGGAAAATGGGCTTGTTAAGCTACGGTGCTCCAACCAATCATGCTGTTGGAGCGCTCTGTTCACTCAGGGAGCCCTCTCTAGTAGCTCTTCTGGAACTTTCTGGAGATTAATGTGTCATTTGTACAGGTTGTGCAGTGTTCCCCTGGTTAATCTTCTCACGGTGCCGACTTGCCGGAACAGTTTTGACCAATTCTTTTGTTGTTGAAATCCTGTGAAGTGCACTGTAAAATGTTATTTTGCCATATCGTACTGACAAGAACCCCAGGAGTGGAGCAACAGTTGAGACATCTTCCCATGTTCCCAGGACGCATGTTCTTCTGGAGGGTGCAGAGCAAATATTGGCATTTCCTGTGTCAACAAATGCATAATGATTGTTTATTCAAGAGTTTGTT…
CLocus_95179	1	218	46.19	13.86	26	56421	TGCAGTCTGATGGGCTTGGAAGGTAGGCTACTGTTTCATACACAGTACAAGGCAGGTCAAGGCCATTGTAACTCAGTCCTACAAGGGAGAGCAGCTCCAGAGGCACCGAGAGGAAACTGAGAGTGTGGGGTCAGGGAGGGTCCTGGGATGAATGAAAACCTGGTCTGTCAGATGTGCACACTGCCTGGAGAGTCCAGGAAAAACAGAAACTACTAGTCTATGGATGCACTATTACAAGGATTTCAGTAGATATCTTGCTGAAAGAGCTATTGTTCTGTACATGCTAGTGTTTGATGTGATAGCTGAAGGCTATGCAACCTAGAACTGGACTGTTGTTTGTTTGTTCAGAGTTTGTTGACTTTCATAATCCCAAATGGCAGGCAAGTCCGAAAAATTGTT…
CLocus_11522	1	219	46.19	13.86	78	7802	TGCAGGTCCCCTCCTGTTTGCTCATACTGAGTTGGCAGAGGAGAGAAGAGAGGCGGGAGCAGGGGCGGTGGTTCCCCGTGCCGGGGATACCCAGGGGGAGTGTGGGAGTGTGGGGAGTGCTGAGGGGACACGTCAGCCAGGCCGATGCCAGTGTAGCGCCACGTGGGCCAGAAGGCGGGCACGGGGGCGGGTACAGCGGCGTGAGAACCTCTCTCTGCCGAGCGAGGGAGGGCGGGGGAGAAAATGATACAACAGCGGATCGTTAAGAGACTGGCATTGACTGTGGCGTGCTAATTTATGCAAATGAAAGTCTGAGCCCATGGGAGAGGAAGGGGTGGGGAGGCGGGTGTTGCTGTATGGCTGGTAGCCAGCATCTAGCAGTGAAAAGGTTAAACAGTC…
CLocus_55524	1	220	46.19	13.86	22	36229	TGCAGCCTTCAAAACACCTGTCAGGAATGGAGAGAGAGGTAGAGAGAGGGAGAGAGAGGACAAACGCCAAAGAGAAGGGTAGGAGAGAGGGTGGTGTGAAGAGAGAGAGGAAGGGGGATTGACCCACTTTAAGGCCTTGTAGAAGAGGCTCTCCGGGAGCTCGCCTAGCTTGTTGTGCTGGAGGTCGAGTACTTCCAGGGGGACGTGGTCAAGTAGGTCAGGCAGTCTCTGGAGCCTATTGTTCCCAGCCAGCAGCTTCCTCAGACTCAGGCTGCTGAGCAGTCTAGCGGAGGGAGATGAAAAGAAAGAGAAAGAGCTAAAGAGAGAGAGAACATCTCCTGCTGTGAATTTGATCACTTCTGAAACTGGGGGAAATCTTGATGTACAGAAACTCCACAG…
CLocus_101926	1	221	46.19	13.86	46	59153	TGCAGTATAAAAATGGCACAGATTCCTCTGACATTATTATAAATTAAAAAAACATTCCTGTGGGTCAGAGTTTGTGTTCCTATAGAACAGCCATCCCTTCCTGTCCCTAAATTCTGAGTTTGGTGACTTTCATGTGAAACATGGACCCATTGCCATGCAATGTACCTACTGAGGAAGTCTGGTTTCTAAACACATCCTGTTGAACCCTGGGCTGGCAGTAGACTAGTTCAGCTCTGAGTGATGAACCCACTCACCCTGCCTATGTTGGCCTAATTCATCTATATCCAAACTGCACTAGGTAAACTTCAACATGTCTGATCTAATTCGTTTAGTGGCATGCACCAACCACCACAGCTTGAGATTTACATGATTGATTGTATATATTTGCAGGATTTTGTC…
CLocus_55579	1	222	46.19	13.86	267	36258	TGCAGCCTCTTCAATGGGTGTCCATGAACTAAAAACAGGGGGAGTGCCTTAAACAGTGTGGTTACCATAGGACCACATGGGGGCACAGTAGTGTAGTGACAGAGGAAGATATGTGCTTGCCTCAGGACCATTAAACCATCACATCAGAAAGGGTGCAACAAAGTGGAAGAAAGAGGAATAAACCGAGGGGAAGAGAGGGACAAGGGGGGATAGAGAGGGAGAATTGGCCTCCTCTCCTCATAGACTTTACTTTGTAGCTGGGATGGATTTGTGAAAACAGCCTGACCCATCCTCCTGCATCTGCATACCTCACATGGGAAACCAGGTCACTAGCATCTGGAAACACTTCCCAGACACACCAATCATCTGTGTTTGACCTGGATTCCTTTGAAGATGGAA…
CLocus_28627	1	223	46.19	13.86	171	19479	TGCAGGAAACTCACCATGTTACTACATAGGACTGACAGACACAACCAATAAATACATGTATTCAAACCTGCATGGGACCTGCTTAGAAAATATGTGCATACGCAAATACATACTGTGTTGTGTGCCTTTGGGAGCCCGGCATAACTGCTTTTTCAGTCTACCTAAAAAACGTAAATATCTTATTCTACAATAAGCTGGTATTGTCTGATTACTGTACATCTCCAAACCATGCTGGTGGTGGTGTATTTTATCCATTGTTTACATTTGTTTGTGTGCCAACTTTTTAGTGGTAGGTACAATTTACAGAGGATGGTTTTAAAGGTCCATACCATGAAGGTCAAGTATGTGGTGTGTACTGCCAACATAGTCACTCACCATGTCCCCCACGTACACAGATTG…
CLocus_15303	1	224	46.19	13.86	218	10565	TGCAGGCTGACACAGCCTCGCAAGCCAATCGCAGAATGTGACGACAGAACTGAAGCAAATCATAAAATCTGGCAAGTTTGATTTCAACATTTTTTACATCGCACATAGAGTGTGGGAAGGCCTTATGTGAGACATTATTGCTCTGTTTCAACAACCATTATTCAGGATGAGTCATGAATCATAATATTAATATCCTGGCTCTTAATCCATGTGAATAGGATATGAAATGGAACAGACTCATAGGTTACATCTGTGTGAGTCCATAAAGATGAGCCTATTGACTGTGTCAACAAATGAAGTGAATGCATACAGGATTGTATTTGAGCTCCCCAGTGTCGCAGCGGTCTAAGGCACTGCATCTCAGTGCTAGAGGCGTCACTACAGACACCCTGGTTCGAA…
CLocus_29475	1	225	46.19	13.86	81	20021	TGCAGGTATTAATGTTTCAACAAAGGAGTGTATATATTTGGCCTGGCAAAGCGGTCTTATGTGCTGACTGAATGGAAGCTGATAATTAAGAGTTTTTTACTGCGCTGGTCTCGGCTGGTCTCCAGAAGAAATTACCAGTTGTCACTATCCAAGACTGAGTCAAGACTGAGCACAAATGTATTGGACACGGAGATGAGACACTCAAAATGTTGTCTGGAGACCAGACGGGCGGATGGTCTCGACTGACTTGCAACTTAAGTTAGGCTACATTAAACTTTTAAATATTAAACATTCATGCAACACTGTAGTTTCCCAACATTTCCTGACCTCAGTGTTCACATCCATTGCACCATGCAGACCTCTATCAGTGGGCTGTGTGTGAGTGGGATGATAGACTTA…
CLocus_46523	1	226	46.19	13.86	194	30711	TGCAGTCTTGGCCCTGCACCTCGTCCACCGCTTCACCTAGAAACACAGAGAGAGACAGTGTGACCAGCCGCCAGACGACCCCAAGGATTCACCTTAACATACTACATCAACACATACTAGACCCACGTCACAAGCCAGGCTTAGAGTGCCAAGATGTTTGAGAGTGTGTTTTCAGACCTAGACACAGGAGATCCACAAAAAGATGGACACAAACAAACAGAATTTCAGTTAAAGATGCACTATGCAGAAATAGCTCCGCAATTTACTGATTGCTAAAATTCTAATAGTTCGCCTGATTTCAGTTTGGTGACAAAACAAGCAAGTATAGTATAGAGAATCATTGTACCTTCTAAACTGCTTTGAAGTATATTTTCCATAACCAAAAATATTGTATATTCA…
CLocus_57846	1	227	46.19	13.86	182	37592	TGCAGACCAGTTGGTTGCGACAGGGGGGTCAGAGGCCCCCCAACCCAACAACATCCCCTCCTCCCCTCATCCGCAACCTCCAACCACCCTCATCATCATCATCATCTCTCTCCTTCTTATTTTCCTCTGAGAAGACAAGTGATTGACAGACTGACTGAGTTATGCTCTGCTTGCGGGAGGTAAAAAAAAAGACTTACTAGTCGCCAAAGTTACGGAGCATGTCTTTAACACTAGTGTCTGTCCTTTTCTGACTGACTGGCAGACAGGGTGTTTCTGTCCAGGTATGAAAAGAAGGGTAGAACATTCCACCCTGGTAGTTATCCTTACTGCGCTACACAGCGGGCTACAATACTAATGTAATGAGCAGTAATTAATGTGGACAGTGGACACAGAACAAAC…
CLocus_12278	1	228	46.19	14.14	31	8402	TGCAGAGCTCAGTTGTGAAACATTGCGTATTGGAGGTAACCTTTGGCAAGAAATTGAGAACATATGACCAAAGAGAAGGAAAAAACAAATACATACAGTATAGAACCAAACATGGCAAAATGTGTACTTTCATCTATTATATACCAAACAAAAAAAATATCCCCCATTTTTTTTAAACAAAATATATATTCACATGTTGCATAAATATCAATTGGAATGAGGTCAATGAAACATAAGACCAGAGATCTCTCCCAACTGGTCGAGGGTCAACGGGTTTAATAATGAGTCTAGAACATGCTCATTGGAGAGTGGAACTCTGCAAAGTGAGATCACTGGAAAAATGCAAAGATTAGTTATTCAAAATATAGCTTTTACCCTGACACAAGCAGTTGAAGTCAG…
CLocus_8644	1	229	46.19	14.14	167	5835	TGCAGCTTGAATTATACTGGCCTAAACCCATTTGTAACGATGTTCAAAAGGCAACTAGTGAGTATTATGATGAGAACCTCAGAGGGCCACTTTATCTAATTACTTTGAGGTTTTTGGGGGAGCAACAAGATGTTAAACACATGCGTCACACACATTTAAAAAAAAATTACATTGCATTATTTACCAGTATCTAGATATTGTTTTATGTGTTTCAGCTTGAATGTTGTTCCTCAAAATAATTGATAAGGATTTTGTTTGTGGAATGTCTCGAGTGAATATGTGTAAGCCTTGTTATAGTGCTGGAGCGGTAAATACTGTACAAACAATAGTCTGTTAACAAGGTAGTCCTTGAACATATAGTCATTGTAATTGGTTTTGCACTGTTACATTGATATGCAC…
CLocus_111175	1	230	46.19	14.42	60	62854	TGCAGCTCTTTGGGGAGAAGGTCATACACTGATTCTGTGTAGAGAGAGGGGGGGGGGGGTCGTTCAGGAGGTGAGTCGAGTCCCTTTGTAAGGACTTGAAAGGCTGTTCAAAATCTAACAGCATGAGAGCGCTTGCAAAGAAGTCAGCAGATTTACTGTAGATGAAGCTCTTTCAGAATTCTAAAGAGAAGTTTAAATACATCAAAGTTGCAGCTCCTCCTTTTCAAAATTTGAGTAAAATACAATTCTGTGAGTATAGTTATTTTTTTCCTTTCACCTATACTTATAGGCTCTCCTTATAAACATCAAGAAAAATGTTAAACAGCAAAAACAATAACCTTCATAAACATGGTACAGCATGCCTTTGTCAGTTGTCACTGACCCTGTACCAGGCCCAGA…
CLocus_14396	1	231	46.19	14.42	65	10015	TGCAGCTTTGTTATATCAATGATGAGTCAATTAGCGGTATCCTATCCTCTAACATCGCCGGAGCACAAGTGCAACTTTATAGAAATGTCATATTCACAGTCTACTGACCCATATTATGTGGATGCCTTTATTCAAAGCAATGTCCATGACTGACATATTTCACCATGTCTGTGCTAGATAAAAGCCAGTGCCATACTGTGGACCACTCCATACCGCAGCAACACTAAAACCATTAGCAAATGCCCCAAATAAAGTCTGAACTCAAATTCTGATGCAAAATGAATGGTTACACGCAATACTTTAGTTTTTTTCAATCTTTTTTTCACTCTTCTCGTGACACAAAAGTGCTTTGCTCATTGTGATGTCATCACTTCATTATCCAGTGAGGTGTCTAAGTTA…
CLocus_44338	1	232	46.19	14.42	19	29389	TGCAGTGCTACAGTGATTATTTTTTCTTCCAACACGTATGACTCCATACCACTGAAATTACTCTAATTCAGCAGGCAAAACCAAGGTCACAAACACTCTAATTGCCTGCCATTTTGATAAACTCTATCAACTTGTTTGTCTCACATTCCAGTTTGAAAAGCAGGTGAGGGGGCTCTTTGCCCGTTTGTATGTTCCGTGCATTTGCATTGAAAATTTGGCTGTTTGTTTTCATATGTGTCTTTTATAACCAATGCCATGACCCTATGACCCCCTGCTATGGCTGCCATTGTCCTTTAGAATAGGCCAGAGTAGAACAGGAAGGAGATTCAGCGTTTATAAAGAAATAATGCAGGCCCCTGATGATTACAACATATTATTTTATATATTATATTTATAGCT…
CLocus_39960	1	233	46.19	14.42	28	26654	TGCAGCCTAGCCTCCTGTCCTTAAGGGGACGGTGAATGTGCTGCTTATTTAGAAGCCGGCGCGCAGGCAGGCAGTACCTGGGCTTGCAGGCAGGCTGGTTAAACACGAGGCAACATCCACAGTGCATAATACCCTCTCTCTCTCTCTCTCTCCTCCACACACACATGCACGCGTTCTCTCAGAGGTCTCTCTACCTTGGCTAGGATAGCAGGCAGTGTGAGAATATACACACAGGAACACACTGAGCTTGGCAGGCTGCTCCGTGCTGTCTCCTTCTCTCTAAGTGTTTAGAAGGCAATTTCAACAAGGGATTGTTCCCAATCTACTAGGGAGATCCACATGGATGAGTTATAATATGCTTGCCACTCTCTCTCTTGCTCTCTCTCGCTCTCTCGCTCT…
CLocus_22250	1	234	46.19	14.42	184	15285	TGCAGTGGTCCCACCCCTGTACTCTGTCAACACCCCTTCAGTACACAGCTAGCTATGGTCAGCTCATATCCATACTGGGGAGCTGGCGCTCTGCCTAGTACCTCGTGCATAGTAGACTGACTGCCTACCGCTGTGTATGACTGGAGATATGAGATTTGGATAGCGGTTGGTAATGGATTTTTATATGTGTGTATGGCTAGGGGTTTGGTGATGTGTTGAGGTCCACATGTTCTGGTGAACATGCATGGGGACAGATGCACTTAGATGTTATAGAGAGAGAATGTGTATCTCTTTTTAATGATTCACATTGAATTCCTATGACAGTCCATTAAACAATCGCCAGAATATAATGGTATATATTTTCTCTAATTGCCAGGCTGTATGTTATGCAATAGATTG…
CLocus_25831	1	235	46.19	14.42	52	17482	TGCAGCATTAGCCAAACCCAATGGCATTTTGTAGCTTTTTTTCCTTTTGTGCGTGAAATTCCTTTATGAATCAGAGCCCTCCACCGCCCGAGAGCCTTATGAAAGATAGCTCATTGATGTCCATATTGCGCCATCAGCCCGGGCTTCACTAGCACACCATTCACAAGCAATTAAAGTGAGCTTAAACAGAGTAAGAAAGTGCGTCATCCTCTTAATGCAATTAAGGAAGTGTGCACACACAGACGCAGGAGAACACACCCACACCCACATAGAGCGTACTGAGGAAAGGCTAGCAGGAAAGGTTAATTTGTCAGGCAACACAAGCCCTTGGCCTGGCCTCACCCTTCACAACTCCAAAACAAGAGAGGGATTCATCAGAGAGAGAAACACACTCACCAT…
CLocus_34799	1	236	46.19	14.42	28	23462	TGCAGTAGGGACGTAATGCACAAAAAACCCCGAACTATTCTATCTTACACTCAACAAAAGAAAACAGGTCAAAAATGTAAAGAGACAAATCCATAAGGTTATTTAGTGAAAAGAAGGAGCCTGTACAGAGACATCAATGTCTAATAGGGTTTACCATGCAGTGTCAACAAAGCACAAGGGCAACAACTGACATCACTTCATTCCCAGAATCAAGGCCTTTACCGTTCAACAACCATCAGTCCTTCAGGGCTTCAAGACTACCCTGTAGGCCATATTAGCGTCATCACGCTAATATGGGAATTGAAGGTGAATTAAAGCCAAATTAGGTGAATTGAAGGTGAATTAAAGCTAAATTAGCCATTCCAGCCATTATACATTGGCATGCTAGTTTTTTTCATG…
CLocus_56549	1	237	46.19	14.42	146	36804	TGCAGTTCTAATCTAACAGTATTTTTCAATGTCCAAAATGTATTTAGCATCAATTATTATGTTAAGCAAATTTACACCAGTTAGGAAATGTCAGATTGCAATTCCAGTGATTATGAGATCTAATGAAAAGTAGCCTTCAGTTTGTCATTTCTGGGCTCAGACTGCTTGAATTGTAAATGAGACGGGGGAGGCCATTTTGTTTGGGTTGTGGACCTGTCTGGCTAGTTTAGATGGACACTGGGGGGATTTGTCCTCCACTGCTGATCTGCATCTTTTTTCTATTCCTCTCATCCAATCTCTCTGCCCCATTTTTATCTCCACCTCTCCATCACGTCCAGCCCTGTCTCATGTTTAAAGTAATCAGATTTTCCCAGGAGCATCTCTTGGAGGGCTGGATAG…
CLocus_74353	1	238	46.19	14.7	149	46466	TGCAGTGGCTGATAGAAAAAAACAATTTGGCAATAAGAATAGGCAATAGATAGTTATGACCATTCCGCTCAGGACAGGTTATAGCCCAGACTTAATCAAGATTTTGTTGTGTCACTTTTATTGATATGGATAAAATCTCTGTGTGATGAAGTTGTGAAATGCAAATAGCTATAACAAGCCTATATACAGAGTGGAATTCCTGCAAAAATAATTTTGGATGAGCCTAGCTATGACCACAGGGCTGGAGAAGGAGAGGTGAAATGTTTAAACGTAGGCTTATTTATGCGAAACACGTACGAATAGCTGTCGTTTGGTAAGCCAAGCTGACAACACACAGTGGCAGCTAGGTTGAGTTAGTAAACTGGCTAGCTCGCTAGCTTATAGCATGGTAGTAATACC…
CLocus_27629	1	239	46.19	14.7	130	18740	TGCAGGTGATTGACTATACAATAGCCAGAGTTCAGTGTACATGAGGACAACATTTTGAATTCTGTGGTCTTCTAGGGTGCCCTGCAAAACTGTTACAACGCAGGGGAAAAGCCACTTAAGGAGAGAAAAGATCCAGATGGTCAGAAAGAGTACAACGTGAGCAAAAACGACCTGAAAGAAGCTTCAGATAGGTTTCAGAATCTCCATGTGATAGTTTATGGTGAGTATCTATTCCTTGTATTCAATTCCAAAAACACTATAAGTACAGGCGAAAAGTTTGGTTAACTCAGTTGATAACAGGATGTCCTTCATATATTTTGAAATTACATCAAGCTGTTCCTTAGCGTATCGACAGAAAAAAAAGTCAACAAATTGTCATATTTAGACATTTTCCGACTG…
CLocus_52355	1	240	46.19	14.7	69	34285	TGCAGGGACAGAAGACATTGATGAATAAAATAACATCTTTCTCTACCACAAAGATGGTTTGATAATTCTGATAATTTTTAAACATTAAGTACTGTAAATGTTAATTTACCTGCTAGCATTCTGCGACTCCGGGCCCAGGTCCACCACAAACCCCCCTCCCCTGTAGAGGACCACACTGCCCCAGATGGGTTGGGCTCTGAGTCTGGCCTGGGTTTGGTACTGCCAGGGACTGCGGAGGGTCTTTGAGGTGTTTTCGCTCACAGAGCGGTCCCAGCCTGGCCCATAGGAGCCCATGTCCTCCACCTCCCATGAGTATGGAGCATGGCAGTCAGGTACAGCCTGGCGCATGGAGCGGGCGATGCGGCAGGAGTTCTTCTGCACCCTCACTTGGCGAAGACG…
CLocus_15701	1	241	46.19	14.98	166	10851	TGCAGTTATGTTTGGCCCTGGATAGGACACAGAAAGTTAATGTTAAATGAGCCTCTAAAATGTCTCCATTAAAAAAAAGAAGAAATTCAGGATCAGTGAGAGGATGGCATTACATTTCCCCAATGTTTCTATCTGAAGAGGAACTGATTCTGTTCTATTGTTGTTGATATCCTAAATAGCAGAAGTGTACGCAATTGCAGCCAATAATAGTACATATTGCAAAATCTCACCGTGAAAAAACGAGACTGCACCTTTTCTTACGATAGTCCAGTTCATGTAAGGAGTGGCTGCACTCTACTCCACCTGAAGTTGTGAAAGTTAATCAACCTGGAAAACATATTTATTAGATCATAACATTTTAGTACTGACCCAACTCTCCCGCCGAGGGTTTTGTTCCCC…
CLocus_21860	1	242	46.19	14.98	101	15080	TGCAGCAGGTCCTGCTGGGCTGGGCTCACCTCTCCCTTGGCCAAGCCCAGCACAGGCCAGCTCTCTCCATGGATGATTTGAATATCAAATGATTGCTGTTTCCAAACCTCACAGAAGCCATGGTCCCCACCCAAAACGTTCCCATATTTTTAGGAGAAGTTTCCATGTTTTGCTTTGATGTTGTGCTCTGGTGTGGATTCCCTGGCATGATTTTTTAAGGAGGGGATTGGGTTATTTTTCTTGTGTCAGTTTCATGTTTCAATATATGGTACGTGAGGGTAATGCTAAAAGTAAAAGTAAGCACATGTGAGCCTAAATCATAATTAATGAAGAGTTTTCGGGTCTCTCTCAGTTAAGGTGTGGCCTGAGTACCACCCTGGCCACTCAATGATACAGAGA…
CLocus_55321	1	243	46.19	16.12	138	36126	TGCAGAAGCTTCTTTAGAGACTAACGAGTTCAGCGTTCAGCTGTAACATGGATTCTCTTTGATAGACTGTTGTCTGATTAAAGACTTCATACACTGACAGCCCATAGGAGGAAGATACATGTGTAACAGACTGGTAATCACACCCATGGGTGAAGAAAGGTTGATTGTAGCCATTTTACAGCTGGACATTTGGTTGAATTATCTCCTCCAATAACATACAGGTGTACACTTATCATGCATAACAGAGGATTCCAAGGGGGCACTTGGTATAAGTTATAGAAAAATACATTAACATTTCTGGGTGTTTCTCAACCTCACAGAATGATCTTCCTCTCCATAATAAAAGTGTATGGATTTTGTCCGGGGGCAAAACTCACAAGATCTTGCACCTGAACAATT…
CLocus_36168	1	244	46.19	16.12	135	24249	TGCAGCTCCCCCTGATAAATCAAAATAAAAAATGGTGTTAAAGAAATCTAGAAAAATTATTAAACTAGGCCTCTATTACTCCTGTGTGAGCGAAGAAAAATATTTGTTAGCAGAGTGGAGATAAACACTCCTCACATGTCAAATCTGATGTCAAATAAAAACTGAGTCTATTTTTGTTTTTAATTAAAGGTAGACTAGGCGATATTACATAGGTGCAGAAAGTAAACAGCATTGTGGGTCAATTTCCACAACAACTAAGAGCGTTGAAGTGCTAGTCTCAACTTCTCCGCTGTTTTGGTGCCCTGGCTACCACGCTGTAAAAAAGCGTGTAGCGAACCCATGCACATGCACACATACTGTGTGTGACTGTGTGAGAGCGAAGTCTTGCATCTCGCTCAT…
CLocus_49878	1	245	46.19	16.12	72	32789	TGCAGTCTCCGTGTTCGTTTAATTCCCCAAGCATCTCAATCTGTGAGGAGGCAGGAGAGAGAAAGATTTGCCCTGTGTTACAGCCACAGCCCATGACATTTAGCACATCCTTGAGCACTTTATGTATCAGGCCTTAAACGACTCTGTCTCCTCAGTATTTCATCCTCTCCACAGGTGTAAGGTGTAATGGGATTTAGCTCTGACAGCCTGATCATGTTATTGACCTCCATGAAGTGAGTCATCACTACCAGAGTCAAGATTTTCAACAGTGCAGTTCACATACAGTACCAGTCAAAAGTTTGGACACATCTATTCATTCAAGGATTTTTACTATTTTCTACATTGTAGAATACTTGTGAAGACATCAACACTATGAAATAACACATATGTTATCATATA…
CLocus_46670	1	246	46.19	16.96	144	30832	TGCAGTACACGATTAAACAGAAATGATGCAAATTCACCAATAAAGTAAGCATTGGCTTTGTGTACAGTGTGAAGACAATGTAGTGCTTTGACAAATACCAACCAATCTCCTGCACCCGTAGGCAAGGCCTCTAGTTTAGGCACGGGTTTATGTACAGGAGGGGGAGAGAGAGAGAAACTTGCTTTGGTGTAGAACAGAGGTTGGCAACAGCATGATATTGTTTTGGACCCCCAACGAGTAGATGAAGGTAGATTATCTGCCATGGTCATATCAACCGAATCAGAGATGCAGCACACTGCATCACTTGTGCTAATAGCCAGCTCTGAAATATCCTTTTAGTATCCTCTATCCTCAAGAGCTTTGTTATAAACTCAGTTATGAAAACTTAGGACATTAAAG…
CLocus_8570	1	247	46.19	16.96	266	5802	TGCAGAAAACTGGATCAAATTAAGATCCTACGTCTGTAGCTGTAATAGTGGTTAGCACAGATCCAACATTTCCACCCATGACTGGACTGAGGCTGTAGGTTGCTTACTGTCACTGGCTGGACAAGTAGAGGATAGGAATAAACTGGTATTCAGCCTGCCGATAAGAGACTTAGAGAAAAAATAGTTTCAGAATTAATTAATCTACTTCAGTAGCCAACTTTTGCAGGGCAACCCTCCAACTCTCTGTTAGGGCAGAGCTGAGATGACAATGTTGTGAGGAGTCATGTGCCCAGGGAATCTGCTTCCCCTATTATTGGTTATAAAGGACTGGAGGGTTGGGAGTGGACTCAGTGGAGTCTTAACTAAAGAACACAAACCTTTGTTTAGACTGGCACCAAA…
CLocus_17980	1	248	46.19	16.96	59	12384	TGCAGGGCTTTGATCCAAGTTAGTGGAAATTCATGTTCTGTAATGGATCAAGCACCATAATTTTGTACTTATAATAGATTTTGACCAGATAACTCTCTATTATCAGACAGATCTTGGCAGCTTTAGCCGCCTTGATCGGAAGAGCGTCATTTCATTTGGCTCAGCCAAGTATTTATTTCCTGAATCTTGTGATCCAATCTAAAAGGGAAGGGAAGGTGAAATGTTATGGGCATGAAAGTCATTTTCTGCCTCTTTCCAGCTTCAGAGTCTTATTATCATATTGGAAAATATTCAAAAGGTTTAGGGAGGCGCATCTCTCGCTCTTGCTTGCTCTCTCATGCAGTAAAAACATTAAAGTTTGCTTTGTTATTGGGTTAAGTCTTTAACTTATCCTCCCAG…
CLocus_50005	1	249	46.19	16.96	198	32842	TGCAGCTGTGACTGTCTGTGTGTCCCAGATAGCTTCCTGACACGATCAGGTGTCTCCCTATTGATCAGGTGGATGTCTTGTCTGGGCATGTCTGTCTTTCTGGACTGGGTCCTTGTTTTTTCACTGTAATGTCTCGGACAATTGAACTTTCTTTAAATCTAAAATAAACAAAACACAAATGATCCTTCCACATTTACGATTTGTGTAGAAGACAACGATGATGTACATGTGAATATATGAAACTGTATAGTTTTGTATTAATTATTGTGTAATGCAATGTGCATTAGAAGTAATCTTGACCACAACACAGACACATAACAGTTCGATATGACATTAGTTCTGTTGAAAACATTCCCTAGCTATTAACCGTAAAAATGTAAGGGAAATTGAAGGTCACCT…
CLocus_59697	1	250	46.19	16.96	238	38644	TGCAGAGCGTCCGTAGATGGACAGACGAGGCTCAGCATGCTGGTACTTACTCTCCTCTAGGTCATGGGACACTTCCTGTCAAGGGAAAGACGTGGTAGAAAGATCAAATAAGTGAGAAGTTCTCTCATCTCCAAACAAACAGTCACCCAATTCTGGGTCTCTGTCACCTCCCATCCATCAGAGTAACACATGTGCAAATGTGTTACTGCACATGTTGTTTTTGCATAATAATGATAGCTTATGCAACATAACATGTGTTATCAATTTGAGAGAATCAGGATGTTTTCTGTATGAATTAACTATACCTTGATAATGCGTGCAAAGTACTCTCCATCTATGAGGTTGTCTGTTTTCAGGTAGATTTCTCTGAGTTCACTGGCCCCCACTGGGTTGTACTTG…
CLocus_44491	1	251	46.19	16.96	105	29471	TGCAGCCTGCAGATTGTGTTTAGATAATGGCCATCTCCAATCATAGATAATCTGGCTTCATCTTTTCTTCACAGACACAGCGGCGGACAAGGTCAGAGGGAAGAGATTCCTAGATGGAGAGGAGGAGATAAGGAAGGGGTGCTTCCCAAATGATTTAGTGCTGAGATTCGCTCAGCTACCCCCATCACCCGCCGTTAGCTCCCTCATCCTGCCGACCCCAACTCTCCGTCTCCCTCACTCCCTCCTTTTCTCTCTGGACCTCACTCTGTAGCCCTCTCTATCACTATCACTAGCTCTATCTCTCCCCTCTCTATCCACTTCCCCAGCCCAGTTTGGATTGAGGCAAATTGCTTGGGTTTAAAGTGGAGATATGAGACACTTTCTATTCAAGCACTGTCC…
CLocus_70594	1	252	46.19	17.25	147	44454	TGCAGCATAGGTGATTGATTAGATTTTGTATGGGGTGAATCAGTGAGAGATTTGGCAAGGTAAATGACGGATGATGTGGCAGCAAAACGTTGTTCTGTCACGACTTCCACCGAAGTCGGCTCCTCTCCTGACCACTGTTCGTGGCGGCAGTTCGGCGGTCGACGTCACCGGCCTTCTAGCCACCGCCGCTCCATTTTTCATTGTTCCATTTGTTTTGTCTTGTTCCCCGCACACCTGGTTTACATTCCCTAATCACATTGTATATATATATTCCTCTGTTCCCCCCATGTCCTTGTGTGGAATTGTTTTGTGTTACGTGTTTTATGTGACGCGCCAGGCTGGTTTTCCATGTTCCGTGTTTATATCACGAAGTATGTTTATTTGGTAAACTATAGCTTT…
CLocus_17380	1	253	46.19	17.81	25	11947	TGCAGCGTTGTTACAGGTAGCCTCCCTCTCTCTTCCATTCCGCTCCTCTTTTATCCCTGACAGCCCCTGCAATCTTCTGTTTTTATTAATCTCTCATTCAACTCCTGGGAGGAGTAGAAAAGTAGTGTTTCTCTAAAATCCAAGCAGTGGAGGTTCTACAACGTCTGTCTGGGATACTATACAGTGACTAGTGAAAGTATACACACCGCTTACGCAGTCGTCACAATTTGCTGCCTTAAAATTACATCTAAAAAGGGATTAAATGTGTTATTCCACCCACAAATCTACACAACCTACTCCGCATTTACAACGTGAATGAAGGTTAAAGAAAACTGTAAAAATCAATAAAAAATACAAAAACTAAGATGTCTTGATTGCATATGTCTTCACAGCCCAGAG…
CLocus_9601	1	254	46.19	17.81	172	6448	TGCAGAAACATCTTCCCTCCCATATCGTGGATATTAATTATTAAAGGCTCCAAAGCCCCCATATTTTTTCCCCCTATCTATTTAACACAGCCCAAGCCCTATCAGACATTCAGTTTGTTTGGAGTGATATTAAACACTTCCAGGTGCAAGGGTATAAAAACCAGGAAGTGTCACAGTAGGTGTTTTGCTCTGCTCCTCTTTGTCCTGGGTTGGGGAGCTGAAAGACTGAAAGACTGAAGTCAGCAACACAGTTTTCATCCAGTCCATACAGAGCTATATAACATACTCCATTAAACAACATAAAAAGACAGGCGTGACAGTCCAGCTATAAAACCAGTGACTAAACACAACAGATTCAGCCAGCGGGTCTTTTTTTAATCACACAGTAATCTAGTTTTT…
CLocus_83743	1	255	46.19	17.81	245	51283	TGCAGTGGACTGAACACATGCTAACCTACCTGTAAACTCATTGCATTCCCAAATCGATATTTCTCTCCCTTATGAAAATTGAGTTTGGAGGTCCAGCTGGCAGGCAGGATGTAGATGCGATTATCAGTAGCAGCAAGGCCATGTAGAGGCTGGGTATAACCCTGTTACATCCTCCCTGCCTCTCTGCCTCCCAGCCTGACCTCCCATCCCTGCCTCTCTAGCTCCCTGCCTGCCTCCCCTCTCTGGCCCGGGCCACCTTCTGCTTTATTGGACCACAATCAATATGGAGACCTGGTGATGAAGTACATCATTAGTCTGGGGCCTGGGCTACGGTCTTCATCTCACCATCCTACCGCTATGCCAAAGAGCATTTCTCCTGCTTTAACTTGACACTACTTA…
CLocus_70195	1	256	46.19	18.09	75	44231	TGCAGTAAATCTCATTAATAGCTGAGTTTATCGTCTGTGCCTTATAGCTAACCTGACTGAATGGCTGTTCTTTTAGAGTCATATTTCACCAACGCATACCTGTCTCCTGGGCTAATGAAAATGTGTGGCTCCACACTGGCTCTGTGTTCTAATTACCATTTGGGATCACATTGCACTGTTTAACAGACACTCATTAATTACCGTCCGCCACCATGACCCCAGCATGACAAACAGACTGATTGACAGACTGACAGACACTGCTAGGGCGTGCCATCAGAGTTAGGGTCAATACCATTTTTTATTCAGTCAATTCAGGAAGTACACTGACATTCTAATTCAGTTTACTTCCTGGAGCCCAACTCTGCATGCCACTGAGGGACTGAGGAGATTTACACCGCG…
CLocus_52756	1	257	46.19	18.09	149	34566	TGCAGCCCTTATCCGATCAGTATGTAGTATTTTCCAAGATACGGGCCTATGCCACTTTATATAGGAAAATTACCTGCTACACGGGCAGCTGTCTGATAGTAAGAGGTCTTAAGTTGAAAGCTTTCCCTCTTTGCCAAGGCTTTTCTTCCAAACTGTAGGCAATATCATACAATGATATATGAATTGGATATAGTTAAGGGGCTCTGAATTTGATGGCTGCTCGCTGACACATTGCAGTGTCTTTGTTCTTGTTGGACCAACATTGCAGTCTCAATAATTGTCTTCTCACTGGTGAGGAGGGAAGACGTGAGTCGTGCGGTGACTGAGTGCCAAATTCAAAGATGTCACAAATTGGAATGGGTGGGCGGCAGAGGAGGATGGAGGATGGAGGGAGGACGG…
CLocus_84667	1	258	46.19	18.65	77	51658	TGCAGGCAGGAGACAGCAGGAGGCTGGGGGAACTGGCATGCTTGGATCTCACAGTGTGGATCCAGTCAGCAGGGCACTGAAGCAGGACTCGACATCAGCCCTCTCCTCCTCTGTCATCTCTTTTTTTAAGAAGCTGTCTGGTTCAGACTTTTCCCCCTAAGTGCATCACAGCACAAATATGCTGAGTCAATGATGAACAGGGGAGCCTGCACACACACTGGAGCATCCACTCTCCTGTCAGAAAGAGACACTTAACAGGTAACTACACTACACGTCCATACCAGTAGTTTATCTATAGCGCAGCAATACAACATAAAGATATTGCCAGCCAGAGGTCAATCACTGGTATCATATAGCAAGCAAAACCCCTATTTTAGAACCAATGTGCCAAAGGCAAGC…
CLocus_113798	1	259	46.19	18.65	209	63848	TGCAGGTACAAACCTCTGGTGACAGGGGGAGAGAGAGAGAGAGAGGGAGAGAGAGTGGGGGAGAGAGAGAGAGGGGGAAAGAGACTGCAAGAAACTCACGAGGAGAGCCAGAAGTCATGTCCTTGTGAGACATAGGGTGTGTGTAATCAGAGCCGGGCGGCCCTATACGCTCACTACGCAACTTGCGTAGGGCCCCACAATTACGCAAGGGCACCGCCTCCCCCTCGTGTCAAAGCGGGTGTCAATGTTTACAACTTCGATGAGAGGATTAAGCGGAACTATCTTTCTGGTCATAAAAAATATATATATAAAAACACCATGAGAGTAAATTGCGGGAACAGCAATCAGGCAAACTTGTGTTCTCTCCTCTCCAAGTTTGATGTCAGCAAATAACAGTAA…
CLocus_13063	1	260	46.19	18.93	46	8895	TGCAGTAATCTAGGTTTTGTGAGGTGAAACCAAGGAAGACATACAGTATAAACATTTCACACCCAACTAATGACCAAGGGGACATGACAAAGGACTATTTCTGAAACTGAGATGCTACATTGCTCCTGTCGTGACAGGAACCTAAACAGTGGTGTTGTATGGAATGCAGAACGAAGTGTGATTCAGTATAACTACCAGGGTCCAGACAGCAGCCTTGTCAGCCACAAGCTCAGGGGATGTGTAAATGAAGAGAACAGTGAGTCTGTGTTTAGACATGGCATCCTGTGTTGTTAATAGAGAGGAGGAGGAACAGGCCTCAGCATTAGGCTACACTACAGGTGGAGTGACACCAGACTCCCCAATTACATCCTACACACTTCAGTCAAGTCTGTTGTTTAT…
CLocus_71660	1	261	46.19	18.93	215	45037	TGCAGTATCAGTGATTTATGATTTTAGAGCTATTGAGGGGAAGATTTAATACGAACATAATCAATGATTTTCATTCATCTTCAAATGTCAATGGTTACATTTGATCACGACAGGCATGGTCTTTTTTTAGCTTGTTTCAGATCCTAAGCTAGTTTGTTTCTAACACATTTACATGATATGTAAATTCTGGTTAGGTTTCCCACTACGGTTTGGAAGATTTCAATAACCTTGTAGTTGACCTGCCCTGTGGCAACAAACATGTCTATGGTACAGTGTACAGTATAGCAGTTTTAAGCCCTGTAATCTGCATACATTTACCATCTATTAACATTCACAGCGGAGTGTGTGTGTGTTAGTCACATGATCAGCCTTGCACATGATACTGAATGTTAACACCTT…
CLocus_51722	1	262	46.19	18.93	126	33904	TGCAGAGCCTATTGATTAAAAATGGAATGCTGTTGCCCTCATGTGCTCCAGAGGCAGTTCAATAGGCTTATACTAGGAAAGCTCCTATATATCTACGCCTATAGATCCAAGGCAGTGAGCAGATTAATCTACATTTCTTTCAATTAATGGTGCTATGCTCTCCTTAAGTATAAGAGTGGATTATTGTAAATGCAGCCATGGAAGCCTTTGGGGAATATGTGTTGTCTCTAAGAGGAGAGAGTGCAGACCTGTTTCCTACCAGGACCCTGACTGAAGTGTGTCTGTGTGTCTGTGCGTGTTTACGTGACTCTGTGATGCATTGTGGGGAATGTGTTTGGCTCCTTTGTCTGTCCATCTTTTGAATGGATCAAGTGCTGTGTCTGAGAGTGGGGAAAGTAC…
CLocus_64847	1	263	46.19	18.93	74	41500	TGCAGGACTGCAGAATACTCAATGCTAAAGAGAGCTAGTTCATTCCTCTCTGCATACCTCTCTCCCTCCTTTCCCTCTCTCCTTTCCTTTCCCTGTCCATTTTTATCACCCTTTCTTTTCCCATCACTGTCTCCATTCCTCTTTTTTT
CLocus_12129	1	264	46.19	19.21	97	8266	TGCAGGGTTACTCAACTAAATTCTTACAGGGGCCAGATTTGAACAGGGTTATTTATATTATAATCTTATAAAGCACTTTCATTAAAATTAAATGTCACTAGAAGTTCATTTTGAGTGCTTTAAGACAAGCCCAATTCAGTGCATCAAATGGTTTTACATAATGGAACACATTTGAACTTAACACACCTGCATCACATTAATTAATTTCTACATGCATCGCTTCATCTTGTTTTTATTTACACATAGGAAACCTTTTATGCATGGTATATCTCAGTTGATCAGCATCAAATTCTGTCCCATTTTCATTCATAGTTCTCTGTCTACTTTTGTTTTTACACAGAAACATATCTCATTTGACTAGCTTTTGCGGAGCAGTCTCTCTCCCACCTCATCAGTAGA…
CLocus_97814	1	265	46.19	19.21	110	57491	TGCAGCTCTATTCGGCTGCTTCTTAGAACAATGGGTTCGAATTTCAGGCTGGTCACATGACCCCGAAGCTGGCACAGCACTCCAGCCAGCATCCAGCAGCTTTTTACACGGGAGGAACGTAGCGGTAAGCTACACTACAGCCTGACTGTGCCACCATCTTACACCCAACACTCTCCCTCCCTCACACAGGACTTTAACAGGATAACATGCACTCACTTCCCAAAGACAAAATCAGACTCAAAACAGCAGCAAACCACAAAATATTAGCTTGAAAAGTGAAATGGGGACCCTTGCCTTTCTAACATTCAATTTCCTGTCTTTGTGAGAACAAATGAAAACACTCCATCAAAAATGGGGAAACAAATGGGGGGAAAATACACACATTTCCTAGATGCAAAA…
CLocus_70115	1	266	46.19	19.21	198	44182	TGCAGAGGGTTGAGAAAGCCATGAGAAAACATGTGATCAATCATGGAAATAAAAGTGTGCAAAAATAACTAAACCAAATAAAATACTATTGCGATAACTGTCAAAAAGATACGATATGTGGTCAAAAATAATATCCGGATATGTTACCGTAGCATTCTTTTTCCTGCCCATCACTATTAGTACCCTATATAATTATTAGTCTTTTTTTTATTATTTTTTTTTATTAGAATTAAAGTTCACTGACCATTGTACTATGTTGCCAATTGCCAATACTTTTTTTTGTCTGAGTCTCAACTTACTGTTGAGAGTTAGAATAGTAAAATACACAAGGTGCAATTTCTACATGTGGTTGTGCATCAGCAGTTTTTCTCTTGTCATGTCACTGTGATGATCGTCCCA…
CLocus_39788	1	267	46.19	19.5	142	26543	TGCAGTGACTGGCAGGCCTTGCCACAGGTGGATGTTCCTAAAAGTAGATCCCAGCCAAGTGCCACTGTGAGTTAGGTTCTAGAATATTCATTATACAGCCCAGCACATGTTTTCATGAGAGGGAGAGGAAATGTATTGTGCTTGGACAGTTATTTGAACATTTGGTGTATCATCTTGGGTTGTATTTTCTTTGATCCAATAGGTACAGCTCCTAAAGTCATGTATAGTCTCTCAACAATGGTCTCAACAATACATTGTCAGCACACATGAACTCATTCAAAAACATATACATTTCACTGCATAGGAATGCATACTGTGCAAATACTATGGTTGTGATCATACTGTTATCAGACTGAGGGAAAACGGCCCTTGCATAAATGGCCTTTCAAAAGCTAGACT…
CLocus_35501	1	268	46.19	20.06	189	23867	TGCAGGTCAGCCAGAACCCTTCTTTTGTTTGGGTAACAAGGAATGTCACATGACATAACAGCATGTTATTCAATGTTAGCATGTCATTCAATGTTTTTCAACTAAAGGTCTACCAATGTGATTTTGTTAAATTGACTGTCTTGGTTGAGCGAGAAGGGAAGTATGTTACTATAGTGGATTGTTTTCTTCGCAGGTCTACATGAGCAGCTGAATATAGACCCAAATCAATCACAGTCAATAAGCTGAGAATTGTGTAAGAACAGCAAACACTATGAATGAAAAGAGGATGTCGAGAAACATAAGGTCCTGTTTCTGTTCTCTACAGCTGAAAGCCTTTGCCCTGTCGCCCAGTGGAGAGAGACTGGAGAATCCCTCCACCATTGAGATCGTAGTGCTGGA…
CLocus_46399	1	269	46.19	21.19	23	30651	TGCAGTCTCTAAACATGAGTCACTGCTGCCACTGTGTAGTCTAACAGAGAGCAGAGAAGTAAGCGTTTGGAAACAGTTCCTAATGAGCCCCATGCAAGTACAAAATGCATTACAGTGGATTACTTTTAAACCCAACATGTATAGTTTTTGCTGTCCTTTCCTGACTCATCAGAAACATTTCAATCAGTCCACTGAAATCAGTAAACACAACAGTTTACATGATCACTGATTTTCTTGACAGCTATTGATGTGTGAGGAATTTCAGTATGCATTGAACCTTGAACCTGGTACAAATGTACACTACCCTTCAAATTTTGGGGTCACTTAGAAATGTCCTTGTTTTTGAAAGAAAAGCAATTATTTAATTTTTTTGTCCATTTTTAAAATAACATCAAATTG…
CLocus_17053	1	270	46.19	21.19	250	11713	TGCAGAGAGAAAACAGCTGCCCCACATAATACAACTAATTAAATCCTCATGTTCAATCACCAAATGGATATTTTATGGCCATGAAAAATATCATATCAAACTGTCAACTGGCACAGTATATGGGATAAGTAAATGTCTTGTACAACCAAAACGAGGGGAAGTTGTATTACTAGATTCCCCTCCCTTCTACACACAGACATAGTCAGGTGAGCCTCCTCTGGGCAGAGTGGAGGTGAGAGCCATACCGTGATCTATTCTCCCTCCCTGATTCTTCCAGTCAGTTGGTGTAAAGGAGAGGAGCCATAAATAACTGTCATATTTCTCCTTCTGCTCCCTCTCTGGTCCAGCTGTCTGGGGCTGCTGTGCTGAGCTAGGGCTGGGGGGCTGGGCGGCTAGTCC…
CLocus_18215	1	271	46.19	21.47	81	12538	TGCAGGATATGTGGTAAACCACTAGTTCTACATTGAAATGCTATAAACATTCTGTGTGCCCGAAGAAGAAACAAAGACTCCGGGAGGACAGCCCGCATTAGATTTATTGACCTACTCTACTTTTGTCTTGGCATTGATTTTCTCTTTTTAGTGGAAAGACTGATAGATAAATATTGAGTATTTTCTGAGCTGGCTGTCAACTGTGGGCATTCTGTGGCTGATGGCAGATGGAAGGGGATGGAGGGACCTCTTTGTGTTGTTGTGATAGAGTTGGCCGTGAGAGGAGAGGATGGAGGTATAGGTAGGATGGAAGGAACAGGCCATTAGTCTTTTTAGACTCGCTGATAAGGCAGGGAAATGCCTACAGTACATTGATAGGAATACCAGCATTACCGCTAC…
CLocus_11241	1	272	46.19	21.47	166	7646	TGCAGGGCGTTTCACTTCTCCCCCAGTTTGTTGGAGTGCATATGGCAGTATGCCAACAGTGTGTGTTAGATGGTGTTTGAATATATGTTCCAGTACACAGTTCCTCTCATTTCTACCCTCGAATCTAATCTGTCCATTGGAGCCTGGTCGGTCGGCACACATGTGGGCTAACCATGTGACCTGCCACTTGTGTTCTGGTTTTAGAGGGGAGAGCGAGCTACACTGTGTCACAACAATGCCCCCTGTATCACTACAGCCGGTAAACAAGCCCCCCCACACACACACAGACACACAAACACTGAGACAATGCCACAGCCATTCTCACACATACTCCAAGACACTTGTTCCAAACGGGAATTCTACCTGTACACACAAGTGACTGAAGTCTTGGTCATTTTG…
CLocus_13723	1	273	46.19	21.47	175	9394	TGCAGCACACATGCTACGTCTATGTTCCACCTATGTTACCTGATTGATATGACAGTTTTGTAGGTTTAAACTGCATTATCTTGCCACAATATATCCATCCACTGGGGCGCGCCTGCGTAATGTGGCAGCAGCAAGTGTGGTTCTGAACAATATAATTGCATCCTCAAACAACAACTTAAAACAGCTGTTCAAATAGGCCACAGATGCTAGGCATCCGAAACCTCAAGGCGCTCATCTCATACATTTCAGACATGTTTTTATGTTGTCTGAAAGTTAAGAAATGGTCTCATACTGCATATTCCTACACTACCCCTTATGACAATGCGTATTTCAGATGTTTTGGCATTTCCCATTCCATATAGGAGCTTGAAGCCATCAAGGCACGGGTGCAAGAGATGG…
CLocus_19840	1	274	46.19	21.47	22	13663	TGCAGGCTCCAGTCAACTGGCGTGCCTCCTGCGGGTCGTTTCTAATGCGGAGCTAGATGAGCCGGGATGGAGCCCTGCCCTCACCACAAAGCCTGTGTCACATTTCAGACTAGACCGTGAAAGCTGCTTCAACCGCCTCGACTGGTGCTGACTCACTCGTACTGACACACACACAAACAAGTAGCGGTGCGTCCGTGATATATAGGCCTTAAGGCCGAGACAATAAGAAGACACAGTGGCAGAATAAATTGAAAGCAAATTGAATGTAACAAACAGTTACGTGACCTACAGCAAGTTAATGTTTCTGACATTTTCGGACTACTAAACAACTATTGATTTAGAACCACGGAGAGTTATCGCAAGTCGCAGAGAAAAGAGGAACTGCCTCCACTATTCTAG…
CLocus_1539	1	275	46.19	21.75	177	1379	TGCAGACAACAGGCCTGGATACCTGTGGCTAGGCCTGATGCCTTCTGTAACCATGAACATTTACCGATGTTGTCAGAACACCTGAGAACATATTTTACAAAATAAATTACCATACCATCTGTACTGTCAAGTTGCTTCCTACGAACAGCTTTCCTCCTTTTATTCTCTTCCCGCCCGAGCCACAGACTAATGACGAGTTGGGCATCAGCATCAGCCCTGCTCTTTATTGTTCATTTTTCAAAGCCTTCACTGTAAGATAGTGTTCTCTGTTGGGACGTTGTAGCACAGTATGCTGTGTCATTCATGTGTCTGGCAATAATGTTGTCTTTAACCTTACCAATAAGTACCTCTGGTTTTATAGTGGAACCAGGATGATTACAGGGGGATAAGCTAGCTGTA…
CLocus_12184	1	276	46.19	21.75	149	8306	TGCAGGCATAACACTGTTTCGATGGATGAGTCACTCAACAATGCTTAAAACATTGAATATTGCACGTTTTTGTGAGTCTTGTTTTTTGATGCTTTTTGTATTAACCCTTTACCGTTGTACCCGTATACGGTTTGAAAATGGCCGATTGATAAGCGCCTAAATTGGAATGCAGTGGCTGTACAGTAACATGCTATAAATTACTTCAGAGCTCAGGCTCTGAGCTTCATAGAGCTGAATGGGTTTTGACTGACAGCTGTTCGGAACTTGAGTACTGCATGCGTCAAGAAGTTGCCCCCATTCCTCCGCTAATTGGGACATTTTTGAAAATGCTTTGCTTGTCTATTGTGAAGAACACACCCGCAGAACACACACCTGAATACACTCATGACTCCTTTCTAT…
CLocus_5942	1	277	46.19	21.75	42	4132	TGCAGGGCCATGCTGGGCCGTGAAAATCATGGTTCCTATTTAATTTCCATTTGCCAATGGCCCGCTTGATTCCTGGAACGAAGCAGGATATTCAGCCTCGTTTGATATCTGTTACTGACCTCGAACCAAGTAGGCCAGTGGGTGGGCCGTTGGAAAATTGGCCGTACTCAGTGATTGGTCTCAGACAATGATTTCACAGTGTCTCAAATCCAGAAGCAACTGGATTCTTCCACCACGAACAAAAAGGTCTTCAAACAAAGATTGGATACGTTAGACAAGATAGGAATCCATCGGTTAGTAAAAAAAATTAAAAATAAACTCAAACAAGAATATAAAAAGATAAAAGACCAAAACAACAAAATGGATCAGACCACAAAACACACCGGTGATTCAACACCA…
CLocus_54563	1	278	46.19	21.75	89	35663	TGCAGAAGCAAAAAATAAAATCTATTATCATTATTCTTGTACGCCTTCCGCTAATAAACAAAATGCTTTATTAGAGCAGAATGGAGAATGTCAACCCTGGCAAGGAATCTCACCCAAGATTTATCCATCTGCCTACATCCTTCATCGTCCTGCTTGTGCCCAGACCCTGCTAATGTTTCTATTCATTTGGCCATTTGTTGTACTTAATGTGGCTTGATGTGCCAGATGCATGGTGGAGATCCTGGCACAATTAAGTGCAGGGAATTGTAACACACAAACAATGAAAGCAATTACCAACACAAAAACACAAAGCCATTCAACACAAACCCAGTGCTACTGGATAACTCTCTCTCTCTATATATATATACAT
CLocus_83868	1	279	46.19	21.75	197	51338	TGCAGAGTAGCAAGCAACGTGTCTGGCCAGAGACCTTACTGCTCACTGGTCTGACACAAGGAGAAATACATCACTGTATTGGATGTGCTGTTTCTACAGAAAGCCCTCAGAGAGTCTTTTCTGTCTGAACTATAACTATAGTACAGTAATTATAAAGCCAGACACCCCCCCTCTTCCCTCCTTCTCCTCTCTCCCTGCCTGGCAGTGACTGTCACCTATCATGATGGAGTTGTCATGTTCCAGCATGCATCACACTGAGTCACAGCCTATCGATCCACCTCCTCACACACCTGCCTCACAACACGAGTGAGGCAGTCCAGGTTCCCTGATTGAGATGGTTCCTCGCTGACTGACTGAGACTCATATGTCAGCGACATGTGACTCTTACAGCTGATGGAG…
CLocus_21915	1	280	46.19	23.46	152	15120	TGCAGTTCTGTTTGGGATTAAGACAGCTGGCCTGGCTCCGGGTGAGTCTTGTAAGTCACTGTTAAGCACGTGTATTGCCCTGTTTGCGTGTGGTAGAGTTCATGTCTTTGAGTTGATGCTGTGTCTTTGGGCTGGGGGAGTTGATGGAAACGTTGGTGTGTGGATGTGTAGTGGGGCATGGCCCGGGGAAGACACGAGAATGGTAAAACAGACTGCTGTTTCACACTGTATCTGTCACAGAAACTCCAGCCTAGTTAAACATTGACTCATTACGCTTGTTTCTGTGTGTGTGTGTGTGTGTGATCTGAAAAATCCATCTGGGCTGATTTTTGTTTGTTCGGTGTCTGTTTTTCGGGCAACCGTGCGTGTCCATTTATGCACATGTGTGTGTAAACGAGC…
CLocus_20453	1	281	46.19	23.46	208	14084	TGCAGGGCTTTTTTTCCACAACAAGTGAACAGATATAACTACCCCCTGAATCGCCCCACCCCCAGTCCACAGCAGCATAGTGGCAGGGTTTTGGTATCAAGTGCAACACAGCATTCATACGCAGTGTGTCAGGGAGCTACAGGAGCAAGATATATTTATAACACTCGCTGTGGAAAATATTCCACATATTCGAATCCGTGCAAGGCTGTGCTGAGGTCGTTCATAAAAATATCCCACCAGGCCAGATAGCATCCTCTGGATAGACTAAAAATAGCCCCACTTTGTCTTCACAGGGGCTATAAGTGGCAACTGGGATTGTATTACTATGATACTAGCAATGGAGTAGTGGCATGCTTATTATAAACAGGTTATCCAGTATTTATAGGCCTAAACGTTTGT…
CLocus_9401	1	282	46.19	24.03	77	6290	TGCAGACAGTTTACAGTCTGAGAACTGTTGACACACAGCAATGTATAGGGCTACAGGTACCAATAAACCTTCAATTCAAATAGGAGGTCATTAATGTCACAGTGATTTAAATATGGGTCATATTTTCCTCTTGATGGCCATATAACAGCTGATACACCATGATCATATGATGCATATTCTGTACAAACAGTGGACTAGTTTCAGAATTAGTAAGCATCCAATTTCAGTTTTATACATGTACATCAGCACCCAAGAGCATTGCTAGCACTTAAGGGCCAACACAGATGATAGACATAGGAATGAAATGAAAAAGAGAAAAATCTCACAATGTGTTGACCTCCTTTTCCCACCAACAGAGCCTTTCCTTTAATTTTGTGCAACAGAGTAGAAATGAGTGCA…
CLocus_113226	1	283	46.19	24.03	19	63676	TGCAGGAAATCATTTCACATGTGGCTTCACTTAAGACACTCAGAGCTCTATTTTTGTCTGCCTTTAAGCCAGCGCAACTGTCAAACGCACGCCAGTTTGCAATTTCGACCTGTTAAATCCGGCGCTCTTCTATTTACAAACCCTAGCGCTCATATACCTGTCTTATACAAGCTCGCTTGGGCTGAGGTGGGATGGGTGGCAATATCTGAGGTGTATCCTTAAAAATGTGTGCCAAAGTGCCAATTTCAGTATGCATTGGTGGGGATATTTAATACCGAAAGCTGGTAACGCAGTTGGTTATGGCATGATTTTGACAGAAGTGCAGCCTATCCAGCCGTGATGTACAAGGCCCATATGCATACGGCATCAGAGAGATGTGTTTTTTGTACCTGTAAACCT…
CLocus_13699	1	284	46.19	24.03	31	9358	TGCAGGTTAGAGGCCTAAATCGACTGACGTGTGCAGTCACACTACTGACGTTAAATTCTCAAACAAATGTCACTTACAGTATGTGGTAGTATCTGAACTACCTTTGAGATGATTGAATGAATCCATGCTATTCCCCTGTCTTAAAGACATGTGTCATGGACTTTGTTTTCTTCCAGTAGCCCACAAACACCCAGAGATGCTACAGGTTGTGTTCTTGTGGTAAACCTAATGTAATCTCATTAATATTAACTAGAGTACTGAGGACTTATTGCTACACAAATTATGAAAACAAATGTTATGCCCCACAGGTTATGAAACTACTAAGCAATTAGGAGTTATGGTCATGGTCTTTATGATGTGAAAGCTAGCGTTTCAAGAGCAAAGATGTTGGGTTATATC…
CLocus_4097	1	285	46.19	24.03	99	2958	TGCAGTTGAAGGACAAGTCAGTGTTAACATTTACTGGTGGAAATAGTGAAGTGACATTAAGCATACTGCATAGCCATACCACTGTTAGATGCATCAGTGTACCAATGTGTCTCTAGAATGAGTTCTCTCTCCTTTTAATTGTATTCATAGTGACCTCAAATGATTCATTCATAAAGTGTCCCTGGCAGCTAGACAGCACAAGTACTAACTGATCGCTTAGATAGTTTTGGAATGTGCTATAAATTGACATTGGTGCACTAGGCAGTAGACCAGAACCGGAGAACTGGAGTGCATGTCCCTTGATTAGATAAGTATGCAAAGTGTTTGTCTGTCTTTGGCATGTGCTGTGTTATTGCACCCTATTAGAGTGGGACCACTTGTCTTGGGGAGGGAATGAAC…
CLocus_57234	1	286	46.19	24.03	67	37265	TGCAGTTGAAGGTGGACGGGATGTTGATAATGATGATGAGTCTCAACACGAGGTGAATCTGAAGCAGCACAAAGTGAATTATTCAGTCTTGATTGGCAGTGCTCTCTCTCTCTCAACTCATGTCCACCTATTGATTAAGCAGAGGTTTTCAACTTGGCCCCGTTTCCACCTCATGTTATAATTTCCTCCAAAATATGAGTCTGTCAATAAGTAATTACTTGCTTGGCAATTTGCTATGCAAAATGTTCATCTGAGAGTGGAAGATCCATATCAATTGTTCATTTACATATGCAAATGAATCTAGCAGGAGGAAAACCAACATCAGTGCCATCAACATTTGAATGCGAGTGCTAAAAATCCAAGGTGCTACAACAGAGAAAAACAAAGGTCTACAGAGTG…
CLocus_32431	1	287	46.19	24.03	112	22008	TGCAGTGGCTTTTCTCTGCGAGAGCCAGTATCAGTGACCGAAAGAATGATGGGATCTGAGGTGCACACACTTTCTGGTTTAATTGAAAAGATACCCGTAAATATTTTAAATGAACATTTGCAGCACAGTTTCTTCAAACCTCTTTGTTCTTTGTGCCCTTTCGTCAATGTTCACTTTGCACTTGAGTACAAAGAAGTTTGCTGAACTTGAAGATATTTAAACATTTAATTTCTGTAATACATGTTCTGGACAATCAAATTCTAAGACTGTCCATTTACTTGGGCAGCATTTCCCCAAGAAATACTCTAAATTGGATATGTATCGAAACTTTACCACCTTGGAAGCTGACCAGGGAATAATTAATACTGGAACATCATAGTTGTCCATAATTTAATAATA…
CLocus_62223	1	288	46.19	24.03	34	40153	TGCAGATGCAGGAATGCCCACATACAGCAATGCTCCAAATTGCAGGCGGCAATTGCACCCTTCTCGACTCCGCTATCAATGACTCATAGCGGTTAGGAAAAAAATACAGAGTTGACATGACCACCATTGTCATCGATTTCTTGTTCTGGTGGATGTAGCTACAGATATGAGCAAATAATCCTCATAATGTACATGGTTTTTTTTCTCCGTAAAAGCACACAGATTTGTATGAAACGATGTGTATGAAACGATCAAAACAATGAAACAATGTGTATGAAATGATCAAAAACGCTGAATTTGGTCATTTGTGGAAATGTACCGTATTGCCTTGCCTTTTGAATTTTGTATATTGTTAGTAATCAAGGAAGCGTCATGCAAAATATATTGGTACACTCCACT…
CLocus_7656	1	289	46.19	24.03	220	5171	TGCAGTCACATGCACTTGCTATGTTTTAATGACTCCAGGAGAGAAGGCGGCAAAAAGTGGGATGGAACAGGGTGTTGTGTGTATTCAGCCGGAACTTGTGTACTCTCAAAGTCCTGTAATATTCATCCATTTGTGTTTTGTACATGGGCAGACCTTTCCCCCAAGACGCATGCTCGCTCCTCAATTATGTACATCTGAAATTGAGCATGAATATGAAACAACCATCAAGGCTGGAGCTGGAGAGAAATGGAGAGAGAAGAGGGCGCACTCAGACATTCAACAGGATTCTCATGTGACTTGTAGAAGGGAGATTTTATACAACAGTTTCAAATGCTACAAGGCTTTTCTCCCATATGGTTCTTCTGGCACTTATCTTCACTCTGTCAAAGCAAGGATAAG…
CLocus_44449	1	290	46.19	24.03	97	29453	TGCAGTCACAACCTCAGTCAACACTACACCCTGCACTATGAGCTGTGAGAGCATATGCATCCAAGTCTACTTTGCCAATATGTGTTATGAGAGATTTTTCTTCAGTGTTGAACAAGAATCCCAAAAATGCAAGCTAACTTGAGACTGCATTAGGGAAGGTGAACAAAGCTTGAATTCAGTGTTGGGCTTCTGACGTTGCATTGAAGAAAGCCTGTCTGAAAACTCTAAGGACTGCAATGATGGTGCCAGAATCATGCTGGGAAGTAGGCAGTACTTTTAGAATAGAGAAAGGTGCAGAGTAAACAGCATCATTAAGATAAGAGGCTGGTGACGCAGATGGGGAGGCAGAGAGGCTAGTGTTGATGGCTACATTGCAGATCAGTGGAGATGGAGACACAG…
CLocus_16052	1	291	46.19	24.03	35	11096	TGCAGAGGTAAGTACAAGGCATCTGATGCAGGATCATTTACTGCAAGGTTTAATGAGGTGTGTGGATAACCCTGTGAATCCAAGGTCATACTGTAATCATGGTCCCCTATTTCCATAGTAGTGCCTGAAATAAATATCTAAAATAATTATTAATTTGCTGAATAATGGTTTTTGGTGTGTCTTTAGCTAGTTTTATAGTTAGTTATTTACCTATCATCTGAGAGGCTGTGTTTAAGTTACATACAGTGCATTCGGAAAGTATTCAGACCCCTTGACTTTTTACACATTTTGTTACGTTACAGCCTTATTCTAAAATAGATTACATTGTTTTGTTTCCTCATCAATCTACACAAAATAACCCATAATGACAAAGTAAAAACAGGTTTGTATACATACATA…
CLocus_68546	1	292	46.19	24.03	153	43440	TGCAGTAACCATGGAACTGTGTACTGACACAGCCAAGTATTGCGCCATGAGTCGGGTTCAAACTGTTACGCTTGGTCTGCGATTTGCTCCATAACGATTTAATTAGCCTACTTGTCTTTTTTTAATATTAACAATGGTTACTAATGATCCTCCGCAACAACCACATGGCTGTGACATTGTTTACAGAGGAAGCAAATGAAGGTAAACAAAACAATGTAATTAAATGGCATGATCATGTAGGCTATACCAACTGAAGGGAACTAACAGTAAATTGGAAGTTGAATATGTGTTGTGATTAGGCCCACTGACGGTTGGTACGGATAGTGGCTAATATTTTACATGATAGAAACAGGAAACAGAGAAAGTCGGGGTTGCCTATAATTAAGACATTCGAGAGTG…
CLocus_43011	1	293	46.19	24.31	164	28636	TGCAGTGATGTTTGTGTTAAATCTCAAGACATTTATAGCTGGAGGTTGTTTGTTACGATGTCTCCTCCAGCACTCAAAATATTTACAGGCCTATGTAAAAATATATTTAGCATCTGTATGAAGTTAACAGGGAAGGGTTGGTGATGAATGAATGTATGTCCTGGCCCCACTATTTCACAATGTTAGTATTCTCCTCCTCACCTAACAATCAGGAACGCTTTGGAATTTTAAACATCCTCGGACCAAGGGCTTCATGACAGACGCCTGTCGTTCTGTCTTTCACTCACACTTCTACTCCCTTGTTGACTTTCCTTTCAGTCTCTCTCTCTCTCAAGTGTGGTTTTAGATTCAAATGCACTGTAAAGAGCTGAAAATAGTCTTTAAAACCTTTTACTATTG…
CLocus_13882	1	294	46.19	24.31	120	9516	TGCAGAATACTATTTTGCACTGTACAAAAACGCAGCTCGTTGATCCATTCTTCGTTGGTGGCAAAACGGTATCAGTATGTTATACATATCAAGATTCAATGTGGAGTTTATGTGCTTTAATTCTGTATGAGATCGTGCTCTAAGGACAGATTGATTTCAACTCTAAAATATGATGTTTTATTACCATCTCACACAGTATCTACAAATATAAAAAGTATTGAATTGGCACATTTTACATAATGTGTTGTTTTGTGGCCAACAAAATAAGGAAAACTAATAACTGAAGTCTATAGTTTTACTACCTGTATGTACAGCATGCGCAAAAAATAACGTGTTTGGCCTCAGCAGGTAGGCCACTTTAATCCACCTTCTCTGGGTTATTTGTAAGATGAATGAAAC…
CLocus_31908	1	295	46.19	24.31	26	21644	TGCAGCTGGCCTTGTGAAAAAAAACCACCCACAAACATTCATCGCATGAAGCTGAATCCTGGGGAATAGGGAGTATCACTTAGGTCTTATTATGTGGGGGATTGAGCCCCAGCTCAAATGTTCACAGAGCCCATACAATGTGAAGGGTTCGGGTTATCATGTAAGACATCCGTTAAGTAAAGCTGAGCGAGGGAGGCCTTGTTGGGCCTGGGAGGTTGTCATCCTTTAGATGGGTTTGAAATACACAGGGGGAGAGCGAGATGGGGAGTTTAACTGTAAGCGCAAAAACTTTTCTCCCGATGTTTTATTTATCTTTTACCCAGAACAGAGGAGAAAAAGGGGTACTAGGCAAAAATATGTGTAAGGGGTCAAATAGTTCCCTCGAAGAACAACTGCCGT…
CLocus_103228	1	296	46.19	24.31	109	59698	TGCAGGCGTGTATGTATGTGTATATATATATAATCCTTTGCCTTCCATTTTTCAAGTGTTAGAACTGGTGTCTCTCTCTTTTCACAGCCTATACATTGTGTGCTGTATTATATTTCAATACAAACTCTCCAAACTCCTCAAAATATGTACTGTACAACAGCCTATGGAATGTTTTTCTCTTGTTCCAGACAGTGTATCGTCCTACTGTGCACACTGTCCCATTCCTTGTAATTATGTAAATTACACATTAATGAGGTGTAATTGTGAATTCATAAAACAGCAGGGATAATCTGTAAAAAGACGCCACGTCTTAATAAAGGGGAATGGGAGCTTCATCATTGAGGGGCGGCAGTGCTAATTGTTTACCCACTACTGTTCCTTAAACACAACACATTAATT…
CLocus_49572	1	297	46.19	24.59	111	32551	TGCAGCCTGCACACCATGTATTCTCAAAAGCAACACCTTTAAATGCAACACCTTATGCTAAAAATGGTAACATGAAATAAAGGGGGATGATAGAAGGAAAGAGAGTGAGACGGGAAAAGGAGAGAAAAAGAGAAAAAAATGGAAGGCAGGTGTTGTTGGTGGGGTTGGCATTTGTCCCAATGGATGGAATACCCTGGTGTGAGTGTACATGTGTCTGTGTGTGTAAATATATATAGATATTTATAAGTGTAGCGAGCCCTACAGCACCAGGCCCTCATAAGCAGGCCCCTCGGCCTCCGGCGACTCTCTCTGCAGACGCAGGTGCTCCAGTGTGTTGTGGAAGTGTTTGTTAATCTGCTCCGTCTCCTCGCTGGCCTCCAGGTTTGGCAGGTCCTCTCG…
CLocus_107267	1	298	46.19	24.59	98	61293	TGCAGTGTATCTGAAAAGTTGACAGTATTATTAGACTATATTATAATGACTGTCTAAAACATGTATCTTTAGTTTGAGAATTGTATTTCCGTTATTTGAAGAATTTAATAAATTAATTGAGATGCAAAATTACCTTTATTTGAGGCACTCTTTTACTTCACATTATTTGCTTGTGCATTTTCCAGCCAAAGCCATTCTGTTTTTGACTTAGCCCTGAATCCCCATACCGGTAACTGGATTTCCCCATACCGGTTACTGGACTATTTACATTGACCCCCCCTTTACAAATTACCTCGACTAACCTGTACCACCCGCACATTGATTCGGTACCGGTTCCCCCTGTATATAGCCTCGTTATTGTTATGTAAATGTATTGTGTTACCTTTTGATTGATTCGAT…
CLocus_107857	1	299	46.19	24.59	75	61534	TGCAGGCCAAAGTTGGTTGGTAACACTGTTTCACTAAAGTAAAGTACATTTTTTATCCTGAAGATAGTCCACCTTCTAACATGCATACAATCTTTATGAACAGTTGAGAAGAAAATGTGGGAGAAGAAAATGTGCACAAAATAATGTTTGTTTTATTCACCAATGTCCTAAGGCATGTTTGCCAGGCTCACATATCCAATCTGGTGATGGCTGGACTCCAAGGCAACTCTAACCAACCAAATGCACCATGTAACCTTAACACGATGACCCCCTGTGACCTTGAACATTGGGAGTCACATAGGTCAATAAGCAATTAGTATCGCTTTGGCCAGGCACTTAGAATTGTGACTGTGAACATTAGATCCGTTGTAATTATCCCATTCATAATCCTCCATCAAT…
CLocus_56413	1	300	46.19	24.59	26	36725	TGCAGGCACCTTACTGCAGAGGAGAGACACACTTAAAAACCTGTTTTTCTAGTTTTGGGTATGGAGGCATATAATTATATGCCAATTTGTTGTCAGCTGCACAGTACCTACACCATGCAAGTTTTATGCGTATGTTGAGAAGTGACAAATGCCTCTCACTAATGGGTGTAGAAAGGAATCACATTTCAGCAGTAGGTTTCTAGATGGGTGTTAGGTGAACAGACCTTGGCTTCCTCCACAGCTCGTGGGGGGATGAAGATGCGTGGGAAGGCGTACATGGCTCCCTGCACAGGGTTACATTTGATCCCAGGCACCGTGTTGAGGATCTGCTCAGTCATCTGGGCCTTCTCAGCCAGAGCTCCAAGCACAGCACTCTTCTCCTGGAAGACAACACGCATA…
CLocus_43036	1	301	46.19	24.59	58	28656	TGCAGTTTATACTTTTATGGTACTGGCTGTACTATGTGGTGTGTTAATGCCTGTTGAAGGTAAAACAACCACTCAATCTACAGCACATGGAGTGAAATGAACGTATTGCAGAGAGGATGTGAGATGTACAGAGGGGTAAGCCCTCGGGAATAAAATAGAGCTTGCTGGCGCAGTAAGCATTTGAACAGGGATGATATTAATGCATAGAGAAGGCTAGCGCGGGCGAGGAGAGGTCAGAGCAGAGGCGCCGTGTCAGTCTCTTTATGCAAATGGAGGGCCTGCCGAGTTGGATAGAGGGAGGGGAGATTGGAGGGGCTGTTTACATGCGTCTGTTTCTATGTGCGTGCCCTCCTGTGGTGCTAGGAAACCCCTGAAAGCTGAGATAAAGAGGGTGTGGAA…
CLocus_61758	1	302	46.19	24.59	126	39875	TGCAGAGAAACATTTAACAGAGATGTCTAAATATATCTACACAAAGTCTTTATCTGTTCCCTGGCTGATAATAAGTCCAGCGCTGCAACCTGGTCTCAGAGCATTTTGTATTATTTTGTAAATCCTAGAAAATCCATTTCCAAATCCAATCCATATGTTACGTTTCGTATGGTATGTATTCATTTGTGGATGTCCATGACCGATTACGTATGATATGTTACGAATAACAATTTGTATTATATGTTATGAATTTTCTAAATGTACAATATGTTGCGAATTTGCAAAACATACAATATGTTACGAATTTGCAAAAGGCATTATATGTCACGAATTCTAGCTAGATGGCTATGTGGCTAACGTTAGCTAGCTGGTGTTAGGGTTAGGTGTTAGGATTAAGTT…
CLocus_72132	1	303	46.19	24.59	21	45367	TGCAGGGGAAAATACAAATTCGGTTAATAGTATATAACAAAATCACAATAATATACTGAGTTGTTATCTCTGGTATAATGCATTGCAGTGAAAATTGCGCCGCTTGTAAAGTAAAGCTGTGAATAGGAGATAAAGTGTTTTGAGGGAATAAAAGAGTGATGAGAGGAGGGAGAGAGGTGAACCATGAAACATTCCTCACCGTACCCTGTCATTACAGAAGTTTGAACAGTGGTAATCTTTAGAGTGGTTATAAACTACTGTTTTTGTAGTAGTTGGGTTGGCCATATTAAATCAGGAGTATCAGTGACCACAGTATTCTGGATAGTAGCTCTTATTCCTGGATAACCTGTTTACATGCACCTTTGATATCCCGTTCACGAGTATCCCTGTATCCGTGAA…
CLocus_74004	1	304	46.19	24.59	74	46313	TGCAGACAGGGTTACCATCTTCGATTAAGTTCCCCTAAAAATCAAAATATTTTTACACACTTCAGATTTGGTCCTCTTAGAAGGCTGAAAAATCTCCCGAGGGCTGTCACTGCCTTCAGTCATGTTTTCACACACAACAAGAACCCACGTTGCATGCTGCGCCTGCATCAGACAATGCTAACTTTTGTTGATGCTGGACAGTATTTACAGTGAGTTTTTCAAACCGTGGTAATCAAACACGGTTTTAATGATAGGAAAAATTATCGTCTGGATTTTTACCGTGGTTCATCGTGAAGCCGGTAACCCTTTCATCTAGAGGTCGACCGATTTAATCGGAATGGCTGAATAATTAGGGCATATTTCAAGTTTTCATAACAATCGGAAATCGGTATTTTTGGA…
CLocus_28383	1	305	46.19	24.59	271	19291	TGCAGTTTAGATGGTACAATGATTGTACACTATGCATTGCTTGTTTTGTCACATAAACTGAAAGACGGCGAACAATTATAATTTTAGCATCCGGGAAATGGGGGATTGATTTCTGCATTTTGCACTTTTAAAGAGCACATATTTACATACAGCATGCACCTGTGTCTCTTCTCTTAACCAAAATCCACCACGGCTCCCGTCGAGATTAATTTCACATCCTTCGCCTTCAACATGTGACTCGTATTGCACCTGCTAATCACCACACTCTCTTTATAAGCACTGTTTTAATTTTCTAACTTTGGCTTTTCTTCTGACCTTGCCTTTATTGACACATTGAATGAGTACAACAGAAAGCTGGTATTGAATTTGTGATTAATTTAATAATGTATTTCTTAATCA…
CLocus_28922	1	306	46.19	24.59	120	19652	TGCAGTTTTCCTTGCCTAATAAATCCGACTTTGATACCAGTTGTTGGTATACAGTCTGAAACAAAGCACTGCAAAATCGTGGACATTTTCCTTACAAACCAGAATATTAAATAACATTTCATTTGAACTTAGATTGGAATCCACCGGATTGTCTGTGCCGTTGGTTCTTCAGCTGTTTGAAATTTGAGACAAAATATCCATAGGAAAGTATTGTTTACCCAGCGCCGGTACTAAAGTTGAAATGTATATTACCTAGCACATGAGCAAAACCATGTAAACACCTGTTAGTATACTTCTGTCTTGTGGACGTGCCTTCGGTCATGAGCAAACGCATCTTGATTGCCACACACATAGACCTGTGTTTTAATAATAATAATACTTTCCTACGGACAATTGGCA…
CLocus_29700	1	307	46.19	24.59	176	20154	TGCAGCACTTTAATTCCAAAGTTTCAAACTTTGTTATACTAGCTATGGCTTTTAGAATACTTAATGCTGGTTGTGGCCCATTTGTAGGAGAACGAATTTGGAGTCTCAACTGACCAGCAGCAGACAGAACATCAGGTTGAAGCATTGTTATTGGTGTTACCATTCTGGAGTTGTGCGATCGAACAGTGACAATCACACATTTTGTCTACAAACCCCTAACAGCTGGAACATCTAACTGCTGGTTTGCAATCAAAGCTTAAAACACGAGTCTGGGTTTTATAGGTCTTTTTGCCCGTAATCCGCTTTTCCAGCTGTCCTTTTACCTTACCATTTACTTTGGAAAATCAAGGCCTCTGTCTGTTGACTGAAGTTTACGGAAAACACATCTCTAAAAATGAT…
CLocus_1902	1	308	46.19	24.59	93	1601	TGCAGGCACCTTACTGCAGCAGTATGATGCCATCTCATCCCTTGTTAGGACTGTGTGCTTATCTGTAAGGAGGCCTGTTTTGCATATTTTTTAAATTCTATTTCCTAGTTTATCCTGGGTAAACACAAACGTTATAAATGCACTTAATGTATCTCAACTTCAACTTGAATTCAATTAATCCTGTCAAAACACTTACATCAAATCGAATCAATCAATCCATTCCCCACTGCCACTTCAAAGGCATAATTAACCTTGGAGACTCTTTCATCCAATACATTTCCACCAAAAACCAAAAACTGCGGTTCCAAACAGGTCGACTGCGTCTTAGCAAAACACACTGGCAATAGTGTTGCCACTAGGAGGCAATGTTGGAACTAGATATAATATTTGAAAGACATT…
CLocus_58802	1	309	46.19	24.87	136	38159	TGCAGAGGACGTTCAAAGGGCCGTGCCACGACACTAGTATGAGGTGGTGAAACAGTTGCCCCGAGCACGGAGCAGTCCCCAAGGGAATGTGTCCTATGTAAAGTAGACATATCTGAGTGGTAGACTTAGATATTATAAATGTCACTGGGGGACGGCCACGTCATAATGGCAGGTTTTGGTAGAGCTGAGGCAAGTGCGAGCTGGGGACATTGGACGCTATTGGTCAAAAGACACATAAATGGACTAGACTAGATTGAGGTTGTGCACTAAAGAACTGTGGCTGGGCTTGAGGACCTTGGTCCGTATCGCCTGCATGAGGTGGTTGTGCTGGGCGGTGATGCAGTCAGTGAATGCCTTAGATATGGCCAGTGGGGTCGAGGTGTAACGAAGCGTATGGGG…
CLocus_94034	1	310	46.19	24.87	230	55970	TGCAGCCATTTAAATGCAATGTCACACAAAAGCTCAGTAAATGAGCCGGAAGAGGCTCTTTGACCTCATTGTGCTATCCACTGATATGTTCATCTGACACCAAAGAGAGGACAAGAAAAACAGGTAAATCCTGGCCTTTTGATCTTACTGTATCCCTCTACAGTGCATGTGTGTTCAAAAGTATCAGGAGTCATTAAAAATCACCAGCATTGCTGTGAGGCTCTGTGCTGTTGAGATGAGAAACCAAGGTTACAGGAGAGCACTGGGTTGTCAGGCCCCAGCCTATACTCAAATGGGCTTTGAGGGCTTAGAAGATGAAGGACCACATCTACCAGGTTGTATGCCATTTTTACAGACCCAAACAACCAACATGCACAAATTGAAGGAAATGTATCCATG…
CLocus_93324	1	311	46.19	26	151	55663	TGCAGTAATTCAATCTCCACCTCAGTAACGTCGTTGAACAAAACCACATTAGTACTAATCAAGAATTCATTTTCTGGAAGGCGCGCTCTAAATTATTTTTGGAGAAAACAGTTGAAAAGTATTGGATTTATGTGTTTCACACTGGGAAGACATTTTCATTAGTTTCTACGTGCCAAAGACATTTGACCCTGATATTAGAGTGCCAAGCCCTTGTTTCATTGAAATGTACAGCAGCCAATTCACAACCAAAGAAAACAACAACTTGTGTTTTTCATGTGTTGGTGTAATGAATCAAATGAATATACTGTATGAACACAACACAACTGGTCCATTAAATGCTGACCCAGCAGAACATTTTCTCTGTCAAATTTAGTTCCACAAATCCTATAGAAAATAGAT…
CLocus_82958	1	312	46.19	26	139	50800	TGCAGGTCCTCTATTGCCTCTTTGAATTAGGATTACACTGATCCAAGCCTGAAAGGAAACTAGGAGCTAGTGGCAATAGCAGGAGCAGTGGGACTGGGGAGCAGAGTCAGTGTGAGAAAGGAGAGTGTGTGAGATTAACGAGTGGGTTAACAGATACTTTCATTCTCATTCCCCAGGCCAGGATGCTAGGGTTAGGTGCAAATAAACATGAACATCATGCATCCTGAAGGTTTCCACCACCTTTTTTGGACCTGTCCTAAATAGTACTACCTTTCTAAGGTAACATAATCCTTTACTTGTCTAAAAAGGGCCCTTGAGGTGGAAAATGTCAGTAATGTTTTCTGCACATGTGCAGACTGAGGTAGAGGAGGAGGATGTAGGTATTCGTCCCCAGCATCC…
CLocus_128823	1	313	46.19	26	40	68186	TGCAGGCGTTGTGGGAAAAGAATACACCTAGCCCTCCCATCCTCGTTTCTAAAATAAAGAAGAACAACAAAAACTTGTTCTCAGAATATATGTGGTTACCTAAGAGAGAGTGACCTGCTTTAATACCACAGGAAACACTGAAAGGAGAGACGTCTCACAGAGACCACGTTTACATGCGCACAGTATTCCGGATGGTAGCTCATATCCCGCTTTTGGTCTTACTCGGGATAAGCTGTTTACATGAACCTTTGATATCCCGTTCACGAGTATCCCTGTATCTGTAAATAAACAGAATATTCCTAATTGAAGTTCATATGGGTTAAATGGAATAATAACTGAAATCTGGACACTGACTGTAGGCCTATAACCTCTCACATATACAGTAATATAATATTAACT…
CLocus_77227	1	314	46.19	26.57	135	48001	TGCAGCGGAAAATAATCACACAGAGTTTGTCTACACGTCCTAGCCAGAGAGAGGGTTCAGTAAGGGTTTAATGATTAAAGTTATAAGGTTTTGTGCAAGCTACATCTTGAAAAATCCTCTGAAACAAGCATTAGGTAAAGGCTTGGAGGAAGTGAGCAAGCAGAGTGTTAGGTTAGCTGCTGAGGAAAACCTGCCATCTGATTGGAACAGCAGGACAGGTTAACAGGCTTCAGCTGGCCAGCCGACCTCTTTAACCTCCCTCTCTCATGACTCCACAGCTAAATTAGGGTGCTAATAGATGAAGACTGCGCACTGGCCAGTCGCTTAATGTGCACAGTGCAATAGCACCACAGACGAGAGAAGGAGAAAGGGAGGAAAAACAACCAGCTTTCTGAACTA…
CLocus_33308	1	315	46.19	26.57	234	22568	TGCAGTGCGCGTTTGGTTTACGGCAGAAATGACAGCAAGAAATGCATTAAGCATAAACTCGTGGGGTTTGACATTTGTCAAAAATAACACAATCGACAGCCTTATTTAGTCGTAAATATAAAGGTGAAGAACTAATCAATGGCACAAGAGGGGGATAGACTATTGACATGTTAATAAAAGGGTGGTGTGACGTCACACCATCAGCGCTTCCTAGTTTACAGCAGTGTCACAACGTGTTGTTACTTGGTAAACACAGAGAACCAACCAACATGTCAAGCTTGGCAGATGTCGGCAGGAAACTCCTGGAAATCAAAGCCAGACAAAAACGTTCAGGTTTGACATATTCACTTGATTGACACTGTGCATTATCTGCAAACCTCTTGAGTGAAAAATCAACGA…
CLocus_54991	1	316	46.19	26.57	88	35891	TGCAGTGACCTGGCCTGAATTGGTCATGGTTGTGTTTTCAGATGCATGGTCAAGTTCAATTACGTAGGCTACAATATACATAGACCGACACCAAAAGTTATGTTATAGAAACGCTGCTATGACTGGTTTGTTTGAGTCAATGAACATAGATGTTCACTTTGGGCCTGAACTGTTTGACTGAAATCAGTCCTCTCCTGATATGATTTGAATCGACAAATGAATACAAATGCATTCTCTCATCATGTACTTAATAAATAGATAAATTCATTATGCTAATAGTTTTGGACTTAACGTAATCATTTTGTCTGTCCTAGTCTGCCGGGATGTACAGTAGGAGGGACAAACCATTGAATTCAGTTACAAAAATCAATAAGCCAGAATAAATTGACTTTGACTTGA…
CLocus_44003	1	317	46.19	26.57	17	29210	TGCAGAGATGGGAGACGGCGATAACAAAGTCTTAATTACGTTTCAGGAGGGTTGGGAGATGTTGTGCTCCTCTCTCAGAAGGCAAGGAAGCCAAGCATACCACGAAAGTGAGCTGCTGCTTTGGTCCCAAAAAGATTCCTTAGGTGACTGTCTGAGAGCTAGTCAATTTGAAGAAGGGTTGTTCGGTAATGCAGATATATCCTTTGGTCTGTTTCATTCAGTGTTCTTTTAGTGTGTCCTCGTGTAATTGATCCACTAAGTTTAAATGATTTATGTTACCTTTGGTTTGTGAATGCTACATGAAAACAGAACAGAACCAAGGACACTATCTGACAAATGATTAATACCAACAACAACAAAAGGACTGGAGACTTATTACATCCTCACAGTTACTGTTGA…
CLocus_74852	1	318	46.19	27.13	267	46793	TGCAGCAATGGTCTGACAAGCACAACTAGCGCTGCATAACAAATGAGGCCTAATTAGACAAAAGAACAATTAAGTCGTTCAAACGAGATACTAAGTCAATCGAACAAGATACTAAGTCGTTCGGACAAGATAATTCCAATAGTCCAATTTATTATAATTTTTTTGCCTTGGGCTTCCGGAACATGGTGCATTTTTCACCATTCTGTTTTTTTGTACTTTTTCTTCAGCATCACGAATCAATCAACGTTCGCAAATTATTGTTAATCTTGTGTCTTTATTGGACATTCCTGAAAACATATTGGTTCTGTTTATTGATTGTCTGGGTCAGTGGAGAGACAAAGATCTTGACCAATCAAATATCACTTACATGAGTTTGAAATAAATCTGCTGGACTAGCCT…
CLocus_58612	1	319	46.19	27.41	83	38041	TGCAGGTAGGATGATGCAGTCTGCCTTGATATGACATGGACTGAGATTGAGATAAACAAAATGTTTTGATAAAAGATTTGATAGATTTGTAAGGGTGACATTAGCGTAATTCTAACAGTGAAAACTTTATTAAGGCAAGCGTATAGGGCCGTGGTTCACTTCCTCCAGTGAATATCTGAGGTTCGTGGAGTTTTCGACTTCCCAACCATCTCTGCTGAGGTTAGACCTCTAGATCAGATGGTTTTGACCAGCAGTTAACATAATGTAGTGCTCGCCAGAACCCAGACTCACAGCCCTGGTAAGGCACAGATAAGGAGGGGGGGGGTGGTGAAAAATGTTTACATGTGATAGCTGGTTTAAGACGTAGCGGTTTGCTAGTAATTGGGAAAGCTGGCACAG…
CLocus_81003	1	320	46.19	27.41	18	49755	TGCAGTATTCTGCCTCCCTGGTGTTTGGACGACAATAGCTCTCAGAACTGCCGGTAGTGTGATTTGTGATTTGAAAAGGTTGCTTTGATGTGTAACCTAACGAAGTGTTGATTCAATGTCAGAACAAAAACCCTGGGGTGATGTTTGCCCACGTACCCTTTGATTCTTATTTGCTGTCATTGCTCAAACAAACCAGCAGGGTTATCAATTGCATCATCCTTGTTAATAATGAAAAATAAACATTTAATTTGTCTTATTTTAACATTATATCTGTAGTTGCCACAGTACCAGTCTTTGGCCTAGTGTTTTAAATTGAAAAAGACAGATATGATCAAATCTCAAACTAGACTGTGCAGTGCTGTGTATAATAAAGCATGAGGGAATTATAGGCTTATTTGA…
CLocus_33952	1	321	46.19	27.69	139	22918	TGCAGGCAAATAAACCGAACCAATGTACGGTAAGGGGTTATAACACGGCGAGTGCCAATTCTTTTATGATGCGCTGGCTGTTGGTCTGAAATGAAGCGCAGTGCGTGTTTGTAGAGACGCGTCTCCTTTGATGGAGAAAAGGGGTGTCGTAATCAATATCATGATAAGCATTCAGGAACCTGACCAAGGGGAAACATTTCGGAAGACTCAAAAAAATTAAACTGTGAGCCACCGTGTCAAGGGCCTTAGTCAAAATGAATAGAACAAATACCACTTCAGTTGTGGGAAAAAGCGGTTATTATCCACGTTCCATGAGATGTCCGTCACAGAACGTCTGTGAATGGTCTTAACGTATTCGTTTCCTTTCTTATCAAGGACAGAATCAGTGTTCTTTTTCTG…
CLocus_74658	1	322	46.19	28.54	96	46665	TGCAGCTAACGCCAGCCACTGTCGACAAAACATGCATGCCTCCCGCCTGTACAGGAAAGAAATAGTGAGCTAAGCACTCGTAAATCACCTGGCCTTTAGATCTCTCTTCCTGTAGCTGAGAGGGGAAAAACATGGAGGGGGAGTTCACCGTGTGGTGGGACGGGATGGGAGGCGAAGTAGGGGAGGGAGAGAAAGAGAACAGGCACAGAAACATGTCATCGGTGGGCACTAGTAAATCTTCACAGGGTGATCGAGTGCAAGAACATTGTGCCGTTAGGAGTCTGAGGAAGAAAAAAATAAGATGTTTCTCTGGTGTTTATCTAAGCACCGTGGAAGATAAAATAGATATTCTTTCCCATTAGCGGACTAAGTGTTTCATTTCTACAGTCAGAAACAGAC…
CLocus_91234	1	323	46.19	30.54	33	54811	TGCAGATTTATTGGCTTTGGTGTTAAAATGACTCTCCCCCATGCCTTCCTTTCTCCGTGTGTGTTTTAATTACATTTAACAGCTTTATGTCTGGGTTGTGTTTTGAGGAAGGAGATTTCACATGGGTGTCTGGCCTCGATGTGAGTGCTGTTCTGACTGCTTCCTGAGCAAAGGCATTGTTCTCTTAAACAGCTGTCGTTTTGGCTGATTCAGAACAGATGGCTGTGTGCGTGCGTGCGTGCGTGCGTGCGCGCGCGTGCGTGCGTGTGCGCGCATTGCATGATCAGGGTTGCTGAGGGTTGTTGAGTTGTGTGTGGTATTGGATTACATGTTAAGATATCCCATCTTTTGTTGCTCCGTATTCCAATTGTGCTTTTCTGAGCATTGCTGCATCTGTTC…
CLocus_17892	1	324	46.19	32.25	147	12304	TGCAGGGCTATTCAATATCCATGATCCAGACTTACTATCCCATAATAATGACTTACTATCCCATAACTCCTAGTCAGAATTTGGAGTGTGACGGGAATGGACCGACCCTCTTAGTGTTAAAAAGTGAGGTAATGGTGTAAGGAGGTACAGAACATCTGCTATAGCATAATATGTTTGGGCACTTGGCAAAAACAAAGTAAAGGGAGAAATGTCTCAATTCATAGCTGGACCCACCCATTACTCATAAACTACACATGCATATGGAGTGTATGTTAGACTTTGAGCAAACAGACTGCACATATGGAATGGGAACATTAGATGGGTTTCTATCAGTTTGTGGCCTAAATGACAGCTCAATACACTTTCTTTGTAGTCCTATTTGCTTATGTCTAGATTGCT…
CLocus_40709	1	325	46.19	32.25	340	27099	TGCAGTATTTGTGCGAAGCCTCATTAATGATCAGAACTGCCAAACATGTAGTGCACTCGACCCCAGTCTGAAGGGGGGAAAAACAGTGGTGTGTTTGTCGAAATGTAAAAGCTTCACATACGGGATTGATGTAACCAATAATGATGAGATTGCGAAATGAATACGGCAATTGAAATGTTTCTTTTTTATAACGGTGCTCCTCATTTAGTGGATGTCATACTTGAAAGTGTAATTTTAAGTTACATTTGAACGTTTACAGTCACAGAGGGTTCAGAGAATCAAATTGCTTAAAATTGCGCTCACTCCGTTTTCATTAAAGTAGGCTACTTTAAAAAAAAATCTTCATCAAAGGCCTGGAAAAGATTAATTGTACTTTGAGAAACTCAATTTGAAGAAAGA…
CLocus_99230	1	326	46.19	32.25	80	58027	TGCAGAACACGCAGTTGATCCCGAACAGGACACACCTGTGGACAACCCAATGCATCGGCCAGAAGAGACTAAGAACAAAGTGGAACGGACAATGGACTTACCTGTAGACTTACCCATAGACAAAGAAGTTCCAGCTCTTCCGTCACCAGCTCACAGTGACTGCAACAGAGAAATAGAGCAAAAGTCTCAGTTGCCTATGGGAGAACACAGACGGCCAAAACTCTTCACGTATGACAAGCTTGGAACTCCAGCCTGTTACAATGCAGGACAAACAAACAATGTTGTGTACCAGTACCAGCCCTTGCACTATGCAAATACACAAGCAATGGCCTTATGGACAACTCTTGTTCAACAACAAAAATAGACAAGCACTGGCTAATACAGAAATAGACTGTTTAG…
CLocus_86586	1	327	46.19	32.25	61	52633	TGCAGGGTTTTTTATTTTAGTTGTTCAGAAATACGAGGCAGAGACATAGGCTACATCATCGTGGTTCAGAAGAGGGTGAGTAAACAGAGAAACATAACGGGAGGTGGACTGTGTGTAGTAGCTACGTATTGTGCGTAAAATAACACATGCGCATAACGTGATCTGGATCCTTAGCTTTGAGAAAGATGTTTCCGTAGGGGCGGGAAAGGGCGAGACGGGGTGAAAACTCCATATTCGTAGCCTCAGCCTTTTAAGTATACAATGTAAACTCAGCAAAAAAAGAAACGTCCCCTTTTCAGGACCCTGTCTTTCAAAGATAATTCGTAAAAATCCCCAAAACTTCACAGATCTTCATTGTAAAGGGTTTAAACACTGTTTCCCATGCTTGTTCAATGAACC…
CLocus_54193	1	328	46.19	32.25	138	35452	TGCAGTGAAAAGAATCAGCGCATTACAACCTTATTAATTTGAGATTTTATAAACAAACTAAAAAAGGACATTCTTGAAGAAACGTGGACTCAGCTGGCTAAAAACTATTTCCGTGGTACTAGTTGAATAATTTTGTGAAAGTTATATTTTAGAGATGTCTTTAAAAAAGAGTCACTTGCTCATGTACATACTTTGCGTCCTTCTCCAACACGGGCATATTTCGGGGCTTTCCAGAGGGCCCGCAACAAATCAACCTCCTGAGTTTTCTTGCGTTTTATGACACTTACTGTAAGCATAAAAATTATGCTTGCAGGACATAAGACTAACGCACAGTAAAATATAATTAGCAGTCGGAATCTACTAAAAGCGGTAGCAAAGGCGTGTTTTCTCCTCTGTCCC…
CLocus_11512	1	329	46.19	32.25	85	7800	TGCAGGTAAGTCACATCATCATAAAAAAAAAACTAGTCCGACACCCAACACAGAAGCCACTGCAAAAAATATGAATAAGTAATGGAAATTATAGATGCATCGACGTGCTTCTATCATACTGGCTGAGTTAAATATGGCTGTTTATGCAGTCTTTCTTGTTTTCTATTCAACAGTCATGACATCATACTGTATGTTTGGCATCATGTCTCTTTCTACAGGGCCTGTACCTGGTGTATAACCCAGTCCAGCTTTCCACAGCCCATGCTGCTGCTGTCCTCCTGTTGGGTCTGGTGGGTTACTACGTCTTCCGCTCTACCAACCACCAGAAGGACCTGTTCCGCCGTACCGAGGGGAAGTGCTCCATCTGGGGCAAGAAGCCCACCTTCATTGAGTGTGCCT…
CLocus_43435	1	330	46.19	32.25	20	28899	TGCAGGCTTGGGTGTGTGATACCATTCAAGGACAAATGCAAGCCTGGTAATAGATAAGAGACAGAGGCAGTGGACGGTTGCTGTGCAGAGCAGAGAGCCCTGGCCTGGTTTATCACTCGGCTTTGAAGGCACAGACGTGTAGAGAACCGCAAAAAATACGTAGAGATCCCCAGCGACACAGCGCAGAGATTTAAGATTTAAGAAACAACATGTAGATAATCGTGGCACCAGGATTAATAGCGGGATTTGAAAATGGAGGGCAGGGGAGATTACTTGGTCCCTTTCAAACGCTAACAAATAACATCCCCATGTGCAAGCAAAGAACAGGAAATGAGCAAAGAAAAAAAGCTCAAGTACAGTAAGAGGATTGGGCTGAAATCATGCTCCTGATTTCTCTGA…
CLocus_210	1	331	46.19	32.25	175	264	TGCAGGCTGATAAAGAAATCCCCATTGGTGTAGGAGTCGTAAAGGTTCATCATGCTGTCCTCCCTCAGTGCCACTAGTTTAGTGGGAGTTTTGCCGTGCTTGTGATGTGAGGTTTATATAACTTCCCCCCCCATTGATTCAAACCCCATACTTCACCCCTTTCTCCCTAGGGGACGCATGTAGTCGTTCCTCCCTCAGTCTCTCTCTGCCTTTCATGGCTCCATCCCGCTGTTTTGGGGCCAGACGATGATTAGAGTTGGCGTTGAGAGAGGGGCATCGGCTCCCCATCCCTCCCCCCTGCCAACCCCCTCCCCTCCATCATACGAAGCGACGTGTGCTCAGTGACCCCTGGAGAAACATCTTCTCCATCTTTGATGTGCGATGATATGTGCTGGCCGA…
CLocus_6872	1	332	46.19	32.25	89	4723	TGCAGCGAGCCTAGCAGAGCCTGTGCTCGCTCCCTCCATTCCTCAATCTATTACTCAGTGTGTGTCTTTCCATTTCTCTCTTCCTTTCTCTCGTTCAATCCCTTGTACCTCTAATCCCTTTCGCTGTCTTTCGGTGTCTGTGTACCTCTCCCTCCCTGCCATCCCTCCATTCTCTGTCATTCGCTCTCACTGTATTTCTGTCCTCTCTCATTGACTCTCTCTCTCTCTCTCTGCTCCACTTTTTGCTCATCTCATACCTCTATTGGTTCCAGGTTATCACTCACTGGCTAAATGGTTTGTCATATAACCCTCATTCCATCCCTAGCAATAAGCCAGCTGAGACTCCAAACCCACAGTGTAGACTCCATAGGATAACCCTTTTGAGTTCCAGATAGAACC…
CLocus_44363	1	333	46.19	32.81	180	29407	TGCAGTACTGTCTAAAATGTAGCACGTCTAGCCAGACACAGCTGATTTATTGGTATGCCTTGTGGCTCTGTAGGTTTCTCTTTTGAGAAATTGAATACACCGATCTCACAAACCGAGAACTTCAGCATCAATAATTGTACTGCAAATACCTATTGTCAACAACAAGACTGGTGATAGGGCAGGCGTATGACTATTACCTGCCCAGACCAATCAAAATGTCTCTCAAAAGACAGGCCTCATCATCCCACCACAGATTATGTAGCTATGTCCTCATGGGGAGAAAAACACAGTAGTACCATGGTTTCAAGGATGCCAAGGGAAGCCAGGCTGCGTTTTCATCATTTTCCTTCAATTCACAAGAGGCTGATTGTAATCTCACCGGAGAAAGCATATGAGCGA…
CLocus_30375	1	334	46.19	32.81	208	20698	TGCAGGAATAGCATGCACATCTTGCAAATCAGGACTCTGGACATGCCATTAACATTAATAATGATATATTCTCATGACTAGGTATCGCGATAGCCAAGTCTCAGGGGAAAAATACAGATTGGGACAGGACTGAAAATATGGTATTTAATTAAGTACATCTCCTTCATCAAAGTTGTGATTGTTGAGTACATTACTGTATACAGTGAGTAGCCTACAGCACACATTTAGCTTATTAGACAAATGTATGTCTTTCTTTTTCTGACTCCTATAATGCTCTGTGCATTTGCATATAATAAGCATCCTACATGGCCATGCCTGCTCTGAATTTCCATGAACTTTCCCTCAACCTCCTCTCTTTCTGTCCCTAGTCATCAGTGGGTTAGGCTGTGCAGACCACTT…
CLocus_46070	1	335	46.19	32.81	189	30455	TGCAGTAGGAGAAACGCCTGGAATTTTAATTTACAAAGCGGATTCAAAGTTCAGGGCCATTTCACAACTCAGTCTCTTCGGAGGCAGCTTTGACTGCTTGACTGTTTGGATGTACATTTTTTGGAGGTATGTGATGAACGTTGAACAGCTGTGCCCTGTGGCATGGGCAGGACAGCAAGGGTTGGACAGGGCAGGACAGGAGCGTGGGCAGTCGGAGCAGGGCACGAGCACGGGCAGCAACACATCTCCCTCCCTCCCGCCTCTCTCTGTATCGCTCTCTCCCTCCTCCCTTCCCCTCCCTCCAGCCTCTGCCTAGCTTTCTCTCTCCCTCCCTTCAGAATCTCCCTCCCTCTAGCCTCCTTCTCGCTTCCTTTCTCTCTGTGTCTGTCTGTCCGTCTC…
CLocus_34484	1	336	46.19	32.81	145	23291	TGCAGCTACTGTATGACAAGTTTGCACACTATTATTGGACCCTATTATCTCTTACACTCACCTATGGAGCTGCCTGGGCTCGCTAGAGGGGTTTAACCCTTGTGTTACTCACGTCGTTAAACTGATGATTTGCTTAGTTAAAAATATATATATTTCAAACTATTCCTCACAGCTTCTTATTTAGTTCAAATCCTTCACGGTTCATACCCATATACCGTAGCACTCGTTAGTTTAGGAGACGGAGAACATATTCCGCATGCAGGCACGCACGCACGCACACACAAACACACACACACACACAAACACACACACAAGCCCCACCCACATCTCATCACTCTCTCTCCCTTTTAGAGATCAAAGTATTTTATTACTTCTTCTCCACGGATCTCCTCCACATTC…
CLocus_37129	1	337	46.19	33.09	67	24883	TGCAGCAAAGACTTTGTAGCACCATTAGTTACCTAACCAGGCAGTGACCTGCCCCAGCCCCTCCACAACATGCCGATGGGTCCTCAGCCTTATCAGAGCTGACTGGCTCTCACCTCAAATTCAGCCCTCTGTTTCACCGCTGCACTGCCCAGCACAACCCTCTCTCTCTCCTCGCTAGCTGCCTCGGGGAGCTCACATTACTGTGCTTCTTCTAACAGAACAGTTGTGTGCTTTGGCACCGTGGTCATGGTGTGTGTTAAAAAGGGGGTCAGCTGATGTTCTTGTTGTTTTTGTTCTTCTGAGAGCGTTCTGACTCTGACATGGGAAGAACGCGCCGAGTCTGACTGAGTGTTCTGCTCCTTAGCTGCAGGCTCTGGACTGGAAGAGAACAGCTGTTAA…
CLocus_96734	1	338	46.19	34.51	86	57120	TGCAGCAGACATGGTGAGCAATATGTTTGGAACATCGAATCGCAACAAGATCGCAGTATCGCAATAAAATCGCGAGAATTGCAATACATATCGAAATCGGCACCTAAGTATTGTGATAATATCATATCGTTAGGTCCCTGGTAATTCCCAGCCCTAAATTATATAACGCATTATCTGCAAGCAAGGTCATGAAGAAATACATGCCATTTTACAGTTTGTTATCAGAAAGCTCACCAGACACAATTGCCCAGACAAAAGCATTTCCGAAGATTTTTGGGGAAAAGTGATTCAGTATTGAAACGTGAGTAGCCAAAGAGCATGGTTTTCGGCAGTTCACAGAGAACTGACAGAACCGCTGACAGTGAGGGTATCCCAGTTCGTGACTGACCTCTAGGCCTA…
CLocus_81451	1	339	46.19	34.51	63	49999	TGCAGAGCTAATAATTGCTGGTTTCCTGGATAGTTTCTTCATCCTGTGTCCTCTGTGTAGGTTCCTGTGGGCCCATGACCTCGCGACCCTTGGTGTCACCTCAGGCATCCAGCATGCGTCATGCCACACTGTGGCGGGGGCACTGGGGAATTATGGGAAGATGACGGGGAGAGAGAACGGACGTTTGGGTTAGGGTCTCCAGCACTCTCCCTGTCACACATGGACAGGGAGCAGAGAGCGGCTGTTCTTGGCCAAGCAGAGATGAGAGAGAAAGAGAGAGAGAGAGAAAGAGGAATGAGAAAATGAACTAGAAAAGTAGACAGAGGAACTGTAAGTCAAGCAGGGGAAAATCCCAGCTGACTCCCCTCAGAGAGAGAGAGAGCAGGCGCTTTAGTAACA…
CLocus_35723	1	340	46.19	35.08	52	23998	TGCAGTTATTCTAATTGTGCAGCAAAGGGCTCGGGGGCCTCACCCCAGACACCCCACTGCAAAATCTAGCTTGACTTGTGGCCGAAACAGTCCATTGACTCTGAATGAGTGGGACAGTGCTGGTGCATGAAGTGGTTTCAGTGGGGGGTTGAGAGAGATGTGAGGCTAGGCTCCAGTGCCTGTGGGCATGAGACATGGAGCTCTGCCTCACAGAGATAGGCTTGTTGTGGGTTGTGGATGGTGGCTCTTTGTGCCATTTGGCACAAAGGCTTTGACAGAGTAGATACTTTTTATAGGGAGGTCGTTACACATCCTAGTGACTGACGTGAGGTCTTGTCTGAGCATATTGATTAAATAAGTGAAGGTCTCCAGTGGAACCCTACCAACAAACCTAGATTT…
CLocus_23740	1	341	46.19	35.08	25	16175	TGCAGAAGTGATATTAGTTAGAAAGCATTAGCAGATTGCAACACACTTTCCATAGTTGAGTTAGAAAATCAAGTGATAGATTGCGAAACCAATAACGATGAGGCGGTGTGAAAATGTTTATCACATCAGAGTGGTTTGTCTCAATGTGTTGAGAATGTGGGCTTTATCCCCAAAATTGTGAAAAACCTAGGTCACAGTTTACGTCTTGTTGCACTATGCCAACAAGATCTCACAAACTCACTTTGATGGTACATGGACTTTCTTCGTGTAACACAGTATAGTAACTCATTTGAAACAGAATATTGACAGTATATATATTTTTTTTAAATATGTGTGCCCTATCAGTACACTTGAAAATCTCATTTCATTCTGCTTTACCACAGCAACCATAGAGAAACA…
CLocus_659	1	342	46.19	35.36	107	776	TGCAGCACCCTCCAAAGCCAGAGTACAACTCCTCACTCCTCCAGAGGCTTCAGTTGGTTTTCAGCCACTACTATGTTACGGTAGTGGGCAACGCCGTGGCCCTGACTAATGTCATGTGCATCTGTGTAAGTCCAGGACCTTCTTACAGACAGGATGTCGTGCCTGTTGTTTGTGTGTCCATCATATTAGACAGAGCCTCAACTTGTTTGGTCTCTCGGTGTCACGACTTCCTCCGAAGTCGGTCCCTCTCCTTGTTCGGGCGACGTTCGGCGGTCGACGTCACCGGTCTTCTAGCCATCGCCGATCCACCTTTCATTTTCCATTTGTTTTGTCTTGTCTTCCCACACACCTGGTTTCAATCCCATCAATTACATGTTGTGTATTTAAAACTCTGTTCCC…
CLocus_70300	1	343	46.19	35.92	166	44264	TGCAGAGGTCCCAGCTGAGACGTGCCCTCACCGTCCCCTGTCCCTCCATCTCCTGTCCTCCTTCCAGTTACACAGTGGACAGTGACAGGTGGATGCCATGCACCCCCACTAATGAGCACTGAGGGGAGGAGGGAGCCCATGTGTTCCTCTGAAGACAACTGGGAGTTTGTTTCAGTAAGGACAAGAATGGGTCGTGCAGGCAGATTTCTGGCGGTTTTGGATGTATGGTGTCAGATGTATGCAGCAGGGAGTTAGGGAGGCGGGGGGACTAGCGGGTGGGTTCACTCCATTCTTGGAAGATGCAGTAAGACCGTCTATTAAGACCAGTGAGGTTATTGATCCACTTATGCTTGATTATGTCTGAACAGTGAGGGACACCGGAACACTGTGCGAGTCTGT…
CLocus_40156	1	344	46.19	37.63	346	26748	TGCAGCCATGTGTGTGTTGCCAGGGCCAATTTATTTTTCTTTCTTCAAATGCAAAGTTGATTGTGTGGGTTGGAATAGGTGGAGGAGGATGAATGTGGGAGGTGATGAGCAAAAACCCAGCGTTCCATCTTAAATGGGAATGAATACAGTACCAATCTGCCTCACTGCTTATGTTTCACTCCCACCTTCCTTAGAATCAAGATTCTATTTCAAAATCACACAAACCCAACAATCGAACATCACAACTGAGATTGAGGGTGGGAGTTGCTCACTCCCAATCTGATTATCCATTTTGCGTTTGACGCTCTTGTCAAAGCAGGATTTGTCTCCATAAAGATGTCTGTTGTTTTTATTGTGTCATCGCTGTTTAACTCTTTTCAATAATGTTTTGATCTTCGT…
CLocus_2357	1	345	46.19	37.63	91	1871	TGCAGTTCTCAGGTCAGTATGCTCCAAGAGCCCCCTGCTTACTGCTAAAGGAGCGCTGAGGTACTGGAACAGCAGATGCCTCCCTTCCTCCCTCCCATCCCCTTCACCTCTCACCCACCTCCAGTCATCCGCAGATGCCTGAGGGTTGAGCTACTGATCAATACTGTGAAAGGGATTGTAAACAACAGCAGGACTCCTATACTGTTACAGTAGTGTTACTTCAGTACTAGAACAATAAACTCATCTTTTGCCAGTATCCCTGTAATCACCAACTCTGGCCATCCAATTTGAAAATCCTGCGTAATAGCATATAGGTCAATCGATTATGATTTTTCAACGCCGATACTGATTATTGGAGGACCAAAAAAAGCCGATACCAATTAATCTGACAATTTTTTA…
CLocus_56844	1	346	46.19	37.63	113	36951	TGCAGGACAGGCATCACTCCACCTTCCCACGTCATCTCATCTTTGATCATCTACACGTGTGTGTGTGCTGCATGTATTAATTCAGTAATTTCGCAATGTTGGTGGATTTTCTGTCACCCGTAATACATTTCATCAAAGGGATTCATTACACGTGATATCTACCACCATGTACATGTCTGCATTCCTTGCTGGTGTTAAAATCAGCCTGGTGGCGGTGTGAGTTTGAACTTTGCCTCCCACGCACTGCCGCATCAACCCAAAGAGAAGTTAGCTCTGTACTGTACTAAAAGCAGAACCATACAGCCACTCAACTAAAACAGAACACTGTGTCTTGTCTCGAAAGGTTTGATAAACTGCTAAAAGTGGCACATGGCAGAATGTCAGTTCACAGACCGAGAG…
CLocus_16260	1	347	46.19	37.63	189	11216	TGCAGGACTCTTATAAAGCTATTCTGTAAGGTTATGACATGATGATCCAGAATTGTTCTAAAAACATACTTCAACGATAATGCAATTATCTCTGAAAACATTGCTGCAATGTTCTGCTAATATTGATGTGTAATGTAACATTATTATGCTGTAGGAAGATGCCAAAGTTTTAAACGAATGGCATTCCTATCCTCTTACATCATTATATTATATTAGGGTATTGTCCAAACAAAGCTATAGCTTTTTTCAACAATGGTAATCAAGTAGATTTGAACCTGCAATCTGCCGTCTTCAAGCCCTGTAGGCTACTTAGTTTGCTACTTAGCTTTCTACTTAGTTTGCTACTTAGTTTGCTGCACCACCACGATCTTAATGTTTCTAGTGGATCCTTAAAGTATG…
CLocus_70900	1	348	46.19	37.63	100	44585	TGCAGCCCTGAGCTTCACACACTTAAACAGCTCTGACACTTCAGTTGAAGTAGCATAAGGTCTTTCGTAACACATCCCCATGAAATTTTTCTGATGGTAACGTCTGATGGTAGAAAGCTCCGAGAATAAGGGATTATGTCAGTTGCTATGCCATGGACAACTACACGTTACGAAGAGCTACTGTGTTTCATGCTGACAATAGTATGTGACAGACCATCTCTAATATACACTGAACAAAAATATATAAACGCAACATGTAAAGTGTTGATCCAATATTTAATGAGCTGAAATATAACACCCCAGAAAATTTCCATACGCACAAAAAGCTTATTTCTCTAAAATTGCACACATTTTGTTTACATCCCTGTTAGTGAGCATTCCTACTTTGCCAAGATCCAC…
CLocus_17149	1	349	46.19	38.19	134	11804	TGCAGAACCTTTTTAGAGTGGAGGTTTTCCCACAGTAGCTTGACAGACACAAATCCATTTAAGGTTTTTGCCTTAGAAGTGATGTTTTCAGTGATGGATTCCACCCATATATCTTAATGACGCTTCCTCTTAATAAGTAGATGACAGACAAGCCTTGGTTGGTTAACCACAAAGAAATAAACAATGTACATGACAAAAACTGTACGGGGAAGTTTCAGATCTAAGATGATTCCCATTCAAACCATAAAAATGTCAAATCCCTCACCCCACACATGTATAACCTGTGTAATTACAAGCTTTTCAATAAACAAAGTTTCCAGTCATTAAACTGGAGGGGTTTCTTGAGGACCCTGATAGTAAATGCTAAGTCCTGGTCGTCCTCTATTGCTACTGTTGATT…
CLocus_87018	1	350	46.19	38.19	10	52831	TGCAGTGTGTGCGGGGGCGTCTCAGGCACCATTTCTGTGCTGCTGCCTGGATGAAGGTCCCTTATGTGTCCAACGACTAGGGGAGGGAGAAAATAAAACACAGCACATGTTGAGACCTTGTTCGCTGGGAGAGAAGATGCAATTATGCAATTTTATACACTTTAGAAAACATGCGTGACTTAGTGACACCAACAGAATCGTATGTTCATCATGTAAGAGAAAAACCACATCGTCAGATCACAACTGTTTACCCAGGTAAACATTCAAACTCATTAAAATCCTCCAAAAAACAAGCTCATTGTGAATTAAGGGAATTCTTCAAGGTGATCTGTACCAAAAAAACATACCTCAAAGAGATACTGTAGATCGGTACTGAGTGTAGTACTCTGTACAATGATA…
CLocus_108194	1	351	46.19	38.76	118	61734	TGCAGTAGGGCAAGATTAGTTGCATTGGAACATTTTTAAATTAGGAAGATTTAATATTACTGTAGTAATAAAAAATAAAATACCATCATGACATTGATATTCCCTCTGTGTGATTTTCTTTTTAGGTTAACGGTCTTGTTTTGTATTGTAAACTTTTGTGGTTCAAAGCAGAGATCTAGATAGTTAGCTATAGTGACAACTCTGCTGAATATGTGTATGACTGAGCCTGTAATCCTCCCACTCACATTTTGAAGAAAAAAATGAAAACATCAACTCCCTCTAACTAGGACACCTGCCTGACCGAGTTTGCATTTGTCTCCATGTTCCTTCCTGCTTTTATGTACCAATTGGAATTGGTTAAGATTAAAGCCCCCTCTGTGTTTTATCATCTCCTTTCTT…
CLocus_51350	1	352	46.19	39.04	96	33650	TGCAGCGCCCCTAAAGAGGCCATGGGGTTCACTGAGTTGTTGTTACAGGAGGTGGGTGACGATCCTGCTGTGGAGATGAGTCAACCCCAAAACAAATAATCAGCCTAGAGGAAAACTCCGGTAGTAGGACTTCAAAGTCTTAATTCACAGACCAGGGAACAGAATGAATGAGAGACTAGGGATGGGGTAGGCAACAGGAGGAAAGGTTCATGAGAAACAATCAACAGTGTTTACAGAGGCAAGTCCATGGAACAAGGTTAAAGATGCATACAGGTGAGGGGGTGAGAGATAAAAAGTGTGACCAACCCTTGTAGGTGTCCCATGATGAGTGTGCCTGCTGTCCAGTACCCGTACCTGAGCTGGTGAGCACGCTGAGGGGACTGCTAGAGGTGGTGAGAG…
CLocus_96729	1	353	46.19	39.04	184	57099	TGCAGAGTTCTGTCTAAGTCACACATTTCTAAGAGGGGCCTCTTTATAATGAGGCAGAGAGAGAGAAATCGAAAACTAAAATACAACTGTAGAACAATACTAAACTTCTACAATGAATATATATATTGTTAATCCGTAGTCTAAAACCCTATAAATGTAAGGAGGGAGGGGTCTTATAACCCCTCCCCTTCTATTAATAAAACATAAGCATAATTAATTATTCTAATACATCAAACATTTTGGTACAACCCTTTTCGTGACCCCTAGGTGAACCCGACACACTCATCTCTGCCTTTTTCTGTGTTCTCGTCGAACCACATCACATTTTGAAGCGTAGGCTATACCACACGTTTTGAATTGTGATACAGTGAATTATAAGTGAAATAATCTGTCTGTAAA…
CLocus_21922	1	354	46.19	39.04	203	15126	TGCAGCACTACATTGTGTTTCATGTGTTAGTGGACCGACTGTGATTTTAGTTTATTTTCATGTATTGTCCCTTTTTCTCTGCCTTGAACAAACGCACTCACACTGGGTAGCTTGAAGCACCTACTGATAACAATTGTAGCGTTCAGCCACAAACAAACACCACTAGCTGTATCCTGACAAAGAAAGCCATAAGCATCTAGCATGCAAGCTTGCTGGAGAAATGTCATTTTCATGTACGGAACAAGATGTGCAGTAGAGTTTATCTGGTTTGTGGGAGGTCAACCCATGTGGGGATATGAGTGGCCAGGAAGGGGCCATTTTATTTCAGACCTCCCTATGTGAACCAAATACCAACAGTAGCAGCCATTCAGACCCCAACTGGTATACAAATAGCTGTGG…
CLocus_25523	1	355	46.19	39.04	66	17306	TGCAGCAGCTTGTTGAGGAGAAGACCCGGCGGATGAAATGGCAGAGTCAGGTAAGGAGCATCCTTGGCGAGGCATGGATGGAAATCGTGCAATGTAACAAGTTTAACTGACATGAGTGGGCACTGTTTTGATGTAGCTAACTTATTTTATTTTCCTCAGAAAGTGGAGTTGCCGGACAGCCCTCGTTCTACCTTCCTGTTGGCTTTTAGCCCGGACAGGTCAGAATGTCATCCTATAAAATGTTGTATACATTTTTTGTCTGGAGGAAGTAGAAAGACACCAAGACTGGAAGATTGTATGTTAACTGTTAATGTTTTCCTTTCATATAGGACCTTAATTGCCTCCACTCATGTCAACCACAACATTTATATCACCGAGATTAAGACAGGGAAGTGTGTT…
CLocus_11976	1	356	46.19	39.04	87	8130	TGCAGATCTGGCAAGATGCATAATTCACAGAAGTTTCATCAAAATCGACCCAGAGCTGCCTTTGATATTGCGTGTGACGAACGAAAATACAAATGTACTAACGGTTTGTGCCTCACAAACCATAGACAGTTAACGAAAAGGTAATCACTTTTCATAGGAATAAGTCTCTAGCCTCATTAGCCAGTCTTCACCTTAATTTCAGTGACACTTACTTTGTATAGAAATGTCACGTTGAGGTACTTTTCTGAGCGTTCCGTCTCATTCATGAGGATTTTATAACGAGGGCAACCCGGAATGGGAAACGACAAAAGCTGAAATATAAATACATTTTAGATGGAAACATTAGTATGGAGGTAGTCAATAACTTACTCTTTAAAACAGAATCATATTCAGAATGTA…
CLocus_39206	1	357	46.19	39.04	93	26166	TGCAGGAAGGTTTGTTGTTATCGGGGTTAGTAGTAATATCTCCATCAACATTCGCTGAATATTCCTGGAATGTTTTTTAAGAACAACTTCTATTGCTCCAACATTATATTGCTTAAGTATTTTCAGGGAACGTTATTAAAACCATCATGTCATAATGTCACACTATAACCTTTTTGAAACCATTGTAGGAATGAATATTCCCTGCTTTTTGTTATGGGTGTTTTGAAAATCATATCCATCAACATGAGCAGAACGTTCCTGTAATGTTTCCTCAGAACCAGTTCTACTGCTCCCACATTTTGTTGCGGCAGTATCTTCTAAGAACATTACCGGAACATTGTGTTATTACATTCCCTGGCAACCTAATGACAACCTAATGACAACCTTAGGGGAATGTTC…
CLocus_14072	1	358	46.19	39.04	99	9750	TGCAGTCTGATCACAGAAAAGAAAATTCAGATATTCTAACATTGTTATCATCCTGTTACATAACTTTCCCTGACCGTAGTCGGAACATCATCATCAGACAACCACTGCACAACTTCAGCAAAACCGAAGAGCATTGACAAGAGAACAATAAAAATTGTAATGGGAAACAAGACAACAGAGAGGAAGCCGAATGCATTTCACACTTTCTATATCCGCTGAAAGTTACCCAAACAGGAAACGTAAAATAGAGGAGGAAAATAGCAGGAGTGGGGATGCAATCAGCCATACTGGAGATCTCTGCTCAACACCATGACAATCCACTCCACTCTTATAAGAGGGGGTTCAACAGTTACACCTATTAAAATGACAGGCATGATGTTGGCAGGCTCTCCCACACTA…
CLocus_44501	1	359	46.19	39.04	179	29488	TGCAGGGAGCCAGAAGGAAGGCAAGTAGGGGGATGGAGATGGGGGCATAAACGGGTTGAAGTGGGGATGGGGAGATTTGTGTTAACTCAAATGTCTGCTCTACAGGGATCACATGCTACGCTGTGATTGATGTAATTTGATATGTAGTACTAGTGCAAGGGATATTAAGAGTTTAGGAAAAATCATTTGTGATGTGACCTTAGTGTAGCATATTGGTGAAAATATGTATTGTCACCTGCTGAGGGTTCTGTCTTGTTTTAAATATGCTGCTACAGCAAGCGACAGTCGGAGCATGGGTAAGATTTAATTGCAACACTCTGACATGTTTTCACAGTACTAGTTGTTGAAAATTTCATTTTAAAATGAGCAGAAATCCGTATCAAAAGGCTCCTCAGATAA…
CLocus_3099	1	360	46.19	39.04	31	2311	TGCAGGCCTTTATAACACATTAACAACAATGTTTCGCTGTACGATTAGCGCAACTAACGATACCACTCAGGCCATATGTGGGTAAAGTATTGAAATTATTCTCAGAAACCAGCGACACGTTTCTCTATTAGCAATTATGATCTACTTACGTTGTGAGGAAGCAAACAACAACCCCAACGGTTGTGTGTGTGTGAGATCTGTGGGTCAAGTAAGCATGTGATGATGATATTCAAAAGTCACAGAGACAGTCAAGCTGGGATGTGTCTACAGTCTAATACCCACCAAGACTCACCTCGTATTTCTGTTGTGACATAGGCTAAGGTGGCCTAGTCAAAGTCCAGACCTAATCCCAATTGAGATGTTAGACCTGAAACGAGCAGTTCATGCTTGAAAACCCAC…
CLocus_112459	1	361	46.19	39.32	275	63384	TGCAGGCGCTGTGGACCTGTGGGACACACACACACACGCACGCACGCACGCACGCACGCACGCACGCACGCACGCACGCACGCACGCACGCACGCACGCACACACACACACACACACACACACACACACACACACACACANNNNNNNNNNGATTAGCTATGTAATTTGCAGTGATTCTGAAGATTGAATGCACTGATACAAACACTCAAACATTTTACAATTGTGACAGAATTGTTATTAGCTCAGCTAGGCCTCCACAGTTCAGCCAACAAAGCAACGTAGGACGGGTGCTCAACAACAATATCAGGAATAAAAAATAGGGCTTACCCAGGAAACTGGTCCATGTTAACTATTGACACAGCACTTTGGGATTC
CLocus_63436	1	362	46.19	39.32	185	40831	TGCAGACCTTGTCCCTAACCCTACTGGATCCTGAAATACCTTACTGCATGGCTTTAAAACATCTCTGAGCTCGAATTTACTGGAAGAGAATCTCCGCAGCCCTCTCCACATGAGGCCTTTAGTAATCTTACATGTCGAGATAATGTTCCAAAGACCTGGATTTATGACCATGATGTGAATGTCTTATAAAAAAAACGAAATCCACGTCTAATCAGTCAATCATCCTTGTATTTTCCTTTATATCCCAAAGAAAAACACATTCCTCATCTGATTGCTGTTTGAAACCTTGTGAGCTGCCTGTATGTCTGCCTGTTTGTAAAAAAGGCACCTCACTTCACCTGCACAGCTTACAACCAACAGACCGTCTCCCCACAACCAAGGGCCTGTGGGGAAGTCAAA…
CLocus_60122	1	363	46.19	39.6	119	38906	TGCAGACCCCTACCCTCTCCTCATTCTTCCCTCTCCCTTTACGCATGACAAGATGACCACTTTGCTGGGGTCACTCCTTTTTATTCTCTGTATTAACAAACGCAAGCAGAAAACCCCCCAAAAACATGCAAAATGATAAGTATATTTTGCTCAACTGAAACTGGATACTTACATTCTGTTTTGGTTTTGAAGTAGTTTGTTTTTAAACATAATTGTATTTTTTAAGTTAAGGTGGTCATTAGTTTGCTGTGTAAAAGTTAAGTCATAATGATGTTGCACAATGACAGCCAGTTGCCAAAATATCCCCTTAATTTTTTACTCCTGCTCCCACCACCACCTAATCCTGCCCCGTGCCACCTGACCCCACTTCAAATGAATCCCATCATAACCAAACCATCC…
CLocus_61423	1	364	46.19	40.73	90	39715	TGCAGCGGTGCGCCCCAGCGCTAGCACTCAGGTAGCTTCACACCATCTGGTATTTCACTGTACCGCTGCCAAGATCTCCTATTCTGTGCGCGTATTCATAAATATTCTCAGAATAGGAGGGCTGATCAAGACCTTTTGAATATGGGCCCTGAGCCTTGTTTCCCGTATTCAACGGTTTTCATGATGCATCGTGACTTAAGTGCAACTGTGTGTTTTGTGAAAGAACAGTCTGGAAATATCTGTAAACTTCACTCTATATGAGCATCAGCATCTAGAGTTACTATATTTTATTTAGCAGTTTTAGTTCAATTATGTTTTTTGTTGGGGAAATGCCTTGAATGCTAGTGATGCACATTGCTTGGTTTAGTCTAGGTTTATTGCACATAATGACTAAAAATA…
CLocus_71770	1	365	46.19	40.73	108	45161	TGCAGGGAGAAGCTACAGTACAGTAATGGTGGCTTAAGAGCAACCGGTCACTTAATTTGTTCATGGTTATGAGAATTAAGGACCCTGGGATAGGAGATGTCTGTTGCCGAGATTATAAAGATGCAGATGTATACAGTCTTATATGTAGCCTATCACTGTCCTCTACTCCATTGACAATAACAGACACCTACTACTTCATAACATCACACATGAGATTGAGTCATCCTGTACTGTCAATGTTCTTTTGAACATTGTTAATAAAAGGTTCAGAAATCTTGTCAGCCCTACGAACTTAGCAAGGCAAAGTGAGTGTTCCACGATAGACGTTTAACAAAATAAAAGCATGACAGGAATGACAGCCTCACACTTTTACCACAGCATGCATAAACAGCTAAATTA…
CLocus_78960	1	366	46.19	40.73	135	48741	TGCAGTGGTCCCACTGGCGTCCTGCATCTCCACGCGGCTGGACAGCACCCCGAAACACTGAGACACTTCCTGGTAACAGATTCTCCTGAGAGAGGGAGGGAGCGAGAAGGGAGAATAAAGTGGAGAGATTGAAGGGGGGAGTGAGAGAGTGAGAAAGAGGAAAGAGTAAAAAGAAACAAATTAAATGTAAATAAATAAATGTGTCGGTATTGATTTACCTGAGGGTAAATCCAATGGATAGATATACTTCTACTCTGTTTAACTATTTCTACTGGTGTTGTTCCCTCTTACCTGGGAGACTCGTAGAGTGGAACCGTGCGAATGTGGAGCTTCTGGATCTCGTCGATGGTCCCGATGGTGAGAGTGCTGTTGTTGGCCAGAGCCAGACTGTCAAAGACA…
CLocus_106019	1	367	46.19	40.73	113	60729	TGCAGAGAGTTCTGAAGTGATTGTAAGAGCACACTCTAACCTCGTTGGATTTTACTGAGTGGCCTATTTACATGACAAAATAACTTAATATCCAAGGAAAAGGAGTACACCAGTAAGAGGAAAGAATCATCTGATTGATAGTGGCACATTCTCTCATGGGGCCTCATGTTCAATTTAACAGTAAAACATTATAAGTAGTGACATTTTACGTCTTACATTATAAATGATAGAAACGGAAGCGACACCCACGAGGCTTATGTGGGTCGACAAAACGATATAAAACACAGCTCTAAGATATTACACTCGCATTCATTCTCTGTTAGATTTTTTTGATAGGGTAATACTGAAAAGCCATTTTTTATTTGATTAAAAAGTGAATGATATCTGTACATGATCACA…
CLocus_35171	1	368	46.19	41.01	216	23686	TGCAGAGTATCTATTGTAATTCTTGTGCTTCACCTCGGTGGTTGGTCAATAAAAGGCTTTATTTAGGCCTAAGCGTTGCAAAGAATGTTGTTTGCCAAGCGTCTCACTTGTTGACCGCAGTGTGCTGCCGAAATAGGTATCATGCTCATTTACTCAAGAATCTCACACATGATTTAGCTATTTCAATGTCTCCGATCGGTATTGAATGATTATTTTTTTTGTGTACACAGATGGGTTAGACCTACACTGACACGCAATAAGAATGGATTATTGTTCATAATAAAAATATCTCATTACTCTTTAGTCAAACGAAGGGTGTATAGGTTGCCATATGGCCTACAGTTTCTGTCTCTCAATATAACTTCCAAGTCTATCTCTCTTGAAAGTCAGCGACTCGAA…
CLocus_3148	1	369	46.19	43.01	203	2355	TGCAGAACCCTCAGCAGCCCTAATTCCCGCGGCTATGCATGCATTGGGATTGGTTCAGACTACAAAACCCCCCCACAAATGTCTACATTTGGTTTCTCTTTGATGATACCCATCATATTATAGTGACGGCGATGTTGTCGAGCCTGTTATTCTAGCAGAGATAAGGTATCTCAGCCAGTCCTGACTCTCCTCTATTCTCACCCATTAATTTCAGAGGTAGTCCGTTACCTCATAGGGCTGGTATGTGGCGATAAGACTCCAGGAATGTAGCCCATTAGGACCATGGAAGAACATATTTCAGTATCCACCCTGGACCGCTTGAAGCAGCCTGGTCACTAACACTTTCCTCACATGGAAATTTCGTGATGGATGAATTCAAATCATGTTCATGCATTTCAA…
CLocus_41613	1	370	46.19	43.86	23	27623	TGCAGGTGTGAGTGATTTCCTGTTTTCCCACCGTTTGACCTCTGTTTCCCCCTCCTTCTCTCTTTCTCTCACACCCCTCAGCTAAGCCCTCACCTCTTCTCCTCTCCTCCCTCACCTCCTAACCCCTAAGGTGAGAGATGAAAGCTTCCAGTCTCTCTCCTCTTCTCACCATGCACTGACCCATCTTGACCTTTCGACCTTGCCTCGTTACCGCCCTGCTCATATCTTTCTTACCTCTGCCCTTCACCTTTCATTAAAGAAACCCCTAGAAGGTGTGTGTGAGAGAGCTTTTTCATATTGGCAGTTGTTGATGAGAGAAAAAGAAAGAGAGAGTGGAGAGAGGGAGTCTGAAAAGCAGTTAAATTATAACGGTGTAGTATTTCTTTTTTACTTTAATCT…
CLocus_20273	1	371	46.19	43.86	105	13977	TGCAGTCTCCTCCAGGGTGAAAACATTTTCAGGGATGAAAATGTCATCCTGAAAACAAAACTGTTGTTAAGACAACTGAACCCACATTTTTCAGTTGGCATTAAAAAGCTACCTGTCTTGTATGCTTTGTCAACACACACACAGAAAATACAGGGACATTTATTTTTCAGAAAACATCTATGTCAACTTCAGTCTAACTGAATGAGGTGGAGCTAACAAAACATAACAAAAACAAATCTGTCAACAAAATGTATGACAGTGCTTGACTATCTGAGGTGGAAGCCACAGCTGAAGTTGGAAGTCTACATACACCTTAGCCAATTACATTTAACCTTTTGTCAATATGGGGGCGCTGTTTCCACTTTGTAAAAAATCGTTCCCAAATTAAACTGCCTCGTA…
CLocus_18040	1	372	46.19	43.86	89	12423	TGCAGCCCTTACAGGTTAAAAACTCCACTGTATTGGGATCTGTGAAGCCTTTACAAAATGTCATGACCTTCCTCGCAGTCTATATCACAAAGGCAAGGTTTCTATAGCGCGCTGGAGACTTTTATCATTTGGAACTAAAGGGGTGAGATGGATGCCAAGGAGAGGGCTATGTTTTCTTACCACATATTTACCATGGAAGAAAATATCAGCAACAAACTCACTGCTTTATTTATGTGTATCAGGAGAGCTCTGTTGGCCTCTTACCAGTAGTTGTTGCTGAGTTGCTTCCAACCCCGAGACCGCCAATAGTTGGTGTAGGTGAAACATGCTTTCAGAGTAAATGTTTGGGAGGTGCATTTAATGAAATACTCACAACACAGCACAGAAATTAGTAGAAAT…
CLocus_8536	1	373	46.19	43.86	24	5769	TGCAGCATGGGCTTGGGGATCAGCGTGTCAAACACCAGGCAGTCCACACTCTCACTGCTCACACCTAGAGAGGGAGAGAGAGGGAGAGAGAGAGGAAAATGCTTACACAGAGAAACCAATGTACACAATACACACCAGGATTGTAGGGAGAGATACACACATTTAGAGAAACACCACGCACTCCTACCTTTGAGCCTGATGTTGATGGTGTCGCTGTCTCCGACCAGGTAGCCGCAGGGCAGCAGCTCGGGGGTGTGAGCGGCGCTGGTGTTGCTATGACGATGCACATCCCCGATGTAGTATCCCTCCACACTGTCACAGGTCAGCCCCAGCTGGCTCACTGGGTCCACATGGGTGATGTACTCCTACAGAAGCACGAGGGCAAAGGTCAAGGGTTAG…
CLocus_70797	1	374	46.19	43.86	107	44516	TGCAGTCTTACTTAGCTTTACTAACCCGACTAACCCGACAAAGAAACAACATCAATGGGGTTCCACTCTTTCATACAGGAGCCCTTTTCGGTCTCACACACCCGTCCGCTTCTCTCCCCCACACATACACTCTCTATCTTAATAGTGTCATGCCTCCATCCATTTCCCGCTGTCAGTTATCCACCTTAAACCCCTCCCTCCTTCTCCCTCGCTCCTTCTTTCTCTCCTTCTTTCTCTCTCTCTCTCTCTCTCTCCCAGAAAGAGGTCAAACTGCTTCCCTGTTATCTATTTCCAAGGTCACAAGGACACAAATCCAACCATTTTGTAATTTGACCCAATGTAAGGACATCTCCCAATGATGCGGTAGAAATGGTATGTGTGTGTGTGTTTGTGTGCCTG…
CLocus_145713	1	375	46.19	44.14	77	72254	TGCAGATTGAGATTATATGTGTGTGACTGAATATATAGACTCGTTTTCTTTAATAGGTTCTCCGCATTTTTATATTCTTTTTATTAGGGTTGGGAATTGCCAGGGACCTCACGAAACGATATTATCACGACACTTAGGTACCGATTATGAATTGCAATTTTCACAATTCTATATGTATTGCGATTTGATGTTCCATATATATTGCTCACAAGGCTACGCAGCCGGGGCAGGCAGCGTAGCCTAGTGGTTAGAGCGTTGGACTAGTAACTGAAAGGTTGCAAGATCGAATCCCCGAGCTGACAAGGTACAAAATCTGTCATTTCTGCCCCTGAACAAGGCAGTTAACCCACTGTTCCTAGGCCGTCATTGAAAATAAGAATTTGTTCTTAACTGACCTGC
CLocus_80546	1	376	46.19	44.14	16	49502	TGCAGTCCCCCATTGGAATTAAAACAATTTCTAATAACTTATTTATATCAAACCCAAATGAGTGAGAGAGAGATACCATACAGCTACCCTGACCACTGTTTATTGAAACACTCGAAGCACTCTCCCTGATAGCACTCAAAGGCAAAGGGGGAAAAAAAGGAGTCATGGGTAACTGCAACTCAACATGGCTGCCAGAACATTGGTGTGTCAACATAAATGGGCGTATCAAGTGGGTGTATGGAAAGCGAACAGCTAATTGGGCAGATTTGTTGCCACTCAAGACCGTTTGGTGTGGCTGCAACTGTAAGGACCTTTTAGCGAAGCCTAAACCTAATCCTTCTCCAAACCTTAACCTCATTCTGCTAACCTGCTACCTTAATTCTCCTAACCTGCTATGTT…
CLocus_58152	1	377	46.19	44.14	297	37785	TGCAGTGTTTCTCGCATTGTGGTTGAAATGAATATTAGCATTTCTCTTTTTAAAGATTATTTACGTGATTATTTCTCTCTGCCCTTGTCTCTCTCTTTAGGTGTGTCTTCAGTTTATGTTCAGCGTTGCTGTGCTGGGCAGTTTGGGAGCGATAGCTGACTTGAGCTCAGAATCCTGGCTGCTAAAAGGGGTTCTGCTGGCCTGTGTGATGGCTGTGGTCAACCTGGCCCAACGGTGAGAAAGCACATTGGCCGCCCGTGGTCAATCCAGTAGACGAGAGCACACGCCATCACAGCGGTTAGGGTTGATCAGCTGTTATGAGTGTTCTTCAACTGCGACGCATTGAGAGATCCGCGGAGCACCCCATGTCTAGAGCTCTGTTGGTATTACTAGGGACCT…
CLocus_30487	1	378	46.19	44.14	310	20744	TGCAGTACCGGAGCCTTCCAAGACCCAGCCGGTCCGGCGCCGCCGCGCGTAACGGAAACCGGTCGTCGACCAGCAGCATCGAGGCGACTGTGCTTTCCGTTACCACTCACAGTAAAAGCAGAGACGTGGGAAACACTGGGAAAATGAATGGAAGTGGGACTGGGGTCTCGCTAGCCAATCAGACGGACCGAGAGAAGGGCGTGTCAGAGGGCGTGGACAACCTGAGGGGAGGGGCTTCCAACGTACCTCTCACAGGGAGACAGCAGGTTGCCTCACCCACACTGCGCAGGTGAACAGACTCACACACTCACACTCAGATGCAGAGATATAATGTCACTCACTCTTAAGTGTGGTTATTAATGACACCCATTTACAGTACAGTGTCTGAAACCTTAACAA…
CLocus_43396	1	379	46.19	44.71	32	28883	TGCAGCTGCGTGTGTAAAGTGGTTTGGAAATGTTACTATTTACTGTAGGAAGAGGAGGAGAAAACTCCCCTCTCAGACAATAACTGGTACGGGTAAGTAGCTGTTCTTAGTAAACAGCACATTGGAGACCGGACAACAAAGAAGAAGGACATTGTGATCTCTGGTGGACAATCTGAGCATGTACAAGTGGCCCACAGGAAAGGCTCACCGAACCAAATTTCCGAGAGGGCTTGGTACCGACCGAGATAAACGACGAACGAATGGCATTCAACATGGGGCGGGGGTTCGTGTGCAAGGTATATGATTAATGTGAGGACAGTCCTAGAATGTATAAATGTCTCTCTATTTTCCCCACCCCCTTCTCCATCTTTGTGTAATAAGCCGTCATATCTTGTCAGT…
CLocus_47321	1	380	46.19	49.4	75	31230	TGCAGCACCACCCCAACATCAACATACATGAAAAGTACATGTTTCTAGGTTTTGTAGTAAAAAAAAAAGATAGAGGAAGATAAGTGTTTCCAATTAAATCATCGGAGTGCATTTTAACCATTTATGAGTAGGCATTTTCTAC
CLocus_28893	1	381	46.19	49.4	10	19638	TGCAGAAAGCTGCACACAAGCTCTGCTCCCTCCGAACAGGACTCTAGTGGATGCAACTCGCCATGGATTCCCCTACACACAATATGAACAGATTTGCAAGCTGACACACGTAAGCACCCACCTCAGTCCATGTGGATAACGATGGTGTTCTAAAGCAGTGTTACGTCTCTCTCACCTGCTCAGTGAAGTTGCAATGTGTAGTCCTCTCTGTATCCACAATTCAGAGAAGGCTAAACCTTTATACACATATCCCAAATCCTTGGGAACAGTAGGTGCGTGTTCCGTTAGATCCGAAGGGTGTATGAGAGACTCAAGTGTGGCTCGCAGGGCGAGAGGCGAACAACACACTCACGAACGAAACGCCCTCCACCGTACCAGCTTGTACCAGAGTGCGTACAG…
CLocus_7713	1	382	46.19	51.11	127	5209	TGCAGTCACGCAAACACTCATTCAGATAGAAGACCGCCGTGTTATGATTGTCACTACATAGTGTCATGTTAAACAATCACTTATAGGAGAGGAGAAGTTTGATTTGAGGATTGAATTGAGTCCCTCGTTGAAAGCTTTCGATTGTTTATTGGTAACAACGGTTGGACTCGTATGTTTCCGTCTAGTTTCCAATCGAAGCGTATCTATGCAAACACTGCATGTGAAATAAAAAAAGACTCATAGAGTTAGTCTTCACTCTGTAACTCCCAGGTCTCCTTCTGGTATGTAAATGATAACTAGCCAGGGCTGGGGAGAGAGAGCATATGAAGGCCATTCATTCTCATATGAGAGTTCTGGAGGTGACGGGCTGAGAAATAGCAAGCTGAGCGTCTCCCCTGT…
CLocus_72886	1	383	46.19	51.67	85	45789	TGCAGTATTAGACGTTTTTCCAGGTCCCCAGGACGTCGGGAGATGCCTTGTGCATGCATGCAATGTCAATATCATCCACTAGGCGCAACGCGAGTGCTTGTTACCATCGAGTAGACTCGCGTTAGGGTGTTGTAGATGGGGATAGAGGAAGGGCTTAAAACGTGAGCTACAACTCTGAGGATTGGGGGTTCAATCCCAGTTCTGGGTACTTGATTTTCGTAATTTTTTTTCTTCAGTTTGAACCCTTTCCCAAACCTTAACCCTTACCTCAACCACTCCGAATTAATGCCTAAACTTAACTGTCAAGTTTTTTATGTTTGAACCCTATCCCAAACCTTATTTAAATTGTTTTTATTTAACCTTTATTTAACTAGGCAAGTAAGTAAATTCTTATTTACA…
CLocus_36505	1	384	46.19	52.81	109	24497	TGCAGCTTTCTTTGGGATTGTGTTAATTTCGCTGTCATTCTGACATTAGTTACCGATGTCATGTTCACATTGGGCTTATGTCATACTTATGAAGATCTTAGGTAACTAAACTCTCATTCAGATGCTGGTGGTTGTTTCCATGTCTTTTCATCCAGATAATCAGATAATGCCTTTCTGGGCATGATGGAAGGATTGTAATATCCTCTTTAATCAAGGTCAGTATTGCCCAATGCCAGCCGAACAGGAAAGTGCTGACGGGGCGAGAGGAAGTACTTAACAGGCAGTTAACCTCCAGCAGGGCTTTGGGATAGATGAGTTTACCCCCCCTGGTGCCTACCCCGTCTCATACACCGTGAGGGGTACTTCTCGCCTCTTTCTCTGGTTAAAGTATTCACTGTT…
CLocus_20746	1	385	46.19	53.94	145	14273	TGCAGACCCCTTCCCTCAGCCAAAAATGTAATGAAATTGAGCACAAATCCTCCTAGGCCCTCCCTCTGCTCTCTCTCTCTCTCTCTGCTCTCTATCTCTCTCTGCTCCCTCTCTCTGCTCCTTCACTCTATCCTCTCTCTAGGTCAGCTCTCTCTCCGCTCCCTCCTGTCTTTATCTCTTCGTTTGGGTACTCATCCCATTCCAAAAGCAATCTGTACTTTTCCCCTGAGTCAGCACTTGTGCTGTCCATGAGCAGAGTCAAGCGGGCGGGGAAATTATAATTTGAAGAGCTGCTTTACCTCTCTCACTCTCTCGCTCTCTCTCTGATCCATACCACACAGAAAGTTAATTTCTTAGCGCTTTGGATTTTTTTGGGTCGTCGCCATCTCATATGAAGGC…
CLocus_27806	1	386	46.19	54.79	161	18821	TGCAGGATATGGGGTGGTTTTGTGTTACTTGGTTCGTCAAGGCAAGCGAGGCGAGGGGCCAGCAGTGCCCTTCTGACCTGGCATGTGGCGCACAAACGCAAAATCAATAGCAGAAAAAGGGTTTTAAATGTAAAAGTCATTGACATTTAAAGTTTTCCTTCATTAGGCTCTGCGTAAGGCAGGGGAGTCATTATCAGGAGAGATTTCTGGTGTAGGAGGAGCTATCATTGATCTTGTTGAAGTTGTTCTGCTGAAGTCGGCCAATGATTGCGGACCTGAGGTGACCGCACATAATGTGTTATTTCAGTGCTTAGTATTGTGCTCTCTGTCAAATGAGAGCTTCACAATGGGCTTTTATTAATACAGCGAGGAAAGAACTGTTCCCTGAAGAACTCCCGT…
CLocus_33530	1	387	46.19	54.79	17	22703	TGCAGATTGGCAGTGTTTCTGGTCTGGTAGGTGAGGTTATCTTCTTCATCTAGTTTTGAAGTTGAGAGCTTTAGAGTTTCTGACCATTTCAACGTGTGGATCACGGTCTCACATCTTTTGGTCTAAAGGTATTATTCTACGTTCAGCTCCCAACCACTTTACACGCCAGTAGCCACCCGGCAATGTTTTGGTCTGGTGTGAATTTCGTTACCTAGTCATTTAAGGAGTGGTCGGAAAGGGGCGGTTCCATCACCCTTACAATCTTTTCTGAACTAAATCGGGGCGTGGCTTGTTACTGTGTAAGGTATTCTCAGAAACAATTATCTTATTAGAAAACTAAAATCACATTCCTATCTTAACAACAATAGTTTCATAATTTCAGACTTTATACCTGTAGTG…
CLocus_20694	1	388	46.19	54.79	189	14233	TGCAGTACTGCTTGTCCATGTGCTAGCTAACAGCAACAAGCCCAGACTAGCTAAACGTTGTGTCAGCATCCAGCAGAAATCAGCTTGGTGGTTACATAGTAACGGCATCACCAGCCGGGTTGTAAAACTGGGCTGCGCTGGCCCGGGTTTCCCTGAACACAATTCCATTCAAGCCAGCTCGAATTTGGCCCTAATTTTAAGTGCCAGTGGAATCGGGTCTTAAATGTTGTGAATAAAATCAATGTATTTTTTGCAAATAGTACTTGCTAGTAACGTTAGCTAGGCTAGGCTAAACGCAATAGCTCATTGTATTTTAAGCTGTTCCAATACTAAATGACAGTCAGTATATTACTGCTTTCGGTTGGCATTACCATAGCCATTTTTTACTATTTGTACAAT…
CLocus_52251	1	389	46.19	55.07	81	34218	TGCAGGGAACTAGAGTGGAGACCATAAAAACATAGACACTAGTAGGACAGAAATGTCTTACTATTAGTTAAATATTAATTCATAACCATTAATATAGAATAAATCAGGTAAATACAGAAATGTTCTATCACAGTAGGAAGGTGAAAATGGCGTAAGAAAATGCACTTAGCAGCCGTCAAGTCTTCCTCTGAACCCCACATGTGGATGCCAAGTAATTTTTATGGAGCGGACCTCTGGTCCTCATGGGGTGTCCATCAATGTGCATGTTGAAAAACAGTGTGTTTGCGTGTGTGTGTGTGTCTGGTTATGTGTGTTTATGCTGTATGTGTGTGCTCATTAAATTGTAGGGCACAGCTTCTCATAGAATGCCTTTGGGCTAAAGCTCTGTTGGGAGTGTGT…
CLocus_39578	1	390	46.19	55.07	94	26395	TGCAGGATGACACTCAAAAAAAATGACACTCCACAAAAATAGTTAATAAACGGACACAACCTTTAAATAAATGGGGTACCCCTTAGAACTATTTAGATCTCTGAAATGTAAGAAGTGTTACTACTTTTCAGTGCTGCGTCCCTCAACACTACAAGACTAGATGAACAAGAGCAAGTGAGGTCCCTGCACTCTCTCTATGTGTGTCTTCTGTAGCGGGAGTTCCAATGCAGGTGAGAACGGTCCGTATTCAGTGTAGTGGTGAGAAATGGAGGGCTAGCTGATTTACCTAACTCATTAGAGACCAAAGGAATTTCCAGACTTAGCCATCCCTGAAAACGGGTGTGGTAACTCATATGTCGAAAGTTTAGTAATGATGTTAGGTACTGTCAGGGAAATTCT…
CLocus_53243	1	391	46.19	55.35	150	34865	TGCAGCACCGCTGGAACACGCAGCGACTAAAAACAATAAAAAATGTCACAATTGTTTGTGTCAAGAAACTTGAATGCATTTGGTTTACTCTTTTCAAACGAGGGAATACTAATTACATACCTGGATCATCCGGTGCGTCTTGCATGTCCTTGTCCCCCTCCACCTCCGTCACTACTCCACTCAGGAAGGATACCCTTATAATTCCGGCAAGTCGCTCATCAAGAGGGTTGAGCTCCGTTGTCCCCTTTCCCCACCCATAGTACAAACACTTTGTCTGTGTAAGGCTATGCGCCTTTTGGCTGCCACTTTTATGTCGGACCACTTATTTTTTTATTCCTGAGAAAGTCTGTCCTTCTGAGCCAGCAGCATTCACAGCGTCCGCCACATGCTGCCACTCTA…
CLocus_77671	1	392	46.19	55.35	228	48231	TGCAGCAGAGATATGGTGAGAAATATGTTCGGAACATCAAATCGCAATATCGAATGGCAATACATTCAGAATCATGACAACTGCAATAGATATCGTATCGGCACCTAAGTACTGTGATAATATCATATTGTGAGGTCCCTGGCAATTCTCAGCCCTAGAAAATAGTCGAACTTACGATTAGGGGAAACAACTTCTATCTTATTCCCAGAATGTGCTGACAGTTGGGTGTCTTAGGATGCCACCAGACAAAGATGACAGTCATCTAAGGAGACTTGGATTATCTTATCCACCCACCCACAGAAGGGGAGACAGCAGTGTGGGAGGTTAGAGGACCCTCATCCTGTTCCACTGAAACGAACTAGCCTTCCTAGATCAAACGCAGTGATCGTCTTTGGATCA…
CLocus_20111	1	393	46.19	55.91	77	13873	TGCAGTGTCCTCTGGGTAGGGAAGAGAGGACACTGGGTTCACCCACCACACAAGCAGAAAGACATCCCAACACAGGGAAAAGAGAGAGAGTCTGTCCTTACCTTTCTGAGACGCAATTGATACATTTCCTACAGTTAAAGTCTCAGATCTGAATTTTTTTGCGAGTGTACCCGCCAAAACCTCGCCAGCATAACCAAAGGAGAAGAACAAGCACACATGTACATTTGCTTGAGTCCAACTACAGATGAAAACACAAGTTTACTACACAACTGAGATGGACCTAATGTTGCATATCCATTGGTGTCTGGGTTGATCTGTTAGAGTATTGTATTGGAGCGCCACTTGGTGGTAAGCCCCAGCAACAGCAGCATTGTAAGTATTCAAACACAGTCATACAGA…
CLocus_75344	1	394	46.19	55.91	119	47059	TGCAGTAAAAGGTTTTAAGACAGGCCACACAACAACCACAAAGCAATGGGGACTGGGGAAACTTCAACTGGGACACATTTCAAAGTATTACAGTACAGTTCACATTTTCAAATATTTCGGCCAATGGCTATTTTTTATCCTATTTTCTTGCCAAGGTAATGATAGAATAAAATTGGAATGTGAAGTTTTATTTACCCTGTACCTATTTCTTTAACTTTAATTCCACCTTGATTTCTGCTCTTATTATTTCATTCCCTCTTGAATAAAACAGGATGATTTTGCTCAGTTTTGCATCAGTTCAGTGTCGGACACTCTGATTGGTTCATGATGTGGGTAGTTGTGGAGTGTCAGGTGGGTGCGACATAGTCCACTGACATCCACGCAAGAAAGAGAGAGGAC…
CLocus_51288	1	395	46.19	55.91	54	33601	TGCAGAAGAGCATCAGAGGAGCGGCTGGCTTCACACTGGCCCCCAGTGGAGGGTCCAGCCAACATCCCCGTCCCCTCACACAGTTCTTCCAGATCTAGCAAAAGGGAGAGACTCACTTGAACACATTTCAAAAACGGGAAGATAATGACTGCCTACTCTACTAACAGTACTGTGTACAATCGCATCTCTGCCCAACATACAATTCTCCCAACCTCCTTTGTGTGAACCATGCCAGTATCGTCACCCCATGCAAATTTCCAGTCACAATGAAGCACTAATGGGTTGCACCAACTCAAATAATACCAGATAAATGAAAACAGCACTGCAGTTTCACTCTGTTTATATGAACAGCTTAAAGCCTTTGTTGGTTTTAAACAGGTTCAAGTTGTTCTTTAAAAC…
CLocus_98586	1	396	46.19	55.91	89	57763	TGCAGGGAGAGAGGAGAAAAGGGAGAAGAGAGGAGGATTAGGAGAGAGAATATAATCAAGGAGGAGAGGAGGGGAGATGAGGTGGAGGAGGAGGACAGAAGAGAGAGAATGGGTGAGATGAGGGGGAGACGAGGAAGGGAAGGAGGAGGTGGAAGAAAGAGGATGATCAAAACCCGGAAGAGGATTAAGAGATAAAAATAGAGAGGATCAGGAGGGTAAGATGATGAGGGTAAGCGGCGAAGGAAGGAAAGGGGAGAAGAGGAGAAAGAAGAAGGAGGAGGAGCATTTTTAGGATATTATTAGGGATGTAGCGATTCCACTACCTCTTACAGTCTCACGTCAGAATTTAACGTTCATCCATGTTTCTCAAACGACAAAATTCGAAGTTGTTGCAAACTT…
CLocus_4265	1	397	46.19	56.19	92	3083	TGCAGCTCAGCTGGTGCTAATGGACCTGTGCCTGTGATAAAGACTGAGGCTGATGAACACTCTGAACTCTACCCATAACACCCCCTGACTGTCAGCGAGTAGGTGAGGAGGAGATGGAGGGATGGAGGGAAGGATAGTGTACAGGAACAGATGTCTGGCATCTGTCTGTGTAGAGATAATGGGCTGTTTCCACCTGGCTGAGGACCATTCCGACAGTACAGTATGTTACTTCGCTAGTAAATCTCCCATCATGTTACATTATATGCTCCAGCTTCATCATGAGTGCATCTCAGAACAGTAAATAGAAAGGTTAAGTTTCAGGAGAAACTTTGTTATGTGGTCCTGTGTGGCTCAGTTGGTAGAACACGGCGCTTGCAACGCCCAGGGTTGTGGGTTCAA…
CLocus_63233	1	398	46.19	56.19	9	40716	TGCAGTCGCAAGTTCATGACCTGTGATCATTTGGTTGTTGTAATGGTCATGCAGTCGACATGTAGTTGCAAGTTGGACAATTGTATACCCATAATGCACCACACTTTGAAAGGCGGTGACCAACGTTCGTCAACGTCTGTGTGTTGACAAAACTGATCCACTCGAACGCGCCCAATGTCTTCCATTGAGCTATTTCAGTGTGTTCGACAGGTCATTACAAACATTTTCGGAGTCTTAATGTTAACATGAAAAAAATTACAGGCACAAGCAAGAGTATGAAAGGGTCCCAGGAGTAAAATGAAAGCAATCAAGTGACAAGTGGATTTTGCACCACTCAAACGCAGAAAATAGATGGCTGAAAATGACATATCTTCAGGTGGGCTGGGCATGCGCGTTGCT…
CLocus_23698	1	399	46.19	56.76	147	16136	TGCAGATCTACTATGTGTACAGTAACAATGTAAATAGGCCTACAGTATACCTGCACTGTAATTATTATGTGTACCTATACTGTAATATTATAATTGCAATGTAAATACATTTTACATTGACCACTTTTTACACAGAAATGGCTCATTGATGAATAAGGGAAGTTATACCCAGATACAAAGACTTGCTGTAGATGTTTGATCACAGTTTATACACATTACTGTACACCTACCTCTATGCTAGTTTGTGCTATATATTTTAAAGGTTTTGCCACTTATGATATAAATAGGCATAGGATTACTTGTAGAAGATACTAGCAAGGCTACTCTGTGTAAAAAGTTGGAATATCTCTTCAGACAATGTATTGGTGAAGACATCTTGACCTAACTTTACAGAGAATG…
CLocus_72436	1	400	46.19	56.76	24	45530	TGCAGAATTCAACGTTCATCCACGTTCTCCAAACATCAAACTTTGAAGTATTTTTGTTGCTCCTGCTGCTCTGTGCCATTCCATTTTTCCAAACATCAAATTTAAAAGTTAATGGTTAAGTTCAGGCACTTATTCTGAATGGTTAAGGTAAGGGTTAAGGTTTGGGATAGGGTTAAAACAAAACAAAAATAAAAAACTGTGTCCACAACTGGGATTGAACACAACCTTCTGATCCAGAGTCATGGGATTATGCCTATCTGCCACCCACATCCACAACGCTTTAGCAAAACCCAAGCCTACTTGATGGTACTAGTGCCCACTGTTGTCCCTAATGGCTGGTTTTGAAGGCATTTGCCAACATCCTCAGGACATGGACAGAGGTCCAATTTTGACATCAAC…
CLocus_31484	1	401	46.19	57.04	228	21385	TGCAGGCCCTAGACCCCTTGCCAAAGGAGGCAGAGATCTTCATCGTTCTAGAAGGTTCTACGCTTGCCCATGTCATCAGAGCCCAGAACGATGTCATGCTCTGCTTCATCGTGCCTGGTGAGAGAAACGGTGTAGAGTGAAGTTGTCCCTAGACACTGATCTGTGTTCAGTTTAGCATTTCCCTACTAATGGTTAGGATTGGGGAGGAAAAACAAGAAACTTCACCCAAAAGTGAGAGAGGTGAGTGTGTGTGTTGTGTGTAACTGCCATCGTAAAGATGCCTATGACCTATGACCATCTCTATGACCTGTGTGTGTGCATGTGCCCAGACTTCTCTGTGAGTGAACCCTATGACCCGTGGGGATCAACCACAAAAAGTGCTTCCCAAATGGCACCCTA…
CLocus_8185	1	402	46.19	57.04	267	5513	TGCAGACACTACCTCTACCTATTGTCATAGAGACAACAGCATAATGACAGCAGAATGACAATGTTCCATGATAATAACATTCTAATATGCATTCTACCTAGGATTGGTACTTCGCCCAACAACATTGTCAATGTCATCGATAATCATAGATAAGCTGGAAACATACGGGTGCTGAGGAGCTAATATTAGAGAGCTGACTGGAGGTTCTGAGATGTGTTCTTGACCAAGGGTTTGACCTTTGATCTTGGGAGGACAGGTCCCCCATGATATGTAAAGAGCAGAGGAAGTAGAACACAGTTCAAGGAGAACCTTCGGACAGATCATTACAGATCCATGTGCAAGGGCAGACACAGAGGAGAGAAAGAGATGGAGATGAAAAGAGAGTGGGGTGAAGAAGGG…
CLocus_26419	1	403	46.19	57.04	76	17911	TGCAGAAGCACGCATGCACGCAAGTCATCGCTCACTCTTCACAGACATAGCATCGGGGACAAGGATGAGTGTGTGTGCGCATGTTTCTTTGTGTTGGTTGGATGTGTTTCAATTAAAAATATATATATTTATCCTTTATTTCAGTGGTACTCATTTCTTTGGACACTTTCTCACTCCAACTTATCAAACCCCTCAAGAATTTAAGCACAAATAAGCTAAGCACAAAGAAGAATGATGAAATCCATAACAAATGCAAGCTCTCATTTGTTGTGTAGGCAACTTTTTGTGGTGCGTGCATATGTATTCACCCCCTTTGCCATGAAGCCCCTAAATAAGATCTGGTGCAATTACCTTCAGAAGTCACATAATTAGTTAAATAAAGTTTACCTGTGGGCAATC…
CLocus_1719	1	404	46.19	57.04	52	1476	TGCAGCAGATGGGAGAGTCAGTTCTTGTACTCAAGTACAAAAAAAGTAGCCCTTTCGAAAACTACTTGAGTGAAAGTTAAAAAAGCAACTGGTCAAAGTACTTAGTACTAGTTATTCATTTGAACATCTCACTTACATACATAACAAGGAATTGTTGATGGAGGGTTGAGGGGCAGCTATTGGGGAACTGTGGGGGGATATTGGAGGGTTCAGGTTCCCGTTTTTGGCCTTGTGGGAGATCTGTCGACATGCCCTTGAGGATGACATTGACCCTGGATACTTCTGTGTGTCGCTCTGAATGTGAGTCTGTTGGATGACTGGTGTGGTGTAGTTGTTTAGGGGCTTCACTGCAAGTATACTGTATGTTATGGATTCAATAAAAAAAAAAATATATATATA…
CLocus_5729	1	405	46.19	57.04	187	3989	TGCAGTATTGAACTGCAAGAGATGCAAATTCATTTATTAGAACAACATGTAAAAGTATTGCAAACAATCAGGGATGGACAGAGACCAGAAATCGGCTCTTTTTTTACGAAGCATTGTCATCCAAGTATACAACTGTATGTACAATGCTATTTATGCGCTAAGACAACAGAACATACAACACTTCCACACTAAATGGGTACAACAAAAACAGCATGAAAAGAAAAGGAAAGAAAAAAGTCCTGAGACAAGACAAACAAACATTTTAAAAATGTGTTACCCCTGAACCCCCTCAAGATCAAATCAAATCAAATGTATTGGTCACATACACATGGTTAGCAGATGTTAATGCGAGTGTAGCGAAATGTTCCTCTGCTGGTCAGGTCCAATCTCCTGATGAGT…
CLocus_109583	1	406	46.19	57.89	133	62312	TGCAGTGTATCAAATACTTAGATCCCCACTGTATATAAGCTATGTTGATATACACGTGGGCCTATGTATTTTAGTATATAGCCTAGCCTATAGGCCTATAATAAACTATGATATGAATTGTGATGTTCAGCCCAAATGCAATATTCTCACCACTTTTGATGATTATTTTCTCATTACTCATAAGACATCCACTAAGTACTAAAGTTGATCAGCCCAATTCACTGCTCATAACTAATATATCAACATGTGCCTAGGCCTCTGATCAAAAGTAGTGCACTTTCAAGGGAATATGGTGGCATTTGGAACAAAATTATGCTGCACCTTTATCCATTGAACTAACATTGTTCCAGTAGAAAGACAAAAGGTCACTCTTGTTTACTTCTAAGTCTCAGATTGGCA…
CLocus_17788	1	407	46.19	58.17	92	12231	TGCAGGAATCCGTCTGCAGAAGCGCTGTTTGTATTAAGACCTAGCAAAGTACAATTAGAAATGCACATTGAACGTCACAGAGAAATAATAACATTTTCCATAGTTTATGCACGGTGCCATAATGTTTTAAGAAACATTGATACTGGTAACCTACAAGGATGCCTGCATATTATCAATTTGAATATATTCATTAGTTTCTGTCTCTAACCTATACCTTTAGTGCGTCAAAAACGTCATAAATATTTTGACATTTATTTTAATATTTTTTTATTTAGAATGGGCATAGTCTAGGCCTATAACATAAAAAACATTTTAATTACGTGGATGTATGCTGGATTTCTAAGACACTATAATAAAACCAAACACATTTTTATCAACCTATTTGTCTTATTTATACGT…
CLocus_36481	1	408	46.19	58.17	14	24473	TGCAGATGGCTTTACAGGTTTTATTATCTACCATTACAGCACTACTATTACAGCGCTAGAAACCTAAATCCATAAACCTGTACTGACCCGTTTTGGACTTCAGTGCACCGGGTTGTATCAGCAAGATCAGAGACAACAACAGAGAGTTGAGAGAGCATGCAGAGAGTCCAGAGAAAAATACAAGAAGGACAGAGATTACACCAGCTGCATGCCTTGCAGGAGCCAGATGTACCGGTCACCTCCACACACTCCAGAATCATAATCAGCCAATGATTGGGCAGGAGAGACACACATACACACAAACACACACGTACACACAGGATGATATCCACACAGCTCTAGCACATACTGTAAACCGTAGGGTGAGAGAGGAGGGTAATGGATGGTTGGTGGGCGCAT…
CLocus_39033	1	409	46.19	58.17	8	26091	TGCAGCCCAAACAGGTTAATAAATAAGTGTTTGGTTATCCTGACCTGGACACCATGTACAGTATTATAAGAGCCCATTATAAGCTATTATCAGGACAATATACCTTTACCAACACCTCTCTGTATTTTTTTACTTTGTGGATGGGGGCTCCCGCAGTGCAAAATGCATTGCTACAGATGCTGGTTCGATACCCGTGCCAGTCGCCACCGGGAGACCCATGAGGTGGCTTTTGGTTATAATTTAGAATCCTCCAATCCTCTATATGTAATTATTGGCGGAGAGTCACGTCATGTTTTTCGATATACTGTAGGCCTACCATAGGCGACATGAGTCTCACTAGTGTTGAGTAATGTGCTGTTAAAAGTGGTGTAGGTCTTATTTATTTAAAGAGCATATTGA…
CLocus_5079	1	410	46.19	58.17	144	3592	TGCAGATACGCTGGTCCTGACTTGCCAGGGTATCTGAAAGAACGATATAGATCATGGATCACACTCAGTTTAGGGGAAGTCCTGAAAATTGCAACATAATATTGGATGGTTCCTCAACCTGAAATTAGTCGTATTGGCCAGGAGAAAATGTAATCTATGGTAATAAAGTCAGCTGAAGTTTGTAATGGCTATTTAAAAGAAAACCGAACAACGGACTACAGTTTCTCCTGGCCCACAGACAAAAAAAAAAACGCTACAAAGTGTTCTGAAATGGGAATGGTTAAGTCCATGATGAATGTGTAGGGATGATTGATGTCTTACCTTGGAGTTTGTAGATCTTCTGAACTCTCAGCTCAGTGTTCCGTCTGACCTCAGTCTCAACACTTCTCTCTTCCTCCT…
CLocus_38080	1	411	46.19	58.17	78	25430	TGCAGAGAACAACTCTGAGACCCTTGAGTGAGGGATAAAACACAATCAGAAATGACTGAAATTATGCATTTGAAGAACGAGCTATACATTTGTCTGTATAGGGTAAAATCTTAATTCCCTGATGTGATATATAAAATGTTTGTCAAATTACAGGCAATTGTTATTCATCCGAGTCCTCTAAAAGTGTTACACATATAATCCATCCTCTGCTTGACTCACAAATTCCATTTAATCAACATCAACATTTCAGAATTTACACATAATATCATGGCAGGATTGAAATTATTCGTTTTTGAAACAATTATTTTACATAGATGCAACGGTCTGACATCAAAGACAAATGGGTAAATTTAATTTCATAATGCTGTTAGATTAGAAATTGCTCCAGCTTACAGTATA…
CLocus_75630	1	412	46.19	58.17	176	47254	TGCAGCATTAGATTTGTATCTTAGGCCTGCTAGCTTGTTAGTTACATGGCAACACACCACTAGTTTCCGTCTAGATTGCATTGTACTCTAACGCTTTATATCGTCTTCCTGAGGAGAACTTCTCCAGGCTTTCAAAAGTTATGTGCCATTTTACCATACTGGGACTGGGGCATTTCCCCCCATCTGTCATATTAAAACTTTGGCATAAATGGAGCATTTCTGGGTTGTCAAATCATTGCATGTTAGAACAAATTGTCTGTTTTCTCTCTCTCTCTCTCTCTCTCTCTGAGATTATGATATGGTTGTGGCTGTGTGTGTATTCAGATTAACCAGTGGTCTCATTGTGTCTGACCCTGTCTCTCTAGCTGCCTGCTTTTTCTAATAACATTTTGACATTCC…
CLocus_38943	1	413	46.19	58.17	214	26026	TGCAGTGAATGTGTTATTGTAGCAATTCCATTGATGCCTTTTTGTTTTGGTACAAACGTGTTTGTGTGTGTGCGCTCGCTCACCGTCCTCAGCTGAAGAAGAAAGAGCTGGGCCACATGCAGGCGCTGGCCGAGGAATGGAAAAAAAAATCCCTCGGGAGCGCGAGTCTCTGGTCAGAAAAAAGGTGCACTGTAATGTATAATTCTAGGAGTAAATTGACGTTGCCTCTAGATGCTGATCCTGGGTCAGTTTTGCATTTCCCCCCCAGTAATGGTTAAGGTTTTGATTGGGCAAGGGGAAGATGATCCTAGATCTGTACCTAGGGGAAACTTCACTCCGGAGCATTATACTACTTTTCTTATGATCGTTGTGTGACAGATGGCCCTTATGTGATGTGTT…
CLocus_57511	1	414	46.19	59.01	230	37392	TGCAGTACGAGCTGGGGAAAGTGTTGTGTGATGTCAGTTCCTGTGACAGCTATGTTGTTGCTGGGTAAGATATAACATAACCTGTTTTTAGTAGGGATGGGCACGGTTAATCAAATATCTGGATATCCGATTTGGACGTTAGTATTCCAACACTTTTTTTAATGCTTATTTTAACAATGGAAAAGCTTTGTCTGAATTAAATAGTCCATGTTAAGTTGTTACACACAATGATATATTATGACATTTAAAATGCATAATTTGATAAAATAACCAACTTTAGAATGTAGTGTTTATGTATGGCACATTGAGCTACTGCTGCTTCAGATGGTACATGGCTTTGACAGAACATTGTTTACAGTTGCACACTAAATGTAGATTACAGTTCAGAGGACATACAAT…
CLocus_63052	1	415	46.19	59.01	114	40676	TGCAGAAATAATCTGATAGGTATGGTCATTACTGCACCTCGACTTCTAAATAAGCTAGGTCGAGTTTGACATATTGCTAATACTAACTATGAGAGAAACAACAGAACAGTGGCCGAGTGCCTCTGACCAGAATATCGTCCGCCAAATTCTGTTCATTTTCCAACAAATCCTACATGCAGGGGATTGGGGGCTAGAGGTAGATTTGAATTCAGTGTGTGATACTGCTATACTAAAGCCCTGTCAATAATCATCAGCATGCCTGTTGTTAAAGATATTTAAGGGACACCATGACATTTAACCCAATTTGTAAGTCGCTCTGGATAAGAGCGTCTGCTAAATGACTTAAATGTAAAATGTTAAATGTAATCACTTTAGATTAGATACACAATGTCGACAAGT…
CLocus_91064	1	416	46.19	59.3	37	54721	TGCAGTCAGATTTAAAAAGGTGAGTTCTGTCAAAATGACTTACTAGTAAATAGTGCAAGTTGAAATTATTCAGAACTTTTCAAACACTTTAACCTCTTCTGCGTTGTTGACCATATTTCATCAACATTCCCAATCTCAAAACTGAATATCCTTTGCATTATTTTTTCAATCAGTGCACCGTGCTGTGAATGTTCTAAATGTGTTTATAATGTTTTGCAGGGACAGCTGGAAGCGAAACCAGGCCACTAAGCATGTATTTGCCTGGATCCTCATGCAGGTGGGCCGGCCGTGGCTAACCGACTATCTGGAGAAGGTTTTCCCCCCTTCACTGCTGATGTCGGATGATTACTGCACTGACAACCAAGTGCTGGGAGTACGCTGCCTGAATCACATTGTCCT…
CLocus_23489	1	417	46.19	59.3	143	16035	TGCAGTGGAGTGACCAGTGATGCTTAGGCTACGTTTTGCAGCTGTGTGGATTCAAGTGATTCAAGTGTCTCTTTTTTCAGATTGAATTAGGCCAATGCTTTTCTTCGTAATACAGGTGGACCCGCACAATGGAACCATGGCGGGTCACAGAATAATGTGAACACACGTCGCAGGGCAGATACATCTTCTACTCGCCATCACATCAGGCCATCTTGTCCTGATCAAGAATGCAATCCGTCAACGGTGAGTGCTGTAGTGTGTGTGTGAGAGAGAGATAAGAAAGAAGGGATCTGAGACTGTTATCACTGCGTAGTCAAATTAATTCTTAAATAATATAATATGTTTCTAAACACTTCTACATAAATGTGGATACTACCATGATTACTGGTAGTCCTGAAT…
CLocus_4082	1	418	46.19	59.58	193	2951	TGCAGCCTACTGTGCTCCGTGGGCCCTAAATGTCCCTCTGGGCTGGGCAGCCCGGGGCAGGCTCCAGCTCCAGGGGTTATTGATTAGATAAAGACACAGGCTGGTTTTACATGGTCCCCCTGCTGCGATGTGACATGACAGTTATCGTTGGTCAATAGAGATCCTCACCTATACACACAACAGTCAGTCACTATTTTCTCTGGTGCTTCTCTCCCTCCTTGTGAAGATGGGTTATTAGTACTCACCACAGCCAGAGATGGGTCTGTTCTCCTGTAGTGCCGTCTTTGGGCTAGCTGAGGCTTGTTTGGGAAGAGGTAGTATGTTCAGGATGAAGTAGAGATTTTGTTTTTTTAAGTAAAAAAAAATATATTTAATATCCGAAACATACAATATACTTGC…
CLocus_34011	1	419	46.19	60.14	24	22953	TGCAGTACATTCCATACTACGTGGCCTTTGGCTTCATTTCACCACAACTGCGGTCAAACGATGGACCACTGCCTAGGTCAAAACTAATTTAAGAACTGAAGTTTACATACTGTATAGGCCAAGAGAGACTATGTAAATCAATGACGGGTGTTACACTTTAATTTACATTCTACTACTTCTTACCTGATATTTACCTTAAAATAACCAAACAATACTCACAATAACTACAGTTTGTGTTATTTGTGTAACATTGAAACAAACATACTATTTACCATTCACTAGCAGGTAGGTAAAGTATGTTTAATTATGTATCAGTATCCTTACCACTCAAATAAGTGCGTAATGAGTATTAACAGGTAAATACCACTGAAAAATTACAGTACAATATTATCAACTCGT…
CLocus_42795	1	420	46.19	60.14	75	28497	TGCAGTAACAATGCTCCTGCACCTATCCCACAAGATACAGGTACAGTGTGCTAAAATGCCAAGCAAATGCCATGCCAACCTTAACATTTGTTATCACAGCCAAGATATTATTTTCATTAACCATCTGGACTATTTTCATGAATCTACACGTACAGGAGCTGATGGGTAGCACCTCCTGCAATACCAACTTTTTAGTTATGCTATTTTCAATGTGTCTGTATTTACAGTCCAAATATATAGAACCATTTTTGGTGTCACAGTTTGGTTTTTAGTTTGTCTTTTGCTAATAGCTGTGCCACAGCAGTGTGGTTGCACCCTCAGTGCCCTAACAGTGATGAGTGGCAAGCAGGTCATCCTGATTGGAATAAATGGTAAGTATTTGGTTTTTAAGGACTTCTA…
CLocus_30507	1	421	46.19	60.14	181	20749	TGCAGGTCGTTAGCACTTGGCAGCTAGTTTGGAAAGACTTTAGAAAGGCTGGCTTATTAACCTTTGACAAGTCATCGCCTTCTTATTGTCCTCCTCCTCTCTCACTGTCTCTTTCGGTGTCTCTCTCTTTCTCCTTTCCTCTCATCTCTCACGTGTAAATATCCCTGGCTGTGTGTTCTCAGCGTGGCACGTGGAGTCCTCCCTCTCTCTGTTTCTCAGTCTCTTTCTTTCTCTCTCTCTCTCTCTCTCTCTGTCTTTCCAGATGTAATTGCAATTTATGTCTGTAACCACAACACGGTTGGTCGGGGAGAGACAGGGAGAGAGAGAGAGAGAGAGAAAGAAGAGAGACTAAGACAGAGAGAGAATGTGGCTGGAGGCATACAGAGCTGCTCGCCTGCC…
CLocus_10636	1	422	46.19	61.56	242	7152	TGCAGGGCCTGTCAAAGACCCCCAGTCTCCTTTTTACCACGGATATGACCCCTACTATATTCAGAATTACATGCAGACCGGCCAGTCAAACACAGCTGCTTTTCATAAGACCGCCACCCTTCAGTAGACAGTAAATGCAAAACGCTGAGGACAATGAGGGGAGAAACACCCCGGAATTATTTGATTCGAAGAAGACTGATGTCATCAACTCAAGTTCGCAGTCCCAGCTTCAGATGGCGATGACACAAACACACACGGCTCTAGCCCAGTCCTTGTACTACGGCCAGTATGCACGAGGTCTTTACATGGATCAAAAACTCTTAATTGCATCCAAGTGCTGTGATCAGCAGCAAATCACCAAGCAGAGAGGAGGTCAAGCAAACCGAGAACCAGATGAGA…
CLocus_225	1	423	46.19	61.56	227	282	TGCAGTGTTAAATGGACCAAAACATGACATAGACTCATACCGCACGTACAGTACATAGAGTACTAAATACTAAATCCTTGTACATTAAGCCGAAGTGCGAGGTTCTCACATGCCTGGTGTGATTAATATTTGTATCTAGTCTCTGACAGCTCTCACCACTCTGTCTTGTATGGCAACTGAGCTTTTTGTTTTTGTATGAATGGCCTTCAGAGGGCAGTGTGCTGGGATAAGCAGATAAGCAGCGTTGAACGTAGGGAAAGTGAACACAGGTTACGTCCCAAATGGCATTCTATTCCCTATTTATTGCACTACTTTTGACCAGAGCCATACACAGTAGAGTGCTATTTGGGACCGAGCTAGAGACACTCCTGTCTGAAGTCCTGCCTGACTTTCTGTCTG…
CLocus_18636	1	424	46.19	61.56	100	12831	TGCAGCATGGTGACTAGAGCATGTCAAGCTTAGAGGCTGTAGATATAATACATGGATAAAATATGTACGGATCTGGTTGTGCTGTTGGTATTCAGCCAATGTATTAGCATAACCATTATAATGACGGTAATATTTTGTTTTCAGAGTTCCAAGGCGAAGGGTAACTTGAGCTGTTCTCAGTCATTTTCCCTCATCTCATGTTCCCATCTCAAGCCCCATGCACTCCCTTCTGCTAAATGCAGGTTTACCCATATACAGAATTGTTATGATAGATGTGAGCTACTATGGTAAATGTTCTTATTTTAATGCAGAACATGAGGTACTTCTAAAAAGGTTGTTTTTTTACTTTAATGTCTCCATTTTAGAACATTTCTCCATTATAGAATGTAAAATGATGTC…
CLocus_106839	1	425	46.19	61.56	84	61159	TGCAGGCTTTCTGGATCAGGTGACGTCATTGTTAACCCTGCATCAGGGTTGTATTCATCAGGACACGCAACTGAAGATGTTTTAAAGTGTTCTGCAACAGAAAACAAAAATGTGCATTTCTTATTGGACCATGTCAGGTGGTCCCTCCCTGTTTCAGTTTGTCTTTTTCCATTTGGTTCCTAATGAACACACTCCAGACTTATAGCTTCCAGAGAAGTGCTGACTGCTGATTTCGATCCACTGTCTAGATAGCGTGTCTCAGGGGCCGGATGTAATCTGTATCTAGAGGCTTTATGGAATGGAATAAATCTGTACCAAACACTGAAAATTAAAGATTAACAGCTAATATTTATTGATTTAAGATGCAGACAATGGCTGTAATAGATTGATTGGCAGTAA…
CLocus_28451	1	426	46.19	61.56	8	19347	TGCAGTCGCTATTGCCTGCCATAACTGGAATTTGACTCATAGTACTTGAGTGTTACCCAGGGTGCCAGTCTGTTTCTGCTTTTTTTGCCAGCTCCTTATGGAGTTGTCCATGACAACGGAGTAGGCAAAAGTACAAACAGATCTGGGACCAGGTTACTTGTGTGTGTTCTGTAGGAGATGGATCCGGGCGACGTGACTCTGGTGGGGCTGCTGGAGATGAGTGATGAGCAGGTGTGTGAGGCCATGGAGAGGTTCGGAGCCAACGACGAGGAGTGTGCCCGGCTCAACGCCTCTCTGTCCTGCCTCAGGAAAGCCCACCAGTCAGGTAGGAACCCGACACACACGAAGGGAGGGAGAGAGAGAGGGAGGGAGGGAG
CLocus_49084	1	427	46.19	62.12	175	32289	TGCAGACCGAGACAAACATCAACTACCATTACAATTCCATCTGTAGTCTCTTGTGACAGACGAAACACCAGCAGGCATGCAAGATTTGGTTCTAGGTGCCGAGATTACTAAACCCCCCGAAATCCTATTTGAATTTAAAGGTTAGGGCTTGTCAAAAAGCCACAAAAGCCAGGAAATTCAAATGAGCCAGATAGTGAGAGCAATAGAAGTTGATGCTGACCTTGGATACTGTGATGGGTTTCAGACAGGTCTGTCCGCCGCTGCTGAAGTTACACGTCACTTCGATTGTGTCAGCTGAGCAGCCGAGGTTTGGGTCGATCCAGTAAGTGCCTTAAGGGAGGGACAATAAACTGAGTGAAAAGGGATTTTGGATACAGGAGTAGTGTAATTTCACCAGAG…
CLocus_19920	1	428	46.19	62.12	168	13729	TGCAGTAATTTGCTTTGTGAACCCTTTTGACTGTCGTTATATCATTTCTCTTCAAATTCATTCATGACACCAAAACTTCCATGCTATGTGGAAACATAAGTATGCATAAGTATGATGGGAGTAACTCAAACTTGAAGATCCCTTAAATTATGTCTTGGTCTGTGGTGGACAGCTCCTCAACACATTGTTGATCGTTTCTGATTGTTCTCTTTGGACCAAGCTTGTGAGGTGCTCTTTGAAATGTTTCTCTTTCAACTAAGCAGTATCAGCAGAAAAACTTAGTACAGCTAAAGTGTTCTGTAAACCCACCAATACAGCGGGGTTGTCCCCAGCAAAGGTCGATCAATGACCCTTTAAAACTTCTTAAGGCTAGGGGGCACTATTTTCACATCCAGATGA…
CLocus_7659	1	429	46.19	62.12	82	5174	TGCAGATCACTTAGTCACTCCCTTAGGCTATGATCAGCTTAACTTCTATAAATCCTAACCCTTAACTATTCGGTGGAGAACCGCAAAACTGATCTTAGATCAGTGTCTCGAGGGAATACTCTGTTCACAGGGGTGTGTGGAGCTTATCAGTGTATGATGTAATCTTACTCCAGTACTTACTGAGAAAAGCATCTGATATTGCACTGTCTTTGAAGGGAGAGAGGGAGAGAGGGAGAGCTAAAGTATTTTTGAGCGCAATGATCATTCAGTAGTTTCTCACCTCTCCTCAATAGTGTTTTCTTTGGAACTAGACATGAGTGTGTTTTCAGTCTCTGGTTCCTCCTGTTTGTTTATACATTCTCTTGCTTTTTTACAGTCATTTGTAAAGGACTATATGAT…
CLocus_58525	1	430	46.19	62.12	249	37999	TGCAGTATAAAATTGTTTCCCAAACTAAAACACAAAACAATGTATGCTCTATGGTCACAAAAAGGATGCTAGCATAGAATTACAGTAAAAAAAAAAAGAATCACTAGTGAATTACACAATCTTTATGGAGGCTACTGACTGGAACAATGTACTGAACCATCCACTACTTGTACAACATGCTTATATCACTCTTGAAGTATACATTTAGTCAGAAGTACAGAACAGTAACCCCTTTTCTATTCTAAGTTGTTGGGTAGATGTGCTGCAGGCACCAAGCTCATATAGGAGGACGAGAGCCAAAGGTCAGTGCTGTATTGAGCACAGAGGAGTAACACTCACCTGCTATTAGGCTATACATGTCTCCCTCAGGTTTTCAACGGATGCAGTCAGAGTTGGAGT…
CLocus_27691	1	431	46.19	62.12	66	18769	TGCAGTGTGCCATGAGGTATGTTTTCACTGGCACCATGATCTGGGAAAAAGTGATAAGGATGCAGGTGTCCTCGAGGGTTGCTACAGAGACAGAGGATATTTTATGGAGTCGGGGGTACCAATCCTGATAGAAAGTGTTCATTAACATCTATATTTATGTTCAAGCCATTTCAAGTGGAACAAGTATTATGCCCATCTGGTGTCCATTTCCCATAATGTCTGTCATTGAGAATAAACCAAAAGAAAACCCAAACTAAAAAGATGACTCATTTTCCTAATGGACCCTCTTCCCTCTTGGCCCTGCCACCTGGTTCAGTGTCACAGATGTCACAGATATAGCCGTTGAAGAGATACCTGTAATAGCCAAGGGCATACTTAAGGTAAGTTAAATGTGAATGA…
CLocus_58018	1	432	46.19	62.12	273	37695	TGCAGGGCAGCAGAGTGTGGATACACTACAGTACGGCGGGATGGGACAGAGTGGAGCAGAAAGCATTATGACTGTGTTGTTCGGAAGGTCAACAGTACATTACTATCAACAAACCAAAGTTACACTGAGAATCTTGCACTGATAGAATATAAAAAACATTTAGCATTTTATTAGCCTAAATACAATATGATTTCAAAATATTCATCACATTTTAGTCCCTCTGAAAGACTATCCTAGATTGACGCTATATTAGGACCCCTTCTAATCCCACATACCCAATGTATTTTGCTTCACTCTCAGATTGGTTGAGCCTCACTTTGTTTGGTTGAGTCTGCCCTGCCGGATGCCAGAGCATGTTCTAGTTGTGTTTGTGGGTGTGTCAACATTTTTATATGGGGG…
CLocus_13773	1	433	46.19	62.12	223	9427	TGCAGTTCTCCTCAGCATTGACCACACCCATGTCCCCTTCTGGGGGTGAAGACTCCATAGCAATGGGTGAAGGGGAAGATTCCAGAACACTGACAAAAACATCAGCTGAACGATTATCTGTGTCATCTTTAAACTCTTGCTCAAGGTCAGGTGATTGGTTCTCGGTTTTACCAGGGTCAGGTGACTGGATCTGTTCGACCTCTTGGTCAGGTGATTGGTTCTTTGTTTCACCTTCGACCTCTTGACCAGGGTCATTCTTAGGGAAGACACAGAGCCCCTCTCTCTGTATGGTGAAGTGGGTCTGCCACTGAGCTGAGGTAGCGGGCCAAGTGGAAATCCTTGTCATGACTTTCTGTAGACTTGGACCTTTGTGGCGTTCAAGGTTTGGTTCGGCCGGGT…
CLocus_58755	1	434	46.19	62.12	103	38129	TGCAGACAATAATAATATCAGGTCGTATAGTAGGCCTACATAACGATAGCCGACTAAACTCAACTCCACGATTTAAAATGGAGTTGGGCGTCACTAGTGTGGGCAGACTGGAGCTCCAACGTCACATGAAATTATGTTTTTAGCACAAACTGCTCACAAATTTCAGCACCCAGAGAATAGCCCGCAATTATACAAAACCAATAATAACATAACTACGGCCGAAATAGGCCTATAATCCAATATAATATCAATGGCCATTGCAATAGGCAAAGTTTACGCCTACTCTAACATTGTGACACTTTGCCTTGATTTTGCATGTTTTTTTTAATAGCGTGCGCATTGAGTATTTAGTCTGTAAAGGGTCCCTTACATAATATTTTAGCCAACAATGGAAATCCC…
CLocus_31106	1	435	46.19	62.12	267	21154	TGCAGGCACTGAGCTGATATACAGTACATACCTTCTCCCCTGGTTTTCCTCTTTCACCAAACTTGCCAGGTTTACCCTCCTGACCCTGGGAGACATGAGTCAATAAACCATTACTTGAACTGCAATAAACATATAATAACAGTATGACGAAGACAAGGCAATGGTTAGAACAATGTCATAAGCAGTTTGCTTTCTACTCAAAGAAAGTAAAACAATTGTTTGTTGGAGAGACAAAGAAGTGTTATGAATCCTACAGTATTTGGCACATAGTAGACTACATTGTTCACCTAACAACCAGTGAGTTAAGTCATCAGTCTGACTTACGTGAACCTGAGAGTCAAGTACAGGAAATGTAAGGTTATATTTCGGAATGTAATAATCCTACGTTTGGACACTCAC…
CLocus_58054	1	436	46.19	63.54	94	37721	TGCAGTTTTGAGTGCTAGACCACACTGAAACTCTGTCGACACCATAACAAGAAGAGAGATCCTGTTGTTGACTGCCTCAATCAACGACAGAGCCAAGTTTGTGTTTGTGGCATAGACGAGTGTTTATGGAATAAAACGTCATTTAATGTATAAGAGGGAGACATAAACCTTTTATTTTAACATTTCGTAGCTTTCGATCGTATTCCTCTCTTACAAACGTTTTTTGCCTCTGTCTCCCGCTCTCTCTCAGTTGGAGCATGAGTTTGGCACTCAGAAGTCAATCTACGGCCTTAGTACAGGAGAGGAGTATGAGGTGCGCGTGCACTGCTCAATGAGGGCCTTCAATAACTTTGGGGAGTTCAGTGATGCCATCTTTGTCCATGTGTCAGAGATTCCCAG…
CLocus_73837	1	437	46.19	63.54	158	46254	TGCAGCAATATTATGCCTACTATATAGACACCAATGGAGGCTGCTCAGGGGAGGACGGCTCATAATAATGGCTGGACTGGCTGGAAATGTAAATGTTAAATTTTACCTTTATTTAACTCGACAAGTCAGTTAAGAACAAATTCTTATTTACAATAGCAGCCTACCCCAGACAAACCCTAACGACGCTGGGCCAATTGTGCACTGCCCTATGGGACTCCCAATCACAGCCAGTTGTGATTGGGAGTCACTGAGATGCAGTGCCATAGACCGCTGCACCACTCGGGAGCCCCTGGAATGGTGTTGAATGGCTGGAATGGAGTATAGTGGCTGGAAATGTATCATACACATCACTCCATTCCAGCCATTATTATGAGCCAACCT
CLocus_39211	1	438	46.19	64.68	152	26171	TGCAGCCACCTCATGACAGCACCTTTGAATAACAGAAAAAAATTGCAAAAGTAGTCATTTTGACACCACACAAAAATCCTAGGATTCCAGACCTCAAAAGGAATAGGAAGCACATCAACATAATAACCACAAAGGTTTTCAATTTCAAAACAGATCAAGAGATATAAATATATGCCTGTTGTAGCACCACTGTGTGGTCAATCTGAATGTGCATGCATATGTTGAGTCTTGACAGGGTTTGGAACATGTGTACCAAGTTTGGTTACAATACAAATATCTGTGTCTGATTTGATATGCATTTATGTGTCAGAACATTCCCACATTGTTTATTGGTCAGTTGACATTGAAGTTGACATTTTAAAATGGTTAAGGTGAAAAATGTTAGTGCTTTTTTGTATT…
CLocus_14298	1	439	46.19	64.68	21	9944	TGCAGTCATCACAATTCAAGTCTACACGTGTTTCCCAAACTCCGTAGTTGGTAAAGAAATTATGCGTGTAGTTGATGATTGCGCTGCTGCCTTTTCTGGATGACATGCCTTCATCAATCAAGTAGTTGACTTGTGGTATTCCTTCACAGCAGACACCAAACAAGCCACACTTGCGAGGAGTTAAAAAGTAGGTGGGACCTGGCTGCATAGGGTCAGAAGGATAGTGCACCTGCAAAAAACAAAAGAACATTAAGATAAGTTCATGAAAAGAAAATGTAACATAATATAATTTTTTGATGGATCATTATCAGGTAAGTTTCACTTACTTACAAATGTGCAGTGTAGCAGCATACAGAAACATCATCTTGGAAACTGGAAGTTAAAATGATAACACACAGC…
CLocus_12618	1	440	46.19	66.68	263	8644	TGCAGAAGGAGGACCAGTTTGTTTTTAGTTTTTCGGCTTTAGCACAGCTTGAACAAATTATTAACCTCTAATGCATGATCATTGAGCAACACAATATTATTCACTTCTATTGTCTCTTATTCTCTCCCTCTGGTTTCCACTTTTAGTTACACTAAAAGTGTCATCATTGCACAAGAAACAGGAACACCGTGACATTGTATTGTTATTCTTTAAAACAAAGACAACCTAGGAAGTTATCCAGCATTTTTTGTCATCTTGTGACAGACACCACGAGAGAGGGGGGCCCGTTGGCTATAGACCAGCGCAGGCACTGGGCTGGTTTGTATGTGGCTGGTGTGTGTGTTTGTACACACATTTATGTGTAGCTGTGTGTGTGTGGGCATCAGTAGCTAAAGACCC…
CLocus_4295	1	441	46.19	66.68	179	3104	TGCAGTACGCCACCAGACTTAGAGACATCCTCTCCAGAGTATGATCCAGTCTCACTGAATGATACTGAACCAGAACCTCTCATTAAGACAAGCGAGACCCTGTCAGACCTGGTCGACACTCCCCTGTCTAGTAACGTCCTGACCCAGACTGAGACCAATCCTGGTCAAGAAAATCCTGAAGAATTGGATAACAAACCCACACAAATTAGGGCTGTACAGAGTGAAGGCAAATCAAACAGAAATGGGGTGCCAAAGAGAGCAGGCAGGAGCAGAGAGAGTACAGAGCATAGTGGAGCTCCCCCTAGTGGTGTCTCCCCCAGTGACGACAACCTGCTACTGGATAATGAATACGCCTATATTGACTTGCTGCACGAGGTGGTTCAGAACCAGGGCCGGTGG…
CLocus_101244	1	442	46.19	66.96	109	58854	TGCAGGCACCTTACTGCAGCATGATCGCATCGGTCGGCAGGTTTGACAGAGTGAGTTGCCCCTCAGCAGAGGATTCTCCAAGAGAACCACAATAGTTGCTGAAACCGCGCTGGAAAGGAAATGTCTGAGCCAGCAGAGTTTGGTTTGACTCAGCATGGTAGTATGAAAAGGCTATAAAAGTTTTTTTATTTTACCAGATGGTGTGTCTATGGAGCCTGCGGTCGTACACCTTCATCAGGAACTTAACGGGGATCAACCACAAGACATTCTACCTGTTAGCTTCCTGTGACTTCTCTCCCGATGGGGCACTGCTCGCCACCGCAGCCTTCAGTGGTTCCAGTTGGTGGATCGATCTGTGGGACCCCTACACTGCACAGAAATTGTCTTCTCTAATGTACA…
CLocus_37868	1	443	46.19	67.24	26	25321	TGCAGAGGAACAAAAGAGACATGAGAAAATTAGTTTTGGAGATAAAAGTTCTGAAAACATGTTGGCACACCATTTAAAACATTCAAAAGGAAGATGGAGAACAAGCTATAGGATGAGAAATACTGGAGTTTTGGTGCAGGTACAGCCAACTAGTGCTAGCTAATGTTAACTACCTAGCAAAAAAATAAGATATACACCGAGTGTACAAAGCATTAGGAACATCTTCCAAATATTGAGTTGCACCCCCATTTGCCGGGGGTGCAAAAGTGGTCCACAGAAATGCTGGCCCATGTTGACTCTAATGCTTACCACAGTTGTGTCATGTTGGCTGGATGTCCTTTGGGTGGCAGACCATTCTTAAAACGCACTGGAAACTCTTGAGCAGAAAACCCCAGCAGC…
CLocus_3409	1	444	46.19	68.37	177	2523	TGCAGAGGCAGCAGTGGAACGGAAAATCGTCTGACACACCGGAGGAAGAACAACACCGAGACGGAACCCTCGTGCCTTCAGAGGTGTCCTTTTCAGTCAGGCGATATCATGTTACTGGCCCAGTGTTGCCTGTTGTTGATGCAGTTGACACGGAAACCCTGCTTGAGGAACTGTTCAGCGCCGATGTTATGTAGCTGTCAGTTATCTACATGTTGCGACATCACTGTCTACTCTAAATAATCATATAAGACTTGTCGTATTGTATAACATGTCCTCCATCATGTAACATGAATGATAAAACGATTTATTTTGCACGAGACCCTTACAGTAGTAGTGCGACAACAACTACAAAACGTAGGACAGACAACTTGGCAACCGATGGGTCTGTCAACTCTATTT…
CLocus_102084	1	445	46.19	69.79	127	59218	TGCAGGGAAGAGAGTGGACGACCGAAATAGGGAGAGGGTAAAATGAGTAAGATGAGGTGTACAAAAAGAGAGGAAAAGAAAAAGAGCGAAAGAAAGAGAGAACAGGAGAGAACAGGTGAGAACAGGTGAGAACAGGAGAGAACAGGAGAGCAAACAGAGAGCAGTGTGGCAGTTAGAAAGTTAAGAAGTAGAGGGGAGTGAGGAGAGGAAAGGACAAAGAAAGAGAGGAGGACATGACGAAAGGAACGGAGAAAAGGAATCGAGTGAGGGGATGAGGAGAATAGAGAAAATGGAGAGGAGACAAGAGAAGATAGGAGAGGACAGCAGGTAGCAATGGAGAGGAGAGCAGGCCTAGTCCAATCTTGTATAACTCACATCGTATGCCCCGGCTTTAATCTG…
CLocus_10087	1	446	46.19	71.79	21	6790	TGCAGCCTGCTGTTCATCGGAGGTTAATCAAATCTGTAGATGTCAGACTTTGCCAGGGTGGCAGAGATCTTTTACATGTTAGAGGCGCTGCTGAGCAAAGCTGGCTTGTCTGTCTAATGCTCTTTTTGCCTCTTTGTCCATTTTGATTGTCTGTCTGTTTACCATCAGTAAACATCTTACATGCTCCAAACACTCTTTAATAGACTTATGTGTTCTCCTGTTTCAGGCCAATGAGGCTGGAGATTCCTTCCCTATCTGGGGCACATGTCTGTGGATGCAGCTGTTGACTTTTCTAATGGCTATAGAGAACCTGCTGACCAAACCCACAGCTGAGAAGATGGCCCTGCCCCTGAACCTCACCACAGGTATGGCCCAGTCCTTTCACACCTCTATAGGGGA…
CLocus_85568	1	447	46.19	71.79	41	52147	TGCAGAAGTTGAACAGTTCCCCGTCACATTGTCTGATTCATTCTATCACAGCTAATCTCATTTGTCTGTCTTCCATTCATAACCACAAAAACTCCAACATTAGCCTGATCATACACAGGCTACTCTTTAGTGTATGTAGTTGATTGGTTCTTCAGAGAGAATACAGGGTATGCAGACCTACAAATTGTCCATGTGTTTGGAACATGTGGATCTCTAAAGCACAGTAAGATATCATATATCGAGCACTAGCGGAGGACAAAAGGAGAAGTAACCTTCCACCCATCCGTGCAAAAAAATGAACAGAGCAGATAGAGAGGGAGAAGTGTAAAGTGTGCAGGAGGGAGAGGTAAAAGTTAGTTCCTGATTTCAGAGGGGCAGCAGGTAGCCTAGTGGTTAGAG…
CLocus_42255	1	448	46.19	71.79	80	28077	TGCAGTTGCCAAGAAATCTATCAATCAACAGTGAGAAAGAAAGCTCTCCTGTGTCCTGTTTCAGTCCGTTTGGCCACCAACCATCACCGTCATTACCGTTTGTGATAAAACTATGTGGCATGGCACATGAAGACCTGTTCCTCACCCTTGTTGTCATGCCATACGCGGATCTTGGAAAGCTCTCCCAGGCTGAGGATGTCTGGGAAGCGGAACACGTCTTTTGACTTCCGCTCAAACTTGTTTCTGCTACCGCCCTCCTTTAGTGCCAGCGTACCAGTGTCTCCGTTCTCCCCAAACACTATCAGGAACACGTTGGCATCAGTGCCCGCGCCTGGAAGAGAGGAGGAAAAGGGATATTAAAGATGGTGGGGGAAAAAAGGTAGAACTAGGGGATTCAGG…
CLocus_35518	1	449	46.19	71.79	130	23877	TGCAGAATCAACACAATTCTATGCTCTGAAATACCGCAGGTAGCAAGGCAAACAAAATACCTCGGTACACTATATGATGACGGACAAGAAATGTGTTTCTTTTCAGGTTGATAAATATTGAGATTCGTCAAGCGGCTGGGTCATGGGTAGACAAGTGATTGACATAATTTCCAGTAGGAAGGAAGAGTTTGGTTTTGGAACAGGTTAGGGGTGAGCTGGGGGGGAATGCTGAGGGGTTGCCAGAGTAAAGTTGATTCAGTGTAGGATGTAACCAGGACTTTTAGATGAGTGGACCCTCCGCAGACTGACTGAGAGGATAGGGAGGGAGACAGAAAGAGTAGGAGGAAGACCGAAAGGGAGAGAGAAATAGAAGCAGGGATGTGGGAGAGAAGAGGGTAG…
CLocus_21708	1	450	46.19	71.79	51	14968	TGCAGGTCGGGCCTGTTGCCTAGGAAGTCTGGTAGGAAGCGGTTGAATTGCTCCATGTCGGGCCTCAGTACCCCGTTAACGGGACTCTTCATACACTTCTGCCCACACAGGAAGGCCGCTACGCACACAACACATTATACATCAGGTTAGATATACACCATGTTTCTTTGTGTTTTATTCATGCATAACAAACAGAGAGGATAATGTTCTTTGTTTTTAGTTCCGGTTGTCCGGCTGTCTCTGAGGTACTTGGTACTCACATTCGCTCGCGGGACAGAATTTCCCTTTGTTAGGACCGAAGGAATAGAGCCGACAGCATTTGGATCCAGGGTTTAGCCAGTCAATGAAGTCGTCCACCCACGAGTTTGCTGGGATGGCCAAGTAAGATCTGTTAATCAT…
CLocus_59691	1	451	46.19	71.79	117	38639	TGCAGACATGGACGGAGAGGAGTCCGAATAGTACGTCTAACATTCCCATTACGCTGTCAACTGAAAACATCATACAAATCTGAAACACTGAAATCCAAACAAACTAACAAGGCATAAAACCAGAGACAGACAACACCTATTGAGATGGTATCCACAGAGACAAGCTCACTTGCTGATCTCCCGGTGTACAGCACAAGGCGAATGCGTTTGCTCGTTCCGGAGGGACTCCCAGGTGAATGTTGAAGTTCTGTATCTTCAGTGGCACCCAGACCTCTTATACACCCTCTCCGGGAGTGACACGGACCCCTGACAACCACTTAAGGTGTGTATTAATGAGCCTGTCTTACTCCCCCTTCCCCCTGATAGTGCTGGGCTGGGCAGAGGCCTGGCCAGTGGTAC…
CLocus_104056	1	452	46.19	71.79	13	60036	TGCAGGATGAAGTGAGGTGGTCAGTCACTCACTTATCCTTCTCGAAAGAGGAGAGAAGAGAGAGAGAGAGCAATAGAGAAAGAGAAGGATGAGAAGACAGACAGAGAGAGAAGTGGTCAGTCACGCACTTCTCCTTCTCGATTTCCATGGAGAGGCGCTTCATGTCTGTGTCTTTGAAGTCGAAGCTCAGGTTCTCTCTGCTGAAGCTCAGGTCTGGAGGCATCGCATCACCTGGGACGGCCGAGGGCTGGGAGGAGGAGAGAAAGCGAGGTAGAGGGGTGGGGAGGGAAATGAGTGAGTGAGGATATGGGAGAAGAGGGAGAAAATATAAAATGAGAGAAGGGGATAGTGAGTAGCAGCAGAAGAGGGTGACAGAGATAGAAGTAGATGGGAGAAGAT…
CLocus_53711	1	453	46.19	72.64	20	35194	TGCAGTGATATCGACTGACATATGCTCAGTCTTAGCCTCGATACTAATGGGAAGAACAGCATTTTGCGTCTCTGGAGGGATTTGATTCAAGCGAGGCAGCGACTACATGTTTTTGTCCATTTTAAACATGTAACCATGCTGCTGTTTTCGAAACGTTACGATAAGACGTTTCATTTGATTGTTTCTTTTTTTCCCTTTTAGTTTCCAAACTGCCCCTGATCCCAGCCCTGTTCACTCTTAATGGCTTTCCCTGTGGAAATAATATCTGTTCATTTTATGGGTTAGGATCAGGCTTTTTAAGTATCTTCTAAATTGGAGGACTGCTTTAATGCCGTCTCAACATTCTGTTTAGATGCTCAATTAGATTTGTAATTGCTCCTGGGGCGTGATTACGTTTAT…
CLocus_16375	1	454	46.19	72.92	175	11284	TGCAGTTATTTCATAGGCCTCCGTCTGACACTCTCATTTAATTCCCTGAAACCTGTTAGTCGTTTTACCATAGTCTTGTTTTGTAAAGAAAGTTTGATGACTGCTTGTAATTGTGGTCAACGGACATAAGGGTCAATGGCCTTCCAAGCCACCGCACTATGATTAAGTGCTCAGTCAATGGGCAGTTTTAAAATGGACAGTTGACATAGTAAAACTATCCACACACCACTTCCTAGTGACTGAAAGGTGACCTTTGCTAATTTTGTATGCCTGCTCTTTGGCGACCCTTCTCCAGGGCAGCAAGGGTCATATGGGTCACCTGGGAGAGACTGGGCCAATTGGTGAACAAGGAGAGGCAGGATTTGTCGGGCCGAAAGGATCGAGAGGAACCATTGGACC…
CLocus_42056	1	455	46.19	74.06	285	27945	TGCAGGTAGGATGATGCAGAGAACGCGCTAGCTAGCTAACCTTCAAACATGTTTCACGCATTACTCTCTGTGGTCTGACATTACACCACTGCCATTAATGTTAATTGGTAAAGTATTTCTTAAAATGGAACTGACTAGCTAGCTACAATATATAAATGTCCAAAAATAGCGAAACGTTTAGCTAGCATTAGCTAAATAGCATTGGTCAACGCGCTAACTAGCTACAGTAGTTAGCTGTCAACAGCTAGCGTTATCTACATCTCGATTTGAGAAGGAAAAAAAAAAATATATATATAGGCAAATAGGACCAGACCCATACTACCAAGATGTGTAGTATGGTCTTGCAATTGTTAATCAAATGTAACGCTGGTCAACAACACGTTGGAATGGATTCTAAAG…
CLocus_1953	1	456	46.19	74.34	145	1654	TGCAGTGTACCCACTTTGTCTAGTAGTGTGAAGGCGACTCTTTGGGGGTACTCGCTGTCTGCTATCACCACTGCACTCAGACTGTCATTCCTCACATTACACATGGCACAGGTACTCTGGAGGGAGGAAAGGGTAGAAATTATAGGTGTCCTCACATAACAAATAAACTCCCATATGTTATAGCCCAATGTATCAGGGCTTAACCTTGTTCTTTGGGCTTAACCTTGTTCTTTGACTGAGGCTCGGCTGCCGTGTGCAGAACGCTCCACAATCAAGGCGCTGGTGAAGGTCATGAACTCTTGGACACTGCCAAAACCAAACACAAACAATGGTGAAAACATTGTTGGTGTTCTTGTCAATTCTAATGAAGTCTAAACCCGTGACAGGTTTAAGATAGGC…
CLocus_88326	1	457	46.19	74.34	237	53520	TGCAGCCCTGACCAGACCACAACCGTTAACGTGACACGCACCATGAACGTCAACAGCTCGGGGATTATCAAAGAGGCTGTGGTGGGTTACCAGGCCTACTTGTCCACCTCATTTGCTGACAAATCCTTTGAGTCCTGCAAGAACGTGAGGATTCCCGCCACGGGGGGGTATGCCATCGCTACCATGTGTGGACGCTATGGCTCAGCACTGTGTACGGCTCAGCGCTGGTATGACTTCCAGGGAGACTCCAGTAATGGCCTGGCCCCACTGGACATCGACTTCAGGCTGATTCCAGAAGGGGTCACCGAGGGGATACCCGATGGGGTAGTGCCTTACGCTGGGAGGGCGCTGGGGTGTAACGAGATGACCCCAACAGGGGCAGAGGTTTGCTCCTGCCAG…
CLocus_101288	1	458	46.19	74.34	96	58862	TGCAGTCAACTGCAAGTTTCAGCAGTTGCTCTTCACCAACTTCCTCCTGGAGCCATCGCCTGCATTGTGGGAGGCTCTATTGTCAAACAATCATTTGTTTTTTTGTTGTTGACCCGGCTGTCACAGATGCACCTCCCCCGTCTTCACTCCTCGACTTTTTACAGTCGGTTGCTTTAGCCTTACCACTCAAACGCGTCCAAAAGCTGCTCATAGCAATGTCATTTCGCTGAGTCTACCTCTTAAATTTTAAGTCAATCTCAATGTGACCACCAGATAGAGTAGCTTGAAAACCTCATTAGGTTTTTTGCCCTCTATGTATTATTATTTCTTGTTAGTTTAAGAGTAATTAAAGTAGTTTCAGTATAGTTTGTTTTTCAAACAGGTTTGTTTTATTTCAGT…
CLocus_12265	1	459	46.19	74.9	201	8385	TGCAGACAGAGTGGGCCAGGCTCCTCAGACCCACCATCCAGTTCTTCCTGATCGCAACGTCCATCTACGTGGGGCTGTCACGCGTCTCAGACTACAAACACCACTGGAATGACGTACTTACTGGCCTCCTGCTGGGGGCGATAGTTGCAATACTCACGGTGGGTAGCTAGCTTATAGGCCAACGGTTCCCAACCAGTTTGCCTTGAGGAACTCTCATGTGTGCCACAAAACTGTTTAACACTCACTTATAAACGTGGCCTGTGGAATGCACATGGAATTTTGATTTGGGAGCACGACTGCCTGTCAGACAATACATGAAATGGCACATGGTTACGTCTGTATCGTTGTTTAAAGTCCAGTGCGCTCAGGCTGGTGTTACATATGTATCATTTTACTTTG…
CLocus_460	1	460	46.19	74.9	132	605	TGCAGAGACAATCACAGCCCAGTCCACTTCATATACAGCATCCTACCAACCACAGGCACTAACAGTGTCAGACATGCAGTAGTGCAAGCTTCCTACACAGAGAACATTTTTCTAAACTCATCTAAAGTTTCATCATTATGTGAGATGTTTTGGAGTTGTACGCGAGTGTCGACTAAAGTGTCTCACCAAAATGATTTTTGTCTCGTCTAGCTCAGCCTGCACTTTGGTCATCGCATCTGCCTCTCTGGGGTTCTGAGGAGAGAACACAAATTCTGTCAAACTTTCACAATCATCTAAGAAGAAACATGAAAGATTCAAAGTAGGGTTGGTTATTCAAGTGTTATTTTATTAATCTATGTGCAATGTACACTACCGTTCAAAAGTTTAGGGTCACTTAGA…
CLocus_26438	1	461	46.19	74.9	31	17919	TGCAGAGAGGTGCATTACCTCCTTAGCAACAAGTGAAGAATATTACTCTCTGTTCTGGGTCTTGTTCCTCTCAAGGTTTCTTCCCAAGTTATTGCTCCTCGCCAGGCCCTTTCGGCTTTCTTTTTTATGTAATAGATTGATGTTTGATCATGTAGGTGCTAGAGGAGTTCTCCAGGCAAGTGGAAAGTATAGACTGGCCATCTGGAAACCCAGACACCATCAACTACAAAGCCCTGGACATCCACCTGGCCAAATACCAGGTACACATGGCATCCTGTCTCTGAAATAGACACATAACATGCACTACCGTTCAAAAGTTTGGGGTCACTTAGAAATGTCCTTGTTTTTGAAAGAAAATCAATTTTTTTGTTCATTAAAATATCAAATTGATCAGAAATA…
CLocus_38958	1	462	46.19	74.9	136	26048	TGCAGTCTCCCCTGACCCTCTGGAGCCTCCATGGTGTTAGTCTGAAGAGGGTTAGCGTTACTGTTTGGAAAGCTTTGTGTCCTGCCCCTCCGGTCCTCTCTGTCCCATGTTCTCTCTCTGTCCCTGTCCCTGTTTCTATCCCAGTCACTAGCTCTGTCTCTCTCTTGGTCTCTGGTCTCTCTTTCTCTGTTTCTCTGGCTGTCTCTTTCTCTGTCCCTATCCCTCTCATGGTCTCTATTTCTCTCACCTGCACTCTCTTTATCTCTGTCCCTCTCTCTCTCTCTGTTCCTCTCTTCTGCAGTCCCTCGTTCTCTGTCCCTCTCCCTATCACAGTCTCTATTCCTCTCTCCTGCTCTCTCTCTGTCCATCTCTCTGTAGTCCTCACTACGAGCCGTTCGA…
CLocus_58845	1	463	46.19	74.9	17	38185	TGCAGACATCAGGCTGTAGTAGAACACCTAATGGTGGAGCAGAACCCATTGGTGGGTGGGTCGTGGCTGATTCATTGTGTGCCATGTTTTAAAGAGACTTTGTCCAGAATAGAAACACAACAGCTTTAGAAGGATTACAAAGTCAGAGAGCATATCCCCTCCAATAGGACACTTTCCAAACACATACGTAGGGGGACTTCAAACTAACCCATATTTTAATAAGGCTTTGTGTATCAATGAGAATCTGTAGACATCACTACACAATGCTCTATAAGTACAGGCCACCCCATTTTAGTTCAACATAAGTTCATCCGCTTGTGCTATAATACCAATCAATTTGTGAATTTGAAAAACCTGGGAATGTTTCAAAGTTTTCACATCTTCATAGAGAACAACAAA…
CLocus_68216	1	464	46.19	74.9	273	43231	TGCAGAGGCAGTACCTCACAGATTACCTTGAAGTGTAATAGTGATGGACACAGTCCAGGCAGACCAAACATAAGCATAGATCTTATGATGAGATGACTCTTGTCCTGTTATAATAGCACGATGGGTTGCTATCTGTCCTTTGGTCTAATTACCTACCTGAGAAGTGAGTGATAGATAGTGATCGCCCAGTTCCAAAAACATCCCCATAGCCCTGAACCCTTTGCAAGTCAAGGCTTGATAATGTGATGATTCCTACCTCCCACTTCAGATGGATTGCCAACATTTTCATCAGTCATTTTTGAGAAAGAACAGACCCCAGTATTTTCTAATAAGAAATATGTGAACCACTAAGTAAACTGAACCATATAGTGAAACATAAGTGCAAACACAAGTGCAATT…
CLocus_64897	1	465	46.19	75.18	62	41541	TGCAGATACTCGCCTTTGAATAGGCTAACTAGCTATGCGTTTTGAATCGCTTTGGTTAGATCGCTGTAAAGCAAATCCTTTTGCCACAAGTGTAAATCAGGATCTGGGCATTTCCCGGAATATTGAACCACATTCCACAACTGATATTGAATATAAATATCCCATTATCATAGTGACAGAACGAAACCGAAAAGTATGAAAAATGTCAGTCCTTATTATGACATCATACTTGAGAAAGCCACCTAGCTTGGAATAGAATGTAGAATGCACTCGTTTCATCGGCCACATAACTTGCTTATGCATACAGATATGCTAATGAAGTGTGTGTTGACATCGACAAAGTATTGCACAGTCTTTTCTATAGAGAATAAAACACCAAAAGCTAATATAGCCTTACTC…
CLocus_75654	1	466	46.19	75.18	243	47256	TGCAGGGAGTTGGCTGGCATCAATCTGAGTCAGTTGGGTTCGCTCTGGACTGAGAGGGCTTGACACTTCTGTCTGTCAGAAAGCCAACAGGTCAGACGGAAAAGACAGACGGCCTCCTCCGCTCCTCAAATCTGCTCCACTGCTTTTTGAATTCACATTATTCTCATAAAACCAACAGGCTGAGAGATACAGGGAAGGGAGATGGATACAGGGGCTATTCTGACCAAGGGGGAAATAAGACGGTAAAGGGAGAGAGGTGGGGGATTACTTACAGAAATTATGATTTGGGGAAGAGAGAGAGAAGGGAGGATACTGACAGAAAGAGGGAGACATGAGAAGGTGGAAGGAACAGATGAGTACAGAGTGAGAGAAGGTGGAGGTGGCAGAAAGACAAAGAGA…
CLocus_2143	1	467	46.19	75.18	297	1775	TGCAGCTGACCCATTCTTGTTTGTGCGCGTGTGTGGCGAGGGTAGTTTCCCTCAGAGTGTGATGGTCATTTTTAGGTTGCTGGGAAGGGGTGAGAACGGGAGGGGGTCTGACCAGAAACAATACTCTCATTCTGTCCAGTCACATGCCTACGGTGATATTTTGGGCTTTACTCAAAATACTTAAATGTGTCATGTGCGAGGCATTCCGTCTAGACACAAGACAACGGGGGAGACGGTTCGGGGGTTACTATTGGCTTCTGGTTACTATTGGCTTCTGGATACTATTGGCCTCTGGACACTATTGGCATTTGATTCTGATTGTTTCTTCTCTGACGATTAGAGGCATTTTCACATCTAAAACCTGTAATCTGGGACACTGTGTCTAGACAGAGTAAAGGG…
CLocus_37751	1	468	46.19	76.31	49	25239	TGCAGGTAGTTTGGTCCAACTAGACCTTCACCACCAGGGCAATCCCACTGCCAAGATAGACCTTATTGATTTTTGGAGATGAGGAATGCAGTTGTAATGATTCAATATATTTGTTTTAAGAAACATCAGTTGTTCACATAATCTAAGTCAGAGGAGTAACACAGCATGCGTTCAGGATGCAGCACAAAATGAAAGGGCAAGATGAAAATGGGATATTTGCTCTTTGGCATAAACAAACAACATGTGCTTTCCATAGTCAACTGGAGAACACAGAATTTGTGATATTCTGAAGATCTCAGTTTTAACTCTTGAAGTGATCCATTGGTTCGCCGTGCTCAGTGTGAGGCTATGGTGTGAGGATGAGCTATAACATCAGCATTATTGCCTCGCAAAATCATT…
CLocus_36770	1	469	46.19	76.31	194	24647	TGCAGGGAGAGCAGGTTTTCCCTCTACTACAGAACAGAGGACACGGTCAAAAGGAGGGCTTGACACAGCGCCTTTGAAGACTAATGGCATTATGGTTTCAACCAGGCAGCTGGTTATTCGGGGCGAGGGGGAGCGAGCGAGAAGCGGGAGGAGTGCATTATTAAGTGTAATGAATGTCAGCCAGTGCATCCAAGTTGTCTGACACATCAGGTGCCAATTATATTGGCAGGCCCATTTTCCCCCTCATCCACTCTGTAGCTCTGAGGAGAGTCTTCTTTGGCATACCTGACATCTGCCTCATTAGCTGGGACAGACGGACAGACTGAGCAGGCTGGCCGCTGTGCTCCATGCCCGCCCCAGGCCTCCCTGGGCCTTCACAGGGGCGCAGGGAGACTATCC…
CLocus_76736	1	470	46.19	76.59	17	47758	TGCAGCAATTATATATATTTTTTATTGTTTACGTTTTTTGAAAAAACGTTATAGAAATTATTTTCAAATTTTGTCAGGAAACAGGGTTGGGGTCCATTCCAATTTAATTCAACATTTTAATTCTTGAATTCACTCAAGAGGTGGAGAATTTACATTTAATTCAATTCAAATGTTATAAATCTTCAAGTTATTGAATTGAAATTAGACCGTGTGGGCTTTTTGAGTAGGAATTGAATTGGAATTATAAAAACATTTAAAGAAAAATACCACCAGCAATTTTTTTTCATTAGTCCATACTGTCCCAAAATGTTTTGATCAAGTTTTCAAGATATAGAACTTAAAAAATACAGAAAAAAGCCTGTTGCAAATTCG
CLocus_42928	1	471	46.19	76.59	18	28580	TGCAGTACAGTCTCTTGCAAGCACAGTAACTTCCTGTGTGCCCAGGATTGCATGGTATGCAAGAAGTGGGCAGTCAGGGCACTTTTTCTCAGCTGGTATTAAGATAATCAAAATCTAATTGTATGAGCAGCCACAGTATTCTTTAGAGTTACAGTACAGCCAGAGGATAACTGGGACCAAGCTACTGTAGAATCACGAAGAGACTTGTGGAAGAAAACAACTTGAGCCATATTATATAAGCAAGGAGAAATCAAAAGCATGAAAAGGCATGCATGTCAGATATGTACTCAAACAAAATTACAGTGATGTAGACCTAGTAAAGTGCATATCATGTAGGTAATGAATTATACATTGTGTCAAAGGTGCACAGTAACCTACTCATACTAAATTTGAGACTTT…
CLocus_73071	1	472	46.19	76.59	158	45873	TGCAGCCTTTTGGTGTTTGGTTTAGCCTGTGTGTTTAAGTCACTTTCTCTGAGGGTTTTCCAAGTATTCTGTCATAACAGAAGGAACAGCTGAGTATTCCTCCTGGGCAGTGGACATTCCAAACATTTTCTCTGTTCTACAACAAGAGAAAAAAAAAACTTAGGAGAGTAATGAAAACACTGTTTGTGAGTGGCATCCCATGCACCACCGGTCCAGCCTCTTCCTCAATGGGAGGGTCCAGCCTCTTCCTCAATGGGAGGGGCCAGCCCCCTGGGACATCTCTGATTGACAGGCCTGTCTGTGCCAATGACAGCCCTGTCTCAGTCAATAACCAGCCTATCTCAGCCAATGACACAGTGGAGGGGTGAGGCGAGTCCCGGTCTGAGCACGCTCTGTCAG…
CLocus_29314	1	473	46.19	76.59	99	19921	TGCAGGCTGCTCTCTGTGTCTTTATGCTGTTTGTGAATTTGCATGACTGTCCACCGCCCTCATTCGTTTTTCTTTATTAATTGCTTTCATTTCATGCAGCACCACCACAAGGAGCGATGGAAAGATAATGACTCCAAGATGATAAACACAAGGCTGATGAATATGCAAATTCATCAGCGACCGACCGGCACACAGATCCCTTTATAAGACTATTATTGGTCCACACTCAAGCCCTTAACATACATGATCTAAAATATGTCCCTGTTTTATATGGGGAATAGATTAATGTCTTAAGTCGATTATGTAGAGTTAGCATTTCAATTGTTTTTAGTCTTATAATGTAATGCGATGTTCGTTTAGTAGTACCTTGAATTTGCAAACCCATTAAATATATATATA…
CLocus_61078	1	474	46.19	76.88	223	39465	TGCAGTACTTGACTGAGATAACAAACAGTCACTACTTTGACATAGTGTGAGAATCGACACCCATGCAGTTCTTCAGGCGGCAGAATGTTGTTTCAGGGGTTTGTTGATGTCAAACCTGATGCAAATGAACCATTCCCATGGACTTTTGGGGTAATTTTTCCCATGACCGCTTAGATTACCTCTAGATTAGATTATCCCCAAAAAATGTAAGAGTGAGATAGCAAAACCTTTATTTAGTTATTTCAGAGCGCTAACAAGACCACGCTGTCTTTACCAAGAGAAAACCTCTCTTTCTGGCAAATGTTAAGTTGCTTGCTATTGACAAAGAGAAGTGATGTTGTAATTAATATTGTAGCCTAATACTCCTTTAACAGATGGTAGCAATTTATTTCAAGGTGA…
CLocus_19658	1	475	46.19	77.44	49	13500	TGCAGAGATATCCCATCCCACTTTGTTTGTATTGCAGGGAGACACAGTAGTGATCATTTTGATTAACCTTCTATTACAGATACGTTTTTGAAAAACTTGTCAAAACCTTTAAATTTAATTTAGAGAAATATCATCTCTATCGGATCACTGTAAAATGTTCAAGGTTGATTGAATGAATCTGAAACTTTTTGATTGATTGAATTACTTATGCATCTAATTATTATGTTGTTAGATGTTTAAATTATCACTTTACCTATCTTTTGGTAAAATACCAGGTGTTTCAGTGTCAATCATAGAGAATTGATAGAGATTGATATAACTCATATTAGTATAGACATTGCCATTGAGGGCTGGGCTTCCACCATTTTAATGTAGTCAACTGGGTGGGGATTCCAATTT…
CLocus_58024	1	476	46.19	77.44	77	37697	TGCAGCCCTGGCTGTGGAAGCACCATGGGGGTTAAATGTACATGTACACGTTCCCATAACCAAGCACCTACATTGCAGGTTCAGTAAGTCAGGCTTCCAGCACGTGAAAGGAGCCAATCAGAGCAAGGAGGAAATTAATAACCTGAGAGTTGGGTCTGAGCCGCAGGGTTAATGTCCTCTAAGCCGTGTTAATTAAATTACTCCTGCTCTTGGGCGACGTTTGGCAGTGGATTAATTATATTTAGTTAATGCTGCACAATAACATTGGCTGATTAGACAGGCAGAAATGATGAAAACACCAGAGGCCTGGGCGGCAGGTAGCCTAGCGGTTAGTGTTGGGACAGTAACCGAAAAGTTGCTTGTTGAATCACTGAGCCGACAAGGTGGAGAAATCTGCCT…
CLocus_51324	1	477	46.19	77.44	47	33629	TGCAGTTTCTGCAGCCAACTAGTTAACGTTAGCTAACGGTTTCTCTCCTGATTCAGCGGATCTGGACAGAAGAACATCGCTGTTTGGTTGTGGCAAGTCGATGGGTTGTGTTGAAGTTGTTAGTTAAACTAACGTTACAAAGGGCATTGTGCAATCTAGCTACAATACTAGTATATGCATTGAATGTGTCAAAGTAAATTATAAATGGACCATAGCTCGACAGTATCTTTGTCGACACGTGAAGTTAACGCTGTTAGCTGGCTATACGCTAACGTTACCTAACTAACGTTACCTAGCACAGAATTAGCTACCAAGCTTGCTCGCTAAAGCTAACTTAACTAGCTAAATCACGTTAGCTACGTGGCCCAGCAAACCCACCTAGCTAGCTAGTTATCTAGC…
CLocus_48682	1	478	46.19	77.44	144	32077	TGCAGCTTTCAAGCCTTAGATGATTTACGATCTGACAAGAATTGTTACTAAAGTGCAAACCCTGTGCCACTGGTAGGTTATAATTCCCATTAAAAAGTGTAACCCTTCATGGGAAAGACGTCAAGATATAGTAGAGATGATAAAGGAAGAGTTAGGAATAAGTCCAGTTATCTCAAATAAACAAGGGAATGAAATGGGTGTATCAATCCCTGATTCTGGGGTTAGAGGTATACACTGAGTTTACAAAACATTAGGAACTACTCTTTCCATGACACACTGACCATGTAAATCAAGGTGAAAGCCATGATCCCTTATTTTAATTAGTTTTTAGTTTTTTTCTCTCCCCAATTTCGATCTTTTCTTATCTCTGCAACTCCCCAATGGGCTTGGGAGGCGAAG…
CLocus_13560	1	479	46.19	77.44	178	9281	TGCAGCACACGCACCTGAATGCACTCATGACTATGCGCACCCAAATTAAGATCAATTTCTCTGAATTGCCTTGTGAAAGCCTAACAAGCATGCCTACCTGACCCAGATTGAGATTTATAATGGACTGTTTTTGAATGAGCACATGCGTAAATTACAACAGTAATTGTGTGATGGGGGGATGCGGGGTTGTGTTCCAAACCAAACAACTACAAGTGTGCTTGTTAAAGTTCCTCAACGGCACAGCTAGGAGAGCTCAAAAAAGTACCTTATAGTTGAAGTCTCTTCTTTGAGTCATAAAAGTGAATGGAAATTGCTTAGGTACTGGGCACACTTTAGAAAGGTGTGTGTCCACTTGGAGACACCAGTTAGTCCTCTCCTTCAAACCCTTGTAATTTTTTG…
CLocus_110625	1	480	46.19	77.44	16	62645	TGCAGTAGTCTTCCAAGAAATGTACTGTAGCTATCCTAGGAAGAGCCTTAGGATTATTCCCTTATCCAGAGGCTGTATACAATCAGCTGCCGCCTTTTTGCAGTGACTATAGTCTGACGGTTTCAAGTGCCTGGCAGCTCTGACATCACAGGATTTTGACGGACGTTCTCATATACCGTAAATCTCACTGGATCCTTAGTAGATCTCATTCAGGGTTTGAAAATAAGATAAAACAGGAACATTTCCTGGGGATATTTTTCACTACTGGGACTTAACTGTAAGTCTAGATGGTGTTTTGGAACACAGAATATCCAGATGAGTCATACTGGCATACAGGAGGACACACTGATGTTCCTGTTCTCTACCTCCAGTGATTTACTCCCAAGAGAGACTAAAAAA…
CLocus_8474	1	481	46.19	77.44	148	5716	TGCAGACTACTTGAGGTAAGAGGAGAACATTAAATGAATCGATATCATCACTAATTGCCTTGTGTTTCTGGTAATATTTGGTGTAATTGTTTATCTTCAGCACAGTAAGCGGTTTAGATTTTGTTCTAGTAGTTTTAAAAAGGTCGAGCTTCCGTATTAAGGTGGCTGGTACACAAACTCAAACTGTGACTGGATAACTTGTCAGTGTAATGGGAAAGGGGATATCGGTTGAACGCATCTACCGAAATTTGTCTTCCGCATTTAACCCCTCAATTAGAGAGGTGCGGGGTGGGGGCTGCCTTAATCGACGTCCACGTCAACAGCACCCGGAGAGCAATTGTTGTGAAGGTTAACTGCATTGCTCAAAGGCAGATTTCTCCACCTTGTCGGCTCAGTGAT…
CLocus_17782	1	482	46.19	78	19	12228	TGCAGGCCCCCTGGACCAGGTTTCACCTAGCTCTGATTTACAATGAACAGCATTCAGGGCCATACATACTCCTACAGTAGCACAGTGATACAGAGTAGTCTATGAGGTTGTTGTCAAAATAATACCTCTGTGGTATTCAACTTCTCATTTGTCATAAAAAATAATGATGTCATCCTTAATGAACGCTTGCTTTAAATAGACCTTTATGTGACCAAGGACTTTGGTTCTGTTCTGTGATGTCAGTGTTTGATGAGAAGTCTGTGGCGGTGCTCCAAATGGCACCCTATTCCATATGTAGTGCACTACTTTGACCAGAGCCCATAGGGATGTTTGAGATGTTTTTCTACATGGCCAAAAGTATATTCAAATTAGTGGATTCTGCTATTTCAGCCACACCTG…
CLocus_24380	1	483	46.19	78	252	16563	TGCAGTCCTCTTCATCTACCTGGGCTGCATAACCAATGCCATCACCTTCGGAGGCCTGCTGGGGGATGCCACAGACAACTATCAGGTAGAGCTGATGTAGCCTGAAATCCAGAACTGTTGTGTTAACATTCTACCCCTTGTAATCTGTGTCAAATGCCAATGAGTTTGGCATATTTACGGAGTAAAATGAGTGAAACGTTAGCACAAACAGACTGGTACCCAAGTTAGGGCTTATGACCCTTGAATTAATTAAAAATTAGTTAATTTACTGATTCAAATTGTAAAAATTCTGAGTCTGTGATTTGCTAAAGAATGTTTTTAGTATGGAACATGAGCCAAAAAAATGGTATGGTAGCTAACTCACTCTAGGTGATATATGTGTGTGACGGATGGGAACAG…
CLocus_13987	1	484	46.19	78	23	9681	TGCAGTTGTGTACTGTTTGAGCCACTGAGTGCCTACACTGAACTGGACTGATATGGAGGATCACACTGCTGACTGCTCTATGCCTCTTACCTGTGTAAACTGACCAGGCTTGACTGCTCTTCTGGTCTGGATCTCCTTAGTTAGCCCCACCATCAATGTCTACTTCCCCAGGCTGTTATCATTTGCTGTCTGCAACCGATGTGATGGTGGTGCAAGCCTGGGGGCAGGAGAGGCTTGAGTCAGTCTGTCTGCCTGGCTTCTTCTCTCCTAACTGGTGCTATGGGGCCGGTGCAGTTTTCTTCTGAACATGTGCCAGAGAGATATGTGCCTAATGCTTGTGGTACTCCTACAGCTTCTTTGTACCATCAATACAAACTGTGGTTTGCCTGCCCTGAGGTG…
CLocus_105137	1	485	46.19	78	9	60457	TGCAGTCTCTTCTTCAGAGGCCACACATTTATACCACTGGGAAAAAAATATTTGATGATTCCATTCTTTGGATTTCTCCTAATGCAAATACTTGTGAAAGTGGTTCTCATTAAGAACAATGGAATGCAAACAGTAGATGAAGGTGTCTGGGACCAAAACTATTCATGTTACTATGTTAATTTGCAAAACAAAGTTGTCATCACTCCCACACATGCACCTACACAACTGCATACGCAACAACCTCCCTCAATTCCCTGTGAGCACTGTCCCTTTCCAGACATTAGCCGATAAATAGAATTAGTAGAACAGACAAGCAGTAGTTCTTGAAGACTATTCTTAGTTCGAAGGTTTTAAAATAGCCTGAGCCTTTCCAGAGAACTTCTGATTCCAGCAACCTCT…
CLocus_60558	1	486	46.19	78	211	39137	TGCAGTCCACAGTGGAGCTCAGCTCAGCTGCCTGCCTGCTCTGCCTGCCTTTCTTCCTGCTCTGCCTCCCTGCCTGCCTCTCTGCCCAGGCAGGTCACCCGTGATACGAGTCAGTATTCAACGTCCATCCATGTCTGAGGACGTCGGAAGTTGATGTGGAATTCAGCAACTAGGGGCATCAGTGAGTGCTATTACCTTCAAGTAGGTTTTGGCCTTGCGGACAGGGATGGAGGATGGGTGCAAGCAAAGGTTGCATGTTCAAATCCAGTGATAGAAAGTTGTTTTCATATTTTTGCTTTAAGCCTGTCCCAAACCTTAACTCTTACCATAACCATTCAGAGTGAATGATTAACTTTTACAAATTAGGAGATAATGCCTAAACATAACCTTAACCACTTT…
CLocus_30194	1	487	46.19	78	155	20536	TGCAGAACGTCTTCGCCGGCGCTTCCGTCTGTACCCACGAGGCACCGGGACACCGATGTAGATGTTCTGCTGGTCTGTGGATGAACGGTAATGCTAAGTTAACAACAAAGTTGGGTACTGGGACACCAATGCAGTTGGACTAATGGTCTGGAAAAAAACGGTATTAAAGTTACATTAACATGAAACAGAACATCATTAAAAATCCATCAAACAAAGCCTAATAATAGTTGTACAGTACAATACCTAGAAGAGCCCAGCAACAACCAACACATAATAACTGAGTCCCATCACATCATTCATTAACCCCTGGTACACAAAGGAGCATTTCCATGAATGTTCAGTCATTGAAACAAACAATGAATAAATGATGATACAGTGTTCGTGTGTGTTTCTCTAATG…
CLocus_33603	1	488	46.19	78	90	22735	TGCAGCAGGAGGCCTTCAACATTAAAAGAACAATTTATCATCCATGCGATTTGAGAACTTCACTGAGTGGAACAGAGCAGTGGAGGAAGCTCACTGGACTTTCACACACCATTGCCTCTCTCTCTCTTTCTCTCCCTCATTTTTTTATTGTTAGCACGCTATGATCGGCGGGATCTATAGTTTAAAAAAATATCTTCTAGAGTTCATATATTTTCATTATACCATTTCGGAGCCTATGTATAGGGCCACGTTGTAATAGTTATTTGGTCTTTGCACACTGGATTCTGTATGTCTGTGTTTTCTGAAGTGCTTCCAGTCCTTCATCAACTTATTCAGATAGACAAACATGAAAAACAGACACCACTTTATGCATTTATGTTTTTATACAGTCTGGAATAG…
CLocus_84274	1	489	46.19	78.28	87	51493	TGCAGGAGAGTTCTCAGAATGTCTTCCTGATCATGATTCTATGTAACGCCTTCTATAACCCCCATGGTGTTCCTAGAAGGAGATAGCGATTAGAGAACCCATGCTGAGGTTCCTCCTGCTCTTGGAGCACTTACACACTGTACACACACACAGAATGTAAGGTCAGTAGGTTGATCTCATCCTGAAATCTTAACTATTGATCAGCTGATGTGGCATTATAGACCACGCACTGGGTGATACTGTGACTGCCGCTGAAACGCGTCACAAAGACATGAGCTGAATGATTTGACTACTGGTAATACTGTAGAACTCACTACTGTCTCTATTGTAAATCCTCAGCTCAATGTACTGTGCTTCTGTCATAACAATGGAGACAGAGAGAGCTAAAGTGCTTCTGAC…
CLocus_12394	1	490	46.19	78.28	299	8493	TGCAGCACCTCAGGGTTGAGGAAAGTCTGGACGATATTGTAAACCACAGCAGCTGCTCCCCGTGCCGCAAATCTGTTTACAAATTGACAGTTGAGAGAATAATGAAAGCTGGCCATGAGGGAAATTAGGATTAGAAAAAATAACCACACTTTTATTTAATCAGATCACTCCCCCTTATGCAACACCTGAGACCTGGATATCCAGAGAGGATGCAGGAGGTGAATAGAAAAATTATCAACTTTGTTTATTTGGGGTATCCTTTCTCTTGAGAATATCTATACTGATGGTACGTTTTTTTAAAATTTGTCTGTTAATTCAGATATCCTTGACCAACCCTTTTACTTTAGCTTAGTGTAAAGCCCTCTGTGCTTTTTGTTTGAGTCTGTGCAATAGCCCACT…
CLocus_23316	1	491	46.19	79.42	73	15951	TGCAGACAAAGGGAAAGAATGTGCTGAGCAGAGCAAGGCTAGGAGAAGGGATGGAGGGGGAGGTGGAGAGAGAGGGGGGAGCACAGTGTGGACCAGAGCTAGACTAGCATGATTATGGCTGGATTGACATAGTCCTCTCCTCCTT
CLocus_29720	1	492	46.19	79.98	8	20163	TGCAGCTCGGGACAGTGCTCGGCAAACGCCCTCACCGACTTATCAGTCACCTGACAGAGGAGAGAGGGAGCGGAAGGGTTAACATTTCAACGTGCTGGAGCTTTTTCAAAGAGAAAGTCGACCAAAACATTTGGAAGCATTTTGGAGTTACCCTCGCGCACCAGCTGTGTGTCTGACAACACTAATGTTGGTGTGCCTAGAAGCCTGACACGAAGAGTTAGTACTGTATCTAGTAAGTATTTCTGTCTCTGCTTTTTCAACAGAAACATACTTTTTTTTAAATAATTAATTTAGAGGTCAAAACCTGGTGTCCTGGTCTTTTGTGTGTGATTAGCTCCATTCTATATTTAATGCCCATCAGATATTCTGTCACTGCACTCTCCCTATCACTGTGTCAAC…
CLocus_46305	1	493	46.19	79.98	129	30582	TGCAGACGCACCAGGTGATTCCCTAGTGGTGGAGAGGGAAAGAGAGGACTGGGAGAGGGAACAGCAGGAGGAAGAGAGGGAGAGGGAGGAGGAGACGGCTCAACATCGCTCCCAACGCTCCGTCAGCAGAGATAGGTGCACAGCATTGTTTCTCCTACCATTGTATAGGCGGGTCGGGTGGCAGAAAAGAGTTTGGCTTCTATTGACACATTTTATGCCAGTAGGAATCAAACTAGGCGACTGGTGCATCTTTTTTCCCCCTGGAATTCTTTGAAAATGAGGCATTTTTTGGAATGTGTTGATTTTCCGACATTCTGGACTCCCTGACGGGCCACCCCCCCAGGTGGTAAGGGTAGGTAACAACACATCCGCCACGCTGATCCTCAACACGGGGGTCCC…
CLocus_39152	1	494	46.19	79.98	228	26139	TGCAGCTGGTGACATGACAACTTTTCCCAGTATGTTGCTGTGTCTAAGTTCTTTAAAACAGATTATAGGATAAGATGCTGCTAGGGTGTGTTTTTGTTGGCTCGGCAACTGGCAGCACTGGTGTCTCGGGATACTGGGTTTATTAATCTTCCGTCATTCATCAAAGAAAATGCTGCATATTTAACATTTTAAAGCCTGCTAAGAGATTAATTAAGGCAAATAAGATCAAACTGAGGATGTGCGTATTGCGGTGTGTTTTTACAGAATATTGCACTCAGTAGTACACACGAACTCTGCATTTACAAATGAGATTACTCTCATTGCTCTCATTTCTCTCCCTATTCCCCTTCTTCCAAAAACAGTAGTCTACATGCCCCTTGCAACAAGTGCTGTGTGTGA…
CLocus_31119	1	495	46.19	79.98	7	21167	TGCAGTTGACGTAGCCTATGTCGGCCTGACGTCGCCTAGCAAGCCAATCGCAGAATGTGACGACAGAACTGAGGCAAAATCGTACAAATCTGGCCAGGTTGATATCAAGATTTCACATTTGGTCCAGGAACATCGCGCGGTGACTGAAGATGTAATCGTAAAAGACTGAATCCGAGGTACAGTCTGCAAAGGCCTTTAGCAGACTGGTAGAGGAAGGGGTTTAGAGATGTACACTTTAAAGTGGACAGATTCACTGCGATGTGATCGGAGATGTAGTGTGGCTTATGGATTCTCCTTTTGGAGTAAACAGGTGCTCCATCTCGCCAAGGGGTTGAGTTTGATGAAGACTCCATGTAGACCAGTCATCGATAGCGTTGTGTATCGCGTATATAGGGCATA…
CLocus_40019	1	496	46.19	79.98	240	26685	TGCAGATTACGATTCCTATTCAGACTACAGTAAGGTCAAAGTGAGAGGCCAGCGTATTTGGCAATGCTACAGGCACAGAGGGGAGTGCTTGGAGTTGTATTAATTTGACAGGGGAGCAGAGACAAAAGCCTCATACGTTTCTGTGGTTTTCCCATGCTCTCCTACCCTACCCCATCACTGGAGTATTTCACAGACCCAATGCAGAGATTAAACATAAAAGTGAGAGGAAAAAGGTCAATGAAAGTATGCGGGATTGCTGAAAAGTTTCTCAACACCTTAAAAATGGCTGTTCTTAGACTACAGCACCATAACGCACAGCATTCCATTTTCCCTCAAAACATTTCTTCCATCTTTGCAAATGTGATCATTACTATATCTGATTCAGCGTCGTTTCCACGA…
CLocus_44619	1	497	46.19	79.98	65	29581	TGCAGCTCCGAATAAACAAACCCTGTGCTGCCTTAGCACCTCTGTACCATCCGTGTCTCATGTCGGTCTGTGTAGCAAATGCAAGAGTCAGGGCATTCTCATACGGATGAATCGATACAAGAGTAATTCGTTTCATAATAGAACATTTCCACACGATTATTGATACCATTTTCACTTTATGGGCTGGTTTCATAGTCCCAGATAATAGTAATCCAAAAGCAGGCCAAATTCAGTATAAATACATTTGAACGATTGATTGAAAGGAAAGTTTTTGCTATGAGTTGAATTTGTCTAAAATTATACCAGTCTCCAGTGGTAGCTAGCGTCACAAGGCTAGCTATCGAGACCTAGTTAGCCCACGCTGCAAGACTTAAGATAACTTGGTTAGCTTGTTGGAAA…
CLocus_103798	1	498	46.19	80.26	197	59990	TGCAGATTGTATTTAAGTATTTGATCATTGTTGTTAGGAACATTTAACCACAGTTCCAAAAAAATACACATTTGAGAAAAACTGTAATAAAATACATGTTTTCCCATCTCAAGAGGTTAAATAAATAGAAATACTATTGTAAGTGCCTATTAACTACCAAATAAAGTAACAGGGTTGACCGTAACAGGGTTGACTACTTCATCTTTAATCATCCATAAATCTTGGAATGGAAGCTTGTTGTGTGCAACAGGGAGGGGCAATTGAATGTTAAATCATTTCTAGCCTGTCTAGCTATGGGTAGCAGAGTTGACTTACTTGACCTGCTCAGTTTTCCACCACAAAACACCCAAATATTGCCAAAAAGAGTAGAACCAGTTCACCTGCATTTACAATTTGATT…
CLocus_68201	1	499	46.19	82.85	211	43226	TGCAGGTGTGTTTTTGCTCTAATGCCTGTGTTTGGTGTTCATTGTGGTTGCCACAGGTATTTCAATGTGACGCTGCCAATGTTCCATTGGTTCAGTTGGTTAAAGCATCTGCCAAAATGACCACAGTATGTTAATGGTTGGGACTCTTTGCATTTTATCTTCTGCGGTCTTCGTCTGTGGTGTTTGATGGAAGGGCATGCCCATGTTAACATTACACTGTGTTGGTTTGTTGCAGGTATTTCTTTGCTGTGCTGGCCATCCTGACAGTTCTGGGGGTGCTGAATGGTTTGGTCCTTCTTCCTGTGTTGCTGTCCTACTTCGGCCCCTATCCAGAGGTCAGATGGTTTCTCCTGTTTAGCCATCTATATAGCTCCACCACATAGCAGGAAATGGCACGCT…
CLocus_70085	1	500	46.19	82.85	54	44150	TGCAGAGTGGGTGGGTTACAGAGAGCTGTGTTTAATATTGCTCAGTGAGATGGCTGGACAAATTGGACCCAGACAGCGAGCAAGGGGAGACCCAAAACACTATCCCAGGAACAGGCTACCGGCCAGGGGGAACGGAGAGGGGAGTGCAGGAGGCCAAGAGGAGAGAAACACAGAAAAGAGAGAGAGCAATGAAACAATTAGTAATTGAGAGGTAGAGATAGAGAGCATGACGGAAAGAAGTTAAGAAACAGAGGTAGAGAGATATATTCTCGGCCTGTTCTACCTGAAAGCGTGTCGGAGTTGGATACTGAGTTTGTCCTTGCTCTTATACAATGCACTAACCAGCACAGTGTGTACCACGTACCAACGTCTTTTAAGGCGTTTAAGTGAGGTCTCATA…
CLocus_109515	1	501	46.19	83.13	295	62289	TGCAGTACTAAACTACGGACCGAGCAGGATGAACCCTTACCATGAGCATAGCAGGTGACGAAAGGCAGCATGAGATCACCCATGCAACTCCACTCAATTCCGATGAGAGATCCGCTATGGTGTGTGTCTTAATGGCCAGAGCTCCCCGGTGGGTTCACGGAGAGGTTGCATACAGAGGAACGGATCCAAATTAAACATAAACAGACGTCCTCTCTCTCTCTTTCTTCTCCTCCTCTCCTCGTACCTTCCTTTCTCTCCTCCTCTCGCCTCCTCCTTTCTCCTTCTTTGCTCTCACGTCGATGTTGGGCCACAGTTTCCCCTGTGCTGAGCCGAGCCCCGAACAGCCCTCCGCTGACCAGGCAGTACTAATCTATCCCTCAGCTGTGCAGTCTAATCTAA…
CLocus_57277	1	502	46.19	83.98	235	37283	TGCAGCAGACCCCAAAAGTTGCCTGCAAGTGAGGCTGTGATGGAACAAGGCTTTACGCCCTAGAGGGGCTGGCAATGGAAACAAACTGTAATCGTCAGATTCCAGCAATATAAATACTTCAACCCACGACAAGAAAAGGCATGCGGATACACGCTTAGGCTGGGTGTGAAGGTTAGAGTGAGAGTGCCTTGTTGGCTTTACTGATGATTCAGTGCTATAGGGTATTCTGTTGATAGGGCCAATGTATTAACAGAGCAGTTGAAAAGCCTCTTTCCCTTTTTTGGGGGGTGATTTGTCTTCCCTTACTGCATATACAGTATCAGGAAGTAGCTTTGATGACTCAATGAACCGGACCAGCAATGTGTCAGTCAGTAAGCCCACAGTTGCCTTTACAACACA…
CLocus_36346	1	503	46.19	83.98	7	24366	TGCAGTCGGATGAAACACTTATGTTGGTACACTTTCACTGATTTTTCCTCAAGGAATAAGGGCTCTATTAAATCTGTAAAGCTGAAGCGTTACATAGTTTGCCATAGAAATCAAAACTGTATTGGTCTAAACATGTTAAAAACTATGATGAAAACCATTTAAAAATGTTCAGCCGAGTCCCATGGGTAAATTTAAAGGAAGTAAACCAGATACAGCAGGCTAATTTCCTCACACTGTGACACTTGATGGCCTCACTACTCACTCAAAAACAGTACCCAGTTCCTTCTAATTTCTTCAGATGGAGAAAAAAAAATCTGACTCAGTGATGTTCTTACTATTTTTAACAATTGTTGCTGTGTATTTGTGTGGTATATGTTGCTGTTTTCGCTGATGGTCTGG…
CLocus_39296	1	504	46.19	83.98	189	26198	TGCAGGTAGGATGATGCAGAGCAGGAGCAGAGTTTTCAGAAAGCGCCCATGTGGCCCCTGTGACACATCATGCAAATCCAAATAGATGCCCACGACTTTATAGGGAAAATTTATGCGAATAACACAGAATTTTGAGGAGACTGTATCCAAAAACACCACATGGCACCATATGCTAGTTGAGTACAGAGCCAAAAATATGGTTTCAAAATGTTAACACAGTAATACTTGTGAGGAATAGTTTTATTAAAGGTGTTCAAGGCACTAGACAGACATTGTTAAATGCCCATAGATCCTAAACTAATATGAATTTGACTGAAACTGGTGTTTGCACTAGAACTGTCACTATCAATATAAATTGATCTTTTAACCTCAATTTCATTCTTCAGGTTTCATCAGACT…
CLocus_52496	1	505	46.19	83.98	146	34353	TGCAGTCTTTGGCTTGTTCAGTCTCAAGTTAAATATGGTTTTAATAATGAGCACTTGGACTTCTCTACACACTTCACCATGTTAACTTGTGTGTATACTTTATTGTGTCGAGCATGACCTGCATGCTTATACGATCATTTAAAACGATGCAAATATGATCAAATGTGATAGGATAAAAATCCTTTGAACAGTCAAGTAAGGCGAGCTATGAAAAGTATTGGCTAAATGGGGGATGAGTAAAGCTGTAATGGAAGCGTGTTCAAGGATGGGGGATGGGGCACACTCACACAAAACACACACAGCCCTCGAGCAACCAGATATGTTGGAGATTTTGTTCTCTTTTGAATAGTTAATGAGCTTAGCATGAATGTGCGGGATGAGACGAACGGTACAGTGGTT…
CLocus_3780	1	506	46.19	83.98	362	2751	TGCAGTGCTCATACAGGCATCTATGTTGGTCTACAGACCTTTTTTGGCTTAAAAAGGAACAGAGCGTTCCCTATTTGAGCCAGTGACATTGAAGCTCAGCAAAGCTATGCCATACAGACACTGCTGCTGATAGATGTGAATTAGAAAATAACTGTTGGTGGATTAGTGATAAAAAAACCTAGGGACTCATTTTAGATAAAGAATATGAGCAAATACTCCAGGACACAACTCATTAACAACGGAATACTACACAGAGGAGCTACCCGTCATATTTATCTTCACAATTCAATTCAACAGTGGTTTCCAAATTGAACAATCCTTGGACAGTTGAATTTAAGTGACCTATAACAGCATGAGTGTTTTTTTAATTCAATATCATTCACAGTCTATTACCATTTA…
CLocus_11399	1	507	46.19	83.98	16	7732	TGCAGCAGATGACACGGGATGAGTTTAGAATTCTCAAACAATATGACAGAAGCATCTTCAATTTGATTGGCTGTTCCATGCAATTTTAATCGCATTTGAGTTGCTTCATGTAACAGCAAAGTTACTTGAGATGATGTCACCTAAAATTGCATGATAGTTGCTTTGTGTAACCCCAGGCTTAGGCAACAGTCTCAATAAAGGTATTACCGTTATAAATTGGACACAGCAGAATGCACAACATTAGTTATAATTTATGAGTGTTTCTTCCGACATGTTTGTCTTAACTATGGTATTCATACCACAACAGTATAGAGAGAGATTCAGTATTGCGTGCTGGACAACACGTGGGACCAAATACCTAACTTTGAGAGAGTCCTCTTAAACAAAGACAAGCGACGA…
CLocus_40803	1	508	46.19	83.98	70	27150	TGCAGGTGGGCAGTGGTGGTGACACAGCATGGTGATGCTGGTCATGGTGCTTCTGATGGTGGCTGCTCATTCTCTGGGAATGCGATCTTCTACCCTACCATTTACTCCACGTACCCAGATGCTCAACTGGAACACACGGCAATTGGCCTGTTCAAAGCATAAGCAAAGTATAAATGATTTAGAAAATCAGGGCGCGTATTCATAAAGCGCCAAAAAGCAGGAGTGCTGATCTTGGATCAAGTCCCCCGTCCATGTAATCATATTCATTGTGATGTAAATTGAAAAACGGATCCTAGGTCAGCATTCCTAATATGAGATGCTTTAGGAATACGGGCCCTGTTCTGCATCTTCCCACAGGTTACATATCCTGTCCTCTTCTGACATGATGTGTTCTGCTGG…
CLocus_21225	1	509	46.19	83.98	275	14529	TGCAGTACTAATGCAGTCCTCACAGTTGTTACATTATGAATTCACCTTTCTGTAACACCAATCAGAGAGACATTTTTCAATATTCAACAACTAGCTTATTGTATTTTTTCATTCCTTGCCGTGCAAAACAAAAACTTGCCGTAGGATTTCTGCATTTGATAGACTTTTAATCTGTAAATGTGTCAATAATTTTATCAGAATTACACAATATGTAACTGAGTTAATAGCATCTGCCTATTGTAACACTAACACAAACGGCACTTCAAATAAAAATGTAGATATTCTCTGCTACAGACCCACTGTAGCATACCTTATAGTGTTGTAGGAAAATGTCACTAGTAAAGCAATTGTCAAAGGGGTTGAAATCTATAAGGAAGAAAGTACTTAACGGGAATATAT…
CLocus_15913	1	510	46.19	83.98	39	10994	TGCAGCTGTATATTACATTTTTGTATTTATTATTATTTCGTTTAATAAATGTATTCCTTTTTATGTTTAAGTAATCCGTGGTCTACCTTTGTTGTTGTGAACTATGAGCGTGGTCGTGACACTATGTAACACCTGCCGCCTATAGGGTTACCTAAAATGGCACAACTACCAGACTACGGCAGTTCCTGTTTACTGTGAGGGAACACCTCAACCATAGGAAGACCGGTTCGTGACAGGCCACCTATTGAGTTGGATCATTACTTCTGAGCATTAGAATGGATCAGTCAACACTTAAGTTAAAAATATAGAATTTTATTACAAGTTTGTCTTTAAATTACAAGATTAAAACCACTGGCACTTTCTGTTAGCCAGTTCCAACAGTCATCAATCAATAATACA…
CLocus_16828	1	511	46.19	83.98	90	11597	TGCAGAAAAGTAACATTTATACTTTCCTCCCTCATCTTTCCCTCCAATCACAGAGGAGATAGAGAAGAAGCTGACGGCCTACAGGAAAGGCTGTAAGATCTGGAACATGCTCATCTTCTGTCAGGTGAGAGAGAGGAAGGGGAGATGGTTTAGACAATATTGTGTGTTTGCGTGTGTGAGCTGGAGAATGGGTTCTTGTTGTCTCAAACTCAGCGTTTAAGTCAGCTTATTGCTGCTGCGGTTATTGTTGCACGCACATAACTGGAATTAACCTGTTCTCCAGGGAGGTCCGGGGCATCTGTACCTGCTCAAGAACAAAGTGGCCACGTTTGCCAAGGTGGAGAAGGAGGAGGACATGATCCAGTAAGATCACTCACTTCTGACAACAATATCACCATG…
CLocus_30294	1	512	46.19	85.11	101	20613	TGCAGTCAGCCAGCCTTCCCTCTACAGTAATCATCCCCTGTCTTTCTGAAACGGTTGATCTAGCTATCCTACTGGGCTCTGGCATCGTATGCTACATATACAGTAGCGCTGCTCTCTATCATTGTAGTAATAATGATCTATTTAGCATAAAAAAACATATTTTAATGGTACTATTCTAATGCTAATTTTGAAATGGATGCTATTCTCTCTTATTTGGTGAAATCAGGGTAAATGAAATCCACTCACAGTGGGTGTCTATACATGTGGTGTTCCAGTTTTTCTGTTCCCCCCATACAACAACAATCTGTTCTCACAGCTACAGAAGTGCCAGGGTGAGTGAAGTGCATCCCTGAATCCTTGCGTCCCTGGGCTCAGCCCGTCCGCCAGCCAGCCAGCCCG…
CLocus_86030	1	513	46.19	85.39	163	52406	TGCAGTATATCAAGTCAATGTAGGCTATAAATCCAAAGACAAAACTGGGTCTTCTTTACTACCCTTCTTTACTACCACTGCTTTTAATGAAACTCTCAGTGAAGCACTCACCAGTTCTCCACCGGACAAACGTGATGGTTCATCACAGCCATGGCGTAGCTGTGGGGGAAAACAAGCACAAATCAACAATGATTCAAACCCACAATCATGAATTTCTTATGAATATTTCTCTTTCAATCACTTTGTGATACATGCATGGCCGCCAGGACTCACACTATCCATATCCCTGTGATGGAGAAGGCAGAGAGGCTGACAGGCAGGACGATCCAGGCAGTCATTGGGCTGGCAATGTGCCGGCTTTGTCCAAAGCATGAGGGAAAGGAGGGCTTCAGGCTGGAG…
CLocus_45226	1	514	46.19	85.95	127	29959	TGCAGGGGGAGAGAGAGGAATAGGTTAGGCCTATTTTACTTAGCTCAATGGACATTTGTCGATTGTGATGTCTCTAAATAGTGTTTTCTTAACCCCATGTTGGCTCGTCAACGCAAGGGTCAGTTAATTAGCCATGAATGAGCATAATTCTTATGGAAGTCCATAGATTTTCCGCACTATAGGCATACCATTTTACGCACAACCAAATGTATCCAATTACGCACGGATTAAAATTATGTAGAATCAAAAAAATGAACTAGACCTATATAATTACCCAGAGCTATCCAACACAAATGGAAAAAAAAATCTTCCGCGGAAACTATTTTGGCGCACAAGACCTACACATGTGCAGGTATAGTTATTTTGAATCATGCTCTCTTTAAAGTCATTTGAAAGCAG…
CLocus_82436	1	515	46.19	85.95	16	50502	TGCAGAGTGCGTTTCCTGTTGAAGCACAATTGGCATGAAGGTGATTAGCCCTCGCTGCTCCATGGGGTGTGATATCTGTTCCCTTCCAGACCTTAGAACAGGTGGATACCGCTAGAGAGAGAGGAAAGAGAACAACTGGAGCCGCGTGGCTGAAAGACTTTTAAGTCCTCCTGGACTTCCCAAACACTACAACTGATCTTCAACTCAAGATGACGGTCACAGTTTCAACATCACATTGAGAGCCTGTTATTTACATTGATTGGAGACTGAATCAACAGGTTTCTATCTGTTTGTCCCTCTGTCCTTTTGCAACAGGCAGTAGTTGGAGATACCTAATTGTTATTGTGAAAGCCCCCGTAGTGTGCGAGTCAGTCCTCCACAGCTCCAGAGTTAGTCTAG…
CLocus_35316	1	516	46.19	85.95	216	23770	TGCAGTTTGCTTTTGTACACAGGAACCAGGTAATTTAGAAAACAAATGTTTTATTTGTTTTGGTATGTATGTACATTCCACCGTTGTGAGGAAGGCAGGAGTGAAGGATTTAAATTATCTACACACAATAGACGTAGAGGGGAAAAAAGGACAGATTAAACAAAGTACAGGTAAATGTTTAAAACACTTCAGGTAATAAAATAGATGAGTAATTTTAAAAAAAGGGCCACTTATTATACATTTGAGAAATAACATCTTTCACAGGCTCAAAATCTAAATGTGAGGGTGCCTTTGCTTGACATGAATGGCCCATAATTCATCGTATACATAGAAAAGGTGAAATTAAGCAGATTGAAAAGGAAATAACTCTGTCCCATTGTCTATCCCTTTTCATTGACC…
CLocus_67714	1	517	46.19	86.23	192	42984	TGCAGGGCTCTGGGACATCTGCAATGCAGAAGTCTATATAAATAGCGGTGGAGAAAGGGTGCCAGAGAAACTGAAAGAGAGGGGGGGGAGAACGAGAGAGAGAAAGAAAGAAAGAAATAGAGAGAGAGAGAGAAAGAGAAAGAAAGAAAGATAGAGCGAGAGATAGAGAGAGAGAGAAAGAAAGAGAGAGAGAGGCTGAGAAGAGGGTGTGCAAGAGGAGCCGCTGAATTGTGGATACATGAAAACTATTATTGTGCAGAAAAAGCAAGAAGACTCTTGGAGGAATACGTTTTTGCTGTAATTTTACCCTCAATTTGCCCATTTTCTTTTTTGACCTGCTGTTTTCTCCATCATCAATATGTTGCTAAAGAAAAGTTAAGAAATCCCTTGGACCATTTG…
CLocus_64286	1	518	46.19	86.23	154	41216	TGCAGTAGCTTCTCCTCAAGGCAGACTAGCGAACTCTTATGACATCACCCAGCCACCGAATGGGGGAAGAAGGGAACAGCTCTCTGCGGATGAACGATGTTTTAATAGAAGTGGACGTGTTTGGGCATATCAATTGAATTCGTGCAAGGGAAACGTTTTTAAAGTTGTTATAATCTTCAGAAAGATTCCGTGGGAATAGTTGGCTTTGAAAACAGCGGAGTTACCCATAGCCTACTTCGCCGAAAGGTCCCTGAATAAGCTACCAACGAATGTTAGAGGCGAAATGTAAAACTATAACTATTGTAGCGTATGTTCTTGCGCATTGTGTCTTGTCTCCTGCTTTCTGGAATAGAGCATAAAGGAAGCAGAGGAGAGACGGCTTTTCTCGACTTCATTTCT…
CLocus_117607	1	519	46.19	86.23	208	65041	TGCAGACCCTACTGAGTACTCCCAATCCACGTTTACATCGGCACATAGTCGTTTTTTTTTTCTCTATAAGCCAATATGTAATTAATATGCAGTGTATTGCATTGCAGTGAATGGGGTGGGTGGAGTAAGGATTCACCAGCATTCTTTATTAAACCCGTTGCCCAGCATAATAGACCAATTTAAGTTTGTAGACTCTATTGAGTAATTCCAATTACTTATATTTTATAAGTGTATTTATTTTCCCTTAGCCTACACATTGGCCGTGTTCGAGAGGATCAAAATCGTAATTTATCATGGGTAAATTGTGACTGACTGACTGATCTACAAATAATAATGAGACGTTATTTATGATAGAAGGTGATTTGTAGACCAGTCAGTCGGCAGTTGCCTGCAATGTCA…
CLocus_19963	1	520	46.19	86.23	90	13753	TGCAGAGCAGAGGCGACAGAAATGGAGAATCTGGGTGTTGACTCAGCTGGAGCAGTGAGAGGGGAGAAAGATAGATGGAGAGTGAGATTGATGAGAGTACTTGGATGGAAAGAATAGTGAGGCTTTTGATGAACGAGTGTAAATAGCGACAGCGGAATTAATTCCTCCCTGTGGACAAGATTGAAAGTTTTGCCCTCAGTTTGACCTCTGGTTCTAGGCCCCTCTCTAATACACTAGCGTGAGGCTGATCTGTCACAAGTATTTTAAGGGCCAGTGCCAGCTTCACCCAGGACATTAACATCATATTTAAACTCTTACTACTACATTTACACAGGGACCCAGATATATCCTTCAAAGTCAATAGCCATGTACAACATGGCAAAGAGTAATAAATAGTAC…
CLocus_45736	1	521	46.19	87.08	17	30255	TGCAGTGGGTGTAGAGCAATGGCCTATAGTTCTAGTGGACGTGCATCCAACTCACAGTAGGCCCGAGACAATACATTTAATTGGACAACAGAACGTAGGAATACAATCCATTGACACCCCCTGTAAACTCGGTGAAAATGTTGCTCGTTTTTCTTCTTCCTTTTATAGGTATGCTTTCCACAGCTCCTCGTGGCTGGTGGCGGGTAAAGCTGACCCTGCTACTCCGGGGAGAGTTCACTACCACCCCGACTCTCCAGCCAAGGGCGCACAGTGGATGAAGCAGATAGTCTCATTCGATAAACTAAAACTCACTAACAATTTACTGGATGACAATGGACATGTAAGTATATTGCAGCGAAGACCCTGGTTTACTAAATAACATGTGTTTCCATGAGTACG…
CLocus_48909	1	522	46.19	87.08	353	32184	TGCAGTTCTTTGCTCTTGCTCTGTCTCAGGTCCCAGACCTGAGGTGACACAGAGGGCATAGTCGGAGGGGAGGGTTAGGGAGGCGTAGGGTTGTGGTGAGTGTAGAGAGCGAGAGCACGCATCACTGAGGGGGGTGGAGGGCATTGATTTTTACAGCAGTGATGGCTATTTATGGCACCGCAGACGGTTTAACATCTAATCAGATCACAAGGAGTATTCTGCATGAGGGGGATGTCTCGTAATTGCATCAGGGGCCCCTTTGTATTGAAGTTGAGCTCAAATACCTTAATAATAATAATAAGGACACTGTAAAGCAAAGACAATCAAACATGCAACAACAAACAATGTATTTAAAAAAAAAAACAAAGCTACACACATGAAGAAATATACTATGTACAG…
CLocus_76159	1	523	46.19	87.36	53	47436	TGCAGTGCTACAGGCAAGGATATCGCTGGACCTTTTAAAACGGGCTGCACTTGACTTGAACATATGGGGAGCTAATGTTAGCAACACACCGCCATGCAGGGGCTGGGGAAGGTTCTCTCCCTATTCGTTTCCTTTAACCCCCTTTCTATATATTTCTCCCTCTAGCTCCCTCTCCCTCTCTAGCCCTCTCTCTCTTGCCTTCTCTTTATCTCTCCCCCCTCTCTCTATTTCGCTCACAGTGTAGCCCTCCCCCTAGGTGTTACGTTGTTGCACCATAGTTGTTTTATTCTCTAATATTTTCCCTCCCTGTACTGCTGTACTGTTTGTTGTCTGTCTGTGTGTCTTTGATGGATGGGTTGTAGACAGACTCCTCCCCAAAATGTTCCAACTGAAAGTTAC…
CLocus_18035	1	524	46.19	87.64	56	12422	TGCAGGTCCAGATATGCATCTAAATGTGTCTGTCCGGCCAGGCCTGGCCACATGCGGAGAGGCTAGCTGCTCTGTTCCTAAACCTTCCCTGAAGTCACACGTAATCCGACTAATGGTCAGTGTCTGTCTGAGCCCTAGAGAGGATGTAGGGACTGGAAACTAACTGGCCACTGTGTGACTGGGCTGAAGGCAGGCTCAGAGAAACAGATTAGTCCATCCCTATGACGTGTGGTCAGTTGGAGTTCCTCCTGGACAGAGACATTGACAATAGGTCGGTCAGGGTCACAGCTGAGGGATATTATTGTCTTGCTTGACAAAGGTATCATATAAACAGACATCCCTTTTAACCCACGGCCCAGAAGCTATTAGGAGCGATTACATTTCGGAACATTGGAAACA…
CLocus_114467	1	525	46.19	87.92	188	64104	TGCAGCGGAGGAAGTTGTTCCTCGGCTCCAGCCAGGAAAAGGGTCTTGGGGGGGTTTGTTATTCTTGTTGTCCGATAGCATCTACGCTGTACGTGGGTACCTCTAGGCCCTGCCGAGAAGCGGGGTTATTGTGTTACCCAGGCAGGGAGTGAGAAGGTGGGGAGGAGAGGGGGAAGACGAGGGAGGCAGAGAGCCTCGACCAGGTCCCGGGGTGCTTGGTGCTCACCATCGCCATGGAGATGGGGCGACGAGATGGGCAAGCGTTGACAGCATCAGTCAACCGTACCCCAGGAAGTGGCAGAATTGACAACCAGTGCCCCAGGTGGCTGACGGGATGCCTTCCTATCCCCTGCCAAAAGACAAGCCTCCATCGCTCCCCATCTCCTCCTCCTCCCAGCT…
CLocus_15266	1	526	46.19	88.77	215	10527	TGCAGAATGAATGCAGAGGGAGGAACAGAACGGGGGGGGGGGATACATTTCTACTTAATCTCTGAATCGATCGCTGTGGTCAATGGCAACGCTAATGTGCTCCTGCAGGACAAGTGGCACATCACGTCAATCCCCTGCTAATCCCATATAGGCTACCTCCGGATATGTTTATCTTTTCAGGGTCCCTCTGATGCACTTGAAGATTGGCTTTTTCCGAGGCGGGACATTCATTCCTTACTCTGTGTTTTCTTGAGTTCGAGTACTGGGCTACGTAAGTGGTGCATAGAGGAAAATCTGGATTTCAGCATGACGTCAATGAGCGTCGGATTCTTCTTACCTTCTGACCGATGCATCACCATTGACTCCACGACCGTAGCTCCCCACGACGGGGAGTAAACA…
CLocus_55173	1	527	46.19	89.05	110	36025	TGCAGACAATGAAGTGGGAATGCTTGTGAAGTGTGACTTTAGTGTGTGCAGGTGTCATATATAATTGTGCCATATGTGAGAAATAACAAACAACGTTTTCGTAAAAAAAATCCCAGCCAATGAATCAGAATGAACAAATCAGCCCTGGAGACATTGGAATCATATCAGATGTTGCTTTTTTGTAGGATTGCGTTTCCATTAGTAGTTAGCTGGTTCCGTCACAGTGGGGGGGGAGGAGACTGTGAGCTCCTGTTGTGAGGCTATCAGACCGACCTCCCCTTGTGTTACAGCCAGGTTTTTAAATTAGACTCATCGTTTCTTGAAAGTCAGAGGTAGCCTCTGTGTCTCGCAGCCAGCCCATCAACATGTCCAGTCAACCAAGTTTTATCCGGACTCACT…
CLocus_46325	1	528	46.19	89.05	187	30590	TGCAGCTAATCCCTGTGAGATGACTGTCAAATGTTCAGAAGAACAGAACCCCCCCTTGGCTTTAGATACTTGGCTACTGCACTGTATTTCATTTAGGATTTGTTAGAAATTTGCTAAATGAAATGAACAAGCTAAGATACTGGCAGTATTGGCAAATCTATGAAAAACTGTTTCCTTCAGTGATTTGTGTATTATTGTTATGTCACCATTTTACATTTAGAAGGGGTTAACATCCAGTAACCCTGGTTTCAGAGAATGATCCTGAATGTGAATAAAAAGCGATATAATGCAGGTATTAGGTCCAAACTTTATTCCGTACATGAATGTTCGTTTTCATTTTTTTGCACGCCTAAAACTCTACTTGTTTTGTATACAAGTCTAAGAAAAACAACTGCACAA…
CLocus_21351	1	529	46.19	89.05	240	14652	TGCAGATGATTTGATACACATAATTCATCAAATCACAAAGGTGTTTTTTGTTTCATTTTTAGTTGTGGAAGACCGATCACACCGAATCAAAATGTAAGACGATGGTTCATCAGACTTTGGTATAGGCCTGATACAGTACTTCCTGGCTTGGGTTCTCTTCCCGGTGGCTCAAGTCTGTTTTAGGTCATAATACATTCCTTCAAACTGAAACTAAAGCATGTAGAAAATGTATAGTGCAAAAGTAATGATGCTGTATCAGGTGTGCTCACCATCCTAACCTGTACCCACTGAGTTGACCCTGCCCCTTAGGTGCATCGACGTGCCAGTGCATCTGTAAATACATGTACAGGATGGAATGTTGCTTTTCATTTGCACTCAAATGGTTTGAGATGTTTCCTC…
CLocus_20821	1	530	46.19	89.05	162	14314	TGCAGCTGGACTGTGGTGTTGGAAGAGGGAGCTGAACTAACTGTGAAAGGGAGTGGGTCTAGCTACAGCAGCTATAGCACAGGGGCTTAACCACTCAGACTCATAGAGGAGATAATCCATACTTCATCTGTATCAGTGCTGCCTACCACACTCCCCTACCCACCGCCTCCCTGACCCAGCCAAACCTCAGCCTCCCGCAGAGCTACACAACAGACTCCGAATGAATAGTGCAAGACTTTGAAAATAAAGATTTGCGAAGTGCATACCCAAACCCAGTGTAAAATATCTTTCATATCCAATGCCTGGGGACCTGGGAGCTCTACTGAGCTGGGGAAAAGCTCTATTAGACATCGCTATTCAAAGACGACCTTTATTCACAGCCAGGCAGCAGCTCAGCAG…
CLocus_21336	1	531	46.19	89.05	253	14634	TGCAGTCAGACTTGGCTCTGGGTTGCATTCCACGCTGACAGTTCTCACTGAATATGCTCTGTCAAACACAGACAGGCTAACCAGCATGAGGATAAATCACTTCTATAGAGCTCCAGATTTCAGTAAACAGATTGAAGAAGAGGAGAAGAGAGGGGGAGAGGCGAAGATAAGGACAGAGGAGGAGACCGGCGGAAAGGATGAGGACACAAAAACAAAAAGGAGCGCTCCAACTAGAGCCGTGGTATGACATGGTGGAAACAGAGGTAAAACAACGGGGCCAGGCCTTCTGGTAGGGGTCAGTGCTCCTGGTGGGGTTGTTTGTTTGGATAGGGAGCGCGGCGCAGTTGAGAGACACGGGAGGAATTCGTCTTCCGCGGTAGCAGGGTATGGATGGAGGAG…
CLocus_140865	1	532	46.19	89.05	272	71115	TGCAGTCCCCAGCCACCTAGTCAGCTGTTTCTCCTGGAATTCAAAAGCTGCTCTGTCGCCTGGCAACAACTATTTATGGAATCCATTTAAATGTCGTCTTCAATTTCATACAAACTTCTCTTGTCATTCAACTTCAAACANNNNNNNNNNTGGCTCAAATATGGTCTCGACACAGCGCGTTGTACCATTCTCGGTATGAATCATCAATCACTGTACTGTTCTTTTTTTTAATCTCTGAAACTCAGCATCACTGACAAAACCAGACAAGATCATTATCACTGACAAAAAATCCTATGTTTCTTAAATGCTTCCAACTAGTGAGTGACGTATGATCTATGTTGGCAAAGCCAAAC
CLocus_20011	1	533	46.19	89.05	91	13794	TGCAGAGCCTTGTCATTGTCCACTCACTGATCTTTTGTGCCTTGTTCACACTGTAGGGCTGACCCGAAACCATAATGGCTTGGATATTCTTTTCACATCATCCTTTCCAGCACAGTTCTCAGCAACTATGGAAGATCCGTAACAACGATACAGATAATGATTTTTGTGTGGAGAACTTACCGATACTGAAATATCTGCCGCAATTAAAACATACTTTTTTTACACTGGGGAAATGAAAAATAGTTATTTTCCACACTGCATTTTTATAAATTGCCATCCAAACCAGCAATTGTCCAAGAAATATGCTTCAAATGTTGATTTCTTACTTTGTGAAATGAATGACGCATCATGAGAATGGCTGCCAGTGTTCAGATAATCATAAGTTATAATTTTTGGTAT…
CLocus_88679	1	534	46.19	89.33	51	53690	TGCAGTGGCTGCTGCTGTGTTCAGCCATACATGACTGGCCTGCCCGCCTGTCTGTCTGCCGCCGCACTGCAACAGGGACACCAAATTAATTATCTCCCTCCTCTGATCTACGCTCGTTTGTCCTTCTTATACTCCTCCTCTGTTCCACAAACTTAATGACCTCCCGAGTGGTCGTTTATCATAAGCCCGCGAGCATTTCCCCCACACTGTCAGGCAGATAGGCAGGGTTAGCAGGGAGGCGGGGGGCTGGAGGGAGAGAGGGAGGGAGGACGCCCCACCAGTCAGAACAGGTGTGGCATGGCAAGATTATAGACACCCCTCCACATACACACCCAGACGTGTAAAGAAGACAGACACACTCCCACGTGACTGTCAACCAGAAACCATTAGATATTGAGC…
CLocus_21476	1	535	46.19	89.9	90	14751	TGCAGAAAACCTCGACCACACAAAAGTTGAGGTTACAGACGCTAAAGAGTCTGCTTGCTTGCCTGTTTCTATACTTGAGTATTTAACACGTCTGTTAGGTTTGATAGACTTGCTGGGTTTTGAGAAACTGAGCAGAACACTCAGAAAAGGCTGTTGTCAGATACTTAGGACAGGTTTTGTCAAGTACAACATTCTAGAGTCGACGGATACATTTCCCACTAAATGACAAACCTGTTTAACCACTGTCTGTCTGTCTTGTGGTAAAAAGCAACATGCTTATCTTCATTAAAAGCCCACCTCGCTTATATTCAGGGTATCTACGGATGTTAGAGTTGTGTGCTGTTTTGAGTGTTGTTATTAGTGTAATATCCTGAGTCTAAATACAGTATCACTGTCAGC…
CLocus_72473	1	536	46.19	90.18	159	45546	TGCAGTTAAAGCAACAAAAATATATATATTTTGAGGGGGTGTTGCACACGGACACGGACATAGGCAGTACATTTACACTGCTTTTATACTGTTATGTTTTCTGGATGAATGGATTACAAACTGACAGGTCGGTGGTTGTTTTATAGGGACAGGACTTTCGTCTCTTGATGAGATAAAACAGACCCTATCAAAAGTCAACCAACCCCCTCCTCAGGCCCCAGCTGCCCCACAACCCCCTCAAACCCTCCCTCTGGATCTGGATATCACCAGGCGGTGATACAGCTCGACAGCATGCTCTCAATTGATGATTTGTCGCCATTTATAAGCTTTGTTTACATAGCAGGTTAGGATAACTAACGTGGCAGATTTGGATAATTCATGTGGCGGATTAGGTTAATT…
CLocus_1623	1	537	46.19	90.18	53	1423	TGCAGTCAGTGCAGACCGGCCGGGGATCTGGAAAAGAGCTGTCCTTTCCACTTCAATTCTCTTCTTACCGCTTGGCTTGTGAGGATCAGAGCAGTACATGGTCTCATTTGTATTGTGATAACTTTATATAGTGTTGACTAGTTTTTTCAACTCAAGCGCTCCTGCTGTGGTAACTGCTGCCCAGGTAACTTGGCTTGATGTCTGGGGTGTCTTTGAACTAGAATGGGCTAGACATTATCATATGTGTTGATGCTCTTCATCACCAGGCAAGCTCTATCCTGGAACCCACAAGGGAAAAGAAGCTTGAGGCAGATTTAAGGAGAACTGGGGTTGAATGAGCTGGAGAAGACTGCCCAGAACAAAGTACGATAGAGAGGAGTCGTCGATGGCCTATATCCC…
CLocus_38355	1	538	46.19	90.18	162	25649	TGCAGGAATCCGTCTGCAGTCAATAAAAATATGCTGTCTGTTTGAGCTCATTGAGACATTCAACCTTTGTCTAAAAGTCTAAAACGTTTAGTCTGAAAAGTGTCAACTTTGTGTTAAAATCTTTCTACTGACAATCCCTCAGTTTATACTGAACACCCGGATGCATTGATTCGTTTTGCACCTGGCTTTTCTGTAAATGTAATTAGCCACTCATGAACATGAATAGCTGGCAAGGGCTCAATTCAATCCAACCTATTTTGCAGTATTTCATATTTTTCCTGTTGTCAAATCAATGTCAGAATGGTTCAGGGTATTGTAAATGTACCCGGTAGACTGACTCCCCTGACACTTTCAAGACCAGACCAGGGGGAAAAAAGTCCCTACATCACAATTTTATGA…
CLocus_5431	1	539	46.19	90.18	83	3800	TGCAGCCTACTGTGTGTTTGAAGACACTTTCTACAAATAATACACATTTCAAATGAGTTCATTTGCAAACCCACAAATTCATGAAATCTTTCCTTCAGTCTTTTGTTGAATTATTTGGCACGCACTTGTCTCTTGCAGTGATTGCAGGGTGTGCTTTGTTTTTTTCTCTGTATTTGCATATAAGAGCTTCAATATAAGAAGCAGTGTTTTCCTTAATGTCACATACAGTACTACGCGAGCTATGTTTACATAATGTGCACTCAATCAATCTACCATTGACATTGTATTTCACCGCTTCTGCACTTCTGCAAAGATTACATGTTGAAGGAAATACATTCATTTAGAGGGAGTCATCGAAAGGTAAAGGTATCATGTTTCCACAGAAACGCTGCGCAGCTA…
CLocus_75110	1	540	46.19	90.18	95	46924	TGCAGAGGGATAAGAGAGAGCCATGCGAAAACAAGTTTTGCTCAGTCATGGATATAAAAGTTCTTAAAACAAATTGGCTCCCTATTTGAAAAGAAGTTGGAGAACAAGTTATGAGTTTTGGTGATATTACGATACTGTCAAAACGATACAATACAATATCGTCAAAAGTAATATCCCGGTATGTAACTGGATCAATTTTTTTCCCCATCACTAGTCTTTTGAATGTTTTATTAGCTTTTTCTCTGTCTGCTGGCTTACAGAGGATCAATTAGTCATGGAATTCACTTTTATCTCTCGACAGAAACTACTGTTCTTTTCTCTCTCTCTCTCTCTCTCTCGTTCTCACACACCCTCAAGACATCTCTTTCTACAACGTCAAAGATGCAGATATTATGTATA…
CLocus_93420	1	541	46.19	90.18	125	55717	TGCAGCTATCTGTTGCATAGCGCCTTTTGTTCTTCCTCTCTCGGTAAGATTTGGCCACAGGTCGCAGATTACAGAGAACAGAAGCCATCACAGGTATTTTTACTGTTTGTTTCCCGAAACAATCATTATGGCGCTCGGGAGAGAGATGAGGCGGAGAGAGGATTTCAATAGCTAGGCACAGCGGCGCAGTAAGATGTCTTCACATGTGGGAATGAAGGATGGAACAATGTACATTCAAGGTAAGTTGTGCTGTCTCATGAAAGAGGGCCTCAAAATCACAAAGATGTATTATTTTTACCAGATCTAAAATGGCTTCCAGTGAATACCTGGAGGGGACGGACATGACATAAGGCTGCTGTGATGTGTCTGTCAGTGTATCTGTACCTTGAAACACCACAG…
CLocus_32573	1	542	46.19	90.74	273	22087	TGCAGTAGACTGAACCGTTGATCTAGCTAACGTTAGCTAGTTACATGGTTGACACTACAGTTAGCTAGCTTAGACAGCTTGTCTAGTTTCAACCTAATGTGATAGCTAGTTAGCTATTGCCACACACATCTGATTACTCTATTCACTCTTTTTGCCACTAACAAAGTGACTAGTTGGGAAACAAACAGAGATCGTATGAGGAGCTAAAAACAGGAGATGAAACTTTTTCTGTCAAATTCTGGGTTAGCCAAAACTAGCTAGTTAGCTACCTAAGCATTTCATTTGCACTTGTCCTCAACTCAATTTCAGCAGCAGAATTATATCTTACAAATACTTATCTTACTCCAGAAATATATAATATTGCAAACGCAGAAGGTAATTAAAGTGCAATTTACCTCG…
CLocus_12674	1	543	46.19	90.74	54	8669	TGCAGGTTTTTATCTACACAACGTAGTAGATGCATTGACCTTCTGGTTCCTTTTGTATGGTAGACTGAACAGTAATGGTCCAGATTGGTCTATGCTCTCTATGCGTTCCAAATAGGAACATTAAAAAGTCAACTTTAAACATTAAAACGTTTATTTTTGAAGTAGTGGAGCTATTGGAGATTTTTTTTTATCTGTATCTGTGTGTCACCAGTAAATGATCAATGTGTGTTGCATGGTGGAAAACATATTTGACATGAGCTGTGGTATCTCTCAACAAAAGTGTTTCTGTAATACTGGAGAAAAAAACAACACCCACTTGCTCACTCAGTGCATTGCATTCATACCAGAAGTTAAACACCATCTGCTCCAGGGTCTCTGTGTCTTTCTGGGTCCGACATT…
CLocus_29505	1	544	46.19	90.74	229	20043	TGCAGATTTTAAGTGGTCAGTTTGAATTGGAGATCGCTATGGCATGGCTACTGCAATAGAAACAAGGTTGTGGATTGGTCATGTTTTTATTTGTACCATCTCTGTCCATACACAAGGGATACCACAAAATGAACATTTAATAATAAACTGTTTAACAAAATTAAATGACATTGGTGAGCGGTGAGCATATCTGAGAGCAAAAATTGAATATCAAATCAAATCAAATGTATTTATATAGCCCTTCCTACATCAGCTGATATCTCAAAGTGCCGTACAGAAACCCAGCCTAAAACCCCAAACAGCAAGCAATGCAGGTGTAGAAGCACGGTGGCTAGGAAAAACTCCCTAGAAAGGCCCAAACCTAGGAAGAAACCTAGAGAGGAACCAGGCTATGAGGGG…
CLocus_58718	1	545	46.19	90.74	164	38118	TGCAGCACCAAACCAGTCTGATTGAAGAGGTACCCCAAACCTATTACCTCCCCTAAAGAAAAAAATATATGAGAATACACCAGACTGAGTATGGAATAATTCTATAATAACATTTCACAAAGAGAAATGTGTTGCTGTTTATATTAAATATAAAAGCGGCATTGTTACATATTACATAAAAATCATATTGCCATTACCAGTGTATTTACGTGGAACAGTGTAAGGAACCATAATCTTTCCAAGCATATCCTGCCCGAGGGTGTTGGCAATGTGACGAAGGATGACACTGTAGGAGTGTGGCTCCTTCCTGTCACTTGTAGCTGCAACAGCATGGTCCTGATTCCACCGTGCCAATCCATCAACCAGGTACGTCTGACAGAAGGTATCACTGGCTAGTGT…
CLocus_76871	1	546	46.19	90.74	134	47814	TGCAGAAAGATTTCGCATTGACAGTCATTGGAGAGAGTTCCATTGATTTTTTTCAATAAAGTGAATGGATATGGATTGAAATAAGAATTGCAGAAAACTTTTCTGGTAACATGAACATGATAAAAAATGTGATAATGGTAAGTAATAACCTTGTGACAGTGCCAACCAATCAAATACCATATGTGGTCATAAAAATATTATCTGTAGTGGCTTGTGACCAACATAAAAGATAACTACTATTAAGCAGGCTACCATATGCACATCCTGATTTCATAGAGTGGAGCGTAAAATTGTAATTTGTGAGAAAAGCCAGTTCTCTGAAATCCTCCTGTTAAAATTACCTATAAATGACGATCCCAAAAAACATTTCAGTGTCAACACAGCTAAATGGCGATCAAG…
CLocus_29028	1	547	46.19	90.74	254	19693	TGCAGGAATCCGTCTGCAGGGCTCTACCTTCCTTTCTGCTTGAGTTTAAATATATTCATTACTCTTGTGAGAGTGACAAGGAGAGCATGCGGGTAAATAGGCTTTTGCTCCTGACCTTTCTGTGTGATTAATGGCTAGTGTGTCTAGCAGCAGCGGTGGTTGATGCTAGCGCTCCTCTGTGGATAATGTGACAGGCTAAGACCTGCTGCTCGACAGGCTCGACCAACTCAACTATACATCCTCCTCTCCTCAGTGCACAGATTCATCTTATAGAGTCCTTGGCCACGCAAAGGGCACAGGCCTTAAACCTAAATTATTGCTTTGGTGCTAATATAGCTCATGTTAGGTTTTTTCTTTACACCAGCCCAGCATAGTTTTATTTACGTTTTTGTGAGAATA…
CLocus_13682	1	548	46.19	90.74	79	9347	TGCAGGCCCGTATTGGACATTTCTACTTACGTTCTTAACATTGTAGGATAGTGTATATATGGGGTACATTTCTTTAGCATACTAATACAAGGGACACATGCTCAATTACAGCGTATTAAAACATTCCAAATTGATCGGCATTTCTTGTCAAATGTCAATTTGATTTGGGGCTCAACATGGAAAATGAGGCTCAGTAGCCTCTCCTCTCCATCATGTCACTTTCATAGGTTTGATAGAGACGTGCAGAGACACTGTGAGGTGGATGAGTAAGGTGTGTCTGACAGCCTCCAATGCTAATACGGCTAAAAGGCCTCAGAGTTAGTTTATGTCTGGCTAAGCTGTCTTGTGCTGAATACACAAAACAGGAACCGGTCACATAGAAAGTTTAGGAGAGGAGGG…
CLocus_3376	1	549	46.19	91.02	222	2510	TGCAGGCAGAGATGGCGTACAGTATGTTAGCAGAGTTCTCCATCATTGTCTAATGCAAGGCCTGTTCCCAAATAGATTGACCTGCTCATAACAGACAAGGCGATGGTGATGTAGGCACAGCATAACTAATATAGACAAAATCATGATAAACAAAACAAATCTTTACAAAAACAATTCCACAACATGGGGTGAATTAGAGATCAAAAGAGAAAATAATTGGGGAAAAATCTAATAATGAAGTAAGCTTTATGCAACATCTTTTGAGTGAGAATCCATTACACCTTTTGGTTTGTGTTAGAGATCAGACTTGATGAATTGATATCAAAAGTAAAATACCTCACAATATACTGCCTGCCCTACAAAGGCAAAATGCAATGACTACAAATTTGGTCAAAAATC…
CLocus_26836	1	550	46.19	91.02	33	18283	TGCAGACAGTATGTTATGTTTTTGGTGGCGACCCTCATCATCCCATTCTCCCTAGCCAATGAACTGCTGGGATACTGGTACTTCAAGTCTCTGTGGTGTGAGATCTACCTGGCGCTGGACGTTCTGTTCTGCACTTCCTCTATAGCTCGGAAGAGCACCTGTGCGCCATCTCATTGGACCGTTACCTGTCCATCAGTCGGGTTACCTACTCCCGCCAGCGCACACCCATGCGTATCAAAGCCTCCATCGTGGTGGTGTGGCTCATCTCGGCCATCATCTCCTTCCCTCCTCTTCTGTCGCTAAATAAGAGCGAGCCCGGCGGGGAGGGGAGTGAGAGGGGGCCTCAGTGCCAACTGAACGACGAGCGCTGGTACATCCTCTACTCCACCGTCGGCTCCT…
CLocus_34726	1	551	46.19	91.59	185	23425	TGCAGGATGCCTTATAAACATCAGATGCATTTGTCAACTTTGGGTGAGAATTTAGAGACTGAAACGTTATGCAGTGTACAGCACTAATGAAAAGCCATTATACAGTGCACAAGATTTATACATGTGCTGTGTATTGAATTATAGAGTGTGCAAACATTTGGCAAAATGCCTTTTGAAAAATACTCTTTTGTTACTGATTCTAAAATGTCTTCCAAATGGTCACAGGTGTTTTTTTTAATAACAAGCACTGGAATAGTTTACTCAATGTTGTAAAACTGTTTAAATATTGCTTAAAATATCCACGCAATTGCATTCCCACTGGGCACACACTGGTTGAATCAACGTTGTTTTCACGTCATTTCACTTAAATTACATCTGTGGGGTCACTTTTATGCAAGC…
CLocus_141350	1	552	46.19	91.87	261	71193	TGCAGGAAAGGGCTACTGCCATATCTGTGGATATCTGCAGAAAATCATATCCCAAGTTGTGACAACAAACTTTGATAATTGCATCCCTGTGGCCTGGGTGTGCTAAGTGGCATGCTGGAGAGTCACATGTGTTACATCCCTATGTGACTGGTTGACCGACTCATCCATTACACTCTCGGAAATAAGGGTTCGATTTGTTCCTAAATGGGTACAACCACTTGTCACTGGGGTGGTACCCTGTAAGGTCCTCCTTTGTACTTTTATAGGTACATACAGTAATTGTACCCCAGTTCATACCTCAGATAGTACCTTTCTCCACAGGTACACAAGCATGCCTT
CLocus_97983	1	553	46.19	91.87	111	57548	TGCAGTCTTGAGAGATTGAACCTTTGGTTTGACAATAGAACACTTAAAATATCTGATGACTTATCAAACCTAGGAACATACAGAGATAATGCATGTATCTAGAGCAAACATACCAACTGAAAACGGAAGTTGATTGACGAACTTTGCTAGCTTACCTCGAACGTCAAATTGTTCTCGAGAGAGCTATGTTATGGCTGCCGACAGGGCGTCGTAAAGCTTGTCTAAAAGAGCAAAATAGTAACGTTACAATCCATTCACAGTTGTGTGCTGATTGAAGATGTGCGACGAAAATCAAGGCTGATGAGATAATAAACCCATTTCCGGCGTTATTATTACTAGTATTCCTTTGAGAAACGTCGTGTACCCTTTTGACCAACTTTGCCTATTTGGTACAGTGAC…
CLocus_66120	1	554	46.19	91.87	184	42186	TGCAGGTAGGATGATGCAGGGCACAGCACAGCACAGTGGATATTTACACTGAGATCTGGGTTTGAGACTGGGGACTGTTTTTGGGTAGTGTGATGTAAATACAGCAAATGTTGATTGCTCTCTCTCAGCTTAGAGGTAGAATTGGTTCCTGTGGATTCTGTTCTGTATTTGCTATTAAAAAAAAAAACAATAAAATGCACAAGCACCGCCTGGTCAGGCATTTCTACACTTCCTTTCTTCCCTCCTCTGTCTTGATCTCTCCGAACCATGAATCAACATTAAAAAGGTATTGTAATTGTTCATGAGCTAAAATGTTGTATGTGTCTAACCTGGCTGTCCAGTCCCAGGCAGAGAAGCATGAAGAAGAACAGAGGAGCCCACAACTGTGGCAGAGGCATA…
CLocus_52362	1	555	46.19	91.87	263	34288	TGCAGCCAGCTCCTCTTTACTCTTCTTCTTCAGCTTCTTACTGTGAGACACCACATCCTGGGAAGACAGACAGCAAAAACAGATGCGGCAGCATGTAAAAGGCCCTTCTCACCTATCCAGTTGTGTTTGATCAGTGATGTGCCGAGAGCTTTAAGGAAGACAGGGATGCATTATCAAAGTATCTGAGCAGCAGGCCTATTACTGTTGTAGACAATAAAGTGCTGTCTCCAGAAGCAGTTGTTATCAGCAGCATAAGGCAAATGGTTTTGGAAACTGTAAATCAAATCAAATTTTATTTGATCTGTAGCAGGTCTGTTGGTTAAAAGTATAGTTTCTCAGTTGAGTTGGAAAGCACTGTTTTGTCAGTTGTGTTCCCTCAGTGTGTAAAACTATAAAATG…
CLocus_21152	1	556	46.19	91.87	208	14479	TGCAGGCTTCAGAGAAGTCATGAACTCTCGCACTTGTTGCTGTTTATATCACACATAAATAACCCAAGATGTCACGCATAAATAAACCCTTTCCCCACCTCTGAACTCCACATCAAGCCACACACACTCACCTCTTTGACGTTGAAGGGACATTCTCGCAGTTTCACTGTGGATTCAGTCTATGGGGCACAGAGAGATAGGGACACACACACACATTACCAAAGGGGATACAGCAATGAAAACCCTCAACCCTAATTTCACTGTCAGAATGCTACACCATATGCCGTTTTAACTGCTATCCTCCATCATTTCAATGAAGGTAGGATTTGAGTTTAAATCCCAAGGTCTGTGGGTCAGGGGTGCAGGTCAAATGCTAGGTGTTAAAGGTTAGGCATTTGC…
CLocus_38516	1	557	46.19	91.87	230	25760	TGCAGAAAATCATATCCCAAGTTGTGACAACAAACTTTGATAATTGCATCCCTGTGGCCTGGGTGTGCTAAGTGGCATGCTGGAGAGTCACATAGGGGTGTTACATCCCTATGTGACTGGTTGACCGACTCATCCATTACACTCTCGGAAATAAGGGTTCGATTTGTTCCTAAATGGGTACAACCACTTGTCACTGGGGTGGTACCCTGTAAGGTCCTCCTTTGTACTTTTATAGGTACATACAGTAATTGTACCCCAGTTCATACCTCAGATAGTACCTTTCTCCACAGGTACACAAGCATGCCTTTTGCCTTTGTATAATACCACCACAGTGACAAAAATAATACCACCACAGTGACAAAACAACTTAAACTGGTACAACACTTTCCCTCAAGGGTG…
CLocus_22213	1	558	46.19	91.87	52	15268	TGCAGTAATACCCACAAGGACGGGGTTACGACTCATTTGTGGCCCAAAAACAAGAAGCTAGTTTTGAAGTGGGACTGGTTTGTCCGGTTGAAGTGAGCGGATTGGAGTATGGGAACCATGCGCACGTCTACTGTATGTTG
CLocus_47871	1	559	46.19	91.87	135	31600	TGCAGGTAGGATGATGCAGGCATTTAGCAGCTGAGAGCCGAGGGAGGGGAGAGAGACGAAACAGTGAGACAACACATTGTTTTGCCCTGAACCTGAATGAAGCTAATGCTAAACTGTAGCTAGTGAACTCACATAATTTGAGTTGCTAGCTGACTATCCAGGATCATGGGACTTCTTTCTAGGTATTGATGAGATTTGTACTTTGCACAAATCTGTAGCGTGTGTAAACTATCCCTTTAAGTTCCCAGCAAACTGGCCAAACTGGATTTCTATAAGTCAAAAGTGCTCAATTTCCCTGTCCAGTGAGAGCGTAGAGGCAGTGGGGATAAAGAGGAGGGAGGTAGATAGATAACACGCTCAATAGACCTAATAGATAGTATCTAGAAGACAGATCCTCGA…
CLocus_23852	1	560	46.19	91.87	324	16242	TGCAGTAGAGCACCATGTCCTGTCTATCTGGCTCATCCACAGGAGCCAGGACAAAAAACACAACTCGTCTGAAATGACATGTGGACAGAATCTGCTAATAGCAAAAAGGAAGTGATCAGTCAACATGTTTTACACCAGGGTTCCAGTCAATTCAGCATCATTCAGTAAAGGGAAGTGGAATTCTACTTTTTTAATGGAAGCATTTAATTGTTTCATTGAAATTCCAATACCCTCCATGACATCCCTGAATGGATAATGAATTGACCCTAACCCTGTACACATCCTACCCTTCCAGACGGGTTAAATCCCTTCATAACAACGGCTGGGGTGAAGAAACTTCAGTCACAGTGGAAACGTTATGGCATAAATATGCATCAACAAACTCCTCAAACTGCTGGC…
CLocus_59176	1	561	46.19	91.87	178	38345	TGCAGGCACCTTACTGCAGAAAAGTGCCCATTATTTTATCCGCTGGCATTTGACCAATAAAGTCGCAGGTGCAGAGTTTGAGGGGACAGAAAGGGCCTGGGGTTAGGGTGAGAGGGGGGTACAGAGGTGTCCATGTGGTAACATTAACATTTAGATCGATACCAGCCTTTGTGCCTGCGTGTATGTCCCGAGAGGAACATTTCACTCACAGGCGTCACTCTGAAGTGTTACTAAACACAAGTGACCTTCTTTACGCACTGATGGCCATTGGCCACTCACACACACGTACGTACGAGAGAGATGGAGAGAAAGAGAGCGAGTGACAGAGAATGGCTTAGAGCTTCATCAGAAATGAACTACTACAGGACTAACTACTTTATGCATTAAGACCTCATATTT…
CLocus_8896	1	562	46.19	91.87	197	5998	TGCAGTTTATACACATACTGTATGGTTCACTTTCATTTATTTGTATCTCATACACAGTCATTTGCAATTTAACCCATGAATTAATCTATGAATACTTATTCTCTATAGGCCTTCACTGGTTCAGGCAATCAGGTCTGGATGGCAAAAAGAAAGGCATTGAGCCTAGCCCCGTCCCCATCGATCCCAGTGACATTAAGAGGTTGGGAGCTATGACCAGTCTAAAACCAACTCCTACTCCTTTTCCCCATATCCTTTGACTTTTGTATTTGCAGATCAGATCTGCATATCTCCCTGAATGCACATGTGACTAGGGTTGCAAAATTCTGGGAACTTTTAAAGTTCCTGGAATTTTGCAATCCTACATGTGACATGCTATGATGACATCAGCTCTGAACTTAA…
CLocus_24278	1	563	46.19	91.87	163	16488	TGCAGCAGGTAGAGTCTGGGCTTGTGTGTGTCTGCCTGGCTCACCAGGTCTCCACCCTACACAGCAAACACAGGAACAGGTTCATCATTAGACTGAGAGAAGACTAGGAAAGGAAAGAGGTGGATGGAGGACAGGAAGCGTATAGGAGGGTGGAGCAGAGCAGAGGACCGGGAGGTGGAGATGGGGAGAGGAAGAAAGGACCGGAAAGGAGGTGAAAAAATGAGGAGATGGTAACAGTAGGAAGAAATTGAGAGGAAAGATAGAAGAAAGGTTGCTGAATATAGGAACAACAGGAAAAGAAAAGAGAGGAGTAGAGGATGAGAGGAGAGGCTATAGAAGCTCTATGGTGAAGACTTACATCCATCAGGTTCTCTTCCATGTAGTGGGCGAAGTACTTGA…
CLocus_128399	1	564	46.19	91.87	68	68091	TGCAGGTGGGAGATAGGTGTTATGAAGAAGGGATGTACGATGCTGCCAAGCTGCTGTACAATAACGTGTCCAACTTTGCCCGCCTGGCATCCACGCTGGTACACCTAGGAGAGTACCAAGCTGCTGTGGACAGCGCCAGGAAAGCCAACAGCACACGCACCTGGAAGGAGGTACATCTAAACATTCTTACACACACGTTATGCTGTACGTACGTGTAAGTAATTTGTCGGGTTGTGTATCATGACTTCGCTCGATCTCTCTCTCTCAAGGTGTGTTGTGCGTGTGTGGATGGGGAAGAGTTTCGATTGGCTCAGATCTGTGGTCTACACATTGTTATCCACGCTGATGAACTGGAGGAGCTCATCAGCTACTACCAGGTAAATCCCCTGAATCACTTTA…
CLocus_59874	1	565	46.19	91.87	7	38746	TGCAGTGCAACTGTGTGGAGGATGTTGGCAGGGATCCCCACTTTATTAATGATAAAAAGCTACTGCTTAATCTCATTCATAGCCTACGTCTGAAGTTGACCAGCTTTTTCAGTGTTTATGCTTGGCTTTTCTTTGGGCTATGCATAGTCCGTGCAATAAATGTGCTTCGAACCATCCAGATACACTACTTGGAGTATATATAGGCTTCATTTGGGACACTAGCCTATAATGTAGGTTAACATCAAAGAGAAAAGTTTGGTTTTAGTCATGTAACATTGTAGCTACCCTTTTACAGACCCACCAAGTAAAGTCATGATGTCCATGATATCTGTTCTTCATTAAATTTTATTTCAATTGAAGTCGATAGTTGTTACAGTCTCAAATCTCTGCAAGTCTGAC…
CLocus_103411	1	566	46.19	92.15	306	59773	TGCAGCCAGGGAAATAACAGTGCAGAGCATGTCACTTCATTTATGAATGTATTATACAGATATTCTGGGGGGAGGGGGAGTAACAAGTGTACAGTTAAGAACAATACATTGGATTTAAAAAAAACTTAAGCCCTTCTCAGTAGACATAGTGATTTTCAGAGAGTTTCCTGTCCTGCAAAGCGGAGAGAGAGAAATATAGAGGTTAGAGACCAGGAAAAAGGAAGGAAAACAGGAATATTAGTGAGAGTTTTATTGGATAGAGCTGGGTTTATCGTGATGATTATAATGATTTTAACAAAGGTTTTCTTTTCATCATAAGTGTTATATGTAATGTTGCTGTGGTGTTGTGGTTGTGTTGACTGATGTAAGGTCGTAATTAAGTTGCTGTGATCAATCAAT…
CLocus_37407	1	567	46.19	92.15	128	25075	TGCAGGAGATGAAGCAACTGAGGAATCAGATTCATCATTTAAGGCATGATGATCTTGACTTTGGAGTGGACCTACAGTTCATAACCTGAAGACCTGTAAATACATGTCATATCTATGAAGTTGAGGAGATCATGGGTTAGAAATGCAACGCCAAGCATTACTTCAGTGCAAGCATTACTACAGCCTCAGTCAGCTGTCCAGACACAAGGCCACTGACATCATCAGTCTGGCAGTGTGGACTCATGGAGAAGGAAGAGCTCTTCTACCCACAGGGTTTAAAGCCCTGACACCAGGCATTATTCCACTACTGCCTGCCTACCACGCAAGGGTAAACATTAAGTGATATGAATGGTTATGGCAGCCGTCAGGTCATGTTTATGAGGGCGTGATAAGGGCTTT…
CLocus_124412	1	568	46.19	92.15	239	67139	TGCAGTGAGGGGCTGGCATGGCTGGGTGACCATATGTCCACCGCTCAGATCAAACAGGAAGCAGTGTGTGTCCACTGGGAACCAAGGGACAACACCTACAGTACACTGTTTGGATCCTCCCTCCCTCCCTGACTCAAATGTGACTCTGTTAACTATTATGTGACATAGTAATAGTAAACGGGAACTAGGTGATATTGTAATACAAATCCCAAAGATGAACAGGGTGCAGTTATCTGATATCCCATTGGCCATTATGTCCTGCATCTGTGAAATCTGCCGGATGTGTGTATACTACCTTGGCTTGAACTGTGAATGCTCTATATGGGATCCTTCAGCTTTATTGTAGGTCACTACATAGTGTGTGTAGAGTGCATATATAAGTGCCATTCATTTTGACCA…
CLocus_23479	1	569	46.19	92.43	101	16029	TGCAGCCTTCAGAGCATAATGGGTCTGCTGCCATTTCTCAGGAGCAGCATAGACAGATACCTGAAACATATGACAGTGATGTTCTGAAATCACATATACCGCCTGTACACACACATTCACACACACCCCTGTCCCACCTACCTTGACCCCTGAGGCAGTTGTTGCGCTGACAGATCTGAAGTCACACACGATGAAGGCCACCAGATAGGAGCTCATCCTCACACTCACAGCAAAACGGTCCTCCATTAGACCATCATCCAGGACCACTGTCTGCTCCTAAAGGGGAAACACACACACGCACACACACACACACACATTGTAATGCACACTCACATACTATGATCCACCTGCCACCATGTTGCTTTTGTGTGTTTACTCACTACAGGCATGTTGGACAGG…
CLocus_86701	1	570	46.19	92.71	24	52692	TGCAGATTACATCAGCTAGTTTAACTGGCCAATGGAACCTTCAGTGTTTCTGACACAATCGGCATATATGAACAGAAAGCATACATGCTTTATTTGGTCTCTATTGACCTAATCACAGACCACCAAAAGTAAACGGTAATACCCACTATTAGGATTTGTTCACTTAATCCCTTAAAAGAGTTGTAATGAAATTCCTTTGTTGTATATCATTGTTTGACTTCCTAGTTGAAATCTGTCTCCCTGTTCCTTCTGTCAGGAATCTTTGCCTATCTGAACTACCATGTGCCACGGACTCGCCGGGAGATCCTGGAGATCCTCCTCAAAGGCCTGCTTCGTCTGGAGTACCGTGGCTATGACTCTGCCGGTGAGCTGAGGGAGATGATGAGACTGCTTGTCTCA…
CLocus_67916	1	571	46.19	92.71	125	43085	TGCAGAAAAGTAGCAGCCCCCTGTTAATGTGATTCAATCTCCCCTTGAGTCTTCATGAATCTGTCTTTACTGTGTTGTCACCCCTCCTGAGTTCATTACTTTCCCTTACTCCTACACCTTACCCCCCTGGACCTATCGCCACCAAACACTCTCTCATAACGCTCAGGTTTCCTGTTACATTAAACATATTCTGTTCAATGGTAACATTTGTCTTACGTGCAACGGACAGGAAGAATGTGCATGTGGAGAGAGAACATCGTTTTGGATAGAAACTCTAGTGCACTCTGAGAATAGACATAATATAATGGAGATAGGGAAAACAATAACACTGCATACATATGGAAGGCAGAAGGAGACAGGACTTGTATACATAGCTCATGTTCATTTCAGATTGGATTC…
CLocus_17105	1	572	46.19	92.71	157	11736	TGCAGTGTGTGTTATCATGCACAAGTCCAGCCATCCATACCAGTCAGAAACCTGGACTTGTAAAAGCTCTGTGGGACTGGTGTTGTTCTGTCAATTGAATGCTGCTATGGCTTCCAGGGATATTTAAGTTCACTTTGCTTCATTGTACCTGTGTAACCGCATTGCGTCCAGGTTCTAGGGGGTGTGAGAGAGTGTGTTACCTGCATGATAGCGTTGAGTCCAGGCTGTAGAGAACTCAGGTGTTCCTTCTTCACCTCAATGCCTTTCTGGATCTTCTCCTTACTGGACAGAGACTCCTTGTACTGCTCAGCCAGCCTACACACACACAAAGTGCCCAAAGAAAAGTGGGAGTTAATTTACTGCTTAGGCAACCTACAGAGGAAAAACAGTGTCTCAGTG…
CLocus_63435	1	573	46.19	93.27	110	40830	TGCAGTGTGCCAAACTTGTATGTGGAATCTGACCTTGTGGATACCTTTTAGCATACAGATACTGTACAATTAGGTCTAAAGAGCATACTATCAGGCCTTAAAAACATAATGAATTTCAGCCCTGACTCCTTTTTGATATATCTGATAATTTATTCCTCCTATACTTTCCTTGTTGTAGAAAAGTCATTGTGAAATATGAGATTTGTTCATCAATTGATAGCTTTCAAAGCGACATATCAAAACATATACCAAGACAGTGTTTATAGGATGTTTGCATGTTATTACTGTTGGGAAATTGTACTGCTCAGTTAAGCTTAACTAAAGAGATGTAGATCACACAGAAAAAAGAAAGTTATCTTCTGTGAACGATAGAAAGCCAAGCTTATTTCTGTTTGCTAA…
CLocus_6751	1	574	46.19	93.27	167	4632	TGCAGATCAGAGCCATCCTGGACAGGGGTCTATGCACACAACGGTGAGGGTTTACAGAATGGAAAACAAACAGGGAAAGATTCTATAATTCATGTTCTATTTATTCTGTGATTAAGGCGCTGTCAGGTTTTGTAATTTGTGTTGTTATTTCCCCAGTCCTCCCCCAGACGCACTGTGTGATGTGGTGGACCGTGTAGAGTCCAGACTGTGGTTGGTGACAGGGGCTCAGCACTGCCCCCTGGTGCGTGGGGCCTACCTGGGTGTGGCAGGCCTGCTGAGGGGGTTCTGCTCTCAGGGGTTCCTCCGCCAGATGAGGGATGTGCTCCTGTCAGAGCTCCACTCACCACACCAAAGGCTCCAGGTGCCCAACAGACCCTGTCTCACACACACACACACACA…
CLocus_48031	1	575	46.19	93.27	93	31682	TGCAGGACTCTCAGGGGTCTGAGCTGAGGGTATTTTTAGGGTGAGCCTTTGTAGTAATCAGTGTTCACATGACTGGAGTGTGATGTAAGGAATGTTTTTTTTTAACACAGAAATTATTTTATACAGTCTACAGTAGATGGAGTTCAGTTTAGCTGTGACTCCATAGTGAGTTTGATGTACAGTGCCAATGCTATAGAAACTATCAAGTCTGAAACCTTCTCTCTCTAGAGGAAAAATGATGGTAGGCTACACTTATCTTCATTTCAGCTACAATACTCTAACACTGGACTTAGAGCTGAGTGATATATATATAATGTATATACCATGTAATGTAAACATGTATTTCAACATTTTAATATATTGTTCTGTAATTTTCATTTCAAATTGCATGCATACACG…
CLocus_78811	1	576	46.19	93.84	150	48696	TGCAGCATTCCTCAAGAATGGTATTAGCATAAATGCCAACACAGCATCTGAACAGGCTGTGCTGGAGCAGTAATGCGAGCCAAGGGCAAGGCAATAGAATCTGTTCATGCTGTTGCATAGACAAAGAAACATTTCATCAGCTTACTGAAACTTCACTTCACTAAATTATAGGACTTTTATTTTGTTTTACTCTTTGCCCCTGTATTTACATGACTGCACATAATAAAATATTTTGTGGGCTTTCTTGCGAACACAATTACAAAACTTCATACTGGATGAACTGCTATTTTCTGCATCACTTTTTGCTGAAAAAAAAAGAGAAAAAAAGGGAGGGAACAGAATGTCTTTACAATAAATTACGATGATTCACTACCCAACACCTAAAAAGACCAAGAAAAG…
CLocus_78004	1	577	46.19	93.84	233	48376	TGCAGCCTTACAAGTTCTAGCTTTGCCTGCTGGGTCCATTTCCCCAGAAGAAGAAGAAGCATGATTTTCAATAATTTACGCCCCCCTAGGGACTCAGAACGGAGGCCAGGGAAACCATAAATATACTGACCTGCATGCAAGTGGCACAAGGAATCTCAACACTCATCTGACCTGTGGCAATAGTTGGTTTCCTCGAAAATATACTTCGAAATAGTCTAAAACAACTCTTTACCATTACCACTCTAACAAATGAGCACACAAACATCAACAGAGGAGCACGACAGAGGGGCAAACAGGGAGAAAAATGCTTCATTTTCCCTGTTTGCTTTAGTTAATTGATGGCTGGTCACATTGGTAAAATGACTGGTGTCATTTTATAATGAATGGCTGTTGTGACTA…
CLocus_61722	1	578	46.19	93.84	24	39853	TGCAGGGACACATGGGCTGCTGCATCATGTAATTCCACACGCACAAGACATGGGCATAACACCCACACAGTCCAACCGTAACACACACACATACACTCCAATCCTATAAAGTAATCTCCTCACAGTCAGCCCAAAAACAGTTTGTTAATACATGGGAGGCATCATTCCAATGGAGTGTGAGAACATAGTGGTAGATAAACTAATAAACTCTCCATTTCACAGACACCATGGAAACACTTGGTAATGCTCTTCTGTGTGAGTTCAAACATGTTCTCATTATCTAATAATTACAGTGAGCAAACAAGTCTTTAGTACACAAAGGTGAAATAAAAAAAATAAAGTCTTTAGTACACAATAAAAAGCATTCAGGCAGGTTGACTATGTCATGGTGCCAGGTGG…
CLocus_7416	1	579	46.19	93.84	79	5000	TGCAGCAACGATATTTGAGTGACAGGCTGTTCTAAAACTCTTTACAATGAAAGAATAAGGTGACCCCCGAAAGCCAGACGGAGAAGTGTAAATTAGACACGCATTGTCATTATATTACTGTAGCAAATGTAGTCCTTCCTACTTCACAAGACAAAAAGTTACCATGATGAGATGATAAACACATTGAACTACACTCCGTAGTGAGAAGCAGTGTCCCCACCATGAGCGTTGATGATTGGTCATGCAGATAGCAGAGAGGAGGCCGTTGAGAAGCCAGATTTAGACAGCGCATATCATTTAACAGTGCCATTTCACGTCATGCTGTTCATATAAATAATTTATTATAAATTTACCGGTTTCTTGCAGTTATTTATCCTGGGAAAAGGGAGTGCGTTTGGG…
CLocus_23205	1	580	46.19	94.4	323	15888	TGCAGACTTTGGAGTGTTTTAAAAAGTGTTATCAATCTGATGTCAATGGCATGACACATCCTCGGGGTCTTCTGTTCTAGTCAAACAAAACTACAAAAATGTGTCTTTGGAGTGTCTACAATGTCTATTTTAAAGAGCAATCTTGTCTAAAAACCCTATTGTAGACCCATTTATTATGGTTACAAATTACTAACCAAATGACTTTAAAATGTTAATACACTGTTCTAAGATTCCAATGGCAACAGATTAATTGACAGTGACACTCCAGCTCAGACCTGCCCTAAAGCTGCCTTGCGCTGTGGCATCAAGCCCCCTCCCACCCCTCTCCTCTCCAAACAGCAGGGCCAGAGGAATGCTTCCAGTGACTGCTCCAGCAGATAATGTCAATCACCTACTGTG…
CLocus_58300	1	581	46.19	94.4	212	37893	TGCAGCCCTATCAGCCCATCCAGATGGTATTGAGAACAGCTTTGACACTCCGGTAAAAGCTCTCCAGCTGCTTTGCCAACCCCAAATCGCCCTGACCTAAATCTGCTCCTCTCAGGCAGGGTAGAGAGCTAAGGAAAGGACCATTTAGACAGCTCCACACCATCCTCCTTCCTTCCACTCCCAATGACCAAGGCCAAACACAGGAAACAGCGGTCCAGAGATTTTTTATGAAACCAGCACCACCAGTCAATGTGTCTTACTTACAAAGGTAGAAATAAAATCCCTCAAAACACAATACACACCCCGAATATCACAAATCATAAATGATAGATGTCTAGGAAAATGGATAGCAATCTATAATGATGCACCATACGATGCAGGCTGTCTGAATGCTACAAA…
CLocus_34027	1	582	46.19	94.4	299	22974	TGCAGCCAGGCAGACCTGACTGTTGCTAGTCTCCAGCACTGACAGACAGACACACTCCTCTTCTCTCCTCCGTGACTCATCACTTCATCATTTGTTATTCAGAAGACATCCAAGACTGCCTCATGTTCAAAAGAGACATAGGGGGAGAATACAGCAACACTAATGAACTATATGCTACAATACAATCATTATTATGTCATGCCACTTGTCGAGATTTAATGAACATTCACGACAACTTGTAACTAATGGATTTGCAATATCATGAAGCATGCAGCAGTGTTTAATCTGATGGTGGTGGTGTATTTGCTAACTAAATTAAATCACTATGTGACATACTCTTGAATCATCCTCATAAACTGCAACTCAAAGTGACAGTATTGACTCATGATCACAATAAAC…
CLocus_34112	1	583	46.19	94.68	227	23037	TGCAGCACACTGACCTGCAGGCGGCTCAGCTGGGCATCGATGGCATCTAGGAGGAGGTCACAGTGATCCTGTGGCAGAGGGGCATTGCTGTCTTCATCCAGGTCTGAGTGAGCAGAGGGTATATAGGGAACAGGAAACGGTTTAGTCCAGATGAGAAGAGAAGGAATGAGAATGAGTAGGAAGAAAGACAGGTAGAGGAATTCAGTCTGAAGTACCACTAGTACCACAGTACTGAAGTCGCTCCTACCAGGTGGCGTGGCGAGAATCTGTCTCCGCACCACGTGCTCTCACCACTGGTGTCCCCCAGGGCTCTGTTCTAGGCCCTCTCCTATTCTCGCTATACACCAAGTCACTTGGCTCTGTCATATCCTCACATGGTCTCTCCTATCATTGCTATGC…
CLocus_7475	1	584	46.19	94.68	133	5068	TGCAGCACTCCTCGGGCATCTCAAAGGAAGACAAGACCCTAGGGAACCAGGGAGAGGCAGACCCCGACATGAAGACCTTCCTAACTATCGAGATCAAAGATGGACACACCATCACCACCTCCTCCTCCTCCTCCTCTTCCTCCTCTTCCTCTAGAGGCAACCTGGCCTCCATGACCCCCATGGCCCCACGCATCACCACCAACTCCATGGGACAGAGAGCAGGTAGGAGCACTGCCTAATGGATGCTAGATAGACTTCTGGTTCCAGATTCTTTATATGTACAGACCATAGCTTTTGATAGATTTGTGTTAAATCCAAAAACAGAAGTTGATATTTGAAATGATGCGTTACCAGTGGTACCAGGCGGACTGAGTGCCTTGAGCCTACATCAGTCATATT…
CLocus_23641	1	585	46.19	94.68	236	16103	TGCAGTGTTGTCATAGTGCAAGCAGAAGCTAACCAAAGCATCAGGTATAACACTGTGTGTAATACGAGGATAGGCTGGCTCTGTATTAACCATCCCGCAATCAGAGACCACAAGGAGGTCATTCATTGTACTGGCCTCCAAACCATTAAAAATAGTTTTGGGCTATGGTTTTTGAGTCCAGCTTCAGGCCTGTTATCTGTTTGAATATTTATTTTGTACTGTTTATTTATATGCACGGATGTATTGTGATTTATCTGACATCAAACAGAACCACCATAATGTTCCCTCTCTTCCATACCATTCCCATCCTCGCCATCAACTCCCACCATGGAAATTGCTTTGACGCTGCTGGACTCTTAAATTCGGTACTTAGACGTTTACAGACGACGACAATGTATC…
CLocus_4508	1	586	46.19	94.68	96	3245	TGCAGGACAAATGGGTAACAGAACTTATTCTGTTGCCAATATACAAAGAACTTCATGTACACTTATGGTTTTCAAGGAGTCACGATTTACAAATAGAATATATTTGACTGAATATCATGGTATTTTGTTTCAATTAATACATAATAGTCTACAGCACATAGTATATTTAATAAATGAAACTAAACATCCATACTATATTTACTCAAAGCGATTGTTCTTGTATCAAAAACATTGTGCAAAACAATGGACTAAAAATAACCCTTACTATAAATATAGCCCATCTCAAAGTTCATTGCATTTTTTCTCACCACTTCTGAGCCAAAAATACTATTTTAAGCACTTGTCAGAGACAGAAATGTCCCATCTTAACAAATAAATATGCTCTGCCTTATCTCGCTG…
CLocus_60088	1	587	46.19	94.68	200	38885	TGCAGGAGGAATGGGAAGGAGGGGGAGCGCTATTTAAATGGAGAGCTACATTCTATTAATCCATAAACTGATTTATGTCTGATAATATGCTGGTAACACAATGGCCGCTATGATTATGATTATGTCTGTTATGGTTCACCGACAAATAAGATAAGGTTGGGGGAGGGACGAGGGGGAGGGGCTACGAACATGTGAATTTACATATTGCACTGATACTCTTTGAGAAAGGGCTGTGTATCAGTCTGATAGATACAGTTGAAGTCAGAAGTTTACATACACCTTAGCCAAATACATTTAAACTCAGTTTTTCACAATCCTGACATTTAATGGGGCGGCAGGAAGCCTAGAGCATTGGACTAGTAGCCGAAAGGTTGCAAGATCAAATCCCAGAGGTGACAA…
CLocus_9172	1	588	46.19	94.68	265	6137	TGCAGCAGCAGGCCAATGTCAACAGCAAGACTAAGGTGAGCACCTCCCTCTGGATGCCAATGGAACTACACTTACCCCAAATGCATTGTTAACCATAAAGCGCAGTAGTATGAACTGGCTATGTGATGTGATTATTTTCATTTGGTCTGGTCAGTATGTTAATGATTGTGTCTCTGTCCCTCAGGTCGGTTACACTGCCCTGCACCAGGCAGCCCAACAGGGCCACACAGACATCGTTACCTTACTGCTCAAACATGGAGCCCAGCCGAACGAGGTCGCTACTGTACGCACCACTGCCTTTCACTCCCTTTCAGTCCACCTCATCCATCATCCTCCTCCAGCACTCCATCATCTGTTCAACAACTCTCTTTCAGTCTATCTCCTCTTTCTCTCTCTCTC…
CLocus_88098	1	589	46.19	94.68	14	53413	TGCAGGAGGAGAATTTGAGGCTGCGTATCCAGCAGGAGAGGCTGGCCCGCCAGGTGGAGGATCTGTGTCAGGCCCTGGGCCTGCCTGAACCACCACCTTACACAGCCTTCGTCCCGGAGCCATCACCCAGTACTCCCAATGACCTCCAACTTTCATCCAGCACACCCCTCAGCCCTAAAACACCCTATGGACCAGATTGTGAACCTGAGGCCACACCAGTCCCACACTGTCCCACCTTTGCCACACGTCGTTCTTCCTCCACCTCCTCACTGATAGGACTAGGAGGCATCTCGCACAGCAACATCATGGTATGCCTCTCTATGCCTGTATGGATCCCCTCCTGACAAAATATTTAGAATCAGTTCCAGCCTTTTATTCTTTACTGACACTCTCTTCCCT…
CLocus_112730	1	590	46.19	94.68	61	63444	TGCAGACGCCCTGCTTTTGCAGATAGGGGCTACTGTTCTCATACCAGACTGAATTGAATTAAAAAAATCAAATAGGGTCCCAAAATATGGGGACTTTACATTTAAGAGGTTAATTTCACTTGTAAGCTTCATATACCAATGTTTTTAATTTAACGCAGTTGAAATTGGTTCAGTTTCACAGCCGACCAACATCCAAAATATTGCTTATGAAACGTGGACATCGGTCCCACGATCAATGGATCGGACTCTTTGGAAAGTATCTCCAATAAAAGGGCTTTGGTATTTTTGTATACTATCTAATTGAAGCACTTCAATGGGTTGGATTTCATATTGATAGGTAGAAACCCGACAATAAATGACTGTATTACTATAGTCAAGAAAATGTGGTCATGCGAGTTG…
CLocus_69193	1	591	46.19	94.68	189	43765	TGCAGCTTTTTAGCCGGCTGCTTCGCCCCGCCTACTGTGCTCATGGATTGAGCAGCGGTTTGCAGATCTTTGGTGGCCACGCCCCCTGGCTGAATTGTGCCCTGGCATTGGACAAGGTTCTCTGAGGAGGAGGAGGATGAAGAGTACGATGTAGAACCTACATGGGATCTCCCGTGCCTGTCTGTAAGGGATCTGATGGATACTGCTGTGGTCATTGCTGTTTGGTTGACTGGCGCTGCTGCTCGTCCCTCACTCAGCTCGGTGGCTCTGCCTAGGACTCGGGCACTGGGGGCTGTCCCATTCCTTAGAGACTGAGAGCCCCTCTTCAGGAACGGGACACTGGGGCTTGGGCTGGGCTCTGTGAACTTACGCATACGGTCCCGCACAGAGTTAGCCCGG…
CLocus_26216	1	592	46.19	94.68	190	17788	TGCAGAGCCACACCCCTAACCGTGGGCCAAAGAGCCAACTGGACTGATCATGACTTTCTCCATGACCTCACCATGACACTACCCCTTGCCCCTCAACGCCCATTCTTGGAGTCCATTGAGACTCAAGAGAACTTTAGACTCCAACTCTTCATACCAAAGTTTGTAAACTAAGAATGTACAGTAATATAATGTAAAATAACATAATTTCCATAGGTTTTTTGTTTAGTCTCATCTCCAAGGCAGTGGAGGCTTCTGAGGGGAGGACGGCTCATAATAATGGCTGGAATGGAGCAAATGGAATGGCATCAATCACATGGAAACTATGTGTTTGATGTATTTAATACCATTCCACTAATTCCGCTCCAGCCATTACCACGAGCCCATCCTCCCCAATTAAGG…
CLocus_40839	1	593	46.19	94.68	60	27166	TGCAGCACAGATTTATTTTTTTTTAACCTGAAAACCCCTGGGGACATTACTGCCCTTTAGTAATGCAATGGTCGTATTTTGCCTTGAAAGGTGATTCCAAAGTCTTCGACAGTTTTATGATGGCTTTGCCAGTGTTCATTCCCCAGCACAGTGACTTGTAAGGTCAAATGTATTTAGTCAACAAGCAATGGTAAATATTGTGGTGGGAATTTACACCTGTATAGTGACTTGTGTATTGTCAGATGGTACAGTATGAAGATGGGCAGAGACTGCTTCTCCAATAGAAATCACCGATCACACTTGTAGGTGATGTAATGAAGCGGTTTTAATGTCATATGTTAACCATCCTTTGTCTAATGCTGAACTTCTATGGACTACTGAATTTCCATACTCTGACCT…
CLocus_80152	1	594	46.19	94.68	8	49318	TGCAGCTTTGCTGCTGGCTCCCCCAACGGCAATGGAAATCATAAACACAGCTATAGAGGTTAGGTAGGGGAGAGCAATGTTTTTTTTTTCCATTGGGGTCTACAGTTTCTAACTTTCTCCCTATAGAATATTTCTACTCCTCCCACCTCTATCTGTCTGTTTGTCTACTCTTTGTCTTTTCCTTTGCTTGATCTGCTAAAAGGAATTCCTACAAACTAACTTAACCCATTACTCTCTAGGTGACATGGATCATCTAGGCCCTCCCACTGTCCAGCTGGCTTAATGGGGAAGTTAGGGGAGGGTTATGGAAGAGGAGAGAGGAGAGGGAAGAGAGGAGAGGGGAGAAAGGAGAGGAGAGAGGAGAGAGGAGAGGAGAGGAGAGAGGAGAGGGGAGAGGAG…
CLocus_32741	1	595	46.19	94.96	145	22238	TGCAGATGCCAAGGTTAAATTGTTTTGGGAGGAGGTGGAACTCTTACTCTTCTTCTTAACGTACAACTTTGTGGCCGCAGCTTTATGTACTGCTATACATTACATTTTTCTACACTGTAAAAAATTACTCTTTGGATCAACCCCCCAAAAAATACTTCATCTGTTCAATAAATAAATTAGTTAGGTTTTCACAATTGAAAAGAATTATAATATTTAAACCAGATATATGACTCAATGTCAACAGTTTTTATTTTATTATTACCAAACCTATATTTCAAGTTGCAACCTATTTCTTTCAACACTCAATTTAATTTCCCCCTTTGGTTAATCCTTAACAAATAGCCGACAAATGAATATTTCATGTAAATACAATTTTTTTTTCAACACAAGCGAATTAAC…
CLocus_7437	1	596	46.19	94.96	109	5028	TGCAGTGATGATAGTTTGTCAGAGGCTGGAAGAGTGGAGTGGGAGCAGGTGGTGGGAGTGACCGTTGTAGAGACCCACTGTAATCACATCTGCACCACAGAGTCAATGGAGTCCAGTGCAGAGCTATAGGACCCACCAACCAGGTATACACTCCCGCTGGGTTAGCTTCCTCCACCTGGGTCCACAGTTAGACAATTACACACAGGGGATGTCCTCCATCACCAATCCGAGACGTGGACACAGGGCCCAGGGCAGGGCCCAGGGCAGGGCTCAGAGCTGAGACAGAGCTGGGGATACACACAGTGAACTACCCTTATGACTATGACTGACACTATAACTCACCCTTTTACTGTACTCACCCTTATACTGTGCTTGTACTCCAAAGCAATTTCAGACAGT…
CLocus_42587	1	597	46.19	94.96	78	28308	TGCAGTGTGTGCAAACCTGTGTGTGTGTGTGTGTCTGAAACTGGGTGGTATGGTGCAGAACAGGTTGGAAGTGATGACGTGCGCTCGCACAGGGTGACTAACTACATTGAAAATGTCTGCTGGGGAAAACAAGCTTTGTTTTTCCACCTCATCTATTTCTGTTTTCTGGATTTATTTGAACAATTCTTTCTTAATGGTGAGTTGTCCACTCAATATAGCCCAATTCCTTTAAAGGAGAAAATACTTAGTTTCATTATAGCCTACTCTTATTTTAGTGCTGAAATTCTGACATTCTAAATCTGGATTTGTTTACTAGCCTACATTTTTGAGCTTTTTACAATAATTATGAAATGGTCCATCCTAAAGTAAATGTAATATGTTTTTATAACTACCTTTTTA…
CLocus_10887	1	598	46.19	94.96	251	7303	TGCAGCAGGCAATAGCTTTCATATAGACATTTTCTTATGAAATGACTCATTAGCAATTCAGAAACTATTACTGATCCCATTTGAAGACAAATCATTTCAGATTTATACAGAAATTCACAGCCAATGACTTGTGATATTTTTACCGGACCAGTCTGCAATTAAATAAAAGTAACAGCTTTATAAGTTATTTGACACATGTACAGTATTTGGACTATGCTATACTCGGGCATTGAAGCTCCAGTTATGAGTGGCAGGCAGGCCATGGCAAACCACTCTCAGTGCTCCAGGAGTCAGCAGAGAGCAGCCACTGGACTGGACTGTCTGTAAAGGTGCACATGACCTTCATGGAAAAGCAGTAGACACTTTCAACTTCCGGCCCACTCTCCACACTGGTTCCAG…
CLocus_120856	1	599	46.19	95.24	64	65960	TGCAGAGGGAATGACATGACAACACAGTCACTGAGTTCTGTTCTACACAACACAGTAAGGTGTATAGAAAACTGAGCAGCAGAGAAAGATGAAGATGATGAACTGAGTAATTAGTAGACAGTTTGACAGGCTCGGAGAAATAGTCATTGTGTCAGTTTTACTGAGGACACCTCAACTAAGACAAATGGAGGGAGCAGAGAAGCAGGCACTGGTTCAGGCTGACATGGTGCTACGGTGAAGAGGAGAACAGACATTTAGTCTGCACTTTACTGTTTCAGTCTAAACATGAAATGTCACTCATTTTGTCACAAACTTCAAGTCATAAGCAAGAGGGCTTGTGTGTGTGCAATCAGGTTTTTGCCAATGGGCAGGATTCTAAGAATTACTACAGTTCCAGGA…
CLocus_50981	1	600	46.19	95.24	112	33366	TGCAGTGTAAACAGTAAAGTGATCGCTTTATCGGAGAGTGGGAACAGGACAGGAGAGGAAGGAAAATAGAGGAAAAGAGAGAGCGGTTTAGAGAGATGGAAAGATGGGAGGGAAAAGTGAGGAAAATAGGTGTTTATCTTCTGATTTGGGTGTTGGAGGGACTAGCACCTCTGGACATGATGGATGAGCTTGGGCTCTGGAGAGACAGGTCATGGACAGACGCCGCCACAACGAAACATGCGCCTGACACTGGGGCAACAGGGACATCTAGTGGCCAGGAGCCAGGAGTCAGGAGCCAGGAGCATACAAGACCTATAACATGTTCCACAGGGATGTGCTCTGTGTGAGTAGAAAATGACAGCGGTAAGACAGAAGCAGATGAATACCTCCATTTCAACT…
CLocus_104957	1	601	46.19	95.24	258	60330	TGCAGTTAGACTGGGAATGGGTGAGTGTGGAGGGGGCATGTGGGGTTGAGGCGCAGGTACATGTTCATAATATGAATTACTGTATTGTGTGGGTGGGTTTGAGGGTTGTCCATTGTTGAAGATAGGGTTCCTGTTGTGGAGAAGAGAGCAGCTCTGGTGGTTCGTTCAAGGACTGTAGGGGAAGGATCCCTGTTCTTGGGCAGCTTAGTTTAGCCCATTCCCTTGTGCCAGTCTCCGTGCCCCACAAACTCTTCCTGAACACTATCTGCTCTCTGCCCATCCTCGCTCTCCTAGCAAGCTCAAACAAAGAAAACAATCAATAAATCAATTTGTACACCTCCACTGTTGATCACTAAATATGTAAACTGTAGAGATAGGAAACGGATGTAGCCAGGCCCG…
CLocus_1411	1	602	46.19	95.24	64	1287	TGCAGGAGACTGGCATCATGATGGCTCAGGAGACAAACTGTTCTTGTTGTTCAAGGCAAATAAGTCAAAATCAGAACTAAAATACCTACCAGACAAACAGAAAATTAACTATGTGAAAAATCGAGGAGAGCTAATTGATCGGAAAAATATCAATATCACAACATCTAGCGATTGAATGTCAATCTTTTCATGTTTTAGGTTTGTATAGTTTTTGTGGACTGTAATTTTATATAATTAAAGTTGAACTGACAGCGTTTTAATTACTTTGCGGATATGAAACAGACAATATCAGTTAAAATATAAAATTCCCAGTTTATGCTTCAAAACCAACTTTATAAAGACGTTTTAAAAATAGGTTATATTTTACAAAAAATTCCATGAAGTACAGTAAGACATTGT…
CLocus_78958	1	603	46.19	95.24	43	48739	TGCAGCTCACGCAACACTCACCTGGGCAGGAGAGAGAGAACATGGAGAAAGAGGTGGAGAGGAGGGAGAGAATGGTGGGAGGGAAGAGGGTTGAAGAAAGTGGTGGTAAAATGAAGATGTAGGCTCTATTGTTGCAGTAATAAAAATACATCGCTGGGACCAAGGTTGTACAGCCTACAAAATACACATAGAGGATGACTCGTTAAGGTCTCGTTACATCTATGTATCTTAGTCTCATTTGTGTGTGAGACAATGCCAAATATCCAATTAATACCACTTTATTTGTGCTCTGGATTTACTGTGTATTTAAAAGCTATAATGCAAAAACATAACATCTCTTGAGTTAGTGAGCTCATGGAAAAACTGTAGGGACTTTGCTATCCCTCTGTCTTTTCTGGA…
CLocus_50285	1	604	46.19	95.81	107	32955	TGCAGTTTCATATTACTCAGGCAGTTTACAAACCGTCAAATAAAGAGCTCTATTTAAGTATTTTATTCCGTCTCATTTTCTTTAAAAAAAAAATGGCTTCATGTAACGGAGAGACATAATCAGTTTCATTTGATAGCCTGTTAAAGCCCGATGCCTTCTGCACTCTGTGATCCTATCACACTTGTATAGCTGAAACTGAATAGGAGACAACTTGTCCAGGCACACTCAGGGCAGGGAAGAGTCAGATGACTGGCTCACAGCAGACTGTGTCCCTGCAGACAGCACATCTAGTCCTCTGGGAAGTAGAAGAGACCTTTCAGTTACCCTGGGATGTAGTACAGGACAAGGTGTTTAGGCTCTCTGCTATATTTCACCCCACGATGTTTTGACAGAAATAGC…
CLocus_60636	1	605	46.19	95.81	211	39175	TGCAGGGTCAGCCTCTTAATGGAGATCAGGCTGTTGGACTTGGGGTCTCCAATCACCACCCACCAGCCCTCCTCACGTTTCTGAAACAACAACACAGTCAAAGGTTATACATGGTCATTGTTGAGTTTGTGCTTTTTGAATGAATCACTAGAGGAGTTCTGACAAACTGGTGGTGATGATCCATACCTGGGGGAAGAGTGGGGCAATAACAGGCCCAGTCACCTCTTCTTCTCTCTCCAACTGGACCAGAACCAGCACTGGACCTCCACTGTAAACACAAAGATATGATCAGACACCTTCACTTACTCTGCTTCTCTCATTGGTCTATAGATTCACTGGGCAGTAGTAGTAAGTAGCAAAGACCTTATAATTAACAACCTCCGAAGAAAACAAACATTT…
CLocus_38259	1	606	46.19	95.81	107	25559	TGCAGGCTCACTTGTCCAGGATGCAGTTGAGCGCTGAGCTCCAGTCAGACACAGAAGAGATCCTCAGCAAGGTGAATGAGAAATGAATAGATGCGTTGGTGCAGTCGAAGCTGTGGTAAATGGACTCTGTAGAGCAGAAAGACTCTAGTATGACCTAGTGTTGAAGAGTTCAGAAAGTAGAGGGTCAGATTTGAAGTGTGCTAGTGTTTTAAAATCTATGTGTATGGTTGTGTGTCCTGTCCAGGCTGTGCGTCTGATCCAGGCCTGTGTAGATGTGCTGTCCAGTAATGGCTGGCTGAGCCCTGCGCTGGCTGCTATGGAGCTGGCTCAGATGGTCACCCAGGCCATGTGGTCCAAGGACTCCTACCTCAAACAGCTGCCCTACTTCACCTCTGAGCA…
CLocus_5767	1	607	46.19	95.81	14	4018	TGCAGACAATATGGTCTCCCCTCTTCATGCTCTTCCATAATCTTTTCAACAGAATCTCCTCTCCTCCTCCTATACTACACACAGCAGTGGTCATCTTATTGCTCGATCCCCCTCCCCCCATCTCTGTCCCATTTATCCTGTATGACTAACTGGATGAGAAGCCTTTGGGCCTCAGCCTCTCTCTCTCTGGTTTGGGCCCCAGGCTGAAGCCATTATGGTTGTGCTCAGCTAACTATGCCTTTCTCCATTCTCTTCTCTTTCCTCTACTCGCTCACTCACTCTTGTCATCAAGGAGCTGACATGAGCAGAACAAAAAACAAATGGTCTTTAGCTAAACATCTGATCCTGTTGTGGTGTCTGGAGTTGATTTACTTTGGTTCTGTTGATGGTTTTTTGGTT…
CLocus_83452	1	608	46.19	95.81	208	51122	TGCAGGTCACACAGTAATGCAGTTCAGTGCTGTTCTTTAGTCACTGCACCCCAAATACACCATTTGCCCCACATACAGTAGCTAGAAAAAATACCTCCAGAGATGTGTGTACTCAACAGTTCGTCATTTGGATTTTTTGCTACCCAATGGGGTTGTATTTGTTGCCCTCACCCTACCAAAAATCAACTCCAACTTCACAGGTAATCAAAGCCCAAAGCAAGTGTTGAAAACATCCTGACTAATTCGACCATCATCTGTAAATTAGAAACAGACAGAAGTGCTGCTGATGCAGGGGTTTGTTTTACCTTTTCGTTTTCCAAACCTGACCACTGTCTGCCTCTAGAGGAGGAAGCCTGCTATGACATGTTCTTCAAACATTGAAAAATTATCCAACTTAGC…
CLocus_57302	1	609	46.19	95.81	106	37291	TGCAGTACGTCCAGGTAAGCAGCCAGCATGGCCAGACTGAGAGACTCTATCAGGGTGCTGTGTAACCACTGGGTCAGTTTGGTGTCCCAGTTGACACTGGCCAGTGCATGGCGCACCTTCCGGGCACATTTGTCCACAGCAATCCTGCGCAATACTGGCTCATTGGAGGCCTACGAGTCAGAAGGGTGGTGAGATGGTGAGACAACAGGGACAGGAACTTTGATAGTCATTCAAACTGAAACATGTCAATGCAATATTTCCATGTTGAATCACTTTTAAAACAAAATCGGCACCACATACAAAAGCATTTAGGTGGTGTTTATGAACTCACATTTTCATTGGCAAGCCGGGCCAGTCTTTCAGCTTGCAGAGCTTTCAGCACCTTATTAAATAATTTGT…
CLocus_35551	1	610	46.19	95.81	105	23895	TGCAGGACTACCTTACTGCTGTAGCAAACTGGCTCAAATGAAGATCCCACATCTGTATTTTAAACCATCCCTGTTGTCTTTGTTTAGCTGGGCTCTTTATACTGAAAGTAGCTAACCTTGATGGGTTAGCTCCAAATGGATTTCCTCTTTGGGCCAACATCCACGACAAGCATATCTTCATGTGTCCATTCGTCTACTCTGATACTCAGGGTGCATGAGGGCTGTGAGCTCTGGTGCTGAAAGAGAGAGGGTTCTTATCATAGCTTACCTCCCATACCAGAGGAGACAAGCATTCCCCCAGAGGAGAGTCTAATATAGGCAGAGGTACGCATGGGAATGGTTAGCTTCATCATCAGTCTGTATGGCTCATACGGTTGTGGGATGCACCAACCGCTGACC…
CLocus_43646	1	611	46.19	95.81	177	29023	TGCAGAAAAGTTTTGAAATCAGCCACACCCCCATTGAATTAGTTTTTGTTTTGTCGGAGGAGAAAAGCATACACGTTTCAAAACAATATGCTAATTATCAATGTATCTATAAAATGTTTTGCACAACTAACTTAGTTCGTTTTTATCACTTTACACATTTATTTTGAGATCCCTGTAAACATAATTTGCCTGATGACGCACGGGTGGAGTAGATTTCATGCAAGCACATTTTCGTCCACATTCCCTCTCCTCACCGCCTCTTGTCAATAACCTTTGACCTTTTTTAAAAAGGAGGCGAGAGAGGACAGAGGATGCAAGAGTTGAGAAAACCAATAGAGAAAATGCCCATGACAAGGAGACTTATGGGGGGTGATAAGGGCCATAATTAAGCCTCGTGAA…
CLocus_39469	1	612	46.19	95.81	45	26330	TGCAGGGTTAATCTTGTCCAGAACACTGTGGTCTATAAAATGACATATCACCTTAGATCAATAGCCCTTTAGTACATTCATGAATTGTAATACAAGAAGTTGACTTTTTCAATGAATGGTGATATTGGGTCAAAAAAACAATTAAAGGCCATACACTTCTTAGAAGATGTTGCTCGTGTTTACCATGGCTCTGTCTCAGAGAGTGTTTAACAGACTACTAACCATTTGATTATCCATCCAGTGTCCGTGCAATAAGAGCTGTGCCTGATGACTCTGCACAGGTCAATAAAGTGGATACACGGTCCGAGAAGAGAAAGCAGAGAAGGGCAGAGGCAGACAGTCTATTCAGGGTATCTGATGATTCTTATCAGGTAGCAGAATGACATCAATGTTATTTTT…
CLocus_134347	1	613	46.19	95.81	36	69669	TGCAGAACATTTCTCAACCACAGTCTGCAGGAGAATGCTGAGATGAGAAGAATTGAGGCAGTCTGTCTATCTTGCTCTTATATGAGAATGAGGCGATTCCAAACCAGGACAGCCCAGAAATATTTTGGGTATCTGAAATTGTCATGGCAGTTCTCACATAGAAACTTAATAATAGGGAGGGAGGATGTTTGACATGCTTTTTACATTTGTGTCACAATTTGTTTTTAGAAAATCATGATGAACGTTAAGAATCTGTTCTTAACTGGCTTGCCTAGTTAAATTATGGTTAAATAAAATAAAAAAATAAGTTAGCCTGACGACTCACATTAAAATCCTTCTGCTGCTCTATCGTTCGCTGCATACTTTAGTCTGAGACTGCCATCATTGAAGTCATTTGTG…
CLocus_31217	1	614	46.19	95.81	76	21243	TGCAGACACGGGGGAAAAAGATAAGGACACTCAAAAGGTGTATATGTTTGTCAGTATCTGTTAAAATGATCATGCTGAGAATAAACATGTTGACACTATGAATGAAGTGGGAGGGAAAATATTATCTACTTTTCTGCACTATTTTCTTAAACAAGCTTTATCAACTTGTTTTAGGGGACCAGCAGGCTATAGTCCTTCCCTGTTCTAGAACCGCTTACATTCAAACGAGCACTTGAGATGAGAATAAATCGGTTTCATCCCAGGGACCAGTGCCTATCCACGGTCAGAGGTTGAGAAACACTGATCTGAATGAAAGCACCGTACCTAGGGGTTGTTTAGGGGAATAGTGGAGAGTGGTTGTGGTACTGTGTGGTAAAACATCTAACTTACACTGAACAA…
CLocus_60839	1	615	46.19	95.81	25	39312	TGCAGTTAGCAGCACCTTTGACATGTGTTTGGCCAGAGAGAACAGCAGGATAAAACCCCCCTCAACGCTAAGCACCTCCAGCTGGACAGGGATGTTAAGGGGCTATTGTTGACCTACACCAAGGGAAGTGTCAATTACTTCTAAATAAAATAATAAGTGCTCAACATGAGAACAATTTCCGTCTGGGTTTGATTCATACTAACCATCATTACAATACGAAGCATTGGCTTCAAATGGGAATGCACTTCCTTTTAGCACATTAGCCTTAGAGACATTACAATGACTGGTCTCAAAGACACATACAGCAAATCTCTATATCAAAGCTATACAAAACAGATGCTTACTTAAGTGAGCAACAATATTCAACATTTTTTACCACATGTATAAACTCCAAGGAAT…
CLocus_61748	1	616	46.19	95.81	11	39867	TGCAGATTTGTTGAAAGGAAATAAATATATTATTGACTTAACTGAATTTGAAGAATAGCCTCGACCTGTCCTTATTATGATGAGCTTAAAGGAGAGAGGCAAGAAGACTTTCATTTGATTTGGTTTGGATACAAACCCACAGCCTGCCGGTTTCAGGGCAGACACCCTAACCACACAACCACTGAGATGGATAATGGAGAGTGCTGGGGGATTTGTAATGAATCCATTGTACATCCTAACTCGAACGCTGCTCCATGTCTCACATACTGTAGCTTCAGCAGCTCGGCTGTTCTGTGAGAGTGAATACAGATGGGAGTGATGCCCAGCAGTGGAAAAAGGGGAATAAACGGGTTTAATGAAACCATCATGGTGCAGTGAAAAGTCAGTCCAAGCCATCAG…
CLocus_39368	1	617	46.19	95.81	264	26272	TGCAGAGTTGCATGGTGTCAGGGTCCTCCTCACAAGTCCAGGCGCAAGCTCCTGCTAATGTCCAAGGTATCTGCTACCTGCCTGCACGACTGTCCTAACTCGGCACTGCAGCAGATCTATCTCACAGAACACTGAACAACAACCAAATATGTTGTACAGTATATTTTCACAGATGTGTTAGTTGCAATGCAGAGGAACAGAGAATCAATGTAAAAAGAATGGGACTAAAGTGGAGTTTTATGTCATGATTTTGAGCACTTCACGAGAACCGATCTGAGCAAACAATGTTATTGATTACTTTTTGCGTTACCCCTGCAATGTCTCTGGTTGTTTTTTCAAGGTCGTTATTTTGAATAGACAAATAGGGGTGGTTCTCAACTGTCGTCACCAGCAATTGTG…
CLocus_24676	1	618	46.19	96.09	49	16729	TGCAGGGAGATTGGTGGAAACGTTATGCATACTGCATATGCCTTTTTTTAAATCCGGAATAGCCTTTTCGAATTAATGTTAGAACATGTGGTGTGAAAATCCAATACCGGTCTCTGAGTGGGTCTGTTGGAGTAATGGGAAGAGCGGGTAAAATACGCCGACTCAACACAGGCTCTTTAAACTAGCCAGTCAATATCCTCACAGGCCAAGCTTTCTAGTTGTAAACCTCTCCTGAGGTCTGTTCAACTGCTGTTCCATTAGATGGATGTTTCCTGGTTTGATTCAGCCATTTGCAAAGGAAATGTTAGATATTCACGGATGCAAATTACAAAGACAATAGACATCACAATAATTATATGGAAACTTGGACCATGCAATACTACCACTGGAGGTACTGTA…
CLocus_50733	1	619	46.19	96.09	19	33247	TGCAGCACTAAAACCATAAAAAAAAAATAATCAGGCAGGGGAAAAAGGAAAGGGATTATTTGATTTCCATTGTTTCTACTAGGGCCAGTATTGTGATACTCATGGCAAGGAAACAAAGTATCGTGGCAAGGAAACAAATACAATTTATTTTGAACTTATTTAGCAAAACAGCCCTAACGTTGGAAACAAACATCAATATGTCATCCAGAGTCACATGTATTTATTTCCAAGCTATAGCACACACTATTTACATACAGCAGGTTTTTAAAGGACCAAAGAGTTGTCTGCTTTGTGTTTTCATTTTTGCCATGGGAAAAATATTGCCATACCTGCACTAGTTTATACTTTGCCTTGAAATCGTTTTCACACTTTAGCTGAATAGCTAATTTCCTCTCTTGT…
CLocus_102190	1	620	46.19	96.09	197	59261	TGCAGGTTACTATCAATAGCTATATACCGTATTTATCTGCTATTTAGAAACTTTTTTATAAAAATGACAAATCAAATAGCCTAACAATGAGGAAAAAAGTAGTCGGCTTGAGGATAAATTCAGCCACTATTTTTTGTTGAACTTGGGATTTGTCTGTTTAATAGTCTACACAAATGGGCTGCAATACTCAAGGCTACATTTAAATTAAATTAAATCCAACTTGAGAGACTCGTCTCCTGAAGTCCTCCTTTCTTGTGTGCAAATGTTTTCATCAAGGCCTTTAGGCCCAGGTTGCAGGCCCGGCTGTTTTCTACACTGAGTATTTCACCCAGACAGTCGTTCCTGAGACATTGTGCATTATATGTCAATAGCACTGCACACAATTTAAACTTAGTTTTG…
CLocus_6988	1	621	46.19	96.09	252	4773	TGCAGCCTCCTGCCCTGGGGACACAGTGGCCAACTTCATTTGTTGGCAAAGATGAGACTCCTGCTGTCTGTAGGACAGTCCCTCTGGGGGCTCCTCACGTTCCTCTGGAGAAACACAACCACACCACCTGTCACAATCCATACAGCATTCAAAACATACACCAGCACAGTGAAGAAAGACAAGATGGCAGGCTCTCACTCATACTTCTGGGGTTGACAGAATAACCCATTTCAGACTGATTCAGTATGCAGTGCACTATACTAACGCAACAATGTTTGCAATGACCAACATTAACACGAGCTTACTGGAAGACACATTTAATTTTTAATACACAGAAAAACAAAGCCACTGATTTCAAACAGTGCTCCAGGCTGCCAGAACAGATCCCACAATGAAAGC…
CLocus_16513	1	622	46.19	96.09	8	11391	TGCAGCGGGGTTGTGATTTATCAAAGGGCCAGGTGTCATTGGAAGGCTGACCACATGCGGCGGTGGTCGACAAAGGGGTTTGGGAAAACCAGAGAGGTCAGCAGTACAGCGCATGATCCCAGCCAGGGAGCACTAGGGCAGAACGGAACATGGGGAGGAGGGGAGTGGCGCAGTAATGAGGGGACAGTACGCCCCCTCCATCACCCAGCCCAGATTTACAATATTCTCCTCAACCTCTGTTATCCCTCGCTCGTATACTCCTCCCCTCCCCCGCTCCGGGCTCAGCTCTCTGCATCTGTCACTACCGCTCTTTTGTGCCTTATTTGTAGTCTACTGTTTTTCCCTCCAAGGTTTTCTAAAACAGAAGAGCCTTGCTTCTAAACACAATGGTGGTCTTTG…
CLocus_51258	1	623	46.19	96.09	73	33567	TGCAGCAGCCCACTACGATCCTCATCCTCCATCTCCATGATGTCAAAGATACTCTCCACACCCTGAGAAATACGAGAGATCAGCTTCAAGATCCACACCAAATCAAGATGACCATGATCCCTTGTCTGGAAAACGGAGAGTGTTACAAATGAATAGAGTCACAGGCAGTAGTGGATGTGTTACCTTGTCCATGCAGCGTTTGATGTGCTCAGAGGTGAAGTAGGGCAGCTGTTTGAGGTAGGAGTCCTTGGACCACATGGCCTGGGTGACCATCTGAGCCAGCTCCATAGCAGCCAGCGCAGGGCTCAGCCAGCCATTACTGGACAGCACATCTACACAGGCCTGGATCAGACGCACAGCCTGGACAGGACACACAACCATACACATAGATTTTAAAAC…
CLocus_34186	1	624	46.19	96.09	102	23121	TGCAGAGGACCACCTTGACTGTTCGAGCTAAAAGGACACAATGAGCCTAAATTCTGGTTGGAAATGGAAAGTCAATGAGATGCTGGGCTTGATCTTGGCCAGGTAACGTATCAGGAGGCTGCGCAGAGCTGCTGTGTCTTCCAGGAAACCCTATTGCTGCAATGTCATTGGTCGCTCTCAAGCCAATCACAACCTCCTCCCTTTTAGATGTTTATGTTATTGTTGCAGGAAGAGTGGGTTCACAGGTAGATACCTCAAATAGGAAAAATTATATTAAACTGTTCCCTGACTGTCCCTGCACCACCCAACCATACGTTTACTTCACTTTCAGGCATAAACATGAATGTAACATAGATTACTTTACATTCAATTCAACGGAGACTCAAAACAAGAAAACAC…
CLocus_747	1	625	46.19	96.09	36	856	TGCAGTTTGGGGGAAAACAGGCTCACTACAAATCCCCAAAATGTTCATACATGGTAGAAGCAGGTGAAAATACCACAAGGAATTAGACCATATTTATCCAGTTTTATTTCATTTAAACCATGCTCCGCTAATGTTTTGGATCTGATTCTAGTTCATGTCTGGCAGAATAGCACAGACATTTGATAAAGATAGTAACCATGCCAGGTCAGATGTTGTTGCTCATCAATTTCCCATCCATGACTTTGCTTTCACAAAATTCAGAAAAATAAATCAAGTGATGGAGAAATAATATGCCCTCTTACAAATAGACAAAGCACCTGAGAGTTTTACACAAAGATCTAACTCAACATACATTACCATTCAAAAGAAGTGCGCAATTCCTGTTTTCTTCTCAGCGAG…
CLocus_17736	1	626	46.19	96.09	194	12194	TGCAGAAGAGGGCTCTAATCAGATCACTGCGACATGTGAGTGCAGTATTTTATTTTTTGCCACCCAATGCTCTCCCTCCCTTCTTATTCTCTACTCTACTCTCCTGTATGTCTGTCTGTCTGACCGTCCCTCCCTTCCTGTCCCTCCCTTCCTCCATGTTTACTAAGTAAGTAAAGGAGCTCTTTCGTTCTCTGTTTGCTTGTTTAGTGAAAAATAACTAGTATACAGCCCATAAAACCATGGCTTTTGGGACAGACGCCTGATATCAATTTCCCCTCAATGACAATCTCTTGTTTTTGCATGTCCTCCCTATTCAGTATGTGGGAGAAGAGGGAGGGTAAGATAGATCGGTCAGGTTTGTGGAATTGGATTTCCATGGCAGATTGACACACATCACCA…
CLocus_2068	1	627	46.19	96.09	102	1727	TGCAGGAGACTGAGAAGGAGGATATTATTAGGGTAAGAAACCATCTTAATTGTTGTATTAATCACTGGATAAGTCATTGTTTCTACACTGTGTACTGTAGACGTATTGGAACAGACTGAAATACATAGAAGGATAAATGATCACCTAAGCATTTAATGTTGGTTCCCTTGGTCTCAAACAACGGCTGGTGTTCATGTCTTCAGGAAGAGCGATCTCGCAGGGAGAGAGTAAGGAAGTCTCGTGTGGACAATGACTTGGAGTCTATGGACATCGACCATGGAGAGGTGAGGAGGACCATGAATAATGCACACATGACTATAGCCTGTCTATAGCCACTGTAATCCACAGACAATTTTCACATAAACTATAAACATTACACACATGTAGCAATGACATGCA…
CLocus_30367	1	628	46.19	96.09	24	20690	TGCAGTGCAAACAGACTTTCATAACCTAGTACTCAGCATCCAACCTCTATCACAGGAACAAGACAAGGAGCTCTGTCCTGACTTGCACAGTGATAATCCTTGTTGCCGGAGGCTAGGTCTCACTGCACGCTTCAACTGGCTAAGCTCATCACATCTCTGAATACCTCACAACTAAACATGAATATTCTTTCAGTAAGTATACTTCCCATTTAATTGTATGCAGTTCCCCTCAAATGCAAATTAGTATGTGACTGTTCAACACTTGTTCTGTGAGAACAAATAGTACTAATTTAATACGTAGAAGTGTGGGGAAAAGTTAATACAGTGCCTTCAGAAAGAATTCATACCCCTAGAATTATTCCACATTTTGTAGTGTTACAGCCAAAATTCTAAATAGAT…
CLocus_49606	1	629	46.19	96.37	172	32560	TGCAGTCTGAGGAGAATCAGTTAAAATCAGTTCCGCTATGTGGGAGGCAGTAGGTCAGTCTGTGCAACATGAACCCCACCTAAATTATGTTTTTAAATGTCAAAGCACAAATTTAGGACATGATAAGATTAGCACAAGAACAAACTATACAGAACCGTTAGGTGTAGCCTCTGAGGTAGTGTTCAATTATGTGGGATGCACCATCAGGAGGAACAGGAGAAGGACTTCCAGGCAACTCAGAAGAAAGGGATGAAGCGTGGTGAATCTGTGGAGAAAGCCAATGTGAGTTAAATGTGATTGTCCAAAATCTCCCTATACCCTGTGACTCAGAACTGCTTCCCTTTTCAATGACTCAATCAAATCTGTTCTTTGCTTGAATCCAAAGTCTCCACAGTTTAA…
CLocus_33572	1	630	46.19	96.37	191	22715	TGCAGTGCGAAGCAACGCACAAAATTACCCAGAATTATCCTGAGTCAATCCTCACACATAACAAGGCGTTTTTGCTTGGTGTTGTGTTATTATTGGATCATCAAGTTCAAGTAAACTTCCTTTTTTCATTAATTAAAAAGTTAGATATCTGCTACAGCACACCGTTGGGAGGGTTTCATTCTAGCTGGGGGTTTTGTACCAAGGCACAGTTTAAGCAAATAACTACTTCCAAGTAAAATGTCTGGGAAAAGTGCACTTCAATGTCCTCACAAATCTAAACAAACTTCAGAAAGAGAGGCTCTACATGTGGTTCCTTAAAATAGAGCACCATGCCTCGGGTGGAAAGAAAACATGAGAAAACAACTTTGTTCCCTCATTTCTTTACTTAACAAACAATAA…
CLocus_41857	1	631	46.19	96.37	165	27799	TGCAGAACTTTGTTTATAGGGAGGCCTATTTTTCAGCACCAGTTTTGTCATATGATTTTCATTTGGAGGAAGCTATGCTGCATAAACAAACAGCGCCCTAAGGTACCACTGGCTGGTTAAACAACCACAGGCTATTTCCCCCTTACTGTATTGCATTGACCATTTTGTGTAGAACAACAACACACTCATAAAAATATGTATTTCACAAAAGTTTGATCCCTCCCAACAAATGTTTTTATAAAAGGCTAGATATGACAGATGAAAGGCCATTACATTTATTGTTAACAGCTTAATACTGTAGAGTTATATCCTATACACAGGTACAGATGTTATGTAGCGATGTGTCATTTTATACTGCCAACGTAAAACTGATGCCTCTTAATGATATCACTCATAATT…
CLocus_97787	1	632	46.19	96.37	73	57486	TGCAGACAAAAAATTGCATTAGAAAATGTAACTGATCAATGATAGGGACCACAACTACAGACAATGGGCCTACATGCCTACAGGATGGGCTGGTGTAATTGTCAGAGGTTTATGATTAAATTCGAAGCCTGATTAAACAATGAAGGATTGTTGTAGGCTAGTACATGGGTGAGGCCTGGGTGAGGATGGTAAAGCAGGTATCTAGCTCTGTGAATAGATGGGAAGCAGCAGGCTTTGTGTCAAAGGGCCTCCCGGGTGGCGCAGTGGTCTAGGGCACTGCATCGCAGTGCTAGCTGGCCACCAGAGTCTCTGGGTTCGCGCCCAGTTTGGGCTGGGTTCGCGCCCTGGCTCTGTCGCAGCCGGCCGCAACCGGGAGGTCCGTGGGGCGACGCACAATTG…
CLocus_55189	1	633	46.19	96.37	111	36035	TGCAGCATAACCTGTTTGTCGGCAAGCTTACAACAAGGGCAATTTGCTTGTAGGGGCCATAGTATGATTAACCTGTTCACTTTTTAATTGTAAACCTTATTCCAAGATTTAAAAAAATTACCTGCCACATTGGCATGCACATTTTCATATACCATTAGTCTGGTAATGAGGGCGTTAGCCCACCCACCCACACGCACACGCCTGCATGCACACCTCATTCGCCAAAACACTCATGCAAGCACAGACACACACATGATCACGCACTACACTTAATAATTGCCAGCAGTATACCACCCTGCATCCCACTGCTGGCTTGCCTCTGAAGCTAAGCACGGTTAGTCCTGGTTGGTCCCTGGACAGGAGGCCAGGTGGTGTTGGAGGGCCAGTAGGAGGCACTCT…
CLocus_6417	1	634	46.19	96.37	26	4428	TGCAGTGAAAATGAAAAATGCACACGGCATCAGCAGTAATAATTTACTCTACAATAGTTTATTTTAGCAACTATAGTATTTACACAGTAGCGTTGGTAGGAATTAGCTTGCAAAAAAACGAATAGTGCGCCAGAAGTTAGATAATGTGATTGTAATTTACTCTGCCAATTGTCCATAGGGTTGGTCATTGTGCAACAACAAAAAACAAACATCTAATAGAACATACATTTAAAGACTTTCCAAACGTGGGTATGTTGTAGTAGACCCGCTTACCTCATGTCAAAAATAAAATTCCTTCAAGTGCGCCACACTTGCACACACAAAAAGCATGAACTTGTGGGCAACTTTTATTTTGACATGAGGTAAGCAGAGAGGAACTGACCTCCAAGGAACTGCACG…
CLocus_35432	1	635	46.19	96.37	12	23832	TGCAGTCCCCCGCACTGTCATGTTTATCCACACACCATCTGAGTCACATAACCTGTTTGTTGAGTTCAGATGGGCCTCCATGACCCTGATTATAATGCTCAATGAAGACACGGAGGAGTTTCTCATTGTGGTATTGGACACAATAATATAATACATTTTTACAAACTCAAATGTGTCAAGTGATTGTGAATTGACATTTTGAATATGAGTTGACTGCAAAGACTACAGAGAATAGCAATACTGTGTACATTACATTATACATTATGCAAAATACACAGGAGGCTGCTGAGGGGAGTACAGCTCATAATAATGTCTGGAATGAAGTAAATGGAAGAGTATCAAACACATGGAAACTATGTGTTTGATGAGTTCGATACGATTCCATTCATTCAATTCCAG…
CLocus_18118	1	636	46.19	96.37	77	12470	TGCAGACACTGACAGAGTGACAGGACAGTGGGAGAGGCTGCTGGGGGGATTTCCTGTTATTCTGTGGTTAATGGAAAATTGTTTGTTAATGTGATTAATCATATTTCCATTGACCACTTTTCAGTTGTGTGAAAGATGCTGAGGTAATAACCATCAATGACTGTAAGCACACTCAAAAAGAGAGTTCTTAAAGAGTTCTTCAAATTGAAACTGTAGGGGAATCCCTATAAGTTCTTCAAATAACCCCTTTTAATTGATAGTTGAAGAACCTTTTTGAAGGACCTTTTGGGGTACATTTTTTAACTCTTGTTGAACCTCAGGAAGACTATACGAAGACCATGGTGTGTTGATTTGTCCTTTAATTTAACTTTAGAACGGTGAACCCATTTTGAACTTTGG…
CLocus_45145	1	637	46.19	96.37	102	29919	TGCAGGATTATTTTCCTGCTGTAGCAAACTGGCTCAAATTAAGATTCTACATCTGTAACATCATAGCTCTTCAGTTTAGCTAGAGGCTCAGGTTATTCAAATCAATGCCTGGGTAACTTTAGCATTACAAGGGTCATAAAATATTTACACAACATTGACTGCGTTTAAAACATATTTTCCACTGACTGTGAAAGGCACTTACTGTACATTTAAGGGGTGCCATTCCTAAAAGGCCATAAAGTTCTTATAGATAGCCCCAAGGCAGCATAGGTCATAGGAGGGAATTCTCATATGCTGAACATGGATAAGGAAAGTGGTCAGGTGATGCAACCAAATTTTCAGAAATGACAGATACTGAACTGCCGCAGTAGTTCAAAAACACAGAAATGCTTATTTTGG…
CLocus_41656	1	638	46.19	96.37	48	27663	TGCAGTTGCAAAGAGTAGCATGTAGTTTGATTACGTTTTATGTAAAAATTTTGGATGCCTCTGCATTTCTTTAATCTCGCAGAATGTACAGGTCAGGCTCACAATTGATCTAATAAAACGCTCAAATATTGTTTTCCTCATCTTCATTGCATTAGGTTTTATTTCATAACTCATGGATGTCAATAATGGAAGCTATTATGTAGCAGTATATTCAATAACAGAATTTCCCTGCTTGAAATGCATGCAGTATTGATTTTGAGTTTCCTGGGTCCATGAGGGAAAGTAGCGTGGAAGAAGTTGTTTTACTCCACTCCATCAGCATTGTCAAACTCCAATGTGAAAGATAACAGCATGACCTGGGTCATTCCATGAAATGAGGGCCTTTTGCATTCCTTTGAT…
CLocus_58105	1	639	46.19	96.37	269	37751	TGCAGCTCCCGTCCATACAGCAGCCGATAGGGTGAGTACTCTGGAGGCCTGGACGCTGCTGTTGTGTGCAAAGAGAATTACCTTCAGGTTGTTCTCCCACCATTTCAGGAACCCGTCAAGGGACTTACCCATGGCAGTCTTGAGGGTGTGTTTGGTCCATTCATCCAATCCTGGAGGAGGGGGTAGGCGAGGGATATCTATTAACAATGGAAGATATTGAAATGTCTGATTATGTACCATGTAAAAACAAAAACTAATTGTAAAAAAAACCGAAAACAAACCATTGGTGACAGAATATAACCTATAACATCTGTGTCTTGCTCCAGAGTCCACGACCTCGGTCACTCAAGATTACCTCAGGAGAACCGTGGGTGTTGAAGATGTCCATCATCGCCTTGG…
CLocus_89255	1	640	46.19	96.37	34	53945	TGCAGACACACACTCCCTTCCAAGTCTTGTGGTTAACAGACAGCTTATCTAGAGAGAACTTGGTGACAGGTTTAATTCTGTGTTCATTTTTTACATATGTCCATCCAATACAACAGCAGAGGTGAACTTCAATTTGTTAGAAGTTAGCTCAGTAAATGTCAGTGTCCTGTGTATTTGGAAAAAGGTAAGTCAGGTCATGTAATAATGGTAAGCACACAGGTATCAGTTTACATTGCATTTCATGGTTATGAAACACTATAGTGCATGCAAGCAATGACTTTGCCACTGCATAGTGTTCTAACAAATCTCTAATTAAAGTTAAGACCACAAGCAAGATATTAGGTTTTCCAATTAACTTCTCTTTATCCACATTGAATAGCCTTTCTTAGGTTTCATAAT…
CLocus_1666	1	641	46.19	96.37	77	1437	TGCAGTAGTAGTGCCCCTACTGTAACTCTGCCCACAATGGGCCAGAATGATGCCAGTGAACCACCAGGAGGGGAGGGCTACATAGATTCTACCTAAACATGGTTATATAGAGCAATATAACACTGTCCAGCTGAGAGGATTGGACCTGGTCATGTCAAAGGTCACCTGTGTTTCCGGTTGTCAAGGTCTCTCAATGGGAGATGTTGAAATCAGTCATCAGCGTCTCTGCTCTTTGATGCATCTCTGCACAAGGCGACTGGGCTTCTGTGACCACAGAAAGGTGTGTGTTTTTTGGCAGGGACACACAAATACAGATGCTATTCTCAAACATTGGGGAGGAAAACACCACACTTTAGTGATTTTGGCCACATAAACTGGACAGAGTGTACTCCCAGGTGT…
CLocus_10389	1	642	46.19	96.37	186	6989	TGCAGGAATCCGTCTGCAGAGCTAAGTCTGTGAGCTCATGCCAACTGCGTCAGTCTTTCTTGTCTGCTTCCCAAATGTGCATAGTAAAGACTATAAATTATGTGTGTTTCAAAGGTTTCCTCTTGTAAATCACGTGTATGTGACAGCCCATCGACATACCATGCAGTATTGAGCTCTTGTAATTATGTCAATAACTACAGTCTTGCTGATATCATTAATAGGTGTGGTTTTATATTTACATAGGGGATCATCATGACTATAAGTGCATTGTCAGGTGAAGTTATTCTTATGTCACGGTACTTAGTAGTGGAGTGATGTTGCATAGGGTTTGATGGGTATTCTTTAGATACTGTACACACAGCCGACCCAGAGATGTTCTCCCTCCCTCCCTCCCTCTCA…
CLocus_49149	1	643	46.19	96.37	333	32316	TGCAGGCAATGGTTTTATTTAGAGGAACATGATTAAACTAAAGTAAAATGGAAATATCACACCGTCATAGAAGATGCTAGGGGAGTGGGGAAAGGGATAATATTATTGTGATCTGAAGTGATGATTCTGCCCCGTCCACCCTCATTATCCAATATCTTCCTGTAATTTGAGGCTTGCAGCTGCATGTTGTATTATGGCCCTGTCTTCACTGTCCACACTCTCACTGGAAACTCACATTTCAAACAAGATGAAGGGGAAACACTTGACATCTATACCTGCCAATGTCTGTCAGCCCTTAGTTTTGTCCATCACAGAGAGAGAGAGAGAGAGAGAGGGGGGGATGCTGTCATTTAAGCAAGTTATTGCACAGTACAACTGTACATGCAGTCATACCAATTT…
CLocus_31662	1	644	46.19	96.37	238	21495	TGCAGGTAGGATGATGCAGGCTGGTACCATGACGAGCCTCCTTCCTGTAGTGCCACACAACCCTGCTCAGGTAAGAACATTTACAACCACGAATTACCAAGTAAGAATTCCAATAAGGGGAGGATCCATGTGAGAAGTTATCACAATGTTTCTCTGTCCCATCTGTCTCTACCGCCTCTGTTGTTTAGACCAGCAGCTGTATGGCAGCAGTGAGCAGTCCAAGATTTCGGACCCTAGTCGTATCCGCTCACGCATCCCCCCCAACATGCCAAAGCTCTTCATCCCCTCCACCGTCACCAAGTTCCCCCCGGAGATCACCGTCACCCCGCCTACTCCCACCCTGCTCTCCCCCAAAGGAAGTATTTCAGAGGAAACCAAGCAGAGACTCAAGGTGCTCTC…
CLocus_22492	1	645	46.19	96.37	181	15463	TGCAGATGCTTCTCAAAGGCTGTAACGTTAACCATAACCTGAATTTTCCCATTTAAAATGTCATGACCGACGGGAGCTGATTCTGTCTCCCGCTTGATAACTTCGGATAAGGCTGCCAACGGGGAGAGTAAAGATGGCGGTGTGCAAATGCGTTGGGGCTCAGCAATGTTGCCTATTGATACAGTCCTCCTGATGTTAAATCTTCCACTTTAATTCATGTGAAGTCTTACCTGTTTTCTCTTTGATCTCGCAGAGGACGCTGAAGAGTGCAGGTTTCATTCTGTGGCAGTTCAGTCCATGTTTCCTGTTTCAGTTTGAGACAAGAACCAACATTGAAATATAGTCACTATAACACCTCAGTTGTTAAAACTTTTAAGATAATAATGTGTCTTTGTTCTT…
CLocus_28114	1	646	46.19	96.37	140	19112	TGCAGTCAGTTTTAATCTACAACTATATTTTAGCCTCTGAAATGTATCATTGCCCTTGTGGAAGTACACAGAGACATTATCTGAGAAGCAGAAATACACCCTTAATAGATGTTATGGTTCTCAATCAGTGTAAATCTACGTTGGGTAGGTACCTCTCTCCTCCACCTCTGAAGCAGTGGAGCTGTGTGGGTCTGAAGTCAATTGGGTTTCTCCAGAGGCCTCAGTAATGTAATGAGGAACTGGTCTGAGTCTGACTGAGGGTTGTTGGGCTCCTTCTCTTCTCCACAATCACATAATTAATCTCGTGCTTCTACAATGCACAAGGAGGGAGAAAGAGCTCACCGTCTCCATCTCATGACAGATATGTTTGTATTTGATGCGTCATGGTAGTGTTCTGTG…
CLocus_82850	1	647	46.19	96.37	30	50723	TGCAGGACACACACTTATAGCAATGTAAGTATATTCTAGAACTTTCTCGTATTGTGTGTGATATCTGTGCTCCGGGCTATTTTAGATGCAGATGAAACTATGCGGACTTACCAAGCACGACTCCAAGGGTAGCTTGACGATGGGGATGATCTTCAGTCTTTATACCGTCTAACATCCTTGGGTACTTGGATTGGTTTCTCTTCAAGAAACAGCGTTCCAGTGACTCCGGACCTGTTGCAATATCCATAACAATGTACTGTCAGACTTTCCTTCGCTTCAAATACTAGCTAAATGCCACAATATTTGCTGAGGCTACTTGCACACACATACACAAACAATGCGTTTTCCCAGATCGCTAACTTTAAAAAAAAAAATATTTAAAAAAAAGTCGTCCCAATG…
CLocus_27979	1	648	46.19	96.37	110	18986	TGCAGCACCTCATTGCATTTGATTACACATTGGATAGGAAATCTTTGCATCTCTTGAAAATATGCATTTAAGTGGATGTGAAACAGTGCTCTGTGGATGGTTTCTGGACTTGGGGATGGGTGAGGGGCGAAAATCCTTCAAGATTTGGTGGATTGAAAGGATGGAAACAAATAATGGATTTAGTGGTAATAGGAAGAGGGAATTATGTGATTTTTCTCCCTAAAAAATATGAGCAGTTTTATAGTAATCGTGTGGCCACTGAAGTTGTTTTGCAACATCCTGTTGTGTTTGGAGGCAGATTTATTCTCTTTAATAATCCGCTCATGAAAAAGGGTGCAGTGAGAAATCCACTGGAGTGTATATGTGCAGCTACTTACCATATTCTTGAAATTGCTGTAC…
CLocus_12616	1	649	46.19	96.65	26	8642	TGCAGATGATGTAACTGGTCCTCTGTTTTGTGGAAACAGCAAACACGTATGACAGCCAGTCTGCGGTAAGACACGATAATATCAGAACCAGTGACATTGCATCTGCTTTCACTTCCTTTAGGAGGCCTGTTGTATTATCTGGGGGGCTATCTAATGAAGGATGCAGTGACAGTCTTGTTACATGTCCTACCTGAGGAAAGACAAAGGGAGGGAATCAGACTGACCTGTCTTCAACTCAAGGCAAAACAACCCCATTAAACAGAGAGGTGAATGATAGACTCTGTCAGGGAGGGAACAGATCATCAGGAAGCCACTAAGTTTTCCAGAACTAGTGGAATGAGTCTTAACAGTTTAGTTCACCATCAACTCACCCCGTGTTTGAGCTAGGGTTAGAGTCCC…
CLocus_21600	1	650	46.19	96.65	209	14880	TGCAGTCATTTCACTTGTGAGAGCAGCAACCAAAGTCAATCCTGGCCTTAAACTGAAAGCTTTTCCTACTGTAAAATGGGAGTAGCAGCAGTAACATGATGCTGTGGTCTTTTCAATTAGGCTGCATAGCATCTATCCCCAGTACTGTGATGGTCACACAATAAGAACATTGTATTAACCCTTGTGTGGTATTCAGGTCTGTGGGACCTATTTTTAATGTTTACTAAAGAAAAATGATCAAATTAATTATTTTTTCAACCTGAGACTCATTGGCCTTGGCTCATTTTCTGTGAAGAACATGTAAAATAACCCATGTTCATTGAGTGCACACTGTGCACCCCCCTACAGATGCATATTACATACAGTATGTGGTGTTTGGGTCCACTGGACCCGAGGTTA…
CLocus_3149	1	651	46.19	96.65	24	2356	TGCAGCGTCCCACGATGCACGTCCTGCTCAGCAAAAGGAACTGAGCCTACTTGTAGATCACCTGAGAAAAAACAAGAAAATTACACTCAGACACAGTGACTTATTAATGAATGCAAATATCAACCTAACAGGTATCACATCACAACGAATCACTCAGTGATCAGTATTTACCTTTGGACCATTTTACCAGAGGAGGGGGGACACCTGTTGCTTGGCATGCCAGAGTGGCATCACCTCCAACGGCTACCATCACAACCTGTTTCACCACCCAGATACTGGGTTCCTCTGTAGGGAGGGGAACCAAGATAGAGCTTAAATAATAAACATGACCAAAACATGTTTATTATCTGCCAATTCGGCAAGACAAGTTCACAATGCTATACATGATCAGAATAGCAA…
CLocus_81432	1	652	46.19	96.65	10	49998	TGCAGCACCACCTGAGAAATCGAAATCAAATATTTTTTCCCACCAAATTAGTGCACTAGGCCTGTATTACTCCTGTATGAGCGGAGAAAAATATTAGTCAGACAAAAATTCTCAGCAGTATGGATATAAACCCTACATGCGTGGCTGTCACACTATGATGTTGAAGCTCTGTAGTGTGCAAGTGCTCTGTCCTCGAGTACAACCAGGACATTTAACATAATGAACGAGCATTGCCTTGAAATGATGAAATTGGGCTTTGCCTGTAATCCCCACTATACACATATGCAGTCATTATAATAAGACGCACAGCACACTGTACGCAATCCTTTTACATCAGTCAGATAATGAGCCACTAGAAAGCTACATCTGAGCACACTTTATCTCCATCACAGTGACACA…
CLocus_25737	1	653	46.19	96.65	186	17431	TGCAGCCCTCAAGATCCACAGGGCCAGCCTCACTGACCAGGGCATCTACAGCTGTGTGGCCAAGAACACTGCTGGACAGGACACCATGGAGGTCAAACTGGAGGTGCTAGGTGGGTAACTTGAGGGATCTGATTGATCAATGTGATGCAGCTTTTCTCTTTCCAAATACTGTACACCCATGTATCCTTTTGTCAGCTGATAACACCCCTTACCATCAGCACTGAAAACTAACTGAGCCAAACCATTACATGTTAAAAGAAGTTCACACAGCAAGAACTGTAATATTCTAGGTAGAGTAGATACCTCCAGGTTTACATGAGTGGTGCTGAGCGATTAACCAACATTTAAACAACTAATTGACTGACTCCGGTTCAACTATTTGAATTCCATTTGTTCGTT…
CLocus_27482	1	654	46.19	96.93	71	18650	TGCAGCATAGACCTAGATTCAGCTCTCCACTGAGGGGGAGCTTTGGTTTTGTTGTAAAAACGCTGCTGTACCAAACAAAAGGAAATAAATAAGCACAGCATGGTCTTCATAAACCTGCGTGGATTTATTACTCATGCATTCTGCCCATAAACAGATTTGTGACTACATACCCCTCCAGGCAGTATCTCATGTTGTCTAAAAAGCCAAACACAATTTTCTTTAAATTAGACCTGTGGTGAGAGGCAATCTTGCTGTTTTGGAATGAGTCTGCTAAAATGAGAACTCTGCTGTGTTAGCTACAGGTAGCACTAAGCTTGGAAGACAAAGTGGGCTTATGCATAATTTTACAACGGGTGGTTCTAATCCTGAATGCTGATTGGTTAGAAGCGCATTCCAGCC…
CLocus_122311	1	655	46.19	96.93	167	66469	TGCAGAGCAGAATGCCTAACACCTCTTGGAGAGGGTAACTCAACTACTGTCGGACTAATAACCTCAGTGTACCCACAAACACTGCACAGAGTGGGACACCAAACTGATCTGGAACCAGGGGAGAGTGTGGGCCGCTCACATACGCTACTCTCTTTACTGCCTGGCACGTTTGCCTACATTGGGTCTCATCAGTCCTTTTGCAGGCCTGTCAAAGCCATGCATCCCAAAAAAGTATGTATACAAATATGCAAAAAAATTATAATATGGCAGAGCCTAATTTTTGCCTGTACCTGTCAACACAAATTTGTTTTTAAGTAGCATTATTCTCCAGCGGGGATTAAGGGAGAAGCATGTCAGATGAGGTATCCTTTTAAAAGGATGCAGTGTAATTCTAAAGCT…
CLocus_42402	1	656	46.19	96.93	168	28206	TGCAGCCTCTCCTCCTCACCCCAGGGCCCCCTCTTTAACACAAATGTGATGGGGCCTCTACAGAACACTGAGAATGAATGAACCCAAGGATAACAGACGATTAGCCAGAGAAAATGATTACAATGTGATTCAAATTGGATGCAAAATGTATGAAGATGTTAATGTATAGCTGAATAATTTAGTGCATCACTGTCTGCTTCTTTTACGATCTGTCTGCCTCTAATTTGACTGCCTCAATCACAATTTTAAGTGCACCAGACAGTTAATTTCATTTTCATGCTCAACTACCTATCCATTGTTAGAATATAAAATGAATAATCTGTGACGCAATATGTAGAATCTATGAGAATAGAAAGGTTCAGAACTTTTGTGAAACATCACAACCCAGTTGAAAAATAC…
CLocus_105302	1	657	46.19	96.93	125	60532	TGCAGTACTGAGGCAGGCAGGGAGGGAGGCAGGCAGGGAGGCAGGCAGGGAGGAGTTTGGATATTACTGTGTGTTGTTAGAGACAACACTGTATACTAATGTGCCATAGCCATATTCAAATCCTTTGGGATTAACCTCTAAGAGCAGGATATTCACTCACATAAACTCATAAACCCTTATAAATCTGAAACACATGAACCCTCGGTGGGCCAGGGAGACCACATGCAAACTTCAATCTGTCTATCAGTCTTCTGGCTCACGATGCAGCCTGGCCCATATTTACCACATACTGTTTTAGGCACAAATTCATTCCAATAACAATGTGCAGTGTCCCACACAGAGCTATTAAGTCAGTAATGAGCCTGGGAGCGCAAATCATAATCTCATTGATATGGACTT…
CLocus_38492	1	658	46.19	96.93	201	25732	TGCAGAATGGTGGAGGAGTAGAATGAGGGACATTAACATTACATTTTAGACATAGGATGGACATACTATGGGCTGAGAAAATACAAGATATGAGATTGTGAAGAAGAGAGGAAAGAGACGTTTTTATCCTGTTGAGTGTTGGGCCACTGGAACCCTCATCACATTGAACACAGAGTGAGAGCTGCTCTTCTCACTCTTCTCAGTAAACAAGCTTACAGAATCAATCAGCCAGAGGGGAGCGGGAGTAGGAGAAAGGAGTCCAGGCTCTTTGTGAGAGCGTCTTGTCCATAGTGTGTGCTGAGAGCAGCAGGGCCATGGACTCCCATGGCTATGTGTCCTCCTCTGTCTCATCCCATTCCTGCACCAAGCCAAGGTTAACAGGTAGAACTGGCATCCACT…
CLocus_52401	1	659	46.19	96.93	88	34304	TGCAGGTAGGATGATGCAGTGCATACTCCATGCGGCTTGTATCCATCCCCATTCACAAAGAGCGCCACTCATTTGGTTACCAAAGACGCTCTCCTCCAAACGTATTTCAATTATTCAGTCCTATAATTCAGTATCAACGTCAGGCCTAGGCTACACTATATATACAAAATGTATAATTTATACATGAATAACTTAGAAATGTTTTATTCATATATAGTTTTCATTGTTTATATCTGTGTCCATATTGTCCATGTGTTTCTAGCAGATAGACCATATGGTTCAAGAGAAAATAGCATAATTAATTTAAACAGCATCTAACCAACAATGGCATTATTTTCAGTTAACTCTGCAACTGTTCTATTGACTTTTTTCACAACTGCCAGCAGTTTGGCGCTTTAC…
CLocus_22701	1	660	46.19	96.93	223	15586	TGCAGATTACCCCCTTGTCATCACTCTCATTACCACTATCATGACCATGCAATCTGGGCCAACCTCAGTGTTTGGGAAACTGAGATCCCCTTCCCAGGCTTTAGCTTGATTATTCAAAGGAACACATGTATCTGGTATCAGATACAGTAAGAAACAAAACAATAAAGCCATTTATCAACTCCTTGGTCGTTGTTCTGTGTTTGGCCTAAATTTCTTCCAGTCTTGTCACTGCCTAGAGTAAACTACGGAGCCTCTGAGGGGAAACACATGTTATGTGTTGTACATGCCAGTTTGAATGAACTACTTTCCCCAGAAAAAAAGGAACACCCCAGGGATACAGGCAGGTTCTGATTGCACCACTTAATACAATCCCTGTGGACAGAAACACATATGATGCAT…
CLocus_11630	1	661	46.19	96.93	6	7861	TGCAGGGCCTGACATTATTAGAGCTGTCTGAAGGTCACCCCTCTCTCCCCCCGGGGCCGAGGCCTCGTCTCCAATAGCACCTTACCCACCATTCTGCTGGCCTCACACTCTTTGACACCCATCAATGGAGGGAGCAGACATCAGGTCAACATACTATAATTAGTACTGGACATGTTCACTATTGGACCTGGTTTGAGTCCCCTCTCTCACCTGCCAGCCTGGACATGAAGGCGTCTGGCTCCTTTATAATTAGCTGTTATCTTATTCAACATTTTCACTGACTGAGCTGAGAGGCATATAGTTTGGATTTGTGGGGGCTTGTTGTGTTATGTTGTTTTCCCATTGTGTGTTGGTATGCCCCTATCAGCAGGGACAGTCCATTTCTGTTGTCCTTGTTGA…
CLocus_18757	1	662	46.19	97.21	181	12917	TGCAGCTTCTCTAATTCACAATAATCTGAGCAGAAACAATTATGGAGGACATGGTAGATGAAGTCCAGCCATCCTAACACATTACACGGACTAACACTGGCCCCCAGTGGCACATTATCGGCCATCTTAACTCACAATCAATACTTTAACGTACACACTCACCATCCTCCTCCTCAGTAGACTGACACGGGAAGGCTGGTATTGTAGAAGACTGGAGGGAAGCAACCACTTCACCGTGAGTTATACAGTCTCTGTCACACTCATCCCTCAAGATATCATAAATGTCCAGGAGGATCCAGAGGCACATTAATCAGACACATTAGGCAGCTAACGGGAGAATACTTACGCAGGACATTAAGGCTGTCTTGGGATCTAGCCCAGGAAATGAACGACTCGCCA…
CLocus_55434	1	663	46.19	97.49	101	36191	TGCAGCTCTGCCAACTTCCTGCGCTCCTCTTCCCCTCCCGCTCCTTCTTCCTCGTCACCTGGGCAGCCGCCTCCTGCATCACCCGGATCAGTGACCTCATCTCATGCAGTGCCCGCTCTGCCACCATCATATCCTCCACACTGGAGAACTCCCCCTAAACAAGCACACAGCCATTTACACATATTGACGAGAGCAGGAACATAAAACAGGATGGCAACAATGGAGATGTTTACTTTCCCCCATACTCTGATGAAAAACCATGATGGAAGAGTTCCACCATTTCACATGTGGTGCTATAATGTCTATTGAAAGTGCAATTTAGGCCATTAAAGACTCATGCCATTATAGATGAATGAAGAATAGGATCTAACTGACCTCAGCTGTCGTGCGCACCACCTC…
CLocus_63679	1	664	46.19	97.49	173	40894	TGCAGAGACCAGGGAATAGGGTTTTACTAGGACACAGTAGGACTGACTGAGGGTACCGGTTTGTGAAGAGCCCTATCTTTACAGGGCCAGTGTGGAACAGTGGTGGGAGTTGGTGAGCCGTAACCCAGTAAGTATTTGGATACCCCTGGATGTTAAGACATTCCACAGCAGCCTCTCCCCCTCCCTCAGGCCTGGCTTCCCCCGACTTAAGTGAGACAGCAGGCTCCCTCTCAGTTAACAATCAGGCCTTTCACTGGCCCAGAGCAGCTTTACCATTTAATGAGCCATGGAGGTACTCTCAGATCAGGCCAAGCTCAAAATAGGTCTCCTCATCCCTCCACTTAAACATTTCAAAAATACATCTGACTGACACATGCTATTTTGGGTCATTCATGCAGA…
CLocus_107180	1	665	46.19	97.49	136	61262	TGCAGAGCAAAGCTAGTATTAGATTTCCTCCCTGTTCCTGTCTCAGCCACACTTTGTGGATTACATAAGAACCCCCCCACCCTCACTCTCAGGCCCAGTGCCTTCACACTCTGCCACAAGTCAACAGCCAAATATGAATCCCAGTAACCATGGTGTCTCAGACATTCCACCAATACACAGTAAAGGAGCTGAGACCCATCACATAGGCCTAGTACACACACACACACTTAAGTGACAATGCCCTAGAAGCCAGTGTTTTGAGGACATATTGGCATGGGGGTTAGGCCCGAGACGAAGTCAAGGGCCGGCAAACTGTACCAATATATCCTCCAAACACCGGCTTCAAGGGCATTATCACTATTTTACAATGTGTTATCAAAATATTCAAATAATGATTGA…
CLocus_40099	1	666	46.19	97.49	124	26729	TGCAGTCTTTATCTGATAGGTGGGAAGGTACATGGAGAATTCCACACATTCCACTGTCCGGCTCCGAGAGAGAAAGCAGCCAGGGAAACAGAGAGGAGGGTGGCAGAGGAGATGCATGAGGTGAAGGCCAAGAATGGAAGAGAGGGATGATTTGGTTTACCCAGGGACTATAAATATCAGTAATATGAAATCTACATGAAATTAACAAATATTAAGATAAAAACACAGAATACAATGTTTTGTAATACAGGCTATAATTGGCAAGACAGAAACCATCAGTCAATCAGTTGCAATACGACTAGGTTCCAGATGAGAGGAATGCAGAGAAGAAAAAAATGAAGAAAAATCTGGCTGTTTAGTTTTAAAACAATCAAAGTACTACTCTATAATTTAGATAAC…
CLocus_49669	1	667	46.19	97.49	182	32638	TGCAGGTACAGGCCGATAGAGAAATGCGTCAGTCTCCTGCTCCCATTCCCCAGCACTACAGGACTCACGCTCAAGGAGAAATTGAGCGAACAAAGTGAGGGAGGGGAGAGAGGAGGCAGGGAGAAGCAGAGAGAGGGAGGGCCCTGATTTGCAGTGCAGGAGGGGAGGGCGATATGTTCTGCGGTGCTCCATCTCGCCTGCATGTTTCTGCTTGCAGCGAGCAAGAGAGAATTCTCACAGGCATAGTCAGCACAGGGCAGAGGGGGTAGAAAGCAAACATAGGAAGGATGGGGGGGTGG
CLocus_41723	1	668	46.19	97.49	20	27721	TGCAGAAGTCTGGTTGTACAGCCATTCATTTCTATTTCCTCTCATCAAAAAACATTGGCATTTCAAACTGCATCAATTCATTCAAGTCAATTCCAATCTTTCCTGTATAAGCACGTTTGCATTGGCAAACATTTTTCAATACACGTATATCGATCTCTTCAACTCAGAGCTGGTGTAGGTTAGCTTTCTGAAGGACACAGGTCCAAGTGTACATGTATATGATGTGAGACCAACAGAAAACAAAACAGAGATGCTGCTGCATCATTAATGCTGAGTGAGGAGTCATCATAACAATAAGAGACACTGTATGCGCTGAATGCACTAGCGCCATCTCTGCCAAGCTGAGGCTAGCAACACCAGAGAGACACCATGTTCTAGCTACACCCAATACTCTGATTA…
CLocus_42161	1	669	46.19	97.77	230	28036	TGCAGAATGTGCTCTCTCTCCCCTCACCCTCCCACAGTGAAACGGTCAAGAAAGTGTTACTCGGTGTCAATTTCCATGGTAACTGGGGGACCCAGACAGGGTTGTGCTCAATAGCACAGTCTCTGCTTCATAGCAAACTCATCAAACATTCCGCATGCTGTTTTGTGTTTCAGTTTGCAAATATGTCTTATGTGAACAAATCTATTAATTCATTTGTGCCTCTGCACCCAGAGACCAGTAAGCTACAGATGTTGATCTAGTTGGTGCAAGATAGTGATTTTCCTAACATCATATAGGTGCTATTCCATAGGGAGTGTCAGAACAACCACTACCATATGGAATGGCATTATGATCACTTGTGCGAAAACTAAAAGACATTTCAGAACTTCATTAGCCAAA…
CLocus_28767	1	670	46.19	97.77	329	19554	TGCAGTTGTAAAGTTTTGTGAGCAACCTCTGATGTCTATTGTACTGTATGTGTCGTTAATTGTCCCTCTTCTTCTCTCTCTGTCTCTTTCGCTCTCTCTTTCTCTCACACCTGTTTGTTGCTTTTTCATCATGCCATACTCCCGTATGTCCCTGTATGTGGGCATGTTTTGTTGATTTGCTCTATTCTACCCGTTCTATGGGGTTTCACTGCACATAGGCTGCTGTGTCCAAAAGACAGATGGTTCTGCCTCCTCTGGTCCAGGTAAAGAGTCCAACGAGGCTGCATTTGTCTGCTTTCCTGTTGATACCAGACACACAGGCATTTAATACAGACAATTATAATGAAATTACAATTACAATACATTTTCTATTACAGTACAACATTAGAATTACAATAT…
CLocus_13224	1	671	46.19	97.77	255	9049	TGCAGGCAGTACGTTGTGAGAGCTGTGCACGTCTTCAAGTCCTAATGTCTCAACCCATCACCACCGTCTCAGAACATCTTCAACAAAACATTCATCTCCAGAGAAACGGAGATCTGTTGTTCCGTCACGGTCCATACTGGGAGACTGCCTCCATGCTCTCACCACCAATACTTCTTGTTGTGGATGTTCATGTTTTCATCCCCTGAAACGCTTACATTATTTGCACACTTAAACGTGACTATAAAAAATGCAGTGTTCTCTTTTTACCTTGTATTATTTAGTCTGACTAATCAGTGTTTGAAGGGAAAAAAGGGCAGCAGTCTACCCTCGTATTAATCCATTCCATTACTAAACACATCCTTGCCTTGTTCCTATCAAGAATGTGAGCTATTCAATCAC…
CLocus_26697	1	672	46.19	97.77	201	18157	TGCAGTTATCAGTTAATCTGACTATTCTCTCATTGATTTGATTTCCTTATTTCAGCAATTTTAGGGCTTTTTGTGTAGTTGCTTCGTGTTTGTTGGGCTATATAACCCTGTTTTTAATGTTACTCCTGTTTACACCTATCTAGTTGTTTTACAAGTGTCTACAGAGAAAGGGTTAGGTTTTGCTTCTGGACAGGTCCGAACTATACTGGCCCATTAAGCAAGCACATGCCCTAAGGATATCCCAGTGGTTATGGCGTTCGTCATAAGTGCTGGTGGCCTGGGTTTGAGACCCGTTAGGGGAGTCACACTACCTTCACATTCTTATCAAATATGTTCATGTCATTATTTGACAACACCCCTATCTTACACTTAATATACAAACGTTTTTGTGGACACCCC…
CLocus_66168	1	673	46.19	97.77	126	42229	TGCAGTATGCTGTTCTAACAGTGGACATGAACCCAAATGCACTCTCATGCATTTGACCTGTCCTGACCATGAAAAAGGCTCAGTGGACATCTCTCTGATAGTAGCATGCCTCTGCATAGCTCAGCGCCGCAGTACTTCAAGGTGTCTCCTGTGTATCTATCCATCGCTACTCTCAGGAGTGATGCAGTGTCTCCTGAACTCTGCTGATCAACAGAGTAATGTAGAGGAAGGACAGATTTACGCTGAGACAACCATTATCCAAATAGAGTGTCTGTGTGTGTGTGTGTGTGTGCGCACATAAACAATGATCTGATTAGGTGAAGGTTTGAGAATTAGGATATTGAGAGGTTGACAGTAGAGAACAGCAAACAGCATAAAATATATGCCCACCCCTTCCCT…
CLocus_4785	1	674	46.19	98.05	98	3426	TGCAGCACCCAGACTGCAGGTACACACTCCAACACCATGCTTCTACCACATTTACAGACAAATACTAACCAGTAGAGCTCTCACATACGTTTATACAGTGTGTCTGAGTGTAGATCTGTAATTGTGTGTTTCAGGTGCTGGCGTCCCAGTGTCTGACAGCAGTGTGTGCCAGTGGAGGAGGAGAGAAGGGCTGTGCTCTGGCTGAACAGAATGAGATAGATGTCCTGCTGGAGGCTTTGCTCTCCCCCTGCTTCTCTGTCAGAGACGCTGCCCTCAGGGTGAGGAAATAGTGTGTGTGTACTGGGTGTGGGTCTTTGAATGTGTGTTAATGTCCCACCTCTCTTTCTGTCCAGGGCCTGTTGGAGATGGAGATGGCTCTGCCTACAGAAAGTACAGATG…
CLocus_125953	1	675	46.19	98.05	22	67495	TGCAGGTGGCATTGTAGCTATACTGTATTGGTAGTGTTGCTTTCAGTGTGGATTCAACTCCAATAACTCTCTCCTCTCTCCTTCTCTCTCCCTCCCCCTCTCTTACCTTATGCCTTCCTCCGGTTCAGCCTATCACCTGCCTTTTTGTGTTGAGCTCTCTCTCCTCACCCGCCCTACCCTAGGGAAGATGGCATTGTACAGTATTTGAAAGGGGGGAAACTCTGAGAAACAGGGCTCCCTCTATCTTTCTGACCAGTAATTAAGTCCCATTGTGCCTTAGTTTGCACTGTTCAGAGGACAGCCTAGCGAGGGAAACAGGGGGCATGGTAGTGTGGCTTGTACTGCATTTAAATCCCATACAGTGTATTATATGACACATTCTAGCATACATTTGGTGTG…
CLocus_39164	1	676	46.19	98.05	205	26141	TGCAGAACGGGCAGGTCTTGTACTGATACAGGGTCAACTTCAGGCCACCAACAGAAGGCTGAGAGACAGGGAAGTCAGTTAAAAGTCAATTTCATTCATTAACGTTACATTTACATTGCAAAATGTGGCACATTTGAAGGGATGTAACATTGGGCAAGCTACTTGACAAAAGCACACCACAGAGGTTGTTAGCTGACAAACATACGATTACTTTGCTTCAGGTATACATGGCCAGTAATGAAAATATTTTTCACATCTAATATTCTTGCCCAGTATTATTACCTTGACATCTTCTTCAGCAAGGTGATGTTGGACGGAGAGCTTTATTGTTTGATACAAGCCAAGCCCCCCTCCAAACAGGAACGCACACCCCAGGACCCTGCCACCGCGCAGAGGTGT…
CLocus_8713	1	677	46.19	98.05	105	5883	TGCAGGTAAGGTCTTGTATACCCATGCTTTTGAAAGCACCAGTGCACTTACACCTGGCTAAACAGGTATCCCAAGTCTTGGTGGGCGTGTTGTACTATTATTAAGTTGTCAAAAATATCTTAGAAATGCAATAACAAACACCCTCTGGTTGCTAAATAATCTTAATAATTTACGATAGGCCTAAGTGAAATTCAGGAGAGAGTTAAACACATTTATATTTTAAAGAAAGATAGAGATATAACAGATTTAGCAATAACAGATAAGGCTGCCATTGATTTAAGTAACTAACGTCTTAAGAGAGTGATTTTTTTGCTATACGATTATTTTCATGGCAGACTAATAATGCACATCCATCTGTTTCTGTGTATTTCTGTGTATTTCAGGTCAAGAGGACTATGA…
CLocus_108532	1	678	46.19	98.05	48	61916	TGCAGACTTGGAGAAACAAGTCTTAGGGGAGAGTGGGGTAAGTTGAGCCGTTTTTACATTCAGCATCACTCCATCAAGGGAAATATAGTGTTCTTTATAACAAATATATCTACATATATTTCAGGATGTTATGTCTCCCTGAAAATAATGAGAGTTAATTTAAAAATTACAGTTTAGACAACATAGCTTGTCCAAAAGTGGTGTCTTGGCACAACTTACTCCAGGTACAGGGTAAATTAAGCCACCTACAAATTACCACTACCTTTTTAAAACCATTTCTACCTTTATTTCCCAAACACTATTTAACACAGTCACAATAGTTGTTTTTGTCTTTTAATAATTTTAAGCATCTTTTAACACAGGATTAACACCTGACAAACACTTTGTACTTTCTAAAAT…
CLocus_70312	1	679	46.19	98.05	16	44268	TGCAGCTCTTGCCATCGCTGTCTTTCCAGCTCTCTTTGTCTCTCGCTCAGTCTCTCGTTCTCCAACTCGTTGTGTTTCTCTCTTTCTAATTCTTTTAGCTTTAGCTCTCTCTTTCTTGCATATTCTAACGGTTTCTGTCTCTCCATGTCCAGCCGTGTCTGTTTCTCCCTCTCAAACTCCTTGCTCTCCCTCTGCCGTTCTTTCTCCCTCTCCAATTCTCTTACTTTCTCAAGGTCTACTTGTTTTTGTTTTTCTATTTCCAGCTCCTCCCTCCATGTCCGTCTGTCCCATGCCGTTCCTCTCTCCCTTTCCTGTGTTTGATTCCGCTCCATCAGTTCTTCTTCTTGACCTTGGGAGCTTTTTCCAAAAGCTTCATCTAGAGAGGGGTTCCTTCGTACT…
CLocus_88597	1	680	46.19	98.05	136	53616	TGCAGAACCGGACCCATAAAAATAACAACGGTTTTGATGTTCAACAGTGTTGATGGGGCCCCCCTCTTAAAAAATCTGGAGTACAGTAGTGGAGAGAAATGTTGCACACTGGAGCGGGCTGGAGTGAACACAAAGACGGTTTGTTTCCCATGAAACAAACCGGCCATGTAAGCCAAGAGGCTGTGAGAGCGGGTCATATATCATGTATCAGCTTTACAGTGGTGTTGTGTCTTAAGAGTAGCATAGACAAAGGCCTTACGTCTCCACACTGGACTATGATTGAGGAGGACCAGGGCTGAGCACAGGGACTTGTTAACACTAGTGTTACGGAACACTGGAGGCTGAGTGAAAATGGTTCAGAGGTTTTATCCCAGCTCCCGGCCTCGGTAGGACTCAGTA…
CLocus_5567	1	681	46.19	98.05	108	3881	TGCAGTCCGAGTTCAGGGCTCCTTCTAATGAAGACTACTGCTTCAAGGAGCTAAACAACCAAATCAATCACAGGCACTTTAACACTTACTCTACAACGTTGATGTGCGATCACAAGGCGAGGGGTTACATGAGAAAGGGAGTGCAAA
CLocus_7715	1	682	46.19	98.05	24	5211	TGCAGTGGTTTTCCATTTTATTGCTATCAGTACCTTTTTCATTATTTATTGATGTTTTATTCTTGAATTGCTGTCTCAAATTTAGACAATTCCATTGCCACAGGATAATCAGTGTTTATCAGTAGTGGATCTTAAGGGCTGTGAGAAAAGATGGCCCAAATCGATGAGATTCCCATGCACTGACAGAATGGTGGTTAGAAACAACAACCTATACTATACCCCCACCTCCCACTCACATACGGTCACACATACCCCACTCATATACAGTACATGTACACACTACCTCTACCATACAGACAGGAGCTCCACACACTCATACATGCACACAGATATTCTCACTGCGCTTGTAGTAGTTGATATTTGCTTTTCAGATGTTCGCCATCAATATTGGCCTTTTGT…
CLocus_24567	1	683	46.19	98.05	97	16675	TGCAGCGTCGGATGGACATGGACTGTATGGTGCAGCTTGGCACATGTAGTTACTGAGATAGTATAGTGGGAGGGTCGTTATGTATTTATACTGGGTGGTGGTCTGGAGCTGGATGGATGGATAGTGTTGTATTGACTGAAGTAGGCTCGCTATACAGCAGGACTGGGGAAGGAAGCAGAGACAGGAGACATCTAGTGGCCTTTTGTGACCTGAACACAGACAGGGTTTATTGGTTCTGCTGTTAGTGAATGTCAAGCTCTTTGGTGTCAACAAGTCATTGTATTTTCCAGTCAGGCATACAGTAACAGCACCCACATTTTCCATTGACCTTTGTTCTCTTTTGGTTTTTGAGACCAATATTTTAAAAGCATACATCATGTAAACAGTTCTTGAAAATGT…
CLocus_92381	1	684	46.19	98.05	97	55271	TGCAGCGTCGGATGGACATGGACTGTATGGTGCAGCTTGGCACATGTAGTTACTGAGATAGTATAGTGGGAGGGTCGTTATGTATTTATACTGGGTGGTGGTCTGGAGCTGGATGGATGGATAGGTGTTTATGTGACTGAAGGCTCTATACAGCAGGACTGGGGAAGGAAGCAGAGACAGGAGACATCTAGTGGCCTTTTGTGACCTGAACACAGACAGGGTTTATTGGTTCTGCTGTTAGTGAATGTCAAGCTCTTTGGTGTCAACAAGTCATTGTATTTTCCAGTCAGGCATACAGTAACAGCACCCACATTTTCCATTGACCTTTGTTCTCTTT
CLocus_15120	1	685	46.19	98.05	77	10439	TGCAGCCAGGGAAAGAGAGAGGAAAGAGCTGCTAGTTACGGGTGAGGGAGGGAGGGAAGGGAAAGTAATACACTGAGTCCTCAATTTAGTTAGATAGCTACTAGCCCAACTTGCTTAATTGTTTGCAGTATGTTCAATGAAAACCCAAGGTTGAAACTCATTGAGGAGTGAATTAGTACTTCAGACACTCGTGTAAATTGGCAACTCAGGGTACGTACAGTATCGTACATGTTAACTCATACACACGCTTTGGACAGTGGAAAGTTAGAGGAGAGGACAGGATGTGGTGCGGAAAAGATCACCATATACACATTTTCACCTAAACCTACAACTGTGAATTTCAGTCCACTAGTATACTCTTATTTAATGAATAAATACAGTACACATTAAGAATGATAA…
CLocus_87092	1	686	46.19	98.33	7	52866	TGCAGCTGTGCATTGTCCTACACTCTGAGCATACGGAGGCTTACGTAACCTATGACAGCCAGTAGGAGCTCAGTCAGGAAACTCTGATGATATAAAGCTTCCTGGAAGGTTTATTAGATTCAATTCATGATGGATCTCCTGTAGGCTGAACAGTGTATATTTTTCATTATGCTCACATGCATATTAGAAACTCATTTTGAGCAATATGATTAACCTTCTAGCCTCTGTAGCTCAGTACTCCTCAGTAAGGGCAGATTTCTCCTTATTTTCAGTGTGACACTCATCCCATGTGCCCAACATTAACCCCACATCTGAACCACTGTTGACCTGTAACATGAGAGATCAGACAGATAAGCTGCTCATTACAGTCATGACACCAAACTCCTGGCAGAGCCCATT…
CLocus_51575	1	687	46.19	98.61	249	33774	TGCAGGATTATTTTATTGCTTCAGCAAACTGGCTCAAATTAAGATCCTACATCTGTACACACCTAATATGTAAGACTGCATTGTAAGACAGGCACACTCAAAAGTCCTTCTTCAAGGTCTCCTTCCCCTCAGGATCAAAGACTTTGAAGGCATTGAGGATGGTCTCCTCTGGGTCTGCACCTAAAGGATGACAGACAGACAGACCAAGGCATCGCTTCAATTTGACAGATGGGCCAAAGTCAGGATCTGCTGCCAGCATGAAGCCAGATAAACCAGCTATTTATCTCTGGCTATAAGCACCTTTTCAATCAGTCATATGAGCAGTGAAGCCTTTGTATGACATCTATGTTGGTATATCATCATTGTATTGGTTGACCATTCTCACATACTTCCATTCAA…
CLocus_5206	1	688	46.19	99.46	185	3663	TGCAGAGTCGCATGAAAATAAATCCCATGCAGCCAGCCTTGTTACCAAGTTTGAACCCTGGAATGTGAGCTGTAATCTACACCTCAATTAGGCTGATAAAAACCCTCATTGTTTGATTTTATGATTTTATAATTGGAGCGTAATTATTTCTATATAGCTTACACTTTCTTGTTCTGAACTTCTAACGGGAGTGGCTTCGTGACAATGATCGTAAGATCAGCTGCTCACCGATTTGACGGCTCCAACGCCGCAAAAACATCCATTATGTGGCTGTCTGCCATCGCTGGTTAACGCTTGATCTGATTGAATCTAGACCTTAGTCTTACTTTGCCAGTGAAGAACCTTGACTAGTGAACTTACCCATCCACCCTTGTCCCGAATCTCTGGACAGATGACCCT…
CLocus_23448	1	689	46.19	99.46	257	16022	TGCAGTATTTTGTTCCAACTAGGCACCACACCTGACCAACTGAGCTAATTGATCAGTTCAATGATTCCCTAAATTCAACACACCTGGTCTTCCAGGTCGGTTAAATCCAAAACATGAAGTGCCTGCTGCCCTCCAGGACCAGGGTTGCCTACCCCTGTTCTAGATCGTGCACAGGGGTGCACGCTTCACCCTTGTAGGCCTATTGTTGTAACGAATAGGCCTATTCTGTCACTATTATGTTATAAGAATTATGTACGAATGTGTTTTGCCGGTTATTAAAGGGTATAGGCTGGCCTATCTTAACTGTGGGTAGCCTAATTAGACCCCCCTAGATTGTCGGCCATTCATAGAATTGTTAATGTTGAGGCCGGTCAGAGCCTGGTAGACCTTCACCTGTTC…
CLocus_71486	1	690	46.19	99.46	273	44977	TGCAGCATAGTGCATACTGTAGCCAATAGCAGTGAATGTCAATGTTTAGTTTGTCTCCTTGTTGTACTAGTTGAGAAAACGTTTTGTGTGCTGTAGTTAAATTATCCCGACCAAATCCTAAAACCTTCCATATGATTCATTTACAAGACCAAATCTGAAGAACAAACAATCACAACTTATTGTATTGTTGAAATAAAAGCATGGTAAAGCACTCAATATACTCTACATGAGTCCTCTGTGAATATTACCAGCAGCACACAGTCTGGTTTCTCCTGATTGGCCAATGGTCTGGCTGAAGTGTTAACAGTAAAAGTGTGTTCTAACCTTCCCCTCCGTCCACACACTCTCTCCAGCGGCTAGTCAAGATGAACATGCCCATCGCCGATGACAACACAGTCC…
CLocus_39883	1	691	46.19	99.46	42	26616	TGCAGCGACCAAGCCCAGCCTCAGCTACTCACACAGGACTTCAGTGTAATACAGTATATTAGGAAAATTAGATGGAGCACGATTCCCTTTCTGATTCCTCTGGTCATTATGTGTCCATTTAGGGTGGCTTTAGCCTCTTCTCTCCCACCATGAGGGCCTCTCCAGCTCAGGGATAGCAGCTAATTAGCATGAGGAGGGCCGGCTAATGTGGAGACGGCTCTCTGTGATCACATTCACTCGGTGGCTGAGGACGCGTGGAGAGATGAAATTAGAGTGATTAATTAGGCTTTGACACTCTGCCAAAGGTTCTCAATTTAGCCCTGTCAAATCAATAAAAAAGGCATCTCCTTTGCCACACGCAAGGTTGACCTAAAGGAGAGTGACCCAGGGGTATTACCA…
CLocus_6336	1	692	46.19	99.74	43	4370	TGCAGCATAGTCTATGCTACAGTAATATAAAGACCGAATGCCCGTCTAATTTACCCATCTCCATCTGGCTTTCGGGGTCACCTTATTTTTTAATTGTAACTTTTATTTTATTGTGTCATTTGTGCTCCTTCTACCGGCCTCTAGGTCACCAGGCTGCTCGTTAGGGCGCACACCTGTCACCAGCGGTACGCGCATAATTATACTCACCTGGACTCCATCACCTCCTTGATTACCTGCCCTTTATATGTCACTCCCTTCGGGTTCTTCCCCAGTCGTCATTGTTGCTGTTTGTGTTTATTGTTTTGTTAATTTATTAATTAAATGTATTCACTCCCTGAACTTGCTTCCCAACTTTCAGCGTACATCGTTACATGTTGTAGCTGCAGAGTTTTAAAACAG…
CLocus_48756	1	693	46.19	99.74	266	32131	TGCAGGAGATGGTTTACAAATTGTATTGATGGTTTTCAAGTTATACTGTCAAATGGCGGGAAATGCTGGCCTGGGTCCTTGGTTAGGCTGTGTGGGAAGGGGGTGACATGTCTGGAAAATAAGAAGTGTGATATGGGGTACGTTGCTACCAACCATTGATATTAGTCAAGCATTTTGAATTGTCTGTTGATTAGCCAGTTCAACAATGACAGTATTTCTAAACAACTTATGTATAACCAACACAGTCCTGATCGACTGCCACCCATCAACACTCACAATACTGAAAGGGACTGAACAAGACACTTAAAGTGTGGACTAAAATTTCCAACACCTAATCACAACTAATTAGGTTAATAGCTGGGTAACATGTAATTGGATGCATAAACACACATTTGTCAC…
CLocus_24304	1	694	46.19	99.74	44	16508	TGCAGCCCAATAGGGCGACCAGAGTATGGGTGAGTGGGTGTGTCGAAAGGAGTGGGTGTATGAAATAGAATCAGCTAATTGGGTAGATTTGTTGCCACTCAAGAACATTTTGCGTGGCTGATTGGGCTGCATGACGAATTGATAAGCCGCCAACCATTGCACCGGTGTTGTATCGGCCAGCCTGCCGACTTGAAATGATTCTTACTGTGTATCACGGTCGTGTCGTCGGAGGTAGCTAACTTGGCAATTTTTTCTCTCACCCAATTTCATTTAAAGTAGGATAGCAGCCTACAAATAAATAACTAATATTGATAACCATCTAGATGTCACCTTGATATAAAGCATACATACAATCTACTACTCAATGGGGAGGGCATGAATGGTAACACCGGGACACAG…
CLocus_117291	1	695	46.19	100.02	49	64975	TGCAGAACATTCTCTGTCATCCAGAGAAAGGATAATGTACTAGGTAAAGGGTGTTCAAGCATCACATCATAGTAGCTTAGCCTCAAAAATCAAAGGCTGTCACTCTATTAGCCCCTCACTCACAGAGACACAGTCCCGCAAGACACTGAGAGACACACACTCTCCCGGTATCAATGAAAGCCTGAAGTACATTACACTCCACACTGACTGACACTCTGTAAGATTTGCCAGACAAGTGACGGACATCCTCTAAGCGTTCCCCTTCTCCAGTGTGGTCGCTCTGTTCACTGCGGCCGGAACACAAGAATCTCTCATCATGGCTGTGTGAGAGCTAGCTAGCTGCTTTCCCATTTGTCTCCTGCTGCTTAACTGTGCCACTTCAACAAGCAGTGTCTAACC…
CLocus_98171	1	696	46.19	100.3	97	57617	TGCAGCAATGTTCCAACATCTAGTGGAAAGCCTTCCAAGAAGATTAGAGGCTGTTATAGCAGCCAAATGGGGGATCAACTCCATATTAATGGCAATGATTTTTGTATGAGATGTTCAACGAGCAGGTGTCCACCAAATTTCGGTCATGTAGTGTATATATACAGTACCAGTCAAAAGTGGTATGGCGCATAGGGGAGAGTGGGGTAAGTTGAGCCATGTTTTACATTCAGCATTACTCCGTCAAGGGAAGTATAGTATTCTTTCTGGCGAAGATATCATCTACATATAGTTCAGGATGTTGTGTATCCCTGGAAATAATCAGAATGAATGTAAACATTACAGTTTTGAAAACATAACTTGTCCAAAAAAAGTGGTCTCTTGGATAAGCTGAGCAGCGGG…
CLocus_109989	1	697	46.19	100.3	26	62393	TGCAGCTTTTCTATGGAGAGATACAATGAAATTCAAAGAGAGAAGCCATAAACACCAAACAGAGTTCTCTCAAGGTCCCACCTGACAGGCTGCTGTAATACAGAAGACATAACAGTACAAGACCAGCACAAGCCAAGGGCCAAAACAGCTTCATTTTCTAGTCACCTTTACCTCTTAGTCACTGATCATGGATGTCTGGACAGGTGGAAACAACTTGGTGGAAACCTATCCAGTCCTTGTACTTATCAGCTGTTCTGATGGGCTGAACTAAGGGCAGTATAATTGAACCATTGATTATCACTACCCTTGTCTTCTAATCAGTGAGTGTCTCAGGAAATCTTAGAGTTACACAGAGTCAACTGAGGGAGAGAACACACAGTCTTGGAGATGGGAAACAAT…
CLocus_86809	1	698	46.19	100.3	92	52765	TGCAGGTTTTTGGGATATCCATGTGGAATAAATCCAGTGGGACATGGAAACGGCTCTATTTTAGGAAACTGCAAGATATAAAAACGTTTGAGAAAACGGGTTTTAAGTATTGCCCAATAGCTTTCATGTTCTCATCTTTTCAGAGTAAAATATACAGGAAGAAAGATGGGGGCATTGAGACACAGTGACGCAATGTCCTCTAGAGACAGGTGGACTGAGGCTTCCCCCAGACAAAGTCGTTTTAGGACAAACAGATTATGGGGTTTACACTAATCTGTACATAATGCATTTAATTCCCTTCTTTATTTCCAATATAATCCTCACAATCCCATTTAAATTCATTGGCTCAGGGATTATTCAGTATTTGGAAATGTAATTGACTAGCCTAAATACATTACT…
CLocus_60000	1	699	46.19	100.3	315	38826	TGCAGTGTTACCTGTATCAGAGCTTGTCTGTTTCGGTAGGCAAGCTCAACAGTCAAGTCGCCCTGCGTATCTATCAATGCATTCTGCCTAACAAAAGCAACAGCCCCCTAGACATGGGCACCACTATATGACTGTTTGCCAACAATGACGTATCTGTGGTATTCACAGACGTGTTTGGTTTTGGGCTGGGTGGGGACAATTCCTTTTCATTTCAATCACACTGTTTTCTTTAGTTTCCATCGCTGTTCTTCCTCTTTTCTGCCACAGAAGCAGGCGTTGGAGCAGCTCCATGCCCAGTAGAGACAGCTAGATGAAACAGTGGTATCGTTGGTATAGAATGGGTTGGACATGATATGGACCTTTAGACACACTACAGTAGTACAATAGCATTGGATACTG…
CLocus_118346	1	700	46.19	100.3	103	65274	TGCAGATGTAATCTCTCACTCTCTCTCTCTTTTCCTATCTCTCTTTCTCCTCTTTTTCTCTCTCTCGCAGCCCACGCTCTCTCTCCCTCTCTCTCTCTTTCTCCCTCTCTGCTCCCCCCTCTCTATCTGTCTGTGATCACTGTGGTTACCTCTCCTCTGTTGTTGTTTCTGCCTGGGATTAAGAGGTCACTGTATTTCTGCGGAGGAAAAGGAGACTAGTGTAATAAAAAGGCTTTGGGTAGTGTCAATGCAGTTGCTGTATGGGTTCATCTCTATAAGCTGTAGTTTATTTTGATGCTGATGTACAGGTTTTATAGACTATATCATACTAGTTTTCCTAGAACATATTCCTCTTGTACTCGATAGCATGTGCTATAGACATCGGACCAGTTTTGAAGC…
CLocus_81425	1	701	46.19	100.3	65	49989	TGCAGTGTATGATATGTAACCATGGTGACGCTGTAATATATATATCCCTCCCTTCATTCATCAGCGTTACCAAGAAGGACAAAGCCACCGTCTGTGTGACTCCAGATGCACGATGGATCAACAAAGTCATTGCCAACGTTACAAA
CLocus_52804	1	702	46.19	100.3	51	34581	TGCAGTGGAATGTGGTGGAATGGTATCAAATACATCAAACACATGGTTCCGTCTGTTTGATGTCATTCCATTTGCTCCATTCCAGCCATTATTATGAGTGGTCCTCCCCTCAGCAGCCTCCACTGACACAAACACACACACAATTTTAATGAATTACTCTACAGAATCCAGTGGTGGTCACTGACTGGCTGAATACCCGTGGCACGAGGTGGTTGGAGTTGTCAACAAAGCAGCATGACAGAAATATGATGCCAAGTTTTCAAACTGCCGGCAGTTTCTTTGAGAAGATATATAAAGCGATCTGTGCATTTGAACAACACCATAAATACACCTATTTCATTTTTGAACAGATTCGTCATGAAAGAACTAGTGCACTTGAGAGACGCAACAAGTATGCAG…
CLocus_29319	1	703	46.19	100.3	28	19925	TGCAGATGGCTCAGAGTATTTTCCACAACTGTAAACACTCCCAAAGTGATGGAGAGAGAATGGCATTTGCAAAGATGTGCAAAAGTTGTCACATGGGCATTTTATTGAAAACCTTCAAGCCTATATTCTCTCTGGTGACCTCACATTCAAATCCTAATGTATTATTATTTTTCCCATGAAGATTTCCTTACAGAGGATGAAACTGGCCTATTTACTTTGTTTAGCTGTTTTCTATGTGCACACATGCATTTTCTCAAGACAAATCACAGCGGTTTAACTGATTTTCCTCCATACCGTACATGTTGTGCACTCATGATTGAAACAGTATTCTACAGGGTGAGCATGAAAGGGCCTACTAACATCAGACTAAAAACGATGTTGCATAACCCGGATACATGT…
CLocus_12836	1	704	46.19	100.3	76	8767	TGCAGGAGTCTCACAAAAACAAAATGGTGTTTACTTTTGGCTTTCCAGAACAGCAACCCAATCCAATGTCAAATAATGCTGCTGGTGTTGGATTTGAATTGTTGTTAACAGCCAACATATTGGGAGAAGAAACACTGCCACAATATAGCATATAACATAGTGCTCGCTGTTACTTGGTCTTGTGTACTTGTTCACATGCAAGACCTTGCTGCAAAGTACCAATTAATCCAAGGTGGTTGAGGTAACAAAACCCATACAGTAGAACCACCTCTTTAACATAATCTGTATCTCTGACAGGAAGCTCCTGCATGGCTTTGGTGGACACTGAAGAAAAGTGAATAATATTTTCTTGTGTGTGAGAATTGTGGTGCCTGTTGTATGTACAGTTAAAGTCGGAAG…
CLocus_8262	1	705	46.19	100.3	98	5571	TGCAGGCGAGAGGGGAGGTGAGGGGAGTGAAAGGTGTGGGTGTATCCTAGCACGGGGTCGCTCTGACCCAATGGACCCCTCATAGAGCCCACTCAGGTCTAGCCCTCCCCCTTTTCAGGCCCTTTCGGGTGGCCCCTCAAAGCACCCGTTGAAAGAATTCAGTCATATAAAAAGGAGTCTTACAGAATCACCCCCCCAAAAAACTAAAAACAATCCAGCTGATTTCAAATCTCTTCCGCGCTAGGATACACTTGTGCATCCTCCACCGGAGGAGGCTATCGAGGAGAGTAGCAAACTCCTCCGTTCTCCTACTAACTTATGGCGACCACTGGAGGACAGAGGAGTCGAGGAGTGGACAGATGTATCCAATTGAGAATCTCATATGGTCCAAGGAAAGGC…
CLocus_32516	1	706	46.19	100.3	38	22064	TGCAGGGCCAAGACTGCAGGTTCTGACAGCCTCTCATACAGCTGTATCCAACACAGCACAGCAAAGTTGGCCTACAGTGGACCAGACCATTACCATACCAGAAGATATCTATCCCCGGGTGTAAAGTTGACCTGCCATGTGGGAGAAAGATGTATAGAAGCCAATGTCCCTCAAATGTCCTTTGAGGTGACACTCACTCTCAGGAAGTGAAAATTGATAACTGTGTTTTTGTGTCACATGATTTCGGTCACTGACCAACATGTGACATTGCTATTTTATCAGACATAACTCAAATGCATTTTCACCACATGAAAGGAATTACTAAGGGTGTTCTGTCAAAACAGGAAAAATATCGTTCATGCGTACATTCTTCCTTATATGTGTTTCCTGAATGTATGT…
CLocus_56890	1	707	46.19	100.3	105	36984	TGCAGAAATTATAGTATGGTAACCATAATATGTTAACCATATGTGTAACCATAGTATGTCCAACGTAAATAATCGAAACCCTAGCCCTAGATTACTCCATATTTCGCCACACGATGAGCATTAAGATAAATATGGCCTCTAACCATTTTCCCAGGAGAGGCATGCAAAAGGTAGAAGGAAGATGTGGGGGATATGGGATCAGACTTTGTAACAGTATTTATTCCACCTTTCTCCTCGCTCCAACCTTGGCTTGAATCAGGGATTCTCTGCACAGATTGATAACCGTCACCCTCGAAGCATTGTTACCCATCGCTCCACAAAAGCCACGGCCCTTGCAGTGCAAGGGAAACAACTACTTCAAGGGCTTAGAGCGAGTGATGTCACCGATTTAAACGCTAT…
CLocus_64064	1	708	46.19	100.3	293	41089	TGCAGTGTTAATCTCTCTCTCCTCTCCTGTTCTCTCCGTCCCTGAGCCTGTTATTCACGCATCCCCCCGGAGGCCCGGCTAACAGATTGCCAATAAGCTGGGTGGCAGGCAGCTTTCACACGTGTCCCCCCAGCCCCAGTAATGGCCCTTACCTGTCACTGATGCCTCTACCCCTCGCACATGTTTCCTCCTCTCCTCTCCTCCCCTCCCTGTCACCCTGTCCACCTTCCACTCCACTCCCCTTCCCTCTCTCTCCAGGGCATTCCATATCATGTACCCCCCCCTCCTCTGCTCCCGCTTGCTCTTATTTCACCTCTTCTCCACTTCACCCATTGTCATTATCTACACCTTCCTCTCCTCTCGGGTCCTCTTCTCCCTCTCCCCAAAACCCTTCTTCTC…
CLocus_17148	1	709	46.19	100.3	128	11791	TGCAGTTTTGAAACCAAACCTATATGGAAATGGAACGTTACTAAAGATCGTTGAATGATGCACGCAACAAGTAATGTGGTATAGATGAATGATTTTATTATATCATATTTATTTTATTACATTATTTTTAAAAAATCCTAAATGTCTAACAACCTTACACCCACTAGTTTGATATTGTCATACATACTTGTATGACCCGTCTGCTCAGTCCTGTCATGTCTGACAGCTTCTGTAGAGTCTGGGCATCAGGGTTGTTGTCTTGGTTAAACTGAGACTGCATCACCTGGGAACACACACCTAGCAAACTCAGTCATGAAGCTACATATTCAGCTGAATATTCACTGAATCAAGCGAATTCAGTCAGTCAGACACATTTATCTAAATGATGTAGAACGCATT…
CLocus_76450	1	710	46.19	100.3	8	47620	TGCAGCTCGCTCTTGCTCTCTAACGGTGAAAAAAGGGAATTGCAGCTCATGAATAAACTGACCCAGCAGGCCAGGGTCATAGATATGAGTTGAGAAATCTGTCTGTTGCAAACAATTAGACCAAATGGGATTTAATTGTGTAATTCTGCACAATGATCTGAATTTACAGCTATACTGCTCAATTAAAGACATCTCAGGCAATAAGTCTGGAAATCAAATGCATGATTTCTGTAGTATTGTGCACCTGTTATTACCGGCTGAAGAGCCAAATGTTTGTTGAGTCTATTATGAGTGTAAACACAGGCAGTTATTACCATATCAAGTGAATCCATAATTCACCCTGTGTCTGCCAGAGCTTTGTGACATGTGTGTACTTAAGGCACACCTGGCTAACTAGTG…
CLocus_55702	1	711	46.19	100.3	312	36320	TGCAGTTTCTCATTGAAGGGGAAAGGTGGTCTCCGTCAACTAGCAGCAAGCACCAGCTACACTAATATCCTCATCAGAACTAGCCTTTCTAATTACTCTATTGCCTCTGAAATCCTATTGACTAAATGTATTGAAATGTATATGTTCAATGTAACATCCTATTGGATTGTCTTTTTAGTTTCATTGTGTGTTTGGTGTATATTCTGCTCTTTTGATGTGCTTGTCACCGAGGCTTTCAATCCACTGTAACATGCAGTCCAGCAGCAATATCCAATATATCCTGAGAGGATGTATGGCTAAATCTCTGTGCGCAGCATGAAAATGTTTACTGATTCGTAGAACAGTTTCATTAAATGCCACTAATCATATTTTCTATTCAAAGTTCAGGAAGATTCGTTT…
CLocus_74572	1	712	46.19	100.3	226	46619	TGCAGTCTGATAAACATGTTAGCTGTGTGCGGTAGGGAAGGTCTGTCAAATTCTGGGTTCTGGATTGACTCTGTGTTTATGAGTCATCATAAGCTGGGTATTACAAGGCCTTGTATTGTATAGATTAGGACTGTCATACTGCATATGCAGGGATCTACCAGGGCTGTCATACAGTATGCTGCCGTCAGTCTGTTGTTGGCCGGGTGTGTTATGTCATATGTTTGGTGTCAGCTCTGTGTTGTGTTCCATGGCTGCATGGCCTTAGTGGCGGAAGTCCATTGCCCTGGAAACCCTCCTGCTCTGCCACTTTGAAACTCAATCTCTCAGGGTGCCGTGTTGTGTCTTTGAGTGGTATATCCCCCTTGCACTCACGCTGTCATCGAGTGGCTCTCTCTCTCC…
CLocus_49854	1	713	46.19	100.3	130	32777	TGCAGACATCCATCCCTCTGTGGAATGAGTTTGACACGTGCCTTATAGGATAACTGTTGACTTATAAGATAGTTACAAACAGAAACGTACACAGCAGGTCCATTACTTCATGATGTTGTTTTTATTATCCTTCTTTTATATGAGCTCTTTTGCAGCAGTTTAACTGTTGAAATCCAACAGAAACGTTTACGTTTTGAATAAATCACATTATATACAATTACATCATGTTACAGTGTTACTATCCAATCACATTTTACAGAATCACAGAATACCTCTTGTATATACCAGTGTAGCCTACCCAGCATCCCATACTGTTGAGTACACTGTACTTTGTACTGCGTGAGTAGAGATGCGTCCAGTGAAGGCTCCTACCATACTGTTCAGTGCTGAAATACAGGT…
CLocus_101119	1	714	46.19	100.3	124	58779	TGCAGGGGAGGAAGGAAACCATTTCCTGGTCTCTGTTATTTCAATCAATTACAAATCTACAGTATTGCAAAACCATAATTTACAATTCAATACTGACTGCAACTCACAAGCGTCAAATCTGTTTAGTGACACACCACTGCACCCTAGTGGAAGTCCAAGTGCTTGCATGTGGCTTTTATTGCCTTGCACTCCACTGGTCAGCATTATTCCTGGTGGAGGAACAGATGGGTAGATTGGCAGACTCCCATTGGAGGAAAACAATGGTCAATAGAGGAAAGCCTTCAGCAGCTCTTAAAGCCTACTCCTCCTTACCACATTCCCCTGACTGGCACCACACAGATTACAGACAGGCTGAAAGAAGCTCACTGGAAGAAACACAATCTATGCTAAATCTGTATG…
CLocus_80953	1	715	46.19	100.3	250	49722	TGCAGGGGTCTATGGGGGAAGAGAGCGGGGAGAGAGGTTAGCTTATAACTTAGCAGACTGGCTACAACTCAATAGTCTTGACTAGCTTCCTTTCCTTATGTTTTACTGACATGAAAGAACATGACGGGATTTATAGAGACGTGGTGGCCTTTCACCTCTCAGTCATGAAATAAAAGAGACAGGGGGCCACTTTAGAGTATTGAGACATGGCCACTGTCTCATATTAACCTGTTTTTATGATGAAGTCATAAAGATGATAGGAGACTTACTGGGCTTACAGTCGTCAATGTTGGTCTCACAGTTGCGGCCAGCATAGCCGGCCTTGCAGCTACAGTGGTAGTTGCCTTTGGTGTTCTCACAGGTGGCCCCATTGAGACAGGGGTTCTTCACACACTCGTT…
CLocus_99608	1	716	46.19	100.3	215	58178	TGCAGACAGACAAGAGCCGTGAGAAAACAAGTTGATCAGTCATGGAAATAAAAATGCTGAAAACAAATTTGCTCCCTATTTCAAAAGAAGATGGAGAACAAGCTACAAAGGACAAATACTGGAGTTTTGGTGCAGGTACAGCCAACTAGCACAACAATTATATTGCGATATTGTCAAAACGATTCGATGAAATTTATCGTCAAAAATAATATCCCGAGATGTAACTGCATCGATTTTTCGCTCATCACTAATTTAATGGCCAAAAGTTTTGAGAATGACACAATATTAATTTCTACAAAGTTTGCTGCTTCAGTGTCATTAGATATTTTTGTCAGATAAGGCTTTTATTGACAATTACATGAAGTTGATGCAAAGAGTCAATATTTGCAGTGTTGACCC…
CLocus_59379	1	717	46.19	100.3	108	38458	TGCAGAGCGGAGATCAGAGGAGGAGGGGGTGGAGGGAGCAGACAGCTGCTCCAGCCCCAGTCAGCACTCCACCAAGCCACACACCAGCTGGGGTTGGGGCCCACAGTCAGGCAGCTACTGGAAGGCTCACGGCAGCAGAC
CLocus_26033	1	718	46.19	100.3	153	17642	TGCAGTTATACTGTCAAAGTAGGGTGTCCAATCCTAAACATATTTTGAGCAATGGGTAAAACAATATATTGTGTAGACAATTCTCTAAGAAAACCAATGGTCCAAACTTAAAGTTATTGGAGTGTTTACCCTTGTAGGATGGCAGAATTAAGGTGACTTAATAATCAATTGAGGCTAGAGAAGAAAAAAAATGGAAAATTGCATGGCGTCAGCTAGGCTGCAAGAATTAAGGCTACTGGCTACCTGACAGACTCCCTTTCCCATTGAACTCCTCATCTTTCTCCTCAAATCCGCTGGACATAAAACAATATATAGGTAAGATGGATATCGACTTTGAGTCATGATGTAGTATTTTTCATATTTTAGAATACGCTTTTCATATTAATTCAAAATACTGTT…
CLocus_53580	1	719	46.19	100.87	250	35105	TGCAGAGAAAAAGCATTAACTCTCCTCTCTGCTCAGCTCCAACCTATGTGCTGCCTCCGAGTAGTAAACACAGAGGCATACTGTAATACACTTGATAAATATCAACCGAAATAAAGCAATCAGCTGCAAGCAATTTGCATGTCTGTGTTGGAGCCAGCGGCGGGTGATTTTCTCTGCTGTCATCCATCATGGGCTCCCAGCTCGGGCCAAGATACACAATGCCCTTCAATTGCTGTCATATGGAGCCCAAGTGCAGAAAAACCCACAATTTCTACTGGTCTGTACTTCAAATAAACTTGTGTTTTAATGTATTTTTGTCCACTTACAGTACAACAATGCTTCAGAGAGAGAGTTGGTGTAATGTTAGGACCCTAATCTCCCTCATGCAGGACCCTAATT…
CLocus_126625	1	720	46.19	101.15	41	67747	TGCAGATCTTTAAGGTTTGGGATAGGGTAAAAAAAAAATATTTTTTAAACGTGTGCCTATTACTGGGATTGAACAAGCAACCCTCAAAGCCGAAGCTCACGGTTTATGGCCATCCGCCATCCCCCTCCAGAGAAAACCATAGAAAGCCTACTTGATGGTAATAGCTCTCACCGTTGCCCCTAGTGGCCGGTCTTAAAGGCATCTCCCGACGTCCCTTGTGCCTGGACAGACGTCAGATTTCTAAGTGGCACATGAAAACACAACCCACACACACAAATAAAATAAACGCCACACACATACACACATAAGCAAAGATACCCAATCATGCCCGCAAACAGACACACACGTACACACACGCACATGTTGGTTTTACTATGGGGACCAAAAAATGTACCCCTA…
CLocus_2800	1	721	46.19	101.15	16	2151	TGCAGGGCAGGGACAAATTTTTTCAGTGGTGAATCCATTTCTGTGTGACATTTAAAGGAGCTGCGTACATGCCAACCGGACCTCCAGGTAGAACAAAAGCCTGGAGTGTGGGAAGAGGAAGACTGAAGCAAACTTTGTGTCCCTGGGTCCTGAGAATGGAGAGAAGAGTTAGAGGAGTAGATCATGGAGAGAATGGCAAAGGAGTGAAAGGATGGGGGAGAAGATGATGAAGAGAAGGTTAAAGTGGTTGAGGAAGTAGTGATGTCCCACTCCAGTCTCCCTTTCACCTAATTTATCACCTGATTTACTTAACAAAAGGCACATCGCAATAGGTGGTCCAGGTATCCTCATGACATGACACAAGTGGGAGGGGGTGGGCCTTTCCTCTGTTATTCTTTA…
CLocus_34743	1	722	46.19	101.15	230	23432	TGCAGAAAGCCATGAATTTGCATCCCTTTCTCTGTTTTAGCTAGCCACTGACTACACTTTAGCTAGCTAGTTAGCAGAGCAGTAGATCAAAAAATGGTTGTTTTACTTAGCCTAGATAATTGTTTGCACAGTATGTGACGTTGGTGTCTTTCAGACCTTATGGCATTTTTCATGTATGAGCATAAGAACATTAAAAGGGGAGAAGACCACTAAAAGTCTGGCCATGTGGCGAGGGGCAATTTACCGGTTTGGTCAGGGCCAACATGAGGGATATAGTTTGTGTGTCAGTGAGTCTAGCTATTAAGTTAAGTTTGAGCATCATAGCAATAATGTTTTCTATACAGTGGTCAACATTCTACAAGGAAGGAGCCACTTAATCAATTATATAATCATTAACCA…
CLocus_59924	1	723	46.19	101.15	56	38786	TGCAGTGTAGTCAATGTTAACACTGGAAGCAAGGCTGCGTTGTGTAAAGAGAGGTGCTGAAAAAACAACACATCCAGGTAAAACAAGAGAAAATAGCTCTGGGGCAAATCCATGTCAAGGCAAAATTAGAAGTGTTTGTTTGGCTGAAAGTGATACATTAGAGGTGCAATGTGTCCACACTCAGTCCACACATCTTTCTGCATGAAGTACCGCTCCTGTTAATGCCCCAGCTACCCTCTCTAGTAGCTCACTAGGACTTAAAACAGAGCAGAACTCAAATGAATAACAGACATGATATTGCATTTAGGTCACACAGTTTTTAGCTCAAATGGCTAAAGACTAAAGTTTTTACAAGATTAGACAAATAAGTTGTTTCTCCCATGAAAAAAGCACGTATAG…
CLocus_73311	1	724	46.19	101.15	64	45989	TGCAGGTACGTCAGTCATATCTCCAAATCTGTATTGTCTGTAGTTTTATTATTTGTTTAGAGTCAAAGCAGCCAGTACAGAGAGGGATGGTGGTTTAGGTGACAGCCAAAAATTATCGAGAAACGACTGGTAAACCACTCGTATTCGTATCGGACTGGTAAACCACTGTAGAAGACGCCACACCCTGGCCATGGTAAACAGGTGTGAGTTGGGCATGTTCCTACCAACATCTCATATTTACCCAATGTTCCACACAGTAGGTGACACATTTGTTAACACAGACCTCACAATCTCCTCTGCAAAATGACGTGTAGAACTGAATTCCAAATTCTTGCCTTAAGTTTTGTGAGCTGAGAAACTCCTACACAGCTTATGTGTCCTTATTCTTACCTGCCTCTG…
CLocus_27642	1	725	46.19	102	106	18748	TGCAGTAGTTGTGTGAGTGTTATGTTGTTTTCAGATCAGTGCAGTTAACACATATTGGAGTGGGGAGACATCCTATGAGGACTCATTCACTTTTCTCAAGGACTTGGATAGGGCAAGGCTTTTGCTGACAAAAATGTGTGACGTATTTATGTTATTCCTGTCTCCCAGGACCTTGCTTCATATCAACTTCCTGGCCCCTCTTATTATGGTATTGTTGTGGGTCAAGCCCATAACCAAGGACTACATCCTGAACCCTACCCTGGGGAAGGAGAGTTTGCCTTTGTAAGTTCACCTCTGGGTTGCTTCGTTTGTCATTTCATGTTTTCCCAGTGCTTTTCAACCACATGTATGGTGTTGACACGGCACATCCAAGGTCAAAGGGCCAGGCCTTTCCAATGT…
CLocus_80431	1	726	46.19	102	145	49430	TGCAGTAGTCAATACGTTGAATAGATACTTGAGCACTGGTGGTGGATGCAGCAGGAAGGAAATATACCCAGGACGTTTCAATAAAACCCTCTTTTAGATTGTTAGCTAGGTGTCAATGAACAATAGAACAATTTGAGTGAATATGAAAAGTCCTTACTGGTTAGTGGGCGGCGCTGAGAGCGGGAAGACCACCTCCTCTTCCTCGTATTCTGGTCCATCCTGCATGTCGCTTTCATCCACAGTGCCGAGTCCCCCGTAGCCTGCGGGCAGCAGAGGTGGTGGTGGTAGTGGGGGGAAGACACTGGGCCCGTCTGGACTCGCAGAGGTGGGTGATATCCGGCTGCCGGGCCCCTCTGAGGTGGGGGAGTAGCACACACCGCCAATGGTCCCTGAGCTTGT…
CLocus_10472	1	727	46.19	102	142	7043	TGCAGCACAGTTAATCATAAATTCAGTGATTTTATTTATTATTCATATTGTTTTACAAAGTGAACCCAATTTGAACTTGCACAGCTATTAGGCTGATTTTATTTTTGCATCACAAAAGTGTTACATTTTTGTTTTTGATTGGAAAAAAGTGTATTTGAATCACATTCTGGCTAATGTCACGCTGTGCAACAAGCCTACATAAAGACTGTGTTACTGTGTGTATGTCCCTCCCCCCTCGAGTTCTCTCAGGTGGTATGCTTCATAGAACACAGCCTTAGTGTTGACAATGTCTCCCAGAGAGAGAAAAAAAGTGTAATATTGAGAGCTGAATACAGAGGACAAAATGGTGTACATGTAGGCCTAGGTATCCAAGGTTGTCGATGTCCGTCCCTCCCTCCC…
CLocus_68654	1	728	46.19	102	170	43482	TGCAGCTGGCTATGGTCCAAAAAGAAGAGGACAACACTGCTCACTATGAAGAAAGAGCACACAGCCATGTCCACTATAGACCGCTAGAAGGAGAAAAAATGACTGTCAGTGAAAACAATCGCATTCCAACAATTCAATATCTAATCATTAAATCATTAAAACATTTGAGGAAAAAAAATGTATGCACTTAAAACCTGACATACACATATAACCTAACCCAGGGTTTCTTATTAAACTATGGGTCGGGAGCCAAAGTGGGCCCTGGGCATGGTGGGTTGCGAGTTACGAGAATACATCTATAATACACACAATTTCTTCTTAAATTGGGTCGTTGGAGGACGATTTGGGTCATGGTATGGTCAATTTCTCATTTTGGACTCGAGCTGAAAAAGTTGAAGA…
CLocus_11054	1	729	46.19	102	123	7465	TGCAGCCCTGCCCCTACTATGAAAGTTTTATATTGACTTAATAAGTCTGGCTTAGGGGTTCGGATGACCATGCGCTAAATGGGCCCTCAGCAGTGTACTCTGGCAGGCAAAGCAACCAGAATAGACCATTCCGGGGGCAATCGATTTACCATTTGTTAGATGTTAAACAGACAAACATGAACTGTGCCGTCGAGTGAACCGTTCACTGTGTATGCATGGATGAGAATCATAGCATGTCAGTGCCAGCACGGTCACAGGGAGGCAACCAGCTCCCTCTTGAGTATGCTTGAGGATGTTCAGTGTTTGTCTTGAAGGTGAGCTAATTCACCCCTCTTATCTCTGGCACTTTCTGCCAGCTGCTGTTTCCAGATAGATTACTGTCAGATTGAGTCCACTGTA…
CLocus_126315	1	730	46.19	102	117	67627	TGCAGTCACACCCATGCACATATGTACGCCACGCTAGTCGTTCACAATAAAAAGGACTGCTGTGTCTAGACCCTTTGGTCAGTTGGATTAAGATCAAAGGAAATGTGCTTTTTTGGGATGTTTTTGCTGTAGGAGCTTTTGCAAAGTGTGGTGTTTTTGTGTGAGATTGAGTGCCCTAAAACCTATTACAAACACTAGTAGGTAAAAACAATAGTGCTGTTTTTAGCTTTTTCATCCACATTTAATAGTTTTTCACTCAGCCATACCCAACTAGGCTGACGAAATCCTACTACAGTCACATTCCTAGATGTAAGCAAGCCATGCTGAAAATGTTTGCAGTAATTGATTGAATGTGGTTAATAATTCTCGTCCATCTCAGGGAGTTGCCCAGCCTGACGG…
CLocus_11436	1	731	46.19	102	196	7766	TGCAGGTACCAGAAAGTATTTCATAAAATAGCATTAATATTATAGTGGCTCATAGTATTGCATAACTATTGCACATAGTTACACATAGAAAACGAATGACCATTTATTTCGTGGGAACTAAATGTGCCTTTTTAGGGAAAGCCATAGCCTACCTATCACATACGGTATATCTAATGGTCCGACTTTAAAGTTATGATAATATGATGTGAATTGAGTGTTAAATTCCAATAATATATGATTTGCTGGTAGATCCATAATGGTGTAGGCCTATTTATTTAATTGCCTACATTCATTTATTGTAGTCTATTCATCAATTGTTATTGGAGCGCTTGAATTGATGATGATTTCTAATTGACAAATGGCAAGATGTCCAAATGATCCATGGAGAAACAGAAATTG…
CLocus_86522	1	732	46.19	102	24	52608	TGCAGAGCCCTCCTGTCTTAAAATAAATAATGAGCAAAAGCTGATTGGCACCCTATGCCCCGATTAAGCAGAAATTAAGCAGTACATTAACCAATAATGTACGCAGGTATGGGAATTAATTGTTGACACAACTTAAGAATCATTAGGTGGTGGTTATGTTGCAAATCTAGTAATCACTTATTTTTATTTGTATTTCCTAAAACTCAGGAAGTAGATGAGAACATTAAAATTGTTGATAAGGTCATAAGCAAGTTACTGAAGAGGGATTAATAATAACGAGAATGTTGGCTTTTTATACATAATGTTACTATTACAGTAATTAGCTAATCAAATAGCACTCTATAATATACTTGTGGTAAATCTCAGATAAGATTATACTCCTGGATTATGATTCATTTT…
CLocus_72247	1	733	46.19	102	108	45414	TGCAGTTCAACCTCTTCACTGCTCCCTCTCTGTCTGATGCTAAACAGCTAGCTGCCTGTGTTGGAGCATCTTGAGAGCTGACTGGTTCAAAGTCAATACATAATAGTTCTTGTTTCGTGTCCTCCTTACCATAAACCGTTACAACTTCATTGCCAGTCCTGAAGTAATCCATCTTTGCTCTCTCTGGACCATTGTAGAACAGTAGAATGGATGGACTAGTGGCTGTCACTTTTGATAACTCTTTTTGGTGTTTTTGTCTTTTTCATAATTGAGAATGAATGAGTATAATGTCATGATAGCATCTTGTAATGTCTAATTGGGTGTACTGATAGAGTCTAGAGATGTCCAGTCACCCACCTTTTTTTTCATCTTCAATGGTCAGAGCAGACACTGATGTCT…
CLocus_14616	1	734	46.19	102	81	10141	TGCAGTGAATATGGTCAATGGGCCTAATTTACATTGCCAGTTTTATAGAGTGTGATAGCATGCCTTATTTTAAAGTAGTCGACTGTGTTTTGGAGGGATTAATGAATGTCATCCAGGTCAGTGGGTTAATGGGTTAGCTACTGATTTCTTGAACAATTATGGCAGGTGGCATTAAATCCCCAATGCAGTTACAATGGATTACTTTAGAATAAGGACGTACCTCCGTGACACTGCCCATGCTGTCACAAACAATGAATGGAAAAGATAGTCTGTGCTCCTTCTCTTTGGATTCTATGGACTCCACTCTGCTATTGCCACTCATGAGGAGAAATATTGACAATAGCAACACCTGAATGAATACAGGTACATAATGTGGCATGATATTGCTAACTTTCCTTT…
CLocus_59153	1	735	46.19	102	103	38321	TGCAGAAGAGGAACAGAATTTGTTAGCACAGAACATCAGCACACTGGGTAAGTCTCTGAGAGATATTCATTTTGATGTGGCAGAGCTTCAACCTTTAAAAATAATTTTCCATTGATCAAAGTCAGCAATTTCAAATTTCACTAAAAATGTCCCATGACAGACCAAAGAACCAAAGCATTTAGCCCATTTTAGCCCAAGTAATTCTACCTATATTAGAACAATGTTTATGCACACTATTTACACTTACTTGATAACCATGATAATGAGATCAATATCAAGCTTTGTAAAAAATATATATATAATAATAATACCTGTCAATTCTATTGATAAAAACACTCATGTATTTGTGGAGTGGGTGTTTACAGGCGACACAGAGGTATGTGGGAGAGAGCTTGGGCA…
CLocus_46586	1	736	46.19	102	32	30788	TGCAGACGCGCGCAAACAGTTTTGATGAAATGATTGAATAACATGTATGTGTAAATTTATTTTGCAACGCCTGCGCACGCAAAGCGGCTGGTTTGTTCAGCAAATCGGCTGGTTATGTTTGGAACAACCTAACAATTCATTTAATACCCCATTTGTAGCTTTTCATCAAACACAGACAAGTGCACAACTCATATGATAAAATACTTTCTTGGGGGTGAAATCTAAATCAGTAGACTATCAGCTTTCAGAATATGACAAGTTTGTGATGTTTTCTGTTCTCTGCCACGAACGAAGTGTAACTCGTCACCATTTCAGGAGGTTCTTATTCTTCTTCTTATTTGGTTTTATGGCGTTCACACATTTTGTTTGTGCGTGCCGCCACCTACCGTGTGGTAGTGT…
CLocus_56460	1	737	46.19	102	322	36761	TGCAGGGACTTGTCAAATGTGTACCACACTATGAATATCTCCCTGTCATTTGGATTTTTTTCAAGTTCCAGAATGTTCAGTCTTTGTCAGGGATCGTGATTTTGAAGAGTAGACATTATGATAATGGAACACAGGAAACGGAAACATTTGGTGCTGTTAATGTTACTGTTAAGTCCAGATCCACAACATATTGGATCCATTTTTACAAATATACTAATGATTTAAGGCTCAGTAGTTTAACATACTGGTCATATGGTATTAGCTGCTCAGGATTACATTATAAGAATTTTACTGGAAAATGTGTTGACATTTGATCTATATCTGTATCTGCCAACATCTGTCAATTTACCTATTGAATTAATAAAATACATTTTGAGATGACTATCCTCCAAGTCCGTA…
CLocus_83142	1	738	46.19	102	159	50906	TGCAGCAGTTGAGATACAAGACAAAGAGCTTCTGCTCCTGTAAGTAATTGCCTGTGGACAGAATCAAACCGAAAGCCTGGTCATAGAACTTGGAGCAAATACCACAATGTTTAATTATGGTTAGAAAACACTATGAACTGATCTTGCACGTTGCATTTGACCAAATACCCACACAATCAATATGAGGAACTGTGTATTCACATCTGTATGTAGATGACACTATGGAAGAGAAACCTTACTTGATGGAAGTCTCAGCATTGAGTGCTGCTTTGTTAAGGTACTCCGAGGCCACTTGCGCGTTGTGTTTCATTGTATTTAAGGCAGCTGTCTCTCTAGCTCGAAGTCTCTCATTCTCATATCGGCACCCCTCTACTTGGCCCTGCAATATAAAGAGTATCA…
CLocus_93079	1	739	46.19	102	218	55574	TGCAGGAGGGGCTGACATACAGGAAGATTGAGGCCAAAACAGATGAGGTGAGAGAGTGAGGAGGGGTAATGACTGACTGAATTAACTAATTATTAATTAACTGCACTTACTAGTGGTAAACCCAGTACTCTTTCTCATTCATGATTTCAGCTGTTTCAATCAGATGTGAATTTGCATGCTCTTGTCAGGTTTGGAATTATGTAATGTTTTCCTTTTTAAAATCACCATCCAGGTGCTCAGCCCGTTCACAGTGGACCATGCCATCTATGCCAGAAATGCCCTGGCCAAAGCCATCTATGGACGCACCTTTACCTGGCTGGTCAATAAGATCAATGATTCCATGGAGAATAAGGTTAGCAGATACTGTAAGTGATAAGCTCATGTCAAGATGGAACAGGA…
CLocus_31519	1	740	46.19	102	285	21413	TGCAGTCCCTCATGATGAGTTCAGATTTTTTGTGGCCCCCACACCCATCAAAGTTGCCCATCCCTGATTTACAACAATAGATATTCTCATTCAAGTCAACATTCTCTGATGTGTGGACCTCCAACCCTCTTTGTGTTACCATTTGAAAGTTGTTTTTAGAACATTTATCAGCCTAGACATGACACCCACCCTGTATTCAAGAGCATGTTGTCTCAACCGATGGCGGGCTCAACACAAAAACCTTAGATCTTAAAAATGGTCTAAGCTATAACATATGCAGAAATGTTTATTTTTTTTGTTGTTGATCATTTAAAAAAAGGTAAAAATACATTTTATATTTTTGAACTATTTGAGGAAATTATCAGTCTCAACCGTTTATCTTTTCCAGTGATGAAGACA…
CLocus_18661	1	741	46.19	102	138	12855	TGCAGTATGATTAGGCTCGGGGAAAAAGCTTATTTCTATCTCTCCCTCCCCTACTATTGTGAAAGAAATGAAGATGAATAATATAATTATAGTGAAGGATTATCTACTATATACAGGAAGGGCTTAAAGCCATGTGCAAGCCACAGAAAAGCCCCTGTCATTGAGATCAAGAGTGTCGCCTCGCCTGGCTACAGAAGGAGGAAGACATCTTTCTGACAACAAGTCCACACGTACCTAGACACTGTCTGTCTGTTCCTACCACCTCTCTCACCATCTTTTTATCTTCCACAGGGAAACGCCACGCTCCATCTCTACCCCCATTTCCTACCACTCCTGGAGTTTAAAGGTAGGTCCTCCCCTGTGGATTGAAATTCTTTCCGGAGTTCCAGTCTTTTTGTG…
CLocus_60763	1	742	46.19	102.28	142	39236	TGCAGAGCGCTACCGCCAACACAGCAGGCTGTGTGGAAATCAAACAGAATAATCAGAAATGGTTAGAAACACAGCCATCGCAGAGAAAGACATGAACCTTGATGCGTGACAAATGTGGACAGTAACAATATTTTAAGTGGTGTGTTGAGAGGTTGTGATTAAAATCGGATGTGTTGCGCGCTGCTCTGAAATGATGAACGCATATATGCATTATAGCAACACAGACCTGAATAACACACGCTTCTTACTGTTGCAAATAATTCCTTTAATACAAATAGTCAGCATGTTCATGACATTCCCAAGAGGACAGAGGACAAAAGGAAATTAAGAATACCGATTGAGGTACAAATCTTCCATGGAGTCAGCAGGTAGCCTAGCGGTTAAAAGAGGTTGGGCTAG…
CLocus_11177	1	743	46.19	102.28	102	7541	TGCAGCAAATGTTTGGTGCTATTCCGTAGTCTGCATTGTAGCAAAAAGTGTCGCTCTTCATGGAGTCATGAGTTTTATGGGAGTTATTAGAATGTTCAGTAAGCAGAAAATGAGGAGAATGCCTGCGTATGTCTGAGACTACATTAATTTCTCTTTCGTGCCAACTAGATTTGTTTCCAAGTGGTCTTTTGTGTGTATTTAGAACAGACATTGGAGCCAGTGACTTTTACCAGACAAGTCACAAGATTTGAGCGACTTATGTTTGAAAGCCCTCCAATGCTGTAACAGGAGTCACTTATCCCACTGACTGCTTAATACCTCGTTCAAAACGACTTGGGACTCAGAAATCTGACTTCAATGTGTTTAACTTCTTTGGGAACGGGGGGCAGTATTGAGTAG…
CLocus_60223	1	744	46.19	102.28	430	38958	TGCAGTGCTCAGTCTGGTCCCACACCTTGTCTAAAGCCCAGGTATAGTCAGTCATCACGTCTTCTGGCACATTCTGCAGCTCCTCCTCTCTCCCAACTCCTGTCTATCTAGTATGGATCCTATCCTCAGCCCTAGTCTGTTGTTTTGTTGCCCACATAAGATGTAATATGATTGAAATGAGAATGGAGAAAATAATGAAACCCATTAATGATTTTCTATAGTATTGAGTGAAACCCTGGCACAGTTCCCAGTGACAAACCGTGGAAAAAGATGAGCTACACATGACTGGTTCCTTAGTATTGTAATGAAGTGAACATTTATTTTGATGTTTAGATTGCGAAGTAAAAAAAGAATCAACTTGATATTGAATGCAAATAGAAACAGTAGTTCAGTGGTCAT…
CLocus_62665	1	745	46.19	102.84	29	40465	TGCAGCACGTCTGTCTGAACAAGAGGGGAGGAGGAGGGAGAAATAGGGGGGAAGAGGGAGAGATTTCTCATTTAGTAAAGATCGCGGTGGTTCTAAATGCTCTGGCGGGTAGCGGGCGGTGAATGCCAACGCCGGTTGATTGGCAGCTGGGGCGGCCCGGCAGCATTTGCATGGCATTTAGCAGGCGAGAGGAGACCGGTGACCAGTGAGAGGCGGGCGGAGTGGGGGGACGAATAAACAAGTCAGCTCTTACGATCACTACCATCACTAAGCCCTTCACAGACACACTTCCTCAAGACCCCACCACCACCTCCCTCATAGACCCCCAACCCCATAGACAGACACTCATTATGGGGTGGCATTTAGCAGGAGATAAGGCCACCGAGGAGAGAGAGAGAG…
CLocus_66836	1	746	46.19	102.84	90	42571	TGCAGCCTTGGATGCGAAAGTGTTTCTCCTGACAGCACCTTTGAATAACAGGGAAAAAAACAAAGTAATAGTTACAACAATTAGTTACAAATATTTTGACACCACACAAAATCCTGAGAATCACAATCCAGACCTCAAATGGGACGCACATCAACACAACGCTACAACCAGAGGTTTTCAATTTCAACACTGCGTCAAACAGATCGAGATAAATATGTGCCTGTTGTAGCGCCACCGTGTGGTCAATCCAAATGTGCTTGCATATGTTCAATCTTGACAGGGTTTGGATGGTAAGTACCAAGTTTGGTTACAGTACAAATATCCTTGTCTGATTTATATGCATTTATGTACCAGACTACGCCCACATGAATGTTTATTGGTCAGTTGTTTGACATACTA…
CLocus_81688	1	747	46.19	102.84	198	50098	TGCAGGGAGTTTTCCCTTATATACTGGAGGTCAAAGCAGACTGTCTCTGAAGTTGGGGAACACTAAACGTATTTTACGCTGCAAGCTCACTGCCCCACAAGAGTGTGAGAGGAGTTCAAACGTATTTCACTCCTCTTTTACCAGGCCTCCTCCCTCCCTTCCTCTCCCCACTCCATTCCTCTCCTCCCTCATTCTTCTAGTGGACTGAGAGCTCCGGAGCCCTCTGAGCCATTCCTCCAACTGAAAGGAAGACAGTAATACAGTTTCAGAGTCTCTCAGGGCTTGGCTTTCATTTCACACATGTCCACAGCAGCTGACTCTGGGTCAGTCTGACATGTTTAAAGCACATAAAAAATACAAAGTGTTGGAACCCTCAGGACGACCCACATCAGTCATCTC…
CLocus_208	1	748	46.19	102.84	49	262	TGCAGCATACTTAGGCAGGCGAGCTAAATAGGATGACTGAAGACAGTACAGTATGGGGAGAACAGAGATAATGTTGTCTGGCTGACTGCTACTGCCTGAGCAGAGATGAGAGGATGACTAAAGACAGTACAGTATGGGGAGAAC
CLocus_21618	1	749	46.19	102.84	99	14912	TGCAGGGACATAAAATGGAGCAAATCATTGAGATTGGCCAGTCGTGGTTAGATTAGATACAGTTGCATGTCAGCATTTATTAATATCCGTTTTCAACCCAAATGATCATTAGCAAAAAGGCTGGGAAATGGGATCAAACATTGATATGATGAACAACCCATTTGCCCCAATTTAAGACTTGTAGTGTTTAGTTGAACAAGCAGCAAAGACATCCGTCAGGTGACTGGAGAAGTCCTCCCCCTGAGGCATGTAGGGATGGGGTTTCATAGGGACGTACCTTGGGGGTGAGCCAAGTAAGAGAAGTGAGCAGTGGAGGACACTGGGATGGGGTTGAGGGCATTCTGGGCGAGTTGGGACTGGGGGCCACCTGGCTGCTGGGTGGCCATCAGCATCATCTGA…
CLocus_6448	1	750	46.19	102.84	234	4438	TGCAGGGGTACTCAATAAGGCTGTGATCCAATATATCTATATTACCTCTAAACCTGTCAGGACTCAAGCAGTGCACAGTGAGCAACGATAGACTCTGCTAGTTAGCATTAATGAAATCAACTAGTACGTCCAGATCGGAAGTGTTTACTGTGTGAAGTAGGTGGGTTAGATCAGTGCTTCCCCACAGCCATTCCTGAAGCATCCCTGGGTGTCCAGGTTCTTGTTGTAGCCAACCCAGTTTCTAGCTGACAAATAGCAAAGGCCACATGTTAAATGCATACAGTATCTCATTGCCATGTGCCAGATATTTCACTGAGCTAAGTCTCAGGTAATGCACCAGAAAACCCATTTGTTTTGTAGATTAAAGAAATGTAGCTGTGTGGTTGGAATGGAAACATT…
CLocus_32977	1	751	46.19	102.84	149	22369	TGCAGAGTGAGTTTATCAGCCATCACAATAGAATCTCTCCTCTCCTGTACTCCTCGACCTTGGCTTCCCAGGTGTTACGTTGGCTGAGACATAAAGCTCAATGTGTCTGACGACTCAGTTTAATTTGATTCCTCTACTCTATTGATTGCTACATCAGTCTGAATCTGACATCCTAGAAGTTGTTTGTGCAACTTCAAAATGAGGGGCGTTGTACAAAATAAATGTATTAGCAATTGAATTGTCTCTAACAAATTTAACCAAAAAGAGTCTCCAACTTGATAACGTCATTGTGTAACCTGACTCTGGCCCAACCCATCTGGTTGACATAGTCTTCAATTCCTCTTTCAAAATGCCAACAGTTTTTTATTTATGTAACCTTTATCTAACCTTTATTTAACC…
CLocus_75564	1	752	46.19	102.84	183	47201	TGCAGATTCTGCAGACTGCATAGGAGATTTTCCTTTTTTCATTTCCCTCTAAAAAGGAGAGAGGGGGGGAGGGTTGTGTTTTTTTCCAAGTCAAGCTGAGACGTGAGACAGACACTTTGGTAAAAAAATATTGACATGAGGGTTGTTACAACCTGTGTCTCTAAATGTCTCAATTTAAAAATTGAGGTAATTTGGGTTTAGTGTGACCTTTCTCTCTCTGTCTGTTCTGTAGAAAAATTACATTGAGGTTTAAACTGCTTTTAAATAAATTCACAAATAAATGATTCAAGGCACTATTCAGTTTTACAATTACAATCCATAGAAATATAAATGAAATAAAACATGTACTATACTATACAACACATTACAATACCGTACAATACTATACTATTCTGACAA…
CLocus_31993	1	753	46.19	102.84	92	21725	TGCAGTTTGTGATGCTTTAAATAAAGATATGTATCCCCAATATTTCCATATTTGTTTGTTTTCCCCAGTCATGCTTATTCAGATATAGACATGTTACCCACTCATAACAACAGTGTCTAGTCCATGCAATACAATGTAAACTACGGCCTAAATAGTTTCTGTTGGTTTGTACCTACATTTACTTCTTCCTTTTTAGACTCACATACTCAGTCATAGACATACCCTAGGCTGCACCACATAATGAAATGGAACAGGACTATTATTTTGGGTCTCTATGACCTATACATGGGGTGTATTCCCTAGAAATCAACATTTGTATTTTTTTTCAAAACATTTTGCTACGGTGTGCACTAATGAATACAACCGGGCTCTCTGATACCTTTGCATGTGGTAATTTCT…
CLocus_20224	1	754	46.19	102.84	151	13946	TGCAGTAGGTGGCGATGCAGAGGAGGACTATGAGCATGGGGTAATAGATGTAGAAACCATCTGCTATGAAGGAGAGGAGACGCATAGAGCCCATGATCTGGTAGACACAAGAAAGATGGAGACATAGAGATCTGATAAAATGGTGGCTCCGATACCTAGAAAGTCTAACTGATGAAATAAATCCCAGTAGGGTGATGGCATGCTACTGAATAATGAACAAGTGGGTTCCTCACGACTTGACTAGGTTTCCTTTACAATGAGAGAGCCCATGTGACCGAGCCTGCGTCCCAAATGGCACTGTATTCCCTATAAGGGCATAGGGCTCTGGTATAGAGTAGTGCACTATATAGGAAATAGGGCTCTAGTCAAAAGTAGTGCACTATAGACTACCACAGTATG…
CLocus_53988	1	755	46.19	102.84	58	35358	TGCAGGTTCATCCGTCCTGACGGACATTTGCTGTTTGTTGCCTGCGGGATTATCTATCCCTCTGTCTGCTGGATGGAACAAAGGCTACGGCACAAACATAATGTTTTCTGTTCCAGCTGCTCCTGTTACATCTCTCCTCT
CLocus_4610	1	756	46.19	102.84	253	3322	TGCAGCATTCTAATTTGTTGCGACAACATCAACATTGAGTCTGCATAAACCATATATTTTCAGTTCATTGTGAAAACCAGCAGGATCAAGTGTACAATGACTATTTTTTCTATTTGACAAATTTGATTATTTGTAAAATGCTTGCTGGATATCCTCCTGGTTTAAACACATGGTGTGAGGCTTTTACACTGGTACTTTGTTGCCTTAGCTGTTAGAGTCATGTAGATGGATGTAAATTGCACTGCCTTATAAAGCTACAAATACTCTGAAGCAGGTCTTATTCAATTGTTTTAAATGTCAGCGCTTTAGTGGCAAGGCATTCATTGTTTTCTGATAGTCTGCTAGAAATGGAAATAATGTATCAGCGTTACTTATTGGACATAATTTGACAGCATAAAG…
CLocus_104283	1	757	46.19	102.84	12	60116	TGCAGAAAGATAAACAAAAAAAATGACAGAGGATCAGACAGAGGACACATCAGACGATCCTAATGGCAGCACTCCTGAAAGGATTGGGTTATCAGACTGTTACAAATGGAAACTCGGGCTTTCTGGAGAATAAGGAAGTTTAAATAAAGACCCTTTCTGATGTCAAAACCTGATGCAAGAGACAAGAGGATTTCTCTAGATTAGAATATACGTTCATGACATAGGATATCAAAGAAAACATTCTCTGTGTCTTTTAACACCAGGTTTGACTGACACACCAAGCTCGTACTCGACGATGAGCATATATTTATGAACTGTACAGACATTTGGGATACAAAGGACGTCCTCGGTGGTCGAAGGAAAATAACAATGGCAGTTTTGCCTATTGGTTTGTATACT…
CLocus_28992	1	758	46.19	102.84	42	19681	TGCAGCACATTCTCCACAACCCTAGCTGTGATGCATCAGACGCCAAGCTGGACGTCAATGAAACACAGGACACTGTGGGTGGAGGGGATACAGGGTAAGGGGACTGAGGAAATAATTGATTCTTTGTGCAGCTCAATCATGTGGAATGATATTGAATTAGATACGGTTTAGTAGGGTCACTGAATCTGGAAATAATTTGTTCAGAGAGTCAGAGAAGCTTATTGTGAAAGTGGTCAGACTTTCAGACCTAAGAGTTGTGTAAATGTGAACTTAATCAATGAGACCTACTGTACCCAGAAATATACTGAACAAAATATAAACACAACATGTAAAGTGTTGTCCCCGTGTTTCATAAGCTGAAATAAAAGATCCCAGAAATGTTCCATTAGCACAAAATGC…
CLocus_29945	1	759	46.19	102.84	24	20338	TGCAGTAAGCTGCAACCACTCTATCTAAACCCATTCCAAGGGGTGGTTGTGTATCTGTTGCCTCCCTTTTTGGGTTAAATAGCTCCATCAGAATATTGTGTTCACTTTAGACCTACTCTGTATCTGCATCCAGCACACTGGTTTAATGGGTCAGGTCAGAGTCTTGTGTGGTCATGAGTCTATAACATGTGTGTTGGTTGCTTCCACCAAGACCTCCTCTGTTTCAGCAAAACAAATGTGGTTGCAGTGGTGGGTTTGCTATGCTGGCGATGCCGGAACTTTGATGTTTGAATAGCTGCATGTATTTGGAACCACACTTCCATGAGATCATAACTGATTAGAATAAATAACTATTTGATTGACTTGTTTTCATACTTTGGTTTTTACTAAGGCTAATTA…
CLocus_90842	1	760	46.19	102.84	99	54651	TGCAGGGGTCCGTCCCACTGGTTTTCCATTTCACATAATGGCGAGTCCCATTACATCCCAATTAAATAGTCATAATCACGCTTGTTTAATTGAAATGAGCATGGCCTTCAATGAAGCGGTCCCAGTAGGTACCTATCACCCATATTCCATTTAATTCTACTGTCGATTAACCACACTTAGACACAAGGCTTGTATTTATCAACAACACAGTGTGCATCCCAATACATTTGTTATGCTTGTTTATATTTGAATATTTTATTCTCGCTCGCTTAACTACATATCAGCAGAGAGATTGATAATTTGCTTCTGGGCTGTTGTTTAGCAAACTGCCTGTCTATTGGGTTTTGATGGATGCTACTGCACCAAGAATGGTCTGCTGTGAGGGAAATGACAATAGGT…
CLocus_34142	1	761	46.19	102.84	266	23051	TGCAGTAATGACAGAAGGACACTCCAATTAAATAAACACTGTGCTGACTCTCAGGAATGGAGCAATGCTCATAGAGCTTCAAAGCCAATGCTGGAATTCTGGCCATGTCATCCTCATACCCCTTACACACAATCATCCCTGTATCCCTAAATCATGACACAAACTCCCTCCCTTTCACCTCTAGCCCCTCACTCCTCTATTCTCCTCTCACTAACTCTGTAATTCTTTGTTCACTCCTCCCCTCTTTCCCAATGTTATGTTCTGTCCTTTCTCTTCTGAAGCACGTTTGGCAGGGTCTCAATGGTTGAAGTCTCAATGGTGCAGTACTCTACTGTAGGGGTCATCAAAAAGTTACCGCAGCCACAAAGTAAACCCTGCCTATATCTTCAATTTCTCATC…
CLocus_25711	1	762	47.9	103.12	21	17412	TGCAGTGTTCCAACTGTGAACGTACGAAGGCTGCGTGGTAGCAGGTAGAATGATTTGAATATGCCCAAGGACACTGCACTTTTCACTTGCGTAATCAAATGATTCATCGAGAAGCTGAGCACTATTTGATAGAACAGCTTATAATGGAGCTCAGTGCACATGTTTTTACAGCCCGATGTTCTCACCAAGATGCCCATCCTTCACAATGTACCAGATCTTTGTGATAAAGTCTGGTGTTTAGACAACAGAGTAAACCTAGCGTTTCGATAGAACTCAAACTGCCCTTAGCTGACTCATTCACAGTATTGACCCTACATCTGTTTAAACCACAGGTGAGGATAGTTCTGAATGAGGAGTTTCAAACGTATCTCTTTACGGACAACCAACAAGGGCTTGGTA…
CLocus_40479	1	763	47.9	103.12	273	26985	TGCAGTTAGAAGGTACAATAATGCTGCATTGTGGCCTGTAGTGTCTAAATTAGAAATTATAAAGCTATATTTTGGAACATCATTATCGATTCCGCTCCCATGGATAATTTTGTGATACAGTATTGAGTTAGCAATTCTGTGTTACTTTTCTGTGTTTGTTGCCTCTCTCCCTAGCTCCATTTGTCATTTACAATAGACAGTCCCACATATATCATTTACAATAGACAGTCCCACATGAACACTGGTATGTCTCCGCCCCATCCTGCTCATCAATCCATCAATTACTGCACGACTTCCTGTTCAAGGTTCATGAAACAAAACAGCCCCCATAGTGGCGTATGTGCAGAATCTTATTTTGGCTTGGAAAATGAAAATGCACAGGGCTAACAGAGATTCTGA…
CLocus_75548	1	764	47.9	103.12	238	47181	TGCAGAGTTGAAACACATTGGATTGAATTTATTTGATGATAAGATCCCAATTCATATCAAACCAGTTTGCGTTCACTGTATTTAGACTGCATATTCAGCTAAACCTTAAAGCTGGGATCAAGATACATACTGCAAGCCAGCAAGCTAAGTAATACTTATTTTTATTTTTTTATTTATGCAGTTGGTTTGGGATTATTGCCCCCTTGCAAAGTGCCAAACACGCTTGCCAGGAAAGTTCCTTAGTGCTGGGCATTGAGCTTTATTCAGGAGGGCGATTAAGACTCTAGTTTCATGAGCTTAGAGTAGAGAACACAGCTGGGAGAATCTGCACAGGTTAGCATTGGCACTAAACGGTGCAATGCCATTAGACAACTGGTCTCACTCGGCTGACAGGAGCAT…
CLocus_6374	1	765	47.9	103.12	100	4403	TGCAGACAATCTTGGCTTTTGTTTAGGGGACTGGGTGTTCACTGGTGCTGATGCGAGTTTGTCCACGTCCTTTGTTGTTTCTGTCACACCTAAAAGGGGACATTGGAGGAAAGGCATGTGCCCGACTTTCTTTGTCATGTGAAATTGTTTCCGTCTATCGCCTTTACCAAAACAATATATATTTTTGTACATTTCTTGATCTTTCTTATTAGACTATTATCTAACCAGTGACTGGTTGCCTATACGTTCATCCAAATCGAACTATAGCCGAAACCTGGTCTACGCAAATGTGATCGCAAGCATAAAACAAAAGGAAACGTGGTATTCACAACGTGCAATGCTTTTATATAGGCTATAGACTATCTGTTTTTGTTGTCAGTAAGGACATTTTGAGACAAA…
CLocus_57412	1	766	47.9	103.12	239	37346	TGCAGGTTACTACTCTGTAATGGTAACATACAGCTTTCACCTACCCCATTTTCCCAGATCACTGTAAATGAAGTGAAGGACCCAAGGAGAGGAAACCACTAGACTATTGAGATGCACCCACAGAAACCAAGCAGGATTCCTTGGGAGAACTAGCTGCTACCTCACTAACCAGTGAGTGAAAGGTGTGAGGATGATTACAATTGAGATAAGCCTGAACTCACGTTGGCCAAATCTGATCCAATGAGAGTCTATACTCCACTTAGAGCTGGGCGGTATACCTTATTTTACGATATACCGGTATTGATGCACGGACCAGTTTGGATTTTTACTTTACCTTCTATAAACGGTATTTGAATGTTTGCTAAATGTGATACGCCGTGTGTAACATCCATTCTTATA…
CLocus_102735	1	767	47.9	103.12	12	59472	TGCAGAAAAAAACCCTCTGTTTGTATAAGTAATTATCAACAATGCAATAATGTTATATTAGACTATATTCAATTGAATAGAAGGCAACGTTTTTATTTTGCTAGAATTACAAGCAGTTCAGTTACATAAATGTAATTAATATATTCACAATAATAGTAATATAATCCCAAAGTTAGCCTATACCCAATTTTCATGGCATTTACTGTACTTTGAATTTACCTGTAGTTTGAATTTACAATTACAGTTTCAATGTTAAATTAATCAAGCATTTTCTACTAATTCTTTGTAATGTAACATGTTTTCCTGAATCTGAATCAGACTGGATAAAGGTGGTATAGGATTGCGTAGCCTAACAAAGCAGCTCTTCACGGCACCATAAAGAATGAGGGGAGAATAACT…
CLocus_92167	1	768	48.19	103.12	156	55174	TGCAGAACAAGCTAAACCTGCACATCCTCCAACACGATTACCAATTGTTGGTATTGAATGAAAGTTTACAAATATTTTTTGTGTATATATAATGTTAAATGAGAATCTAACATAAAATACTCCAATACTAAGGCCTTTGTTTTATTGTATGCCTTCTATTCGCGGGACTTATATTTTGAAAGGATCTTGCAGAAATCGCAGCATGTTTGTTGCCAGCTGCTGTTGGTTGGCTTTGCTGGCTTCACACAGATGAAACTACGCGGAAAAAAGTTTTGTCCTCATCATTTCCGCTGTCAAAATTGCTGCGGTTGAGTGCGTGTTGATGTTGCACATCAAGTAGACGATAGCCTATGCATTTAATATAACTTTTATTATTAAAGGAGCTGATAAAACGCTGAG…
CLocus_26756	1	769	48.47	103.12	100	18208	TGCAGGGGCTGAAAAGGGTGTGTCTGATGGCTTTACTTTCAAGGAACACACAAGGGAGCGAGTACTATGTAAACGACTGGAACAGTACAGAAATAATGTACAGGGGGGAAGATCGGTAAACCTCCTCCGTGACAGAAAAACTAGTTATGGATTTGGTCATTTACAATCACTCTGTATAATTGGCAATCACGACATCTTCATAACACCATACGCAACACTTTTTGCTCTCGACGTATCATTTAACATATTGCCTTCATGTGAGAAGTTTTACAGGAACACCATCACTTTTTACAGTTACATTCATTAAAAACCTGATTATTTATTTTTTTAACAAAAAAAAAAAGGATTTGAACTGCCAATATCCTGCATGATTAAACCTACAGGCTCCCACTCTGAATT…
CLocus_20747	1	770	48.47	103.12	15	14274	TGCAGGGGTTATACCGTATATAGCCATGATCTATTGTTGTGGTGACTGAATTAATGAAACATTTCCATTGGAAAAATTGCATGACACAGCTGATATAGGAAGTTAGCAATCAAAAATGTCCTGTGACACAGCAAGGAAAATGACTTATTGAAGAAACGTCATCCGTCCTTTGGTTGAATCTGTGACGGGAGGGAGATCTAGTGTTTCGGTTCATCCCACTAAACCATCCGTGTGATTGAGATGATGTGAGGGGAGCTCGTATGCCGTGCAGTATTCACTGGTCCAAACCACTGCTCTCTCTGGTTGCTCGGTGCTGTTTAGTTCATGTGATGAAACTGTTCACATCTTAAGAATTGAGATTCAAGCCAGAGGCTGAGGTCCGATATGGGCTGCTGAAGT…
CLocus_39629	1	771	48.47	103.12	181	26424	TGCAGCAGGGGAAGGAGACTCAGCTGCTGCATGTGTTTGAAGAGGATCTGATTCTGGGCAGTGAGAGGAGAGATGCCACTCAGGAAGCTCCCGCTACAGAGACTGGTAGGATTAGGGGAGACACTCACTAATATCAACCTGGTCTTTACTCTCCAGTCAATCTCATTCAGTCTGATGTACGTGTCCTTGTGTGTGTTTGTTTTTGCTCCTGCAGCCTCCAGCCAGCCAGGCTTCTCCGCCCGCTTCTTCCTGGTGGTGGTAGAGTTTACCCAGACTGGCAGGTCTTTCCTGCATATGTGGCACCTGCAACTGGCAGCTGGCCAAATCACTATGGGTGTGTGACCTTTAAGGGTCCATTTCTATGTTACAGCATTGTTGGGCATTGTGTGCCAGTCAGCC…
CLocus_105858	1	772	48.47	103.4	124	60677	TGCAGAGTATAGACCTGTTTCAGGTTTGCGCACAGGTGGACCCTGTCTTAAATTAATGTAGAGAAATCATCCTGATGATACCCCTTGATTTGCAGCATCGGCACCAAGAATACGTGAGAAAACGGTCTTCAAATGTTCTAGAATAGTTTTTACGTGGTTGTTAGCTTTTGACAGGCAGTGAAGCGGATGGGTTTCTTAACTATTGTTATTGCCACGTGCCTGAAACAGCCTTGGCGCTTCAGTCTAATTCAGTGCACAGTGTTGAATCAACGTGCCACGGTGCTCTGTCTGTGCCCAGGATCATCATGACTTCATCGGCTGCTGGCATCTACGGCAATTTTGGGCAGGCGAACTACAGCGCGGCGAAGCTGGGTCTGCTGGGATTGGCCAACACCCTAG…
CLocus_21660	1	773	48.47	103.4	78	14939	TGCAGCTCCGCATGGCCAACCACACGGCCAGGGACGTCTATGTACGCCTGCTCGGCCACGGGGAGCGCATTTCTGGAACCGGTACGGAACCATGGAATCAATGGGAAGGGGCGGGGGTGTGTGTGTGTGTGTGTATAATCAGTAGTGTATGGGTCACAGTCCGGGGGGAAAAAACAATTTAACAATGTACACTGTTAACATGTCTTTCTAACCTTGCTCCATAAACTCTGATTTACTGCCGTTGTTGTCGGGTCGAGCCTGTTGTTTGTTAATGGCCTGTATATGGTTTAGTGTGAACGAGACATTGGCTGGACTGGAGCATCAGTGACGAGCGTCCACTGTATCTGTGATAGTTTTATGGAGCTCTGCTCTCTCTGTTGTTGGGAACTGGGACTGAAC…
CLocus_33206	1	774	48.47	103.4	86	22487	TGCAGCACAAGGTCCAGAAGATGAAGCTGGTGAGTTTACTATTGGACTATTCCTCATACAGTTCCATCTAGTACACTCTAAAGATTTCCTCTATAGTCCAGGCCAAATTTGAAATACATCTTCACTTTTTATAAAAGTATTAAACTTCATGAAACTGAGGATAGTCGCCTTTGAATAAAATACATCTATGCTGCTATCTGTGCCTCTGAAGATGCTGATTCGCTGAAGGCAAGCAGCATTTGTGTTACTTTATGTCTACTCCATCCTCAGATTGAAGACCAGTACAATAATATCAACATGAAAGACGAGTCTTCAACCCTGAAGAGGAAGATAAACGAACTGACTCTGGTGAGATGGTTCTTCCAGCTAGTTCTATATCACTCTGTACATATCCTTTAT…
CLocus_8259	1	775	48.47	103.4	12	5569	TGCAGTGGACCCAGTGAAGAGCTCATCCTCGTCAGATGACAAACACTCACCTTGAACTTAGCATGACACAGAGAGAATCCTGACTGTTTTATTAAGGCTGTTTTACGCAAGAGAAAGACATCTACCCCATCCCCTGTACTATTAGCCTACATGAACAACTGTCAGAGTAGCCATCCCCTATTACCACACAATAACTTTGATCCAATCCCAAATGGTGTTGTTGATTCTCCATATTGCACAGGTTTGGTGTTTGAATGCAAGGTGTTTCTAAGGAAGTACAAAACACTGACAAGCAGGGAACCAAGAGAAGTGGGTATGTAAAAGCCTCATGTGCTTTGGCCTGGCTCTCGGAGGAAGGGAGAGAACCCAGGTGGCAGACTCACTGAGACAAAAGAAAGG…
CLocus_47007	1	776	48.47	103.4	24	31052	TGCAGTGGGTGGGTGGCTTGGGGAGGTCTGGCGGTCCATATTCTGAGGTAATGCTATTCCATCACACGCTCTCGTGCTCCTCTCTTCTTCTTCCTGTAGCTTTTCTGTCAGTCTTTCACTGTCCTATCTAATAAAGAGTCAATGCAAAAAGGAGTGTGACTGTCCCTGTCCTTTAAAAACAAGTAAAGTTACTCATCAGTGATATTCCTTGGACTCCCAGTCAACATTATGTGGTGAGGTGACTGAGCGCTCCTTTTCCTGGAATCTGGACATTATTCCCAATCTCATCTGTGGAAATGGTTCCCTCTCTCGTTCCTCTACTCTGGGAACAGTCTTGTCGTGAAGAGGGCGTGACAACGCATCTTCCTCCGTCGACAGCATATTGACTGGCTGCATCAC…
CLocus_48773	1	777	48.75	103.4	55	32135	TGCAGTACTGACATCTAGTAGTTAGCATACTGCTATTAGGATTTCACATTTGTCTTCAAAATGGAAATCCCGTATTAAATGGCTGAAGAGTGCAGGGAATGATGAGCTATTGGAGACCCATGGCTTGGCCACGCTTTCAACATGTCTGTTATCATGCTGTTCCAAATCTAGCAGTTGGAACAGCATACAAGATTATGTGATTGTGCATATTCATAAGTTTGCGCATGTGTGCAGCTATTTTTCATGTATGTTTGAGATACAGTGCCTTCGGAAAGTTTTCAGACCCCTTGACTTTTTCCACATTTTGATTAAATCGTTTTTGCCCCCTTATCAATCTACACGCAATACCCCACAATGACAAAGCAAAAACGTTTTTTTAGAAATGTTTGCTAATTAATA…
CLocus_23738	1	778	49.88	103.4	269	16174	TGCAGTACATGTGTACTGTAGACATAAATGTTGACTAAAGCACAACGGGGATGTTTCCCTTCCATGACGTGGAGGTTCACCGTCAGGTTGTGTGTATAGGACATGGGAGAATGTCACCTTGGTGAAGGGGGTGGCGCGTGGCTTTAGATCTAATCAAGGGGTGTTTATAAATGTTTGTGATGAGCTTACGACAGCCTGTGAGACCTGGCATCACAGAGGCAGAGATAAAAATAGCAATTCAGGTGTGTGATGAGTGACTTAGTATGCACGCTGTCCCTGCCTCAAGGACACTTCTGTGTTGGAGAGATGCTGCTGCATCGCTTGACCAGAGAAAAGTGTCTCTGTCTGCCTGTTGGGGTCTGAAGAGCACTGAAGTGGACAGTGACTAAAAGCCTTACA…
CLocus_75694	1	779	49.88	103.4	114	47263	TGCAGTTCATTTACCCTGAACAGCCTATAGAGGACAGTATTGCTCAGTCACTCCAGTGAACGCCCTGCTCCCCTCCCTCCCCACCTCAGCAGAAGGAATCATAGTGGGATACAGTAGATCCATTTTCACATCCCATGCTTCAAACCAAACTCCTGGCTGAGCTCACAGGAATCATATCAGTAATTTTGCCTGCGTAATCTTCGATACACTGTGAAACTGAAAGGCAGGATGCATGCAACCCTGGTGCAACTGCCATGGAAAACAACAATGCACAACCGCCTAGTGACAGACCGTTTGTGGGGTGTCTTCACATGTTACTCTCTCAAACTGTAACTCATTTGTCAAAGCACCTTTGCTTTCCCTCACCCCCCCC
CLocus_4725	1	780	49.88	103.4	201	3390	TGCAGACACTGCCCTCCGTGGAATGAGTTTGACCCCCTTGCTCTAGAGAATCTTGGCATATCTAAAACTAACCCCCTGTGTTGTGTTACATAGAACTAGGTCCCCTGCTGCTTCTAAAAGTGAATCTACTGGCCTCCTCCACAAGGTACTGAATGCATCAGAGGCTACAGGGATGGGAAACCCCTCTACATTTGCCCAGGCATTAAGAAATTCCACTTTAAACCAATTCCTTTATGTCCATTCCCATTTCTCTCACCTCTGAGATTCCCATCCAGAGCTGTAGCTCGCTCACTCACTCATTCTCCAACCTACTTACTAAGACATGCATGTGTTGAAAGGGGAGCACTAAACCCTGAAAGCACCAGGCCAGGAAAAAAAAAAAAACTGAACAAAACACCA…
CLocus_87328	1	781	49.88	103.4	118	52998	TGCAGGTTCTGCCCCCACAGGACTCCTGCAAGAATTTAGCTGACCCTGTAGGAACATACATATTTTTTACCTGATGTGCAGGATCTTTGAAAATTCCTGCACGATACAGCCGATTCCGGCATGAGTCCAAGTCAACTTTTCCCCTTCAGGATTTCATAAATCCTACAGAATTCCTGCCTCAGAAGTAATTGTGTCAATGACCTGTATAACTTTTTTGTAAGGGTAGATATGCTTACTTTATCTGCAGAGGCAGTAGCATCACATGCTGTCTAATGAGGATGGGTGGATCAGGGTCTGGAGTGAGGAGAGGGAGAAAGGTCAGTATGTGTGCATTTCATACATTTTCCAGTTTCCTTGCACTTCAGTCTCAAAATGCTCTATTTCTAGAGAACACATTTC…
CLocus_9100	1	782	49.88	103.4	119	6103	TGCAGACAATATAACACTAATAACAATGAGAAGCACCTGAAATGAGAGCAGAGAAACTGTAAAACTAACCATGCCTACAAAATGTGGGCATAAATTCTGTATTCTCTAAAGAATACTTGAGTGAGAACACAAGCCCTTTTCTGTGCTTCGCTGAACCAAAAAGTCAATGAAGCAAAGAGTCTCGTTCGGCAGTAAACATACCTCGCGATAAACAACAACCCCCTGATGTCTCACGACAGCACCTTCAAATCAACTTCACTGTGGCGTCAATTCATTTCCTATCATGTCAACAAAGCCAGCCTTCTAGAGTTTTCTTTCCTAAGGATGTAGATATCAGTAGATATCTTAATAAGATGGTGTTCATGTTTAAAGACGCTTAATAACTCTGCCAAAGTCTGG…
CLocus_17548	1	783	49.88	103.4	242	12063	TGCAGCAGTAGACATGTGATGTGTCTTCGTCTCTGATCTGTCTCTGTTGCTTTTCATGTACTGTAGACCTTATTACATGGTGCAATGTCTATCATGGAAAAGAATTGAATCAGGGCTGGTTTCCATGCCAGGCCACAGAATCCACCCAAGTTATCCATTAAGAAAAGAAAGGTACCGCTCTACCGTAATAGTGCAGCAAAACCTTTTCAATAAAGCTATCAAGAGGTGAGATGTCTTCGAGTGGATCTCCTATCAAAGGCAGCTTCACTTTTACAGGGCCTTCTCCTCTGCTACTCTGTCCTTGTAAAGAGATCAAATGGCTGCTCTCTGACTCCCACTGTTTGATTCCCTGATACTTTCATCCACTTCAGGCCCGGCTGTTGTGCTGGCACGCCGTCC…
CLocus_1335	1	784	49.88	103.4	140	1258	TGCAGACTAATGAGGCAACGGAGGATAAACAAAATCCAAATGGATCAGCAATTGTACACACACATGGAAGTTAGGACGAGAGGGTGGGGACTGTCCAATTCAATAGACTTGAGGAATTAAAGAGATCTAGTGCTTTATCAGACGGTATATGACAGCTAAAATCAGAGCACTTAACCATCAGAGGCTGAAAAACACTTTGAAAGTCGTAAGCAGATATATTGTTACTCTGGGACTCTGAAACGCTTCAGTCCGTCTAAAAGAAACAAAGCATTCAAAAGGCTGTGATTTCTGCAATCCAACAAAGGAGATGGTTGCTGAAGTGATAGTCACAGAGATTTCATAACTGTCCACTGTATTTTATCCCACAGTTCACTTTGAACAGTGGAGCATCTGTCTATT…
CLocus_13611	1	785	49.88	103.4	102	9293	TGCAGTAAACTAGGGCTGAGAGCTGGGTCCACTGTGGATTGAAGCCCAGTGATAGGACTGGGAACCCACATTCCTGTGTCCTGACTGGGGATTTTTCGCAGTGGTGTGCACAGTGTGTTAGTAATGAGGTGGAATTCTGGGTCAATGCAGGCCTCAGACAGACCAGACATTACAGTAGCTGCAACATGCCTCACAAGTCAGTGTAGGCATACTGCATACTTATCATTACTGTACGACAATACATTTTTTTTTTTTTTTTTTTTAATGAAGGGTATCTTTAAGATCACTCAAGTTTGTGTAGTTCATGCAACAAGTGGCAAACGGCTAGTATTTTTGCCCTTGTTTGAGGGATTTTCGTGAATGAATTAAATGCTTTACCATGGAGACAGAATGCAATGG…
CLocus_118648	1	786	49.88	103.4	133	65339	TGCAGCGACAGTTAAGATTGGGCTCCTCTTATGTTTGTTAAAAGGTCCCTTGAGGGGAAATAAACATTTCAGAAGGTTGATTTGCTCTTTAAGGCAACAATTTCCCTCTCCAGGTCTCCCTCCAGGTCTCCCTCCAGGTC
CLocus_112142	1	787	49.88	103.4	37	63297	TGCAGCTGTTCAGGACAACCCAGGGTATAACTCATGTCATTCTTGTAACTGTGGATCATACACAGCGATCATAATCGTTGATACTGTAAATTACTTGAGTTTTCAAATATGGAAATCTGAAGTTTACTAGTGTGACATCAAAGCGCAATTTATTATAATATTCAACGTCTCATCTTTCAGAACACATCGACTCCTCTTGATTTACAGCATTTACCTCACTCAGACAACAACAAATTCGCAAAAGTAGCCCAATTAGCAGGAGGAATGGGGGCATCTTCTTGTCGTGCACAGTGCTCAAGTATATAACGGCTGTCAGTCAAAACCCATACGGTGCTGTGAAGCGGAGAACCTGAGCTCCGACATCAGATATAACATTTATCGTTATTTATCGTTTAGCGT…
CLocus_97524	1	788	49.88	103.4	130	57354	TGCAGGTAGTGGAAATCAATTACGTTCTTACCCTTTGGTTGATCTGTTCTGTGTCATTGCTTTTTCAGTTAGTTTTGTCAGTGGGTTTCCCACCTTTTACTTTCCACCTGATTTTGTAATTTATTTAAAATCATTTACATTTTACGTGAATCTTTATGTCCAGGTCATTGTAAACACATGCTCTTCCTATCTCTTGTGTGATCCATTATTGAGAGGGGTCACCCTGTAGCGAGAGCTGCCGGAGAAGGAAGGACCCGTGTTTGTTATGTCGTACACTGACCCTTCCAGTCTGTTTGTCCGCCTGTCTCTGTGCAGGCCCACCCTTCGATTAGTACTCTAATGGCTGTTCTGTCCTAGCAGGCTCCATCTCCTCACCAGGATGGAGACGTGGCTCTGTGA…
CLocus_16933	1	789	50.16	103.68	169	11667	TGCAGCCTCTGGAGGGGCTGGGTTAGGAAGGAGGAGAACGCACAACACCTTTATGGTTCAACTAGTGGGGGGATCAGATTCAAATATAGAGCCAGTGAGAGCATAGAAGACTCCACAACACTACGTAATGAGATCTGCTTGAGTACTGGGGTTGAAATTACAAATCACCTCTTTGGGTGATATATCTGGGAGGGGGAGGTCACAGTCCCCATCCCCAGACCCCCACCCAAACGGTTTCCTTCCATTTGTTGCCTTGTGAAGACGACCCTGGCATGATCCTGGTCCTGGGTTGGAGCTGTTCGTTCCTCTACTCTGTCTGGTCTAGTTTAATGAGAAATCCATGCAGCGCTGCTCCATGTAGCCCTCTTCTACAGGTCTGAACCCTGTCCTAAGGACAGC…
CLocus_18630	1	790	50.16	103.68	200	12828	TGCAGTGTTTGCCAACGTGCTCATATAGAGGGGGATTACTATAAACACTGCAACAGGACAACTTTCCCTTTCCACACAGGCTCTCTAGGGACACCTAAGCATACACATTCAAAGTAATTGGAACATGACCCAACCATGCTGCATAGGCCAAAGTGGTAATCGATTGTATACAACAGTACATGGGGCGTGCTCTTTCAGGGGACACCTCACAAGTTATGTTTATTTAGAAGACAACACCTAACAAAAGGCCTGCCTGTATATTAGAGAATTGAAATAACCCTTAGCCTTGGTAAACTCGTTACTGTGGCTACCAGTACTCCGAGCTTGTAAATCACACTGGCCAAAGTCATCGACATCTCCAATGACTCCAACCCTTCCATTGGGAAATGGAGCACACAT…
CLocus_39875	1	791	50.16	103.68	206	26612	TGCAGGCCCATACTTCCTGGAACTCTCCAGGATTTCCACTCTGAGAGAGACTATCTTCCCTGTTCTTTTTTGGATTCCACCATAGCTGCTCTCACACCCTGATACGCACCACAGTTTTAATTTTGGCGGGAGTCGGCAACAGCTGAGGCGGAATCCTGTACCGCAAGCTAGAGGATATTTATTTTGGGGCCTTTATGGCACCCGAGATGCATTGCAACAGTGAGCAGCCATCCATCTCGTGATAATTATGACCCACCGACTCGGTGATTGCATTAAATCTGTGTCGCTGCCTCTGTGGAAAATAAAACGCTGGCACGGGGGTTCTCACTTTAGTTCCTACCTGCTTCAATTAAGTTCCTGCTGTTTTTCATTTGGGGCATGTGGCTTCTATAACCTCCT…
CLocus_84892	1	792	51.01	103.68	136	51790	TGCAGAAAGCTGACATCCTCACTGACATACCGTAACACGTAACGAGAGGTGCTGTAAAATGTGTAAACGTTATGGCGAAGAGGTGAAATAAACAGGCTGTTGGCCATTGGCAGGCTCTCCCAAACGACCAATTTCTGGCTTTTGAGGTGCCGCTGGCTGCATCCAGTCAGCCTGGTTCTGGTCGAGGGGGAGGGAGTATGTGTGCGCATGCATCCACCTTGGCCACAGTTTGCCTTTCCATCTCGCCGGCCTGACAGGCCTGAAAAGAGCTTCTGTTTTAGAGCCAAACTCATCCCACATTAATCAGAGCCATGAGGAGGGGGGAAGATATACAAATGTTACTGTCGACAGCAGCTACACAACCCCCCCCCC
CLocus_13794	1	793	51.01	103.68	147	9450	TGCAGGAATCTCCATCGCCATATCCATCCCAAAAGTCAGATAAACTGTCTGATCATGTTGAATGATGAGATAACACATCAATGATGTAGCGTACTCAGTCAAACAGGAACTAAAAGTAGATTGGGATCGTATCATTTTGAATGTGTTCTAACTGTGTGATGCTCCCACCTTACAAAATTGCAATCAGAGCACAGAGATTGTTCACCGTACAAAAGTGTACAGCAGACGATCCAAAGAGAGAACGCAGCTGAATGACCCAGTAGTCAATCTGTTGGAGAGTTCCTCTTTAAAGTCCCAAGAAGGACCTCCTGATTCCCTGGATACAATACCTACAATGCCAATGATGAGGTTGAGAGCAGAGCAATGCTTGTCCCTCCCACTCACTGTAAAGAGCCGCTC…
CLocus_7432	1	794	53.01	103.68	243	5025	TGCAGAGAGGAATGACAGACATCAGCATCTATAGTTGAACGTTCATTCCCTATGTAGGGCCTACATCAAAGTGGAAGGGCTACAGGCATGCAAGCGCATGCCTATGACGACTAGGGGGGGGGGCAATGACGTTCTATTTACATTCATCAGATACTGTCAGCTTTCGTGTGAAGCTGTCTTGTAATGTTTGTTGTTGGGGGCCTGCGCTGCTGCCAGCAACTGTTTGGGTGTCACGGTGCATTTCTTTCAGATGGCTAGGCATTGAACCTGTACTACCATTACTGTCCCTCAGTACCACCTCAAAGTTAGCATTTCACCACCATCTCATTTAACATCTCAAAGTACTGCCATATTGGACTTCACAGCGGTTGCTTGCCATTCTCTGCCATTTTCCCAACT…
CLocus_88980	1	795	53.29	103.96	47	53863	TGCAGCCTCTTGGCTGTATAAACAGGCAGCATCCCTAAACCACACCGGGCCTCGTCCCGCCACTGTTACCGACACGCTCCCAGCATCCCCCTCACCTGTTCCTCCACACACAGCTGTCTACACACACAGCTGTCTCCCACATGTTCCTCCACATTCCATGAGGAAGAGAAGGGGAAGGAAGAGAGGGGGGGATATATAGCACAAAAAAATAAGATTCAGGAGAAAAATCTCCCTGGTATTCCGCCGTAGGACAGAACTGTGCATTGCCTACTGATAGAGATGATGTGAAAGCAGCAACATGGAGGTATGGTGTAATCCAGACGCCATATTATAATCTTGAAGAGCGTGAAAAACATCAGTCTGACAGCAGGTCAAAGAATGCAAGGTTTCCTCTTTTTG…
CLocus_158	1	796	55	103.96	20	167	TGCAGAACACCCTCTACCCCCAGTACGACCCTGTCTACAGGGTGGACCCTCACGGAGGTCAGCTAGCTTTATAACCCCTTATAACCACACACACACACACACGCGCGCTTTCGTCTGAAACGCCCTCACCAATTTCCTCAGCCATTATGCCTGTCTTGTGACAACTACGTAGTCGTAGAGAATGTGTTCTGCTGTTTACAATCAGACTGTGGGTCACATTGAATGGAATTGTTTTCCATTTGATTTTCGAACACCAGAAGATGAACACATGAAAATAAGAATGAAAAAAGTGTATTTCCAAAGTGGTCTATTTTTGAGATGCAATTTGTTCAAGACGGCAGCGCATCACTCTCTCGTCCCCTGCAACAGGTGGCCTGCTGAGCTCCAAAGCCAAGCGGG…
CLocus_77511	1	797	55	103.96	30	48157	TGCAGCAACGAGAAGAAAATGATTATCGCTGGCGCTGTTGTGTTTGTGGGGTGTAAGTCCACTTTGTAGTGTTGCTTCTACTCTCTCGTACTGTCGTGTTCAATGTAGAATTCCCTACATGCAAACCCTCAAACTTTCACTAGTAGTGAATCAATCGCGGCTAAGCTGCATTGTATGTCTTATCTATTGTATGTGAATGTCTATTGGCTAAACATGTTGAGATTTTCCTTGACCATATCCCCCCCCCCCCCC
CLocus_36387	1	798	55	103.96	40	24401	TGCAGATGAATGGGACCTTGGAAACTGACCAATTTTTTTTTATTTTTTAAAGCCTAATAAATTGACTGAATTGCCTCAGCCGTACTTACTAGCAGCATAGAGGGCCACCTTGTCCTGGTCTTTGTGCTTTAGCAGGTTTTCAGCATAGTTCAGGCGGCTTCCTTTGAACCACTCTGGGACGTCCGATATCCTCTTGGAGATATCGACCACCTGAGGAAGAGGGGGGAAATGGCTAATGTTCTACATGATTCAAAACCGGGTTAAGGGAATAACGACTACAACGTAATACTGCTCTAAGCACAAGGGTACTGATAAGTAACTGATTGACTAGATAATCGATTGGCCCCCTCATCAAAGAACTTTATAAACTCCACCAATCATAATGTAGTATAGCCTACG…
CLocus_54921	1	799	55	103.96	228	35859	TGCAGTTTGAGCTAAACCAGGGTCAAAATCACACTGTTTCATTGGAGATCATTCAACCATCATAAAGGGTTTGGTTTATCATCAGTGTTTATCAGCATATAAACTTCAATTACCAGGAAAAGCCAATACACATTATTTCATCACTCTAATGGCAAAGCTTTTTTATTGAATGTCTGAACATCTTGCTGGGTTTTGGGGATACATGTCTGCTCCTATCTTGAGCTAGCGTCCCAGATCTCCTCTTCCAGAAGACAGCATTTACATACTCCCTGTCTTGGATTTAAATGCATATATGATTTGGTGTAAGGCGCGGCGCATTGGAATGAAGGGAGTTTCTACTGTTGTTAAATTCAAGCGATAAAGTGGTCAAGTGGTCAAGGTCACAGATGCAGTGGAAAT…
CLocus_26562	1	800	55	103.96	210	18033	TGCAGTTCCTCCTACCCAGGAGACATGTCTGTTCCTCCAGACTATATCTTCTGTATACATTTCAACACTATGACTTCCTTGTCAACAGCAGGTAAAGTATACACATTTATGGTATATTTCATCTGACAAAGCTTCATGACAAAAAAACATTTTTCTGGCTTTTGCAAGCATGAATATTTCAGTTGTATTCTTCAATGACTAGTCCCACCCTCTCAGCTATTGGTTGTGATCCCCTGCTCAGACGTTGCATGCATCAACCAATGGTGGCATGCGATGTCATCGACTGTGCAGTCAGGCACCAGATTGCTGATACATGTGGTTAGCTGATACGTATTGTAAAACCTGGCATACGTCTGAGCAGGGGAACATGACCTGTGACTTATACCTAAGCCTGACCCT…
CLocus_20705	1	801	55	103.96	134	14251	TGCAGATTACTACGAGACGAGACTAAAGCGAGAGAAGAGGACAGAGAAACTCTGCCATATGTGTAATTTATGAATTCATTTGAAAACCTTAACCTATCCGATATGTTGTAATATTTCCCACTAGCTTGCATAAGCATGAACCAGATTATAATGAGCAAGCACACAATGTTATGATGCATGTCATTAACCCAAGGCGTTATGATACCGCAACGTTTTATGTCCAACGTTTTCACTGACGCTATTCACAATGTTTGTTTTGTTTTTTGCATGCATGGACATATAATTATTATGTGACATAAACTAATGGTTTATGAATGAGTGCACGAGACCACCCAAAGTGATGCATATTACCATACCACAAATATCTTGTTGTAGTATAGCACCCCCTTCCTATAGCTG…
CLocus_33451	1	802	55	103.96	53	22627	TGCAGTTGCTCTTCAACCTTCAGCCATCGCCTGCATTGTGGGAGGCTCTATCGTCAACCAATCATTAAGGTGTTTTTGTTAAACCCACGCGAACGTGACCAAAGACATGACTGAAACAGGAACCAACATCATGTAGGCGGAGGCTAAAACAGACTTTCCTCCGTCGCAACGTCCTTCTAAGGCCCTTCTGCTAGCTTGCTAGCCCCGGCCTGCTAGCTGTCTGAATCTCCAGCCAGCCCAACCACTCACTGGACCCCTATGATCACTCGGCTACACATGTCTCTCCCTAATATCAATATGCCTTGTCCATTACTGTCCTGGTTAGTGATTATTGTCTTATTTCACTGTAGAGCCTCTAGCCCTGCTCAATATGCCTTAACCTACCATTTAGTTCCACCT…
CLocus_45012	1	803	55	103.96	141	29820	TGCAGAACGGAAAGACGGACGGTCGGGTCCTCTAGTGTTGAGAAGAGTATCATCTGTTGTTGATTCCCGAGGTGCTGACTACAAAAGTGTTCTATCATTCTGAGAGTAAGGTGAGAACAACAAATGTGGTCTAGAAAGTTGAATTACTTTGTGTGCTGGAGGCGTTTCAATTTCGAACAGTTGAATTGCTGCCTTCATCAGTCTGAAATGTACTGCGATAATCACAGGTAGAACAGCAAAACATGTTTATTTAGTCACGGGAGTTGAGTAGTTAGCATATTACACAATCAAGAAATATAGCCTACCCTCCCAGTTTGAGACACTTTGTTGCTATAACACTTTTTGATGGCGTTTCAGTTATCCAGTAGCTTACAATGACAACTCCAGAGCTCTATATAT…
CLocus_26227	1	804	55	103.96	8	17790	TGCAGATGGAATTGAGATGTAGCTAAGTACGGTGCACTATTTTGGTTTGCACGGTCCCTGATTTTTAAATAAATAAACAAACTAACCTAGTAAACTTAAAAGTAGATGTGGAAGAAGCTAAGCTCCCATTATGCTGTCAATCCATTATGTAACAAGCTCTGAAGTTTCCCTTAGGTACAGATCTAGGATCAGCTTCCCTTCCCCCAATCTTGACTTTAACCATTTAGTTGGGGGAAATACAAAACTGACCCAAGATCAGTGTAGAGGCAGTTTCACCCTATACCACGTAACAAGCCAAGATGACTGACATGGGCTAGTCTGCTAGTTCTATGGTAGTTTCAGTAGGAGAGTTGAACAAACCTTTTGAATCACAGAAAAAAGATCAACGACTGATTTGTG…
CLocus_8424	1	805	55	103.96	19	5684	TGCAGTAAATGATGTAGGCCAAATGAATATTCACAAAATTATAATATGTATGAATTTCTCTTTGATGTTTATTAAAATCAGGAGAAACATCTCTTGACCAAGGCCTACATATCAATCGAGAATATGATCAATAGTCAACTTACCCGATCTTCGAACGTTGGTCCTTTTCGCAGAAAAAGAAACGTTGATCATGCATATTGAAAAAAACAATATATAAAAAACGCTCCTCTGTTTACTGGTAAACTCCATATCTTTTTCTAAAGTTAAAAAGGTCAAATGGTCATTTTAGGCTACATGCAACAACAAAAAACTCCTTGTGCTTAATTATAAGAACTGACGAGAGACGCAACTGATCAAAGTTTCTGATGACAAAGACAACTAGTCATTCAAAGTTCCTCA…
CLocus_40414	1	806	55	103.96	131	26937	TGCAGTCAGAGGTTACATTCTAATCACAACACATTGCCTTCTCATTATCAACAGAACAGCTCAATGAATGGCCCAATGTTAGCCCAGGTGTTGAGTCATACTGCCACCCACTCATCAAAGCATTCACAGCACAGAGCTTCACGAAAACCCATCAGACCAAAACAATGGCCCAAAACAAATGCAACACAACATATGTCACTGATTTGTCTCTTACAAACAGACCATGCTAAATCTATTAAGCTTTTTCATACTTCGAAAAGTAGATCTGGAACTGAAGTAAAAGCATTTTACACTGCTGCTACTGGCCATTTATTATTTATGCATAGTCACTTTACCCATACCTACATGTACAAATTACCTCGACTACACTGTATCGCCGCACACTGACTTAAAGGTACC…
CLocus_15921	1	807	55	103.96	139	10997	TGCAGGTCACCACAAATGTAACCTTCCTTGCCTGGGAAGGAAATGAGGAATCACAAGGAGAAGTCGAGAGGAAATTGTTGAATTCATTACCGAGCACAGAAATATTCAACTATTTTTCCTCTATAGGGTTATAGGAGAAT
CLocus_88049	1	808	55	103.96	105	53393	TGCAGAACAATACAACAGGAACAACTACATGGCACAATCATTTACCAAAGAAATACTACAATCACGCCAGAATACCAATGAGTAAGCTTATTTTACTTTAACTGTACTCAACAACATTTTGTTAACTCATATATTTTCAAAGCTCTTGTTTATTAAAGTGAAAAACAAACAAATATTGTATTTTAGAGTCAGACAAGGAGAAAGGGTAATCATTTGTAATAGTAACAGGAATATCACCTAAGGCCACACAAAGTATTATTAGTAAAAAAGTATAATTATTATAATTATTATTATTATTATTATTATTAGGATATAAACATTGGAAACTCAC
CLocus_48492	1	809	57	104.25	62	31963	TGCAGCAGACCATCAACAGCCTGAGCAAGAGCCTGGAGCAGGCCGAGCAGCACATGTGGAATGAGGAGATCGCTCTGGCCAAGGCCAAGGAGACGGTAAGGAATAGGATGCTGGCCTGATACGTCTGCATTCTATACTCATCTGTCTGGTAAACAAAGGTTCAATAAGTATTTTTTTTTTTTAATGACTAGCTAGCTATGAGCCAGTGCTGAACCGTCTTCTCAGTCTTAACCACTGCTAATGATTTAGGCCGAAGTGAAGCTGGCCGAGTACCACAAGCTTGCCCGCAAACTGAAGCTCATCCCTGTGTCTGCCGAAAACGCGTGCGGCCACGACTTTGAGATCAGGCCCTCCACAGAATACGGACCGTCCACCATGGTTCAATGCAGAACACAGATT…
CLocus_13053	1	810	57	104.25	139	8889	TGCAGTCCCAGGTAACAATGGAATTTTAGGAGGAAAAGACTGAGACGGAAGCTACATACTGTAAGCCTGCGATTAAGGCCAACATGTCTTTATGTCTAGGTATGCAGGTGCGTAGGTATAAAAACGAGTACCTTTGTGGACTTGACTCTAACATGGTTGATCTCAGCAGCTAAACGTCACGCCTGTCAGTCAAACGTTGAGCAGTGACGTCCTCTTTATTGTTGCTCGAAGGTCAAAGTTGATCATCATAGCCTTGAGAAAACATCCTGTATCTTTGGTTGCGCTAGGTCCTTATGAAAACAATTTGTTGAAAGAACTGAAATAACCACGACGGCTAAATATAGATGGGGTTATTTCAAGATATTGGAGCTATGCCAGCTTATTATGATGACTAAGCAC…
CLocus_23577	1	811	57	104.25	95	16077	TGCAGACTACCAGAATTTTCAGAAGACCTAATGAATCTCTTCATATAATGCCCTTCTGAGTAAGCACCCATAGAATAAAGCTCTGATGCAAGTCCGGGGTGTGGAAGTGACCAAAATAATGGTGTCATTCCACACCACCAGACTTCCGAGGTGATTTAATTTATATTTCAGACAGCACCTTTAATAAGGCTTATTGGATGATGACACAAAAGATGCATTCGCTCTGCCATGGCTAATAATCACAATCAGACCCATTCTTCATGGTAAATTCCTTGTGATGCTGATGGTCTCATTGGTCTTTGCCTAATTATTTTCCCTGATGTGAAAGTGTGGAGAGTTAACACTTGTGTCATCAGTATGGCTCCTGAAGAGGACACATAACTTGGTACCCTTTCTGTC…
CLocus_100218	1	812	57	104.25	47	58483	TGCAGGCAGAGCTAGGCCTGTGCCACATAGTAGCTCTTGTGCTGATGTAGACAGCTTAGTGAAATGATAAACAAAAGAGCAGATTCCCTGCTCCATTACATATCACACAGTCTGGGCTTTATGCACAGACTCTGGAACAATATGACACGTTTATACTATTTAATGACTCATTTTATTATTATTATACCTAACGCAGTCATTGACAAGATAAAAAAAACAAAAAAACAAGGAACATGTGTCTTCATCTTACTATATCATTTGAGGCCATATGGCCATGGCTTAAGGCTCTACATGAGAAGCAAGCTAGGTCTCCGAGGCATATCAAAGCATCTGCTCCAATCACTGAGCTAACATCAATACACCCAACCCCCAAACATAAATGCACCCAACCCCCAAACA…
CLocus_32572	1	813	57	104.25	35	22084	TGCAGACCCATCGAACAGTTTGAAAACCCAAATAGAGAACGCTTCAGTTAGTGACTCTATCAAGTCCTGAGCATCAATATTATCTGATAATAAAACGTTATGATGCTTTATTACTTGTTATGTGCATGTAACCTTTCTAGCAGTGACGTATTAGAAGAGTTATATAATATGCTATAAACACTAATTCCATCTCACTGGATAGACTTACCACTGGCCTGGCTCTCTGTGACCCTCAGGCCCAGGAGCAGAATGCAGAAGAACAGACTTGGCATGGTGGTTAGTTAGATCCTTCCAGGTGATGCAGTCTGTGGTTCACTGCAACGGCAGTTGAGACATGGCAACGGGAGACAACAGCACTTCCCTGTCGACACACACAATAAGATAATATTAGACTAAATT…
CLocus_37256	1	814	57	104.25	15	24960	TGCAGAAGATGGCGCGGCCCTTTGGAACTGATGTGATGCTCACTGTGGTCAGTAAAGACGTCACTTAGAAGAGAAGAAAAGCTGCACTCATCCCAACAGGCAAAACTGGTTGTTAATGATGTCATTTCAACTACTTTCTGTTGTCACAACGTCACTAAACCATGTTTTGCCCGCTGGGATGGTTCCAATGGACTGAATGGAATAACCAGGTAAAGAGTTAGAGCTCATGTCAGCTTTTATAGTGAAGCACGGAACTACATGCTGTTTACTTTAGCGATAAAGCCCTCCATAATGTCCTTCATCTTCTGAATGTCCACCTCGTCCTCCCGGAAGGCGTCCGTGTACACCCTGTCTACTCGCTTGTGTTGATCCTCTAAGAATTTCTGGAAATGATCACAA…
CLocus_52377	1	815	57	104.25	354	34293	TGCAGGAATCCGTCTGCAGATCTGAGCTGAACGGCGCACTTGAGATGCATTTTTAGTCTATGAATGAGAAAGTGCACTTGTCATTTCCAAACGTTTAGCTCAGTTGTAATGCTGATTTGCGATGTATTAACAGCAAGGGTTGCATTACATAGGCGCAATGTTTTTACAACTGACGCATTTCGCGATGTCCAATTCATTGGCACACCTATAAGCATTCACTGAAAGTTGATACATAGGCTTTTCATATATTGGCTATGCGCAGCACTTCGTTTTAAGCATCAAATGATCGAATCAGTTACTGTTTTCTTGCTGAAACCGCGAGAAACACTTGAGAGAAATGTAAAGCTCAGACAATTCTCTCAAAGCACATGGATGTCGATTTGCACGGGACTAGTATTA…
CLocus_92494	1	816	57	104.25	91	55306	TGCAGTGTGGAAAGAACATTAGCCATTGATGGAATTCATGGGATACTTGTGGGGAGCACTGCATGAAGTACAAATGAGCATTGACTGGGTGCAGTCCTATGACTCACATGCCCCAGGCCCTACATAGTAGCTACAGACAATATGGAATAAATCAACTCCACCGTGGAGCTCTATGGTGGCCAAATGTGTTCTACAAAAGCATCATCCTTCAAAACAGTTTTATTCACGTTTTTTTCTGAACACGTTGAAATAGAAACAGCAAAAAAAAAAAAATCCTTTAAACTGATATATTAGAGAACTTAAATGACAAAACAATTAGGATTCTTCAATGTTAGGATGGCATAATTTCATTGTTCACATCATCAAGGTGGATAGATTGCTATTTTGGATGGTTCAGCA…
CLocus_17203	1	817	57.28	104.25	15	11833	TGCAGTGGTCTAAAGGGATAGATCCATTCTATTAATTATATTTCTATGGATTGAAATGACACCCACCCTGTATTCAAGAGCATGTTGTGTCTCAACCAATGATGTATATAAACACTGAATTGCTGATGCTATGTATTGGCCATTGAGAGGCTTTCAAGCTACCAGTTGGCACTCCAATGAATTCTACAGTATTTCAGTATTAAGGATAAAATGATATTACATTTTTTTTTTTTTTTGGTGGAGTGGGGACAGTAACATTACTAATCTCAAAATATATATACTTTAAGGAAATTGTTTACAAAATTTTTCATTTTTATGTTTAGCTAACATAATGTCATTTTAAAGTATGTATTAAGGTGTCTGTAATAGAATACATGAGGCAAAAACAAATGCATTTCT…
CLocus_93905	1	818	57.28	104.25	42	55946	TGCAGTGGGCTAAATCAGGGTCACACAGAGTGTTTCTTGGTAGTCTTAAACACATCTACTTTGAAACAAAAGTATACACCTCACACACGTTGGTTATGGGCTTAGAAAAACAAGACACCTGCACCATGTCAGATACTCACAGTGCTTGGAGGGGAAACATTCAATGTGCCAGTGGATGAACGGACACATGAGACGTGGCTTCAGTTCATGTCAGGAGAGAGTTGACAGTGGTAGTGGAGTGGTCATCACCTCTTAATCAGGGAACAGGAGGGGACTTAGCTGTAAATACAAATAGCAGATACATTCCATTACAGCTGCGCCATCGTAGGTTTGAACAACAAGTTTTTCCATTAAGTTAAACTCAGACATCTCAAAATTCACAAAGTCAAACACAGACTG…
CLocus_28632	1	819	58.13	104.25	141	19481	TGCAGGCACCTTACTGCAGCCAAGCAATGTCCTCAAAATGACTTTTCATTATCTCCGGTCTCTCCATTCTGTGATTCAGAGTTGAAATAAGTGTGCGTATAATTCAAAAGTTCACATGAATTATCCATTGATGTCAAAGGTAGACTTTGTTTCA
CLocus_7984	1	820	58.13	104.25	119	5373	TGCAGGAAAAATACCTTCAACTAGAGGACAGACACAAACTGGGAGAGAAGGACAGACTACTAGAAGAGAAAGATAAACAGCTGGAAGAGAGAGATAAAGTACTGGAGGGAAAAGAAAACGAACTAAAAGAGAGGAGACAGGAACTAGAAAAGAAAGATAACCTACTAGAGGAGAGAGAGAAGCAGTTAAAGGAAAGAGACAAACAGCTGGAGGATGTCAACAATGAAAATGCTAAACTGAGTAAGATTATTCCAACCATTAATACATTTAGTCTTCTGTACTTTCCTCAATTCTCAGGTTATTGTCGACTCTCCACTGAGTTGTGAATATTGTTGTCCATCACTTCATACTTTCCCTCTGCATCATATTTCTGTCTAAAGTCTTTAACACAGAATTCAG…
CLocus_4791	1	821	58.13	104.25	21	3427	TGCAGAAGCTGCAGAGTTATTGCAGTAACCTGGAGTCTTTCAAAGCCAACCTGGAGAACAAAGCCTCTGGAATGGCCGAGAAGCTGGAAGCATCTTTCAAAGCCAACCTAGAGAACAAAGCCTCTGGATTGGTCGAGGAGCTGGAAGCATCGGGTAAAAAACCATGACCAAACATTGCTACTCTCGTGGCTTGGCTGGTCTTGCGGTATTGATGCAGCCTCCAGGACACTTCTCTTTCTACAGTGTCTGTATATGTGGTCTACTACCCTTTGACACATAATTTCTCTATCTGTCCCCACTTCATCCTCTCATTCTATCTGTTTAAATGAAATATGAAAATCCATTAAAATATATGTTTTAAAAATTGCTACTCTCCTGGAAATCCTGAAACGTTAACAA…
CLocus_15522	1	822	58.13	104.25	268	10704	TGCAGCTTGATTTGTAAAGAGCACGGTTGCTTCACCATAGACTGCATCTGCTTTAAGAAGAGTGAAATGTTAACCTAATAGTCTCTATTTAAATTGACAAGAAAATATGTTATGATGCTCCTAATATAAACCTCTACCTACAATATTGACCAACGTTTTTATTTGCTAATAATGAATTATTGATCTCTTTACATTTTCTTAAACAAAATACTCTGCTACCACTCTGTCGTAGAATGATTGTTTGTTTGTTGACTTTTGCAGAATGAGCTGTTTTTGACATTACATAAACTTTCAATAATGCATGCAGGCAATGAGGTGCTCCGTGCCTAGTGTGATTCTGAAATGACGTCCTATTCCCCTATGAGCCCTGTTTTAAAGTAGTGCACTGTACAGGGAATA…
CLocus_32435	1	823	58.69	104.25	11	22010	TGCAGAGCAAAGTCTTTAAACACTCTTTTGAATGTAATGTTTTTGCCAGTCCGCCCAGTGGCCCCTGTGAATTTGACCACCCCAGAGGTCTATAGCTGGAATGCCAGTGTGGGTTGGCTCACCTCCCTGGAAGTATTCTAAAATGGTTCCCTAACGAGAGGCTGTCCCTTATCTGCCAGGTGCAACGGACCAGCCACTTGAACAGCAGCACGGTGAGTGGACTTAAAGGGGATAATTTATCCAATACAGTATACATGTTTGGGTTACATTAAAGGACACGTTTGTTTGTTTCTTTTTTTGCGATTTTCACTTGGTTTTGAGAAACTTACCCAATCAGTTAAGTGAAATCGCAAAACAGGTGTCCGTCTGGGCACTTTTATAACATGCCATTTACATCAA…
CLocus_93332	1	824	58.69	104.25	73	55687	TGCAGCATACTTAGGCAGGCGAGCTAAATAGGATGACTGAAGACAGTACAGTATGGGGAGAACAGAGATAATGTTGTCTGGCTGACTGCTGCTGCCTGAGCAGAGATGAGAGGATGACTTTCAACAAAACAAAAAAAGTCATCATATAAGTAATATACGAAGCTGAAATATTTTATAGTAACTTCCTATTTGTTCACCCAATATGGACCTTTTTATTTATTTAACTTGGCAAGTTAGGTAAGAACAAATTCTTATTTTCAAAGACGGCCTAAGAACAGTGGGTTAACTGCCTTGTTCAGGGGCAGAACAACAGATTTTCACCTTGTCAGCTCGGGGATTTGATCTTGCAACCTTCCGGTTGCCTTATCTATTACATCCAACGCTCTAACCACGAGGCTA…
CLocus_3433	1	825	58.97	104.53	244	2567	TGCAGGTAGCACCAGCATGCCTCCTCCCAAATATACAAAAGGGCCTCCTTCTTGGACACAGATTGCCTTGGCCAAGACTGAGATTCTCCATTTCTAATGCTTTTCAGTCCAGGGGTGTATTCACTAGGAAGTAAACGGAAGCAAACAAGACGTGGAGGGACCTACCTACATTTGTCCAGTAATAAATGATTGATTTAATTGAAAAAGTTTTCAATTTTCAAAGTGCTTTGCTACAGAGTGCACCAATGAATACAGCCCAGGAGTAGACTCAGTCCTCGTCTGGGAAACTGTCCCTTGGTGTATGTATCTCTACACTGGGAGATAGTTCATTCTATGCGTGTATATTTCTAGTCGAGTTTTAAATCTTTGAACCTGTTCTGAGTGATTGTGGTTTGTGAT…
CLocus_7296	1	826	58.97	104.53	20	4936	TGCAGATGAAACTCGTTTGCTATGATGTGTTCGATAAGCTATGTAAAGAATGTGTGCGCGCGTCTGAGTGTGTGGCTATAAGTGTAGAGTGGGGCGGAGCTAAACTAATACATCCTGCTCCGAGGTATGTGCAGCAGCGTGAGCCCGCCGGAGGAAGTTCGTAGAACATGCCCATATTTAGTTATGACGGTTCCCGGTTTCCTCTGTCGAGCTAATTCACTTTGACATGCCACATATCGTCACCATTTTGCCAACTGACATTTCAACTCCACCAAACATTTAATTATATGTGTTCTCTTTTCACAGGATCCAACAAGAGTGTTTTTTTTATTTTTTATTTTTTTTAAATACAGCTTACGTTCGAAGGCATGGGCAACTATTATTTAACGCGTGACAAGG…
CLocus_105725	1	827	58.97	104.53	178	60634	TGCAGGAAAAAGACCTTCAACTAGAGGACAGCAACCACAGACTGGGAGAGAAGGACAGACTACTGGAAGAGAGAGACAAACAACTGGAAGATGGGGACAAACAGCTGGAAGAGAGAGACAAACTCCTGGAAGAGAGAGACAAAGTACTGGAGGGAAAAGAAAATGAACTAAAAGAGAGGAGGCAGGAAGTAGAAGAGAAAGATAACCTACTAGAGGAGAGAGAGAAGCAGTTAAAGGAAAGAGACAAACAGGTGGAGGATGTCAACAATGAAAATGCTGATCTGGGTAAGATTATTCACACCATTAATACATTTAGTCTTCTGTACTTTCCTCAATTCTCAGGTTATTGTCGACTCTCCACTGAGTTGTGAATATTGTTTACATCACTTCATACTTTCC…
CLocus_48004	1	828	58.97	104.53	107	31669	TGCAGATTTTGTTTAAAAAAAAAAGAGATTGCTTGTGAATACGACAGATGTCATTCCATTGTAGCTGAGTAGTTTTCTAATGCTGCTGTCAGTTACTGAGAATAGGATTGATCACGTATTGTCAGAGGACATGTTGAATCACTGGTGTCAATGATCACTTTTGTAAGATTTGTTCCCCATTATTGAAGATGTTATTATCTCAGGACTACCAAGAGCCTAGTGTCAGTGTTCCTAACATTTAATAAAGCTGCTGATCCACAGTGTGGATGGTTGTATATAACATAATTGAGGTTACACTCACATGGACTCTGACAGGCTTTACATGCTACCCTTCTTATAGTCGTAAAAAAGATTATGGAGCAGATACAAGCATGGCATTTGGTACAAACATTCCTCAGG…
CLocus_23805	1	829	58.97	104.53	92	16205	TGCAGGACTCGCAACTCCACAGCAAGTGAGGCTGGATGCAGACAAGGAAACACAAAAGCTGTCGGTCACATGGGAGGACAGCCACGCCTCTGCCTTTGACGTGGAGATTCTACGCACTGAACTCATGGAGATTGTGTTGAATGTAAGTGAAGTATTATGTTTGATCAAGACTGTGTTTAAATTTAAAAAGTATATTGTAACAGATCCTTACGTTTTCTTAGCGTCGGTAGGCTACATGTTCACTTGTAGTGTCTTGCTCTTCAGTCGTGTCTCTTGACTGGAGCACGTGCTATTGTCACGGGTGGGATCTGAACCCTGGTCTCCCGCTCAGGAAACCAACGTCTTAACAATTCGACTATTTGTTTTTGGTAGGAGACAGTGGGTGTAACAGAAGACCAG…
CLocus_73428	1	830	58.97	104.81	14	46043	TGCAGCGGGGGGACACCTGTAGTGACAGTAATGTACATTAGATGGAGCAGAATGGTTGAATGGTACTGGGCAGAGGCCTCGGGTGGTGTTCCTTTACAGAACTCTCTTGACATGGCCACCCACCAACCTCCTCCACTCCACTACCAACCTCACTGGTTATTACATATCCTTTTATATAAGTTACAAGAAGTTGGTTATGATTAGAGCAAGATATAAAGACTCACACACTGGTTCAATCAAAAGGCCACCATGACTCTCAGTGTGTGGAAAAAAAATTGCATTTATTCAAGGTTTTCAATACATCTGTTTGTCAGTGCCTCTGTCACAGCACAAACAGATGGGATAAGTCTGTAAGAGGGTTGAAATACATTGCAAGATGTTATCATAGAGACCTTTGAT…
CLocus_48755	1	831	58.97	104.81	78	32130	TGCAGCGGGGGCCAATCAACAGTCAGCAGCAGCGTGTCAACAGGAGCCAATCAAACAATCCTTCACCGGCCCGACGACCAATCAAAAGCGTGCACACGTCTGCACTGAACATCTCAACACATTTGAACCCTGAACTGGGCGTCACAGAATCTCTGCCCGATTCAAGATCATAGTAAATAAAATAAAAAGTAGCCTAGTTTGAGTCAGAACGGCCCATAGGGCAGGAGACAATATTCTGTAAAGCATCCGCATACCTAGGTTCAGTTTGCTCCTAGCAGAACTGGGCTAGGCGAAGTGCAAGTCTTGTGTTTACGCCGCTGCTACTCTCTGTTATTATCTATGCATAGTCACTTTTAATAACTCTACCTACATGTACATATTACCTCAATTACCTCGACT…
CLocus_42087	1	832	59.25	104.81	96	27961	TGCAGTAAGGTGCCTGCAGCTGGATAAAAAAACAGGGTGTATTCAGTGAGGTGAAATGTTCTGAATACAGCTGATAGAAATGTATTGACTAGAGCCGACACAATTCCCTATTCTACCTGACAGACAGTCATATCTGTTCTACACAATAATCCATGAGCTC
CLocus_21751	1	833	59.25	104.81	39	14995	TGCAGCACCTTACATATTCAAACGCAGAGAAAGACTTATCAGTTAAAATGCATCAAGCAATCCGCCCCCATTTCATGATATGTAATAAAGGAGATGTGCTATTGATAAGCAGCTCTGTCAAACAGACTGCATCCCACTCTTAGAGGTAATTGCGGGCGGTTGTCACTATATTTTGATGATGTCCATCATCTCGAGATGGGAAACACTACCCACTGGGCACAGACGTCAGTTCAACGTCTAGTTTAGATTTACATTTGGTTGAGTTGTCAACTAACATTAAATGAAATAATAAAAAAATCTATGTCACAATGTCATTGGATTTAGGTTAAAAGGGAGGAAATAAAATATTAAATTCCCTGACGTTGATGACGTGGAAACGACGTTGATTCAACCAGTATT…
CLocus_21895	1	834	59.53	104.81	152	15106	TGCAGGTCTTACCCCACCCTCTCAACTGCTGGTCTTAATCCTCTCTCTAGGTTGGACAGTGTTTATTAATGTTTATTCATAAAAGTTATTACAAAGTTGTTACTTTCCCAGGTCCTGGACGCCATTGAGCCGGTGATGAGAACCGTCCGTATGGCAGTGAACGGACCGTCTACCGAGCCAAGTTCAGCTCCATCACCGACACGGACATCTGGGCGGCCATGAACAAGCTGGGAGAGCCCAACCGTAACGAGGCTCTGTCCGTAGACGCCCGGCAGGAGCTGGACCTGCGCATTGGCTGTGCATTCACCCGGTACACTACACGACCCTACAACACACCCCATTCCAACATGACATATATACAGTGAGAGATGGCCTTCACCTGGTACACTACCATACACA…
CLocus_107426	1	835	59.53	104.81	107	61354	TGCAGCTTAACTAGGTCTTTCCCTTTCAGCGCTGGACCACACGACCGGGACAATAATCAAGATTAGACAAAACTAAAGCCTTTTTTGTTGTTGTAGTATTGGTGACCAGTACTACAAGTTAATTCTCCTCTCGCCTATTGAAATAAACCTCTCTTTTACACCGTGCCGCTGTTGCTGCCAGCATTTAAACCATCTACAGATGGGAAGGGCTCATCAGGATGATTGACTGAACTCAACTCATTTGATTCGACTATCACAGGAGGCTGGTGAGGGGAGGTCAGCTCATGATAACGGAGTAAATGAAATGGTATCTAAGCACATGGAAACCATGCGTGTCATATATTTGATACCATTCCACCATTTACACCGTTCCAGCCTCATTACTATGAGCTGTACTCC…
CLocus_30373	1	836	59.53	104.81	33	20697	TGCAGTGTGAACAAGGCTTTAGTGACCTGTGACGTGAGGCATACTGGGGTATTATGGGATGTCTTTAGGCTTCCTTGTCAGTTGCTATTGAAACAGCTTGTATGATGGATGGGAACTTACTGAGTAAAGACTTGGTCACT
CLocus_18342	1	837	59.53	104.81	25	12639	TGCAGCGTAAATTCTCCTAACCTGCTATGGAAAAAGTCATAGCTGCATGGAAGTGTTGTGTTTTAAGGGCATCTTGTAAGTTTTCAGTAGGCTATTAAACATCCTATTAGCTATGGAAGTAAACATTGTACTTTACTGATATGAAGCCTACTTACCTTTTGGCCAACTCTGTCGCTTCTTTCGCCGAGGAGGCGTTAACCAGAAGGGACACATTAGAAATTCCCCCGGCTTGGAAACAATCCACTATCCCCTGGTTCCTTTTTGGACAGTACCCAAAATCATCTCCGGTCACCACCAGCTTGACTTTGGGTTGAGGCATTATCGCTGGACGCTGATGGAAAAAGTGACACAGCACAGGAGATGCACTGGTTGAATCAACGTTGTTCACACGTCATTTCA…
CLocus_34129	1	838	59.53	104.81	177	23048	TGCAGCCAGTCCCTGCAGCTATATCCGTGGGTGGCAGGTTTAGGGTCATGAAATATTATTGTTGAGTCATTTTAACAAATTTCTACTTCCTTTACAACCAGTCAAACTGATGTCATTTGGATATTTTGCACAGAAAATCTTTCGAGGTATTATTTTTGTTATTGCATTTTCTCCCCAGTCCCTAAACATCTTAGCTTCGCAAAAGAAGCAGAGATGACAGAGAACTTTACCAATGTCAACTACACTAAACGAAAATATAAACGCAACATGTAAGTGTTGGTCCCATGTTCCATGAGCTGAAATAAAAGATCCCAGAAATGTTCCATACGCACAAAAAGCTTGTTTCTATACCAAGATAATCCATCCACTTGACCGGTGTGGCATATCAAGAAGCTGATT…
CLocus_82311	1	839	59.53	104.81	216	50433	TGCAGGATGGAAAGCCAGTGACGGCTGACAACAGTGTGTGATAGGAGGTCGATGCAAACTCATTAAGTAAGAATGGGTAATGCAAGCCATCGCTCTGAGCTGCTGTCTTCCGCTCTCTCTCTCCCTCTCTCTCTCCGTCTCCCTTTCTCTCCCTCTCTATGTATCCTTCTCTCTCGCTCCCCTATCGCTCTCTCTCTCTCTCTCTCTCTCTCCCTTTTTCTTTGTATCTCCTCTCACTCTCTAGCCCAGAGGGCTGTAGTTAATGACTCTGAGAAATTAGACTTCTGAAGCGAGAGATGGAAAACAAACAAAGTTAATACAGGAAGGAGCTGCTGATGTTTTATGTATAAGGATGGAGGAGAGGGAGGGGGTTGGAGACGGGGGTTGGAGAGGGAGGGG…
CLocus_34459	1	840	59.53	104.81	85	23262	TGCAGTCATTTCCCGACACTGTCTGGGAATGTGCCAAACTCTGCTCGCAGTGGACGTCCTTCTGCTTCAGCTTATTATATCTAACAGTGTGAAATCCTGGAGTCTGGGGAATTACCCAAATCATTTCAGTAGTAGAGAAACCACTTCCACTTCCAAGAAACACTCAGGAGAAAATGAAACCTAACTCTGTTTGAGAGTAACTTGCGGGTTTATTGACTCTCATAACACTTAAAGGGGGAATTTACAATTCTAAAAATCAACAAAGCGTTCACCGTTCCTCTTAATTTAGCACAAACAGCTGAGGGATGGTATTTTATACAGAGCTCTGGATGGAAGGACTGACCATCCATGAGATCAAAATTATAGTTGTAACCATGTTTTAAAGCTATACAGGGTTTG…
CLocus_56818	1	841	59.53	104.81	56	36943	TGCAGATTCCTGATTTTCATCATCTTGTTAACGCTATGGGTACGTTCCTCTGCCCGTGCGTTGCTGACGCATGCCAGATCTTACAACGCTTGGATACGTATTTTACGTATCGGCTAACCACATCATCCGTATGTTATAGCAATCTGTCAGTCGATGAAATAGTCACGGACGTGGCACGCAACCATTGGTTGATGCATGCAATGTCTGAGCAGGGGAACACTACCAATGATTACCAATGATGGACTGTCAAACCTGACTCTGATTGGACAAGCCCAATAACATCCTCTGGCTCCTCCCTTCACATCCTGTTGTTTTGATGGATGGGATGAACTGACCTATCACTGCAAGTGTCAGGAAAGAAAAGGGTAGAGCCGGGCCTAGTGCATGTAACCTAGCAAC…
CLocus_86787	1	842	59.53	104.81	16	52749	TGCAGCAAAATGTTGGTAGGACTGTCTGGGAGTGGTCTGAGTGGGGAGGGGAAAACTGACAACTAGCTGTTATTGGCAGAGAGGTTTGGAACACTCGTTCTTATTGGTCTATTAACTAATTTACCACATGATGATGTCACCATGGAAGGCCAAGAGCACCATCCCACCAATACAGTATTTTCAAACAGCTCTTAAAAAAAGGGAATTATCATCATTTTCACAATTTCACAGTATTTTTCCAACCTCATAGTGCGGAAATATATATAAAACACAGAAAAAAATCAAGTTTGTGACTGCACTGGGCCTTTAAGTTAAGCTGCACCCTGAGGTTGTCTGTTCCACCAGGGAATAGGAAAGGAAGTGCACTTTGGGAGACACACTGAACTAAACTTTACCTGC…
CLocus_96750	1	843	59.53	104.81	19	57121	TGCAGTAAGGAATGATAGAAGAGACAGGTTACAAGGAGGTACAGAGAGTCAGGAATGAGAGGGGAGACAGGTTACAAGGAGGTACAGAGAGTCAGGAATGAGAGGGGAGACAGGTTACAAGGAGGTATGGAGAGTCAGGA
CLocus_56605	1	844	60.1	104.81	172	36865	TGCAGAGTGACGTTTCCACAACTTAGTGACAGGCCTCCTCGGCAATATGTTTAACCCTGAATAATTCACCCTCCTAAATTTCCCCGTCTTTAAGGAAACGTTGGAAAAGCCATTACTGACTTCGGAGTCAGCTGGTCCAGCTGTATCGCATCACTAACGCTTAGCGTCACGTCGGACGACGAGGCGCTCTGACAGAAGCCGCTAGACAAGGAGATCACTAGAGGGAAAGACAAGTTTTCACATCCCAGGTCAGAGATCTCCAATGACCAGATCTGGGTTCAAATACTACTTGAAATCTTTCAAATACTTTGAGTGTTTACTTTAGCCTGCCTGGAGTGCCAGATGGGCGGGGTTTACCATTTTGGGACTATTCTATTGGTCCATTAAGACAGGCAAGCT…
CLocus_4471	1	845	60.1	104.81	32	3229	TGCAGGCACCTTACTGCAGCGATATCATAAACGTGTCATCACTCATCAGATTCATCATACATAGCCTTACGCATGTTGAATAAAAAGGTTTTCTGTTGTGTATAATATAATAATAGTATTATACATTTTTTAAACATGTTTTTTCTCTTATCATGAGAGTGGCATATAAACAGCCTTCACTGAAGACCACCAATAGGATCACGATACGATAAACAATAGTAACAAATTGTTTGCTTTGTGATGTAATGCCAGTTGGCTCCAGTTGATATTTTCTCTTTCCCATCACTTAGCATTCCTCGGCTGGGACTAGCCCGAGCATGATGAGCAGCAGATGAGCATGATGAGCAGCAGATGACTGTAAGTGTACCAGTAAAAAAACAGACATAAACAATGATAGAA…
CLocus_5122	1	846	60.1	104.81	112	3614	TGCAGCCGCTCTCTGTCCCTCCCTTGTGTCCTTTCAGACGCCAAAACCCAGAGCTGTCTTGATAATTCCTTGATCAGGTCTGTGGCAAGGTGCGACCATTAGTTATCAAAGTCTAAGGAGGGAGTCCCTGGCCAACCGGTGCTAGGCAGGGGAGAGAGGGAGGAGGGCAGGCAGCCGGACTGAAGCAAATTGGGCCACCACGGTGCACAGAGGAGAGGAGTGGAGCAAAGAGGGGAGGTAGGGGATGGAAGGAGAGGAGGAGGAAGGGAGGACGAGAGGGGGCGGTGGTATTTGATGGTGGACAGGAAGCCCCCGGGGTCATGAATGTTTTAGCAGGCTGATCGGCAGCGTCGGGTTACAAGGACTCCTACAGGTGTAAGGAAGCAGGTTGTCTGTTCA…
CLocus_141719	1	847	60.1	104.81	130	71294	TGCAGGTTCTTTCTCAGTGCCTCTAGTTGAATGTCTCTATCATTTAGTTGCTTGTCTTTCTCTTCCAGTTGGTTTTCTTTCTCTTCTAATAGTTTCTCCCTCTGTCCCATTATCTGGTTCTTCTCCTCCAGGAGTCTCTCTTTCTCTCTCACTTCCTGGGTCATATCATCCAGTTGTGTGTCTTTCTCCTCTAGTTGGTTCATCATCTCCTGTCTTAATTTCTCTTTTAATTCTTTATCCATCTTCAACTCTGAGAGAGAGTAATTAACATATTTAATTGGTTGTTTGAATAAGTAATGTATTAATTCATTCAATAGTTTGCCTATAAAGACATT
CLocus_31179	1	848	60.1	104.81	160	21214	TGCAGTGACCCAGAGGAGTAAGAGGAGAGAGGGGGACGTGTGTGGGAGACGGCTGGTGCTGGTGGACACTCCAGACTGGTTCTGTCCTGGACTCTCTCTGGAGGAGATGAGACAGGATGTGGGGCTCTGTGTCCGTCTGCTTCTGCCCCGGGACCCCACGCCTTCCTCCTGGTCATACCAGTGGAGCCCTCTAAGGGGGAGGAGAGAGGGGTGCTGGAGAGAATAGAGGAGATGTTTGGGGAGGGTTGTTGGGAACACACTGTGATTCTCTTCACCCATGATGATGTCCTGAAAGAGCAGAGCATTGAGGAGTTTCTCCAAGCAGGAAGTCAGGACCTCCAGCAGCTTGTAGAGAAAAGTGGGAGCAGGTACCACGTCCTCAACATTAAGGACAGGGCC…
CLocus_24877	1	849	60.38	104.81	121	16920	TGCAGGATGAGTGGCAGGAATGGGCAGGTGTATGTACATACATGAATGGAGAAATGAAAGCAGCCTTATACAGACATAGTGAAACCCAGCTATAAAACTGGGATATATAGCTCTATATAACGCTCTATAGGCAGAAAAGT
CLocus_18921	1	850	60.38	104.81	137	13025	TGCAGTCCCTGCCAGGATATACTGTAGATGGGAAAGGGAAGAGTGACACCACTCGCAGCAACAGATAACGAGTGAAGTCTCCGGTCTGCAGTGAATATGTTTAGATTCAGGATCTAGACGTGAAGCAGAAAGTTTTTGGTAAGAATGACGCTACGCAAAGGTATTCAGGTATAGATTACGAGTGAAATCTCCATGATAGTATGATCTGTCTATTTCAAATCTAGAAACAATGGACATAGCACAAAGTTGGAGCTTACATTATCAGTGGCCCGAAGAGGCAAACACGAAGTGTGGTGTGTAGCAACACAGCCTACCACTAGAGGGCGCCATACTCACAACTACATATGACACCTCCCAGTTCAGCTTCCATATCTAACTTTTTTTTTTAAATAACACAAA…
CLocus_42168	1	851	60.38	104.81	165	28038	TGCAGGAGGAGCAGGCAAAAACTCAAAAACTGAGGTCTGTGGGGATGAGAAAAAGCTGCCAGTAGATGTTGGTCTGCTTGGGACAGCAGAGGCACCAAACATGGACATGAAGCCACCAAATCCAGATGGCCCAGGGGCCCTCTTATGTGGTATTGGGCCACCCACTCTTGGGCCAGGACGTCTAGGACCTCCTATACAGGGTCCTCACATTCTTGGACCTGCCATTCTTTGACCGGGTGGGCCAGGTGGTCTTGCCATGCCTGGTCTGGGCTGCTGTTGTTGATGCATCTGACCAGGAAGATACTGCTGCCCCATTGGAGGTGGAGGACTAGGCCCTGTCACCTGAGGTTGCTCTGTTACTGAAGGCTGGATTATTTCAGCTGGTCTCTCCTCAGTCAG…
CLocus_55917	1	852	60.94	104.81	28	36437	TGCAGAAATCGAATTAGCATAAATAAATAGTTTCCTTGAAAATCTGTTTTTTTTAAGCCGCTAGAGTCGATTGATGTGCTGGTGGTTTTGTATCCGCCGGGGGGAAAAAAAGAGAGTTTAGAATGTGTCAACAAATAAGAATGATTATTTCCTGGTCTTTCTTATGTCTCTCAGACTCAGGAAAGACACTTCAAAACAAACTTCCTTGTGATTTATTTTTTGACTCTCTTTTTCCATGTCTGAATCTGATATTCAATGTGTTTCTGTGGGCTAATAGCAATACGGCCATGTTTCATTGAAATAATTAAAACGGATGTATTTATTTATACCTAAAATTACAAATCAAATAGCTAAATAATTCACGGTATGACTATTTTAAAAACAAGTCCATATGTTAGC…
CLocus_9675	1	853	62.07	104.81	253	6552	TGCAGTAAATGAATAATGATTTTGTCAATCATTGTTAAATGATATACACATATTGTTCCTTGCTGCCCACCCCAAGTCTGTGTGTTTAAGAAAGCCAGCCTGGCAAAGGGGATCCTATTGTATCAGCTGATGAATGGGTAGCTGGTGAAATCTAACAGGAGCTTGCTTGACACTCTGCTTCTGTTTGGGACTGACCCACATCCCCTGGCCCTGTGTTAGGACGCTACTAACTGCTCTGATTACTGCTCCCCGGGCTGTGTCCCAAAATGGCTCCCTATTCCCTATACTGTAGAGTGCACTCCTTTTGATCAGGGCCCATAAAGGCTGTGGTCTAAATCAAATCAAATCAAATGTATTTATATAGCCCTTCTTACATCAGCTGATATCTCAAAGTGCTGT…
CLocus_62026	1	854	64.08	104.81	217	40055	TGCAGGAAAAAGACCTTCAACTAGAGGACAGACACAAACTGGGAGAGAAGGACAGACTACTGGAAGAGAGAGACAAACTACTAGAAGAGAGAGACAAACTACTGGAAGAGAGAGACAAAGTTCTGGAGGGAAAAGAACATGAACTAAAAGAGATGAGGCAGGAAGTAGAAGAGAAAGATAACCTACTAGAGGAGAGAGAGAAGCAGTTAAAGGAAAGAGACAAACAGCTGGAGGATGTCAACAATGAAAATGCTGAACTGGGTAAGATTATTCACACCATTAATACATTTAGTCTTCTGTACTTTCCTCAATTCTCAGGTTATTGTCGACTCTCCACTGAGTTGTGAATATTGTTTTACATCACTTCATACTTTCCCTCTGCATCACATTTCTGTCTAA…
CLocus_8730	1	855	64.36	104.81	213	5900	TGCAGTTATAAATCTATATCTGTTGCTGTAATGCCTTTTCCTTATCACTTGGCTACTGGTACTGATATCTCAACTTGTTTTTGACACACCTTGCAGTCATAAAGCTACTGTAATCTCCTGTATAATGTGGAGTGTCTGCTTAAAGCCTTGCCCCTAGTGTTGATAAAAGTGATTTTTAAACCTCTTGGGCTCTGTTTGTCCCTCCTAGGGATCCATTACCAGATGAAGATGCATGTGTTCAACAGAAAGCAGGCTGATAACGCTGACCCGACCTTCTACGTGAAACTGTATGGCGCTCACAACGACAGCCAAGACCTGCATGTAGACATGTGAGTACATGGTATTACTAGACTGTATACTAGATGTAACCCAAGATGAACAAAACTTGAGTAGTACTAT…
CLocus_53951	1	856	64.36	104.81	110	35336	TGCAGAAACAAAATAGCTGCAAGTCAAATACTTTTCGAAGGCGATTTGATGAAGATGGAAAAAATAGTCAGCAGCTCTTGAATGACCATAAAAGCAGACTTCAAAAACACATTTTTTCCAGTTGTCAACCGGTAGATGAT
CLocus_59891	1	857	64.64	104.81	104	38770	TGCAGAAACGTAATTTTCGATTTCGACCAGAGAAGTCAATAGCCCATTTAATGTCCAATGAAAGCCTGTTGAACGTTGGCACATTTCAAATCTACCAGTCTGTGTGCAAGGTAGAGGGACTTGATATGGTTCATCTGGTTA
CLocus_75358	1	858	65.2	104.81	180	47061	TGCAGCTGTTTCCTGCCCCACTATGCTATGCCTCCCATCCTGCCTGCTCTCCCTCTCTCTCCCTCTTGTCTTTCCCCCTCCCCTGGTTTCAGTCAGTCAGAGTAAAGTGCACATCATTGCCAGCTAAGAGCTCTGGGTAGCTCTGGGCACCGTCCCTGGTCGTCCCAGAGAAACACCAGTGGTTCTGGCGTGGGCAGGCCTCACAGACAGGAGCAGAAAGGCACAGATGGCACTAATGGAGGAGAGGAATCCAACTGGGGGACCGGGACTGAGCCACACCGCCTCGGCCAAATAGCTCTAGTGGTTATGTGTCTGTCTGTATGTATGTCTCTACGCTCAGCCCAACCCAACCCGGCTCCCAGCTCTACCAAGGTTAATTCCAATCCACAGCACTCCAGC…
CLocus_113255	1	859	66.62	104.81	54	63681	TGCAGGTCATCCTATTTCGAGATGAAGCCTTCTTACTAGTGCACAGCGATCCCAGCTGTCACCCGCTACACACAGGGAGGAGCTATACGCCCTAGACTGGAGTGTGCTAGTGAAACGAGATCTTTTGTTTCATGGGTGCCACTTTATGGACGACTGTATTTTTAGAATTTACATTGGTATTCAACGAAAATACACAATTCCAAAAATAAACCACTATAGGCTAAATGGCAAAATATAATGATTGTGTAGGCTGTATTATTAGTTTAAAAGAGAAACAACAACATTACAACAAACTGTATTTATTCCATATGGAAAAGTGAACCCTTTCTGGCTCGCACACAAAGTGTCAGAAACAATATTGGGGTGACAATGATGATGCCCACAGTTACGCATTGGTAC…
CLocus_113128	1	860	66.9	104.81	57	63609	TGCAGAACAGAACAGCTCTCTCTCTCTCCTATCTTTCTCTCACTCCCGTTCTCTCTTTCTCCTTTCTTTATCTCTCTCTCTTTCTGTTCTCTCTCTCCTATCTTTCTCTCACTCCTGTTCTCTCTCTCTGTGTTCTCTCT
CLocus_73040	1	861	66.9	104.81	22	45844	TGCAGTATTTGTCTGTTTGCATTTGAGTGTATGTTATTTTGGTATGTGTTTGCGTGTGTGCACATCATTTGTGTAGTATGACCAAGTGTGAGCGTGCCTTTTTGGGTAGAGCGAGCTGAGTGCGATTTAACATGAATACACTGTGTAACTGAAGGATGTGACTGGCTACATGGACATGATCTTTCATTGTATTGTGACTTCTGTGTACCATAGTAGTTTGTGTATATAATGTAACTAACTTTTTTTTTTTTTTTTCAAAATAAATTAAATTCACTTATTTTTAATTCTGTTTTGACCTTTTCTCTTCGGCTGGATGGCCGTAACAAGGTGTGGTCTGAAAGTTTGGCTCTTAAGTATAAAATAGGTGAGTCAAAGTATAGAATACTTGAAATTACAAGG…
CLocus_80647	1	862	66.9	104.81	116	49538	TGCAGTAAGACCAAGAGCGATATGGTCCTTTTAAGATGGAAAGACAGTATTTCAACAACTAAGCTGGTTCACACTACACAACCAGGTGTTCGATGGGCTAAACGCTTGGCATGTCCGACGCTCTCTATCTCCTTCTTGGATCAGCTTGTTCTTTACCTCCCCGATGGGCCTGGGCTTGTCCGCTAGATCAGTCCTTTTTAGTCCACCTGTGGTTGTAATTTTGGTTTTCAGGAAAGTGATTGAGTGATACTCAAAGAGGGGCTCTGGGGGTGGGTGGTGGGGTACTACATAAACACAGCACCTAGCTGGAGAGTCACAGAGATGCGTAACATAACGAATACGTCACTGGCTGAGTCAGTGGCTGTTCATCAACAACACATTTTTTTTTGTCCGTGTAGT…
CLocus_46557	1	863	67.75	104.81	24	30730	TGCAGATATTTAAGCATTGCATTAATTTTACTACTTTTTGTTCTGACAGAGACCTGCCGTGACGTGTTATGCCCGGGAAGCTCCACGTGCGTCGTTGACCAGACGAATAACGCATATTGTGTGATGTGTAATCGGATCTG
CLocus_131629	1	864	67.75	104.81	133	68952	TGCAGCAGCTGAAGAAGGGCGTGGTAACCCTGACTGTGAGGACTCGTCTCCGCAGCCCCAGCCTGACTCCGTGCCCTACCCCCACCCTCCTCAGTCGCTCCTCCTCCCCTAACTCCAACGCCAGTGGGGGAAACCCCATACCGTCCAGTTTCGACGAAACCCCCGAAGTCCGCAAGGGACCGCCCAGACCTGGCCCCAAGGACCGCGTCGTTATGGAGGTTACACTCAGTAAAGGTGACAAAGTTGGGGTTTGAACTTTGCTGTTTCGGTTCAGTTGTTAACCTCAGTTCTCTCCGGTGTGAGATGTGCTTTTGTTGACACTTACTTTGAGACCGTAGGGAGTAAGTAACCACAAGAAAATCCTCTTAAATCCTCCCGTCAACTCTCTCAATGCAATAA…
CLocus_8250	1	865	67.75	104.81	169	5557	TGCAGAGTCATCCAGTGGGACGGGAGCCCCGGGCGCCCCTGCCTCCTCGCCCCCGAGGTCAGACGCCAGCTTCATCTCCACGCCGCCCTCCTCCGCCTCGATCTCTGCCTCCGCCACGGCGTTACAGTACGATGAATAACTATCATAGCGGACCCTCTTCTTGGTGTAGGACACGCTCCCAGACCTCTCCCCCTCCCCCACCAGCTTCTCACTGTCCTCTCGTGCCTCTCGGGCCTCGCGGGACTCGGAGCGGAGCAGCGGCTGGACCGGCATGCCACAGATGGCGGCCGTGTAGCAGGTATAACTGTTGTTGCGACGCAGCAGGCGGTAGTTGTTGTCTGGCGTGGGGGCGGAGTGGTCGTCCTCCAGCCGTCCCAGGTGGATCTTGTGGAGCAGGTC…
CLocus_28305	1	866	72.14	104.81	363	19210	TGCAGAATAACTTTTTTTCAAGTAACCACTGGAATTTATAACAGACTACAACCACCTTCAATAACAGAACTGACACCAGGATTGCAGGGCCGTTTCCTACTTTGTGACATTACAGTTGAACATCATTACCTTTATTTGACATTAAGTTACATGATATACTACAAATCATTTACCCTACCTAACAGATAACGCTGTACTATATTGTGTACCTGAAATAGAGTCCTGGCAATCCCCACACAACAAAAAAAACAGGTTACCTCCTTCAAACCTGATGGGGGTCCATCTGTGTTTGTATTGTCTTGAAGCGAATGCTGTGTATGAACCCGAAAAAAAGGCTAAATGTGAAAACTGGCAATTATGATTGTGGTCATGTTGATGTTTGGTTGGTCTTTACCAATG…
CLocus_109080	1	867	73.85	104.81	71	62101	TGCAGTCCAGCACTGGACACAAACACACTACACCCCCAGGGCCACACCTACACATTGAGACGAGGACCTATGCCCTAGGAGCCCGCTCAAATCCTTCATCTGGGATGGGGGGAGGGAGGGAGAAAGAGGGAGGAAAGGGAGGGGGATGCACAAACCTGCCCCTCGCGCCTGGCTGCCCCTCAATGACGACTGACTTCAGATAGGAACAATAACAGAGGTGTCTAGTCTGGCTTCCATTCAGCCCAGGATTTTATACAGCCCAGAGACACTCCCTGCCATTCTGGCTATTCATATGGCCTCTGTGGCAGCTAACTAGTGGAGAGTCAGGCATCAAAGCAGGGGGTCGGTGACCATTTTGGATCCAAAAACTGCTCAGTCAAACACACCACTTCCTAATAA…
CLocus_41636	1	868	74.69	104.81	151	27655	TGCAGTTGGTGATTAACTAACAGGGCTATAAAGTATGTTTCTCAGATGCCTATGGACTGGGGCCAAAGAGCACTTCCATTATAACCATTCAGAAACAGACCACTATCGTCAGTTTCCCCCTTCCTCACCTTATTGGTTTGTTAGCTAGTTAGGTGAATACATGACAACATGTCCTTTCTCCCTCCAGCTTCCTGCTAGCCTGGAAGATCAGATTCCCATCTGGTTTTTGCTGTTTGCACATTCCCTGAAAAATCTGCCAATAGATCTGATTTGGGCTGCCAGTGTAAACACAGCCTTTGTGAATACAGGCCTTGCAGTGTCTTTTGACCTGACCCTGGCGGTAGTTTGACTGTCACAGCCAGGTAAAATCCACAGCTCTGCTGAACAGACTAAATCTGC…
CLocus_72958	1	869	75.54	104.81	96	45824	TGCAGTAGAGGTTGACACAAACAGTGGAAAACAAAAATCACTCACTGTGCACAGCAGACCATTTCAAATGAATTGTAGGCTGATACACAGAAAATGTGATGGAATAATGTCTGATACCAAAATGCCTTCTCGGGCCACCCCAGACAGTGACATTCAGGGAGTCCAAAACCACAGCTCTTCTGACAAGACCAGAGAGCATCAGAAGAGAAATCCACACCTCTGGACTCTAGATTAGCTGTGCTTTTGGTAGGTTTGTGTACGATAGGTGACAGCAAGATACAGTGTCTTGCAAAAGTATTCAAACCCCTTATAACACAATGTCAATTCTAAAGTCAGATTTAAAACTATCATTGTGTGTCAACAAATCTACACAAAATAAAAATGTCAAAGTGGAAGAAA…
CLocus_54232	1	870	82.44	104.81	8	35467	TGCAGGCAGCAGGCAGCAGGGTGACGTCAGGCTGGAGACCTGCTGCTGTCAAAACCAACAACAAGTCCATCTGGGAATACTCTGTCTTTACCACCTCCATCAGACCGTCACGGTAGAACTACAGTACACCCTGTTATGGGGAAGTGTGTGAGAGAGAGAGATGTTTAAGAGAGCATGACAAATAAACATCACAGCTCTTAATAGATGAAACTTAACTTTGAGATGAGCCTGTTCATGTTCTTGACACAGTCATAGAACATGTTCAGATACATGTTACTAATTAAGATGCCACCAACTTCATGTGTACTATACTGTAGTGCTACTATACTTTACTATATGTTTTGTCTACTGTACTATAATATGCCGCAGTGCTACTATACTATACTTTACTTTACTATA…
CLocus_17089	1	871	83.57	104.81	80	11725	TGCAGCTTCTCAAAACAGCGGTTGATGCCTGGAGTGAAATAACCAGAGTAACCTGAAAAACAAAACCAGTGGAAAGTCGTCTCCATCCACTATTGGAATGCATATGGATTACGTGTCATTCCCCTGCCCCTTGTTTCTGCCAATTTGATAATCAATCATTCTGAATCTAAACTAATTTTGACATATTACTGAAGACAAATTACATTTGAAATAGTGAAAATATGATAACTTGATAACTTGATGTGCAGCCTGAGGCATGGAACAGAATGCAAGATTGTTTTTGTCACTTGGCAGATCATCGGCGCATCATGCAGCCCATTTCTAAGACATTCTAAGGTTGGTATCGTTCACAACTAAAGTTTCCAAATCACTCTGAATCTAGCATATAGGACCTGTTTC…
CLocus_17940	1	872	83.57	104.81	124	12363	TGCAGTGTAAACACAGATTATTTAGTGGTAAATATTGGCTCGTTTGGGGGAATTATGTTGTTGTTAGGAGTTTTTGGGCTGACACTTAGTGCTCAGCATCTCAGAGAAGAAAAGATGTCTGACAGGAAAATGGCTGCAACGAGCAATTAGTGTTTAGGGTGGCGGTGGTTCCAAGACAATACATGTTGAAGTAGGCACGGTGGTCAACAAGATATGTTTGACAGGTGCCTTTGTGTGTCGGCAAATCAACACCTTGGACCATAAGAGGAATCGCAAATTACAAGTTGGGTTACAAGCACTGCAAGTCCCCTGGATGTATTCTCCATTAACGGAGAACCAATATTGTTTAAATTTTTTCACTCATAAACATATCATTAACTACGGTGAGAGAGTCTTTCA…
CLocus_35823	1	873	83.57	104.81	35	24075	TGCAGTGGAAAGAAACTACCTGTTGTTAGTTAAGCTCAATTCTTTAATACAAAATGCCTTTTGTCAGTTTTTCTAGTCCATGTCTGAATTTATTAAAATGTTCTGTGGTAAAGTTGTTTTGTGTGACTGTTTTTTCCCCC
CLocus_80235	1	874	85.28	104.81	85	49358	TGCAGACTTTGTCAGTCTGATGCTGTTTGTTTGTTGTGGGCTGCCAGTGTCAATGGCTCATCAGCAAGTCCCTGCAAACCCGGCGCTGCGCATAATTACATGTGATTGCATTTGGATACCAAGTCCGCTTAATGTCGTTACTTATTAATAACTACAGAAGATAAGACGCAGGAAGTCAATAAATGCCAGTAACTGTACCCATTTCTTTCTCTGTAAAACAATACTTGTTAGATTTCGTGTGTATTTATTTGGCTTAGAGTTCATGTTAATAAATGGTATTTGCATTGCTTCTGTTCTATTGCACAATAACAAATCCCTCAATTGGGATCGATTCAGAAAGCCTTCAGGTCTGAACTGGGGGATGTCGATTATGATTCCAGTCACACAAGAATGTGAATG…
CLocus_17530	1	875	85.28	104.81	13	12053	TGCAGGAATGACCTTTAGATTATACACATCCCCTCTGGAATAGTCACAAAGATACTGCATTCAAACTGGTGAAATGGTCACAGATACTCTAGTCAAAATGAAATAGTCAAAATGATACTGTAGTGAAACAAGTCAAACAGTCAAAATCATACTATAGTCTGTAGTGAAAAAGGTAAAATATTCCAAATAATACTGTAGTATGTTGTGAAACAAGTGACCTTGTCAAAATGATAGCTATCAGTGCAGTGGTCACCAACCTTTTCTGAGTCAAGATCACTGAGATCATTTTCTGAGTCAAAATGCATGTTGAGATTTACCGCTCTGATTTTTAATTAACATGACTTAAAAAAAAT
CLocus_77814	1	876	85.28	105.55	7	48310	TGCAGCGGGAGACGCTGGTGGGAAGACAGAGGTAAGTGGCGGAGTAGATGGCAGTCACTGTCTCAATCTCTCCTTCTGTCCATCTCTCCTCCGTCCTCTAGCTGTCTTGATACACACAGCTCAAGACTTCTCTCCTTTCCCCTCTAGCTGTCTGTTCACTCACTTATACTCTCTCCCCCTACCCGTGTGTTCACTTACACTCTTGTCATTCCCGTCCGTCCGTTCACTTACGGTCTCTCACTTCTCTCCACCCCCCCCTGTCCATTCTCACTCTCCCCCTCTAGCTGTCCCCTCCTCTCCTGTGGATAGCGGAGCATCTCTCTCTGTTCACCAGACTGAAGGATTCACTCTCTTCATTCTTCCCCCTCTAGCTGTCCCCTCCTCCTGGGTACATGGAGG…
CLocus_49182	1	877	85.28	106.3	23	32343	TGCAGTGCAAAGGTCAATAATCTACGTTGGTTTGGAATTCTGTCTTAAGTCTCATCAAGATCTTTACAGACCTCCCTCCCCTCCTTCTCTAGACACTGTAGACTGGACCAGACATTATTCTGACCTGTTTTCTAAGTCCCATGACCCAC
CLocus_6049	1	878	85.28	106.3	123	4194	TGCAGGAATCCTTCTGCAGGTCTGTCTGAAGTTTGACTTTCTCCGTTCTTTTGACCATCAATCGGTCCTGCTCCAAAGTAAATAAAATGGTTACAAATATAGTGAATCAAACGGCTCTGTTCAAACGTAATTGGCACTTTCATTTACGGCTCATCGACTGCTTAAACTAGGTGAGATGTTTACAATATTCAGTCGCAGTACATGGAAAAATCTATAAATACAGTGCATTCGGAAAGTATTCAGACCACTTGACTTTTGCCACATTTTGTTACATTACAGCCTTATTCTAAAAAGGCTACAATATTCTCTCCCTCATCTACACACAATTCCCCATAATGACAGAGATAAAAACTTTGTATTAAATATAAAAAACAGAAATCATTTACATAAGTATTCAGA…
CLocus_65673	2	1	0	0	283	41962	TGCAGAGCAAGAACTGCAAACATGAAGTGTATTCAACGTTTAAAAAGCCTCGTCAATTTTGAATCTACATAACATTTCACATTTCCTGTTGCTGAGGGAATATTTTTGTGTTGTGTGATACCGCAGCCAGTTACAATCTGTTGTTACACAAGTGCATGGCACATGACAAGAGGTTCTTTCCCATACCGGGAGTTGAACCCGGGCCACCTGGGTGAAAACCAGTAATCCTTACCGCTAGACCATATGGGAAGATATTTACTTTAAAAAAACATCAAGGTCAAAACTATAAATGTTGAAATTATGCCTGTTGTAATTAAAAGCGCCATATTTTTTCTCAGAGATGTTGGGGAAAAGTCCCATATAAAATCAGTCTAAAATGTGTTTGAAGAGAGAACAGCC…
CLocus_52599	2	2	0	1.71	110	34416	TGCAGTGTACGATACCATTTTCTTGCTCTGAGTCTCTACTTTTATCCAATGTAAAAAATACAATTTCAAATTATGCTACATAATCGAGCCAGTCATCACAATTGGCAGTTATTTTTTTATACATGTTATCCAGCTTGTCATGTTAAATTGGCAGTTTCTTCCCCCATGTAACTCAGTTTGTGTCATGTTAATTTAGATGTTCCTCCATGTAATTCAGTTTGTGTCATATTATTTGAGAAGGTTTTTCCCCATTTAACTCTGCTGGGTAAAAAAAATGTAATTCATCTGTTTTGTTCCATGTAATTCGGTTAATTTCATGTTCATTTGACTTTTTGCGAAACAAAGAAAGAACTTAGCAGACAACCACAACATTGGTCTGTCAGAGATGGTGCAAATTAT…
CLocus_72271	2	3	0	1.71	228	45431	TGCAGTGCTGTCTGTGGATCTGGAGCCACAGCCCAGATACTTGGAAGATGTTCCTGACCAGAGAGTTGTTGGTGGTGAGGTCGCCCAGCCCAACTCCTGGCCCTGGCAGGTAAAACATTAGCCTGATCCCAGGACTGTACTATATGTGCTTAAGCCAACTCTTCGATACTCCACGGTCATAGGAGTTGGCTATGATACACACAGATCTGGGACCAGGCAAAAAAATATATATTACTGTTGAGACATGTTACTTGAATTAAACTTTGAGCACTAGACCTAGGCAGAAAATATTTGTTTTTTGTAGTATTTTTGAAAATACTAACTTACAAATACTCAAGGTAGTTGAATATACACTGAGTATACAAAACATTAAGAACACCTTCCTAATATTGAGTTGCA…
CLocus_88749	2	4	0	2	458	53734	TGCAGGCTGTCGGGCTGCCTGGTCACAAAGGAAGGCTGTGCTTCTCTGGCCTCAGCTCTGAAGTCAAACCCCTCCCATCTAAGAGAGCTGGACCTAAGCTACAATCACTCAGCTCTGAAGCTGTTCTCTGCAGGACTGGAGAAACTAAAGTATTTTGAGTGTTTGTATCTATCAGTATTGTCTGCATGCATGTGAGCGTGTTCCTGCATGTCTGCATGCATGTGAGTGCATTCTTGCCTGTCTGTGTGCATATGAGTTCCTGCGTGTCTGTATGGATATTAGTGTGTTTCTGCCTGTCTGTATGCATATGAGTGTATTCCTGTGTGTCTGCATGTATTTATATGAGTGTGTTCCTGCGTGTCTGTATGCATATCAAATCAAATTTTATTGGTCACATAC…
CLocus_117127	2	5	0	2	272	64936	TGCAGTATCACACAACACAAAAATATTCCCTCAGGAAATGTGACATGTTATGTAGATTCAAAATTGACAAGGCTTTTTAAACGTTGAATACACTTCATGTTTGCAGTTCTTGCTCTGCAGACCCTGTTAAAATTCATGCAACAACAGGCAGGATCAAATGAAGATATGCATCTGTAACAGAAAACCAAAGAACCTTGTCGTTGACAAAAGCTATGACTGTGTACACTGTTCTAGGAGTGACCTGACTTCACCTTGTCTGTGGGGCCAGTGGCGCAATGGATAACGTGTCTGACTACGGATCAGAAGATTCTAGGTTCGACTCCTGGCTGGCTCGTCACTATATTTAATTGATTGAAATCAAGCTGGGA
CLocus_78154	2	6	0	2	102	48436	TGCAGCTAAGAGGCAGAAAGACAGAGAAAGAGAGAGAGGAAGATAGAGTGAGATTGAGGAGAGGGATACAGAGAGTGGAGAGATGGACAGAGAGAAACAGGAAGATAGAGTGAGAGTGGGAGAGAGAATGGGGAAACAATGGAGAGAAAAAAAGACAGTGGACAGTCTCTGCTTCAGACTATGGTGAAGCTGTAGTAGTGGACCTCTCTGCTTCACTGTGGTGAAGCTATAGTAGTGGACTTCTCTGCTTCAGTCTGTGATGAAGCTGTAGCATAGCTCTTTGATTGTAGTCAGAAACACATAACCAGTATTTTCCATTGTTCTATTACAAAGATGAACCATTGACAGCTTGATTGATTGACTGGCTGACATCTTACCTTTATAGAATACCCCCCACAC…
CLocus_45822	2	7	0	2	141	30312	TGCAGTCATTTAACTGTGGCGCTGCGCCACTGCAAAATCATTGCCGCCATGCTAAACAAAACAAGTAATGATTAGAAAAATCTGGCAACCCCATAGTAGAATAGTTTATCTATTTACCTAGTCGGCTTGTTGTGTGTTCTATGCGAGATAAATATTCCTCTCGAGGCGCATTCAAGTTACGAGTGCCATAGGGAGTGAAACATGCATTCTGACAAGCAGTCAATCCACAATAATTCTTGCAATCGTGGAGAAAAACAGCAGTTTTAAAGGCATAAGTTAAAAAGAGGGCAATCACAGCTTTCCCTTCCTACTTTATTTATTTCTCAACTCCTAAATATGCGCGAACTGCACCATTTTAAACCCAGAGTTTTTAGCAGGGTCATGGATAAGCACTTTACT…
CLocus_31204	2	8	0	2	81	21240	TGCAGAGAAGGGGATTAACTAGTACATGATCACATGACATTAGGATTTGAAGGTAAGTTGGCAAATGTTGTTCACCCATTCAAAAAGACAGATATAATGTTTTTACTAAACATCTGTGCTAATCTTTATCCAACACAGTGTTACTCTCCTCTGAAACTATTATATTTATTTATGTAACCTTTATTATACCAGGCACGTCGATGGAGACAACATGTGGTTAATTTAGAACGTCGGCCTTATCATTAGGTGCTATGTATCCTTGGTTACATCTGAATTAGCATACACCCTGTACCACGCTAACGAGCAACCCTCAGTGTGTAATGAACCACCCGGACTGTGTTCAACGACGCATGACATGGTTCACACAGAAGAAAAGAGATACAGAAACAGCTATAATAA…
CLocus_121237	2	9	0	2.28	171	66124	TGCAGAGCAAGAACTGCAAACATGAAGTGTATTCAACGTTTAAAAAGCCTTGTCAATTTTGAATCTACATAACATGTCACATTTCTTGAGGGAATATTTTTGTGTTGTGTGATACTGTAGCCAGTTAAAATCTGTTGTTACACAAGTGCATGGCACATGACAAGATGTTCGTTCCCATACCGGGAGTTGAACCCGGGCCACCTGGGAAAACCAGGAATCATTACCGCTAGACCATATGGGAAGATATTTACTTTAAGAAAACATCAAGGTCAAAACTATAAATGTTGAAATTATGCCTGTTGTAATTAAAAGCGCCATATTTTTTCTCAGAGATGTTGGGGAAAAGTCCCATATAAAATCAGTCTAAAATGTGTTTGAAGAGAGAACAGCCAGACACAA…
CLocus_2392	2	10	0	2.28	24	1919	TGCAGCTGGTACCGGAGCGGCCCGCCACCAGAGAATGACTTCATGGACATGTCAGACCCTTGAGAGGGGTAGGATTGGGGTCAGGGAGGTGCTACTGTACTCCAGGACAGAGAGAGAAGAGGGGCAGGGGGCACTGACTGAAACACTACTGCTGCGTTCATGTGCTACTTGGAAATTCATACATGCTTGACTGGGAAACTTGAGTTGCTGTTTTCTCATGGAATTATCAATATTCCAGTTTCCAACATCCAAAACAACGTTTAGTAGGATTGATAGTAGCTGAGTTTCTGCTTCTCAGAGGAGTACATGAACGGAACACTAGACACAGAATATCTCTTCCTATTTCCTGACTAGTTCTCCAGAGTCCAGAGGCTCCTTGTATCTCCTCCTCCCTCTGAC…
CLocus_48408	2	11	0.76	2.28	171	31918	TGCAGATATCTGTACTACACAGGAAGTACATATGGTGATACAGGAGTCAGGGGTCACCAATCACAGTCACTAATCTGAAATAAAACATCACATTGAGGCTACAACATCCAGAGGGTAACATCAACTCAACACAAACATCCATTCTGCTCCACAACACCTACTGATGGAGCCGTCATCTTCATGCATTAGAACGTCATATATATCTCCTCCTCCTCACACACTGACCGAGGGCCAAGCTTCACGCAGGTAGCTAGCTACAGGTAGTTACAGGTAGCCGGCACTTTGACATCATCACACTCAACTGGCCAATTGAGTCCTCAGAGACACAGAGGCAGGGGATGGAGGCGGGACTTGGGAGTTATACAGTTACACACAGTTAATCTCAGACTGGGTCACGTT…
CLocus_66413	2	12	3.86	2.28	40	42376	TGCAGTTTTATCTACAGCCAGTGCTTAAATTATAATTGGTGCCGGAACAAAAAGTGAGTGCTAGAGGGGGATGACCTGGGGAGTTCTGATGTACCGGAACACATGAGAAAAAAAATCACCTTTATAATAAAGCATCGCATGCATATCATCACATTTGCATAGTGGCATAGAGCAGTAGAGGTTATAGTTGCACACATGGGGAACATTTTTAGTAGCTTAGGGTTGGCAGAATCTTTTTTAATACTGCACAAATGATCGAAATGGCAGGCTACTTTGACACTGACAAACAGTGATCAATAAAAATGACCTCGTCTTGAATACGTCCATAGCCTAGGCCTAGGTGTGTGGAAACACATATTGTAGGCTAAAATAGGAGGAAATTATAAACATATGAAAATA…
CLocus_24147	2	13	10.76	2.28	261	16414	TGCAGTTATATATGTACAGCGGACAGGTTTTGGGTCATGAAATATTATGTGGATGAAGGGAGGGTGCGGGTCGGGTTGAATAAAGAGAAAACAATACCTAAAATGTATAATTATGGTGCCATTTATATCTATAGGCTACCAATTGAGGTTTTTCTTTCATTCTTGTTAGGCTATCTGGCATTAGTGCATAAGCATAAACTTTAGGGCCTAACACGGAACCCAAACCGTCTGCGCGCGTGCGCCATCGTGCGCTATCGTGTATAAATGTATTTTGTCCCCCTACACCAAACGCGTTCACGACACGCAGGTTAAAATATCAAAACAAACTCTGAACCAATGACATTCATTTGGGGACAGGCCGAAAAGCATTAAACATGTATGGCAAACGGCCAACCGAAT…
CLocus_19059	2	14	10.76	2.28	24	13122	TGCAGATTGTTCCAGCCCAGCATGGGCGTCAAGCCGACCACGATGGCAACCATCCAACACACCACCACCGCCATGCCCGCGCGCCGCGGAGTCACCACACGCTTGTAGCTATGGAGACAGGAGACATTTTTTGTCAAAAACGGGTGAGGTGTTAGTGTATACTGAGCTGTACCTCTTTTAGTTCCCATTTACATGATATTTTAGTTCCCATTACATCATTTTTTGTTCCCATTTACATTATTTTTGTTCCCATTACATAATTTTTTGTTTCCATTTACATTATATTTTAGTTCCCATTTACATGCTTTCAAGAGCTTTGTTGTTTGACTTCGAGAACACGTTTGTGTAATGCACTACAAACTGTTTTCAGAGCATGCCAACGTCTGCAACTTGTCAAAA…
CLocus_12598	2	15	10.76	2.28	34	8635	TGCAGCGATATACGTCGCCTCTTCGCGAGGGTCGCGAGGGCCTTTCTTGTGTGGCCGGAACCTCTCCCAGATTCGAAGGGTGTTTTCCGAGGAATATTCGGGGCTGGAAGAGTAGCCGGAGTAGTTGTGGTGCCGGGAAGGGGAGAGCTGGGAGTAGGCGGCAGGGTCCCTTTTGGTACGTCCCAGGGGTTTGAGGAAGGAGGCCTTCTGGGATGGGGAGGGAGAGGGGGAGTCGTTGGCTCCCTCGTAGTAGAGGGCGGGGAAGGAGTGCCTGTGCTCAGAACAGTGGTAGTCTGGATGTACCTCCAGATGATGATGCTGCTGCTGCTTTCCCGGTCCTCCCCCTCCTCTTCCTCCCCCTCCGCAACCCACCCCACCTCCATTGACATTCACCCCACC…
CLocus_24557	2	16	11.32	2.28	270	16670	TGCAGTCCATTACTTACACTACATATACAGACTGGCTGACATTTCCAACACTTTCAGGGACATGGCAGATCAATATTTACTAATTATCTACAATACTTAGTTCCTTGAATGGTCAGATGTGAAGGGATATTTGAAAGCTTTGGTATCACACTTGAAGAACAACAAATTAACGTTTAACAACTAGTAAACATCAGTGTTTTGTAAATTACCCAATTTGAGCAACCTGGTCTCAGAGCATTTCATATTATTCTGTACGTAAATTCAAGATAATCAATTTAATATGATATGTTCTGTTTCGTACGGTATGTGTCAATTTGTGGATGTCCATCACCCATTTTGTATGATATGTTAGGAATTACAAGTCATATTATATGTTATGAATTTGCAAAACATATTATA…
CLocus_28828	2	17	11.32	2.28	131	19603	TGCAGAATGATTCCAAACTGTCACAGACTGGGCTACTGGCTACTAGCCTACTTGTTGCCTTGTTTCCATCATAAAGTCGCACCAGAAGTAGAAGAAAGTTGTTCGTGAGACACCTACCTGGCAAAATGAAATAAAGTCCACCGAAATGTGCTCAAAACAGTGCTATTTCTTATCCACTTTATCGACGTGTCTAGGAGGCTCAAATCCCTTTAATACAGTTGTATTGTCCACAAACCTCAGAAAGGTAACCTATTGAAATCCCTGTTCAGAACAGTTCTCTCTGTGTGCCAAAGTTGCAGTCCAGAAGTCTCCGAGAAGTATGCGCCCTATGTCAAGCGCGTCCCGAGTTTTAACAATTGGAGGACGAGAGGCTCTAGAACTTTAAAAATAAAAAAGTGG…
CLocus_33796	2	18	11.6	2.28	295	22825	TGCAGCCCACCACCTGCCTCCCTAGCAGCGCCATTTAGAGAGATAATTGAAAGGGGATGAGGAATTAGCAGTGTTTGCCTCAATCTCTTCTTCCTTCGGAGGAGGGGGGAGAGAGGAGGGAGGTAATGGAGGGAGAGATTAGGAGGACAAGGAAGAGGGGGAGGATATTAAGCGATTCTTATCGTGTTAATTGTTCTCGGCTGTAATTAGCCCAGGAACAAAACAGGTGGAGATGCTAGCGTGGGTGGACACACACCGAGAGGTGTGTGTGTGGACGGTGGGAACCAGACCCTGGAGCCCCTCTCTGTGTTTAGCAGGAGCGTGCTTATCGATTGGAAACACCTACACGTTTTACAGAGCGTGGCATGCTATTGGGGCGCTCCGCCATTTTGTTTTCTC…
CLocus_74595	2	19	11.88	2.28	183	46641	TGCAGAGAGAGAGAGCAGGTGGAGCTCCTCGTTCTACCATCTCTTCATCTCTTAACACATATGGACCCAGAACTTAATCGAGCAGCTGACCAATTTACATGAGACTTTAGTTCTGGGTTAACCAATATTGTGGCTTAAGCAATAGGGAATATATTGATTTTAAAATGAGCGATGGTCTCCCTCCCTTCCCCTCCTCTCTCCCTCATCATATTGATACTTCACACTCCTCACCCTCTCCAGCCAGATAAACGCCAGGGACGGTGCTGGTCAGACCCCATTACACCTGGCGTGTGAGCGGGGGGAAGTGGCATGTGTCAGAGAGCTGCTGGAGGAGTGCCAGGCTCGCACCGACATCAAAGACAAGAACGGGGAGACGCCAATGCATTGTGCCGCCAAGCA…
CLocus_58893	2	20	13.3	2.28	81	38205	TGCAGAAACACAGTACCAGCAAATGAGATGAAACAGACAGGTTTGGATTACTACTGCAACCATCTTCCCTCTGTGATTCAATGGCTACATGACATGTCATAAAGTACGATAGAAAATCCCTTTTCAGCCCTTCCTCTCCGTCTCCCCTCTACATTCCAACTATCACTGTCCATAAAACAATTGAATGAGTGAAAATATGCTTTTTAACAAAACATCTGCTATTTAGGGTATTGTACTCACACAGACACAGCGGGCCCCAGAAGTCTGCGCAGCATTTGGGCATGGTGACAGTCCTCTCACATTGATGGTTGCAGCCTTCCAACGCCAACTGTTGCCCTGCGATGGTTACTGAGTACAGGCAACCACTTTGGCCCACGTTGGTATCCATGGGCTGGGTGG…
CLocus_90926	2	21	13.58	2.28	128	54678	TGCAGACCAACAATATAAAGAAGTTAGGTAAGATGGAGAATAGTAAAGGTTAATATAATGTAAGATACAGAATATGAAAGGTTAAATAATATATGATACAGAATAGTTTGAGTCGAGGCTGTCTAGGCTTTAAAAACACC
CLocus_19386	2	22	17.36	2.28	48	13313	TGCAGTGCCAGTGGCAAACTTGCCAGACTAAATTATTAGAAAGAGTCAATTTCTAGATAATAAAAGGTCAAATATACAAGTCTAAGTGTCATTTTATATTAATTGAATTGAAGTTGGCTTGAAAATGTTTTGAGTTTATGCCGCGACCGTTAGTGGTATATGGTGGCATTCTGTCTCTGCACCACACTATCACAAGGGGGAGTTATCGGTAGTCTAAACTGTGGTACAAATTATCTTTTCATAAATTAATGGAGGTGTTTTCAGTCTGAGAATCTCTCTTCTGGCACTAGAGTCCTGCATCAGGCAACAATAACAAAAACTGTTGGTGGTCCTGGAATTAAGGCAGAGCTTGGGTAAATACAAAATGGGGGAATGTCACTTGACATGTGGACTGACGAT…
CLocus_7131	2	23	17.36	2.28	62	4832	TGCAGGAAGACAAATTCAACTATGAGATTACTGCCAAAGAGTCCCTGAGGAGGGTCCTACAGGAGAAGATCGAGGTGGCCAGGAAGCTGTCAGAGGTTGAGGTGAGACTGACTTACCTGTTCAATCCACCTCATTTTCTAACGCTTTTAAAACACGGAAGCCAAACGTGGAAACAACGGATACAACTTCCTCCATGCTAATGCATTGTTTTAATGAGTATGGGACTCTAGAAATCCCTGCATTAGCATGTTTCTGTTAGCTGATAACACCATATTATTGTCCTGCTGATGTGCCTGGACCTTTTTTAGGCTAAACTCCTGAGAAAAACCCCATAACCGATCCGATTGGTTGCCCAATCAGGCAATCTAGATGCACTTATTTCTAAATGAATATGCGTTC…
CLocus_12853	2	24	17.36	2.28	14	8776	TGCAGCACAGCTGTCGAGCTGCCGCAAAATTATATTCTCTGTCATTCAGTGAAATGTATTCCCTATTGTCCTGCTGGTAGTTGGAAAAAAACATCAACATTTTGAAAGAGTATTTTTATCATTTTATTAACAAAAGCATAAATATTGTACAGTATGTGCTTAAGCTGATATTTTTGCGGTTGCATGAGGTTTGGAATTAGAAATGTAGACCTTTAAGGTACTTAATACATTCCAAGTTGGGGGACTACAGTAGCCGAGCTATTGGACGATCCTTTTGTAAAGGTTGAAGAGTCTATTGTCCTGCTCATAGCTCATCGTGAAAACGTTGTTTACAGAATTCACAGCCTGCTACGCTTAAACAAAATGCCTTGAGCTGTCATCACTACTGTAAATAAACAC…
CLocus_74374	2	25	18.5	2.28	20	46471	TGCAGCAGCAGCAGGAGGATAGCTGGGTGAGGTTAGGCAGACACAAGGCACATCCACTCAACGTATCCATCACTTTGTCACAGCGAGACTCTGCCATGACACGGAACACACAGACAGCGTTGTTATAACACATTCATAACACACAGGCTTTGGTGACAACAGTCTATAAACACATACACAAATTTACAGTCAAGAGACATTAGGGGCGGGTTTCCCAGACTCCTATTTAGCCTGACTGTGGACAAAAACAAAACTCATTGGAGGATCTAATTTCCTCCTATTGTGTTGTGGAATATGTCTACATTCCAAATAGCAACCTATTTCCTTCATAGTACACTGCTTTTTGATTGAATGAGCCCAGAGGAAAGGACTGCCTCCTATGTGACTGTAGAATATAGA…
CLocus_42218	2	26	19.06	2.28	45	28059	TGCAGTGAGGGGTGTGTACTGTCTTGTGAGGCTCCTATTGATCCTTGTCCTGTCTGGAGCGTATTCTGTTTTCATGTAAGCGATGAGCATCAACTTTTAGTTCACTGCAATGTTAGTAAAACAGCTTTAAAAGTCACTTCCTGTTTCTTTCTGTTAGAAGCTGTTTTAATCAAATAACTTCAAGTCTTTTTCCTTCTGATGTTGTCAACAAATCCTGTCAGCATTACATCATATCCAACTATTTCGTAAGACTTAACTAAAACATTTATAAGTAAATTGTTTTTTAAAGATAGTTGTTACAGCCTTGAAAAAGACTGTTCCAGAGGACAACTATGTCATGGATTTTCATTATTACAGTCTAAAAATGGCCTCATTCAGTGTCTCATCCTCTCCTCTAGG…
CLocus_35121	2	27	19.34	2.28	170	23621	TGCAGTCAGTGAACTGTAGCTAGTGTATCTATTGAAAAAGCACATGGTAAAATGGTGCATCTGTAAACATTTACGTCAATGTACAGTAACAATCCAATACCTAATTTTGTTGTTATTGAGGCGTAGGAAGTGCAGGGTGCTCATCTGGTTGATACCAGGGGGAACCGTATCCAGCTGGTTGTGGTCTAAACACAGCTCTGTCATGGAGGTATAGGTGCCCAAGAAGGACTGTGGCTCTACTCCCTCCCCATCCAGCTTGTTGTAGGACAGGTACAGGTACTCTATGCCCGGCTCCATGTGGGCAAACACAAACCCTGAATTTTAAAACATAGAACAAGATGAACATTGTATTCCCAGAAGATAGCACTTAAGAAGTATTGATTAAAACACTTGTCCTCG…
CLocus_75600	2	28	19.9	2.28	167	47244	TGCAGTTGACAGAGCCCACGTTGGCTAAAGTAGCCTCTCAAGCCAATCGTAGAATGTGACGACAGAACTGAAACAAGTCGTACAATCTGGCCAGGTTGATATCATGACGTTAACCCCTTAAGGTCGATTTCCCCGCGGAAATCTAATCTAATACGTTTTTTTTTTGTTTTTTTTGCATTGGACACATCTCAATCCACTGCGTCCGCCATTGTCAAACTTCCGCATCTCTAGACGTCTGTAGCGTCCGAGCGGTTTGGCCTACAAAAATATTATGACCACTCTCTGGAAAGACTCTCACAAACACGATGGTGTTCTCGTTTCGTTCTTCTCTCTTACTTTTTTTTGTAATTTCTTGTTGGTTATTTTCTTAAAACTGCATTGTTGGTTAAGGGCTTGTAA…
CLocus_35820	2	29	20.47	2.28	50	24073	TGCAGCCACATCAAAACTCCAACACAGTAAACTTAATGACTAGCGACAACCAGAAAGCAAAATAACCCAGTATACTTTACCGGAGGTTCGCAGGCAGGCTGTCTGTACGGTGCAAGGCCAAGTAATTCCTTCCCTCTCCC
CLocus_80658	2	30	26.1	2.28	124	49548	TGCAGAAGTCAGAGCTACATCACTCTGTAGACTGGGAGTGCTACAACTGAAGAGACAAAATCTGAACTTATTTAGATGGTCTCTTTGGAGAAAGGGGAGAGAGGGAGGGACATAATGTGGGAGAAATAGAGAGAGAGAGGGAGGGGTGAATAAGGGGAAAGATAGATAGAGAGCAAGACAAGCCAGACAGAGAAAGAAGCTTGCCATTTGTAAAAGGTTTGAAGAAGTGAGGAGAATGTCATCTGGTTTAAGTGAGCAAAATAATCCTTCATAGTGGACCATAATTTCTATGTTACGAATTTATAAAATGTAAAATATACGACAAATTTGCTAAATGTAGTATATGTTACACATTTGCAAAACGTATGATATGTTACGAATTCTAGCTAGGTGGCTAAC…
CLocus_98680	2	31	27.52	2.28	53	57816	TGCAGGCGGTATTGCACCTGGCAATGCCAGCCTAGGTAATGGTAGGTTGACCGAAACCAGAAGCTACTTCCTGTCCTGCTGTACCTCCTGGGTACTACTGCCTCCTCCATTTTCCACCTCTTTCTGCCCTTAACATCATCCTCCTCTACCTCCTCCTCTCCTCCCTCCTCCGACTGTCTTTACCTCCTCCCTCCTCCCTCATAAAGGATAAGCAAAGTCATTGGTTTGAGTTATTACTAGTTTCCTGTGACTGATGTCTGAAGTAGATGAATCTACCCAAGTCCCAAATAGCACCCTACAGTCCCTGGTCAAAATTAGTTCACTATTTAGGGAATAGGGTGCCATTTGTGACGCAGGCATTGTGTTGTGAACAGTCTTCTTCTCAGCTTTGGGACTTTC…
CLocus_21646	2	32	27.8	2.28	88	14929	TGCAGGTCCAAAGATTGCAGATTAAATTCCACATATTCTATAACCATGTTTCACTACAGAAAATGTAAATTGAGGCTCAGATAAAAATACTAAAAAGAGAAGATGTCCAGATGTATAAATCACATCATAAATTCAGAATTTAGACTAACTGTTAAAAAAAAATTATCATTGTGTAAAAATGTACTGTACAACTTTAATAAAAACACTCCCAATGTCCACAACAAAGGTTTTAGAACACCTACTCATTCAAGGGTTTTTCTTTTCATAGCACTTATAGTCCTGGATACCTTGTAAATATGGGCCCAGAAGTGATGGTGACTAACCCAGTTATCAGTAGATCCCAGGGTTAGTTATGTCTAAGAAGGAAGCGTAGAATTCCTGATTACCGGATACAGGAAT…
CLocus_53931	2	33	34.06	2.28	43	35327	TGCAGTAAGTTGTTAAACGGGTTAGCAAAAACATCACTTTATCGTTTTTAATGTTGTGTTTTATACTGTCTCGGTATTTTTAATGTAACAATGTTTTGCCAAAGATTGTACATCTCTGAGAGGGCATTCCAAGAGGTTTTCAGAGAGAGAGCACTGCCAATAAAACCTGTTATTATTTCTGAACTAACGTCAGCGTCTCTCGACTTCAAGCACCTTTTTGATTTGGTGAAAACAAACATCAAAGAAAAATAATGAAATACAATCTGCTGACTTCTAAACCCCTCAAAAAAAAACATATGTCCCTTTATTGGAATACTTTCAGCCAACTGTAGACAAAAGGACACATCCCAAATGGTCCAAATGAAGTGCACTACATCAGAAAAATATTCCTCTCAGAAG…
CLocus_33487	2	34	34.34	2.28	50	22674	TGCAGAAGAGTAATTAAAGACTATCAAACCGTACTTTATAAAAACTATCCGTAGCTCGTGATAGATCAAGATGTCATGGAACACAGAGCGTGAGAGCTAAGTTGTACCTTAGCAACATTACAGAAGAGATGAGACGAACAGCCAGAGACTCAAGGCAATTATAAACTAAGGCAGTCCACCGAATAGAAGTTTAATCTATGACGCGTCCCGAGATAAATGGTAAATGTGAGTGAAAAATACAAACACAACAGCACTCACACATACAGACAGCTTACTGTGTTTAGAGTTGTGCAGCTCCCATGCAGAGGTGGTTTTGCAGGATGTAGGAAGGATGTGGTGTCTGAGAGACAAAAAGGTAAAGCTCTGTTCTACTGTAGCTGCTGCTGCTGTGGAAGTCAC…
CLocus_38025	2	35	34.34	2.28	58	25413	TGCAGGCTCCATCCACATTTCTCACTTCAGTTTTTATCACTTCTGCCCAGTTCTCTCTTCCGGGGGGAAAGAGAGGCAGAGAGAGATTTGAGTTAAGTTTTATTTTATCAATTTAATAATGCTATCTCTACAACCACCCACACAAACAACCTTCTTTTCCCCTTGGGAAGAGTTACAGGGTGATTAGAAGGATTTTCTCTCAGCCCTGTGAGGTAGAGTAATTGCTGTATAATTATGTTAAAATACAGAGACGAGACAAAATTGGAACCTGATATGCCGACAGTGTTGTATTTGGCAGAATGTGACAATGGGAGCTTATCGGGGATAAGTGTGTTGTCAAGAGTTTAATAATAAAAAGTAACTAAAAGTCTTGCAGGGTGAAAACACACAGCAAACACT…
CLocus_14589	2	36	39.65	2.28	258	10128	TGCAGAGCTGTTTATTCTCAGTTGGTCTTACTCCGCCATGGGCACAAACCACGTACTACAGGACTTCCCTTTACTCCAATACATTCCTTAATGACGTCTAGCTCCTTTTGACTCACACCAGTGAAGACTAACAATGACAACATACATTGTCTCCCTAATCTCTGCACGTCATCTGGTGCGGAGTATTCTCTGCTATGCAGTGATTATTTAAAGGTCCAATGCAGCCCTTTTTAGCTCAACATCTGGGTAACAATTAAGTATCTTACTGTGATTGTTTTCTATTAAAATGGTACTGTAGCTGCTTAGCAAAGAGCAATTTTTCAAGCTAAAATGTAGCTAGGACTGTCTGGGAGTGGTCTGAGTGGGGAGGGGACAACTGAAAACCAGCTGTTATTGGCA…
CLocus_95446	2	37	43.43	2.28	114	56489	TGCAGACAATCTGGGTACTCCCTCCCCGAGGGTGCTACGGTTTGAACTGGTCCAAAGATAGAAGCGTGTTCAACTTTCTCAGTCATTACCCACCTGTTCCCTGCTTTGTTACGTCTTGTTAGGTGTAACGCTCTATAAGATGAAATACTTCATTCTTTGATTATCCTTTTTTTAAATACAAATATTCATGTTATTTTAACGTCATTTTAAGTGTAGGTTGATGATGTAGAGTAACCCACATGGTTGTTATACACCCGTGTCCAGTGTGCTTTGACTGACTGTCCATTCGGTGCAGTGACCCAAGGCAACAACATCAATCTGCAAGTAGAATTTTTTCTTGACAAGTATACAGTTAAGCTATTTCTGGTATTTTAAGTGGTCCCTGACCATGTCTGACCA…
CLocus_48402	2	38	43.99	2.28	99	31915	TGCAGTGCTGTCAACTACATAGTACGACTACATAGTGTATGTTTATTTTTACAGTAATTATTATTCTACAAGTCCTCACCTGGGATTAGAACTCACAACCTCTAAGTTCATGGCATTCAGATCACACTGCTACTCAACAAAGTCTATGACTGATTTCACCTGTATGCCTATTCCTACATTCAGCACTTCAAAGTAAATCTCAGATTTTTATAATGCATTCAAGAAAAACTATTATATTTATCATTGTGATTCAAGAGTAATATTAAAACAGAATAATATTTCCCACAAACATTAGACAACTATAAAGAAAATTGCTGAAATAAGTACATTAAATAAATGATGAGAGAATAGTCAGATTAACTAATAAATAAAATAGCAGTGCAAAGATAATA
CLocus_85599	2	39	43.99	2.28	202	52161	TGCAGGACAATGTCTGACTCAGGTTTTCTAAGGATCAGTCTTCATACAGGATCAGTGGGTACTTTAAACTGATTTAAGCTTCTGTAAGTGTATAGTAAACCAGCCTTAACTAAATATTTATGACATTCAAAAACATTCGGAAGATCAAATATACATGCGGTGGACATAATGAGAAAGAGGGTGTTACACAGCGTGATATTGCATATTAGTTCCTTTCAGGGACTGAATATATAATGTAGCTACCGGTTTTAAATTTATGCAGCTAATTACCTCTTGTCTCGTTGTTTTGTATTGTTTTATGAGTTTTATAATTACATTTCACCTCATGCTAATGCAATTTAACTGCATTACAAGACAAAGCTGAAAGTATTTATCTACTACACTGAGTGATGTTGGATT…
CLocus_117154	2	40	44.28	2.28	94	64944	TGCAGAACAATCCATTCTGAAACATTTGTTCTAAGGCTAGTTTGATAGTTTCTTTGAGACCGGCGTATATTCATCGCCCACACACCATAACATTGGGTGAGTCACTCATTGCAAGCAGCTTGAAGGGTAATGAGTGTGGTTAAGAAGGCTGTGCTGGTTGATTAAAGCTAATGAAAAGGACTGACGATGCTCTTCACCTATCTAACCGTGTTATGCCTTCATAATACCATTTATTAGAACTATGACACATGATTTGTCAACATTGACTTTGACTCCTACACCTGTAATTGTATATTCCTCCCTCCCTCTCTCATCCTTCCCTCTCTCCCTCCCTCTCTCCTCCTTCCCTCCCCACTCCCGCCCTCTTTCGTCCCTCCCTCCCTCCCTCCCTCC
CLocus_94525	2	41	44.84	2.28	21	56202	TGCAGAGGGAACGTTTGATTAAAAAAATTCTGTTAAATTTAAATGTTTGCCCCGTGAAGTAATCCAACAATGTATACGCCACCATCTTATCTATTTCTTACTTTCTCTCATTGGTTGAGACGTGTGGGTGTGATACACTGAGTGAGACTCAGAAATCATTGATCGCTTTGAAAGACACTCACCTGTCTCAATGAGAGAAGATGAGAAATAGACAAAATGGCGAACATATACATCGTTGGATTACTTCATGGAGCAAAACGGTGACTTCCAAATCGAGAATTTTAAGAAAGTATCGGCTTAGCAAAGGTTAGTCGGGAAAAAAGAATCTCCTGCTACGACTATACAGCTGTTTGATATCAATGGTTATCACAGCTAATGATGCCAACCGTTTGATGCCGT…
CLocus_100886	2	42	45.97	2.28	18	58710	TGCAGGCTAAATGTGTTTCTCGGATGTGGTGTGGAAGGCTGCGCTCGTTCTCCAAGCCAAGGCATTACGTCATGGAATCAGAGTACAGGACGGGGCGAAACAAAAGCCTGCGTGAAAACGGACACCTCCACTGGTACAAACACCGGGATGAGACAATGAAAAGCGTTCTATACTGTTCTAATGAAAAGTCCACTCCAAATAGCCATGCGATCTTATTCTGTCAAGACAAATAAGTGTTTATTTTTGTTATTTAATAGGCTATTAACAAAACAAATATAATGTCTGGATCAATGACATCTTATAGATTTGATCAAACAAAAGCCTGAACGTTGATAACAGTAAATAATAAGTTTATAAAACCGAAACAAAACTTTGTAAAACGTTACGTAAACGTTTGAC…
[truncated: 14,820 more rows]
