# Supplementary material
Source: publisher figshare collection journal article supplement (https://gsajournals.figshare.com/articles/dataset/_/11908326)

**Figure S8:** Second division segregation ( $y$ ; measured as offspring heterozygosity) in 45 gynogenetic diploid offspring versus female map locations in centimorgans for linkage groups Sna1-Sna42 is listed on the y-axis. Each point is a SNP that was informative for half-tetrad analysis in the gynogenetic diploid family. Each orange or blue line corresponds to the linkage group identified on the X-axis. Linkage groups are delineated by alternating orange and blue lines. The red dashed line corresponds to the  $y=0.1$  threshold used to delineate centromeres. Centromere intervals were bounded by the minimum and maximum female map positions for which  $y \leq 0.1$ .

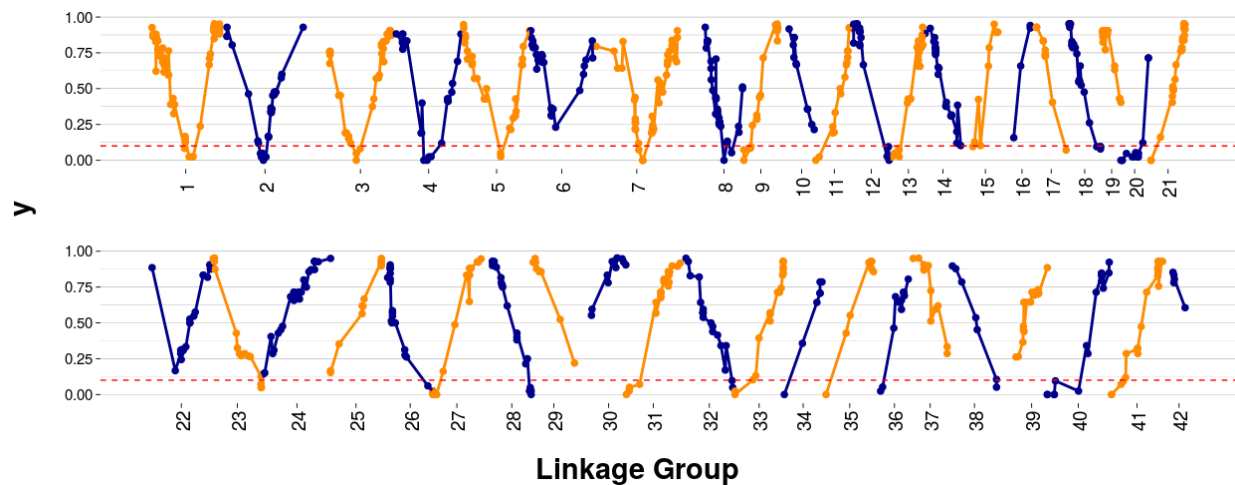

Supplement: Supplementary file 3 [file 1]
