# Supplementary material
Source: publisher figshare collection journal article supplement (https://gsajournals.figshare.com/articles/dataset/_/11908326)

**Figure S6:** Alignment of the female lake trout linkage groups to the Atlantic Salmon chromosomes displayed as an Oxford plot. Lake trout linkage groups are identified on the Y-axis, while Atlantic Salmon chromosomes are identified on the X-axis.

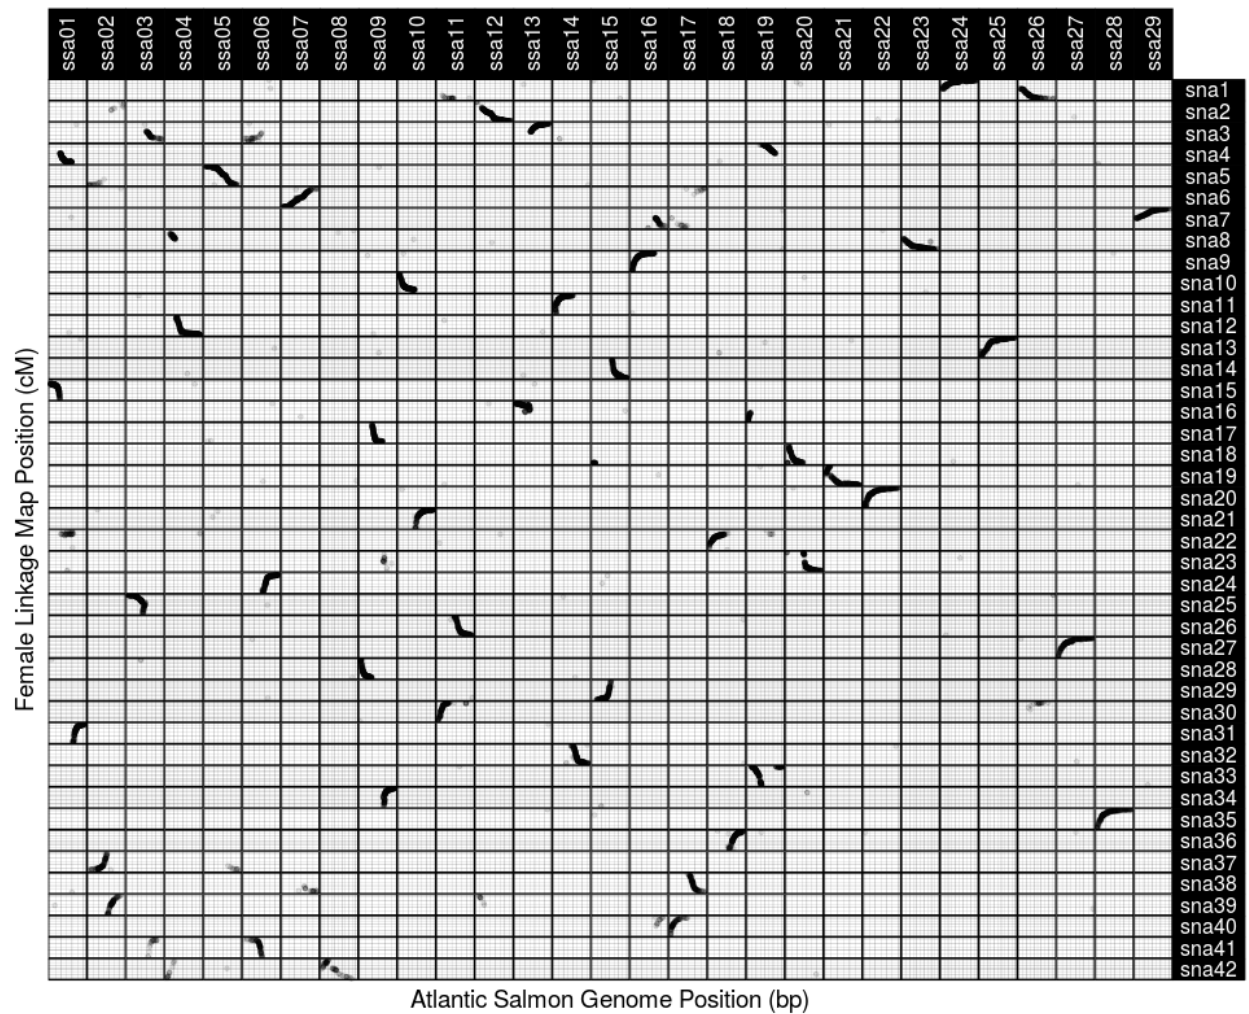

Supplement: Supplementary file 6 [file 1]
