# Supplementary material
Source: publisher figshare collection journal article supplement (https://gsajournals.figshare.com/articles/dataset/_/11908326)

**Figure S9:** Estimated female (bottom panel) and male (top panel) recombination rates based on alignment of linkage groups to Arctic char (blue), rainbow trout (green), and Atlantic salmon (red) genomes for each linkage group. The first 8 linkage groups (Sna1 – Sna8) are metacentric. Units are centimorgans per megabase. We only retained chromosomes for recombination rate estimations if greater than 50 mapped markers were aligned with mapping qualities of 60.

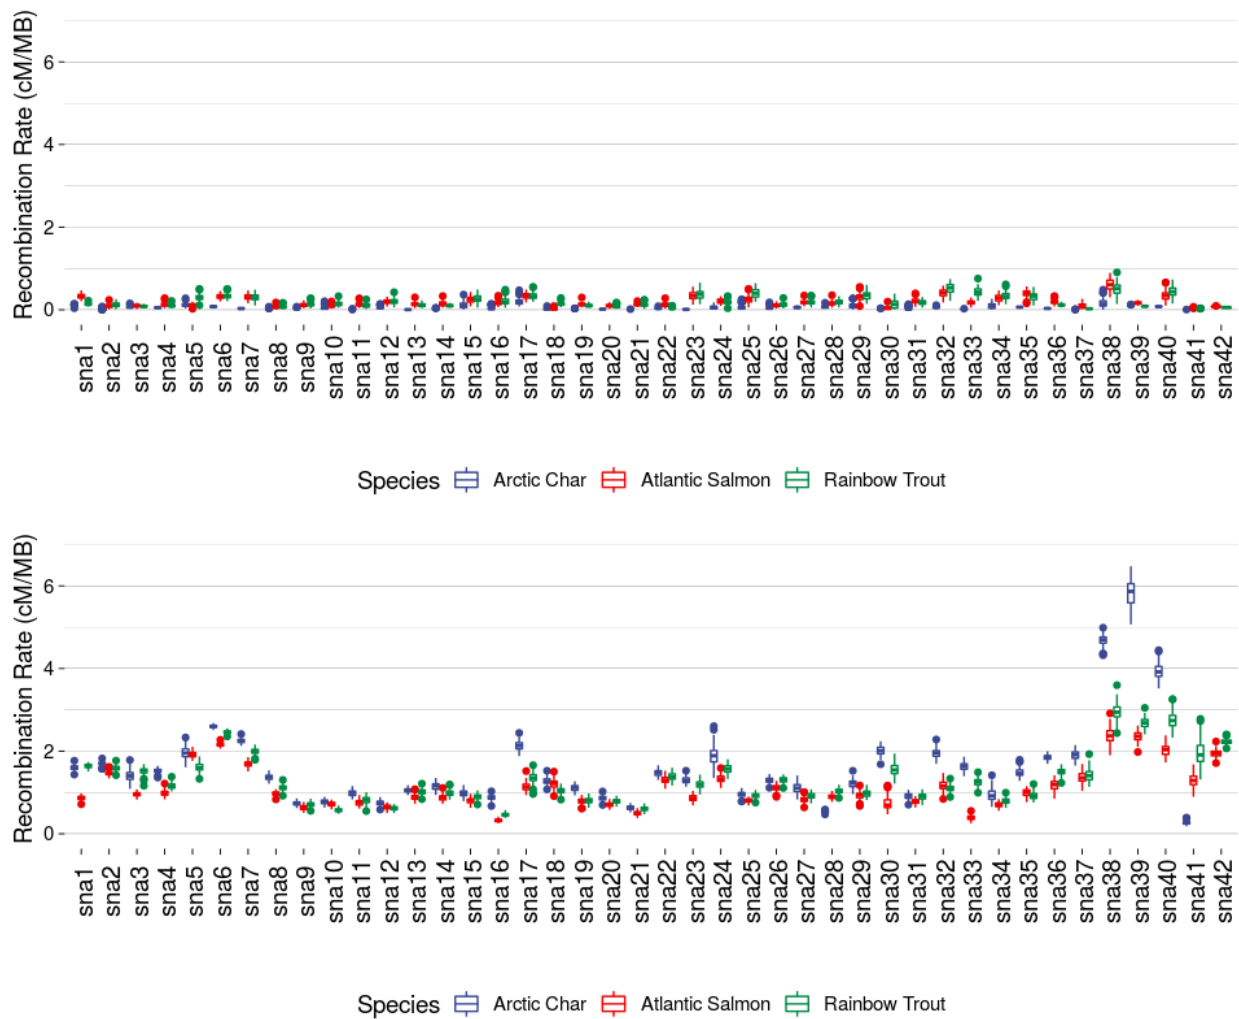

Supplement: Supplementary file 7 [file 1]
