# Supplementary material
Source: publisher figshare collection journal article supplement (https://gsajournals.figshare.com/articles/dataset/_/11908326)

**Figure S7:** MapComp plot displaying differences between the Brook Trout linkage map from Sutherland et al. 2016 and the lake trout linkage map presented in the manuscript. Lake trout linkage groups are displayed along the X-axis, while Brook Trout linkage groups are displayed along the Y-axis. Inversions differentiating the two species are present on lake trout linkage groups 12,23, and 28. These correspond to Brook Trout linkage groups 9, 25, and 35, respectively.

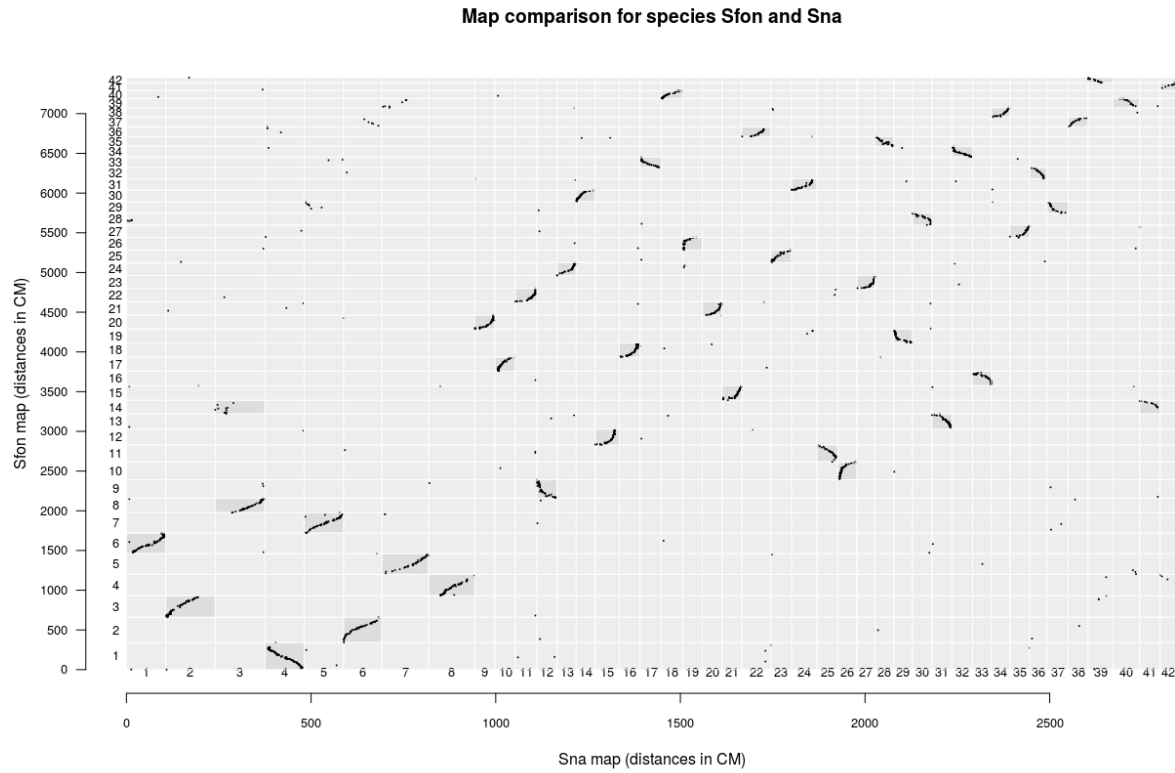

Supplement: Supplementary file 8 [file 1]
